# Supplementary material for: Identification of Hanks-Type Kinase PknB-Specific Targets in the Streptococcus thermophilus Phosphoproteome
Source: Front Microbiol. 2019 Jun 19;10:1329. doi: 10.3389/fmicb.2019.01329 (PMC6593474; doi:10.3389/fmicb.2019.01329)
Supplement: TABLE S2 — Identification by LC-MS/MS of 161 phosphoproteins present in the triplex with light, medium and heavy dimethyl labeling (48 Samples). [file Table_2.XLSX]

## Sheet: phosphoislands
			Supporting information Table S2. Identification by LC-MS/MS of phosphoproteins present in the triplex with light, medium and heavy dimethyl labeling (48 Samples)
			Filter list proteins: proteins filtered from original list of X!TandemPipeline. Here we conserved only proteins if number of peptide = 1 ; Maximum peptide Evalue = O.001 ; Maximum protein Evalue = -2
			106 functionals groups; total of 161 proteins
	Results from X!Tandem (version 2015.04.01.1)
	Parser 3.4.2 developped by PAPPSO platform ( http://pappso.inra.fr/bioinfo /)
	Results from X!Tandem (version 2015.04.01.1)
	Parser 3.4.2 developped by PAPPSO platform ( http://pappso.inra.fr/bioinfo /)
Modifications on amino acids
	Carbamidomethylation of Cys residues = +57.04
	Phosphorylation of S/T/Y = +79.96633
	Oxidation of Met residues = +15.99
	Deamidation of peptide N-terminus = -17.0265
	N-ter acetylation of the protein = +42.0
	-H2O Nterminal Glutamic acid = -18.01
Labelling light/medium/heavy	K and N terminal peptide :+28.0313 / +32.0564 / +36.0756
Informations Table
Group ID	Group to which protein belongs. Proteins sharing at least one peptide are grouped
Sub-groups	Corresponds to unique proteins. All the proteins in a sub group are identified with the same valid peptides
Phosphoisland ID
Description	Protein description
New protein name	New protein ID in NCBI database
MW	Molecular Weight (Da)
Phosphosites position
Spectra	Total number of MS/MS spectra identified per protein
Uniques	Number of unique peptide sequence identified for the protein
number of proteins sharing these phosphosites
Group ID	Sub-group ID	PhosphoIsland ID	Description	New protein ID	MW	Phosphosites positions	Spectra	Uniques	number of proteins sharing these phosphosites
a1	a1.a1	a1.a1.a1	gi|116627844|ref|YP_820463.1|STER_1068|Tyrosine-protein kinase (capsular polysaccharide biosynthesis) [Streptococcus thermophilus LMD-9]_hit-name:epsD _hit-score:422_hit-evalue:1e-120_identity-percent:90.2439024390244		26.7	211 215 217 218 220 221 223 224 227	290	5	1
a2	a2.a1	a2.a1.a1	gi|116627610|ref|YP_820229.1|STER_0782|Cell division initiation protein [Streptococcus thermophilus LMD-9]_hit-name:divIVA _hit-score:550_hit-evalue:1e-158_identity-percent:98.2817869415807		32.9	282	84	2	1
a2	a2.a2	a2.a2.a1	gi|116627610|ref|YP_820229.1|STER_0782|Cell division initiation protein [Streptococcus thermophilus LMD-9]_hit-name:divIVA _hit-score:550_hit-evalue:1e-158_identity-percent:98.2817869415807		32.9	192 197 201 205	55	3	1
a3	a3.a1	a3.a1.a1	gi|116627170|ref|YP_819789.1|STER_0283|hypothetical protein STER_0283 [Streptococcus thermophilus LMD-9]_hit-name:pcsB _hit-score:34_hit-evalue:0.006_identity-percent:21.6981132075472		66	9 10 13	69	8	1
a3	a3.a2	a3.a2.a1	gi|116627170|ref|YP_819789.1|STER_0283|hypothetical protein STER_0283 [Streptococcus thermophilus LMD-9]_hit-name:pcsB _hit-score:34_hit-evalue:0.006_identity-percent:21.6981132075472		66	73 74	53	2	1
a3	a3.a3	a3.a3.a1	gi|116627170|ref|YP_819789.1|STER_0283|hypothetical protein STER_0283 [Streptococcus thermophilus LMD-9]_hit-name:pcsB _hit-score:34_hit-evalue:0.006_identity-percent:21.6981132075472		66	41 43	6	1	1
a3	a3.a4	a3.a4.a1	gi|116627170|ref|YP_819789.1|STER_0283|hypothetical protein STER_0283 [Streptococcus thermophilus LMD-9]_hit-name:pcsB _hit-score:34_hit-evalue:0.006_identity-percent:21.6981132075472		66	90 96 101 102 104 105 106 110 115	6	1	1
a3	a3.a5	a3.a5.a1	gi|116627170|ref|YP_819789.1|STER_0283|hypothetical protein STER_0283 [Streptococcus thermophilus LMD-9]_hit-name:pcsB _hit-score:34_hit-evalue:0.006_identity-percent:21.6981132075472		66	222 224	1	1	1
a4	a4.a1	a4.a1.a1	gi|116627146|ref|YP_819765.1|STER_0253|groEL|Chaperonin GroEL (HSP60 family) [Streptococcus thermophilus LMD-9]_hit-name:groEL _hit-score:962_hit-evalue:0.0_identity-percent:95.5473098330241		56.8	532 539	88	1	1
a4	a4.a2	a4.a2.a1	gi|116627146|ref|YP_819765.1|STER_0253|groEL|Chaperonin GroEL (HSP60 family) [Streptococcus thermophilus LMD-9]_hit-name:groEL _hit-score:962_hit-evalue:0.0_identity-percent:95.5473098330241		56.8	349 354 355 356	9	2	1
a4	a4.a3	a4.a3.a1	gi|116627146|ref|YP_819765.1|STER_0253|groEL|Chaperonin GroEL (HSP60 family) [Streptococcus thermophilus LMD-9]_hit-name:groEL _hit-score:962_hit-evalue:0.0_identity-percent:95.5473098330241		56.8	241 242	8	1	1
a4	a4.a4	a4.a4.a1	gi|116627146|ref|YP_819765.1|STER_0253|groEL|Chaperonin GroEL (HSP60 family) [Streptococcus thermophilus LMD-9]_hit-name:groEL _hit-score:962_hit-evalue:0.0_identity-percent:95.5473098330241		56.8	88 89 90	3	1	1
a4	a4.a5	a4.a5.a1	gi|116627146|ref|YP_819765.1|STER_0253|groEL|Chaperonin GroEL (HSP60 family) [Streptococcus thermophilus LMD-9]_hit-name:groEL _hit-score:962_hit-evalue:0.0_identity-percent:95.5473098330241		56.8	314 319	2	1	1
a4	a4.a6	a4.a6.a1	gi|116627146|ref|YP_819765.1|STER_0253|groEL|Chaperonin GroEL (HSP60 family) [Streptococcus thermophilus LMD-9]_hit-name:groEL _hit-score:962_hit-evalue:0.0_identity-percent:95.5473098330241		56.8	268	2	1	1
a4	a4.a7	a4.a7.a1	gi|116627146|ref|YP_819765.1|STER_0253|groEL|Chaperonin GroEL (HSP60 family) [Streptococcus thermophilus LMD-9]_hit-name:groEL _hit-score:962_hit-evalue:0.0_identity-percent:95.5473098330241		56.8	371	2	1	1
a4	a4.a8	a4.a8.a1	gi|116627146|ref|YP_819765.1|STER_0253|groEL|Chaperonin GroEL (HSP60 family) [Streptococcus thermophilus LMD-9]_hit-name:groEL _hit-score:962_hit-evalue:0.0_identity-percent:95.5473098330241		56.8	150	1	1	1
a4	a4.a9	a4.a9.a1	gi|116627146|ref|YP_819765.1|STER_0253|groEL|Chaperonin GroEL (HSP60 family) [Streptococcus thermophilus LMD-9]_hit-name:groEL _hit-score:962_hit-evalue:0.0_identity-percent:95.5473098330241		56.8	174 178	1	1	1
a4	a4.b10	a4.b10.a1	gi|116627146|ref|YP_819765.1|STER_0253|groEL|Chaperonin GroEL (HSP60 family) [Streptococcus thermophilus LMD-9]_hit-name:groEL _hit-score:962_hit-evalue:0.0_identity-percent:95.5473098330241		56.8	322 327	1	1	1
a4	a4.b11	a4.b11.a1	gi|116627146|ref|YP_819765.1|STER_0253|groEL|Chaperonin GroEL (HSP60 family) [Streptococcus thermophilus LMD-9]_hit-name:groEL _hit-score:962_hit-evalue:0.0_identity-percent:95.5473098330241		56.8	457 460	1	1	1
a4	a4.b12	a4.b12.a1	gi|116627146|ref|YP_819765.1|STER_0253|groEL|Chaperonin GroEL (HSP60 family) [Streptococcus thermophilus LMD-9]_hit-name:groEL _hit-score:962_hit-evalue:0.0_identity-percent:95.5473098330241		56.8	506 509	1	1	1
a5	a5.a1	a5.a1.a1	gi|116627940|ref|YP_820559.1|STER_1172|Phosphoglycerate mutase 1 [Streptococcus thermophilus LMD-9]_hit-name:gpmA _hit-score:469_hit-evalue:1e-134_identity-percent:100		26.1	138 140 144	74	2	1
a5	a5.a2	a5.a2.a1	gi|116627940|ref|YP_820559.1|STER_1172|Phosphoglycerate mutase 1 [Streptococcus thermophilus LMD-9]_hit-name:gpmA _hit-score:469_hit-evalue:1e-134_identity-percent:100		26.1	90	1	1	1
a6	a6.a1	a6.a1.a1	gi|116628477|ref|YP_821096.1|STER_1761|Glyceraldehyde-3-phosphate dehydrogenase [Streptococcus thermophilus LMD-9]_hit-name:gapA1 _hit-score:633_hit-evalue:0.0_identity-percent:94.6428571428571		35.9	143 145 148 151 153 154	42	1	1
a6	a6.a2	a6.a2.a1	gi|116628477|ref|YP_821096.1|STER_1761|Glyceraldehyde-3-phosphate dehydrogenase [Streptococcus thermophilus LMD-9]_hit-name:gapA1 _hit-score:633_hit-evalue:0.0_identity-percent:94.6428571428571		35.9	211	19	1	1
a6	a6.a3	a6.a3.a1	gi|116628477|ref|YP_821096.1|STER_1761|Glyceraldehyde-3-phosphate dehydrogenase [Streptococcus thermophilus LMD-9]_hit-name:gapA1 _hit-score:633_hit-evalue:0.0_identity-percent:94.6428571428571		35.9	267 270 271 273 280 281 287 288	9	1	1
a7	a7.a1	a7.a1.a1	gi|116628133|ref|YP_820752.1|STER_1392|serine/threonine protein kinase, fused to several beta-lactam (PASTA) domains [Streptococcus thermophilus LMD-9]_hit-name:pknB _hit-score:1052_hit-evalue:0.0_identity-percent:94.4922547332186		67.7	289 291 293 301	42	4	1
a7	a7.a2	a7.a2.a1	gi|116628133|ref|YP_820752.1|STER_1392|serine/threonine protein kinase, fused to several beta-lactam (PASTA) domains [Streptococcus thermophilus LMD-9]_hit-name:pknB _hit-score:1052_hit-evalue:0.0_identity-percent:94.4922547332186		67.7	165 167 169 171 175	1	1	1
a8	a8.a1	a8.a1.a1	gi|116627995|ref|YP_820614.1|STER_1230|Phosphomannomutase [Streptococcus thermophilus LMD-9]_hit-name:pgmA _hit-score:49_hit-evalue:2e-07_identity-percent:37.0967741935484		47.8	99 101	43	1	1
a9	a9.a1	a9.a1.a1	gi|116628570|ref|YP_821189.1|STER_1876|Fructose/tagatose bisphosphate aldolase [Streptococcus thermophilus LMD-9]_hit-name:tnp1191 _hit-score:_hit-evalue:1.2_identity-percent:29.1666666666667		31.4	5 18 25	29	5	1
a9	a9.a2	a9.a2.a1	gi|116628570|ref|YP_821189.1|STER_1876|Fructose/tagatose bisphosphate aldolase [Streptococcus thermophilus LMD-9]_hit-name:tnp1191 _hit-score:_hit-evalue:1.2_identity-percent:29.1666666666667		31.4	233	9	1	1
a9	a9.a3	a9.a3.a1	gi|116628570|ref|YP_821189.1|STER_1876|Fructose/tagatose bisphosphate aldolase [Streptococcus thermophilus LMD-9]_hit-name:tnp1191 _hit-score:_hit-evalue:1.2_identity-percent:29.1666666666667		31.4	211	4	1	1
b10	b10.a1	b10.a1.a1	gi|116628430|ref|YP_821049.1|STER_1710|sucrose PTS, EIIBCA [Streptococcus thermophilus LMD-9]_hit-name:scrA _hit-score:1031_hit-evalue:0.0_identity-percent:85.4660347551343		66.8	58 61 67	40	1	1
b10	b10.a2	b10.a2.a1	gi|116628430|ref|YP_821049.1|STER_1710|sucrose PTS, EIIBCA [Streptococcus thermophilus LMD-9]_hit-name:scrA _hit-score:1031_hit-evalue:0.0_identity-percent:85.4660347551343		66.8	351	1	1	1
b11	b11.a1	b11.a1.a1	gi|116627145|ref|YP_819764.1|STER_0252|groES|Co-chaperonin GroES (HSP10) [Streptococcus thermophilus LMD-9]_hit-name:groES _hit-score:181_hit-evalue:2e-48_identity-percent:100		9.8	23 31 34 35 37	34	2	1
b11	b11.a2	b11.a2.a1	gi|116627145|ref|YP_819764.1|STER_0252|groES|Co-chaperonin GroES (HSP10) [Streptococcus thermophilus LMD-9]_hit-name:groES _hit-score:181_hit-evalue:2e-48_identity-percent:100		9.8	58	2	1	1
b12	b12.a1	b12.a1.a1	gi|116627379|ref|YP_819998.1|STER_0524|GTPase - translation elongation factor [Streptococcus thermophilus LMD-9]_hit-name:tuf _hit-score:726_hit-evalue:0.0_identity-percent:92.713567839196		43.7	46 50 52	15	2	1
b12	b12.a2	b12.a2.a1	gi|116627379|ref|YP_819998.1|STER_0524|GTPase - translation elongation factor [Streptococcus thermophilus LMD-9]_hit-name:tuf _hit-score:726_hit-evalue:0.0_identity-percent:92.713567839196		43.7	162 164 177	14	1	1
b12	b12.a3	b12.a3.a1	gi|116627379|ref|YP_819998.1|STER_0524|GTPase - translation elongation factor [Streptococcus thermophilus LMD-9]_hit-name:tuf _hit-score:726_hit-evalue:0.0_identity-percent:92.713567839196		43.7	223 225	2	1	1
b12	b12.a4	b12.a4.a1	gi|116627379|ref|YP_819998.1|STER_0524|GTPase - translation elongation factor [Streptococcus thermophilus LMD-9]_hit-name:tuf _hit-score:726_hit-evalue:0.0_identity-percent:92.713567839196		43.7	65	1	1	1
b12	b12.a5	b12.a5.a1	gi|116627379|ref|YP_819998.1|STER_0524|GTPase - translation elongation factor [Streptococcus thermophilus LMD-9]_hit-name:tuf _hit-score:726_hit-evalue:0.0_identity-percent:92.713567839196		43.7	26	1	1	1
b13	b13.a1	b13.a1.a1	gi|116628556|ref|YP_821175.1|STER_1854|Predicted kinase related to dihydroxyacetone kinase [Streptococcus thermophilus LMD-9]_hit-name:rpoC _hit-score:30_hit-evalue:0.10_identity-percent:19.8412698412698		59.3	2 5 6 7	30	2	1
b14	b14.a1	b14.a1.a1	gi|116627519|ref|YP_820138.1|STER_0684|eno|Enolase [Streptococcus thermophilus LMD-9]_hit-name:eno _hit-score:853_hit-evalue:0.0_identity-percent:99.5391705069124		46.9	370 373 376 379 380	18	2	1
b14	b14.a2	b14.a2.a1	gi|116627519|ref|YP_820138.1|STER_0684|eno|Enolase [Streptococcus thermophilus LMD-9]_hit-name:eno _hit-score:853_hit-evalue:0.0_identity-percent:99.5391705069124		46.9	2	6	1	1
b14	b14.a3	b14.a3.a1	gi|116627519|ref|YP_820138.1|STER_0684|eno|Enolase [Streptococcus thermophilus LMD-9]_hit-name:eno _hit-score:853_hit-evalue:0.0_identity-percent:99.5391705069124		46.9	39 42 43	5	1	1
b15	b15.a1	b15.a1.a1	gi|116628669|ref|YP_821288.1|STER_1987|Uncharacterized conserved protein containing XRE-family DNA-binding domain [Streptococcus thermophilus LMD-9]_hit-name:purH _hit-score:25_hit-evalue:1.1_identity-percent:38.8888888888889		32	58 60	23	2	1
b15	b15.a2	b15.a2.a1	gi|116628669|ref|YP_821288.1|STER_1987|Uncharacterized conserved protein containing XRE-family DNA-binding domain [Streptococcus thermophilus LMD-9]_hit-name:purH _hit-score:25_hit-evalue:1.1_identity-percent:38.8888888888889		32	96	3	1	1
b16	b16.a1	b16.a1.a1	gi|116628624|ref|YP_821243.1|STER_1937|hypothetical protein STER_1937 [Streptococcus thermophilus LMD-9]_hit-name:citB _hit-score:27_hit-evalue:0.044_identity-percent:29.6296296296296		10.1	4 7	23	4	1
b17	b17.a1	b17.a1.a1	gi|116628008|ref|YP_820627.1|STER_1243|Phosphotransferase system, HPr-related protein [Streptococcus thermophilus LMD-9]_hit-name:ptsH _hit-score:146_hit-evalue:7e-38_identity-percent:88.5057471264368		8.8	12	19	1	1
b17	b17.a2	b17.a2.a1	gi|116628008|ref|YP_820627.1|STER_1243|Phosphotransferase system, HPr-related protein [Streptococcus thermophilus LMD-9]_hit-name:ptsH _hit-score:146_hit-evalue:7e-38_identity-percent:88.5057471264368		8.8	46 62 64	3	3	1
b17	b17.a3	b17.a3.a1	gi|116628008|ref|YP_820627.1|STER_1243|Phosphotransferase system, HPr-related protein [Streptococcus thermophilus LMD-9]_hit-name:ptsH _hit-score:146_hit-evalue:7e-38_identity-percent:88.5057471264368		8.8	31	1	1	1
b18	b18.a1	b18.a1.a1	gi|116627418|ref|YP_820037.1|STER_0568|rplL|Ribosomal protein L7/L12 [Streptococcus thermophilus LMD-9]_hit-name:rplL _hit-score:125_hit-evalue:2e-31_identity-percent:68.5714285714286		12.3	16	10	1	1
b18	b18.a2	b18.a2.a1	gi|116627418|ref|YP_820037.1|STER_0568|rplL|Ribosomal protein L7/L12 [Streptococcus thermophilus LMD-9]_hit-name:rplL _hit-score:125_hit-evalue:2e-31_identity-percent:68.5714285714286		12.3	94 101	7	3	1
b18	b18.a3	b18.a3.a1	gi|116627418|ref|YP_820037.1|STER_0568|rplL|Ribosomal protein L7/L12 [Streptococcus thermophilus LMD-9]_hit-name:rplL _hit-score:125_hit-evalue:2e-31_identity-percent:68.5714285714286		12.3	55 61 62	4	1	1
b19	b19.a1	b19.a1.a1	gi|116627604|ref|YP_820223.1|STER_0776|Actin-like ATPase involved in cell division [Streptococcus thermophilus LMD-9]_hit-name:ftsA _hit-score:850_hit-evalue:0.0_identity-percent:96.5065502183406		49.8	427	20	2	1
b20	b20.a1	b20.a1.a1	gi|116628515|ref|YP_821134.1|STER_1810|UDP-glucose pyrophosphorylase [Streptococcus thermophilus LMD-9]_hit-name:galU _hit-score:595_hit-evalue:1e-172_identity-percent:98.3552631578947		33.6	154 157 160 161 168 169	19	1	1
b21	b21.a1	b21.a1.a1	gi|116627943|ref|YP_820562.1|STER_1175|nucleoid DNA-binding protein [Streptococcus thermophilus LMD-9]_hit-name:hstH _hit-score:142_hit-evalue:7e-37_identity-percent:84.6153846153846		9.5	71	17	1	1
b22	b22.a1	b22.a1.a1	gi|116627174|ref|YP_819793.1|STER_0288|Predicted periplasmic solute-binding protein [Streptococcus thermophilus LMD-9]_hit-name:pabC _hit-score:1149_hit-evalue:0.0_identity-percent:91.1854103343465		73	139	12	1	1
b22	b22.a2	b22.a2.a1	gi|116627174|ref|YP_819793.1|STER_0288|Predicted periplasmic solute-binding protein [Streptococcus thermophilus LMD-9]_hit-name:pabC _hit-score:1149_hit-evalue:0.0_identity-percent:91.1854103343465		73	15	3	1	1
b22	b22.a3	b22.a3.a1	gi|116627174|ref|YP_819793.1|STER_0288|Predicted periplasmic solute-binding protein [Streptococcus thermophilus LMD-9]_hit-name:pabC _hit-score:1149_hit-evalue:0.0_identity-percent:91.1854103343465		73	182	2	1	1
b23	b23.a1	b23.a1.a1	gi|116627321|ref|YP_819940.1|STER_0461|tRNA nucleotidyltransferase/poly(A) polymerase [Streptococcus thermophilus LMD-9]_hit-name:papL _hit-score:787_hit-evalue:0.0_identity-percent:99.2537313432836		46.1	391	17	1	1
b24	b24.a1	b24.a1.a1	gi|116627311|ref|YP_819930.1|STER_0449|hypothetical protein STER_0449 [Streptococcus thermophilus LMD-9]_hit-name:cbpD3 _hit-score:25_hit-evalue:0.60_identity-percent:42.8571428571429		18.3	64 65	16	1	1
b25	b25.a1	b25.a1.a1	gi|116627083|ref|YP_819702.1|STER_0163|Molecular chaperone [Streptococcus thermophilus LMD-9]_hit-name:dnaK _hit-score:1061_hit-evalue:0.0_identity-percent:92.5864909390445		64.7	387	7	1	1
b25	b25.a2	b25.a2.a1	gi|116627083|ref|YP_819702.1|STER_0163|Molecular chaperone [Streptococcus thermophilus LMD-9]_hit-name:dnaK _hit-score:1061_hit-evalue:0.0_identity-percent:92.5864909390445		64.7	592 595	4	1	1
b25	b25.a3	b25.a3.a1	gi|116627083|ref|YP_819702.1|STER_0163|Molecular chaperone [Streptococcus thermophilus LMD-9]_hit-name:dnaK _hit-score:1061_hit-evalue:0.0_identity-percent:92.5864909390445		64.7	473 475	3	1	1
b25	b25.a4	b25.a4.a1	gi|116627083|ref|YP_819702.1|STER_0163|Molecular chaperone [Streptococcus thermophilus LMD-9]_hit-name:dnaK _hit-score:1061_hit-evalue:0.0_identity-percent:92.5864909390445		64.7	110 115	1	1	1
b25	b25.a5	b25.a5.a1	gi|116627083|ref|YP_819702.1|STER_0163|Molecular chaperone [Streptococcus thermophilus LMD-9]_hit-name:dnaK _hit-score:1061_hit-evalue:0.0_identity-percent:92.5864909390445		64.7	295 300 302	1	1	1
b26	b26.a1	b26.a1.a1	gi|116628590|ref|YP_821209.1|STER_1899|Ribosomal protein L29 [Streptococcus thermophilus LMD-9]_hit-name:rpmC _hit-score:98_hit-evalue:2e-23_identity-percent:79.4117647058823		7.8	47	13	1	1
b26	b26.a2	b26.a2.a1	gi|116628590|ref|YP_821209.1|STER_1899|Ribosomal protein L29 [Streptococcus thermophilus LMD-9]_hit-name:rpmC _hit-score:98_hit-evalue:2e-23_identity-percent:79.4117647058823		7.8	17	2	1	1
b27	b27.a1	b27.a1.a1	gi|116628117|ref|YP_820736.1|STER_1367|Na+/xyloside symporter or related transporter [Streptococcus thermophilus LMD-9]_hit-name:lacS _hit-score:1133_hit-evalue:0.0_identity-percent:91.1671924290221		69.1	469 472 473	8	1	1
b27	b27.a2	b27.a2.a1	gi|116628117|ref|YP_820736.1|STER_1367|Na+/xyloside symporter or related transporter [Streptococcus thermophilus LMD-9]_hit-name:lacS _hit-score:1133_hit-evalue:0.0_identity-percent:91.1671924290221		69.1	486 488 489 491 496 497	6	1	1
b27	b27.a3	b27.a3.a1	gi|116628117|ref|YP_820736.1|STER_1367|Na+/xyloside symporter or related transporter [Streptococcus thermophilus LMD-9]_hit-name:lacS _hit-score:1133_hit-evalue:0.0_identity-percent:91.1671924290221		69.1	597	1	1	1
b28	b28.a1	b28.a1.a1	gi|116628007|ref|YP_820626.1|STER_1242|Phosphoenolpyruvate-protein kinase (PTS system EI component in bacteria) [Streptococcus thermophilus LMD-9]_hit-name:ptsI _hit-score:1082_hit-evalue:0.0_identity-percent:97.5736568457539		62.9	51 56	14	1	1
b29	b29.a1	b29.a1.a1	gi|116628019|ref|YP_820638.1|STER_1257|ldh|L-lactate dehydrogenase [Streptococcus thermophilus LMD-9]_hit-name:ldh _hit-score:642_hit-evalue:0.0_identity-percent:100		35.3	326	13	2	1
b29	b29.a2	b29.a2.a1	gi|116628019|ref|YP_820638.1|STER_1257|ldh|L-lactate dehydrogenase [Streptococcus thermophilus LMD-9]_hit-name:ldh _hit-score:642_hit-evalue:0.0_identity-percent:100		35.3	55	1	1	1
b30	b30.a1	b30.a1.a1	gi|116628434|ref|YP_821053.1|STER_1714|hypothetical protein STER_1714 [Streptococcus thermophilus LMD-9]_hit-name:asp _hit-score:52_hit-evalue:3e-09_identity-percent:28.9719626168224		13.9	2 3	13	1	1
b31	b31.a1	b31.a1.a1	gi|116627607|ref|YP_820226.1|STER_0779|Cell division protein [Streptococcus thermophilus LMD-9]_hit-name:int _hit-score:27_hit-evalue:0.22_identity-percent:29.5454545454545		21.6	68	12	1	1
b32	b32.a1	b32.a1.a1	gi|116627931|ref|YP_820550.1|STER_1163|Pyruvate kinase [Streptococcus thermophilus LMD-9]_hit-name:pyk _hit-score:909_hit-evalue:0.0_identity-percent:94.2		54.4	77	6	1	1
b32	b32.a2	b32.a2.a1	gi|116627931|ref|YP_820550.1|STER_1163|Pyruvate kinase [Streptococcus thermophilus LMD-9]_hit-name:pyk _hit-score:909_hit-evalue:0.0_identity-percent:94.2		54.4	407 409 412	4	1	1
b32	b32.a3	b32.a3.a1	gi|116627931|ref|YP_820550.1|STER_1163|Pyruvate kinase [Streptococcus thermophilus LMD-9]_hit-name:pyk _hit-score:909_hit-evalue:0.0_identity-percent:94.2		54.4	474	2	1	1
b33	b33.a1	b33.a1.a1	gi|116627605|ref|YP_820224.1|STER_0777|Cell division GTPase [Streptococcus thermophilus LMD-9]_hit-name:ftsZ _hit-score:718_hit-evalue:0.0_identity-percent:87.0454545454545		46.4	2 4 7	9	1	1
b33	b33.a2	b33.a2.a1	gi|116627605|ref|YP_820224.1|STER_0777|Cell division GTPase [Streptococcus thermophilus LMD-9]_hit-name:ftsZ _hit-score:718_hit-evalue:0.0_identity-percent:87.0454545454545		46.4	339 341 342	3	1	1
b34	b34.a1	b34.a1.a1	gi|116627378|ref|YP_819997.1|STER_0523|cell division membrane protein [Streptococcus thermophilus LMD-9]_hit-name:ftsW _hit-score:744_hit-evalue:0.0_identity-percent:90.3755868544601		47	407 409	12	2	1
b35	b35.a1	b35.a1.a1	gi|116628425|ref|YP_821044.1|STER_1705|secA|Preprotein translocase subunit SecA (ATPase, RNA helicase) [Streptococcus thermophilus LMD-9]_hit-name:secA _hit-score:1643_hit-evalue:0.0_identity-percent:98.5865724381625		96.2	752	7	1	1
b35	b35.a2	b35.a2.a1	gi|116628425|ref|YP_821044.1|STER_1705|secA|Preprotein translocase subunit SecA (ATPase, RNA helicase) [Streptococcus thermophilus LMD-9]_hit-name:secA _hit-score:1643_hit-evalue:0.0_identity-percent:98.5865724381625		96.2	803 804 806	4	1	1
b36	b36.a1	b36.a1.a1	gi|116627594|ref|YP_820213.1|STER_0765|hypothetical protein STER_0765 [Streptococcus thermophilus LMD-9]_hit-name:tnpSth1 _hit-score:30_hit-evalue:0.062_identity-percent:20.4081632653061		52.3	74 75	10	1	1
b37	b37.a1	b37.a1.a1	gi|116628577|ref|YP_821196.1|STER_1886|Adenylate kinase [Streptococcus thermophilus LMD-9]_hit-name:adk _hit-score:433_hit-evalue:1e-123_identity-percent:99.5412844036697		23.8	51	10	1	1
b38	b38.a1	b38.a1.a1	gi|116628478|ref|YP_821097.1|STER_1762|Translation elongation factor (GTPase) [Streptococcus thermophilus LMD-9]_hit-name:fus _hit-score:1366_hit-evalue:0.0_identity-percent:100		76.5	43 48	9	1	1
b39	b39.a1	b39.a1.a1	gi|116627434|ref|YP_820053.1|STER_0588|Predicted sulfurtransferase [Streptococcus thermophilus LMD-9]_hit-name:rheB _hit-score:28_hit-evalue:0.27_identity-percent:44.7368421052632		37.6	115 116	9	1	1
b40	b40.a1	b40.a1.a1	gi|116628446|ref|YP_821065.1|STER_1728|rpsF|Ribosomal protein S6 [Streptococcus thermophilus LMD-9]_hit-name:rpsF _hit-score:190_hit-evalue:4e-51_identity-percent:98.9583333333333		11	28	8	1	1
b41	b41.a1	b41.a1.a1	gi|116628505|ref|YP_821124.1|STER_1797|rplA|Ribosomal protein L1 [Streptococcus thermophilus LMD-9]_hit-name:rplA _hit-score:417_hit-evalue:1e-119_identity-percent:94.7598253275109		24.4	146	6	1	1
b42	b42.a1	b42.a1.a1	gi|116627614|ref|YP_820233.1|STER_0787|rpmE2|Ribosomal protein L31 [Streptococcus thermophilus LMD-9]_hit-name:rpmE _hit-score:169_hit-evalue:5e-45_identity-percent:100		9.2	31 34	4	1	1
b42	b42.a2	b42.a2.a1	gi|116627614|ref|YP_820233.1|STER_0787|rpmE2|Ribosomal protein L31 [Streptococcus thermophilus LMD-9]_hit-name:rpmE _hit-score:169_hit-evalue:5e-45_identity-percent:100		9.2	50	2	1	1
b43	b43.a1	b43.a1.a1	gi|116627515|ref|YP_820134.1|STER_0679|catabolite control protein A [Streptococcus thermophilus LMD-9]_hit-name:tnp1191 _hit-score:_hit-evalue:0.042_identity-percent:34.1463414634146		36.5	3	6	1	1
b44	b44.a1	b44.a1.a1	gi|116628305|ref|YP_820924.1|STER_1578|ATP-binding subunit of Clp protease and DnaK/DnaJ chaperones [Streptococcus thermophilus LMD-9]_hit-name:clpL _hit-score:1241_hit-evalue:0.0_identity-percent:93.7134502923977		77	47	3	1	1
b44	b44.a2	b44.a2.a1	gi|116628305|ref|YP_820924.1|STER_1578|ATP-binding subunit of Clp protease and DnaK/DnaJ chaperones [Streptococcus thermophilus LMD-9]_hit-name:clpL _hit-score:1241_hit-evalue:0.0_identity-percent:93.7134502923977		77	492 493 499 503	2	1	1
b45	b45.a1	b45.a1.a1	gi|116627632|ref|YP_820251.1|STER_0808|Cation transport ATPase [Streptococcus thermophilus LMD-9]_hit-name:pacL1 _hit-score:1602_hit-evalue:0.0_identity-percent:95.6719817767654		95.5	424 426	4	1	1
b45	b45.a2	b45.a2.a1	gi|116627632|ref|YP_820251.1|STER_0808|Cation transport ATPase [Streptococcus thermophilus LMD-9]_hit-name:pacL1 _hit-score:1602_hit-evalue:0.0_identity-percent:95.6719817767654		95.5	730	1	1	1
b46	b46.a1	b46.a1.a1	gi|116627134|ref|YP_819753.1|STER_0241|p gi|Glucose-6-phosphate isomerase [Streptococcus thermophilus LMD-9]_hit-name:pgi _hit-score:890_hit-evalue:0.0_identity-percent:100		49.7	149	4	1	1
b46	b46.a2	b46.a2.a1	gi|116627134|ref|YP_819753.1|STER_0241|p gi|Glucose-6-phosphate isomerase [Streptococcus thermophilus LMD-9]_hit-name:pgi _hit-score:890_hit-evalue:0.0_identity-percent:100		49.7	303 304 308 309	1	1	1
b47	b47.a1	b47.a1.a1	gi|116627082|ref|YP_819701.1|STER_0162|Molecular chaperone GrpE (heat shock protein) [Streptococcus thermophilus LMD-9]_hit-name:grpE _hit-score:252_hit-evalue:3e-69_identity-percent:91.4893617021277		23.3	44 46 47 54	3	1	1
b47	b47.a2	b47.a2.a1	gi|116627082|ref|YP_819701.1|STER_0162|Molecular chaperone GrpE (heat shock protein) [Streptococcus thermophilus LMD-9]_hit-name:grpE _hit-score:252_hit-evalue:3e-69_identity-percent:91.4893617021277		23.3	2	2	1	1
b48	b48.a1	b48.a1.a1	gi|116628116|ref|YP_820735.1|STER_1366|Beta-galactosidase [Streptococcus thermophilus LMD-9]_hit-name:lacZ _hit-score:2081_hit-evalue:0.0_identity-percent:98.5380116959064		116.8	38	5	1	1
b49	b49.a1	b49.a1.a1	gi|116627484|ref|YP_820103.1|STER_0644|Peptidoglycan interpeptide bridge formation enzyme [Streptococcus thermophilus LMD-9]_hit-name:murN _hit-score:815_hit-evalue:0.0_identity-percent:99.0267639902676		47.1	120 121	5	1	1
b50	b50.a1	b50.a1.a1	gi|116627168|ref|YP_819787.1|STER_0280|Cell division initiation protein [Streptococcus thermophilus LMD-9]_hit-name:divIVA _hit-score:44_hit-evalue:9e-07_identity-percent:40		12.3	70 72 74 75 81	4	1	1
b51	b51.a1	b51.a1.a1	gi|116627945|ref|YP_820564.1|STER_1178|hypothetical protein STER_1178 [Streptococcus thermophilus LMD-9]_hit-name:obg _hit-score:27_hit-evalue:0.29_identity-percent:26.4367816091954		30.2	235 244	3	1	1
b51	b51.a2	b51.a2.a1	gi|116627945|ref|YP_820564.1|STER_1178|hypothetical protein STER_1178 [Streptococcus thermophilus LMD-9]_hit-name:obg _hit-score:27_hit-evalue:0.29_identity-percent:26.4367816091954		30.2	13	1	1	1
b52	b52.a1	b52.a1.a1	gi|116627672|ref|YP_820291.1|STER_0856|Uncharacterized ABC-type transport system, periplasmic component/surface lipoprotein [Streptococcus thermophilus LMD-9]_hit-name:ileS _hit-score:26_hit-evalue:1.1_identity-percent:21.6216216216216		37.5	325 326	4	1	1
b53	b53.a1	b53.a1.a1	gi|116628435|ref|YP_821054.1|STER_1715|Translation elongation factor P (EF-P)/translation initiation factor 5A (eIF-5A) [Streptococcus thermophilus LMD-9]_hit-name:efp _hit-score:328_hit-evalue:3e-92_identity-percent:90.8602150537634		20.6	145 147 149	4	1	1
b54	b54.a1	b54.a1.a1	gi|116628119|ref|YP_820738.1|STER_1369|UDP-glucose 4-epimerase [Streptococcus thermophilus LMD-9]_hit-name:galE1 _hit-score:674_hit-evalue:0.0_identity-percent:99.3993993993994		36.7	152 157 161	3	1	1
b55	b55.a1	b55.a1.a1	gi|116627463|ref|YP_820082.1|STER_0618|Predicted membrane protein, hemolysin III homolog [Streptococcus thermophilus LMD-9]_hit-name:hlyIII _hit-score:428_hit-evalue:1e-122_identity-percent:94.6666666666667		24.8	9	3	1	1
b56	b56.a1	b56.a1.a1	gi|116627556|ref|YP_820175.1|STER_0723|hypothetical protein STER_0723 [Streptococcus thermophilus LMD-9]_hit-name:sthII _hit-score:20_hit-evalue:6.6_identity-percent:25.7142857142857		11.3	22 23 25	3	3	1
b57	b57.a1	b57.a1.a1	gi|116628347|ref|YP_820966.1|STER_1623|Carbonic anhydrase [Streptococcus thermophilus LMD-9]_hit-name:cah _hit-score:498_hit-evalue:1e-143_identity-percent:93.0769230769231		29.1	35 42 55	3	2	1
b58	b58.a1	b58.a1.a1	gi|116627350|ref|YP_819969.1|STER_0492|Parvulin-like peptidyl-prolyl isomerase [Streptococcus thermophilus LMD-9]_hit-name:prtM _hit-score:506_hit-evalue:1e-145_identity-percent:89.0728476821192		41	10 11 14	3	1	1
b59	b59.a1	b59.a1.a1	gi|116628576|ref|YP_821195.1|STER_1885|infA|Translation initiation factor 1 [Streptococcus thermophilus LMD-9]_hit-name:tnp1239 _hit-score:26_hit-evalue:0.096_identity-percent:35.7142857142857		8.2	60	3	1	1
b60	b60.a1	b60.a1.a1	gi|116628639|ref|YP_821258.1|STER_1953|rpmF|Ribosomal protein L32 [Streptococcus thermophilus LMD-9]_hit-name:rpmF _hit-score:123_hit-evalue:6e-31_identity-percent:100		6.7	23 26 32 33	3	1	1
b61	b61.a1	b61.a1.a1	gi|116626992|ref|YP_819611.1|STER_0042|Surface antigen [Streptococcus thermophilus LMD-9]_hit-name:pcsB _hit-score:192_hit-evalue:7e-51_identity-percent:80.8695652173913		46.4	27 29 34 39 43	3	1	1
b62	b62.a1	b62.a1.a1	gi|116627774|ref|YP_820393.1|STER_0981|pyrE|Orotate phosphoribosyltransferase [Streptococcus thermophilus LMD-9]_hit-name:pyrE _hit-score:408_hit-evalue:1e-116_identity-percent:99.5215311004785		22.7	2	3	1	1
b63	b63.a1	b63.a1.a1	gi|116627487|ref|YP_820106.1|STER_0648|ATP-binding subunit of Clp protease and DnaK/DnaJ chaperones [Streptococcus thermophilus LMD-9]_hit-name:clpE _hit-score:1377_hit-evalue:0.0_identity-percent:94.1489361702128		83.6	53	3	1	1
b64	b64.a1	b64.a1.a1	gi|116627803|ref|YP_820422.1|STER_1016|Glucan phosphorylase [Streptococcus thermophilus LMD-9]_hit-name:glgP _hit-score:1439_hit-evalue:0.0_identity-percent:95.8885941644562		86.3	3	3	1	1
b65	b65.a1	b65.a1.a1	gi|116628176|ref|YP_820795.1|STER_1437|Glycosyltransferase [Streptococcus thermophilus LMD-9]_hit-name:rgpA _hit-score:666_hit-evalue:0.0_identity-percent:81.9371727748691		43.9	16	3	1	1
b66	b66.a1	b66.a1.a1	gi|116628243|ref|YP_820862.1|STER_1513|ligA|NAD-dependent DNA ligase [Streptococcus thermophilus LMD-9]_hit-name:ligA _hit-score:1229_hit-evalue:0.0_identity-percent:97.5308641975309		71.3	173	2	1	1
b67	b67.a1	b67.a1.a1	gi|116628655|ref|YP_821274.1|STER_1973|rpsD|Ribosomal protein S4 [Streptococcus thermophilus LMD-9]_hit-name:rpsD _hit-score:401_hit-evalue:1e-114_identity-percent:100		23	31	2	1	1
b68	b68.a1	b68.a1.a1	gi|116627887|ref|YP_820506.1|STER_1117|ABC-type polar amino acid transport system, ATPase component [Streptococcus thermophilus LMD-9]_hit-name:gnlQ _hit-score:266_hit-evalue:2e-73_identity-percent:54.9586776859504		28	248	2	1	1
b69	b69.a1	b69.a1.a1	gi|116627450|ref|YP_820069.1|STER_0605|hypothetical protein STER_0605 [Streptococcus thermophilus LMD-9]_NOHIT		10.4	7	2	1	1
b70	b70.a1	b70.a1.a1	gi|116628232|ref|YP_820851.1|STER_1500|neopullulanase [Streptococcus thermophilus LMD-9]_hit-name:amyL _hit-score:1028_hit-evalue:0.0_identity-percent:100		56	421	2	1	1
b71	b71.a1	b71.a1.a1	gi|116627533|ref|YP_820152.1|STER_0698|Transcriptional regulator [Streptococcus thermophilus LMD-9]_hit-name:epsA _hit-score:57_hit-evalue:6e-10_identity-percent:27.6018099547511		54.1	88	2	1	1
b72	b72.a1	b72.a1.a1	gi|116627477|ref|YP_820096.1|STER_0633|DNA topoisomerase IV subunit B [Streptococcus thermophilus LMD-9]_hit-name:parE _hit-score:1157_hit-evalue:0.0_identity-percent:90.9090909090909		71.8	11	2	1	1
b73	b73.a1	b73.a1.a1	gi|116627229|ref|YP_819848.1|STER_0349|Transketolase [Streptococcus thermophilus LMD-9]_hit-name:tkt _hit-score:1313_hit-evalue:0.0_identity-percent:99.6960486322188		71.2	36 37	2	1	1
b74	b74.a1	b74.a1.a1	gi|116628346|ref|YP_820965.1|STER_1622|Pyruvate-formate lyase [Streptococcus thermophilus LMD-9]_hit-name:pfl _hit-score:1562_hit-evalue:0.0_identity-percent:100		86.9	54	1	1	1
b75	b75.a1	b75.a1.a1	gi|116627675|ref|YP_820294.1|STER_0859|Uncharacterized ABC-type transport system, permease component [Streptococcus thermophilus LMD-9]_hit-name:livH _hit-score:45_hit-evalue:2e-06_identity-percent:26.8181818181818		33.7	314	1	1	1
b76	b76.a1	b76.a1.a1	gi|116627136|ref|YP_819755.1|STER_0243|Preprotein translocase subunit YajC [Streptococcus thermophilus LMD-9]_hit-name:yajC _hit-score:185_hit-evalue:2e-49_identity-percent:89.2857142857143		12.2	88 89 91	1	1	1
b77	b77.a1	b77.a1.a1	gi|116628571|ref|YP_821190.1|STER_1880|rplQ|Ribosomal protein L17 [Streptococcus thermophilus LMD-9]_hit-name:rplQ _hit-score:246_hit-evalue:7e-68_identity-percent:100		14.4	74 75 79 82 83 84 85 86	1	1	1
b78	b78.a1	b78.a1.a1	gi|116627964|ref|YP_820583.1|STER_1197|cell division membrane protein [Streptococcus thermophilus LMD-9]_hit-name:rodA _hit-score:777_hit-evalue:0.0_identity-percent:86.1052631578947		52.5	450 452	1	1	1
b79	b79.a1	b79.a1.a1	gi|116627316|ref|YP_819935.1|STER_0455|rplU|Ribosomal protein L21 [Streptococcus thermophilus LMD-9]_hit-name:rplU _hit-score:172_hit-evalue:1e-45_identity-percent:86.5384615384615		11.1	2	1	1	1
b80	b80.a1	b80.a1.a1	gi|116628646|ref|YP_821265.1|STER_1962|hypothetical protein STER_1962 [Streptococcus thermophilus LMD-9]_hit-name:grpE _hit-score:24_hit-evalue:1.4_identity-percent:36.3636363636364		20.3	59	1	1	1
b81	b81.a1	b81.a1.a1	gi|116627233|ref|YP_819852.1|STER_0353|Predicted metal-binding, possibly nucleic acid-binding protein [Streptococcus thermophilus LMD-9]_hit-name:alaS _hit-score:26_hit-evalue:0.45_identity-percent:38.8888888888889		19.9	136	1	1	1
b82	b82.a1	b82.a1.a1	gi|116628281|ref|YP_820900.1|STER_1552|trpD|Anthranilate phosphoribosyltransferase [Streptococcus thermophilus LMD-9]_hit-name:trpD _hit-score:640_hit-evalue:0.0_identity-percent:99.4011976047904		35.9	15	1	1	1
b83	b83.a1	b83.a1.a1	gi|116627988|ref|YP_820607.1|STER_1222|dTDP-D-glucose 4,6-dehydratase [Streptococcus thermophilus LMD-9]_hit-name:rmlB _hit-score:720_hit-evalue:0.0_identity-percent:100		39.1	178 184	1	1	1
b84	b84.a1	b84.a1.a1	gi|116627334|ref|YP_819953.1|STER_0475|frr|Ribosome recycling factor [Streptococcus thermophilus LMD-9]_hit-name:frr _hit-score:351_hit-evalue:5e-99_identity-percent:99.4594594594595		20.5	96	1	1	1
b85	b85.a1	b85.a1.a1	gi|116628595|ref|YP_821214.1|STER_1904|rplB|Ribosomal protein L2 [Streptococcus thermophilus LMD-9]_hit-name:rplB _hit-score:557_hit-evalue:1e-161_identity-percent:100		29.9	201	1	1	1
b86	b86.a1	b86.a1.a1	gi|116627090|ref|YP_819709.1|STER_0191|tig|FKBP-type peptidyl-prolyl cis-trans isomerase (trigger factor) [Streptococcus thermophilus LMD-9]_hit-name:tig _hit-score:737_hit-evalue:0.0_identity-percent:90.632318501171		46.6	97	1	1	1
b87	b87.a1	b87.a1.a1	gi|116627481|ref|YP_820100.1|STER_0639|rpsA|Ribosomal protein S1 [Streptococcus thermophilus LMD-9]_hit-name:rpsA _hit-score:694_hit-evalue:0.0_identity-percent:92		43.8	324	1	1	1
b88	b88.a1	b88.a1.a1	gi|116628423|ref|YP_821042.1|STER_1703|3-deoxy-D-arabino-heptulosonate 7-phosphate (DAHP) synthase [Streptococcus thermophilus LMD-9]_hit-name:aroG1 _hit-score:687_hit-evalue:0.0_identity-percent:99.7084548104956		38.6	55 56	1	1	1
b89	b89.a1	b89.a1.a1	gi|116628582|ref|YP_821201.1|STER_1891|rplR|Ribosomal protein L18 [Streptococcus thermophilus LMD-9]_hit-name:rplR _hit-score:227_hit-evalue:4e-62_identity-percent:98.3050847457627		12.8	89	1	1	1
b90	b90.a1	b90.a1.a1	gi|116628593|ref|YP_821212.1|STER_1902|rplV|Ribosomal protein L22 [Streptococcus thermophilus LMD-9]_hit-name:rplV _hit-score:218_hit-evalue:3e-59_identity-percent:100		12.3	57	1	1	1
b91	b91.a1	b91.a1.a1	gi|116628586|ref|YP_821205.1|STER_1895|rplE|Ribosomal protein L5 [Streptococcus thermophilus LMD-9]_hit-name:rplE _hit-score:320_hit-evalue:9e-90_identity-percent:91.6666666666667		19.7	23 24 25	1	1	1
b92	b92.a1	b92.a1.a1	gi|116628674|ref|YP_821293.1|STER_1992|IMP dehydrogenase/GMP reductase [Streptococcus thermophilus LMD-9]_hit-name:guaB _hit-score:923_hit-evalue:0.0_identity-percent:96.551724137931		52.8	367 372	1	1	1
b93	b93.a1	b93.a1.a1	gi|116628546|ref|YP_821165.1|STER_1844|DNA-directed RNA polymerase, beta' subunit/160 kD subunit [Streptococcus thermophilus LMD-9]_hit-name:rpoC _hit-score:2248_hit-evalue:0.0_identity-percent:96.1312026913373		135.1	1000 1005	1	1	1
b94	b94.a1	b94.a1.a1	gi|116628468|ref|YP_821087.1|STER_1751|Glutamine synthetase [Streptococcus thermophilus LMD-9]_hit-name:tnp1239 _hit-score:_hit-evalue:9.6_identity-percent:35.1351351351351		50	393	1	1	1
b95	b95.a1	b95.a1.a1	gi|116627599|ref|YP_820218.1|STER_0771|Predicted membrane GTPase involved in stress response [Streptococcus thermophilus LMD-9]_hit-name:typA _hit-score:1145_hit-evalue:0.0_identity-percent:95.7723577235772		68.5	425	1	1	1
b96	b96.a1	b96.a1.a1	gi|116628161|ref|YP_820780.1|STER_1422|ppnK|NAD kinase [Streptococcus thermophilus LMD-9]_hit-name:ppnK _hit-score:521_hit-evalue:1e-150_identity-percent:97.7611940298508		29.8	51 56 70	1	1	1
b97	b97.a1	b97.a1.a1	gi|116627686|ref|YP_820305.1|STER_0872|Enzyme related to GTP cyclohydrolase I [Streptococcus thermophilus LMD-9]_hit-name:punA _hit-score:24_hit-evalue:1.5_identity-percent:29.7872340425532		19.1	11 15 18	1	1	1
b98	b98.a1	b98.a1.a1	gi|116626997|ref|YP_819616.1|STER_0048|Acyl carrier protein [Streptococcus thermophilus LMD-9]_hit-name:acpP1 _hit-score:154_hit-evalue:2e-40_identity-percent:98.7654320987654		9.4	26 29	1	1	1
b99	b99.a1	b99.a1.a1	gi|116627300|ref|YP_819919.1|STER_0435|Biotin carboxyl carrier protein [Streptococcus thermophilus LMD-9]_hit-name:accB _hit-score:211_hit-evalue:4e-57_identity-percent:72.8395061728395		16.9	48 54 55	1	1	1
c100	c100.a1	c100.a1.a1	gi|116627957|ref|YP_820576.1|STER_1190|Adenine/guanine|Rev|Rev|reversed phosphoribosyltransferase or related PRPP-binding protein [Streptococcus thermophilus LMD-9]_hit-name:apt _hit-score:346_hit-evalue:1e-97_identity-percent:100		18.6	128 130 138 139 140	1	1	1
c101	c101.a1	c101.a1.a1	gi|116628583|ref|YP_821202.1|STER_1892|rplF|Ribosomal protein L6P/L9E [Streptococcus thermophilus LMD-9]_hit-name:rplF _hit-score:353_hit-evalue:1e-99_identity-percent:100		19.4	127 129	1	1	1
c102	c102.a1	c102.a1.a1	gi|116628118|ref|YP_820737.1|STER_1368|aldose 1-epimerase [Streptococcus thermophilus LMD-9]_hit-name:galM _hit-score:707_hit-evalue:0.0_identity-percent:100		38.9	30 31 33 34 37	1	1	1
c103	c103.a1	c103.a1.a1	gi|116627277|ref|YP_819896.1|STER_0401|ABC-type branched-chain amino acid transport system, ATPase component [Streptococcus thermophilus LMD-9]_hit-name:livG _hit-score:488_hit-evalue:1e-140_identity-percent:99.2125984251969		27.8	10	1	1	1
c104	c104.a1	c104.a1.a1	gi|116627327|ref|YP_819946.1|STER_0467|Glutamate dehydrogenase/leucine dehydrogenase [Streptococcus thermophilus LMD-9]_hit-name:gdhA _hit-score:893_hit-evalue:0.0_identity-percent:100		48.2	265 266	1	1	1
c105	c105.a1	c105.a1.a1	gi|116627620|ref|YP_820239.1|STER_0793|prfA|Protein chain release factor A [Streptococcus thermophilus LMD-9]_hit-name:prfA _hit-score:653_hit-evalue:0.0_identity-percent:94.4289693593315		40.6	14 22	1	1	1
c106	c106.a1	c106.a1.a1	gi|116627554|ref|YP_820173.1|STER_0721|Uncharacterized protein containing a divergent version of the methyl-accepting chemotaxis-like domain [Streptococcus thermophilus LMD-9]_hit-name:pepB _hit-score:22_hit-evalue:4.0_identity-percent:28.5714285714286		14	84 86	1	1	1

## Sheet: phosphopeptides
		This tab displays details about each identified phosphopeptides. A phosphopeptide is a merge of identified peptides including phosphorylations and sharing the same unique sequenceLI + M H + mass modification.
		WARNING The sequenceLI stands for a peptide sequence in which all Leucines are converted into Isoleucines
Informations Table
Group ID	Group ID of this phosphopeptide
Sub-Group ID	Sub-Group of this phosphopeptide (it regroups overlapping peptide sequences)
Phosphopeptide ID	Phosphopeptide identifier
SequenceLI	Phosphopeptide sequence
Modifs	Modification mass
Number of phosphorylations (phosphosites)	number of phosphorylation sites in this peptide sequence (observed by the identification engine)
Best Position in sequence	The phosphosites position that gives the best peptide E-value
All positions	List of all possible phosphosite positions (observed by the identification engine)
Charges	List of all possible peptides charges (observed by the identification engine)
MH+ theo	Theoretical M H + of this phosphopeptide
Number of spectra		Number of spectra identifying this phosphopeptide
Group ID	Sub-group ID	Phosphopeptide ID	SequenceLI	Modifs	Number of phosphorylations (phosphosites)	Best Position in sequence	All positions	Charges	MH+ theo	Number of spectra
a1	a1.a1	pepa1a1a1	VDMTVDKYGSYGSYGSYGEYGK	164.06	1	13	10 11 13 14 16	2 3	2590.11	9
a1	a1.a1	pepa1a1a2	VDMTVDKYGSYGSYGSYGEYGK	176.136	1	16	10 11 14 16 17 20	3	2602.19	8
a1	a1.a1	pepa1a1a3	VDMTVDKYGSYGSYGSYGEYGK	180.055	1	11	11	3	2606.1	1
a1	a1.a1	pepa1a1a4	VDMTVDKYGSYGSYGSYGEYGK	188.193	1	14	10 11 14 16	3	2614.24	4
a1	a1.a1	pepa1a1a5	VDMTVDKYGSYGSYGSYGEYGK	244.027	2	8 14	8 10 11 13 14 17 20	3	2670.08	8
a1	a1.a1	pepa1a1a6	VDMTVDKYGSYGSYGSYGEYGK	256.102	2	10 16	8 10 11 13 14 16 17	3	2682.15	3
a1	a1.a1	pepa1a1a7	VDMTVDKYGSYGSYGSYGEYGK	268.159	2	8 14	4 8 10 11 13 14 16 17	3	2694.21	3
a1	a1.a1	pepa1a1a8	VDMTVDKYGSYGSYGSYGEYGK	272.097	2	4 20	4 8 10 11 13 20	3	2698.15	1
a1	a1.a1	pepa1a1a9	VDMTVDKYGSYGSYGSYGEYGKK	192.092	1	14	14 20	3	2746.24	3
a1	a1.a1	pepa1a1b10	VDMTVDKYGSYGSYGSYGEYGKK	208.086	1	20	20	3	2762.23	1
a1	a1.a1	pepa1a1b11	VDMTVDKYGSYGSYGSYGEYGKK	208.192	1	16	4 8 10 11 13 14 16 17 20	3	2762.34	6
a1	a1.a1	pepa1a1b12	VDMTVDKYGSYGSYGSYGEYGKK	224.269	1	20	8 10 11 13 16 17 20	3	2778.41	10
a1	a1.a1	pepa1a1b13	VDMTVDKYGSYGSYGSYGEYGKK	272.058	2	8 16	4 8 10 11 13 14 16 17 20	3	2826.2	13
a1	a1.a1	pepa1a1b14	VDMTVDKYGSYGSYGSYGEYGKK	288.158	2	10 20	8 10 11 16 17 20	3	2842.3	6
a1	a1.a1	pepa1a1b15	VDMTVDKYGSYGSYGSYGEYGKK	304.235	2	8 20	8 10 11 13 14 20	3	2858.38	1
a1	a1.a1	pepa1a1b16	VDMTVDKYGSYGSYGSYGEYGKK	352.024	3	4 8 17	4 8 10 11 13 14 17 20	3	2906.17	4
a1	a1.a1	pepa1a1b17	VDMTVDKYGSYGSYGSYGEYGKK	368.125	3	10 16 20	4 8 10 11 13 14 16 17 20	3	2922.27	6
a1	a1.a1	pepa1a1b18	YGSYGSYGSYGEYGK	136.029	1	10	6 7 9 10 13	2	1773.7	17
a1	a1.a1	pepa1a1b19	YGSYGSYGSYGEYGK	144.079	1	13	4 6 9 10 13	2	1781.76	22
a1	a1.a1	pepa1a1b20	YGSYGSYGSYGEYGK	152.118	1	1	1 6 7 9 10 13	2	1789.79	22
a1	a1.a1	pepa1a1b21	YGSYGSYGSYGEYGK	215.995	2	7 10	1 4 6 7 10 13	2	1853.67	8
a1	a1.a1	pepa1a1b22	YGSYGSYGSYGEYGK	224.045	2	7 10	4 6 7 10 13	2	1861.72	6
a1	a1.a1	pepa1a1b23	YGSYGSYGSYGEYGK	232.084	2	7 10	3 4 6 7 10 13	2	1869.76	8
a1	a1.a1	pepa1a1b24	YGSYGSYGSYGEYGKK	164.06	1	13	7 9 10 13	2 3	1929.83	32
a1	a1.a1	pepa1a1b25	YGSYGSYGSYGEYGKK	176.136	1	13	6 7 10 13	2 3	1941.91	31
a1	a1.a1	pepa1a1b26	YGSYGSYGSYGEYGKK	188.193	1	10	7 9 10 13	2 3	1953.96	26
a1	a1.a1	pepa1a1b27	YGSYGSYGSYGEYGKK	244.027	2	7 13	4 6 7 9 10 13	2 3	2009.8	13
a1	a1.a1	pepa1a1b28	YGSYGSYGSYGEYGKK	256.102	2	7 13	4 7 9 10 13	2 3	2021.87	10
a1	a1.a1	pepa1a1b29	YGSYGSYGSYGEYGKK	268.159	2	4 13	4 6 7 9 10 13	2 3	2033.93	7
a1	a1.a1	pepa1a1b30	YGSYGSYGSYGEYGKKSDQK	304.235	2	9 10	9 10 13	3	2528.22	1
a2	a2.a1	pepa2a1a1	NINETQTFK	136.029	1	5	5	2	1230.58	15
a2	a2.a1	pepa2a1a2	NINETQTFK	144.079	1	5	5	2	1238.63	18
a2	a2.a1	pepa2a1a3	NINETQTFK	152.118	1	5	5	2	1246.67	9
a2	a2.a1	pepa2a1a4	NINETQTFKINISE	136.029	1	5	5	2	1786.86	19
a2	a2.a1	pepa2a1a5	NINETQTFKINISE	144.079	1	5	5	2	1794.91	14
a2	a2.a1	pepa2a1a6	NINETQTFKINISE	152.118	1	5	5	2	1802.95	9
a2	a2.a2	pepa2a2a7	QFTPDEMAEIQR	112.023	1	3	3	2	1576.7	2
a2	a2.a2	pepa2a2a8	VIDEHVPDSNDAASFDATR	107.998	1	18	9 14 18	2 3	2166.93	15
a2	a2.a2	pepa2a2a9	VIDEHVPDSNDAASFDATR	112.023	1	18	14 18	2 3	2170.96	12
a2	a2.a2	pepa2a2b10	VIDEHVPDSNDAASFDATR	116.042	1	18	9 14 18	2 3	2174.98	18
a2	a2.a2	pepa2a2b11	VIDEHVPDSNDAASFDATRQFTPDEMAEIQR	107.998	1	9	9 14 18	3	3612.59	3
a2	a2.a2	pepa2a2b12	VIDEHVPDSNDAASFDATRQFTPDEMAEIQR	112.023	1	9	9 14 18	3	3616.62	1
a2	a2.a2	pepa2a2b13	VIDEHVPDSNDAASFDATRQFTPDEMAEIQR	116.042	1	22	14 18 22	3	3620.64	2
a2	a2.a2	pepa2a2b14	VIDEHVPDSNDAASFDATRQFTPDEMAEIQR	128.018	1	9	9	3	3632.62	1
a2	a2.a2	pepa2a2b15	VIDEHVPDSNDAASFDATRQFTPDEMAEIQR	132.037	1	9	9 14 18	3	3636.63	1
a3	a3.a1	pepa3a1a2	DKTQNSYEESQEIDFQDAK	164.06	1	10	10	3	2439.06	1
a3	a3.a1	pepa3a1a3	DKTQNSYEESQEIDFQDAK	176.136	1	10	10	3	2451.14	1
a3	a3.a1	pepa3a1a7	EDKTQNSYEESQEIDFQDAK	164.06	1	11	11	3	2568.1	2
a3	a3.a1	pepa3a1a8	EDKTQNSYEESQEIDFQDAK	176.136	1	11	11	3	2580.18	2
a3	a3.a1	pepa3a1a9	EDKTQNSYEESQEIDFQDAK	188.193	1	11	11	3	2592.24	3
a3	a3.a1	pepa3a1b10	EESQEIDFQDAK	152.118	1	3	3	2	1590.75	2
a3	a3.a1	pepa3a1b16	KTQNSYEESQEIDFQDAK	164.06	1	9	9	3	2324.03	6
a3	a3.a1	pepa3a1b17	KTQNSYEESQEIDFQDAK	176.136	1	9	6 9	2 3	2336.11	3
a3	a3.a1	pepa3a1b18	KTQNSYEESQEIDFQDAK	188.193	1	9	9	2 3	2348.17	5
a3	a3.a1	pepa3a1b19	QNSYEESQEIDFQDAK	152.118	1	3	3 4 7	2	2082.95	1
a3	a3.a1	pepa3a1b23	SEDKTQNSYEESQEIDFQDAK	176.136	1	12	12	3	2667.21	2
a3	a3.a1	pepa3a1b24	SEDKTQNSYEESQEIDFQDAK	188.193	1	12	12	3	2679.27	1
a3	a3.a1	pepa3a1b25	TQNSYEESQEIDFQDAK	136.029	1	8	8	2 3	2167.91	13
a3	a3.a1	pepa3a1b26	TQNSYEESQEIDFQDAK	144.079	1	8	8	2 3	2175.96	8
a3	a3.a1	pepa3a1b27	TQNSYEESQEIDFQDAK	152.118	1	8	8	2 3	2184	9
a3	a3.a1	pepa3a1b28	YEESQEIDFQDAK	136.029	1	4	4	2	1737.73	8
a3	a3.a1	pepa3a1b29	YEESQEIDFQDAK	144.079	1	4	4	2	1745.78	2
a3	a3.a2	pepa3a2b11	IEADGDTSPIDAFIQK	144.079	1	8	8	3	1863.92	1
a3	a3.a2	pepa3a2b12	IEADGDTSPIDAFIQK	152.118	1	7	7	2	1871.96	3
a3	a3.a2	pepa3a2b13	KIEADGDTSPIDAFIQK	164.06	1	8	8 9	2 3	2012	24
a3	a3.a2	pepa3a2b14	KIEADGDTSPIDAFIQK	176.136	1	8	8 9	2 3	2024.07	14
a3	a3.a2	pepa3a2b15	KIEADGDTSPIDAFIQK	188.193	1	8	8 9	2 3	2036.13	11
a3	a3.a3	pepa3a3a4	EAEINAGVTETDSIIDK	136.029	1	9	9 11	2	1940.91	2
a3	a3.a3	pepa3a3a5	EAEINAGVTETDSIIDK	144.079	1	9	9 11	2	1948.96	3
a3	a3.a3	pepa3a3a6	EAEINAGVTETDSIIDK	152.118	1	9	9	2	1957	1
a3	a3.a4	pepa3a4b20	QRQEFADSGIIGQTIANESTNSTTADETVTPITSGFGTTETK	136.029	1	8	8	3	4540.12	1
a3	a3.a4	pepa3a4b21	QRQEFADSGIIGQTIANESTNSTTADETVTPITSGFGTTETK	144.079	1	33	14 19 20 22 23 24 28 33	3	4548.18	3
a3	a3.a4	pepa3a4b22	QRQEFADSGIIGQTIANESTNSTTADETVTPITSGFGTTETK	152.118	1	8	8 19 20 22 23 24	3	4556.21	2
a3	a3.a5	pepa3a5a1	ASEPQASKPIIEDVEVSETIDSEAIATTVAGVTGVK	188.193	1	17	17 19	3	3830.06	1
a4	a4.a1	pepa4a1a1	APAAPATDPGMMGY	107.998	1	14	14	2	1457.58	17
a4	a4.a1	pepa4a1a2	APAAPATDPGMMGY	112.023	1	14	14	2	1461.61	8
a4	a4.a1	pepa4a1a3	APAAPATDPGMMGY	116.042	1	14	7 14	2	1465.63	25
a4	a4.a1	pepa4a1a4	APAAPATDPGMMGY	123.993	1	14	14	2	1473.58	2
a4	a4.a1	pepa4a1a5	APAAPATDPGMMGY	128.018	1	14	14	2	1477.6	3
a4	a4.a1	pepa4a1a6	APAAPATDPGMMGY	132.037	1	14	14	2	1481.62	15
a4	a4.a1	pepa4a1a7	APAAPATDPGMMGY	139.987	1	14	14	2	1489.57	5
a4	a4.a1	pepa4a1a8	APAAPATDPGMMGY	144.013	1	14	14	2	1493.6	4
a4	a4.a1	pepa4a1a9	APAAPATDPGMMGY	148.032	1	14	14	2	1497.62	9
a4	a4.a2	pepa4a2b18	SQIETTTSEFDREK	136.029	1	7	6 7 8	2	1806.82	3
a4	a4.a2	pepa4a2b19	SQIETTTSEFDREK	144.079	1	6	6	2	1814.87	2
a4	a4.a2	pepa4a2b20	SQIETTTSEFDREK	152.118	1	1	1 6	2	1822.9	3
a4	a4.a2	pepa4a2b27	VNIIKSQIETTTSEFDREK	188.193	1	6	6	3	2426.35	1
a4	a4.a3	pepa4a3b23	TSRPIIIIADDVAGEAIPTIVINK	136.029	1	1	1 2	3	2655.47	1
a4	a4.a3	pepa4a3b24	TSRPIIIIADDVAGEAIPTIVINK	144.079	1	1	1 2	3	2663.52	4
a4	a4.a3	pepa4a3b25	TSRPIIIIADDVAGEAIPTIVINK	152.118	1	1	1 2	3	2671.56	3
a4	a4.a4	pepa4a4b21	TNDIAGDGTTTATVITQAIVR	112.023	1	9	9 10 11	3	2230.13	2
a4	a4.a4	pepa4a4b22	TNDIAGDGTTTATVITQAIVR	116.042	1	9	9 10 11	3	2234.15	1
a4	a4.a5	pepa4a5b10	DATMESIGQASK	152.118	1	6	6 11	2	1389.69	2
a4	a4.a6	pepa4a6b12	IRGTFNVVAVK	144.079	1	4	4	3	1347.8	1
a4	a4.a6	pepa4a6b13	IRGTFNVVAVK	152.118	1	4	4	2	1355.84	1
a4	a4.a7	pepa4a7b14	ISGGVAVIK	144.079	1	2	2	2	987.609	1
a4	a4.a7	pepa4a7b15	ISGGVAVIK	152.118	1	2	2	2	995.648	1
a4	a4.a8	pepa4a8b11	EAIAQVAAVSSR	116.042	1	10	10	2	1317.7	1
a4	a4.a9	pepa4a9b26	VGNDGVITIEESR	112.023	1	8	8 12	2	1500.72	1
a4	a4.b10	pepa4b10b28	VTVDKDSTVIVEGAGSAEAIANR	232.084	2	2 7	2 7	3	2534.27	1
a4	a4.b11	pepa4b11b16	QIAYNAGYEGSVIIDK	144.079	1	8	8 11	2	1884.96	1
a4	a4.b12	pepa4b12b17	SAIQNAASVASIIITTEAVVADKPEQK	188.193	1	8	8 11	3	2942.68	1
a5	a5.a1	pepa5a1a2	YASIDDSVIPDAENIK	136.029	1	7	1 3 7	2 3	1885.88	28
a5	a5.a1	pepa5a1a3	YASIDDSVIPDAENIK	144.079	1	7	1 3 7	2 3	1893.93	26
a5	a5.a1	pepa5a1a4	YASIDDSVIPDAENIK	152.118	1	3	3 7	2 3	1901.97	15
a5	a5.a1	pepa5a1a5	YASIDDSVIPDAENIKVTIER	136.029	1	7	7	3	2484.23	1
a5	a5.a1	pepa5a1a6	YASIDDSVIPDAENIKVTIER	144.079	1	7	7	3	2492.28	1
a5	a5.a1	pepa5a1a7	YASIDDSVIPDAENIKVTIER	152.118	1	7	7	3	2500.32	3
a5	a5.a2	pepa5a2a1	HYGGITGK	152.118	1	2	2	2	984.549	1
a6	a6.a1	pepa6a1a7	TIVFNTNHDIIDGTETVISGASCTTNCIAPMAK	266.067	1	19	19 22 24 25	3	3703.71	2
a6	a6.a1	pepa6a1a8	TIVFNTNHDIIDGTETVISGASCTTNCIAPMAK	266.16	1	22	22 24 25	3	3703.8	1
a6	a6.a1	pepa6a1a9	TIVFNTNHDIIDGTETVISGASCTTNCIAPMAK	274.117	1	19	19 22 24 25	3	3711.76	3
a6	a6.a1	pepa6a1b10	TIVFNTNHDIIDGTETVISGASCTTNCIAPMAK	330.038	2	19 22	16 19 22 24 25	3	3767.68	9
a6	a6.a1	pepa6a1b11	TIVFNTNHDIIDGTETVISGASCTTNCIAPMAK	338.088	2	19 22	14 16 19 22 24 25	3	3775.73	15
a6	a6.a1	pepa6a1b12	TIVFNTNHDIIDGTETVISGASCTTNCIAPMAK	346.033	2	19 22	19 22 24 25	3	3783.67	2
a6	a6.a1	pepa6a1b13	TIVFNTNHDIIDGTETVISGASCTTNCIAPMAK	346.127	2	19 22	14 16 19 22 24 25	3	3783.77	3
a6	a6.a1	pepa6a1b14	TIVFNTNHDIIDGTETVISGASCTTNCIAPMAK	354.083	2	19 22	16 19 22 24 25	3	3791.72	6
a6	a6.a1	pepa6a1b15	TIVFNTNHDIIDGTETVISGASCTTNCIAPMAK	362.122	2	19 22	19 22 24 25	3	3799.76	1
a6	a6.a2	pepa6a2a4	AGAANIVPNSTGAAK	136.029	1	10	10	2	1477.74	5
a6	a6.a2	pepa6a2a5	AGAANIVPNSTGAAK	144.079	1	10	10	2	1485.79	7
a6	a6.a2	pepa6a2a6	AGAANIVPNSTGAAK	152.118	1	10	10	2	1493.83	7
a6	a6.a3	pepa6a3a1	AATNESYGYTEDPIVSSDIVGMSYGSIFDATQTK	144.079	1	16	3 6 7 9 16 17 23 24	3	3761.73	4
a6	a6.a3	pepa6a3a2	AATNESYGYTEDPIVSSDIVGMSYGSIFDATQTK	152.118	1	16	3 6 7 9 16 17 23	3	3769.77	4
a6	a6.a3	pepa6a3a3	AATNESYGYTEDPIVSSDIVGMSYGSIFDATQTK	168.112	1	16	16 17 23 24	3	3785.76	1
a7	a7.a1	pepa7a1a1	VDSVSSVGPEK	152.118	1	5	5	2	1255.68	1
a7	a7.a1	pepa7a1a3	VVFDDMTDTK	144.079	1	9	9	2	1314.61	2
a7	a7.a1	pepa7a1a4	VVFDDMTDTK	160.074	1	9	9	2	1330.61	1
a7	a7.a1	pepa7a1a5	VVFDDMTDTKTIPK	164.06	1	9	7 9	2 3	1773.87	6
a7	a7.a1	pepa7a1a6	VVFDDMTDTKTIPK	176.136	1	9	7 9	2 3	1785.95	9
a7	a7.a1	pepa7a1a7	VVFDDMTDTKTIPK	180.055	1	7	7 9	2	1789.87	2
a7	a7.a1	pepa7a1a8	VVFDDMTDTKTIPK	188.193	1	9	9	2 3	1798.01	8
a7	a7.a1	pepa7a1a9	VVFDDMTDTKTIPK	192.13	1	9	9	2 3	1801.95	4
a7	a7.a1	pepa7a1b10	VVFDDMTDTKTIPK	204.188	1	9	7 9	2 3	1814	5
a7	a7.a1	pepa7a1b11	VVFDDMTDTKTIPKVDSVSSVGPEK	208.192	1	7	7 9	3	2902.55	2
a7	a7.a1	pepa7a1b12	VVFDDMTDTKTIPKVDSVSSVGPEK	224.269	1	9	7 9 11	3	2918.62	2
a7	a7.a2	pepa7a2a2	VTDFGIAVAFAETSITQTNSMIGSVHYISPEQAR	116.042	1	14	14 16 18 20 24	3	3756.84	1
a8	a8.a1	pepa8a1a1	TENASAGVMISASHNPAIDNGIK	136.029	1	13	11 13	2 3	2433.15	11
a8	a8.a1	pepa8a1a2	TENASAGVMISASHNPAIDNGIK	144.079	1	13	11 13	2 3	2441.2	8
a8	a8.a1	pepa8a1a3	TENASAGVMISASHNPAIDNGIK	152.024	1	11	11 13	2 3	2449.14	4
a8	a8.a1	pepa8a1a4	TENASAGVMISASHNPAIDNGIK	152.118	1	11	11 13	2 3	2449.24	11
a8	a8.a1	pepa8a1a5	TENASAGVMISASHNPAIDNGIK	160.074	1	11	11 13	2 3	2457.19	5
a8	a8.a1	pepa8a1a6	TENASAGVMISASHNPAIDNGIK	168.112	1	13	11 13	2 3	2465.23	4
a9	a9.a1	pepa9a1a1	AEKFVQAARDNGYAVGGFNTNNIEWTQAIIR	266.056	2	13 20	13 20	3	3719.79	1
a9	a9.a1	pepa9a1a2	AEKFVQAARDNGYAVGGFNTNNIEWTQAIIR	274.094	2	13 20	13 20	3	3727.82	1
a9	a9.a1	pepa9a1a3	ARDNGYAVGGFNTNNIEWTQAIIR	107.998	1	6	6	3	2788.32	4
a9	a9.a1	pepa9a1a4	ARDNGYAVGGFNTNNIEWTQAIIR	112.023	1	6	6 13	3	2792.35	2
a9	a9.a1	pepa9a1a5	ARDNGYAVGGFNTNNIEWTQAIIR	116.042	1	6	6 13	3	2796.36	6
a9	a9.a1	pepa9a1a6	EKFVQAARDNGYAVGGFNTNNIEWTQAIIR	274.094	2	12 19	12 19	3	3656.79	1
a9	a9.a1	pepa9a1a8	NGYAVGGFNTNNIEWTQAIIR	116.042	1	3	3 10	2 3	2454.2	3
a9	a9.a1	pepa9a1a9	NGYAVGGFNTNNIEWTQAIIR	150.008	1	3	3	2	2488.17	1
a9	a9.a1	pepa9a1b10	NGYAVGGFNTNNIEWTQAIIR	158.052	1	3	3 10	3	2496.21	5
a9	a9.a1	pepa9a1b11	SAEKFVQAARDNGYAVGGFNTNNIEWTQAIIR	194.128	1	1	1 14	3	3734.89	5
a9	a9.a2	pepa9a2b12	VNVNTECQIAFANATR	165.019	1	5	5	2	1915.87	2
a9	a9.a2	pepa9a2b13	VNVNTECQIAFANATR	169.044	1	5	5	2	1919.9	4
a9	a9.a2	pepa9a2b14	VNVNTECQIAFANATR	173.063	1	5	5	2 3	1923.92	3
a9	a9.a3	pepa9a3a7	ITEAVPGFPIVIHGGSGIPDDQIQEAIK	152.118	1	16	16	3	3053.65	4
b10	b10.a1	pepb10a1a2	VQGAFFNSGQYQMIFGTGTVNK	136.029	1	8	8 11 17	2 3	2530.18	15
b10	b10.a1	pepb10a1a3	VQGAFFNSGQYQMIFGTGTVNK	144.079	1	17	8 17	2 3	2538.23	8
b10	b10.a1	pepb10a1a4	VQGAFFNSGQYQMIFGTGTVNK	152.024	1	8	8	3	2546.18	1
b10	b10.a1	pepb10a1a5	VQGAFFNSGQYQMIFGTGTVNK	152.118	1	8	8 11 17	3	2546.27	14
b10	b10.a1	pepb10a1a6	VQGAFFNSGQYQMIFGTGTVNK	168.112	1	8	8 11	3	2562.27	2
b10	b10.a2	pepb10a2a1	PINAIITAAMTAQAGATIAVGVK	152.024	1	17	17	3	2334.25	1
b11	b11.a1	pepb11a1a1	GASHETTKTAEVIAVGEGTR	136.029	1	3	3 6 7 9	3	2150.05	1
b11	b11.a1	pepb11a1a2	TASGFVIAGASHETTK	136.029	1	3	3	2	1712.83	7
b11	b11.a1	pepb11a1a3	TASGFVIAGASHETTK	144.079	1	3	3 11 14 15	2 3	1720.88	19
b11	b11.a1	pepb11a1a4	TASGFVIAGASHETTK	152.118	1	11	3 11	2 3	1728.91	7
b11	b11.a2	pepb11a2a5	TITGEIIAPSVAVGDK	144.079	1	10	10	2	1714.95	1
b11	b11.a2	pepb11a2a6	TITGEIIAPSVAVGDK	152.118	1	10	10	2	1722.99	1
b12	b12.a1	pepb12a1a5	DYASIDAAPEER	107.998	1	4	4	2	1444.6	4
b12	b12.a1	pepb12a1a6	DYASIDAAPEER	112.023	1	4	2 4	2	1448.62	6
b12	b12.a1	pepb12a1a7	DYASIDAAPEER	116.042	1	4	4	2	1452.64	4
b12	b12.a1	pepb12a1b10	VNTPKDYASIDAAPEER	232.084	2	3 7	3 7	3	2107.99	1
b12	b12.a2	pepb12a2a1	DIISEYDFPGDDIPVIQGSAIK	136.029	1	6	6 19	2	2528.22	2
b12	b12.a2	pepb12a2a2	DIISEYDFPGDDIPVIQGSAIK	144.079	1	6	4 6 19	2 3	2536.27	10
b12	b12.a2	pepb12a2a3	DIISEYDFPGDDIPVIQGSAIK	152.118	1	6	6	3	2544.31	2
b12	b12.a3	pepb12a3a4	DTDKPIIIPVEDVFSITGR	152.118	1	15	15 17	3	2267.25	2
b12	b12.a4	pepb12a4a8	GITINTAHVEYETEK	144.079	1	3	3	2	1848.92	1
b12	b12.a5	pepb12a5a9	VDHGKTTITAAITTVIAR	178.039	1	6	6	3	2046.1	1
b13	b13.a1	pepb13a1a1	ITTSIIQEMVQAAATR	107.998	1	4	3 4	2	1840.92	5
b13	b13.a1	pepb13a1a2	ITTSIIQEMVQAAATR	112.023	1	3	2 3 4	2 3	1844.95	6
b13	b13.a1	pepb13a1a3	ITTSIIQEMVQAAATR	116.042	1	4	2 3 4	2 3	1848.97	6
b13	b13.a1	pepb13a1a4	SKITTSIIQEMVQAAATR	136.029	1	1	1 4 5 6	3	2084.08	7
b13	b13.a1	pepb13a1a5	SKITTSIIQEMVQAAATR	144.079	1	1	1 4	3	2092.13	3
b13	b13.a1	pepb13a1a6	SKITTSIIQEMVQAAATR	152.118	1	1	1 4 5 6	2 3	2100.17	3
b14	b14.a1	pepb14a1a1	EAGYTAVVSHRSGETEDSTIADIAVATNAGQIK	152.118	1	9	9 12	3	3513.77	1
b14	b14.a1	pepb14a1a6	SGETEDSTIADIAVATNAGQIK	136.029	1	1	1 4 7 8	2 3	2327.1	9
b14	b14.a1	pepb14a1a7	SGETEDSTIADIAVATNAGQIK	144.079	1	4	1 4 7 8	2 3	2335.15	5
b14	b14.a1	pepb14a1a8	SGETEDSTIADIAVATNAGQIK	152.118	1	1	1 4 7 8	2 3	2343.19	3
b14	b14.a2	pepb14a2a5	MSIITDVYAR	132.037	1	2	2	2	1300.64	6
b14	b14.a3	pepb14a3a2	GMVPSGASTGEHEAVEIR	107.998	1	5	5 8 9	3	1934.87	1
b14	b14.a3	pepb14a3a3	GMVPSGASTGEHEAVEIR	112.023	1	5	5 8	2	1938.89	2
b14	b14.a3	pepb14a3a4	GMVPSGASTGEHEAVEIR	116.042	1	5	5 8 9	2	1942.91	2
b15	b15.a1	pepb15a1a1	DIQQEAIEKYATSVDIDGK	164.06	1	10	10 12	3	2287.11	1
b15	b15.a1	pepb15a1a2	DIQQEAIEKYATSVDIDGK	188.193	1	12	12	3	2311.24	1
b15	b15.a1	pepb15a1a5	YATSVDIDGK	136.029	1	3	3	2	1204.55	9
b15	b15.a1	pepb15a1a6	YATSVDIDGK	144.079	1	3	3	2	1212.6	4
b15	b15.a1	pepb15a1a7	YATSVDIDGK	152.118	1	1	1 3	2	1220.64	8
b15	b15.a2	pepb15a2a3	KEDIIDTKVPMSR	176.136	1	7	7	2	1707.95	1
b15	b15.a2	pepb15a2a4	KEDIIDTKVPMSR	188.193	1	7	7	2	1720.01	2
b16	b16.a1	pepb16a1a1	FTDETVRFNINDGDKNEISNTITNVYR	232.084	2	2 5	2 5	3	3407.61	3
b16	b16.a1	pepb16a1a2	GFTDETVR	107.998	1	6	6	2	1032.44	3
b16	b16.a1	pepb16a1a3	GFTDETVR	112.023	1	6	6	2	1036.47	2
b16	b16.a1	pepb16a1a4	GFTDETVR	116.042	1	6	6	2	1040.48	6
b16	b16.a1	pepb16a1a5	GFTDETVRFNINDGDK	144.079	1	6	6	2 3	1971.93	3
b16	b16.a1	pepb16a1a6	GFTDETVRFNINDGDK	152.118	1	6	6	3	1979.97	2
b16	b16.a1	pepb16a1a7	GFTDETVRFNINDGDKNEISNTITNVYR	152.118	1	6	3 6	3	3384.67	3
b16	b16.a1	pepb16a1a8	GFTDETVRFNINDGDKNEISNTITNVYR	186.09	1	3	3 6	3	3418.64	1
b17	b17.a1	pepb17a1a3	DFHIVAETGIHAR	107.998	1	8	8	3	1573.75	1
b17	b17.a1	pepb17a1a4	DFHIVAETGIHAR	112.023	1	8	8	2 3	1577.78	6
b17	b17.a1	pepb17a1a5	DFHIVAETGIHAR	116.042	1	8	8	2 3	1581.8	12
b17	b17.a2	pepb17a2a1	AVNIKSIMGVM	136.029	1	6	6	2	1298.66	1
b17	b17.a2	pepb17a2a2	AVNIKSIMGVMSIGVGQGADVTISAEGPDADDAIAAIAETMTK	164.06	1	6	6	3	4382.16	1
b17	b17.a2	pepb17a2a7	SIMGVMSIGVGQGADVTISAEGPDADDAIAAIAETMTK	152.118	1	17	17 19	3	3844.89	1
b17	b17.a3	pepb17a3a6	FASDITIEYK	144.079	1	3	3	2	1330.68	1
b18	b18.a1	pepb18a1a5	EASIIEINDIVK	144.079	1	3	3	2	1487.82	8
b18	b18.a1	pepb18a1a6	EASIIEINDIVK	152.118	1	3	3	2	1495.86	2
b18	b18.a2	pepb18a2a1	AIVDGAPSVIK	144.079	1	8	8	2	1213.7	1
b18	b18.a2	pepb18a2a2	AIVDGAPSVIKEGVSAAEAEEIK	164.06	1	8	8 15	3	2447.27	1
b18	b18.a2	pepb18a2a7	EGVSAAEAEEIK	144.079	1	4	4	2	1376.68	1
b18	b18.a2	pepb18a2a8	EGVSAAEAEEIK	152.118	1	4	4	2	1384.72	4
b18	b18.a3	pepb18a3a3	DSFDVEITSAGDK	144.079	1	2	2 9	2	1527.71	2
b18	b18.a3	pepb18a3a4	DSFDVEITSAGDK	152.118	1	8	8 9	2	1535.75	2
b19	b19.a1	pepb19a1a1	IPVENTVEVPQPVDGENHEQK	136.029	1	6	6	3	2494.19	6
b19	b19.a1	pepb19a1a2	IPVENTVEVPQPVDGENHEQK	144.079	1	6	6	3	2502.24	4
b19	b19.a1	pepb19a1a3	IPVENTVEVPQPVDGENHEQK	152.118	1	6	6	3	2510.28	3
b19	b19.a1	pepb19a1a4	VTPQPNRIPVENTVEVPQPVDGENHEQK	136.029	1	13	13	3	3286.61	3
b19	b19.a1	pepb19a1a5	VTPQPNRIPVENTVEVPQPVDGENHEQK	144.079	1	13	13	3	3294.66	3
b19	b19.a1	pepb19a1a6	VTPQPNRIPVENTVEVPQPVDGENHEQK	152.118	1	13	13	3	3302.7	1
b20	b20.a1	pepb20a1a1	QIINDYEETHASTIAVMPVSSEEVSAYGVIAPQGK	136.029	1	20	20 21	3	3869.86	5
b20	b20.a1	pepb20a1a2	QIINDYEETHASTIAVMPVSSEEVSAYGVIAPQGK	144.079	1	20	20 21	3	3877.91	6
b20	b20.a1	pepb20a1a3	QIINDYEETHASTIAVMPVSSEEVSAYGVIAPQGK	151.086	1	20	20 21	3	3884.91	1
b20	b20.a1	pepb20a1a4	QIINDYEETHASTIAVMPVSSEEVSAYGVIAPQGK	152.118	1	20	20 21	3	3885.95	6
b20	b20.a1	pepb20a1a5	QIINDYEETHASTIAVMPVSSEEVSAYGVIAPQGK	168.112	1	6	6 9 12 13 20 21	3	3901.94	1
b21	b21.a1	pepb21a1a1	NPQTGETISIAASK	136.029	1	9	9	2	1552.76	5
b21	b21.a1	pepb21a1a2	NPQTGETISIAASK	144.079	1	9	9	2	1560.81	7
b21	b21.a1	pepb21a1a3	NPQTGETISIAASK	152.118	1	9	9	2	1568.85	5
b22	b22.a1	pepb22a1a4	NISIPQETEIIK	136.029	1	8	8	2	1520.8	6
b22	b22.a1	pepb22a1a5	NISIPQETEIIK	144.079	1	8	8	2	1528.85	4
b22	b22.a1	pepb22a1a6	NISIPQETEIIK	152.118	1	8	8	2	1536.89	2
b22	b22.a2	pepb22a2a2	HNEYSESAEDSISFK	144.079	1	11	11	2	1886.83	1
b22	b22.a2	pepb22a2a3	HNEYSESAEDSISFK	152.118	1	11	11	2 3	1894.87	2
b22	b22.a3	pepb22a3a1	EAIYTNPK	144.079	1	4	4	2	1079.56	2
b23	b23.a1	pepb23a1a1	IANDEESIMAFVQAMK	136.029	1	7	7	3	1932.89	7
b23	b23.a1	pepb23a1a2	IANDEESIMAFVQAMK	144.079	1	7	7	3	1940.94	5
b23	b23.a1	pepb23a1a3	IANDEESIMAFVQAMK	152.118	1	7	7	3	1948.97	5
b24	b24.a1	pepb24a1a1	KDTSDSSSNQSTVVIK	268.159	2	3 4	3 4	2	1964	16
b25	b25.a1	pepb25a1a7	NTTIPTSK	136.029	1	3	3	2	997.497	5
b25	b25.a1	pepb25a1a8	NTTIPTSK	144.079	1	3	3	2	1005.55	1
b25	b25.a1	pepb25a1a9	NTTIPTSK	152.118	1	3	3	2	1013.59	1
b25	b25.a2	pepb25a2a4	IYEQAAAAQQAQAGAEGAQATDNSGDDVVDGEFTEK	136.029	1	21	21 24	3	3791.66	1
b25	b25.a2	pepb25a2a5	IYEQAAAAQQAQAGAEGAQATDNSGDDVVDGEFTEK	144.079	1	21	21 24	3	3799.71	1
b25	b25.a2	pepb25a2a6	IYEQAAAAQQAQAGAEGAQATDNSGDDVVDGEFTEK	152.118	1	21	21 24	3	3807.75	2
b25	b25.a3	pepb25a3a1	EQTIVIQSNSGITDEEIER	107.998	1	8	8 10	2	2269.06	1
b25	b25.a3	pepb25a3a2	EQTIVIQSNSGITDEEIER	112.023	1	8	8 10	2	2273.09	1
b25	b25.a3	pepb25a3a3	EQTIVIQSNSGITDEEIER	116.042	1	8	8 10	2	2277.1	1
b25	b25.a4	pepb25a4b11	VTKAVITVPAYFNDAQR	232.084	2	2 7	2 7	3	2125.11	1
b25	b25.a5	pepb25a5b10	QAISDAGISISDIDEVIIVGGSTR	107.998	1	4	4 9 11	3	2524.25	1
b26	b26.a1	pepb26a1a1	FQAAAGQIDQTAR	107.998	1	11	11	2	1484.69	5
b26	b26.a1	pepb26a1a2	FQAAAGQIDQTAR	112.023	1	11	11	2	1488.71	4
b26	b26.a1	pepb26a1a3	FQAAAGQIDQTAR	116.042	1	11	11	2	1492.73	4
b26	b26.a2	pepb26a2a4	GISQEEIAK	144.079	1	3	3	2	1118.59	2
b27	b27.a1	pepb27a1a4	FSVATSENEVK	136.029	1	5	2 5 6	2	1346.62	5
b27	b27.a1	pepb27a1a5	FSVATSENEVK	144.079	1	5	5	2	1354.67	2
b27	b27.a1	pepb27a1a6	FSVATSENEVK	152.118	1	5	5 6	2	1362.71	1
b27	b27.a2	pepb27a2a1	ANVVSIVTPTTGYIVDISSVNDEHFASGSMGK	136.029	1	8	8 10 11 13 18 19	3	3431.64	3
b27	b27.a2	pepb27a2a2	ANVVSIVTPTTGYIVDISSVNDEHFASGSMGK	144.079	1	10	10 11 13 18 19	3	3439.7	1
b27	b27.a2	pepb27a2a3	ANVVSIVTPTTGYIVDISSVNDEHFASGSMGK	152.118	1	10	8 10 11 13 18 19	3	3447.73	2
b27	b27.a3	pepb27a3a7	NGIDDTVIVTVTNSEK	152.118	1	6	6	3	1856.98	1
b28	b28.a1	pepb28a1a1	IDAAIAASQDEISVIREK	136.029	1	13	8 13	2 3	2065.06	6
b28	b28.a1	pepb28a1a2	IDAAIAASQDEISVIREK	144.079	1	13	8 13	2	2073.11	6
b28	b28.a1	pepb28a1a3	IDAAIAASQDEISVIREK	152.118	1	13	8 13	2	2081.15	2
b29	b29.a1	pepb29a1a1	ASADEIQAIIDEAWKNPEFQEASK	188.193	1	23	23	3	2878.49	12
b29	b29.a1	pepb29a1a3	MKASADEIQAIIDEAWKNPEFQEASK	224.269	1	25	25	3	3173.7	1
b29	b29.a2	pepb29a2a2	AVGDAIDISHAIPFTSPK	152.118	1	9	9	3	1991.08	1
b30	b30.a1	pepb30a1a1	MTTENIGEIVIAPR	166.003	1	2	2 3	2	1709.82	6
b30	b30.a1	pepb30a1a2	MTTENIGEIVIAPR	170.028	1	2	2 3	2	1713.84	7
b31	b31.a1	pepb31a1a1	SDVQKTQVIR	136.029	1	6	6	2	1309.69	5
b31	b31.a1	pepb31a1a2	SDVQKTQVIR	144.079	1	6	6	2	1317.74	4
b31	b31.a1	pepb31a1a3	SDVQKTQVIR	152.118	1	6	6	2	1325.78	3
b32	b32.a1	pepb32a1a3	MAESIAGQK	144.079	1	4	4	2	1078.55	1
b32	b32.a1	pepb32a1a4	MAESIAGQK	152.118	1	4	4	2	1086.58	5
b32	b32.a2	pepb32a2a1	IIVAITESGNTAR	112.023	1	8	8	2	1456.77	1
b32	b32.a2	pepb32a2a2	IIVAITESGNTAR	116.042	1	8	6 8 11	2	1460.79	3
b32	b32.a3	pepb32a3a5	VAIESGIVESGDNIVIVAGIPVGSGNTNTMR	107.998	1	10	10	3	3177.59	1
b32	b32.a3	pepb32a3a6	VAIESGIVESGDNIVIVAGIPVGSGNTNTMR	112.023	1	10	10	3	3181.61	1
b33	b33.a1	pepb33a1a3	SFSFDSASVQGAVIK	136.029	1	3	1 3 6	2	1678.81	7
b33	b33.a1	pepb33a1a4	SFSFDSASVQGAVIK	144.079	1	6	6	2	1686.86	2
b33	b33.a2	pepb33a2a1	KVTTAPSQSSVPNQQVAQEQQR	144.079	1	9	7 9 10	3	2555.31	2
b33	b33.a2	pepb33a2a2	KVTTAPSQSSVPNQQVAQEQQR	152.118	1	7	7 9 10	3	2563.35	1
b34	b34.a1	pepb34a1a1	DNIVQAIEEGISQTQEIENQNEK	136.029	1	12	12 14	3	2765.29	5
b34	b34.a1	pepb34a1a2	DNIVQAIEEGISQTQEIENQNEK	144.079	1	12	12 14	3	2773.34	1
b34	b34.a1	pepb34a1a3	DNIVQAIEEGISQTQEIENQNEK	152.118	1	12	12 14	3	2781.38	1
b34	b34.a1	pepb34a1a4	RDNIVQAIEEGISQTQEIENQNEK	144.079	1	15	15	3	2929.44	3
b34	b34.a1	pepb34a1a5	RDNIVQAIEEGISQTQEIENQNEK	152.118	1	13	13 15	3	2937.48	2
b35	b35.a1	pepb35a1a1	GYAQNNPIVEYQSESFK	136.029	1	2	2	2	2109.95	2
b35	b35.a1	pepb35a1a2	GYAQNNPIVEYQSESFK	144.079	1	2	2	2	2118	4
b35	b35.a1	pepb35a1a3	GYAQNNPIVEYQSESFK	152.118	1	2	2	3	2126.04	1
b35	b35.a2	pepb35a2a4	VSTTATGNIQAHQADANGQEIDFSK	144.079	1	6	3 4 6	3	2747.31	2
b35	b35.a2	pepb35a2a5	VSTTATGNIQAHQADANGQEIDFSK	152.118	1	6	4 6	3	2755.35	2
b36	b36.a1	pepb36a1a1	KPVEETSVPVGHK	164.06	1	6	6 7	3	1570.82	6
b36	b36.a1	pepb36a1a2	KPVEETSVPVGHK	176.136	1	6	6 7	3	1582.9	3
b36	b36.a1	pepb36a1a3	KPVEETSVPVGHK	188.193	1	6	6 7	3	1594.96	1
b37	b37.a1	pepb37a1a1	SFIDKGEIVPDEVTNGIVK	164.06	1	1	1	3	2224.15	1
b37	b37.a1	pepb37a1a2	SFIDKGEIVPDEVTNGIVK	176.136	1	1	1	3	2236.23	3
b37	b37.a1	pepb37a1a3	SFIDKGEIVPDEVTNGIVK	188.193	1	1	1	3	2248.28	6
b38	b38.a1	pepb38a1a1	IGETHEGASQMDWMEQEQER	107.998	1	4	4 9	3	2499	2
b38	b38.a1	pepb38a1a2	IGETHEGASQMDWMEQEQER	112.023	1	4	4 9	3	2503.02	3
b38	b38.a1	pepb38a1a3	IGETHEGASQMDWMEQEQER	116.042	1	4	4	3	2507.04	4
b39	b39.a1	pepb39a1a1	EIVHIGIEDNNFDSDINPIETTGAYISPK	136.029	1	21	21 22	3	3337.59	4
b39	b39.a1	pepb39a1a2	EIVHIGIEDNNFDSDINPIETTGAYISPK	144.079	1	21	21 22	3	3345.64	2
b39	b39.a1	pepb39a1a3	EIVHIGIEDNNFDSDINPIETTGAYISPK	152.118	1	21	21 22	3	3353.68	3
b40	b40.a1	pepb40a1a1	FDSIITDNGATVVESK	136.029	1	3	3	2	1831.87	2
b40	b40.a1	pepb40a1a2	FDSIITDNGATVVESK	144.079	1	3	3	2	1839.92	6
b41	b41.a1	pepb41a1a1	TGTVTMDVAK	136.029	1	5	5	2	1158.55	1
b41	b41.a1	pepb41a1a2	TGTVTMDVAK	144.079	1	5	5	2	1166.6	1
b41	b41.a1	pepb41a1a3	TGTVTMDVAK	152.118	1	5	5	2	1174.64	4
b42	b42.a1	pepb42a1a1	HSNETVEFEGETYPIIR	107.998	1	5	5	2 3	2128.96	2
b42	b42.a1	pepb42a1a2	HSNETVEFEGETYPIIR	112.023	1	2	2 5	3	2132.98	1
b42	b42.a1	pepb42a1a3	HSNETVEFEGETYPIIR	116.042	1	5	5	3	2137	1
b42	b42.a2	pepb42a2a4	VEISSDSHPFYTGR	112.023	1	4	4	2	1706.77	2
b43	b43.a1	pepb43a1a1	MNTDETITIYDVAR	166.003	1	3	3	2	1807.78	4
b43	b43.a1	pepb43a1a2	MNTDETITIYDVAR	170.028	1	3	3	2	1811.81	2
b44	b44.a1	pepb44a1a2	TGKIPGNQGEAVNPTQQHGPK	176.136	1	1	1	3	2334.24	3
b44	b44.a2	pepb44a2a1	IIGTTAGYVGYDDNSNTITER	112.023	1	4	4 5 11 15	2	2372.1	2
b45	b45.a1	pepb45a1a1	SQIDFDTNTITEK	144.079	1	7	7 9	2	1655.8	2
b45	b45.a1	pepb45a1a2	SQIDFDTNTITEK	152.118	1	7	7 9	2	1663.84	2
b45	b45.a2	pepb45a2a3	YMNEKPVAK	188.193	1	1	1	2	1267.75	1
b46	b46.a1	pepb46a1a2	SGTTTEPAIAFR	107.998	1	4	4	2	1358.64	1
b46	b46.a1	pepb46a1a3	SGTTTEPAIAFR	112.023	1	4	4	2	1362.66	1
b46	b46.a1	pepb46a1a4	SGTTTEPAIAFR	116.042	1	4	4	2	1366.68	2
b46	b46.a2	pepb46a2a1	QIAGESEGKDQRGIYPTSANFSTDIHSIGQFIQEGTR	119.002	1	17	17 18 22 23	3	4156.96	1
b47	b47.a1	pepb47a1a1	ATETTEEVVEETKETSEIEEAQAR	186.09	1	2	2 4 5 12	3	2895.35	3
b47	b47.a2	pepb47a2a2	MTEDIKEEEVKEEEATETTEEVVEETK	250.097	1	2	2	3	3434.54	2
b48	b48.a1	pepb48a1a1	YFESIEEFSEGEMK	144.079	1	9	9	2	1868.82	2
b48	b48.a1	pepb48a1a2	YFESIEEFSEGEMK	152.118	1	9	9	2	1876.85	3
b49	b49.a1	pepb49a1a1	ANGAIEIVIKPYDTYQIFDSNGEPISSEQK	164.06	1	26	26 27	3	3490.7	2
b49	b49.a1	pepb49a1a2	ANGAIEIVIKPYDTYQIFDSNGEPISSEQK	176.136	1	26	26 27	3	3502.78	2
b49	b49.a1	pepb49a1a3	ANGAIEIVIKPYDTYQIFDSNGEPISSEQK	188.193	1	26	26 27	3	3514.84	1
b50	b50.a1	pepb50a1a1	VTSASASRPAYASATSEPSHATGNIASASNYDIIK	136.029	1	22	15 16 22	3	3631.73	3
b50	b50.a1	pepb50a1a2	VTSASASRPAYASATSEPSHATGNIASASNYDIIK	152.118	1	11	11 13 15 16	3	3647.82	1
b51	b51.a1	pepb51a1a2	VAEIGVSYAGTPVIAHEIASK	144.079	1	20	11 20	3	2256.21	3
b51	b51.a2	pepb51a2a1	TIEPEIVEK	194.128	1	1	1	2	1251.71	1
b52	b52.a1	pepb52a1a1	DGGVDIVTSSIPSDIKDAVVK	164.06	1	8	8 9	3	2279.18	1
b52	b52.a1	pepb52a1a2	DGGVDIVTSSIPSDIKDAVVK	176.136	1	8	8	3	2291.25	1
b52	b52.a1	pepb52a1a3	DGGVDIVTSSIPSDIKDAVVK	188.193	1	8	8	3	2303.31	2
b53	b53.a1	pepb53a1a1	GATVTGSGKPATIETGIVVNVPDFIEAGQK	176.136	1	3	3 5 7	3	3132.7	1
b53	b53.a1	pepb53a1a2	GATVTGSGKPATIETGIVVNVPDFIEAGQK	188.193	1	3	3 5 7	3	3144.76	3
b54	b54.a1	pepb54a1a1	IMMETIMKWSDQAYGIK	348.126	3	5 10 14	5 10 14	2	2393.12	3
b55	b55.a1	pepb55a1a1	SNTATFNTSQNIK	136.029	1	8	8	2	1561.73	2
b55	b55.a1	pepb55a1a2	SNTATFNTSQNIK	144.079	1	8	8	2	1569.78	1
b56	b56.a1	pepb56a1a1	FEIERRQTTNYQDDQGINSNSIK	337.972	3	8 9 11	8 9 11	3	3094.3	1
b56	b56.a1	pepb56a1a2	QTTNYQDDQGINSNSIK	136.029	1	3	3 5	2	2061.91	1
b56	b56.a1	pepb56a1a3	TTNYQDDQGINSNSIK	144.079	1	1	1 2 4	2	1941.91	1
b57	b57.a1	pepb57a1a1	EHWGDISKDYEISK	230.204	1	7	7	2	1937.01	2
b57	b57.a1	pepb57a1a2	KSQEVQWGYTGITGPEHWGDISK	268.159	2	2 9	2 9	3	2871.41	1
b58	b58.a1	pepb58a1a1	AKENENIESTEETVEEVVADKDTEQEQINR	176.136	1	10	10 13	3	3652.75	1
b58	b58.a1	pepb58a1a2	AKENENIESTEETVEEVVADKDTEQEQINR	188.193	1	9	9 10 13	3	3664.81	2
b59	b59.a1	pepb59a1a1	VTVEMSPYDITR	112.023	1	8	8	2	1522.72	1
b59	b59.a1	pepb59a1a2	VTVEMSPYDITR	116.042	1	8	8	2	1526.74	2
b60	b60.a1	pepb60a1a1	ITAPSVQFDETTGDYSR	112.023	1	5	5	2	1998.9	1
b60	b60.a1	pepb60a1a2	ITAPSVQFDETTGDYSR	116.042	1	2	2 11 12	2	2002.92	2
b61	b61.a1	pepb61a1a1	DYDSQIAATNNAISNIASQQEAAQAQVATIQSQVSTIR	158.052	1	2	2 4 9 14 18	3	4164.03	3
b62	b62.a1	pepb62a1a1	MTIASQIASDIIDIK	160.074	1	2	2	2	1778.95	3
b63	b63.a1	pepb63a1a1	DPENPINQFNQAGGSNFFDDFFSDINNFR	116.042	1	15	15	3	3482.51	3
b64	b64.a1	pepb64a1a1	MFTFTNYVESK	194.034	1	3	3	2	1560.67	3
b65	b65.a1	pepb65a1a1	GIPAQYGGFETFVDQIVSNR	107.998	1	6	6	3	2306.09	1
b65	b65.a1	pepb65a1a2	GIPAQYGGFETFVDQIVSNR	116.042	1	6	6	3	2314.13	2
b66	b66.a1	pepb66a1a1	INTQRQENGEAEFANPR	116.042	1	3	3	3	2089.98	2
b67	b67.a1	pepb67a1a1	YVPGQHGPNNR	158.052	1	1	1	2	1396.66	2
b68	b68.a1	pepb68a1a1	FISNIINHHSDKVSVDA	136.029	1	10	10	2	2031.99	1
b68	b68.a1	pepb68a1a2	FISNIINHHSDKVSVDA	152.118	1	10	10	2	2048.08	1
b69	b69.a1	pepb69a1a1	SKPIITDDVIEQAK	176.136	1	6	6	2	1732.99	2
b70	b70.a1	pepb70a1a1	SGNEDCTPIAVTISNDAANNK	201.101	1	7	7	2 3	2335.07	2
b71	b71.a1	pepb71a1a1	SNYYQEPDYEDVNQITEEGIPVYR	112.023	1	16	16	3	3033.33	1
b71	b71.a1	pepb71a1a2	SNYYQEPDYEDVNQITEEGIPVYR	116.042	1	16	16	3	3037.35	1
b72	b72.a1	pepb72a1a1	INVNNYNDDAIQVIEGIDAVR	158.052	1	6	6	2	2503.23	2
b73	b73.a1	pepb73a1a1	VDAINQSNSGHPGVVMGAAPMGYTIFTRQ	181.998	1	23	23 24	3	3200.45	2
b74	b74.a1	pepb74a1a1	PYDGDESFIAGPTERSIK	194.128	1	16	16	3	2176.08	1
b75	b75.a1	pepb75a1a1	ADGVNYIK	152.118	1	6	6	2	1031.57	1
b76	b76.a1	pepb76a1a1	VITPAPSTETAETVK	144.079	1	7	7 8 10	2	1687.9	1
b77	b77.a1	pepb77a1a1	NEIASESYDEATDKYTSTTAIQK	176.136	1	7	7 8 12 15 16 17 18 19	3	2741.32	1
b78	b78.a1	pepb78a1a1	IRQTISQIMPSIHQGK	144.079	1	4	4 6	3	1981.09	1
b79	b79.a1	pepb79a1a1	MSTYAIIK	168.112	1	2	2	2	1094.61	1
b80	b80.a1	pepb80a1a1	IINTDNVASGVNVEVGKK	188.193	1	9	9	3	2045.2	1
b81	b81.a1	pepb81a1a1	VITPEEESGQISISGK	144.079	1	8	8	2	1817.94	1
b82	b82.a1	pepb82a1a1	DISQDQVQAVFDR	112.023	1	3	3	2	1632.76	1
b83	b83.a1	pepb83a1a1	AWVRSFGVKATISNCSNNYGPYQHIEK	245.215	1	5	5 11	3	3314.72	1
b84	b84.a1	pepb84a1a1	AINESDIGINPANDGSVIR	107.998	1	16	16	2	2062.98	1
b85	b85.a1	pepb85a1a1	ATIGTVGNEQQSIINIGK	144.079	1	12	12	2	1987.07	1
b86	b86.a1	pepb86a1a1	SIGKGQDWTITAEVVTKPEVK	224.269	1	1	1	3	2510.5	1
b87	b87.a1	pepb87a1a1	DVISVGQDVTVK	144.079	1	4	4	2	1403.76	1
b88	b88.a1	pepb88a1a1	IVIGPCSSDNEKAVIDYAHR	289.105	2	7 8	7 8	3	2476.19	1
b89	b89.a1	pepb89a1a1	GISEVVFDR	112.023	1	3	3	2	1133.55	1
b90	b90.a1	pepb90a1a1	TINSAIANAENNFGIEK	144.079	1	4	4	2	1949.98	1
b91	b91.a1	pepb91a1a1	FNYSSVMAVPK	144.079	1	3	3 4 5	2	1386.7	1
b92	b92.a1	pepb92a1a1	AIAAGGNAVMIGSMFAGTDEAPGETEIFQGR	191.989	2	13 18	13 18	3	3260.44	1
b93	b93.a1	pepb93a1a1	VFVQGKTGMGEYVVPFTARMK	260.021	2	7 12	7 12	3	2605.24	1
b94	b94.a1	pepb94a1a1	EAGIIDIPSTIR	116.042	1	9	9	2	1400.76	1
b95	b95.a1	pepb95a1a1	VQIDTPEEYQGSIIQAISER	116.042	1	18	18	3	2392.18	1
b96	b96.a1	pepb96a1a1	VISIGGDGMIISAFHMYEKEIARVRFVGIHTGHIGF	290.089	2	12 17	12 17 31	3	4248.15	1
b97	b97.a1	pepb97a1a1	KNITIIGSKETPYIFEYSPQVIESFDNR	256.102	2	4 11	4 8 11	3	3544.78	1
b98	b98.a1	pepb98a1a1	ITEATKINDIGVDSIEIMEFIINIEDEFSIE	136.029	1	2	2 5	3	3676.78	1
b99	b99.a1	pepb99a1a1	NQTSSVTTSPVAPTVEVVASSPQVPVAPVAAPAAV	271.955	3	14 20 21	14 20 21	3	3600.72	1
c100	c100.a1	pepc100a1a1	DTAYQVIERIAYSYANGDAMIPSIDR	132.037	1	2	2 4 12 13 14	3	3064.45	1
c101	c101.a1	pepc101a1a1	SHQDEVEAPEGITFEVPSATSIVVSGINK	152.118	1	18	18 20	3	3192.63	1
c102	c102.a1	pepc102a1a1	VISTITTGATIQEFIVPTETGAIK	152.118	1	3	3 4 6 7 10	3	2642.49	1
c103	c103.a1	pepc103a1a1	TKNFGGITAVGDVSMEINEGEIVGIIGPNGAGK	230.204	1	1	1	3	3474.86	1
c104	c104.a1	pepc104a1a1	AVTCSDSSGFVYDPDGIDVDIIK	209.139	1	7	7 8	3	2625.26	1
c105	c105.a1	pepc105a1a1	MNIYDQIQAVEDRYEEIGEIISDPEVVSDTK	152.118	1	14	14 22	3	3750.83	1
c106	c106.a1	pepc106a1a1	VQTIDPIFVAVADISESVSDINTR	116.042	1	15	15 17	3	2705.38	1

## Sheet: compar_Spectra
Group ID	Sub-group ID	Top PhosphoIsland ID	Top PhosphoIsland protein	Positions	Number of proteins	01_T1_1a_HCDOT	02_T1_1b_HCDOT	03_T1_2a_HCDOT	04_T1_2b_HCDOT	05_T1_3a_HCDOT	06_T1_3b_HCDOT	07_T1_4a_HCDOT	08_T1_4b_HCDOT	09_T1_5a_HCDOT	10_T1_5b_HCDOT	11_T1_6a_HCDOT	12_T1_6b_HCDOT	14_T2_1a_HCDOT	15_T2_1b_HCDOT	16_T2_2a_HCDOT	17_T2_2b_HCDOT	18_T2_3a_HCDOT	19_T2_3b_HCDOT	20_T2_4a_HCDOT	21_T2_4b_HCDOT	22_T2_5a_HCDOT	23_T2_5b_HCDOT	24_T2_6a_HCDOT	25_T2_6b_HCDOT	27_T3_1a_HCDOT	28_T3_1b_HCDOT	29_T3_2a_HCDOT	30_T3_2b_HCDOT	31_T3_3a_HCDOT	32_T3_3b_HCDOT	33_T3_4a_HCDOT	34_T3_4b_HCDOT	35_T3_5a_HCDOT	36_T3_5b_HCDOT	37_T3_6a_HCDOT	38_T3_6b_HCDOT	40_T4_1a_HCDOT	41_T4_1b_HCDOT	42_T4_2a_HCDOT	43_T4_2b_HCDOT	44_T4_3a_HCDOT	45_T4_3b_HCDOT	46_T4_4a_HCDOT	47_T4_4b_HCDOT
a1	a1.a1	a1.a1.a1	gi|116627844|ref|YP_820463.1|STER_1068|Tyrosine-protein kinase (capsular polysaccharide biosynthesis) [Streptococcus thermophilus LMD-9]_hit-name:epsD _hit-score:422_hit-evalue:1e-120_identity-percent:90.2439024390244	211 215 217 218 220 221 223 224 227	1	30	32	6	8	0	0	0	0	0	0	0	0	27	29	2	3	0	0	0	0	0	0	0	0	30	46	2	2	0	0	0	0	0	0	0	0	36	31	4	2	0	0	0	0
a2	a2.a2	a2.a2.a1	gi|116627610|ref|YP_820229.1|STER_0782|Cell division initiation protein [Streptococcus thermophilus LMD-9]_hit-name:divIVA _hit-score:550_hit-evalue:1e-158_identity-percent:98.2817869415807	192 197 201 205	1	5	8	3	3	0	0	0	0	0	0	0	0	6	3	0	0	0	0	0	0	0	0	0	0	6	7	1	1	0	0	0	0	0	0	0	0	3	7	1	1	0	0	0	0
a2	a2.a1	a2.a1.a1	gi|116627610|ref|YP_820229.1|STER_0782|Cell division initiation protein [Streptococcus thermophilus LMD-9]_hit-name:divIVA _hit-score:550_hit-evalue:1e-158_identity-percent:98.2817869415807	282	1	5	6	0	1	0	0	0	1	0	0	0	0	7	7	1	3	0	0	0	0	0	0	0	0	11	10	0	1	1	0	0	0	0	0	0	0	11	10	4	4	1	0	0	0
a3	a3.a5	a3.a5.a1	gi|116627170|ref|YP_819789.1|STER_0283|hypothetical protein STER_0283 [Streptococcus thermophilus LMD-9]_hit-name:pcsB _hit-score:34_hit-evalue:0.006_identity-percent:21.6981132075472	222 224	1	0	0	1	0	0	0	0	0	0	0	0	0	0	0	0	0	0	0	0	0	0	0	0	0	0	0	0	0	0	0	0	0	0	0	0	0	0	0	0	0	0	0	0	0
a3	a3.a3	a3.a3.a1	gi|116627170|ref|YP_819789.1|STER_0283|hypothetical protein STER_0283 [Streptococcus thermophilus LMD-9]_hit-name:pcsB _hit-score:34_hit-evalue:0.006_identity-percent:21.6981132075472	41 43	1	0	0	1	0	0	0	0	0	0	0	0	0	1	0	1	1	0	0	0	0	0	0	0	0	1	1	0	0	0	0	0	0	0	0	0	0	0	0	0	0	0	0	0	0
a3	a3.a1	a3.a1.a1	gi|116627170|ref|YP_819789.1|STER_0283|hypothetical protein STER_0283 [Streptococcus thermophilus LMD-9]_hit-name:pcsB _hit-score:34_hit-evalue:0.006_identity-percent:21.6981132075472	9 10 13	1	6	12	1	0	0	0	0	0	0	0	0	0	7	9	0	0	0	0	0	0	0	0	0	0	7	10	0	0	0	0	0	0	0	0	0	0	8	9	0	0	0	0	0	0
a3	a3.a4	a3.a4.a1	gi|116627170|ref|YP_819789.1|STER_0283|hypothetical protein STER_0283 [Streptococcus thermophilus LMD-9]_hit-name:pcsB _hit-score:34_hit-evalue:0.006_identity-percent:21.6981132075472	90 96 101 102 104 105 106 110 115	1	0	1	0	0	0	0	0	0	0	0	0	0	2	1	0	0	0	0	0	0	0	0	0	0	1	0	0	0	0	0	0	0	0	0	0	0	1	0	0	0	0	0	0	0
a3	a3.a2	a3.a2.a1	gi|116627170|ref|YP_819789.1|STER_0283|hypothetical protein STER_0283 [Streptococcus thermophilus LMD-9]_hit-name:pcsB _hit-score:34_hit-evalue:0.006_identity-percent:21.6981132075472	73 74	1	4	4	3	2	0	0	0	0	0	0	0	0	6	6	1	2	0	0	0	0	0	0	0	0	6	7	0	0	0	0	0	0	0	0	0	0	6	5	1	0	0	0	0	0
a4	a4.b12	a4.b12.a1	gi|116627146|ref|YP_819765.1|STER_0253|groEL|Chaperonin GroEL (HSP60 family) [Streptococcus thermophilus LMD-9]_hit-name:groEL _hit-score:962_hit-evalue:0.0_identity-percent:95.5473098330241	506 509	1	1	0	0	0	0	0	0	0	0	0	0	0	0	0	0	0	0	0	0	0	0	0	0	0	0	0	0	0	0	0	0	0	0	0	0	0	0	0	0	0	0	0	0	0
a4	a4.a3	a4.a3.a1	gi|116627146|ref|YP_819765.1|STER_0253|groEL|Chaperonin GroEL (HSP60 family) [Streptococcus thermophilus LMD-9]_hit-name:groEL _hit-score:962_hit-evalue:0.0_identity-percent:95.5473098330241	241 242	1	1	0	0	0	0	0	0	0	0	0	0	0	1	1	0	0	0	0	0	0	0	0	0	0	1	2	0	0	0	0	0	0	0	0	0	0	2	0	0	0	0	0	0	0
a4	a4.b11	a4.b11.a1	gi|116627146|ref|YP_819765.1|STER_0253|groEL|Chaperonin GroEL (HSP60 family) [Streptococcus thermophilus LMD-9]_hit-name:groEL _hit-score:962_hit-evalue:0.0_identity-percent:95.5473098330241	457 460	1	0	0	0	0	0	0	0	0	0	0	0	0	0	1	0	0	0	0	0	0	0	0	0	0	0	0	0	0	0	0	0	0	0	0	0	0	0	0	0	0	0	0	0	0
a4	a4.a5	a4.a5.a1	gi|116627146|ref|YP_819765.1|STER_0253|groEL|Chaperonin GroEL (HSP60 family) [Streptococcus thermophilus LMD-9]_hit-name:groEL _hit-score:962_hit-evalue:0.0_identity-percent:95.5473098330241	314 319	1	1	1	0	0	0	0	0	0	0	0	0	0	0	0	0	0	0	0	0	0	0	0	0	0	0	0	0	0	0	0	0	0	0	0	0	0	0	0	0	0	0	0	0	0
a4	a4.a7	a4.a7.a1	gi|116627146|ref|YP_819765.1|STER_0253|groEL|Chaperonin GroEL (HSP60 family) [Streptococcus thermophilus LMD-9]_hit-name:groEL _hit-score:962_hit-evalue:0.0_identity-percent:95.5473098330241	371	1	1	0	0	0	0	0	0	0	0	0	0	0	1	0	0	0	0	0	0	0	0	0	0	0	0	0	0	0	0	0	0	0	0	0	0	0	0	0	0	0	0	0	0	0
a4	a4.a2	a4.a2.a1	gi|116627146|ref|YP_819765.1|STER_0253|groEL|Chaperonin GroEL (HSP60 family) [Streptococcus thermophilus LMD-9]_hit-name:groEL _hit-score:962_hit-evalue:0.0_identity-percent:95.5473098330241	349 354 355 356	1	4	3	0	0	0	0	0	0	0	0	0	0	2	0	0	0	0	0	0	0	0	0	0	0	0	0	0	0	0	0	0	0	0	0	0	0	0	0	0	0	0	0	0	0
a4	a4.b10	a4.b10.a1	gi|116627146|ref|YP_819765.1|STER_0253|groEL|Chaperonin GroEL (HSP60 family) [Streptococcus thermophilus LMD-9]_hit-name:groEL _hit-score:962_hit-evalue:0.0_identity-percent:95.5473098330241	322 327	1	0	1	0	0	0	0	0	0	0	0	0	0	0	0	0	0	0	0	0	0	0	0	0	0	0	0	0	0	0	0	0	0	0	0	0	0	0	0	0	0	0	0	0	0
a4	a4.a6	a4.a6.a1	gi|116627146|ref|YP_819765.1|STER_0253|groEL|Chaperonin GroEL (HSP60 family) [Streptococcus thermophilus LMD-9]_hit-name:groEL _hit-score:962_hit-evalue:0.0_identity-percent:95.5473098330241	268	1	1	0	0	0	0	0	0	0	0	0	0	0	1	0	0	0	0	0	0	0	0	0	0	0	0	0	0	0	0	0	0	0	0	0	0	0	0	0	0	0	0	0	0	0
a4	a4.a1	a4.a1.a1	gi|116627146|ref|YP_819765.1|STER_0253|groEL|Chaperonin GroEL (HSP60 family) [Streptococcus thermophilus LMD-9]_hit-name:groEL _hit-score:962_hit-evalue:0.0_identity-percent:95.5473098330241	532 539	1	5	5	8	7	0	0	1	0	0	0	0	0	5	4	2	3	1	1	0	0	0	0	0	0	7	7	4	4	2	2	0	0	0	0	0	0	4	7	1	4	1	1	1	1
a4	a4.a8	a4.a8.a1	gi|116627146|ref|YP_819765.1|STER_0253|groEL|Chaperonin GroEL (HSP60 family) [Streptococcus thermophilus LMD-9]_hit-name:groEL _hit-score:962_hit-evalue:0.0_identity-percent:95.5473098330241	150	1	0	0	0	0	0	0	0	0	0	0	0	0	0	0	0	0	0	0	0	0	0	0	0	0	1	0	0	0	0	0	0	0	0	0	0	0	0	0	0	0	0	0	0	0
a4	a4.a4	a4.a4.a1	gi|116627146|ref|YP_819765.1|STER_0253|groEL|Chaperonin GroEL (HSP60 family) [Streptococcus thermophilus LMD-9]_hit-name:groEL _hit-score:962_hit-evalue:0.0_identity-percent:95.5473098330241	88 89 90	1	1	1	0	0	0	0	0	0	0	0	0	0	0	0	0	0	0	0	0	0	0	0	0	0	1	0	0	0	0	0	0	0	0	0	0	0	0	0	0	0	0	0	0	0
a4	a4.a9	a4.a9.a1	gi|116627146|ref|YP_819765.1|STER_0253|groEL|Chaperonin GroEL (HSP60 family) [Streptococcus thermophilus LMD-9]_hit-name:groEL _hit-score:962_hit-evalue:0.0_identity-percent:95.5473098330241	174 178	1	0	0	0	0	0	0	0	0	0	0	0	0	0	0	0	0	0	0	0	0	0	0	0	0	0	0	0	0	0	0	0	0	0	0	0	0	0	1	0	0	0	0	0	0
a5	a5.a1	a5.a1.a1	gi|116627940|ref|YP_820559.1|STER_1172|Phosphoglycerate mutase 1 [Streptococcus thermophilus LMD-9]_hit-name:gpmA _hit-score:469_hit-evalue:1e-134_identity-percent:100	138 140 144	1	6	5	4	5	0	0	0	0	0	0	0	0	8	6	2	2	0	0	0	0	0	0	0	0	8	6	0	1	0	0	0	0	0	0	0	0	7	7	3	4	0	0	0	0
a5	a5.a2	a5.a2.a1	gi|116627940|ref|YP_820559.1|STER_1172|Phosphoglycerate mutase 1 [Streptococcus thermophilus LMD-9]_hit-name:gpmA _hit-score:469_hit-evalue:1e-134_identity-percent:100	90	1	1	0	0	0	0	0	0	0	0	0	0	0	0	0	0	0	0	0	0	0	0	0	0	0	0	0	0	0	0	0	0	0	0	0	0	0	0	0	0	0	0	0	0	0
a6	a6.a2	a6.a2.a1	gi|116628477|ref|YP_821096.1|STER_1761|Glyceraldehyde-3-phosphate dehydrogenase [Streptococcus thermophilus LMD-9]_hit-name:gapA1 _hit-score:633_hit-evalue:0.0_identity-percent:94.6428571428571	211	1	3	3	0	0	0	0	0	0	0	0	0	0	3	3	0	0	0	0	0	0	0	0	0	0	3	1	0	0	0	0	0	0	0	0	0	0	2	1	0	0	0	0	0	0
a6	a6.a3	a6.a3.a1	gi|116628477|ref|YP_821096.1|STER_1761|Glyceraldehyde-3-phosphate dehydrogenase [Streptococcus thermophilus LMD-9]_hit-name:gapA1 _hit-score:633_hit-evalue:0.0_identity-percent:94.6428571428571	267 270 271 273 280 281 287 288	1	2	1	0	0	0	0	0	0	0	0	0	0	0	3	0	0	0	0	0	0	0	0	0	0	1	1	0	0	0	0	0	0	0	0	0	0	0	1	0	0	0	0	0	0
a6	a6.a1	a6.a1.a1	gi|116628477|ref|YP_821096.1|STER_1761|Glyceraldehyde-3-phosphate dehydrogenase [Streptococcus thermophilus LMD-9]_hit-name:gapA1 _hit-score:633_hit-evalue:0.0_identity-percent:94.6428571428571	143 145 148 151 153 154	1	4	2	1	1	0	0	0	0	0	0	0	0	6	7	1	0	0	0	0	0	0	0	0	0	4	4	0	0	0	0	0	0	0	0	0	0	6	5	1	0	0	0	0	0
a7	a7.a2	a7.a2.a1	gi|116628133|ref|YP_820752.1|STER_1392|serine/threonine protein kinase, fused to several beta-lactam (PASTA) domains [Streptococcus thermophilus LMD-9]_hit-name:pknB _hit-score:1052_hit-evalue:0.0_identity-percent:94.4922547332186	165 167 169 171 175	1	0	0	0	0	1	0	0	0	0	0	0	0	0	0	0	0	0	0	0	0	0	0	0	0	0	0	0	0	0	0	0	0	0	0	0	0	0	0	0	0	0	0	0	0
a7	a7.a1	a7.a1.a1	gi|116628133|ref|YP_820752.1|STER_1392|serine/threonine protein kinase, fused to several beta-lactam (PASTA) domains [Streptococcus thermophilus LMD-9]_hit-name:pknB _hit-score:1052_hit-evalue:0.0_identity-percent:94.4922547332186	289 291 293 301	1	7	7	1	1	0	0	0	0	0	0	0	0	7	5	1	1	0	0	0	0	0	0	0	0	2	2	0	0	0	0	0	0	0	0	0	0	4	3	1	0	0	0	0	0
a8	a8.a1	a8.a1.a1	gi|116627995|ref|YP_820614.1|STER_1230|Phosphomannomutase [Streptococcus thermophilus LMD-9]_hit-name:pgmA _hit-score:49_hit-evalue:2e-07_identity-percent:37.0967741935484	99 101	1	7	5	0	0	0	0	0	0	0	0	0	0	6	7	0	0	0	0	0	0	0	0	0	0	3	3	0	0	0	0	0	0	0	0	0	0	5	7	0	0	0	0	0	0
a9	a9.a1	a9.a1.a1	gi|116628570|ref|YP_821189.1|STER_1876|Fructose/tagatose bisphosphate aldolase [Streptococcus thermophilus LMD-9]_hit-name:tnp1191 _hit-score:_hit-evalue:1.2_identity-percent:29.1666666666667	5 18 25	1	0	0	1	2	0	0	0	0	0	1	0	0	4	2	2	3	0	0	0	0	0	0	0	0	2	1	0	3	0	0	0	0	0	0	0	0	2	1	1	4	0	0	0	0
a9	a9.a3	a9.a3.a1	gi|116628570|ref|YP_821189.1|STER_1876|Fructose/tagatose bisphosphate aldolase [Streptococcus thermophilus LMD-9]_hit-name:tnp1191 _hit-score:_hit-evalue:1.2_identity-percent:29.1666666666667	211	1	0	0	0	0	0	0	0	0	0	0	0	0	1	0	0	0	0	0	0	0	0	0	0	0	1	1	0	0	0	0	0	0	0	0	0	0	0	1	0	0	0	0	0	0
a9	a9.a2	a9.a2.a1	gi|116628570|ref|YP_821189.1|STER_1876|Fructose/tagatose bisphosphate aldolase [Streptococcus thermophilus LMD-9]_hit-name:tnp1191 _hit-score:_hit-evalue:1.2_identity-percent:29.1666666666667	233	1	2	1	0	0	0	0	0	0	0	0	0	0	1	1	0	0	0	0	0	0	0	0	0	0	1	0	0	0	0	0	0	0	0	0	0	0	1	2	0	0	0	0	0	0
b10	b10.a2	b10.a2.a1	gi|116628430|ref|YP_821049.1|STER_1710|sucrose PTS, EIIBCA [Streptococcus thermophilus LMD-9]_hit-name:scrA _hit-score:1031_hit-evalue:0.0_identity-percent:85.4660347551343	351	1	0	0	0	0	0	0	0	0	0	0	0	0	1	0	0	0	0	0	0	0	0	0	0	0	0	0	0	0	0	0	0	0	0	0	0	0	0	0	0	0	0	0	0	0
b10	b10.a1	b10.a1.a1	gi|116628430|ref|YP_821049.1|STER_1710|sucrose PTS, EIIBCA [Streptococcus thermophilus LMD-9]_hit-name:scrA _hit-score:1031_hit-evalue:0.0_identity-percent:85.4660347551343	58 61 67	1	7	2	2	0	0	0	0	0	0	0	0	0	4	6	1	0	0	0	0	0	0	0	0	0	5	5	0	0	0	0	0	0	0	0	0	0	3	3	2	0	0	0	0	0
b11	b11.a1	b11.a1.a1	gi|116627145|ref|YP_819764.1|STER_0252|groES|Co-chaperonin GroES (HSP10) [Streptococcus thermophilus LMD-9]_hit-name:groES _hit-score:181_hit-evalue:2e-48_identity-percent:100	23 31 34 35 37	1	6	5	0	0	0	0	0	0	0	0	0	0	6	4	0	0	0	0	0	0	0	0	0	0	4	2	0	0	0	0	0	0	0	0	0	0	4	3	0	0	0	0	0	0
b11	b11.a2	b11.a2.a1	gi|116627145|ref|YP_819764.1|STER_0252|groES|Co-chaperonin GroES (HSP10) [Streptococcus thermophilus LMD-9]_hit-name:groES _hit-score:181_hit-evalue:2e-48_identity-percent:100	58	1	1	0	0	0	0	0	0	0	0	0	0	0	1	0	0	0	0	0	0	0	0	0	0	0	0	0	0	0	0	0	0	0	0	0	0	0	0	0	0	0	0	0	0	0
b12	b12.a3	b12.a3.a1	gi|116627379|ref|YP_819998.1|STER_0524|GTPase - translation elongation factor [Streptococcus thermophilus LMD-9]_hit-name:tuf _hit-score:726_hit-evalue:0.0_identity-percent:92.713567839196	223 225	1	1	1	0	0	0	0	0	0	0	0	0	0	0	0	0	0	0	0	0	0	0	0	0	0	0	0	0	0	0	0	0	0	0	0	0	0	0	0	0	0	0	0	0	0
b12	b12.a1	b12.a1.a1	gi|116627379|ref|YP_819998.1|STER_0524|GTPase - translation elongation factor [Streptococcus thermophilus LMD-9]_hit-name:tuf _hit-score:726_hit-evalue:0.0_identity-percent:92.713567839196	46 50 52	1	2	0	3	2	0	0	1	0	0	0	0	0	1	1	0	2	0	0	0	0	0	0	0	0	0	0	0	1	0	0	0	0	0	0	0	0	0	1	1	0	0	0	0	0
b12	b12.a4	b12.a4.a1	gi|116627379|ref|YP_819998.1|STER_0524|GTPase - translation elongation factor [Streptococcus thermophilus LMD-9]_hit-name:tuf _hit-score:726_hit-evalue:0.0_identity-percent:92.713567839196	65	1	1	0	0	0	0	0	0	0	0	0	0	0	0	0	0	0	0	0	0	0	0	0	0	0	0	0	0	0	0	0	0	0	0	0	0	0	0	0	0	0	0	0	0	0
b12	b12.a2	b12.a2.a1	gi|116627379|ref|YP_819998.1|STER_0524|GTPase - translation elongation factor [Streptococcus thermophilus LMD-9]_hit-name:tuf _hit-score:726_hit-evalue:0.0_identity-percent:92.713567839196	162 164 177	1	1	2	0	0	0	0	0	0	0	0	0	0	2	1	0	0	0	0	0	0	0	0	0	0	2	3	0	0	0	0	0	0	0	0	0	0	2	1	0	0	0	0	0	0
b12	b12.a5	b12.a5.a1	gi|116627379|ref|YP_819998.1|STER_0524|GTPase - translation elongation factor [Streptococcus thermophilus LMD-9]_hit-name:tuf _hit-score:726_hit-evalue:0.0_identity-percent:92.713567839196	26	1	0	0	0	0	0	0	0	0	0	0	0	0	0	0	0	0	0	0	0	0	0	0	0	0	0	0	0	0	0	0	0	0	0	0	0	0	0	1	0	0	0	0	0	0
b13	b13.a1	b13.a1.a1	gi|116628556|ref|YP_821175.1|STER_1854|Predicted kinase related to dihydroxyacetone kinase [Streptococcus thermophilus LMD-9]_hit-name:rpoC _hit-score:30_hit-evalue:0.10_identity-percent:19.8412698412698	2 5 6 7	1	3	4	0	0	0	0	0	0	0	0	0	0	3	4	0	0	0	0	0	0	0	0	0	0	4	4	0	0	0	0	0	0	0	0	0	0	5	3	0	0	0	0	0	0
b14	b14.a1	b14.a1.a1	gi|116627519|ref|YP_820138.1|STER_0684|eno|Enolase [Streptococcus thermophilus LMD-9]_hit-name:eno _hit-score:853_hit-evalue:0.0_identity-percent:99.5391705069124	370 373 376 379 380	1	0	3	0	0	0	0	0	0	0	0	0	0	0	3	0	0	0	0	0	0	0	0	0	0	3	1	0	0	0	0	0	0	0	0	0	0	4	4	0	0	0	0	0	0
b14	b14.a2	b14.a2.a1	gi|116627519|ref|YP_820138.1|STER_0684|eno|Enolase [Streptococcus thermophilus LMD-9]_hit-name:eno _hit-score:853_hit-evalue:0.0_identity-percent:99.5391705069124	2	1	1	1	1	1	0	0	0	0	0	0	0	0	1	0	0	0	0	0	0	0	0	0	0	0	1	0	0	0	0	0	0	0	0	0	0	0	0	0	0	0	0	0	0	0
b14	b14.a3	b14.a3.a1	gi|116627519|ref|YP_820138.1|STER_0684|eno|Enolase [Streptococcus thermophilus LMD-9]_hit-name:eno _hit-score:853_hit-evalue:0.0_identity-percent:99.5391705069124	39 42 43	1	3	0	0	0	0	0	0	0	0	0	0	0	1	0	0	0	0	0	0	0	0	0	0	0	0	1	0	0	0	0	0	0	0	0	0	0	0	0	0	0	0	0	0	0
b15	b15.a1	b15.a1.a1	gi|116628669|ref|YP_821288.1|STER_1987|Uncharacterized conserved protein containing XRE-family DNA-binding domain [Streptococcus thermophilus LMD-9]_hit-name:purH _hit-score:25_hit-evalue:1.1_identity-percent:38.8888888888889	58 60	1	2	2	2	2	0	0	0	0	0	0	0	0	2	0	2	2	0	0	0	0	0	0	0	0	3	2	1	1	0	0	0	0	0	0	0	0	1	0	0	1	0	0	0	0
b15	b15.a2	b15.a2.a1	gi|116628669|ref|YP_821288.1|STER_1987|Uncharacterized conserved protein containing XRE-family DNA-binding domain [Streptococcus thermophilus LMD-9]_hit-name:purH _hit-score:25_hit-evalue:1.1_identity-percent:38.8888888888889	96	1	1	1	0	0	0	0	0	0	0	0	0	0	1	0	0	0	0	0	0	0	0	0	0	0	0	0	0	0	0	0	0	0	0	0	0	0	0	0	0	0	0	0	0	0
b16	b16.a1	b16.a1.a1	gi|116628624|ref|YP_821243.1|STER_1937|hypothetical protein STER_1937 [Streptococcus thermophilus LMD-9]_hit-name:citB _hit-score:27_hit-evalue:0.044_identity-percent:29.6296296296296	4 7	1	4	3	2	2	0	0	0	0	0	0	0	0	3	2	1	0	0	0	0	0	0	0	0	0	2	1	1	1	0	0	0	0	0	0	0	0	0	1	0	0	0	0	0	0
b17	b17.a1	b17.a1.a1	gi|116628008|ref|YP_820627.1|STER_1243|Phosphotransferase system, HPr-related protein [Streptococcus thermophilus LMD-9]_hit-name:ptsH _hit-score:146_hit-evalue:7e-38_identity-percent:88.5057471264368	12	1	4	3	0	0	0	0	0	0	0	0	0	0	2	3	0	0	0	0	0	0	0	0	0	0	3	3	0	0	0	0	0	0	0	0	0	0	0	1	0	0	0	0	0	0
b17	b17.a2	b17.a2.a1	gi|116628008|ref|YP_820627.1|STER_1243|Phosphotransferase system, HPr-related protein [Streptococcus thermophilus LMD-9]_hit-name:ptsH _hit-score:146_hit-evalue:7e-38_identity-percent:88.5057471264368	46 62 64	1	0	1	0	0	0	0	0	0	0	0	0	0	1	0	0	1	0	0	0	0	0	0	0	0	0	0	0	0	0	0	0	0	0	0	0	0	0	0	0	0	0	0	0	0
b17	b17.a3	b17.a3.a1	gi|116628008|ref|YP_820627.1|STER_1243|Phosphotransferase system, HPr-related protein [Streptococcus thermophilus LMD-9]_hit-name:ptsH _hit-score:146_hit-evalue:7e-38_identity-percent:88.5057471264368	31	1	0	0	0	0	0	0	0	0	0	0	0	0	0	0	0	0	0	0	0	0	0	0	0	0	0	0	0	0	0	0	0	0	0	0	0	0	0	1	0	0	0	0	0	0
b18	b18.a3	b18.a3.a1	gi|116627418|ref|YP_820037.1|STER_0568|rplL|Ribosomal protein L7/L12 [Streptococcus thermophilus LMD-9]_hit-name:rplL _hit-score:125_hit-evalue:2e-31_identity-percent:68.5714285714286	55 61 62	1	2	1	0	0	0	0	0	0	0	0	0	0	1	0	0	0	0	0	0	0	0	0	0	0	0	0	0	0	0	0	0	0	0	0	0	0	0	0	0	0	0	0	0	0
b18	b18.a2	b18.a2.a1	gi|116627418|ref|YP_820037.1|STER_0568|rplL|Ribosomal protein L7/L12 [Streptococcus thermophilus LMD-9]_hit-name:rplL _hit-score:125_hit-evalue:2e-31_identity-percent:68.5714285714286	94 101	1	2	1	0	0	0	0	0	0	0	0	0	0	2	1	0	0	0	0	0	0	0	0	0	0	0	0	0	0	0	0	0	0	0	0	0	0	1	0	0	0	0	0	0	0
b18	b18.a1	b18.a1.a1	gi|116627418|ref|YP_820037.1|STER_0568|rplL|Ribosomal protein L7/L12 [Streptococcus thermophilus LMD-9]_hit-name:rplL _hit-score:125_hit-evalue:2e-31_identity-percent:68.5714285714286	16	1	2	1	0	0	0	0	0	0	0	0	0	0	1	1	0	0	0	0	0	0	0	0	0	0	1	1	0	0	0	0	0	0	0	0	0	0	1	1	0	1	0	0	0	0
b19	b19.a1	b19.a1.a1	gi|116627604|ref|YP_820223.1|STER_0776|Actin-like ATPase involved in cell division [Streptococcus thermophilus LMD-9]_hit-name:ftsA _hit-score:850_hit-evalue:0.0_identity-percent:96.5065502183406	427	1	3	1	0	0	0	0	0	0	0	0	0	0	4	3	0	0	0	0	0	0	0	0	0	0	2	1	0	0	0	0	0	0	0	0	0	0	4	2	0	0	0	0	0	0
b20	b20.a1	b20.a1.a1	gi|116628515|ref|YP_821134.1|STER_1810|UDP-glucose pyrophosphorylase [Streptococcus thermophilus LMD-9]_hit-name:galU _hit-score:595_hit-evalue:1e-172_identity-percent:98.3552631578947	154 157 160 161 168 169	1	1	4	0	0	0	0	0	0	0	0	0	0	1	4	0	0	0	0	0	0	0	0	0	0	2	3	0	0	0	0	0	0	0	0	0	0	3	1	0	0	0	0	0	0
b21	b21.a1	b21.a1.a1	gi|116627943|ref|YP_820562.1|STER_1175|nucleoid DNA-binding protein [Streptococcus thermophilus LMD-9]_hit-name:hstH _hit-score:142_hit-evalue:7e-37_identity-percent:84.6153846153846	71	1	2	2	0	0	0	0	0	0	0	0	0	0	3	2	0	0	0	0	0	0	0	0	0	0	3	2	0	0	0	0	0	0	0	0	0	0	2	1	0	0	0	0	0	0
b22	b22.a1	b22.a1.a1	gi|116627174|ref|YP_819793.1|STER_0288|Predicted periplasmic solute-binding protein [Streptococcus thermophilus LMD-9]_hit-name:pabC _hit-score:1149_hit-evalue:0.0_identity-percent:91.1854103343465	139	1	2	1	0	0	0	0	0	0	0	0	0	0	1	2	0	0	0	0	0	0	0	0	0	0	2	0	0	0	0	0	0	0	0	0	0	0	2	2	0	0	0	0	0	0
b22	b22.a3	b22.a3.a1	gi|116627174|ref|YP_819793.1|STER_0288|Predicted periplasmic solute-binding protein [Streptococcus thermophilus LMD-9]_hit-name:pabC _hit-score:1149_hit-evalue:0.0_identity-percent:91.1854103343465	182	1	0	0	0	0	0	0	0	0	0	0	0	0	1	1	0	0	0	0	0	0	0	0	0	0	0	0	0	0	0	0	0	0	0	0	0	0	0	0	0	0	0	0	0	0
b22	b22.a2	b22.a2.a1	gi|116627174|ref|YP_819793.1|STER_0288|Predicted periplasmic solute-binding protein [Streptococcus thermophilus LMD-9]_hit-name:pabC _hit-score:1149_hit-evalue:0.0_identity-percent:91.1854103343465	15	1	2	0	0	0	0	0	0	0	0	0	0	0	1	0	0	0	0	0	0	0	0	0	0	0	0	0	0	0	0	0	0	0	0	0	0	0	0	0	0	0	0	0	0	0
b23	b23.a1	b23.a1.a1	gi|116627321|ref|YP_819940.1|STER_0461|tRNA nucleotidyltransferase/poly(A) polymerase [Streptococcus thermophilus LMD-9]_hit-name:papL _hit-score:787_hit-evalue:0.0_identity-percent:99.2537313432836	391	1	3	3	0	0	0	0	0	0	0	0	0	0	2	2	0	0	0	0	0	0	0	0	0	0	2	2	0	0	0	0	0	0	0	0	0	0	1	2	0	0	0	0	0	0
b24	b24.a1	b24.a1.a1	gi|116627311|ref|YP_819930.1|STER_0449|hypothetical protein STER_0449 [Streptococcus thermophilus LMD-9]_hit-name:cbpD3 _hit-score:25_hit-evalue:0.60_identity-percent:42.8571428571429	64 65	1	2	2	2	1	0	0	0	0	0	0	0	0	2	1	1	1	0	0	0	0	0	0	0	0	1	2	0	0	0	0	0	0	0	0	0	0	0	0	1	0	0	0	0	0
b25	b25.a3	b25.a3.a1	gi|116627083|ref|YP_819702.1|STER_0163|Molecular chaperone [Streptococcus thermophilus LMD-9]_hit-name:dnaK _hit-score:1061_hit-evalue:0.0_identity-percent:92.5864909390445	473 475	1	0	0	0	0	0	0	0	0	0	0	0	0	1	0	0	0	0	0	0	0	0	0	0	0	0	0	0	0	0	0	0	0	0	0	0	0	0	2	0	0	0	0	0	0
b25	b25.a2	b25.a2.a1	gi|116627083|ref|YP_819702.1|STER_0163|Molecular chaperone [Streptococcus thermophilus LMD-9]_hit-name:dnaK _hit-score:1061_hit-evalue:0.0_identity-percent:92.5864909390445	592 595	1	1	1	0	0	0	0	0	0	0	0	0	0	0	0	0	0	0	0	0	0	0	0	0	0	2	0	0	0	0	0	0	0	0	0	0	0	0	0	0	0	0	0	0	0
b25	b25.a1	b25.a1.a1	gi|116627083|ref|YP_819702.1|STER_0163|Molecular chaperone [Streptococcus thermophilus LMD-9]_hit-name:dnaK _hit-score:1061_hit-evalue:0.0_identity-percent:92.5864909390445	387	1	1	1	0	0	0	0	0	0	0	0	0	0	2	0	0	0	0	0	0	0	0	0	0	0	1	0	0	0	0	0	0	0	0	0	0	0	1	1	0	0	0	0	0	0
b25	b25.a4	b25.a4.a1	gi|116627083|ref|YP_819702.1|STER_0163|Molecular chaperone [Streptococcus thermophilus LMD-9]_hit-name:dnaK _hit-score:1061_hit-evalue:0.0_identity-percent:92.5864909390445	110 115	1	0	0	0	0	0	0	0	0	0	0	0	0	0	1	0	0	0	0	0	0	0	0	0	0	0	0	0	0	0	0	0	0	0	0	0	0	0	0	0	0	0	0	0	0
b25	b25.a5	b25.a5.a1	gi|116627083|ref|YP_819702.1|STER_0163|Molecular chaperone [Streptococcus thermophilus LMD-9]_hit-name:dnaK _hit-score:1061_hit-evalue:0.0_identity-percent:92.5864909390445	295 300 302	1	1	0	0	0	0	0	0	0	0	0	0	0	0	0	0	0	0	0	0	0	0	0	0	0	0	0	0	0	0	0	0	0	0	0	0	0	0	0	0	0	0	0	0	0
b26	b26.a2	b26.a2.a1	gi|116628590|ref|YP_821209.1|STER_1899|Ribosomal protein L29 [Streptococcus thermophilus LMD-9]_hit-name:rpmC _hit-score:98_hit-evalue:2e-23_identity-percent:79.4117647058823	17	1	1	0	0	0	0	0	0	0	0	0	0	0	0	0	0	0	0	0	0	0	0	0	0	0	0	0	0	0	0	0	0	0	0	0	0	0	1	0	0	0	0	0	0	0
b26	b26.a1	b26.a1.a1	gi|116628590|ref|YP_821209.1|STER_1899|Ribosomal protein L29 [Streptococcus thermophilus LMD-9]_hit-name:rpmC _hit-score:98_hit-evalue:2e-23_identity-percent:79.4117647058823	47	1	2	2	0	0	0	0	0	0	0	0	0	0	1	1	0	0	0	0	0	0	0	0	0	0	2	2	0	0	0	0	0	0	0	0	0	0	2	1	0	0	0	0	0	0
b27	b27.a2	b27.a2.a1	gi|116628117|ref|YP_820736.1|STER_1367|Na+/xyloside symporter or related transporter [Streptococcus thermophilus LMD-9]_hit-name:lacS _hit-score:1133_hit-evalue:0.0_identity-percent:91.1671924290221	486 488 489 491 496 497	1	1	2	0	0	0	0	0	0	0	0	0	0	0	2	0	0	0	0	0	0	0	0	0	0	0	0	0	0	0	0	0	0	0	0	0	0	1	0	0	0	0	0	0	0
b27	b27.a3	b27.a3.a1	gi|116628117|ref|YP_820736.1|STER_1367|Na+/xyloside symporter or related transporter [Streptococcus thermophilus LMD-9]_hit-name:lacS _hit-score:1133_hit-evalue:0.0_identity-percent:91.1671924290221	597	1	0	1	0	0	0	0	0	0	0	0	0	0	0	0	0	0	0	0	0	0	0	0	0	0	0	0	0	0	0	0	0	0	0	0	0	0	0	0	0	0	0	0	0	0
b27	b27.a1	b27.a1.a1	gi|116628117|ref|YP_820736.1|STER_1367|Na+/xyloside symporter or related transporter [Streptococcus thermophilus LMD-9]_hit-name:lacS _hit-score:1133_hit-evalue:0.0_identity-percent:91.1671924290221	469 472 473	1	1	2	1	0	0	0	0	0	0	0	0	0	1	2	0	0	0	0	0	0	0	0	0	0	0	0	0	0	0	0	0	0	0	0	0	0	0	1	0	0	0	0	0	0
b28	b28.a1	b28.a1.a1	gi|116628007|ref|YP_820626.1|STER_1242|Phosphoenolpyruvate-protein kinase (PTS system EI component in bacteria) [Streptococcus thermophilus LMD-9]_hit-name:ptsI _hit-score:1082_hit-evalue:0.0_identity-percent:97.5736568457539	51 56	1	4	3	0	0	0	0	0	0	0	0	0	0	1	1	0	0	0	0	0	0	0	0	0	0	0	1	0	0	0	0	0	0	0	0	0	0	1	3	0	0	0	0	0	0
b29	b29.a2	b29.a2.a1	gi|116628019|ref|YP_820638.1|STER_1257|ldh|L-lactate dehydrogenase [Streptococcus thermophilus LMD-9]_hit-name:ldh _hit-score:642_hit-evalue:0.0_identity-percent:100	55	1	1	0	0	0	0	0	0	0	0	0	0	0	0	0	0	0	0	0	0	0	0	0	0	0	0	0	0	0	0	0	0	0	0	0	0	0	0	0	0	0	0	0	0	0
b29	b29.a1	b29.a1.a1	gi|116628019|ref|YP_820638.1|STER_1257|ldh|L-lactate dehydrogenase [Streptococcus thermophilus LMD-9]_hit-name:ldh _hit-score:642_hit-evalue:0.0_identity-percent:100	326	1	0	0	0	0	0	0	0	0	1	0	0	0	3	1	0	0	0	0	0	0	0	0	0	0	3	1	0	0	0	0	0	0	0	0	0	0	1	3	0	0	0	0	0	0
b30	b30.a1	b30.a1.a1	gi|116628434|ref|YP_821053.1|STER_1714|hypothetical protein STER_1714 [Streptococcus thermophilus LMD-9]_hit-name:asp _hit-score:52_hit-evalue:3e-09_identity-percent:28.9719626168224	2 3	1	2	2	0	0	0	0	0	0	0	0	0	0	2	1	0	0	0	0	0	0	0	0	0	0	3	2	0	0	0	0	0	0	0	0	0	0	1	0	0	0	0	0	0	0
b31	b31.a1	b31.a1.a1	gi|116627607|ref|YP_820226.1|STER_0779|Cell division protein [Streptococcus thermophilus LMD-9]_hit-name:int _hit-score:27_hit-evalue:0.22_identity-percent:29.5454545454545	68	1	0	2	0	0	0	0	0	0	0	0	0	0	1	2	0	0	0	0	0	0	0	0	0	0	1	2	0	0	0	0	0	0	0	0	0	0	2	2	0	0	0	0	0	0
b32	b32.a3	b32.a3.a1	gi|116627931|ref|YP_820550.1|STER_1163|Pyruvate kinase [Streptococcus thermophilus LMD-9]_hit-name:pyk _hit-score:909_hit-evalue:0.0_identity-percent:94.2	474	1	0	0	0	0	0	0	0	0	0	0	0	0	0	1	0	0	0	0	0	0	0	0	0	0	1	0	0	0	0	0	0	0	0	0	0	0	0	0	0	0	0	0	0	0
b32	b32.a1	b32.a1.a1	gi|116627931|ref|YP_820550.1|STER_1163|Pyruvate kinase [Streptococcus thermophilus LMD-9]_hit-name:pyk _hit-score:909_hit-evalue:0.0_identity-percent:94.2	77	1	1	1	0	0	0	0	0	0	0	0	0	0	0	1	0	0	0	0	0	0	0	0	0	0	1	0	0	0	0	0	0	0	0	0	0	0	0	2	0	0	0	0	0	0
b32	b32.a2	b32.a2.a1	gi|116627931|ref|YP_820550.1|STER_1163|Pyruvate kinase [Streptococcus thermophilus LMD-9]_hit-name:pyk _hit-score:909_hit-evalue:0.0_identity-percent:94.2	407 409 412	1	0	0	0	0	0	0	0	0	0	0	0	0	1	1	0	0	0	0	0	0	0	0	0	0	1	0	0	0	0	0	0	0	0	0	0	0	1	0	0	0	0	0	0	0
b33	b33.a2	b33.a2.a1	gi|116627605|ref|YP_820224.1|STER_0777|Cell division GTPase [Streptococcus thermophilus LMD-9]_hit-name:ftsZ _hit-score:718_hit-evalue:0.0_identity-percent:87.0454545454545	339 341 342	1	0	0	0	0	0	0	0	0	0	0	0	0	0	0	0	0	0	0	0	0	0	0	0	0	1	1	0	0	0	0	0	0	0	0	0	0	1	0	0	0	0	0	0	0
b33	b33.a1	b33.a1.a1	gi|116627605|ref|YP_820224.1|STER_0777|Cell division GTPase [Streptococcus thermophilus LMD-9]_hit-name:ftsZ _hit-score:718_hit-evalue:0.0_identity-percent:87.0454545454545	2 4 7	1	0	0	0	0	0	0	0	0	0	0	0	0	2	2	0	0	0	0	0	0	0	0	0	0	2	0	0	0	0	0	0	0	0	0	0	0	2	1	0	0	0	0	0	0
b34	b34.a1	b34.a1.a1	gi|116627378|ref|YP_819997.1|STER_0523|cell division membrane protein [Streptococcus thermophilus LMD-9]_hit-name:ftsW _hit-score:744_hit-evalue:0.0_identity-percent:90.3755868544601	407 409	1	0	1	0	0	0	0	0	0	0	0	0	0	2	1	1	0	0	0	0	0	0	0	0	0	2	1	0	0	0	0	0	0	0	0	0	0	2	2	0	0	0	0	0	0
b35	b35.a2	b35.a2.a1	gi|116628425|ref|YP_821044.1|STER_1705|secA|Preprotein translocase subunit SecA (ATPase, RNA helicase) [Streptococcus thermophilus LMD-9]_hit-name:secA _hit-score:1643_hit-evalue:0.0_identity-percent:98.5865724381625	803 804 806	1	1	0	0	0	0	0	0	0	0	0	0	0	1	1	0	0	0	0	0	0	0	0	0	0	0	1	0	0	0	0	0	0	0	0	0	0	0	0	0	0	0	0	0	0
b35	b35.a1	b35.a1.a1	gi|116628425|ref|YP_821044.1|STER_1705|secA|Preprotein translocase subunit SecA (ATPase, RNA helicase) [Streptococcus thermophilus LMD-9]_hit-name:secA _hit-score:1643_hit-evalue:0.0_identity-percent:98.5865724381625	752	1	2	1	0	0	0	0	0	0	0	0	0	0	1	0	0	0	0	0	0	0	0	0	0	0	0	0	0	0	0	0	0	0	0	0	0	0	2	1	0	0	0	0	0	0
b36	b36.a1	b36.a1.a1	gi|116627594|ref|YP_820213.1|STER_0765|hypothetical protein STER_0765 [Streptococcus thermophilus LMD-9]_hit-name:tnpSth1 _hit-score:30_hit-evalue:0.062_identity-percent:20.4081632653061	74 75	1	1	1	0	0	0	0	0	0	0	0	0	0	2	2	0	0	0	0	0	0	0	0	0	0	1	1	0	0	0	0	0	0	0	0	0	0	1	1	0	0	0	0	0	0
b37	b37.a1	b37.a1.a1	gi|116628577|ref|YP_821196.1|STER_1886|Adenylate kinase [Streptococcus thermophilus LMD-9]_hit-name:adk _hit-score:433_hit-evalue:1e-123_identity-percent:99.5412844036697	51	1	2	3	0	0	0	0	0	0	0	0	0	0	2	3	0	0	0	0	0	0	0	0	0	0	0	0	0	0	0	0	0	0	0	0	0	0	0	0	0	0	0	0	0	0
b38	b38.a1	b38.a1.a1	gi|116628478|ref|YP_821097.1|STER_1762|Translation elongation factor (GTPase) [Streptococcus thermophilus LMD-9]_hit-name:fus _hit-score:1366_hit-evalue:0.0_identity-percent:100	43 48	1	1	1	0	0	0	0	0	0	0	0	0	0	1	0	0	0	0	0	0	0	0	0	0	0	3	2	0	0	0	0	0	0	0	0	0	0	1	0	0	0	0	0	0	0
b39	b39.a1	b39.a1.a1	gi|116627434|ref|YP_820053.1|STER_0588|Predicted sulfurtransferase [Streptococcus thermophilus LMD-9]_hit-name:rheB _hit-score:28_hit-evalue:0.27_identity-percent:44.7368421052632	115 116	1	1	1	0	0	0	0	0	0	0	0	0	0	1	1	0	0	0	0	0	0	0	0	0	0	1	2	0	0	0	0	0	0	0	0	0	0	2	0	0	0	0	0	0	0
b40	b40.a1	b40.a1.a1	gi|116628446|ref|YP_821065.1|STER_1728|rpsF|Ribosomal protein S6 [Streptococcus thermophilus LMD-9]_hit-name:rpsF _hit-score:190_hit-evalue:4e-51_identity-percent:98.9583333333333	28	1	1	1	0	0	0	0	0	0	0	0	0	0	0	1	0	0	0	0	0	0	0	0	0	0	2	1	0	0	0	0	0	0	0	0	0	0	1	1	0	0	0	0	0	0
b41	b41.a1	b41.a1.a1	gi|116628505|ref|YP_821124.1|STER_1797|rplA|Ribosomal protein L1 [Streptococcus thermophilus LMD-9]_hit-name:rplA _hit-score:417_hit-evalue:1e-119_identity-percent:94.7598253275109	146	1	3	1	1	1	0	0	0	0	0	0	0	0	0	0	0	0	0	0	0	0	0	0	0	0	0	0	0	0	0	0	0	0	0	0	0	0	0	0	0	0	0	0	0	0
b42	b42.a2	b42.a2.a1	gi|116627614|ref|YP_820233.1|STER_0787|rpmE2|Ribosomal protein L31 [Streptococcus thermophilus LMD-9]_hit-name:rpmE _hit-score:169_hit-evalue:5e-45_identity-percent:100	50	1	1	0	0	0	0	0	0	0	0	0	0	0	1	0	0	0	0	0	0	0	0	0	0	0	0	0	0	0	0	0	0	0	0	0	0	0	0	0	0	0	0	0	0	0
b42	b42.a1	b42.a1.a1	gi|116627614|ref|YP_820233.1|STER_0787|rpmE2|Ribosomal protein L31 [Streptococcus thermophilus LMD-9]_hit-name:rpmE _hit-score:169_hit-evalue:5e-45_identity-percent:100	31 34	1	2	1	0	0	0	0	0	0	0	0	0	0	1	0	0	0	0	0	0	0	0	0	0	0	0	0	0	0	0	0	0	0	0	0	0	0	0	0	0	0	0	0	0	0
b43	b43.a1	b43.a1.a1	gi|116627515|ref|YP_820134.1|STER_0679|catabolite control protein A [Streptococcus thermophilus LMD-9]_hit-name:tnp1191 _hit-score:_hit-evalue:0.042_identity-percent:34.1463414634146	3	1	1	1	0	0	0	0	0	0	0	0	0	0	2	0	0	0	0	0	0	0	0	0	0	0	0	1	0	0	0	0	0	0	0	0	0	0	1	0	0	0	0	0	0	0
b44	b44.a1	b44.a1.a1	gi|116628305|ref|YP_820924.1|STER_1578|ATP-binding subunit of Clp protease and DnaK/DnaJ chaperones [Streptococcus thermophilus LMD-9]_hit-name:clpL _hit-score:1241_hit-evalue:0.0_identity-percent:93.7134502923977	47	1	0	0	0	0	0	0	0	0	0	0	0	0	0	0	0	0	0	0	0	0	0	0	0	0	1	2	0	0	0	0	0	0	0	0	0	0	0	0	0	0	0	0	0	0
b44	b44.a2	b44.a2.a1	gi|116628305|ref|YP_820924.1|STER_1578|ATP-binding subunit of Clp protease and DnaK/DnaJ chaperones [Streptococcus thermophilus LMD-9]_hit-name:clpL _hit-score:1241_hit-evalue:0.0_identity-percent:93.7134502923977	492 493 499 503	1	0	0	0	0	0	0	0	0	0	0	0	0	0	0	0	0	0	0	0	0	0	0	0	0	0	0	0	0	0	0	0	0	0	0	0	0	1	1	0	0	0	0	0	0
b45	b45.a2	b45.a2.a1	gi|116627632|ref|YP_820251.1|STER_0808|Cation transport ATPase [Streptococcus thermophilus LMD-9]_hit-name:pacL1 _hit-score:1602_hit-evalue:0.0_identity-percent:95.6719817767654	730	1	0	1	0	0	0	0	0	0	0	0	0	0	0	0	0	0	0	0	0	0	0	0	0	0	0	0	0	0	0	0	0	0	0	0	0	0	0	0	0	0	0	0	0	0
b45	b45.a1	b45.a1.a1	gi|116627632|ref|YP_820251.1|STER_0808|Cation transport ATPase [Streptococcus thermophilus LMD-9]_hit-name:pacL1 _hit-score:1602_hit-evalue:0.0_identity-percent:95.6719817767654	424 426	1	1	0	0	0	0	0	0	0	0	0	0	0	1	1	0	0	0	0	0	0	0	0	0	0	1	0	0	0	0	0	0	0	0	0	0	0	0	0	0	0	0	0	0	0
b46	b46.a2	b46.a2.a1	gi|116627134|ref|YP_819753.1|STER_0241|p gi|Glucose-6-phosphate isomerase [Streptococcus thermophilus LMD-9]_hit-name:pgi _hit-score:890_hit-evalue:0.0_identity-percent:100	303 304 308 309	1	0	0	0	0	0	0	0	0	0	0	0	0	0	0	0	0	0	0	0	0	0	0	0	0	0	0	0	0	0	0	0	0	0	0	0	0	0	1	0	0	0	0	0	0
b46	b46.a1	b46.a1.a1	gi|116627134|ref|YP_819753.1|STER_0241|p gi|Glucose-6-phosphate isomerase [Streptococcus thermophilus LMD-9]_hit-name:pgi _hit-score:890_hit-evalue:0.0_identity-percent:100	149	1	0	0	0	1	0	0	0	0	0	0	0	0	1	0	0	0	0	0	0	0	0	0	0	0	1	1	0	0	0	0	0	0	0	0	0	0	0	0	0	0	0	0	0	0
b47	b47.a1	b47.a1.a1	gi|116627082|ref|YP_819701.1|STER_0162|Molecular chaperone GrpE (heat shock protein) [Streptococcus thermophilus LMD-9]_hit-name:grpE _hit-score:252_hit-evalue:3e-69_identity-percent:91.4893617021277	44 46 47 54	1	1	0	1	0	0	0	0	0	0	0	0	0	1	0	0	0	0	0	0	0	0	0	0	0	0	0	0	0	0	0	0	0	0	0	0	0	0	0	0	0	0	0	0	0
b47	b47.a2	b47.a2.a1	gi|116627082|ref|YP_819701.1|STER_0162|Molecular chaperone GrpE (heat shock protein) [Streptococcus thermophilus LMD-9]_hit-name:grpE _hit-score:252_hit-evalue:3e-69_identity-percent:91.4893617021277	2	1	0	1	0	0	0	0	0	0	0	0	0	0	0	0	0	0	0	0	0	0	0	0	0	0	0	0	0	0	0	0	0	0	0	0	0	0	0	1	0	0	0	0	0	0
b48	b48.a1	b48.a1.a1	gi|116628116|ref|YP_820735.1|STER_1366|Beta-galactosidase [Streptococcus thermophilus LMD-9]_hit-name:lacZ _hit-score:2081_hit-evalue:0.0_identity-percent:98.5380116959064	38	1	0	1	0	1	0	0	0	0	0	0	0	0	1	1	0	0	0	0	0	0	0	0	0	0	0	1	0	0	0	0	0	0	0	0	0	0	0	0	0	0	0	0	0	0
b49	b49.a1	b49.a1.a1	gi|116627484|ref|YP_820103.1|STER_0644|Peptidoglycan interpeptide bridge formation enzyme [Streptococcus thermophilus LMD-9]_hit-name:murN _hit-score:815_hit-evalue:0.0_identity-percent:99.0267639902676	120 121	1	1	0	0	0	0	0	0	0	0	0	0	0	3	1	0	0	0	0	0	0	0	0	0	0	0	0	0	0	0	0	0	0	0	0	0	0	0	0	0	0	0	0	0	0
b50	b50.a1	b50.a1.a1	gi|116627168|ref|YP_819787.1|STER_0280|Cell division initiation protein [Streptococcus thermophilus LMD-9]_hit-name:divIVA _hit-score:44_hit-evalue:9e-07_identity-percent:40	70 72 74 75 81	1	2	0	0	0	0	0	0	0	0	0	0	0	0	0	0	0	0	0	0	0	0	0	0	0	0	0	0	0	0	0	0	0	0	0	0	0	1	1	0	0	0	0	0	0
b51	b51.a2	b51.a2.a1	gi|116627945|ref|YP_820564.1|STER_1178|hypothetical protein STER_1178 [Streptococcus thermophilus LMD-9]_hit-name:obg _hit-score:27_hit-evalue:0.29_identity-percent:26.4367816091954	13	1	1	0	0	0	0	0	0	0	0	0	0	0	0	0	0	0	0	0	0	0	0	0	0	0	0	0	0	0	0	0	0	0	0	0	0	0	0	0	0	0	0	0	0	0
b51	b51.a1	b51.a1.a1	gi|116627945|ref|YP_820564.1|STER_1178|hypothetical protein STER_1178 [Streptococcus thermophilus LMD-9]_hit-name:obg _hit-score:27_hit-evalue:0.29_identity-percent:26.4367816091954	235 244	1	1	0	0	0	0	0	0	0	0	0	0	0	1	1	0	0	0	0	0	0	0	0	0	0	0	0	0	0	0	0	0	0	0	0	0	0	0	0	0	0	0	0	0	0
b52	b52.a1	b52.a1.a1	gi|116627672|ref|YP_820291.1|STER_0856|Uncharacterized ABC-type transport system, periplasmic component/surface lipoprotein [Streptococcus thermophilus LMD-9]_hit-name:ileS _hit-score:26_hit-evalue:1.1_identity-percent:21.6216216216216	325 326	1	0	0	0	0	0	0	0	0	0	0	0	0	0	1	0	0	0	0	0	0	0	0	0	0	1	1	0	0	0	0	0	0	0	0	0	0	1	0	0	0	0	0	0	0
b53	b53.a1	b53.a1.a1	gi|116628435|ref|YP_821054.1|STER_1715|Translation elongation factor P (EF-P)/translation initiation factor 5A (eIF-5A) [Streptococcus thermophilus LMD-9]_hit-name:efp _hit-score:328_hit-evalue:3e-92_identity-percent:90.8602150537634	145 147 149	1	1	1	0	0	0	0	0	0	0	0	0	0	0	0	0	0	0	0	0	0	0	0	0	0	0	1	0	0	0	0	0	0	0	0	0	0	0	1	0	0	0	0	0	0
b54	b54.a1	b54.a1.a1	gi|116628119|ref|YP_820738.1|STER_1369|UDP-glucose 4-epimerase [Streptococcus thermophilus LMD-9]_hit-name:galE1 _hit-score:674_hit-evalue:0.0_identity-percent:99.3993993993994	152 157 161	1	0	1	0	0	0	0	0	0	0	0	0	0	0	1	0	0	0	0	0	0	0	0	0	0	0	0	0	0	0	0	0	0	0	0	0	0	1	0	0	0	0	0	0	0
b55	b55.a1	b55.a1.a1	gi|116627463|ref|YP_820082.1|STER_0618|Predicted membrane protein, hemolysin III homolog [Streptococcus thermophilus LMD-9]_hit-name:hlyIII _hit-score:428_hit-evalue:1e-122_identity-percent:94.6666666666667	9	1	0	1	0	0	0	0	0	0	0	0	0	0	0	1	0	0	0	0	0	0	0	0	0	0	0	0	0	0	0	0	0	0	0	0	0	0	0	1	0	0	0	0	0	0
b56	b56.a1	b56.a1.a1	gi|116627556|ref|YP_820175.1|STER_0723|hypothetical protein STER_0723 [Streptococcus thermophilus LMD-9]_hit-name:sthII _hit-score:20_hit-evalue:6.6_identity-percent:25.7142857142857	22 23 25	1	0	0	0	0	0	0	0	0	0	0	0	0	2	0	0	0	0	0	0	0	0	0	0	0	0	0	0	0	0	0	0	0	0	0	0	0	1	0	0	0	0	0	0	0
b57	b57.a1	b57.a1.a1	gi|116628347|ref|YP_820966.1|STER_1623|Carbonic anhydrase [Streptococcus thermophilus LMD-9]_hit-name:cah _hit-score:498_hit-evalue:1e-143_identity-percent:93.0769230769231	35 42 55	1	1	2	0	0	0	0	0	0	0	0	0	0	0	0	0	0	0	0	0	0	0	0	0	0	0	0	0	0	0	0	0	0	0	0	0	0	0	0	0	0	0	0	0	0
b58	b58.a1	b58.a1.a1	gi|116627350|ref|YP_819969.1|STER_0492|Parvulin-like peptidyl-prolyl isomerase [Streptococcus thermophilus LMD-9]_hit-name:prtM _hit-score:506_hit-evalue:1e-145_identity-percent:89.0728476821192	10 11 14	1	1	1	0	0	0	0	0	0	0	0	0	0	1	0	0	0	0	0	0	0	0	0	0	0	0	0	0	0	0	0	0	0	0	0	0	0	0	0	0	0	0	0	0	0
b59	b59.a1	b59.a1.a1	gi|116628576|ref|YP_821195.1|STER_1885|infA|Translation initiation factor 1 [Streptococcus thermophilus LMD-9]_hit-name:tnp1239 _hit-score:26_hit-evalue:0.096_identity-percent:35.7142857142857	60	1	0	0	0	1	0	0	0	0	0	0	0	0	0	1	0	0	0	0	0	0	0	0	0	0	0	0	0	0	0	0	0	0	0	0	0	0	0	1	0	0	0	0	0	0
b60	b60.a1	b60.a1.a1	gi|116628639|ref|YP_821258.1|STER_1953|rpmF|Ribosomal protein L32 [Streptococcus thermophilus LMD-9]_hit-name:rpmF _hit-score:123_hit-evalue:6e-31_identity-percent:100	23 26 32 33	1	1	1	0	0	0	0	0	0	0	0	0	0	0	0	0	0	0	0	0	0	0	0	0	0	0	0	0	0	0	0	0	0	0	0	0	0	0	1	0	0	0	0	0	0
b61	b61.a1	b61.a1.a1	gi|116626992|ref|YP_819611.1|STER_0042|Surface antigen [Streptococcus thermophilus LMD-9]_hit-name:pcsB _hit-score:192_hit-evalue:7e-51_identity-percent:80.8695652173913	27 29 34 39 43	1	1	0	1	0	0	0	0	0	0	0	0	0	0	0	0	0	0	0	0	0	0	0	0	0	0	1	0	0	0	0	0	0	0	0	0	0	0	0	0	0	0	0	0	0
b62	b62.a1	b62.a1.a1	gi|116627774|ref|YP_820393.1|STER_0981|pyrE|Orotate phosphoribosyltransferase [Streptococcus thermophilus LMD-9]_hit-name:pyrE _hit-score:408_hit-evalue:1e-116_identity-percent:99.5215311004785	2	1	0	0	0	0	0	0	0	0	0	0	0	0	0	0	0	0	0	0	0	0	0	0	0	0	1	1	0	0	0	0	0	0	0	0	0	0	1	0	0	0	0	0	0	0
b63	b63.a1	b63.a1.a1	gi|116627487|ref|YP_820106.1|STER_0648|ATP-binding subunit of Clp protease and DnaK/DnaJ chaperones [Streptococcus thermophilus LMD-9]_hit-name:clpE _hit-score:1377_hit-evalue:0.0_identity-percent:94.1489361702128	53	1	0	0	0	0	0	0	0	0	0	0	0	0	1	0	0	0	0	0	0	0	0	0	0	0	0	1	0	0	0	0	0	0	0	0	0	0	1	0	0	0	0	0	0	0
b64	b64.a1	b64.a1.a1	gi|116627803|ref|YP_820422.1|STER_1016|Glucan phosphorylase [Streptococcus thermophilus LMD-9]_hit-name:glgP _hit-score:1439_hit-evalue:0.0_identity-percent:95.8885941644562	3	1	0	0	0	0	0	0	0	0	0	0	0	0	1	1	0	0	0	0	0	0	0	0	0	0	1	0	0	0	0	0	0	0	0	0	0	0	0	0	0	0	0	0	0	0
b65	b65.a1	b65.a1.a1	gi|116628176|ref|YP_820795.1|STER_1437|Glycosyltransferase [Streptococcus thermophilus LMD-9]_hit-name:rgpA _hit-score:666_hit-evalue:0.0_identity-percent:81.9371727748691	16	1	1	1	0	0	0	0	0	0	0	0	0	0	0	0	0	0	0	0	0	0	0	0	0	0	1	0	0	0	0	0	0	0	0	0	0	0	0	0	0	0	0	0	0	0
b66	b66.a1	b66.a1.a1	gi|116628243|ref|YP_820862.1|STER_1513|ligA|NAD-dependent DNA ligase [Streptococcus thermophilus LMD-9]_hit-name:ligA _hit-score:1229_hit-evalue:0.0_identity-percent:97.5308641975309	173	1	0	0	0	0	0	0	0	0	0	0	0	0	1	0	0	0	0	0	0	0	0	0	0	0	0	0	0	0	0	0	0	0	0	0	0	0	1	0	0	0	0	0	0	0
b67	b67.a1	b67.a1.a1	gi|116628655|ref|YP_821274.1|STER_1973|rpsD|Ribosomal protein S4 [Streptococcus thermophilus LMD-9]_hit-name:rpsD _hit-score:401_hit-evalue:1e-114_identity-percent:100	31	1	0	1	0	0	0	0	0	0	0	0	0	0	0	0	0	0	0	0	0	0	0	0	0	0	0	0	0	0	0	0	0	0	0	0	0	0	0	1	0	0	0	0	0	0
b68	b68.a1	b68.a1.a1	gi|116627887|ref|YP_820506.1|STER_1117|ABC-type polar amino acid transport system, ATPase component [Streptococcus thermophilus LMD-9]_hit-name:gnlQ _hit-score:266_hit-evalue:2e-73_identity-percent:54.9586776859504	248	1	0	0	0	0	0	0	0	0	0	0	0	0	0	1	0	0	0	0	0	0	0	0	0	0	0	0	0	0	0	0	0	0	0	0	0	0	1	0	0	0	0	0	0	0
b69	b69.a1	b69.a1.a1	gi|116627450|ref|YP_820069.1|STER_0605|hypothetical protein STER_0605 [Streptococcus thermophilus LMD-9]_NOHIT	7	1	0	0	0	0	0	0	0	0	0	0	0	0	1	1	0	0	0	0	0	0	0	0	0	0	0	0	0	0	0	0	0	0	0	0	0	0	0	0	0	0	0	0	0	0
b70	b70.a1	b70.a1.a1	gi|116628232|ref|YP_820851.1|STER_1500|neopullulanase [Streptococcus thermophilus LMD-9]_hit-name:amyL _hit-score:1028_hit-evalue:0.0_identity-percent:100	421	1	0	0	0	0	0	0	0	0	0	0	0	0	0	1	0	0	0	0	0	0	0	0	0	0	1	0	0	0	0	0	0	0	0	0	0	0	0	0	0	0	0	0	0	0
b71	b71.a1	b71.a1.a1	gi|116627533|ref|YP_820152.1|STER_0698|Transcriptional regulator [Streptococcus thermophilus LMD-9]_hit-name:epsA _hit-score:57_hit-evalue:6e-10_identity-percent:27.6018099547511	88	1	0	1	0	0	0	0	0	0	0	0	0	0	0	0	0	0	0	0	0	0	0	0	0	0	0	0	0	0	0	0	0	0	0	0	0	0	0	1	0	0	0	0	0	0
b72	b72.a1	b72.a1.a1	gi|116627477|ref|YP_820096.1|STER_0633|DNA topoisomerase IV subunit B [Streptococcus thermophilus LMD-9]_hit-name:parE _hit-score:1157_hit-evalue:0.0_identity-percent:90.9090909090909	11	1	0	0	0	0	0	0	0	0	0	0	0	0	0	0	1	0	0	0	0	0	0	0	0	0	0	1	0	0	0	0	0	0	0	0	0	0	0	0	0	0	0	0	0	0
b73	b73.a1	b73.a1.a1	gi|116627229|ref|YP_819848.1|STER_0349|Transketolase [Streptococcus thermophilus LMD-9]_hit-name:tkt _hit-score:1313_hit-evalue:0.0_identity-percent:99.6960486322188	36 37	1	0	1	0	0	0	0	0	0	0	0	0	0	0	0	0	0	0	0	0	0	0	0	0	0	1	0	0	0	0	0	0	0	0	0	0	0	0	0	0	0	0	0	0	0
b74	b74.a1	b74.a1.a1	gi|116628346|ref|YP_820965.1|STER_1622|Pyruvate-formate lyase [Streptococcus thermophilus LMD-9]_hit-name:pfl _hit-score:1562_hit-evalue:0.0_identity-percent:100	54	1	0	0	0	0	0	0	0	0	0	0	0	0	0	0	0	0	0	0	0	0	0	0	0	0	1	0	0	0	0	0	0	0	0	0	0	0	0	0	0	0	0	0	0	0
b75	b75.a1	b75.a1.a1	gi|116627675|ref|YP_820294.1|STER_0859|Uncharacterized ABC-type transport system, permease component [Streptococcus thermophilus LMD-9]_hit-name:livH _hit-score:45_hit-evalue:2e-06_identity-percent:26.8181818181818	314	1	1	0	0	0	0	0	0	0	0	0	0	0	0	0	0	0	0	0	0	0	0	0	0	0	0	0	0	0	0	0	0	0	0	0	0	0	0	0	0	0	0	0	0	0
b76	b76.a1	b76.a1.a1	gi|116627136|ref|YP_819755.1|STER_0243|Preprotein translocase subunit YajC [Streptococcus thermophilus LMD-9]_hit-name:yajC _hit-score:185_hit-evalue:2e-49_identity-percent:89.2857142857143	88 89 91	1	0	0	0	0	0	0	0	0	0	0	0	0	1	0	0	0	0	0	0	0	0	0	0	0	0	0	0	0	0	0	0	0	0	0	0	0	0	0	0	0	0	0	0	0
b77	b77.a1	b77.a1.a1	gi|116628571|ref|YP_821190.1|STER_1880|rplQ|Ribosomal protein L17 [Streptococcus thermophilus LMD-9]_hit-name:rplQ _hit-score:246_hit-evalue:7e-68_identity-percent:100	74 75 79 82 83 84 85 86	1	0	0	0	0	0	0	0	0	0	0	0	0	0	0	0	0	0	0	0	0	0	0	0	0	0	0	0	0	0	0	0	0	0	0	0	0	0	1	0	0	0	0	0	0
b78	b78.a1	b78.a1.a1	gi|116627964|ref|YP_820583.1|STER_1197|cell division membrane protein [Streptococcus thermophilus LMD-9]_hit-name:rodA _hit-score:777_hit-evalue:0.0_identity-percent:86.1052631578947	450 452	1	0	0	0	0	0	0	0	0	0	0	0	0	1	0	0	0	0	0	0	0	0	0	0	0	0	0	0	0	0	0	0	0	0	0	0	0	0	0	0	0	0	0	0	0
b79	b79.a1	b79.a1.a1	gi|116627316|ref|YP_819935.1|STER_0455|rplU|Ribosomal protein L21 [Streptococcus thermophilus LMD-9]_hit-name:rplU _hit-score:172_hit-evalue:1e-45_identity-percent:86.5384615384615	2	1	0	1	0	0	0	0	0	0	0	0	0	0	0	0	0	0	0	0	0	0	0	0	0	0	0	0	0	0	0	0	0	0	0	0	0	0	0	0	0	0	0	0	0	0
b80	b80.a1	b80.a1.a1	gi|116628646|ref|YP_821265.1|STER_1962|hypothetical protein STER_1962 [Streptococcus thermophilus LMD-9]_hit-name:grpE _hit-score:24_hit-evalue:1.4_identity-percent:36.3636363636364	59	1	0	1	0	0	0	0	0	0	0	0	0	0	0	0	0	0	0	0	0	0	0	0	0	0	0	0	0	0	0	0	0	0	0	0	0	0	0	0	0	0	0	0	0	0
b81	b81.a1	b81.a1.a1	gi|116627233|ref|YP_819852.1|STER_0353|Predicted metal-binding, possibly nucleic acid-binding protein [Streptococcus thermophilus LMD-9]_hit-name:alaS _hit-score:26_hit-evalue:0.45_identity-percent:38.8888888888889	136	1	0	0	0	0	0	0	0	0	0	0	0	0	1	0	0	0	0	0	0	0	0	0	0	0	0	0	0	0	0	0	0	0	0	0	0	0	0	0	0	0	0	0	0	0
b82	b82.a1	b82.a1.a1	gi|116628281|ref|YP_820900.1|STER_1552|trpD|Anthranilate phosphoribosyltransferase [Streptococcus thermophilus LMD-9]_hit-name:trpD _hit-score:640_hit-evalue:0.0_identity-percent:99.4011976047904	15	1	0	0	0	0	0	0	0	0	0	0	0	0	0	0	0	0	0	0	0	0	0	0	0	0	0	0	0	0	0	0	0	0	0	0	0	0	0	0	0	1	0	0	0	0
b83	b83.a1	b83.a1.a1	gi|116627988|ref|YP_820607.1|STER_1222|dTDP-D-glucose 4,6-dehydratase [Streptococcus thermophilus LMD-9]_hit-name:rmlB _hit-score:720_hit-evalue:0.0_identity-percent:100	178 184	1	0	0	0	0	0	0	0	0	0	0	0	0	0	1	0	0	0	0	0	0	0	0	0	0	0	0	0	0	0	0	0	0	0	0	0	0	0	0	0	0	0	0	0	0
b84	b84.a1	b84.a1.a1	gi|116627334|ref|YP_819953.1|STER_0475|frr|Ribosome recycling factor [Streptococcus thermophilus LMD-9]_hit-name:frr _hit-score:351_hit-evalue:5e-99_identity-percent:99.4594594594595	96	1	0	0	0	0	0	0	0	0	0	0	0	0	0	0	0	0	0	0	0	0	0	0	0	0	1	0	0	0	0	0	0	0	0	0	0	0	0	0	0	0	0	0	0	0
b85	b85.a1	b85.a1.a1	gi|116628595|ref|YP_821214.1|STER_1904|rplB|Ribosomal protein L2 [Streptococcus thermophilus LMD-9]_hit-name:rplB _hit-score:557_hit-evalue:1e-161_identity-percent:100	201	1	0	0	0	0	0	0	0	0	0	0	0	0	0	0	0	0	0	0	0	0	0	0	0	0	0	0	0	0	0	0	0	0	0	0	0	0	1	0	0	0	0	0	0	0
b86	b86.a1	b86.a1.a1	gi|116627090|ref|YP_819709.1|STER_0191|tig|FKBP-type peptidyl-prolyl cis-trans isomerase (trigger factor) [Streptococcus thermophilus LMD-9]_hit-name:tig _hit-score:737_hit-evalue:0.0_identity-percent:90.632318501171	97	1	0	1	0	0	0	0	0	0	0	0	0	0	0	0	0	0	0	0	0	0	0	0	0	0	0	0	0	0	0	0	0	0	0	0	0	0	0	0	0	0	0	0	0	0
b87	b87.a1	b87.a1.a1	gi|116627481|ref|YP_820100.1|STER_0639|rpsA|Ribosomal protein S1 [Streptococcus thermophilus LMD-9]_hit-name:rpsA _hit-score:694_hit-evalue:0.0_identity-percent:92	324	1	0	0	0	0	0	0	0	0	0	0	0	0	0	0	0	0	0	0	0	0	0	0	0	0	0	0	0	0	0	0	0	0	0	0	0	0	0	1	0	0	0	0	0	0
b88	b88.a1	b88.a1.a1	gi|116628423|ref|YP_821042.1|STER_1703|3-deoxy-D-arabino-heptulosonate 7-phosphate (DAHP) synthase [Streptococcus thermophilus LMD-9]_hit-name:aroG1 _hit-score:687_hit-evalue:0.0_identity-percent:99.7084548104956	55 56	1	0	0	0	0	0	0	0	0	0	0	0	0	0	0	0	0	0	0	0	0	0	0	0	0	0	0	0	0	0	0	0	0	0	0	0	0	0	1	0	0	0	0	0	0
b89	b89.a1	b89.a1.a1	gi|116628582|ref|YP_821201.1|STER_1891|rplR|Ribosomal protein L18 [Streptococcus thermophilus LMD-9]_hit-name:rplR _hit-score:227_hit-evalue:4e-62_identity-percent:98.3050847457627	89	1	0	0	0	0	0	0	0	0	0	0	0	0	0	0	0	0	0	0	0	0	0	0	0	0	1	0	0	0	0	0	0	0	0	0	0	0	0	0	0	0	0	0	0	0
b90	b90.a1	b90.a1.a1	gi|116628593|ref|YP_821212.1|STER_1902|rplV|Ribosomal protein L22 [Streptococcus thermophilus LMD-9]_hit-name:rplV _hit-score:218_hit-evalue:3e-59_identity-percent:100	57	1	0	0	0	0	0	0	0	0	0	0	0	0	0	0	0	0	0	0	0	0	0	0	0	0	0	0	0	0	0	0	0	0	0	0	0	0	1	0	0	0	0	0	0	0
b91	b91.a1	b91.a1.a1	gi|116628586|ref|YP_821205.1|STER_1895|rplE|Ribosomal protein L5 [Streptococcus thermophilus LMD-9]_hit-name:rplE _hit-score:320_hit-evalue:9e-90_identity-percent:91.6666666666667	23 24 25	1	0	1	0	0	0	0	0	0	0	0	0	0	0	0	0	0	0	0	0	0	0	0	0	0	0	0	0	0	0	0	0	0	0	0	0	0	0	0	0	0	0	0	0	0
b92	b92.a1	b92.a1.a1	gi|116628674|ref|YP_821293.1|STER_1992|IMP dehydrogenase/GMP reductase [Streptococcus thermophilus LMD-9]_hit-name:guaB _hit-score:923_hit-evalue:0.0_identity-percent:96.551724137931	367 372	1	0	0	0	0	0	0	0	0	0	0	0	0	0	1	0	0	0	0	0	0	0	0	0	0	0	0	0	0	0	0	0	0	0	0	0	0	0	0	0	0	0	0	0	0
b93	b93.a1	b93.a1.a1	gi|116628546|ref|YP_821165.1|STER_1844|DNA-directed RNA polymerase, beta' subunit/160 kD subunit [Streptococcus thermophilus LMD-9]_hit-name:rpoC _hit-score:2248_hit-evalue:0.0_identity-percent:96.1312026913373	1000 1005	1	0	0	0	0	0	0	0	0	1	0	0	0	0	0	0	0	0	0	0	0	0	0	0	0	0	0	0	0	0	0	0	0	0	0	0	0	0	0	0	0	0	0	0	0
b94	b94.a1	b94.a1.a1	gi|116628468|ref|YP_821087.1|STER_1751|Glutamine synthetase [Streptococcus thermophilus LMD-9]_hit-name:tnp1239 _hit-score:_hit-evalue:9.6_identity-percent:35.1351351351351	393	1	0	0	0	0	0	0	0	0	0	0	0	0	0	1	0	0	0	0	0	0	0	0	0	0	0	0	0	0	0	0	0	0	0	0	0	0	0	0	0	0	0	0	0	0
b95	b95.a1	b95.a1.a1	gi|116627599|ref|YP_820218.1|STER_0771|Predicted membrane GTPase involved in stress response [Streptococcus thermophilus LMD-9]_hit-name:typA _hit-score:1145_hit-evalue:0.0_identity-percent:95.7723577235772	425	1	1	0	0	0	0	0	0	0	0	0	0	0	0	0	0	0	0	0	0	0	0	0	0	0	0	0	0	0	0	0	0	0	0	0	0	0	0	0	0	0	0	0	0	0
b96	b96.a1	b96.a1.a1	gi|116628161|ref|YP_820780.1|STER_1422|ppnK|NAD kinase [Streptococcus thermophilus LMD-9]_hit-name:ppnK _hit-score:521_hit-evalue:1e-150_identity-percent:97.7611940298508	51 56 70	1	0	0	0	0	0	0	0	0	0	0	0	0	0	0	1	0	0	0	0	0	0	0	0	0	0	0	0	0	0	0	0	0	0	0	0	0	0	0	0	0	0	0	0	0
b97	b97.a1	b97.a1.a1	gi|116627686|ref|YP_820305.1|STER_0872|Enzyme related to GTP cyclohydrolase I [Streptococcus thermophilus LMD-9]_hit-name:punA _hit-score:24_hit-evalue:1.5_identity-percent:29.7872340425532	11 15 18	1	0	0	0	0	0	0	0	0	0	0	0	0	0	0	0	0	0	0	0	0	0	0	0	0	0	0	0	0	0	0	0	0	0	0	0	0	1	0	0	0	0	0	0	0
b98	b98.a1	b98.a1.a1	gi|116626997|ref|YP_819616.1|STER_0048|Acyl carrier protein [Streptococcus thermophilus LMD-9]_hit-name:acpP1 _hit-score:154_hit-evalue:2e-40_identity-percent:98.7654320987654	26 29	1	0	1	0	0	0	0	0	0	0	0	0	0	0	0	0	0	0	0	0	0	0	0	0	0	0	0	0	0	0	0	0	0	0	0	0	0	0	0	0	0	0	0	0	0
b99	b99.a1	b99.a1.a1	gi|116627300|ref|YP_819919.1|STER_0435|Biotin carboxyl carrier protein [Streptococcus thermophilus LMD-9]_hit-name:accB _hit-score:211_hit-evalue:4e-57_identity-percent:72.8395061728395	48 54 55	1	0	0	0	0	0	0	0	0	0	0	0	0	0	0	0	0	0	0	0	0	0	0	0	0	0	0	0	0	0	0	0	0	0	0	0	0	1	0	0	0	0	0	0	0
c100	c100.a1	c100.a1.a1	gi|116627957|ref|YP_820576.1|STER_1190|Adenine/guanine|Rev|Rev|reversed phosphoribosyltransferase or related PRPP-binding protein [Streptococcus thermophilus LMD-9]_hit-name:apt _hit-score:346_hit-evalue:1e-97_identity-percent:100	128 130 138 139 140	1	0	0	0	0	0	0	0	0	0	0	0	0	1	0	0	0	0	0	0	0	0	0	0	0	0	0	0	0	0	0	0	0	0	0	0	0	0	0	0	0	0	0	0	0
c101	c101.a1	c101.a1.a1	gi|116628583|ref|YP_821202.1|STER_1892|rplF|Ribosomal protein L6P/L9E [Streptococcus thermophilus LMD-9]_hit-name:rplF _hit-score:353_hit-evalue:1e-99_identity-percent:100	127 129	1	0	1	0	0	0	0	0	0	0	0	0	0	0	0	0	0	0	0	0	0	0	0	0	0	0	0	0	0	0	0	0	0	0	0	0	0	0	0	0	0	0	0	0	0
c102	c102.a1	c102.a1.a1	gi|116628118|ref|YP_820737.1|STER_1368|aldose 1-epimerase [Streptococcus thermophilus LMD-9]_hit-name:galM _hit-score:707_hit-evalue:0.0_identity-percent:100	30 31 33 34 37	1	0	0	0	0	0	0	0	0	0	0	0	0	0	0	0	0	0	0	0	0	0	0	0	0	1	0	0	0	0	0	0	0	0	0	0	0	0	0	0	0	0	0	0	0
c103	c103.a1	c103.a1.a1	gi|116627277|ref|YP_819896.1|STER_0401|ABC-type branched-chain amino acid transport system, ATPase component [Streptococcus thermophilus LMD-9]_hit-name:livG _hit-score:488_hit-evalue:1e-140_identity-percent:99.2125984251969	10	1	0	0	0	0	0	0	0	0	0	0	0	0	1	0	0	0	0	0	0	0	0	0	0	0	0	0	0	0	0	0	0	0	0	0	0	0	0	0	0	0	0	0	0	0
c104	c104.a1	c104.a1.a1	gi|116627327|ref|YP_819946.1|STER_0467|Glutamate dehydrogenase/leucine dehydrogenase [Streptococcus thermophilus LMD-9]_hit-name:gdhA _hit-score:893_hit-evalue:0.0_identity-percent:100	265 266	1	1	0	0	0	0	0	0	0	0	0	0	0	0	0	0	0	0	0	0	0	0	0	0	0	0	0	0	0	0	0	0	0	0	0	0	0	0	0	0	0	0	0	0	0
c105	c105.a1	c105.a1.a1	gi|116627620|ref|YP_820239.1|STER_0793|prfA|Protein chain release factor A [Streptococcus thermophilus LMD-9]_hit-name:prfA _hit-score:653_hit-evalue:0.0_identity-percent:94.4289693593315	14 22	1	0	0	0	0	0	0	0	0	0	0	0	0	1	0	0	0	0	0	0	0	0	0	0	0	0	0	0	0	0	0	0	0	0	0	0	0	0	0	0	0	0	0	0	0
c106	c106.a1	c106.a1.a1	gi|116627554|ref|YP_820173.1|STER_0721|Uncharacterized protein containing a divergent version of the methyl-accepting chemotaxis-like domain [Streptococcus thermophilus LMD-9]_hit-name:pepB _hit-score:22_hit-evalue:4.0_identity-percent:28.5714285714286	84 86	1	1	0	0	0	0	0	0	0	0	0	0	0	0	0	0	0	0	0	0	0	0	0	0	0	0	0	0	0	0	0	0	0	0	0	0	0	0	0	0	0	0	0	0	0
[truncated: 4 more columns]

## Sheet: spectra
Group ID	Sub-group ID	Phosphopeptide ID	Sample	Scan	Rt	Sequence (top)	Modifs (top)	Best position in peptide	All observed positions in phosphopeptide	Number of phosphoislands	Phosphoislands Ids	Best e-value	Charge	MH+ Obs	MH+ theo	DeltaMH+	Delta-ppm
a1	a1.a1	pepa1a1b24	02_T1_1b_HCDOT	13524	31.3	YGSYGSYGSYGEYGKK	K15:+28.0313 - K16:+28.0313 - Y1:+28.0313 - Y7:+79.96633	7	7 9 10 13	1	a1.a1.a1	1e-15	3	1929.84	1929.83	0.0057	2.95363
a1	a1.a1	pepa1a1b24	15_T2_1b_HCDOT	12928	31.4	YGSYGSYGSYGEYGKK	K15:+28.0313 - K16:+28.0313 - Y1:+28.0313 - Y13:+79.96633	13	7 9 10 13	1	a1.a1.a1	1e-10	2	1929.83	1929.83	0.0026	1.34727
a1	a1.a1	pepa1a1b24	28_T3_1b_HCDOT	11830	31.91	YGSYGSYGSYGEYGKK	K15:+28.0313 - K16:+28.0313 - Y1:+28.0313 - Y13:+79.96633	13	7 9 10 13	1	a1.a1.a1	5e-11	3	1929.83	1929.83	0.0026	1.34727
a1	a1.a1	pepa1a1b24	15_T2_1b_HCDOT	12496	30.71	YGSYGSYGSYGEYGKK	K15:+28.0313 - K16:+28.0313 - Y1:+28.0313 - S9:+79.96633	9	7 9 10 13	1	a1.a1.a1	5.5e-11	2	1929.83	1929.83	-0.0008	-0.414544
a1	a1.a1	pepa1a1b24	02_T1_1b_HCDOT	13890	31.85	YGSYGSYGSYGEYGKK	K15:+28.0313 - K16:+28.0313 - Y1:+28.0313 - Y13:+79.96633	13	7 9 10 13	1	a1.a1.a1	5.4e-05	2	1929.83	1929.83	0.0039	2.0209
a1	a1.a1	pepa1a1b24	01_T1_1a_HCDOT	12150	31.03	YGSYGSYGSYGEYGKK	K15:+28.0313 - K16:+28.0313 - Y1:+28.0313 - Y7:+79.96633	7	7 9 10 13	1	a1.a1.a1	8.1e-13	3	1929.84	1929.83	0.0048	2.48726
a1	a1.a1	pepa1a1b24	41_T4_1b_HCDOT	11769	31.66	YGSYGSYGSYGEYGKK	K15:+28.0313 - K16:+28.0313 - Y1:+28.0313 - Y13:+79.96633	13	7 9 10 13	1	a1.a1.a1	2.9e-11	2	1929.83	1929.83	0.0037	1.91727
a1	a1.a1	pepa1a1b24	27_T3_1a_HCDOT	11325	31.23	YGSYGSYGSYGEYGKK	K15:+28.0313 - K16:+28.0313 - Y1:+28.0313 - Y13:+79.96633	13	7 9 10 13	1	a1.a1.a1	1e-15	3	1929.83	1929.83	0.0035	1.81363
a1	a1.a1	pepa1a1b24	02_T1_1b_HCDOT	13397	31.1	YGSYGSYGSYGEYGKK	K15:+28.0313 - K16:+28.0313 - Y1:+28.0313 - Y10:+79.96633	10	7 9 10 13	1	a1.a1.a1	2e-08	2	1929.83	1929.83	0.0027	1.39909
a1	a1.a1	pepa1a1b24	28_T3_1b_HCDOT	12037	32.26	YGSYGSYGSYGEYGKK	K15:+28.0313 - K16:+28.0313 - Y1:+28.0313 - Y13:+79.96633	13	7 9 10 13	1	a1.a1.a1	2.9e-05	2	1929.84	1929.83	0.0047	2.43545
a1	a1.a1	pepa1a1b24	40_T4_1a_HCDOT	11363	31.41	YGSYGSYGSYGEYGKK	K15:+28.0313 - K16:+28.0313 - Y1:+28.0313 - Y13:+79.96633	13	7 9 10 13	1	a1.a1.a1	1e-15	2	1929.83	1929.83	0.0037	1.91727
a1	a1.a1	pepa1a1b24	01_T1_1a_HCDOT	12443	31.46	YGSYGSYGSYGEYGKK	K15:+28.0313 - K16:+28.0313 - Y1:+28.0313 - Y13:+79.96633	13	7 9 10 13	1	a1.a1.a1	1e-15	2	1929.83	1929.83	0.0026	1.34727
a1	a1.a1	pepa1a1b24	41_T4_1b_HCDOT	12169	32.35	YGSYGSYGSYGEYGKK	K15:+28.0313 - K16:+28.0313 - Y1:+28.0313 - Y13:+79.96633	13	7 9 10 13	1	a1.a1.a1	3.7e-07	2	1929.84	1929.83	0.0055	2.84999
a1	a1.a1	pepa1a1b24	27_T3_1a_HCDOT	11077	30.85	YGSYGSYGSYGEYGKK	K15:+28.0313 - K16:+28.0313 - Y1:+28.0313 - Y10:+79.96633	10	7 9 10 13	1	a1.a1.a1	1e-15	2	1929.83	1929.83	0.0032	1.65818
a1	a1.a1	pepa1a1b24	42_T4_2a_HCDOT	9333	31.95	YGSYGSYGSYGEYGKK	K15:+28.0313 - K16:+28.0313 - Y1:+28.0313 - Y13:+79.96633	13	7 9 10 13	1	a1.a1.a1	9.2e-07	3	1929.84	1929.83	0.0057	2.95363
a1	a1.a1	pepa1a1b24	28_T3_1b_HCDOT	11403	31.2	YGSYGSYGSYGEYGKK	K15:+28.0313 - K16:+28.0313 - Y1:+28.0313 - Y7:+79.96633	7	7 9 10 13	1	a1.a1.a1	6.4e-08	3	1929.84	1929.83	0.0052	2.69454
a1	a1.a1	pepa1a1b24	40_T4_1a_HCDOT	10930	30.7	YGSYGSYGSYGEYGKK	K15:+28.0313 - K16:+28.0313 - Y1:+28.0313 - Y10:+79.96633	10	7 9 10 13	1	a1.a1.a1	5.9e-08	2	1929.84	1929.83	0.0043	2.22817
a1	a1.a1	pepa1a1b24	40_T4_1a_HCDOT	11157	31.06	YGSYGSYGSYGEYGKK	K15:+28.0313 - K16:+28.0313 - Y1:+28.0313 - Y13:+79.96633	13	7 9 10 13	1	a1.a1.a1	2.2e-09	3	1929.84	1929.83	0.0055	2.84999
a1	a1.a1	pepa1a1b24	14_T2_1a_HCDOT	12188	31.36	YGSYGSYGSYGEYGKK	K15:+28.0313 - K16:+28.0313 - Y1:+28.0313 - Y13:+79.96633	13	7 9 10 13	1	a1.a1.a1	1e-10	2	1929.84	1929.83	0.0075	3.88635
a1	a1.a1	pepa1a1b24	14_T2_1a_HCDOT	11714	30.63	YGSYGSYGSYGEYGKK	K15:+28.0313 - K16:+28.0313 - Y1:+28.0313 - Y10:+79.96633	10	7 9 10 13	1	a1.a1.a1	7.9e-07	2	1929.83	1929.83	0.0013	0.673634
a1	a1.a1	pepa1a1b24	28_T3_1b_HCDOT	11618	31.55	YGSYGSYGSYGEYGKK	K15:+28.0313 - K16:+28.0313 - Y1:+28.0313 - Y13:+79.96633	13	7 9 10 13	1	a1.a1.a1	5.6e-12	2	1929.83	1929.83	0.003	1.55454
a1	a1.a1	pepa1a1b24	28_T3_1b_HCDOT	11189	30.85	YGSYGSYGSYGEYGKK	K15:+28.0313 - K16:+28.0313 - Y1:+28.0313 - S9:+79.96633	9	7 9 10 13	1	a1.a1.a1	6.3e-07	2	1929.84	1929.83	0.011	5.69998
a1	a1.a1	pepa1a1b24	14_T2_1a_HCDOT	11880	30.88	YGSYGSYGSYGEYGKK	K15:+28.0313 - K16:+28.0313 - Y1:+28.0313 - Y7:+79.96633	7	7 9 10 13	1	a1.a1.a1	1e-15	3	1929.83	1929.83	-0.0009	-0.466362
a1	a1.a1	pepa1a1b24	41_T4_1b_HCDOT	12045	32.11	YGSYGSYGSYGEYGKK	K15:+28.0313 - K16:+28.0313 - Y1:+28.0313 - Y13:+79.96633	13	7 9 10 13	1	a1.a1.a1	1e-15	3	1929.84	1929.83	0.0053	2.74635
a1	a1.a1	pepa1a1b24	01_T1_1a_HCDOT	11959	30.75	YGSYGSYGSYGEYGKK	K15:+28.0313 - K16:+28.0313 - Y1:+28.0313 - S9:+79.96633	9	7 9 10 13	1	a1.a1.a1	2.3e-08	2	1929.83	1929.83	0.003	1.55454
a1	a1.a1	pepa1a1b24	27_T3_1a_HCDOT	11511	31.53	YGSYGSYGSYGEYGKK	K15:+28.0313 - K16:+28.0313 - Y1:+28.0313 - Y13:+79.96633	13	7 9 10 13	1	a1.a1.a1	8.7e-13	2	1929.83	1929.83	0.001	0.51818
a1	a1.a1	pepa1a1b24	04_T1_2b_HCDOT	11135	31.7	YGSYGSYGSYGEYGKK	K15:+28.0313 - K16:+28.0313 - Y1:+28.0313 - Y13:+79.96633	13	7 9 10 13	1	a1.a1.a1	1.3e-08	3	1929.83	1929.83	0.0039	2.0209
a1	a1.a1	pepa1a1b24	40_T4_1a_HCDOT	11806	32.13	YGSYGSYGSYGEYGKK	K15:+28.0313 - K16:+28.0313 - Y1:+28.0313 - Y13:+79.96633	13	7 9 10 13	1	a1.a1.a1	8e-05	2	1929.84	1929.83	0.0061	3.1609
a1	a1.a1	pepa1a1b24	41_T4_1b_HCDOT	11630	31.43	YGSYGSYGSYGEYGKK	K15:+28.0313 - K16:+28.0313 - Y1:+28.0313 - Y13:+79.96633	13	7 9 10 13	1	a1.a1.a1	1e-15	3	1929.84	1929.83	0.0055	2.84999
a1	a1.a1	pepa1a1b24	03_T1_2a_HCDOT	11733	31.76	YGSYGSYGSYGEYGKK	K15:+28.0313 - K16:+28.0313 - Y1:+28.0313 - Y13:+79.96633	13	7 9 10 13	1	a1.a1.a1	3.7e-05	3	1929.83	1929.83	0.0017	0.880906
a1	a1.a1	pepa1a1b24	15_T2_1b_HCDOT	12742	31.1	YGSYGSYGSYGEYGKK	K15:+28.0313 - K16:+28.0313 - Y1:+28.0313 - Y13:+79.96633	13	7 9 10 13	1	a1.a1.a1	1.4e-13	3	1929.83	1929.83	0.0031	1.60636
a1	a1.a1	pepa1a1b24	41_T4_1b_HCDOT	11346	30.95	YGSYGSYGSYGEYGKK	K15:+28.0313 - K16:+28.0313 - Y1:+28.0313 - Y10:+79.96633	10	7 9 10 13	1	a1.a1.a1	4.4e-13	2	1929.84	1929.83	0.0057	2.95363
a1	a1.a1	pepa1a1b25	28_T3_1b_HCDOT	11629	31.56	YGSYGSYGSYGEYGKK	K15:+32.0564 - K16:+32.0564 - Y1:+32.0564 - Y13:+79.96633	13	6 7 10 13	1	a1.a1.a1	5.7e-13	3	1941.91	1941.91	0.0027	1.39039
a1	a1.a1	pepa1a1b25	40_T4_1a_HCDOT	10952	30.73	YGSYGSYGSYGEYGKK	K15:+32.0564 - K16:+32.0564 - Y1:+32.0564 - Y10:+79.96633	10	6 7 10 13	1	a1.a1.a1	2.3e-11	3	1941.91	1941.91	0.0035	1.80235
a1	a1.a1	pepa1a1b25	14_T2_1a_HCDOT	11879	30.88	YGSYGSYGSYGEYGKK	K15:+32.0564 - K16:+32.0564 - Y1:+32.0564 - Y7:+79.96633	7	6 7 10 13	1	a1.a1.a1	6.4e-05	3	1941.91	1941.91	0.0027	1.39039
a1	a1.a1	pepa1a1b25	02_T1_1b_HCDOT	13525	31.3	YGSYGSYGSYGEYGKK	K15:+32.0564 - K16:+32.0564 - Y1:+32.0564 - Y7:+79.96633	7	6 7 10 13	1	a1.a1.a1	4e-14	3	1941.91	1941.91	0.0036	1.85385
a1	a1.a1	pepa1a1b25	40_T4_1a_HCDOT	11320	31.35	YGSYGSYGSYGEYGKK	K15:+32.0564 - K16:+32.0564 - Y1:+32.0564 - Y13:+79.96633	13	6 7 10 13	1	a1.a1.a1	3.7e-13	2	1941.91	1941.91	0.0045	2.31731
a1	a1.a1	pepa1a1b25	02_T1_1b_HCDOT	13751	31.65	YGSYGSYGSYGEYGKK	K15:+32.0564 - K16:+32.0564 - Y1:+32.0564 - Y13:+79.96633	13	6 7 10 13	1	a1.a1.a1	5.7e-08	2	1941.91	1941.91	0.0063	3.24423
a1	a1.a1	pepa1a1b25	42_T4_2a_HCDOT	9292	31.85	YGSYGSYGSYGEYGKK	K15:+32.0564 - K16:+32.0564 - Y1:+32.0564 - Y13:+79.96633	13	6 7 10 13	1	a1.a1.a1	7.4e-06	3	1941.91	1941.91	0.0038	1.95684
a1	a1.a1	pepa1a1b25	41_T4_1b_HCDOT	12157	32.31	YGSYGSYGSYGEYGKK	K15:+32.0564 - K16:+32.0564 - Y1:+32.0564 - Y13:+79.96633	13	6 7 10 13	1	a1.a1.a1	2.6e-11	2	1941.91	1941.91	0.0053	2.72928
a1	a1.a1	pepa1a1b25	03_T1_2a_HCDOT	11719	31.73	YGSYGSYGSYGEYGKK	K15:+32.0564 - K16:+32.0564 - Y1:+32.0564 - Y13:+79.96633	13	6 7 10 13	1	a1.a1.a1	2.8e-06	3	1941.91	1941.91	0.0038	1.95684
a1	a1.a1	pepa1a1b25	41_T4_1b_HCDOT	11755	31.63	YGSYGSYGSYGEYGKK	K15:+32.0564 - K16:+32.0564 - Y1:+32.0564 - Y13:+79.96633	13	6 7 10 13	1	a1.a1.a1	5.1e-10	2	1941.91	1941.91	0.0051	2.62629
a1	a1.a1	pepa1a1b25	15_T2_1b_HCDOT	12903	31.36	YGSYGSYGSYGEYGKK	K15:+32.0564 - K16:+32.0564 - Y1:+32.0564 - Y13:+79.96633	13	6 7 10 13	1	a1.a1.a1	2.1e-14	2	1941.91	1941.91	0.0001	0.0514958
a1	a1.a1	pepa1a1b25	14_T2_1a_HCDOT	12076	31.2	YGSYGSYGSYGEYGKK	K15:+32.0564 - K16:+32.0564 - Y1:+32.0564 - Y13:+79.96633	13	6 7 10 13	1	a1.a1.a1	2.5e-12	2	1941.91	1941.91	0.0004	0.205983
a1	a1.a1	pepa1a1b25	01_T1_1a_HCDOT	12149	31.03	YGSYGSYGSYGEYGKK	K15:+32.0564 - K16:+32.0564 - Y1:+32.0564 - S6:+79.96633	6	6 7 10 13	1	a1.a1.a1	4.2e-12	3	1941.91	1941.91	0.0051	2.62629
a1	a1.a1	pepa1a1b25	28_T3_1b_HCDOT	11205	30.88	YGSYGSYGSYGEYGKK	K15:+32.0564 - K16:+32.0564 - Y1:+32.0564 - Y10:+79.96633	10	6 7 10 13	1	a1.a1.a1	2.5e-07	3	1941.91	1941.91	0.0022	1.13291
a1	a1.a1	pepa1a1b25	28_T3_1b_HCDOT	12035	32.25	YGSYGSYGSYGEYGKK	K15:+32.0564 - K16:+32.0564 - Y1:+32.0564 - Y13:+79.96633	13	6 7 10 13	1	a1.a1.a1	4.5e-05	3	1941.91	1941.91	0.0038	1.95684
a1	a1.a1	pepa1a1b25	04_T1_2b_HCDOT	11126	31.68	YGSYGSYGSYGEYGKK	K15:+32.0564 - K16:+32.0564 - Y1:+32.0564 - Y13:+79.96633	13	6 7 10 13	1	a1.a1.a1	4.4e-05	3	1941.91	1941.91	0.0044	2.26581
a1	a1.a1	pepa1a1b25	27_T3_1a_HCDOT	11492	31.51	YGSYGSYGSYGEYGKK	K15:+32.0564 - K16:+32.0564 - Y1:+32.0564 - Y13:+79.96633	13	6 7 10 13	1	a1.a1.a1	1.8e-14	2	1941.91	1941.91	0.0034	1.75086
a1	a1.a1	pepa1a1b25	40_T4_1a_HCDOT	10894	30.65	YGSYGSYGSYGEYGKK	K15:+32.0564 - K16:+32.0564 - Y1:+32.0564 - Y10:+79.96633	10	6 7 10 13	1	a1.a1.a1	1.8e-10	2	1941.91	1941.91	0.0051	2.62629
a1	a1.a1	pepa1a1b25	41_T4_1b_HCDOT	11391	31.03	YGSYGSYGSYGEYGKK	K15:+32.0564 - K16:+32.0564 - Y1:+32.0564 - Y10:+79.96633	10	6 7 10 13	1	a1.a1.a1	2.5e-11	3	1941.91	1941.91	0.0035	1.80235
a1	a1.a1	pepa1a1b25	41_T4_1b_HCDOT	11331	30.93	YGSYGSYGSYGEYGKK	K15:+32.0564 - K16:+32.0564 - Y1:+32.0564 - Y10:+79.96633	10	6 7 10 13	1	a1.a1.a1	7.2e-11	2	1941.91	1941.91	0.0057	2.93526
a1	a1.a1	pepa1a1b25	15_T2_1b_HCDOT	12741	31.1	YGSYGSYGSYGEYGKK	K15:+32.0564 - K16:+32.0564 - Y1:+32.0564 - Y13:+79.96633	13	6 7 10 13	1	a1.a1.a1	1.7e-11	3	1941.91	1941.91	0.0016	0.823933
a1	a1.a1	pepa1a1b25	43_T4_2b_HCDOT	9132	31.83	YGSYGSYGSYGEYGKK	K15:+32.0564 - K16:+32.0564 - Y1:+32.0564 - Y13:+79.96633	13	6 7 10 13	1	a1.a1.a1	1.3e-09	3	1941.91	1941.91	0.0047	2.4203
a1	a1.a1	pepa1a1b25	41_T4_1b_HCDOT	11810	31.73	YGSYGSYGSYGEYGKK	K15:+32.0564 - K16:+32.0564 - Y1:+32.0564 - Y13:+79.96633	13	6 7 10 13	1	a1.a1.a1	1e-15	3	1941.91	1941.91	0.0035	1.80235
a1	a1.a1	pepa1a1b25	27_T3_1a_HCDOT	11773	31.96	YGSYGSYGSYGEYGKK	K15:+32.0564 - K16:+32.0564 - Y1:+32.0564 - Y13:+79.96633	13	6 7 10 13	1	a1.a1.a1	3.3e-09	2	1941.91	1941.91	0.0009	0.463462
a1	a1.a1	pepa1a1b25	28_T3_1b_HCDOT	11178	30.83	YGSYGSYGSYGEYGKK	K15:+32.0564 - K16:+32.0564 - Y1:+32.0564 - Y10:+79.96633	10	6 7 10 13	1	a1.a1.a1	2.7e-10	2	1941.91	1941.91	0.0005	0.257479
a1	a1.a1	pepa1a1b25	28_T3_1b_HCDOT	11602	31.51	YGSYGSYGSYGEYGKK	K15:+32.0564 - K16:+32.0564 - Y1:+32.0564 - Y13:+79.96633	13	6 7 10 13	1	a1.a1.a1	3.9e-12	2	1941.91	1941.91	0.0026	1.33889
a1	a1.a1	pepa1a1b25	01_T1_1a_HCDOT	11989	30.8	YGSYGSYGSYGEYGKK	K15:+32.0564 - K16:+32.0564 - Y1:+32.0564 - Y10:+79.96633	10	6 7 10 13	1	a1.a1.a1	1.2e-08	2	1941.91	1941.91	0.0026	1.33889
a1	a1.a1	pepa1a1b25	14_T2_1a_HCDOT	11613	30.48	YGSYGSYGSYGEYGKK	K15:+32.0564 - K16:+32.0564 - Y1:+32.0564 - Y10:+79.96633	10	6 7 10 13	1	a1.a1.a1	1.1e-07	2	1941.91	1941.91	0.0003	0.154487
a1	a1.a1	pepa1a1b25	28_T3_1b_HCDOT	12023	32.23	YGSYGSYGSYGEYGKK	K15:+32.0564 - K16:+32.0564 - Y1:+32.0564 - Y13:+79.96633	13	6 7 10 13	1	a1.a1.a1	5.6e-08	2	1941.91	1941.91	0.0019	0.97842
a1	a1.a1	pepa1a1b25	27_T3_1a_HCDOT	11525	31.56	YGSYGSYGSYGEYGKK	K15:+32.0564 - K16:+32.0564 - Y1:+32.0564 - Y13:+79.96633	13	6 7 10 13	1	a1.a1.a1	1.9e-11	3	1941.91	1941.91	0.0031	1.59637
a1	a1.a1	pepa1a1b25	40_T4_1a_HCDOT	11376	31.43	YGSYGSYGSYGEYGKK	K15:+32.0564 - K16:+32.0564 - Y1:+32.0564 - Y13:+79.96633	13	6 7 10 13	1	a1.a1.a1	8.2e-15	3	1941.91	1941.91	0.0042	2.16282
a1	a1.a1	pepa1a1b26	41_T4_1b_HCDOT	11770	31.66	YGSYGSYGSYGEYGKK	K15:+36.0756 - K16:+36.0756 - Y1:+36.0756 - Y13:+79.96633	13	7 9 10 13	1	a1.a1.a1	1e-15	3	1953.97	1953.96	0.0063	3.22422
a1	a1.a1	pepa1a1b26	27_T3_1a_HCDOT	11526	31.56	YGSYGSYGSYGEYGKK	K15:+36.0756 - K16:+36.0756 - Y1:+36.0756 - Y13:+79.96633	13	7 9 10 13	1	a1.a1.a1	3.5e-10	3	1953.97	1953.96	0.0032	1.6377
a1	a1.a1	pepa1a1b26	28_T3_1b_HCDOT	11157	30.8	YGSYGSYGSYGEYGKK	K15:+36.0756 - K16:+36.0756 - Y1:+36.0756 - Y10:+79.96633	10	7 9 10 13	1	a1.a1.a1	4.4e-11	2	1953.97	1953.96	0.0057	2.91715
a1	a1.a1	pepa1a1b26	41_T4_1b_HCDOT	11332	30.93	YGSYGSYGSYGEYGKK	K15:+36.0756 - K16:+36.0756 - Y1:+36.0756 - Y10:+79.96633	10	7 9 10 13	1	a1.a1.a1	9.5e-10	2	1953.97	1953.96	0.0056	2.86597
a1	a1.a1	pepa1a1b26	40_T4_1a_HCDOT	11348	31.38	YGSYGSYGSYGEYGKK	K15:+36.0756 - K16:+36.0756 - Y1:+36.0756 - Y13:+79.96633	13	7 9 10 13	1	a1.a1.a1	1.5e-12	3	1953.97	1953.96	0.0083	4.24778
a1	a1.a1	pepa1a1b26	01_T1_1a_HCDOT	11995	30.81	YGSYGSYGSYGEYGKK	K15:+36.0756 - K16:+36.0756 - Y1:+36.0756 - S9:+79.96633	9	7 9 10 13	1	a1.a1.a1	0.00042	2	1953.97	1953.96	0.0041	2.0983
a1	a1.a1	pepa1a1b26	27_T3_1a_HCDOT	11059	30.81	YGSYGSYGSYGEYGKK	K15:+36.0756 - K16:+36.0756 - Y1:+36.0756 - Y10:+79.96633	10	7 9 10 13	1	a1.a1.a1	2e-11	2	1953.96	1953.96	0.0002	0.102356
a1	a1.a1	pepa1a1b26	02_T1_1b_HCDOT	13298	30.96	YGSYGSYGSYGEYGKK	K15:+36.0756 - K16:+36.0756 - Y1:+36.0756 - S9:+79.96633	9	7 9 10 13	1	a1.a1.a1	3.5e-08	2	1953.97	1953.96	0.0059	3.0195
a1	a1.a1	pepa1a1b26	27_T3_1a_HCDOT	11090	30.86	YGSYGSYGSYGEYGKK	K15:+36.0756 - K16:+36.0756 - Y1:+36.0756 - Y10:+79.96633	10	7 9 10 13	1	a1.a1.a1	1e-15	3	1953.97	1953.96	0.0028	1.43298
a1	a1.a1	pepa1a1b26	14_T2_1a_HCDOT	11591	30.45	YGSYGSYGSYGEYGKK	K15:+36.0756 - K16:+36.0756 - Y1:+36.0756 - Y10:+79.96633	10	7 9 10 13	1	a1.a1.a1	1.7e-07	2	1953.96	1953.96	-0.0003	-0.153534
a1	a1.a1	pepa1a1b26	40_T4_1a_HCDOT	10896	30.65	YGSYGSYGSYGEYGKK	K15:+36.0756 - K16:+36.0756 - Y1:+36.0756 - S9:+79.96633	9	7 9 10 13	1	a1.a1.a1	4.6e-07	2	1953.97	1953.96	0.0068	3.48011
a1	a1.a1	pepa1a1b26	28_T3_1b_HCDOT	11593	31.5	YGSYGSYGSYGEYGKK	K15:+36.0756 - K16:+36.0756 - Y1:+36.0756 - Y13:+79.96633	13	7 9 10 13	1	a1.a1.a1	2.8e-09	2	1953.97	1953.96	0.002	1.02356
a1	a1.a1	pepa1a1b26	15_T2_1b_HCDOT	12875	31.31	YGSYGSYGSYGEYGKK	K15:+36.0756 - K16:+36.0756 - Y1:+36.0756 - Y13:+79.96633	13	7 9 10 13	1	a1.a1.a1	4.1e-12	2	1953.97	1953.96	0.0029	1.48416
a1	a1.a1	pepa1a1b26	15_T2_1b_HCDOT	12643	30.95	YGSYGSYGSYGEYGKK	K15:+36.0756 - K16:+36.0756 - Y1:+36.0756 - Y7:+79.96633	7	7 9 10 13	1	a1.a1.a1	2.5e-09	3	1953.96	1953.96	0.0008	0.409424
a1	a1.a1	pepa1a1b26	15_T2_1b_HCDOT	12446	30.63	YGSYGSYGSYGEYGKK	K15:+36.0756 - K16:+36.0756 - Y1:+36.0756 - S9:+79.96633	9	7 9 10 13	1	a1.a1.a1	2.8e-10	2	1953.97	1953.96	0.0023	1.17709
a1	a1.a1	pepa1a1b26	41_T4_1b_HCDOT	11351	30.96	YGSYGSYGSYGEYGKK	K15:+36.0756 - K16:+36.0756 - Y1:+36.0756 - Y10:+79.96633	10	7 9 10 13	1	a1.a1.a1	1e-15	3	1953.97	1953.96	0.0043	2.20065
a1	a1.a1	pepa1a1b26	41_T4_1b_HCDOT	11756	31.63	YGSYGSYGSYGEYGKK	K15:+36.0756 - K16:+36.0756 - Y1:+36.0756 - Y13:+79.96633	13	7 9 10 13	1	a1.a1.a1	1.9e-09	2	1953.97	1953.96	0.0045	2.30301
a1	a1.a1	pepa1a1b26	28_T3_1b_HCDOT	11185	30.85	YGSYGSYGSYGEYGKK	K15:+36.0756 - K16:+36.0756 - Y1:+36.0756 - Y10:+79.96633	10	7 9 10 13	1	a1.a1.a1	1.7e-15	3	1953.97	1953.96	0.0045	2.30301
a1	a1.a1	pepa1a1b26	02_T1_1b_HCDOT	13323	31	YGSYGSYGSYGEYGKK	K15:+36.0756 - K16:+36.0756 - Y1:+36.0756 - Y10:+79.96633	10	7 9 10 13	1	a1.a1.a1	4.8e-07	3	1953.97	1953.96	0.0056	2.86597
a1	a1.a1	pepa1a1b26	02_T1_1b_HCDOT	13803	31.71	YGSYGSYGSYGEYGKK	K15:+36.0756 - K16:+36.0756 - Y1:+36.0756 - Y13:+79.96633	13	7 9 10 13	1	a1.a1.a1	0.00042	3	1953.97	1953.96	0.0043	2.20065
a1	a1.a1	pepa1a1b26	27_T3_1a_HCDOT	11494	31.51	YGSYGSYGSYGEYGKK	K15:+36.0756 - K16:+36.0756 - Y1:+36.0756 - Y13:+79.96633	13	7 9 10 13	1	a1.a1.a1	7.3e-13	2	1953.97	1953.96	0.0045	2.30301
a1	a1.a1	pepa1a1b26	28_T3_1b_HCDOT	11625	31.55	YGSYGSYGSYGEYGKK	K15:+36.0756 - K16:+36.0756 - Y1:+36.0756 - Y13:+79.96633	13	7 9 10 13	1	a1.a1.a1	1e-15	3	1953.97	1953.96	0.0024	1.22827
a1	a1.a1	pepa1a1b26	02_T1_1b_HCDOT	13783	31.68	YGSYGSYGSYGEYGKK	K15:+36.0756 - K16:+36.0756 - Y1:+36.0756 - Y13:+79.96633	13	7 9 10 13	1	a1.a1.a1	3.6e-15	2	1953.97	1953.96	0.0042	2.14948
a1	a1.a1	pepa1a1b26	14_T2_1a_HCDOT	12190	31.36	YGSYGSYGSYGEYGKK	K15:+36.0756 - K16:+36.0756 - Y1:+36.0756 - Y13:+79.96633	13	7 9 10 13	1	a1.a1.a1	2.2e-09	2	1953.97	1953.96	0.0035	1.79123
a1	a1.a1	pepa1a1b26	40_T4_1a_HCDOT	10916	30.68	YGSYGSYGSYGEYGKK	K15:+36.0756 - K16:+36.0756 - Y1:+36.0756 - Y10:+79.96633	10	7 9 10 13	1	a1.a1.a1	1e-15	3	1953.97	1953.96	0.0078	3.99189
a1	a1.a1	pepa1a1b26	40_T4_1a_HCDOT	11340	31.36	YGSYGSYGSYGEYGKK	K15:+36.0756 - K16:+36.0756 - Y1:+36.0756 - Y13:+79.96633	13	7 9 10 13	1	a1.a1.a1	1.1e-13	2	1953.97	1953.96	0.0041	2.0983
a1	a1.a1	pepa1a1b27	40_T4_1a_HCDOT	11295	31.3	YGSYGSYGSYGEYGKK	K15:+28.0313 - K16:+28.0313 - Y1:+28.0313 - Y7:+79.96633 - Y10:+79.96633	7 10	4 6 7 9 10 13	1	a1.a1.a1	8e-08	2	2009.8	2009.8	0.001	0.497563
a1	a1.a1	pepa1a1b27	27_T3_1a_HCDOT	11867	32.11	YGSYGSYGSYGEYGKK	K15:+28.0313 - K16:+28.0313 - Y1:+28.0313 - Y4:+79.96633 - Y13:+79.96633	4 13	4 6 7 9 10 13	1	a1.a1.a1	8.8e-10	2	2009.8	2009.8	0.0031	1.54244
a1	a1.a1	pepa1a1b27	40_T4_1a_HCDOT	11448	31.55	YGSYGSYGSYGEYGKK	K15:+28.0313 - K16:+28.0313 - Y1:+28.0313 - Y7:+79.96633 - Y13:+79.96633	7 13	4 6 7 9 10 13	1	a1.a1.a1	1.8e-09	3	2009.8	2009.8	0.0041	2.04001
a1	a1.a1	pepa1a1b27	14_T2_1a_HCDOT	12252	31.46	YGSYGSYGSYGEYGKK	K15:+28.0313 - K16:+28.0313 - Y1:+28.0313 - Y7:+79.96633 - Y13:+79.96633	7 13	4 6 7 9 10 13	1	a1.a1.a1	5e-05	3	2009.8	2009.8	0.0035	1.74147
a1	a1.a1	pepa1a1b27	02_T1_1b_HCDOT	13781	31.68	YGSYGSYGSYGEYGKK	K15:+28.0313 - K16:+28.0313 - Y1:+28.0313 - Y7:+79.96633 - Y13:+79.96633	7 13	4 6 7 9 10 13	1	a1.a1.a1	4.2e-12	2	2009.8	2009.8	0.0039	1.94049
a1	a1.a1	pepa1a1b27	01_T1_1a_HCDOT	12876	32.11	YGSYGSYGSYGEYGKK	K15:+28.0313 - K16:+28.0313 - Y1:+28.0313 - Y4:+79.96633 - Y13:+79.96633	4 13	4 6 7 9 10 13	1	a1.a1.a1	4.5e-11	2	2009.8	2009.8	0.0037	1.84098
a1	a1.a1	pepa1a1b27	28_T3_1b_HCDOT	11503	31.36	YGSYGSYGSYGEYGKK	K15:+28.0313 - K16:+28.0313 - Y1:+28.0313 - S6:+79.96633 - Y10:+79.96633	6 10	4 6 7 9 10 13	1	a1.a1.a1	1.1e-05	2	2009.8	2009.8	0.0028	1.39318
a1	a1.a1	pepa1a1b27	28_T3_1b_HCDOT	11922	32.06	YGSYGSYGSYGEYGKK	K15:+28.0313 - K16:+28.0313 - Y1:+28.0313 - Y4:+79.96633 - Y13:+79.96633	4 13	4 6 7 9 10 13	1	a1.a1.a1	1.2e-08	2	2009.8	2009.8	0.004	1.99025
a1	a1.a1	pepa1a1b27	02_T1_1b_HCDOT	13797	31.71	YGSYGSYGSYGEYGKK	K15:+28.0313 - K16:+28.0313 - Y1:+28.0313 - Y7:+79.96633 - Y13:+79.96633	7 13	4 6 7 9 10 13	1	a1.a1.a1	9.8e-09	3	2009.8	2009.8	0.0057	2.83611
a1	a1.a1	pepa1a1b27	14_T2_1a_HCDOT	12174	31.35	YGSYGSYGSYGEYGKK	K15:+28.0313 - K16:+28.0313 - Y1:+28.0313 - S6:+79.96633 - Y13:+79.96633	6 13	4 6 7 9 10 13	1	a1.a1.a1	0.0003	2	2009.8	2009.8	-0.0008	-0.39805
a1	a1.a1	pepa1a1b27	01_T1_1a_HCDOT	12542	31.61	YGSYGSYGSYGEYGKK	K15:+28.0313 - K16:+28.0313 - Y1:+28.0313 - Y7:+79.96633 - Y13:+79.96633	7 13	4 6 7 9 10 13	1	a1.a1.a1	6.2e-12	3	2009.8	2009.8	0.0039	1.94049
a1	a1.a1	pepa1a1b27	01_T1_1a_HCDOT	12401	31.41	YGSYGSYGSYGEYGKK	K15:+28.0313 - K16:+28.0313 - Y1:+28.0313 - S6:+79.96633 - Y10:+79.96633	6 10	4 6 7 9 10 13	1	a1.a1.a1	4.6e-06	2	2009.8	2009.8	0.0017	0.845856
a1	a1.a1	pepa1a1b27	41_T4_1b_HCDOT	11645	31.45	YGSYGSYGSYGEYGKK	K15:+28.0313 - K16:+28.0313 - Y1:+28.0313 - S9:+79.96633 - Y7:+79.96633	7 9	4 6 7 9 10 13	1	a1.a1.a1	8.9e-12	2	2009.8	2009.8	0.0028	1.39318
a1	a1.a1	pepa1a1b28	01_T1_1a_HCDOT	12546	31.63	YGSYGSYGSYGEYGKK	K15:+32.0564 - K16:+32.0564 - Y1:+32.0564 - S9:+79.96633 - Y13:+79.96633	9 13	4 7 9 10 13	1	a1.a1.a1	2.5e-10	3	2021.88	2021.87	0.0031	1.53323
a1	a1.a1	pepa1a1b28	28_T3_1b_HCDOT	11882	32	YGSYGSYGSYGEYGKK	K15:+32.0564 - K16:+32.0564 - Y1:+32.0564 - Y4:+79.96633 - Y13:+79.96633	4 13	4 7 9 10 13	1	a1.a1.a1	2e-11	2	2021.88	2021.87	0.0044	2.1762
a1	a1.a1	pepa1a1b28	14_T2_1a_HCDOT	12146	31.3	YGSYGSYGSYGEYGKK	K15:+32.0564 - K16:+32.0564 - Y1:+32.0564 - Y4:+79.96633 - Y10:+79.96633	4 10	4 7 9 10 13	1	a1.a1.a1	0.00017	2	2021.88	2021.87	0.0027	1.3354
a1	a1.a1	pepa1a1b28	28_T3_1b_HCDOT	11675	31.65	YGSYGSYGSYGEYGKK	K15:+32.0564 - K16:+32.0564 - Y1:+32.0564 - Y7:+79.96633 - Y13:+79.96633	7 13	4 7 9 10 13	1	a1.a1.a1	2.5e-06	3	2021.88	2021.87	0.0061	3.017
a1	a1.a1	pepa1a1b28	02_T1_1b_HCDOT	13796	31.71	YGSYGSYGSYGEYGKK	K15:+32.0564 - K16:+32.0564 - Y1:+32.0564 - Y7:+79.96633 - Y13:+79.96633	7 13	4 7 9 10 13	1	a1.a1.a1	2.3e-11	3	2021.88	2021.87	0.0041	2.02782
a1	a1.a1	pepa1a1b28	27_T3_1a_HCDOT	11540	31.58	YGSYGSYGSYGEYGKK	K15:+32.0564 - K16:+32.0564 - Y1:+32.0564 - Y7:+79.96633 - Y13:+79.96633	7 13	4 7 9 10 13	1	a1.a1.a1	2.1e-15	3	2021.88	2021.87	0.0048	2.37404
a1	a1.a1	pepa1a1b28	14_T2_1a_HCDOT	12229	31.43	YGSYGSYGSYGEYGKK	K15:+32.0564 - K16:+32.0564 - Y1:+32.0564 - Y7:+79.96633 - Y13:+79.96633	7 13	4 7 9 10 13	1	a1.a1.a1	5.7e-05	3	2021.88	2021.87	0.0046	2.27512
a1	a1.a1	pepa1a1b28	40_T4_1a_HCDOT	11430	31.51	YGSYGSYGSYGEYGKK	K15:+32.0564 - K16:+32.0564 - Y1:+32.0564 - Y7:+79.96633 - Y13:+79.96633	7 13	4 7 9 10 13	1	a1.a1.a1	3.7e-15	3	2021.88	2021.87	0.0044	2.1762
a1	a1.a1	pepa1a1b28	15_T2_1b_HCDOT	12987	31.5	YGSYGSYGSYGEYGKK	K15:+32.0564 - K16:+32.0564 - Y1:+32.0564 - Y7:+79.96633 - Y13:+79.96633	7 13	4 7 9 10 13	1	a1.a1.a1	0.00032	3	2021.88	2021.87	0.0037	1.82999
a1	a1.a1	pepa1a1b28	14_T2_1a_HCDOT	12192	31.36	YGSYGSYGSYGEYGKK	K15:+32.0564 - K16:+32.0564 - Y1:+32.0564 - Y7:+79.96633 - Y13:+79.96633	7 13	4 7 9 10 13	1	a1.a1.a1	1.4e-07	2	2021.88	2021.87	0.0026	1.28594
a1	a1.a1	pepa1a1b29	28_T3_1b_HCDOT	11460	31.28	YGSYGSYGSYGEYGKK	K15:+36.0756 - K16:+36.0756 - Y1:+36.0756 - S9:+79.96633 - Y7:+79.96633	7 9	4 6 7 9 10 13	1	a1.a1.a1	9e-07	2	2033.93	2033.93	-0.0003	-0.147498
a1	a1.a1	pepa1a1b29	27_T3_1a_HCDOT	11454	31.45	YGSYGSYGSYGEYGKK	K15:+36.0756 - K16:+36.0756 - Y1:+36.0756 - S9:+79.96633 - Y7:+79.96633	7 9	4 6 7 9 10 13	1	a1.a1.a1	3.1e-06	2	2033.93	2033.93	-0.001	-0.491659
a1	a1.a1	pepa1a1b29	01_T1_1a_HCDOT	12591	31.68	YGSYGSYGSYGEYGKK	K15:+36.0756 - K16:+36.0756 - Y1:+36.0756 - Y10:+79.96633 - Y13:+79.96633	10 13	4 6 7 9 10 13	1	a1.a1.a1	1.7e-08	3	2033.93	2033.93	0.0018	0.884986
a1	a1.a1	pepa1a1b29	28_T3_1b_HCDOT	11877	31.98	YGSYGSYGSYGEYGKK	K15:+36.0756 - K16:+36.0756 - Y1:+36.0756 - Y4:+79.96633 - Y13:+79.96633	4 13	4 6 7 9 10 13	1	a1.a1.a1	8.2e-15	2	2033.93	2033.93	-0.0019	-0.934152
a1	a1.a1	pepa1a1b29	14_T2_1a_HCDOT	12206	31.4	YGSYGSYGSYGEYGKK	K15:+36.0756 - K16:+36.0756 - Y1:+36.0756 - Y7:+79.96633 - Y13:+79.96633	7 13	4 6 7 9 10 13	1	a1.a1.a1	3.1e-12	2	2033.93	2033.93	0.0024	1.17998
a1	a1.a1	pepa1a1b29	01_T1_1a_HCDOT	12626	31.75	YGSYGSYGSYGEYGKK	K15:+36.0756 - K16:+36.0756 - Y1:+36.0756 - S9:+79.96633 - Y13:+79.96633	9 13	4 6 7 9 10 13	1	a1.a1.a1	8.2e-05	2	2033.94	2033.93	0.007	3.44161
a1	a1.a1	pepa1a1b29	15_T2_1b_HCDOT	12950	31.45	YGSYGSYGSYGEYGKK	K15:+36.0756 - K16:+36.0756 - Y1:+36.0756 - Y7:+79.96633 - Y13:+79.96633	7 13	4 6 7 9 10 13	1	a1.a1.a1	1.7e-12	2	2033.93	2033.93	0.004	1.96664
a1	a1.a1	pepa1a1b20	02_T1_1b_HCDOT	17007	36.5	YGSYGSYGSYGEYGK	K15:+36.0756 - Y1:+36.0756 - Y13:+79.96633	13	1 6 7 9 10 13	1	a1.a1.a1	1.1e-10	2	1789.8	1789.79	0.0038	2.12315
a1	a1.a1	pepa1a1b20	17_T2_2b_HCDOT	13219	36.38	YGSYGSYGSYGEYGK	K15:+36.0756 - Y1:+36.0756 - Y13:+79.96633	13	1 6 7 9 10 13	1	a1.a1.a1	2.1e-07	2	1789.8	1789.79	0.0032	1.78792
a1	a1.a1	pepa1a1b20	30_T3_2b_HCDOT	11252	35.91	YGSYGSYGSYGEYGK	K15:+36.0756 - Y1:+36.0756 - Y10:+79.96633	10	1 6 7 9 10 13	1	a1.a1.a1	1.3e-05	2	1789.79	1789.79	0.0013	0.726341
a1	a1.a1	pepa1a1b20	30_T3_2b_HCDOT	11627	36.6	YGSYGSYGSYGEYGK	K15:+36.0756 - Y1:+36.0756 - Y13:+79.96633	13	1 6 7 9 10 13	1	a1.a1.a1	8.1e-05	2	1789.8	1789.79	0.0032	1.78792
a1	a1.a1	pepa1a1b20	04_T1_2b_HCDOT	13852	36.58	YGSYGSYGSYGEYGK	K15:+36.0756 - Y1:+36.0756 - Y13:+79.96633	13	1 6 7 9 10 13	1	a1.a1.a1	1.3e-08	2	1789.8	1789.79	0.0052	2.90536
a1	a1.a1	pepa1a1b20	40_T4_1a_HCDOT	13934	35.5	YGSYGSYGSYGEYGK	K15:+36.0756 - Y1:+36.0756 - S9:+79.96633	9	1 6 7 9 10 13	1	a1.a1.a1	6.1e-06	2	1789.8	1789.79	0.0047	2.626
a1	a1.a1	pepa1a1b20	02_T1_1b_HCDOT	17609	37.4	YGSYGSYGSYGEYGK	K15:+36.0756 - Y1:+36.0756 - Y1:+79.96633	1	1 6 7 9 10 13	1	a1.a1.a1	4.5e-15	2	1789.79	1789.79	0.0016	0.893958
a1	a1.a1	pepa1a1b20	01_T1_1a_HCDOT	15762	36.36	YGSYGSYGSYGEYGK	K15:+36.0756 - Y1:+36.0756 - Y13:+79.96633	13	1 6 7 9 10 13	1	a1.a1.a1	6.6e-10	2	1789.8	1789.79	0.0045	2.51426
a1	a1.a1	pepa1a1b20	14_T2_1a_HCDOT	14873	35.4	YGSYGSYGSYGEYGK	K15:+36.0756 - Y1:+36.0756 - Y10:+79.96633	10	1 6 7 9 10 13	1	a1.a1.a1	1.6e-10	2	1789.79	1789.79	0.0004	0.223489
a1	a1.a1	pepa1a1b20	01_T1_1a_HCDOT	15270	35.65	YGSYGSYGSYGEYGK	K15:+36.0756 - Y1:+36.0756 - Y10:+79.96633	10	1 6 7 9 10 13	1	a1.a1.a1	1.6e-09	2	1789.8	1789.79	0.0038	2.12315
a1	a1.a1	pepa1a1b20	15_T2_1b_HCDOT	16381	36.83	YGSYGSYGSYGEYGK	K15:+36.0756 - Y1:+36.0756 - Y7:+79.96633	7	1 6 7 9 10 13	1	a1.a1.a1	8.1e-06	2	1789.8	1789.79	0.0019	1.06158
a1	a1.a1	pepa1a1b20	40_T4_1a_HCDOT	14377	36.21	YGSYGSYGSYGEYGK	K15:+36.0756 - Y1:+36.0756 - Y13:+79.96633	13	1 6 7 9 10 13	1	a1.a1.a1	2.9e-10	2	1789.8	1789.79	0.0032	1.78792
a1	a1.a1	pepa1a1b20	28_T3_1b_HCDOT	15010	37.08	YGSYGSYGSYGEYGK	K15:+36.0756 - Y1:+36.0756 - Y1:+79.96633	1	1 6 7 9 10 13	1	a1.a1.a1	8.7e-12	2	1789.8	1789.79	0.0024	1.34094
a1	a1.a1	pepa1a1b20	28_T3_1b_HCDOT	14084	35.58	YGSYGSYGSYGEYGK	K15:+36.0756 - Y1:+36.0756 - Y10:+79.96633	10	1 6 7 9 10 13	1	a1.a1.a1	1.2e-12	2	1789.8	1789.79	0.0017	0.94983
a1	a1.a1	pepa1a1b20	02_T1_1b_HCDOT	16519	35.75	YGSYGSYGSYGEYGK	K15:+36.0756 - Y1:+36.0756 - Y10:+79.96633	10	1 6 7 9 10 13	1	a1.a1.a1	7.5e-12	2	1789.8	1789.79	0.0043	2.40251
a1	a1.a1	pepa1a1b20	14_T2_1a_HCDOT	15342	36.11	YGSYGSYGSYGEYGK	K15:+36.0756 - Y1:+36.0756 - Y13:+79.96633	13	1 6 7 9 10 13	1	a1.a1.a1	8.5e-13	2	1789.79	1789.79	0.0005	0.279362
a1	a1.a1	pepa1a1b20	28_T3_1b_HCDOT	14526	36.3	YGSYGSYGSYGEYGK	K15:+36.0756 - Y1:+36.0756 - Y13:+79.96633	13	1 6 7 9 10 13	1	a1.a1.a1	1.9e-08	2	1789.8	1789.79	0.0025	1.39681
a1	a1.a1	pepa1a1b20	15_T2_1b_HCDOT	15922	36.11	YGSYGSYGSYGEYGK	K15:+36.0756 - Y1:+36.0756 - Y13:+79.96633	13	1 6 7 9 10 13	1	a1.a1.a1	1.3e-11	2	1789.79	1789.79	0.0007	0.391107
a1	a1.a1	pepa1a1b20	14_T2_1a_HCDOT	15938	37.01	YGSYGSYGSYGEYGK	K15:+36.0756 - Y1:+36.0756 - Y1:+79.96633	1	1 6 7 9 10 13	1	a1.a1.a1	1e-15	2	1789.79	1789.79	0	0
a1	a1.a1	pepa1a1b20	41_T4_1b_HCDOT	14290	35.78	YGSYGSYGSYGEYGK	K15:+36.0756 - Y1:+36.0756 - Y10:+79.96633	10	1 6 7 9 10 13	1	a1.a1.a1	2.7e-14	2	1789.79	1789.79	0.0007	0.391107
a1	a1.a1	pepa1a1b20	04_T1_2b_HCDOT	13471	35.9	YGSYGSYGSYGEYGK	K15:+36.0756 - Y1:+36.0756 - Y10:+79.96633	10	1 6 7 9 10 13	1	a1.a1.a1	2.2e-05	2	1789.8	1789.79	0.0052	2.90536
a1	a1.a1	pepa1a1b20	17_T2_2b_HCDOT	12832	35.68	YGSYGSYGSYGEYGK	K15:+36.0756 - Y1:+36.0756 - Y10:+79.96633	10	1 6 7 9 10 13	1	a1.a1.a1	8e-05	2	1789.8	1789.79	0.0029	1.6203
a1	a1.a1	pepa1a1b19	02_T1_1b_HCDOT	16506	35.73	YGSYGSYGSYGEYGK	K15:+32.0564 - Y1:+32.0564 - Y10:+79.96633	10	4 6 9 10 13	1	a1.a1.a1	4.9e-12	2	1781.76	1781.76	0.0019	1.06636
a1	a1.a1	pepa1a1b19	42_T4_2a_HCDOT	11379	35.91	YGSYGSYGSYGEYGK	K15:+32.0564 - Y1:+32.0564 - Y10:+79.96633	10	4 6 9 10 13	1	a1.a1.a1	3.5e-05	2	1781.76	1781.76	0.0046	2.58172
a1	a1.a1	pepa1a1b19	28_T3_1b_HCDOT	14098	35.6	YGSYGSYGSYGEYGK	K15:+32.0564 - Y1:+32.0564 - Y10:+79.96633	10	4 6 9 10 13	1	a1.a1.a1	1.2e-11	2	1781.75	1781.76	-0.0015	-0.841867
a1	a1.a1	pepa1a1b19	04_T1_2b_HCDOT	13967	36.78	YGSYGSYGSYGEYGK	K15:+32.0564 - Y1:+32.0564 - S6:+79.96633	6	4 6 9 10 13	1	a1.a1.a1	0.00029	2	1781.76	1781.76	0.0053	2.9746
a1	a1.a1	pepa1a1b19	01_T1_1a_HCDOT	15271	35.65	YGSYGSYGSYGEYGK	K15:+32.0564 - Y1:+32.0564 - Y10:+79.96633	10	4 6 9 10 13	1	a1.a1.a1	1.6e-11	2	1781.76	1781.76	0.0018	1.01024
a1	a1.a1	pepa1a1b19	28_T3_1b_HCDOT	14536	36.31	YGSYGSYGSYGEYGK	K15:+32.0564 - Y1:+32.0564 - Y13:+79.96633	13	4 6 9 10 13	1	a1.a1.a1	1.5e-14	2	1781.76	1781.76	0.0027	1.51536
a1	a1.a1	pepa1a1b19	16_T2_2a_HCDOT	13578	36.53	YGSYGSYGSYGEYGK	K15:+32.0564 - Y1:+32.0564 - Y4:+79.96633	4	4 6 9 10 13	1	a1.a1.a1	1.4e-05	2	1781.76	1781.76	0.002	1.12249
a1	a1.a1	pepa1a1b19	04_T1_2b_HCDOT	13480	35.91	YGSYGSYGSYGEYGK	K15:+32.0564 - Y1:+32.0564 - Y10:+79.96633	10	4 6 9 10 13	1	a1.a1.a1	4.3e-07	2	1781.76	1781.76	0.0053	2.9746
a1	a1.a1	pepa1a1b19	14_T2_1a_HCDOT	15224	35.93	YGSYGSYGSYGEYGK	K15:+32.0564 - Y1:+32.0564 - Y13:+79.96633	13	4 6 9 10 13	1	a1.a1.a1	1.5e-12	2	1781.76	1781.76	0.0013	0.729618
a1	a1.a1	pepa1a1b19	02_T1_1b_HCDOT	17006	36.5	YGSYGSYGSYGEYGK	K15:+32.0564 - Y1:+32.0564 - Y13:+79.96633	13	4 6 9 10 13	1	a1.a1.a1	1.1e-10	2	1781.76	1781.76	0.004	2.24498
a1	a1.a1	pepa1a1b19	43_T4_2b_HCDOT	11235	35.88	YGSYGSYGSYGEYGK	K15:+32.0564 - Y1:+32.0564 - Y10:+79.96633	10	4 6 9 10 13	1	a1.a1.a1	1.1e-08	2	1781.75	1781.76	-0.0003	-0.168373
a1	a1.a1	pepa1a1b19	41_T4_1b_HCDOT	14307	35.8	YGSYGSYGSYGEYGK	K15:+32.0564 - Y1:+32.0564 - Y10:+79.96633	10	4 6 9 10 13	1	a1.a1.a1	1.2e-12	2	1781.76	1781.76	0.0047	2.63785
a1	a1.a1	pepa1a1b19	29_T3_2a_HCDOT	11773	36.51	YGSYGSYGSYGEYGK	K15:+32.0564 - Y1:+32.0564 - Y13:+79.96633	13	4 6 9 10 13	1	a1.a1.a1	3.5e-10	2	1781.76	1781.76	0.0021	1.17861
a1	a1.a1	pepa1a1b19	27_T3_1a_HCDOT	14477	36.18	YGSYGSYGSYGEYGK	K15:+32.0564 - Y1:+32.0564 - Y13:+79.96633	13	4 6 9 10 13	1	a1.a1.a1	5e-11	2	1781.76	1781.76	0.0025	1.40311
a1	a1.a1	pepa1a1b19	15_T2_1b_HCDOT	16060	36.33	YGSYGSYGSYGEYGK	K15:+32.0564 - Y1:+32.0564 - Y4:+79.96633	4	4 6 9 10 13	1	a1.a1.a1	0.00021	2	1781.76	1781.76	0.0021	1.17861
a1	a1.a1	pepa1a1b19	01_T1_1a_HCDOT	15761	36.36	YGSYGSYGSYGEYGK	K15:+32.0564 - Y1:+32.0564 - Y13:+79.96633	13	4 6 9 10 13	1	a1.a1.a1	1.4e-13	2	1781.76	1781.76	0.0024	1.34699
a1	a1.a1	pepa1a1b19	17_T2_2b_HCDOT	12850	35.71	YGSYGSYGSYGEYGK	K15:+32.0564 - Y1:+32.0564 - S9:+79.96633	9	4 6 9 10 13	1	a1.a1.a1	0.00031	2	1781.76	1781.76	0.0059	3.31134
a1	a1.a1	pepa1a1b19	40_T4_1a_HCDOT	14471	36.36	YGSYGSYGSYGEYGK	K15:+32.0564 - Y1:+32.0564 - S9:+79.96633	9	4 6 9 10 13	1	a1.a1.a1	1.8e-06	2	1781.76	1781.76	0.0018	1.01024
a1	a1.a1	pepa1a1b19	03_T1_2a_HCDOT	14072	35.95	YGSYGSYGSYGEYGK	K15:+32.0564 - Y1:+32.0564 - Y10:+79.96633	10	4 6 9 10 13	1	a1.a1.a1	3.6e-11	2	1781.76	1781.76	0.0036	2.02048
a1	a1.a1	pepa1a1b19	40_T4_1a_HCDOT	13932	35.5	YGSYGSYGSYGEYGK	K15:+32.0564 - Y1:+32.0564 - Y10:+79.96633	10	4 6 9 10 13	1	a1.a1.a1	2.8e-12	2	1781.76	1781.76	0.0046	2.58172
a1	a1.a1	pepa1a1b19	03_T1_2a_HCDOT	14527	36.75	YGSYGSYGSYGEYGK	K15:+32.0564 - Y1:+32.0564 - S6:+79.96633	6	4 6 9 10 13	1	a1.a1.a1	4.3e-08	2	1781.76	1781.76	0.0026	1.45924
a1	a1.a1	pepa1a1b19	15_T2_1b_HCDOT	15533	35.48	YGSYGSYGSYGEYGK	K15:+32.0564 - Y1:+32.0564 - Y10:+79.96633	10	4 6 9 10 13	1	a1.a1.a1	2.5e-09	2	1781.76	1781.76	0.0046	2.58172
a1	a1.a1	pepa1a1b18	28_T3_1b_HCDOT	14614	36.45	YGSYGSYGSYGEYGK	K15:+28.0313 - Y1:+28.0313 - Y10:+79.96633	10	6 7 9 10 13	1	a1.a1.a1	1.1e-13	2	1773.71	1773.7	0.0009	0.507412
a1	a1.a1	pepa1a1b18	03_T1_2a_HCDOT	14490	36.68	YGSYGSYGSYGEYGK	K15:+28.0313 - Y1:+28.0313 - Y13:+79.96633	13	6 7 9 10 13	1	a1.a1.a1	1.7e-06	2	1773.71	1773.7	0.0056	3.15723
a1	a1.a1	pepa1a1b18	16_T2_2a_HCDOT	13491	36.38	YGSYGSYGSYGEYGK	K15:+28.0313 - Y1:+28.0313 - Y13:+79.96633	13	6 7 9 10 13	1	a1.a1.a1	8.2e-14	2	1773.71	1773.7	0.003	1.69138
a1	a1.a1	pepa1a1b18	42_T4_2a_HCDOT	11387	35.93	YGSYGSYGSYGEYGK	K15:+28.0313 - Y1:+28.0313 - S9:+79.96633	9	6 7 9 10 13	1	a1.a1.a1	5e-07	2	1773.71	1773.7	0.0039	2.19879
a1	a1.a1	pepa1a1b18	40_T4_1a_HCDOT	13960	35.55	YGSYGSYGSYGEYGK	K15:+28.0313 - Y1:+28.0313 - Y10:+79.96633	10	6 7 9 10 13	1	a1.a1.a1	1.1e-12	2	1773.71	1773.7	0.0033	1.86051
a1	a1.a1	pepa1a1b18	15_T2_1b_HCDOT	15580	35.56	YGSYGSYGSYGEYGK	K15:+28.0313 - Y1:+28.0313 - Y10:+79.96633	10	6 7 9 10 13	1	a1.a1.a1	8.1e-09	2	1773.71	1773.7	0.0025	1.40948
a1	a1.a1	pepa1a1b18	28_T3_1b_HCDOT	14110	35.63	YGSYGSYGSYGEYGK	K15:+28.0313 - Y1:+28.0313 - Y10:+79.96633	10	6 7 9 10 13	1	a1.a1.a1	9.6e-12	2	1773.71	1773.7	0.0028	1.57862
a1	a1.a1	pepa1a1b18	27_T3_1a_HCDOT	14177	35.71	YGSYGSYGSYGEYGK	K15:+28.0313 - Y1:+28.0313 - Y10:+79.96633	10	6 7 9 10 13	1	a1.a1.a1	4.7e-13	2	1773.71	1773.7	0.0039	2.19879
a1	a1.a1	pepa1a1b18	27_T3_1a_HCDOT	14656	36.48	YGSYGSYGSYGEYGK	K15:+28.0313 - Y1:+28.0313 - S6:+79.96633	6	6 7 9 10 13	1	a1.a1.a1	1.1e-06	2	1773.71	1773.7	0.0035	1.97327
a1	a1.a1	pepa1a1b18	03_T1_2a_HCDOT	14091	35.98	YGSYGSYGSYGEYGK	K15:+28.0313 - Y1:+28.0313 - Y10:+79.96633	10	6 7 9 10 13	1	a1.a1.a1	1e-08	2	1773.71	1773.7	0.0036	2.02965
a1	a1.a1	pepa1a1b18	04_T1_2b_HCDOT	13505	35.96	YGSYGSYGSYGEYGK	K15:+28.0313 - Y1:+28.0313 - S9:+79.96633	9	6 7 9 10 13	1	a1.a1.a1	6.8e-08	2	1773.71	1773.7	0.0056	3.15723
a1	a1.a1	pepa1a1b18	41_T4_1b_HCDOT	14291	35.78	YGSYGSYGSYGEYGK	K15:+28.0313 - Y1:+28.0313 - Y10:+79.96633	10	6 7 9 10 13	1	a1.a1.a1	1.1e-15	2	1773.71	1773.7	0.0018	1.01482
a1	a1.a1	pepa1a1b18	04_T1_2b_HCDOT	13942	36.75	YGSYGSYGSYGEYGK	K15:+28.0313 - Y1:+28.0313 - S9:+79.96633	9	6 7 9 10 13	1	a1.a1.a1	1.4e-05	2	1773.71	1773.7	0.0028	1.57862
a1	a1.a1	pepa1a1b18	29_T3_2a_HCDOT	11868	36.71	YGSYGSYGSYGEYGK	K15:+28.0313 - Y1:+28.0313 - S9:+79.96633	9	6 7 9 10 13	1	a1.a1.a1	6e-06	2	1773.71	1773.7	0.0022	1.24034
a1	a1.a1	pepa1a1b18	01_T1_1a_HCDOT	15555	36.05	YGSYGSYGSYGEYGK	K15:+28.0313 - Y1:+28.0313 - Y7:+79.96633	7	6 7 9 10 13	1	a1.a1.a1	9.6e-12	2	1773.71	1773.7	0.0035	1.97327
a1	a1.a1	pepa1a1b18	02_T1_1b_HCDOT	17034	36.53	YGSYGSYGSYGEYGK	K15:+28.0313 - Y1:+28.0313 - Y13:+79.96633	13	6 7 9 10 13	1	a1.a1.a1	8.1e-07	2	1773.71	1773.7	0.0037	2.08603
a1	a1.a1	pepa1a1b18	14_T2_1a_HCDOT	15258	36	YGSYGSYGSYGEYGK	K15:+28.0313 - Y1:+28.0313 - Y13:+79.96633	13	6 7 9 10 13	1	a1.a1.a1	2.7e-09	2	1773.71	1773.7	0.003	1.69138
a1	a1.a1	pepa1a1b11	01_T1_1a_HCDOT	15605	36.13	VDMTVDKYGSYGSYGSYGEYGKK	K7:+32.0564 - K22:+32.0564 - K23:+32.0564 - V1:+32.0564 - S13:+79.96633	13	4 8 10 11 13 14 16 17 20	1	a1.a1.a1	1.2e-05	3	2762.34	2762.34	0.0055	1.99107
a1	a1.a1	pepa1a1b11	27_T3_1a_HCDOT	14291	35.9	VDMTVDKYGSYGSYGSYGEYGKK	K7:+32.0564 - K22:+32.0564 - K23:+32.0564 - V1:+32.0564 - S16:+79.96633	16	4 8 10 11 13 14 16 17 20	1	a1.a1.a1	1e-15	3	2762.33	2762.34	-0.0068	-2.46168
a1	a1.a1	pepa1a1b11	02_T1_1b_HCDOT	17027	36.51	VDMTVDKYGSYGSYGSYGEYGKK	K7:+32.0564 - K22:+32.0564 - K23:+32.0564 - V1:+32.0564 - Y20:+79.96633	20	4 8 10 11 13 14 16 17 20	1	a1.a1.a1	2e-08	3	2762.35	2762.34	0.009	3.25811
a1	a1.a1	pepa1a1b11	28_T3_1b_HCDOT	14401	36.1	VDMTVDKYGSYGSYGSYGEYGKK	K7:+32.0564 - K22:+32.0564 - K23:+32.0564 - V1:+32.0564 - S16:+79.96633	16	4 8 10 11 13 14 16 17 20	1	a1.a1.a1	2.9e-14	3	2762.34	2762.34	-0.0009	-0.325811
a1	a1.a1	pepa1a1b11	28_T3_1b_HCDOT	14834	36.8	VDMTVDKYGSYGSYGSYGEYGKK	K7:+32.0564 - K22:+32.0564 - K23:+32.0564 - V1:+32.0564 - Y20:+79.96633	20	4 8 10 11 13 14 16 17 20	1	a1.a1.a1	2.1e-11	3	2762.34	2762.34	0.0051	1.84626
a1	a1.a1	pepa1a1b11	40_T4_1a_HCDOT	14243	36	VDMTVDKYGSYGSYGSYGEYGKK	K7:+32.0564 - K22:+32.0564 - K23:+32.0564 - V1:+32.0564 - Y14:+79.96633	14	4 8 10 11 13 14 16 17 20	1	a1.a1.a1	1.4e-07	3	2762.34	2762.34	0.002	0.724025
a1	a1.a1	pepa1a1b13	14_T2_1a_HCDOT	15523	36.4	VDMTVDKYGSYGSYGSYGEYGKK	K7:+28.0313 - K22:+28.0313 - K23:+28.0313 - V1:+28.0313 - S10:+79.96633 - Y17:+79.96633	10 17	4 8 10 11 13 14 16 17 20	1	a1.a1.a1	1e-15	3	2826.21	2826.2	0.0053	1.87531
a1	a1.a1	pepa1a1b13	15_T2_1b_HCDOT	16104	36.4	VDMTVDKYGSYGSYGSYGEYGKK	K7:+28.0313 - K22:+28.0313 - K23:+28.0313 - V1:+28.0313 - Y8:+79.96633 - Y17:+79.96633	8 17	4 8 10 11 13 14 16 17 20	1	a1.a1.a1	1.8e-12	3	2826.21	2826.2	0.011	3.89215
a1	a1.a1	pepa1a1b13	40_T4_1a_HCDOT	14538	36.48	VDMTVDKYGSYGSYGSYGEYGKK	K7:+28.0313 - K22:+28.0313 - K23:+28.0313 - V1:+28.0313 - Y8:+79.96633 - Y17:+79.96633	8 17	4 8 10 11 13 14 16 17 20	1	a1.a1.a1	1.7e-07	3	2826.21	2826.2	0.0045	1.59224
a1	a1.a1	pepa1a1b13	28_T3_1b_HCDOT	15122	37.25	VDMTVDKYGSYGSYGSYGEYGKK	K7:+28.0313 - K22:+28.0313 - K23:+28.0313 - V1:+28.0313 - S10:+79.96633 - Y20:+79.96633	10 20	4 8 10 11 13 14 16 17 20	1	a1.a1.a1	1.2e-11	3	2826.2	2826.2	0.0023	0.813813
a1	a1.a1	pepa1a1b13	01_T1_1a_HCDOT	16378	37.26	VDMTVDKYGSYGSYGSYGEYGKK	K7:+28.0313 - K22:+28.0313 - K23:+28.0313 - V1:+28.0313 - S13:+79.96633 - Y20:+79.96633	13 20	4 8 10 11 13 14 16 17 20	1	a1.a1.a1	4.6e-05	3	2826.2	2826.2	0.0016	0.566131
a1	a1.a1	pepa1a1b13	41_T4_1b_HCDOT	14952	36.85	VDMTVDKYGSYGSYGSYGEYGKK	K7:+28.0313 - K22:+28.0313 - K23:+28.0313 - V1:+28.0313 - S16:+79.96633 - Y11:+79.96633	11 16	4 8 10 11 13 14 16 17 20	1	a1.a1.a1	9.6e-11	3	2826.21	2826.2	0.0056	1.98146
a1	a1.a1	pepa1a1b13	27_T3_1a_HCDOT	15197	37.31	VDMTVDKYGSYGSYGSYGEYGKK	K7:+28.0313 - K22:+28.0313 - K23:+28.0313 - V1:+28.0313 - S13:+79.96633 - Y20:+79.96633	13 20	4 8 10 11 13 14 16 17 20	1	a1.a1.a1	1.1e-06	3	2826.2	2826.2	0.0014	0.495364
a1	a1.a1	pepa1a1b13	15_T2_1b_HCDOT	16619	37.21	VDMTVDKYGSYGSYGSYGEYGKK	K7:+28.0313 - K22:+28.0313 - K23:+28.0313 - V1:+28.0313 - Y11:+79.96633 - Y20:+79.96633	11 20	4 8 10 11 13 14 16 17 20	1	a1.a1.a1	4.2e-11	3	2826.2	2826.2	0.0023	0.813813
a1	a1.a1	pepa1a1b13	15_T2_1b_HCDOT	16547	37.1	VDMTVDKYGSYGSYGSYGEYGKK	K7:+28.0313 - K22:+28.0313 - K23:+28.0313 - V1:+28.0313 - Y11:+79.96633 - Y20:+79.96633	11 20	4 8 10 11 13 14 16 17 20	1	a1.a1.a1	1e-15	3	2826.21	2826.2	0.0049	1.73378
a1	a1.a1	pepa1a1b13	41_T4_1b_HCDOT	15405	37.56	VDMTVDKYGSYGSYGSYGEYGKK	K7:+28.0313 - K22:+28.0313 - K23:+28.0313 - V1:+28.0313 - Y14:+79.96633 - Y20:+79.96633	14 20	4 8 10 11 13 14 16 17 20	1	a1.a1.a1	1.8e-06	3	2826.21	2826.2	0.0091	3.21987
a1	a1.a1	pepa1a1b13	40_T4_1a_HCDOT	14974	37.16	VDMTVDKYGSYGSYGSYGEYGKK	K7:+28.0313 - K22:+28.0313 - K23:+28.0313 - V1:+28.0313 - Y8:+79.96633 - Y20:+79.96633	8 20	4 8 10 11 13 14 16 17 20	1	a1.a1.a1	1.9e-13	3	2826.21	2826.2	0.0065	2.29991
a1	a1.a1	pepa1a1b13	27_T3_1a_HCDOT	14735	36.6	VDMTVDKYGSYGSYGSYGEYGKK	K7:+28.0313 - K22:+28.0313 - K23:+28.0313 - V1:+28.0313 - Y11:+79.96633 - Y17:+79.96633	11 17	4 8 10 11 13 14 16 17 20	1	a1.a1.a1	4.9e-12	3	2826.21	2826.2	0.0051	1.80454
a1	a1.a1	pepa1a1b13	02_T1_1b_HCDOT	17192	36.76	VDMTVDKYGSYGSYGSYGEYGKK	K7:+28.0313 - K22:+28.0313 - K23:+28.0313 - V1:+28.0313 - Y11:+79.96633 - Y17:+79.96633	11 17	4 8 10 11 13 14 16 17 20	1	a1.a1.a1	5.6e-13	3	2826.21	2826.2	0.0033	1.16764
a1	a1.a1	pepa1a1b23	40_T4_1a_HCDOT	15824	38.48	YGSYGSYGSYGEYGK	K15:+36.0756 - Y1:+36.0756 - Y4:+79.96633 - Y13:+79.96633	4 13	3 4 6 7 10 13	1	a1.a1.a1	0.00083	2	1869.77	1869.76	0.0068	3.63683
a1	a1.a1	pepa1a1b23	01_T1_1a_HCDOT	16707	37.75	YGSYGSYGSYGEYGK	K15:+36.0756 - Y1:+36.0756 - S6:+79.96633 - Y10:+79.96633	6 10	3 4 6 7 10 13	1	a1.a1.a1	4.5e-06	2	1869.77	1869.76	0.007	3.7438
a1	a1.a1	pepa1a1b23	02_T1_1b_HCDOT	18315	38.43	YGSYGSYGSYGEYGK	K15:+36.0756 - Y1:+36.0756 - Y4:+79.96633 - Y13:+79.96633	4 13	3 4 6 7 10 13	1	a1.a1.a1	4.2e-06	2	1869.76	1869.76	0.004	2.13931
a1	a1.a1	pepa1a1b23	02_T1_1b_HCDOT	17823	37.71	YGSYGSYGSYGEYGK	K15:+36.0756 - Y1:+36.0756 - S6:+79.96633 - Y10:+79.96633	6 10	3 4 6 7 10 13	1	a1.a1.a1	0.00011	2	1869.76	1869.76	0.002	1.06966
a1	a1.a1	pepa1a1b23	28_T3_1b_HCDOT	15329	37.58	YGSYGSYGSYGEYGK	K15:+36.0756 - Y1:+36.0756 - Y7:+79.96633 - Y10:+79.96633	7 10	3 4 6 7 10 13	1	a1.a1.a1	2.6e-08	2	1869.76	1869.76	0.0013	0.695277
a1	a1.a1	pepa1a1b23	15_T2_1b_HCDOT	17215	38.13	YGSYGSYGSYGEYGK	K15:+36.0756 - Y1:+36.0756 - Y4:+79.96633 - Y13:+79.96633	4 13	3 4 6 7 10 13	1	a1.a1.a1	0.00026	2	1869.76	1869.76	0.0023	1.2301
a1	a1.a1	pepa1a1b23	14_T2_1a_HCDOT	16312	37.58	YGSYGSYGSYGEYGK	K15:+36.0756 - Y1:+36.0756 - S6:+79.96633 - Y10:+79.96633	6 10	3 4 6 7 10 13	1	a1.a1.a1	2.3e-06	2	1869.76	1869.76	0.0044	2.35324
a1	a1.a1	pepa1a1b23	15_T2_1b_HCDOT	16749	37.41	YGSYGSYGSYGEYGK	K15:+36.0756 - Y1:+36.0756 - Y7:+79.96633 - Y10:+79.96633	7 10	3 4 6 7 10 13	1	a1.a1.a1	1.4e-06	2	1869.76	1869.76	0.0018	0.962691
a1	a1.a1	pepa1a1b21	28_T3_1b_HCDOT	15360	37.63	YGSYGSYGSYGEYGK	K15:+28.0313 - Y1:+28.0313 - Y7:+79.96633 - Y10:+79.96633	7 10	1 4 6 7 10 13	1	a1.a1.a1	6.8e-06	2	1853.67	1853.67	0.0014	0.755258
a1	a1.a1	pepa1a1b21	40_T4_1a_HCDOT	15310	37.7	YGSYGSYGSYGEYGK	K15:+28.0313 - Y1:+28.0313 - Y7:+79.96633 - Y10:+79.96633	7 10	1 4 6 7 10 13	1	a1.a1.a1	1.4e-06	2	1853.67	1853.67	0.0038	2.04999
a1	a1.a1	pepa1a1b21	15_T2_1b_HCDOT	16813	37.51	YGSYGSYGSYGEYGK	K15:+28.0313 - Y1:+28.0313 - Y7:+79.96633 - Y10:+79.96633	7 10	1 4 6 7 10 13	1	a1.a1.a1	1.1e-06	2	1853.68	1853.67	0.0058	3.12893
a1	a1.a1	pepa1a1b21	28_T3_1b_HCDOT	15810	38.33	YGSYGSYGSYGEYGK	K15:+28.0313 - Y1:+28.0313 - Y1:+79.96633 - Y13:+79.96633	1 13	1 4 6 7 10 13	1	a1.a1.a1	7e-05	2	1853.67	1853.67	0.001	0.53947
a1	a1.a1	pepa1a1b21	01_T1_1a_HCDOT	16768	37.83	YGSYGSYGSYGEYGK	K15:+28.0313 - Y1:+28.0313 - S6:+79.96633 - Y13:+79.96633	6 13	1 4 6 7 10 13	1	a1.a1.a1	5.5e-06	2	1853.68	1853.67	0.0065	3.50656
a1	a1.a1	pepa1a1b21	41_T4_1b_HCDOT	16002	38.5	YGSYGSYGSYGEYGK	K15:+28.0313 - Y1:+28.0313 - Y4:+79.96633 - Y13:+79.96633	4 13	1 4 6 7 10 13	1	a1.a1.a1	7e-06	2	1853.67	1853.67	0.0029	1.56446
a1	a1.a1	pepa1a1b21	02_T1_1b_HCDOT	17888	37.81	YGSYGSYGSYGEYGK	K15:+28.0313 - Y1:+28.0313 - Y7:+79.96633 - Y13:+79.96633	7 13	1 4 6 7 10 13	1	a1.a1.a1	3.3e-06	2	1853.68	1853.67	0.0054	2.91314
a1	a1.a1	pepa1a1b21	41_T4_1b_HCDOT	15541	37.78	YGSYGSYGSYGEYGK	K15:+28.0313 - Y1:+28.0313 - Y7:+79.96633 - Y13:+79.96633	7 13	1 4 6 7 10 13	1	a1.a1.a1	2.8e-05	2	1853.68	1853.67	0.0047	2.53551
a1	a1.a1	pepa1a1b17	27_T3_1a_HCDOT	15643	38	VDMTVDKYGSYGSYGSYGEYGKK	K7:+32.0564 - K22:+32.0564 - K23:+32.0564 - V1:+32.0564 - Y8:+79.96633 - Y11:+79.96633 - Y20:+79.96633	8 11 20	4 8 10 11 13 14 16 17 20	1	a1.a1.a1	3.4e-05	3	2922.27	2922.27	0.0041	1.40302
a1	a1.a1	pepa1a1b17	02_T1_1b_HCDOT	18237	38.31	VDMTVDKYGSYGSYGSYGEYGKK	K7:+32.0564 - K22:+32.0564 - K23:+32.0564 - V1:+32.0564 - S13:+79.96633 - Y17:+79.96633 - Y20:+79.96633	13 17 20	4 8 10 11 13 14 16 17 20	1	a1.a1.a1	5.1e-05	3	2922.27	2922.27	-0.0012	-0.41064
a1	a1.a1	pepa1a1b17	28_T3_1b_HCDOT	15640	38.06	VDMTVDKYGSYGSYGSYGEYGKK	K7:+32.0564 - K22:+32.0564 - K23:+32.0564 - V1:+32.0564 - S10:+79.96633 - Y11:+79.96633 - Y20:+79.96633	10 11 20	4 8 10 11 13 14 16 17 20	1	a1.a1.a1	3.1e-09	3	2922.27	2922.27	0.0019	0.65018
a1	a1.a1	pepa1a1b17	01_T1_1a_HCDOT	16862	37.98	VDMTVDKYGSYGSYGSYGEYGKK	K7:+32.0564 - K22:+32.0564 - K23:+32.0564 - V1:+32.0564 - T4:+79.96633 - Y14:+79.96633 - Y20:+79.96633	4 14 20	4 8 10 11 13 14 16 17 20	1	a1.a1.a1	2.5e-05	3	2922.28	2922.27	0.0094	3.21668
a1	a1.a1	pepa1a1b17	41_T4_1b_HCDOT	15924	38.38	VDMTVDKYGSYGSYGSYGEYGKK	K7:+32.0564 - K22:+32.0564 - K23:+32.0564 - V1:+32.0564 - S16:+79.96633 - Y14:+79.96633 - Y20:+79.96633	14 16 20	4 8 10 11 13 14 16 17 20	1	a1.a1.a1	1.8e-11	3	2922.28	2922.27	0.0065	2.2243
a1	a1.a1	pepa1a1b17	40_T4_1a_HCDOT	15592	38.13	VDMTVDKYGSYGSYGSYGEYGKK	K7:+32.0564 - K22:+32.0564 - K23:+32.0564 - V1:+32.0564 - S10:+79.96633 - Y8:+79.96633 - Y20:+79.96633	8 10 20	4 8 10 11 13 14 16 17 20	1	a1.a1.a1	2.1e-06	3	2922.28	2922.27	0.007	2.3954
a1	a1.a1	pepa1a1b16	14_T2_1a_HCDOT	16401	37.71	VDMTVDKYGSYGSYGSYGEYGKK	K7:+28.0313 - K22:+28.0313 - K23:+28.0313 - V1:+28.0313 - Y8:+79.96633 - Y11:+79.96633 - Y20:+79.96633	8 11 20	4 8 10 11 13 14 17 20	1	a1.a1.a1	0.00021	3	2906.17	2906.17	0.002	0.688191
a1	a1.a1	pepa1a1b16	01_T1_1a_HCDOT	16893	38.01	VDMTVDKYGSYGSYGSYGEYGKK	K7:+28.0313 - K22:+28.0313 - K23:+28.0313 - V1:+28.0313 - Y8:+79.96633 - Y14:+79.96633 - Y20:+79.96633	8 14 20	4 8 10 11 13 14 17 20	1	a1.a1.a1	0.00054	3	2906.17	2906.17	0.0038	1.30756
a1	a1.a1	pepa1a1b16	28_T3_1b_HCDOT	15584	37.98	VDMTVDKYGSYGSYGSYGEYGKK	K7:+28.0313 - K22:+28.0313 - K23:+28.0313 - V1:+28.0313 - S13:+79.96633 - Y11:+79.96633 - Y20:+79.96633	11 13 20	4 8 10 11 13 14 17 20	1	a1.a1.a1	1.2e-05	3	2906.17	2906.17	0.0031	1.0667
a1	a1.a1	pepa1a1b16	02_T1_1b_HCDOT	18083	38.1	VDMTVDKYGSYGSYGSYGEYGKK	K7:+28.0313 - K22:+28.0313 - K23:+28.0313 - V1:+28.0313 - S10:+79.96633 - Y11:+79.96633 - Y17:+79.96633	10 11 17	4 8 10 11 13 14 17 20	1	a1.a1.a1	9.9e-08	3	2906.17	2906.17	0.004	1.37638
a1	a1.a1	pepa1a1a1	40_T4_1a_HCDOT	16564	39.65	VDMTVDKYGSYGSYGSYGEYGK	K7:+28.0313 - K22:+28.0313 - V1:+28.0313 - Y14:+79.96633	14	10 11 13 14 16	1	a1.a1.a1	1e-15	3	2590.12	2590.11	0.0073	2.81841
a1	a1.a1	pepa1a1a1	15_T2_1b_HCDOT	18256	39.75	VDMTVDKYGSYGSYGSYGEYGK	K7:+28.0313 - K22:+28.0313 - V1:+28.0313 - Y14:+79.96633	14	10 11 13 14 16	1	a1.a1.a1	1e-15	3	2590.11	2590.11	0.002	0.772168
a1	a1.a1	pepa1a1a1	02_T1_1b_HCDOT	19288	39.88	VDMTVDKYGSYGSYGSYGEYGK	K7:+28.0313 - K22:+28.0313 - V1:+28.0313 - S16:+79.96633	16	10 11 13 14 16	1	a1.a1.a1	3.6e-15	3	2590.11	2590.11	0.005	1.93042
a1	a1.a1	pepa1a1a1	01_T1_1a_HCDOT	18052	39.71	VDMTVDKYGSYGSYGSYGEYGK	K7:+28.0313 - K22:+28.0313 - V1:+28.0313 - S13:+79.96633	13	10 11 13 14 16	1	a1.a1.a1	1e-15	2	2590.11	2590.11	0.0022	0.849385
a1	a1.a1	pepa1a1a1	14_T2_1a_HCDOT	17539	39.45	VDMTVDKYGSYGSYGSYGEYGK	K7:+28.0313 - K22:+28.0313 - V1:+28.0313 - S16:+79.96633	16	10 11 13 14 16	1	a1.a1.a1	5.5e-15	3	2590.11	2590.11	0.0044	1.69877
a1	a1.a1	pepa1a1a1	01_T1_1a_HCDOT	18010	39.66	VDMTVDKYGSYGSYGSYGEYGK	K7:+28.0313 - K22:+28.0313 - V1:+28.0313 - Y14:+79.96633	14	10 11 13 14 16	1	a1.a1.a1	1.8e-13	3	2590.11	2590.11	0.0011	0.424692
a1	a1.a1	pepa1a1a1	41_T4_1b_HCDOT	16989	40.03	VDMTVDKYGSYGSYGSYGEYGK	K7:+28.0313 - K22:+28.0313 - V1:+28.0313 - Y14:+79.96633	14	10 11 13 14 16	1	a1.a1.a1	4.5e-11	3	2590.12	2590.11	0.0059	2.2779
a1	a1.a1	pepa1a1a1	41_T4_1b_HCDOT	17222	40.4	VDMTVDKYGSYGSYGSYGEYGK	K7:+28.0313 - K22:+28.0313 - V1:+28.0313 - S10:+79.96633	10	10 11 13 14 16	1	a1.a1.a1	1e-15	2	2590.12	2590.11	0.0063	2.43233
a1	a1.a1	pepa1a1a1	27_T3_1a_HCDOT	16713	39.66	VDMTVDKYGSYGSYGSYGEYGK	K7:+28.0313 - K22:+28.0313 - V1:+28.0313 - S16:+79.96633	16	10 11 13 14 16	1	a1.a1.a1	1e-15	3	2590.11	2590.11	0.002	0.772168
a1	a1.a1	pepa1a1a2	27_T3_1a_HCDOT	17106	40.28	VDMTVDKYGSYGSYGSYGEYGK	K7:+32.0564 - K22:+32.0564 - V1:+32.0564 - Y20:+79.96633	20	10 11 14 16 17 20	1	a1.a1.a1	2.3e-05	3	2602.19	2602.19	0.0053	2.03675
a1	a1.a1	pepa1a1a2	15_T2_1b_HCDOT	18202	39.66	VDMTVDKYGSYGSYGSYGEYGK	K7:+32.0564 - K22:+32.0564 - V1:+32.0564 - Y14:+79.96633	14	10 11 14 16 17 20	1	a1.a1.a1	8.3e-06	3	2602.19	2602.19	0.0033	1.26816
a1	a1.a1	pepa1a1a2	40_T4_1a_HCDOT	16953	40.26	VDMTVDKYGSYGSYGSYGEYGK	K7:+32.0564 - K22:+32.0564 - V1:+32.0564 - Y17:+79.96633	17	10 11 14 16 17 20	1	a1.a1.a1	4.8e-10	3	2602.19	2602.19	0.0097	3.72764
a1	a1.a1	pepa1a1a2	28_T3_1b_HCDOT	16637	39.63	VDMTVDKYGSYGSYGSYGEYGK	K7:+32.0564 - K22:+32.0564 - V1:+32.0564 - S16:+79.96633	16	10 11 14 16 17 20	1	a1.a1.a1	9.4e-11	3	2602.18	2602.19	-0.0004	-0.153717
a1	a1.a1	pepa1a1a2	01_T1_1a_HCDOT	18011	39.66	VDMTVDKYGSYGSYGSYGEYGK	K7:+32.0564 - K22:+32.0564 - V1:+32.0564 - Y14:+79.96633	14	10 11 14 16 17 20	1	a1.a1.a1	4.6e-13	3	2602.19	2602.19	0.0035	1.34502
a1	a1.a1	pepa1a1a2	27_T3_1a_HCDOT	16663	39.58	VDMTVDKYGSYGSYGSYGEYGK	K7:+32.0564 - K22:+32.0564 - V1:+32.0564 - S16:+79.96633	16	10 11 14 16 17 20	1	a1.a1.a1	5.2e-13	3	2602.19	2602.19	0.0057	2.19047
a1	a1.a1	pepa1a1a2	40_T4_1a_HCDOT	16527	39.58	VDMTVDKYGSYGSYGSYGEYGK	K7:+32.0564 - K22:+32.0564 - V1:+32.0564 - S16:+79.96633	16	10 11 14 16 17 20	1	a1.a1.a1	4.2e-13	3	2602.19	2602.19	0.008	3.07434
a1	a1.a1	pepa1a1a2	41_T4_1b_HCDOT	17142	40.26	VDMTVDKYGSYGSYGSYGEYGK	K7:+32.0564 - K22:+32.0564 - V1:+32.0564 - S10:+79.96633	10	10 11 14 16 17 20	1	a1.a1.a1	8.1e-11	3	2602.19	2602.19	0.0053	2.03675
a1	a1.a1	pepa1a1a4	01_T1_1a_HCDOT	18170	39.9	VDMTVDKYGSYGSYGSYGEYGK	K7:+36.0756 - K22:+36.0756 - V1:+36.0756 - Y11:+79.96633	11	10 11 14 16	1	a1.a1.a1	4.9e-08	3	2614.25	2614.24	0.012	4.59024
a1	a1.a1	pepa1a1a4	40_T4_1a_HCDOT	16605	39.71	VDMTVDKYGSYGSYGSYGEYGK	K7:+36.0756 - K22:+36.0756 - V1:+36.0756 - S16:+79.96633	16	10 11 14 16	1	a1.a1.a1	1e-15	3	2614.25	2614.24	0.0052	1.9891
a1	a1.a1	pepa1a1a4	28_T3_1b_HCDOT	16625	39.6	VDMTVDKYGSYGSYGSYGEYGK	K7:+36.0756 - K22:+36.0756 - V1:+36.0756 - S16:+79.96633	16	10 11 14 16	1	a1.a1.a1	3.5e-10	3	2614.24	2614.24	0.0019	0.726788
a1	a1.a1	pepa1a1a4	14_T2_1a_HCDOT	17522	39.41	VDMTVDKYGSYGSYGSYGEYGK	K7:+36.0756 - K22:+36.0756 - V1:+36.0756 - Y14:+79.96633	14	10 11 14 16	1	a1.a1.a1	1e-15	3	2614.24	2614.24	0.0008	0.306016
a1	a1.a1	pepa1a1a5	14_T2_1a_HCDOT	18731	41.28	VDMTVDKYGSYGSYGSYGEYGK	K7:+28.0313 - K22:+28.0313 - V1:+28.0313 - Y8:+79.96633 - Y14:+79.96633	8 14	8 10 11 13 14 17 20	1	a1.a1.a1	1.1e-08	3	2670.08	2670.08	0.0021	0.786494
a1	a1.a1	pepa1a1a5	01_T1_1a_HCDOT	19078	41.3	VDMTVDKYGSYGSYGSYGEYGK	K7:+28.0313 - K22:+28.0313 - V1:+28.0313 - S10:+79.96633 - Y17:+79.96633	10 17	8 10 11 13 14 17 20	1	a1.a1.a1	2.9e-08	3	2670.07	2670.08	-0.0016	-0.599234
a1	a1.a1	pepa1a1a5	40_T4_1a_HCDOT	17988	41.93	VDMTVDKYGSYGSYGSYGEYGK	K7:+28.0313 - K22:+28.0313 - V1:+28.0313 - Y8:+79.96633 - Y20:+79.96633	8 20	8 10 11 13 14 17 20	1	a1.a1.a1	1.5e-05	3	2670.08	2670.08	0.0059	2.20967
a1	a1.a1	pepa1a1a5	41_T4_1b_HCDOT	17914	41.51	VDMTVDKYGSYGSYGSYGEYGK	K7:+28.0313 - K22:+28.0313 - V1:+28.0313 - Y8:+79.96633 - Y14:+79.96633	8 14	8 10 11 13 14 17 20	1	a1.a1.a1	3.7e-11	3	2670.08	2670.08	0.0059	2.20967
a1	a1.a1	pepa1a1a5	27_T3_1a_HCDOT	17699	41.23	VDMTVDKYGSYGSYGSYGEYGK	K7:+28.0313 - K22:+28.0313 - V1:+28.0313 - Y11:+79.96633 - Y17:+79.96633	11 17	8 10 11 13 14 17 20	1	a1.a1.a1	7.4e-08	3	2670.08	2670.08	-0.0001	-0.0374521
a1	a1.a1	pepa1a1a5	15_T2_1b_HCDOT	19171	41.2	VDMTVDKYGSYGSYGSYGEYGK	K7:+28.0313 - K22:+28.0313 - V1:+28.0313 - S10:+79.96633 - Y17:+79.96633	10 17	8 10 11 13 14 17 20	1	a1.a1.a1	2.7e-10	3	2670.08	2670.08	-0.001	-0.374521
a1	a1.a1	pepa1a1a5	27_T3_1a_HCDOT	18152	41.95	VDMTVDKYGSYGSYGSYGEYGK	K7:+28.0313 - K22:+28.0313 - V1:+28.0313 - Y14:+79.96633 - Y20:+79.96633	14 20	8 10 11 13 14 17 20	1	a1.a1.a1	0.0003	3	2670.07	2670.08	-0.0023	-0.861399
a1	a1.a1	pepa1a1a5	02_T1_1b_HCDOT	20324	41.5	VDMTVDKYGSYGSYGSYGEYGK	K7:+28.0313 - K22:+28.0313 - V1:+28.0313 - Y8:+79.96633 - Y17:+79.96633	8 17	8 10 11 13 14 17 20	1	a1.a1.a1	9.6e-09	3	2670.08	2670.08	0.0059	2.20967
a1	a1.a1	pepa1a1a6	28_T3_1b_HCDOT	17678	41.33	VDMTVDKYGSYGSYGSYGEYGK	K7:+32.0564 - K22:+32.0564 - V1:+32.0564 - S13:+79.96633 - Y8:+79.96633	8 13	8 10 11 13 14 16 17	1	a1.a1.a1	1.1e-06	3	2682.15	2682.15	0.0018	0.671103
a1	a1.a1	pepa1a1a6	01_T1_1a_HCDOT	19123	41.36	VDMTVDKYGSYGSYGSYGEYGK	K7:+32.0564 - K22:+32.0564 - V1:+32.0564 - S10:+79.96633 - S16:+79.96633	10 16	8 10 11 13 14 16 17	1	a1.a1.a1	1.8e-11	3	2682.16	2682.15	0.0059	2.19973
a1	a1.a1	pepa1a1a6	01_T1_1a_HCDOT	19306	41.65	VDMTVDKYGSYGSYGSYGEYGK	K7:+32.0564 - K22:+32.0564 - V1:+32.0564 - S13:+79.96633 - Y17:+79.96633	13 17	8 10 11 13 14 16 17	1	a1.a1.a1	9.7e-06	3	2682.16	2682.15	0.004	1.49134
a1	a1.a1	pepa1a1a3	02_T1_1b_HCDOT	16784	36.16	VDMTVDKYGSYGSYGSYGEYGK	K7:+28.0313 - K22:+28.0313 - V1:+28.0313 - M3:+15.99491 - Y11:+79.96633	11	11	1	a1.a1.a1	9e-08	3	2606.11	2606.1	0.0065	2.49414
a1	a1.a1	pepa1a1b12	28_T3_1b_HCDOT	14777	36.71	VDMTVDKYGSYGSYGSYGEYGKK	K7:+36.0756 - K22:+36.0756 - K23:+36.0756 - V1:+36.0756 - Y20:+79.96633	20	8 10 11 13 16 17 20	1	a1.a1.a1	4.2e-10	3	2778.42	2778.41	0.0037	1.3317
a1	a1.a1	pepa1a1b12	14_T2_1a_HCDOT	15227	35.95	VDMTVDKYGSYGSYGSYGEYGKK	K7:+36.0756 - K22:+36.0756 - K23:+36.0756 - V1:+36.0756 - Y17:+79.96633	17	8 10 11 13 16 17 20	1	a1.a1.a1	7e-07	3	2778.41	2778.41	-0.0007	-0.251942
a1	a1.a1	pepa1a1b12	02_T1_1b_HCDOT	17015	36.5	VDMTVDKYGSYGSYGSYGEYGKK	K7:+36.0756 - K22:+36.0756 - K23:+36.0756 - V1:+36.0756 - S10:+79.96633	10	8 10 11 13 16 17 20	1	a1.a1.a1	9.2e-05	3	2778.41	2778.41	-0.0005	-0.179959
a1	a1.a1	pepa1a1b12	27_T3_1a_HCDOT	14242	35.81	VDMTVDKYGSYGSYGSYGEYGKK	K7:+36.0756 - K22:+36.0756 - K23:+36.0756 - V1:+36.0756 - Y17:+79.96633	17	8 10 11 13 16 17 20	1	a1.a1.a1	1.5e-07	3	2778.41	2778.41	0.0015	0.539876
a1	a1.a1	pepa1a1b12	15_T2_1b_HCDOT	15962	36.16	VDMTVDKYGSYGSYGSYGEYGKK	K7:+36.0756 - K22:+36.0756 - K23:+36.0756 - V1:+36.0756 - Y8:+79.96633	8	8 10 11 13 16 17 20	1	a1.a1.a1	9.6e-09	3	2778.41	2778.41	-0.0022	-0.791819
a1	a1.a1	pepa1a1b12	40_T4_1a_HCDOT	14536	36.46	VDMTVDKYGSYGSYGSYGEYGKK	K7:+36.0756 - K22:+36.0756 - K23:+36.0756 - V1:+36.0756 - Y20:+79.96633	20	8 10 11 13 16 17 20	1	a1.a1.a1	3.7e-08	3	2778.42	2778.41	0.0084	3.02331
a1	a1.a1	pepa1a1b12	40_T4_1a_HCDOT	14098	35.76	VDMTVDKYGSYGSYGSYGEYGKK	K7:+36.0756 - K22:+36.0756 - K23:+36.0756 - V1:+36.0756 - S16:+79.96633	16	8 10 11 13 16 17 20	1	a1.a1.a1	5.9e-05	3	2778.41	2778.41	0.0009	0.323926
a1	a1.a1	pepa1a1b12	28_T3_1b_HCDOT	14356	36.01	VDMTVDKYGSYGSYGSYGEYGKK	K7:+36.0756 - K22:+36.0756 - K23:+36.0756 - V1:+36.0756 - Y17:+79.96633	17	8 10 11 13 16 17 20	1	a1.a1.a1	8.4e-08	3	2778.42	2778.41	0.0037	1.3317
a1	a1.a1	pepa1a1b12	27_T3_1a_HCDOT	14887	36.83	VDMTVDKYGSYGSYGSYGEYGKK	K7:+36.0756 - K22:+36.0756 - K23:+36.0756 - V1:+36.0756 - Y20:+79.96633	20	8 10 11 13 16 17 20	1	a1.a1.a1	8.8e-08	3	2778.41	2778.41	0.0008	0.287934
a1	a1.a1	pepa1a1b12	41_T4_1b_HCDOT	15151	37.16	VDMTVDKYGSYGSYGSYGEYGKK	K7:+36.0756 - K22:+36.0756 - K23:+36.0756 - V1:+36.0756 - Y20:+79.96633	20	8 10 11 13 16 17 20	1	a1.a1.a1	2.4e-15	3	2778.42	2778.41	0.0052	1.87157
a1	a1.a1	pepa1a1a9	41_T4_1b_HCDOT	14937	36.83	VDMTVDKYGSYGSYGSYGEYGKK	K7:+28.0313 - K22:+28.0313 - K23:+28.0313 - V1:+28.0313 - Y20:+79.96633	20	14 20	1	a1.a1.a1	4.2e-09	3	2746.24	2746.24	0.0072	2.62177
a1	a1.a1	pepa1a1a9	14_T2_1a_HCDOT	15035	35.65	VDMTVDKYGSYGSYGSYGEYGKK	K7:+28.0313 - K22:+28.0313 - K23:+28.0313 - V1:+28.0313 - Y14:+79.96633	14	14 20	1	a1.a1.a1	1e-15	3	2746.24	2746.24	0.0028	1.01958
a1	a1.a1	pepa1a1a9	02_T1_1b_HCDOT	17255	36.86	VDMTVDKYGSYGSYGSYGEYGKK	K7:+28.0313 - K22:+28.0313 - K23:+28.0313 - V1:+28.0313 - Y20:+79.96633	20	14 20	1	a1.a1.a1	2.6e-05	3	2746.24	2746.24	0.0056	2.03915
a1	a1.a1	pepa1a1b15	02_T1_1b_HCDOT	17432	37.13	VDMTVDKYGSYGSYGSYGEYGKK	K7:+36.0756 - K22:+36.0756 - K23:+36.0756 - V1:+36.0756 - Y8:+79.96633 - Y20:+79.96633	8 20	8 10 11 13 14 20	1	a1.a1.a1	9.4e-08	3	2858.38	2858.38	0.0002	0.0699697
a1	a1.a1	pepa1a1b14	27_T3_1a_HCDOT	15125	37.2	VDMTVDKYGSYGSYGSYGEYGKK	K7:+32.0564 - K22:+32.0564 - K23:+32.0564 - V1:+32.0564 - S16:+79.96633 - Y20:+79.96633	16 20	8 10 11 16 17 20	1	a1.a1.a1	2.4e-07	3	2842.31	2842.3	0.0037	1.30176
a1	a1.a1	pepa1a1b14	40_T4_1a_HCDOT	14496	36.4	VDMTVDKYGSYGSYGSYGEYGKK	K7:+32.0564 - K22:+32.0564 - K23:+32.0564 - V1:+32.0564 - Y11:+79.96633 - Y17:+79.96633	11 17	8 10 11 16 17 20	1	a1.a1.a1	0.00015	3	2842.31	2842.3	0.0084	2.95535
a1	a1.a1	pepa1a1b14	02_T1_1b_HCDOT	17523	37.26	VDMTVDKYGSYGSYGSYGEYGKK	K7:+32.0564 - K22:+32.0564 - K23:+32.0564 - V1:+32.0564 - Y8:+79.96633 - Y20:+79.96633	8 20	8 10 11 16 17 20	1	a1.a1.a1	6.2e-07	3	2842.31	2842.3	0.011	3.8701
a1	a1.a1	pepa1a1b14	40_T4_1a_HCDOT	14948	37.11	VDMTVDKYGSYGSYGSYGEYGKK	K7:+32.0564 - K22:+32.0564 - K23:+32.0564 - V1:+32.0564 - S10:+79.96633 - Y20:+79.96633	10 20	8 10 11 16 17 20	1	a1.a1.a1	6.2e-08	3	2842.31	2842.3	0.0072	2.53316
a1	a1.a1	pepa1a1b14	41_T4_1b_HCDOT	15391	37.55	VDMTVDKYGSYGSYGSYGEYGKK	K7:+32.0564 - K22:+32.0564 - K23:+32.0564 - V1:+32.0564 - S16:+79.96633 - Y20:+79.96633	16 20	8 10 11 16 17 20	1	a1.a1.a1	0.00088	3	2842.3	2842.3	-0.0018	-0.633289
a1	a1.a1	pepa1a1b14	28_T3_1b_HCDOT	15121	37.25	VDMTVDKYGSYGSYGSYGEYGKK	K7:+32.0564 - K22:+32.0564 - K23:+32.0564 - V1:+32.0564 - S16:+79.96633 - Y20:+79.96633	16 20	8 10 11 16 17 20	1	a1.a1.a1	5.5e-05	3	2842.3	2842.3	-0.0009	-0.316645
a1	a1.a1	pepa1a1b10	15_T2_1b_HCDOT	13690	32.63	VDMTVDKYGSYGSYGSYGEYGKK	K7:+28.0313 - K22:+28.0313 - K23:+28.0313 - V1:+28.0313 - M3:+15.99491 - Y20:+79.96633	20	20	1	a1.a1.a1	1.1e-05	3	2762.23	2762.23	-0.0027	-0.977471
a1	a1.a1	pepa1a1b22	15_T2_1b_HCDOT	17241	38.18	YGSYGSYGSYGEYGK	K15:+32.0564 - Y1:+32.0564 - Y4:+79.96633 - Y13:+79.96633	4 13	4 6 7 10 13	1	a1.a1.a1	0.00013	2	1861.72	1861.72	0.0017	0.913133
a1	a1.a1	pepa1a1b22	40_T4_1a_HCDOT	15284	37.65	YGSYGSYGSYGEYGK	K15:+32.0564 - Y1:+32.0564 - S6:+79.96633 - Y10:+79.96633	6 10	4 6 7 10 13	1	a1.a1.a1	0.00016	2	1861.73	1861.72	0.0047	2.52455
a1	a1.a1	pepa1a1b22	27_T3_1a_HCDOT	15463	37.73	YGSYGSYGSYGEYGK	K15:+32.0564 - Y1:+32.0564 - S6:+79.96633 - Y13:+79.96633	6 13	4 6 7 10 13	1	a1.a1.a1	2.9e-07	2	1861.73	1861.72	0.0041	2.20226
a1	a1.a1	pepa1a1b22	28_T3_1b_HCDOT	15341	37.6	YGSYGSYGSYGEYGK	K15:+32.0564 - Y1:+32.0564 - Y7:+79.96633 - Y13:+79.96633	7 13	4 6 7 10 13	1	a1.a1.a1	4.8e-06	2	1861.72	1861.72	0.001	0.537137
a1	a1.a1	pepa1a1b22	41_T4_1b_HCDOT	15515	37.75	YGSYGSYGSYGEYGK	K15:+32.0564 - Y1:+32.0564 - Y7:+79.96633 - Y13:+79.96633	7 13	4 6 7 10 13	1	a1.a1.a1	7.3e-08	2	1861.73	1861.72	0.0067	3.59882
a1	a1.a1	pepa1a1b22	15_T2_1b_HCDOT	16773	37.46	YGSYGSYGSYGEYGK	K15:+32.0564 - Y1:+32.0564 - Y7:+79.96633 - Y10:+79.96633	7 10	4 6 7 10 13	1	a1.a1.a1	6.8e-12	2	1861.72	1861.72	0.0026	1.39656
a1	a1.a1	pepa1a1a7	27_T3_1a_HCDOT	17689	41.23	VDMTVDKYGSYGSYGSYGEYGK	K7:+36.0756 - K22:+36.0756 - V1:+36.0756 - S16:+79.96633 - Y8:+79.96633	8 16	4 8 10 11 13 14 16 17	1	a1.a1.a1	0.00019	3	2694.21	2694.21	0.001	0.371166
a1	a1.a1	pepa1a1a7	15_T2_1b_HCDOT	19161	41.18	VDMTVDKYGSYGSYGSYGEYGK	K7:+36.0756 - K22:+36.0756 - V1:+36.0756 - T4:+79.96633 - Y14:+79.96633	4 14	4 8 10 11 13 14 16 17	1	a1.a1.a1	0.00071	3	2694.21	2694.21	0.0003	0.11135
a1	a1.a1	pepa1a1a7	28_T3_1b_HCDOT	17625	41.23	VDMTVDKYGSYGSYGSYGEYGK	K7:+36.0756 - K22:+36.0756 - V1:+36.0756 - S10:+79.96633 - Y14:+79.96633	10 14	4 8 10 11 13 14 16 17	1	a1.a1.a1	6.2e-11	3	2694.21	2694.21	0.0043	1.59602
a1	a1.a1	pepa1a1b30	28_T3_1b_HCDOT	9534	28.05	YGSYGSYGSYGEYGKKSDQK	K15:+36.0756 - K16:+36.0756 - K20:+36.0756 - Y1:+36.0756 - S9:+79.96633 - Y13:+79.96633	9 13	9 10 13	1	a1.a1.a1	0.00019	3	2528.22	2528.22	0.0056	2.215
a1	a1.a1	pepa1a1a8	28_T3_1b_HCDOT	14710	36.6	VDMTVDKYGSYGSYGSYGEYGK	K7:+32.0564 - K22:+32.0564 - V1:+32.0564 - M3:+15.99491 - Y8:+79.96633 - Y20:+79.96633	8 20	4 8 10 11 13 20	1	a1.a1.a1	9.2e-05	3	2698.15	2698.15	0.0016	0.593
a2	a2.a1	pepa2a1a3	01_T1_1a_HCDOT	13540	33.11	NLNETQTFK	K9:+36.0756 - N1:+36.0756 - T5:+79.96633	5	5	1	a2.a1.a1	0.00071	2	1246.67	1246.67	0.0013	1.04278
a2	a2.a1	pepa2a1a3	08_T1_4b_HCDOT	9673	32.41	NLNETQTFK	K9:+36.0756 - N1:+36.0756 - T5:+79.96633	5	5	1	a2.a1.a1	0.00098	2	1246.67	1246.67	0.0023	1.84492
a2	a2.a1	pepa2a1a3	27_T3_1a_HCDOT	13262	34.28	NLNETQTFK	K9:+36.0756 - N1:+36.0756 - T5:+79.96633	5	5	1	a2.a1.a1	0.00011	2	1246.67	1246.67	0.0001	0.080214
a2	a2.a1	pepa2a1a3	30_T3_2b_HCDOT	9507	32.6	NLNETQTFK	K9:+36.0756 - N1:+36.0756 - T5:+79.96633	5	5	1	a2.a1.a1	0.00021	2	1246.67	1246.67	0.0013	1.04278
a2	a2.a1	pepa2a1a3	28_T3_1b_HCDOT	13442	34.55	NLNETQTFK	K9:+36.0756 - N1:+36.0756 - T5:+79.96633	5	5	1	a2.a1.a1	0.00025	2	1246.67	1246.67	0.0008	0.641712
a2	a2.a1	pepa2a1a3	27_T3_1a_HCDOT	28107	57.15	NLNETQTFK	K9:+36.0756 - N1:+36.0756 - T5:+79.96633	5	5	1	a2.a1.a1	0.00063	2	1246.67	1246.67	0.0011	0.882354
a2	a2.a1	pepa2a1a3	02_T1_1b_HCDOT	30715	57.06	NLNETQTFK	K9:+36.0756 - N1:+36.0756 - T5:+79.96633	5	5	1	a2.a1.a1	0.0007	2	1246.66	1246.67	-0.0009	-0.721926
a2	a2.a1	pepa2a1a3	27_T3_1a_HCDOT	12344	32.86	NLNETQTFK	K9:+36.0756 - N1:+36.0756 - T5:+79.96633	5	5	1	a2.a1.a1	0.00061	2	1246.67	1246.67	0.0013	1.04278
a2	a2.a1	pepa2a1a3	01_T1_1a_HCDOT	15157	35.48	NLNETQTFK	K9:+36.0756 - N1:+36.0756 - T5:+79.96633	5	5	1	a2.a1.a1	0.00075	2	1246.67	1246.67	0.0034	2.72727
a2	a2.a1	pepa2a1a6	27_T3_1a_HCDOT	21934	47.78	NLNETQTFKLNISE	K9:+36.0756 - N1:+36.0756 - T5:+79.96633	5	5	1	a2.a1.a1	8.5e-07	2	1802.95	1802.95	0.0018	0.998363
a2	a2.a1	pepa2a1a6	27_T3_1a_HCDOT	22404	48.5	NLNETQTFKLNISE	K9:+36.0756 - N1:+36.0756 - T5:+79.96633	5	5	1	a2.a1.a1	5.8e-05	2	1802.95	1802.95	0.0026	1.44208
a2	a2.a1	pepa2a1a6	01_T1_1a_HCDOT	23571	47.93	NLNETQTFKLNISE	K9:+36.0756 - N1:+36.0756 - T5:+79.96633	5	5	1	a2.a1.a1	0.00076	2	1802.95	1802.95	0.0031	1.7194
a2	a2.a1	pepa2a1a6	28_T3_1b_HCDOT	22860	49.41	NLNETQTFKLNISE	K9:+36.0756 - N1:+36.0756 - T5:+79.96633	5	5	1	a2.a1.a1	5.4e-05	2	1802.95	1802.95	-0.0006	-0.332788
a2	a2.a1	pepa2a1a6	01_T1_1a_HCDOT	24028	48.63	NLNETQTFKLNISE	K9:+36.0756 - N1:+36.0756 - T5:+79.96633	5	5	1	a2.a1.a1	0.00081	2	1802.96	1802.95	0.0038	2.10766
a2	a2.a1	pepa2a1a6	28_T3_1b_HCDOT	22269	48.5	NLNETQTFKLNISE	K9:+36.0756 - N1:+36.0756 - T5:+79.96633	5	5	1	a2.a1.a1	2.4e-05	2	1802.95	1802.95	0.0032	1.77487
a2	a2.a1	pepa2a1a6	02_T1_1b_HCDOT	24780	48.15	NLNETQTFKLNISE	K9:+36.0756 - N1:+36.0756 - T5:+79.96633	5	5	1	a2.a1.a1	0.00031	2	1802.95	1802.95	0.0029	1.60847
a2	a2.a1	pepa2a1a6	28_T3_1b_HCDOT	21825	47.81	NLNETQTFKLNISE	K9:+36.0756 - N1:+36.0756 - T5:+79.96633	5	5	1	a2.a1.a1	0.0002	2	1802.95	1802.95	0.0025	1.38662
a2	a2.a1	pepa2a1a6	28_T3_1b_HCDOT	23316	50.13	NLNETQTFKLNISE	K9:+36.0756 - N1:+36.0756 - T5:+79.96633	5	5	1	a2.a1.a1	0.00019	2	1802.95	1802.95	0.0026	1.44208
a2	a2.a1	pepa2a1a4	27_T3_1a_HCDOT	21983	47.86	NLNETQTFKLNISE	K9:+28.0313 - N1:+28.0313 - T5:+79.96633	5	5	1	a2.a1.a1	3.9e-07	2	1786.87	1786.86	0.0026	1.45506
a2	a2.a1	pepa2a1a4	01_T1_1a_HCDOT	23596	47.98	NLNETQTFKLNISE	K9:+28.0313 - N1:+28.0313 - T5:+79.96633	5	5	1	a2.a1.a1	2.6e-06	2	1786.87	1786.86	0.0048	2.68627
a2	a2.a1	pepa2a1a4	27_T3_1a_HCDOT	23195	49.7	NLNETQTFKLNISE	K9:+28.0313 - N1:+28.0313 - T5:+79.96633	5	5	1	a2.a1.a1	1.1e-05	2	1786.87	1786.86	0.0038	2.12663
a2	a2.a1	pepa2a1a4	02_T1_1b_HCDOT	24841	48.25	NLNETQTFKLNISE	K9:+28.0313 - N1:+28.0313 - T5:+79.96633	5	5	1	a2.a1.a1	6e-06	2	1786.87	1786.86	0.0044	2.46242
a2	a2.a1	pepa2a1a4	15_T2_1b_HCDOT	23975	48.58	NLNETQTFKLNISE	K9:+28.0313 - N1:+28.0313 - T5:+79.96633	5	5	1	a2.a1.a1	1.9e-05	2	1786.86	1786.86	0.0014	0.783496
a2	a2.a1	pepa2a1a4	14_T2_1a_HCDOT	22974	47.68	NLNETQTFKLNISE	K9:+28.0313 - N1:+28.0313 - T5:+79.96633	5	5	1	a2.a1.a1	3e-05	2	1786.86	1786.86	0.0012	0.671568
a2	a2.a1	pepa2a1a4	28_T3_1b_HCDOT	21867	47.88	NLNETQTFKLNISE	K9:+28.0313 - N1:+28.0313 - T5:+79.96633	5	5	1	a2.a1.a1	3.9e-05	2	1786.87	1786.86	0.0039	2.1826
a2	a2.a1	pepa2a1a4	02_T1_1b_HCDOT	25307	48.95	NLNETQTFKLNISE	K9:+28.0313 - N1:+28.0313 - T5:+79.96633	5	5	1	a2.a1.a1	0.00059	2	1786.87	1786.86	0.0025	1.3991
a2	a2.a1	pepa2a1a4	40_T4_1a_HCDOT	21915	47.96	NLNETQTFKLNISE	K9:+28.0313 - N1:+28.0313 - T5:+79.96633	5	5	1	a2.a1.a1	4.9e-06	2	1786.87	1786.86	0.0036	2.0147
a2	a2.a1	pepa2a1a4	28_T3_1b_HCDOT	22759	49.26	NLNETQTFKLNISE	K9:+28.0313 - N1:+28.0313 - T5:+79.96633	5	5	1	a2.a1.a1	4.8e-06	2	1786.86	1786.86	0.0006	0.335784
a2	a2.a1	pepa2a1a4	27_T3_1a_HCDOT	22432	48.53	NLNETQTFKLNISE	K9:+28.0313 - N1:+28.0313 - T5:+79.96633	5	5	1	a2.a1.a1	9.3e-05	2	1786.87	1786.86	0.0026	1.45506
a2	a2.a1	pepa2a1a4	28_T3_1b_HCDOT	22306	48.56	NLNETQTFKLNISE	K9:+28.0313 - N1:+28.0313 - T5:+79.96633	5	5	1	a2.a1.a1	8.5e-06	2	1786.87	1786.86	0.0025	1.3991
a2	a2.a1	pepa2a1a4	40_T4_1a_HCDOT	22377	48.66	NLNETQTFKLNISE	K9:+28.0313 - N1:+28.0313 - T5:+79.96633	5	5	1	a2.a1.a1	4.3e-06	2	1786.87	1786.86	0.0039	2.1826
a2	a2.a1	pepa2a1a4	43_T4_2b_HCDOT	18006	48.23	NLNETQTFKLNISE	K9:+28.0313 - N1:+28.0313 - T5:+79.96633	5	5	1	a2.a1.a1	0.00036	2	1786.87	1786.86	0.0065	3.63766
a2	a2.a1	pepa2a1a4	15_T2_1b_HCDOT	23497	47.85	NLNETQTFKLNISE	K9:+28.0313 - N1:+28.0313 - T5:+79.96633	5	5	1	a2.a1.a1	3.5e-06	2	1786.87	1786.86	0.0031	1.73488
a2	a2.a1	pepa2a1a4	04_T1_2b_HCDOT	20551	48.26	NLNETQTFKLNISE	K9:+28.0313 - N1:+28.0313 - T5:+79.96633	5	5	1	a2.a1.a1	0.00018	2	1786.87	1786.86	0.0047	2.63031
a2	a2.a1	pepa2a1a4	28_T3_1b_HCDOT	23289	50.08	NLNETQTFKLNISE	K9:+28.0313 - N1:+28.0313 - T5:+79.96633	5	5	1	a2.a1.a1	0.00043	2	1786.87	1786.86	0.0026	1.45506
a2	a2.a1	pepa2a1a4	41_T4_1b_HCDOT	22640	48.83	NLNETQTFKLNISE	K9:+28.0313 - N1:+28.0313 - T5:+79.96633	5	5	1	a2.a1.a1	0.0003	2	1786.87	1786.86	0.0033	1.84681
a2	a2.a1	pepa2a1a4	42_T4_2a_HCDOT	18219	48.21	NLNETQTFKLNISE	K9:+28.0313 - N1:+28.0313 - T5:+79.96633	5	5	1	a2.a1.a1	0.00019	2	1786.87	1786.86	0.0028	1.56699
a2	a2.a1	pepa2a1a1	27_T3_1a_HCDOT	12115	32.5	NLNETQTFK	K9:+28.0313 - N1:+28.0313 - T5:+79.96633	5	5	1	a2.a1.a1	0.00055	2	1230.58	1230.58	0.0051	4.1444
a2	a2.a1	pepa2a1a1	41_T4_1b_HCDOT	12295	32.56	NLNETQTFK	K9:+28.0313 - N1:+28.0313 - T5:+79.96633	5	5	1	a2.a1.a1	0.00034	2	1230.58	1230.58	0.0053	4.30692
a2	a2.a1	pepa2a1a1	41_T4_1b_HCDOT	12703	33.25	NLNETQTFK	K9:+28.0313 - N1:+28.0313 - T5:+79.96633	5	5	1	a2.a1.a1	0.0002	2	1230.58	1230.58	0.0024	1.9503
a2	a2.a1	pepa2a1a1	17_T2_2b_HCDOT	11219	32.73	NLNETQTFK	K9:+28.0313 - N1:+28.0313 - T5:+79.96633	5	5	1	a2.a1.a1	0.00011	2	1230.58	1230.58	0.0023	1.86904
a2	a2.a1	pepa2a1a1	31_T3_3a_HCDOT	9529	32.86	NLNETQTFK	K9:+28.0313 - N1:+28.0313 - T5:+79.96633	5	5	1	a2.a1.a1	0.00082	2	1230.58	1230.58	0.0026	2.11283
a2	a2.a1	pepa2a1a1	02_T1_1b_HCDOT	14388	32.58	NLNETQTFK	K9:+28.0313 - N1:+28.0313 - T5:+79.96633	5	5	1	a2.a1.a1	0.00073	2	1230.58	1230.58	0.0054	4.38819
a2	a2.a1	pepa2a1a1	40_T4_1a_HCDOT	28019	57.18	NLNETQTFK	K9:+28.0313 - N1:+28.0313 - T5:+79.96633	5	5	1	a2.a1.a1	2.3e-05	2	1230.58	1230.58	0.0001	0.0812627
a2	a2.a1	pepa2a1a1	43_T4_2b_HCDOT	9958	33.48	NLNETQTFK	K9:+28.0313 - N1:+28.0313 - T5:+79.96633	5	5	1	a2.a1.a1	0.00034	2	1230.58	1230.58	0.0018	1.46273
a2	a2.a1	pepa2a1a1	02_T1_1b_HCDOT	30854	57.28	NLNETQTFK	K9:+28.0313 - N1:+28.0313 - T5:+79.96633	5	5	1	a2.a1.a1	6.8e-05	2	1230.58	1230.58	0.0007	0.568839
a2	a2.a1	pepa2a1a1	27_T3_1a_HCDOT	13027	33.93	NLNETQTFK	K9:+28.0313 - N1:+28.0313 - T5:+79.96633	5	5	1	a2.a1.a1	0.00066	2	1230.58	1230.58	0.0016	1.3002
a2	a2.a1	pepa2a1a1	14_T2_1a_HCDOT	13763	33.75	NLNETQTFK	K9:+28.0313 - N1:+28.0313 - T5:+79.96633	5	5	1	a2.a1.a1	0.00024	2	1230.58	1230.58	0.0003	0.243788
a2	a2.a1	pepa2a1a1	27_T3_1a_HCDOT	12574	33.21	NLNETQTFK	K9:+28.0313 - N1:+28.0313 - T5:+79.96633	5	5	1	a2.a1.a1	0.00024	2	1230.58	1230.58	0.0013	1.05641
a2	a2.a1	pepa2a1a1	28_T3_1b_HCDOT	12184	32.5	NLNETQTFK	K9:+28.0313 - N1:+28.0313 - T5:+79.96633	5	5	1	a2.a1.a1	0.00073	2	1230.58	1230.58	0.004	3.25051
a2	a2.a1	pepa2a1a1	15_T2_1b_HCDOT	29671	57.15	NLNETQTFK	K9:+28.0313 - N1:+28.0313 - T5:+79.96633	5	5	1	a2.a1.a1	0.00027	2	1230.58	1230.58	0.0029	2.35662
a2	a2.a1	pepa2a1a1	41_T4_1b_HCDOT	28104	57.15	NLNETQTFK	K9:+28.0313 - N1:+28.0313 - T5:+79.96633	5	5	1	a2.a1.a1	7.5e-05	2	1230.58	1230.58	0.0002	0.162525
a2	a2.a1	pepa2a1a2	17_T2_2b_HCDOT	11202	32.7	NLNETQTFK	K9:+32.0564 - N1:+32.0564 - T5:+79.96633	5	5	1	a2.a1.a1	0.00018	2	1238.63	1238.63	0.0016	1.29175
a2	a2.a1	pepa2a1a2	41_T4_1b_HCDOT	12662	33.18	NLNETQTFK	K9:+32.0564 - N1:+32.0564 - T5:+79.96633	5	5	1	a2.a1.a1	1.1e-05	2	1238.63	1238.63	0.002	1.61469
a2	a2.a1	pepa2a1a2	43_T4_2b_HCDOT	23141	57.15	NLNETQTFK	K9:+32.0564 - N1:+32.0564 - T5:+79.96633	5	5	1	a2.a1.a1	0.00034	2	1238.63	1238.63	0.0044	3.55232
a2	a2.a1	pepa2a1a2	41_T4_1b_HCDOT	12253	32.48	NLNETQTFK	K9:+32.0564 - N1:+32.0564 - T5:+79.96633	5	5	1	a2.a1.a1	1.5e-05	2	1238.63	1238.63	0.0017	1.37249
a2	a2.a1	pepa2a1a2	40_T4_1a_HCDOT	12765	33.66	NLNETQTFK	K9:+32.0564 - N1:+32.0564 - T5:+79.96633	5	5	1	a2.a1.a1	0.00033	2	1238.63	1238.63	0.0021	1.69543
a2	a2.a1	pepa2a1a2	14_T2_1a_HCDOT	12698	32.15	NLNETQTFK	K9:+32.0564 - N1:+32.0564 - T5:+79.96633	5	5	1	a2.a1.a1	2.3e-06	2	1238.63	1238.63	0.0009	0.726611
a2	a2.a1	pepa2a1a2	15_T2_1b_HCDOT	13924	33	NLNETQTFK	K9:+32.0564 - N1:+32.0564 - T5:+79.96633	5	5	1	a2.a1.a1	1.4e-05	2	1238.63	1238.63	0.0008	0.645876
a2	a2.a1	pepa2a1a2	16_T2_2a_HCDOT	11474	32.6	NLNETQTFK	K9:+32.0564 - N1:+32.0564 - T5:+79.96633	5	5	1	a2.a1.a1	0.00014	2	1238.63	1238.63	0.0011	0.88808
a2	a2.a1	pepa2a1a2	15_T2_1b_HCDOT	13485	32.3	NLNETQTFK	K9:+32.0564 - N1:+32.0564 - T5:+79.96633	5	5	1	a2.a1.a1	1.5e-05	2	1238.63	1238.63	0.0011	0.88808
a2	a2.a1	pepa2a1a2	44_T4_3a_HCDOT	9684	32.86	NLNETQTFK	K9:+32.0564 - N1:+32.0564 - T5:+79.96633	5	5	1	a2.a1.a1	0.00062	2	1238.63	1238.63	0.0027	2.17983
a2	a2.a1	pepa2a1a2	14_T2_1a_HCDOT	17510	39.4	NLNETQTFK	K9:+32.0564 - N1:+32.0564 - T5:+79.96633	5	5	1	a2.a1.a1	0.00031	2	1238.63	1238.63	0.0039	3.14865
a2	a2.a1	pepa2a1a2	40_T4_1a_HCDOT	16584	39.68	NLNETQTFK	K9:+32.0564 - N1:+32.0564 - T5:+79.96633	5	5	1	a2.a1.a1	0.00014	2	1238.63	1238.63	0.0045	3.63305
a2	a2.a1	pepa2a1a2	42_T4_2a_HCDOT	10065	33.41	NLNETQTFK	K9:+32.0564 - N1:+32.0564 - T5:+79.96633	5	5	1	a2.a1.a1	0.0008	2	1238.63	1238.63	0.0021	1.69543
a2	a2.a1	pepa2a1a2	40_T4_1a_HCDOT	12318	32.96	NLNETQTFK	K9:+32.0564 - N1:+32.0564 - T5:+79.96633	5	5	1	a2.a1.a1	2.2e-05	2	1238.63	1238.63	0.0016	1.29175
a2	a2.a1	pepa2a1a2	40_T4_1a_HCDOT	13878	35.41	NLNETQTFK	K9:+32.0564 - N1:+32.0564 - T5:+79.96633	5	5	1	a2.a1.a1	0.00051	2	1238.63	1238.63	0.0025	2.01836
a2	a2.a1	pepa2a1a2	40_T4_1a_HCDOT	11871	32.25	NLNETQTFK	K9:+32.0564 - N1:+32.0564 - T5:+79.96633	5	5	1	a2.a1.a1	3.8e-05	2	1238.63	1238.63	0.0014	1.13028
a2	a2.a1	pepa2a1a2	14_T2_1a_HCDOT	13171	32.86	NLNETQTFK	K9:+32.0564 - N1:+32.0564 - T5:+79.96633	5	5	1	a2.a1.a1	7.9e-07	2	1238.63	1238.63	0.0008	0.645876
a2	a2.a1	pepa2a1a2	41_T4_1b_HCDOT	13142	33.95	NLNETQTFK	K9:+32.0564 - N1:+32.0564 - T5:+79.96633	5	5	1	a2.a1.a1	0.0004	2	1238.63	1238.63	0.0019	1.53396
a2	a2.a1	pepa2a1a5	43_T4_2b_HCDOT	17970	48.16	NLNETQTFKLNISE	K9:+32.0564 - N1:+32.0564 - T5:+79.96633	5	5	1	a2.a1.a1	7.6e-06	2	1794.92	1794.91	0.0043	2.39566
a2	a2.a1	pepa2a1a5	41_T4_1b_HCDOT	24713	52	NLNETQTFKLNISE	K9:+32.0564 - N1:+32.0564 - T5:+79.96633	5	5	1	a2.a1.a1	0.00071	2	1794.92	1794.91	0.0054	3.0085
a2	a2.a1	pepa2a1a5	14_T2_1a_HCDOT	22926	47.61	NLNETQTFKLNISE	K9:+32.0564 - N1:+32.0564 - T5:+79.96633	5	5	1	a2.a1.a1	5.2e-07	2	1794.91	1794.91	-0.0009	-0.501417
a2	a2.a1	pepa2a1a5	40_T4_1a_HCDOT	22354	48.63	NLNETQTFKLNISE	K9:+32.0564 - N1:+32.0564 - T5:+79.96633	5	5	1	a2.a1.a1	0.00054	2	1794.92	1794.91	0.0026	1.44854
a2	a2.a1	pepa2a1a5	41_T4_1b_HCDOT	22150	48.1	NLNETQTFKLNISE	K9:+32.0564 - N1:+32.0564 - T5:+79.96633	5	5	1	a2.a1.a1	1.1e-06	2	1794.92	1794.91	0.0035	1.94996
a2	a2.a1	pepa2a1a5	40_T4_1a_HCDOT	23681	50.65	NLNETQTFKLNISE	K9:+32.0564 - N1:+32.0564 - T5:+79.96633	5	5	1	a2.a1.a1	4.9e-05	2	1794.92	1794.91	0.0029	1.61568
a2	a2.a1	pepa2a1a5	42_T4_2a_HCDOT	18595	48.85	NLNETQTFKLNISE	K9:+32.0564 - N1:+32.0564 - T5:+79.96633	5	5	1	a2.a1.a1	1.4e-05	2	1794.92	1794.91	0.0032	1.78282
a2	a2.a1	pepa2a1a5	14_T2_1a_HCDOT	23414	48.33	NLNETQTFKLNISE	K9:+32.0564 - N1:+32.0564 - T5:+79.96633	5	5	1	a2.a1.a1	4.5e-05	2	1794.91	1794.91	0.0006	0.334278
a2	a2.a1	pepa2a1a5	40_T4_1a_HCDOT	21896	47.93	NLNETQTFKLNISE	K9:+32.0564 - N1:+32.0564 - T5:+79.96633	5	5	1	a2.a1.a1	3.3e-07	2	1794.91	1794.91	0.0019	1.05855
a2	a2.a1	pepa2a1a5	42_T4_2a_HCDOT	18196	48.16	NLNETQTFKLNISE	K9:+32.0564 - N1:+32.0564 - T5:+79.96633	5	5	1	a2.a1.a1	2.2e-05	2	1794.92	1794.91	0.0023	1.2814
a2	a2.a1	pepa2a1a5	17_T2_2b_HCDOT	19623	47.81	NLNETQTFKLNISE	K9:+32.0564 - N1:+32.0564 - T5:+79.96633	5	5	1	a2.a1.a1	6e-06	2	1794.91	1794.91	-0.0003	-0.167139
a2	a2.a1	pepa2a1a5	15_T2_1b_HCDOT	23473	47.81	NLNETQTFKLNISE	K9:+32.0564 - N1:+32.0564 - T5:+79.96633	5	5	1	a2.a1.a1	3.8e-07	2	1794.91	1794.91	0.0012	0.668556
a2	a2.a1	pepa2a1a5	41_T4_1b_HCDOT	22607	48.78	NLNETQTFKLNISE	K9:+32.0564 - N1:+32.0564 - T5:+79.96633	5	5	1	a2.a1.a1	0.00022	2	1794.92	1794.91	0.0034	1.89424
a2	a2.a1	pepa2a1a5	15_T2_1b_HCDOT	23929	48.5	NLNETQTFKLNISE	K9:+32.0564 - N1:+32.0564 - T5:+79.96633	5	5	1	a2.a1.a1	2.3e-05	2	1794.92	1794.91	0.0041	2.28423
a2	a2.a2	pepa2a2b10	02_T1_1b_HCDOT	17447	37.15	VLDEHVPDSNDAASFDATR	V1:+36.0756 - T18:+79.96633	18	9 14 18	1	a2.a2.a1	8.9e-12	2	2174.98	2174.98	0.0053	2.43681
a2	a2.a2	pepa2a2b10	04_T1_2b_HCDOT	14167	37.15	VLDEHVPDSNDAASFDATR	V1:+36.0756 - S14:+79.96633	14	9 14 18	1	a2.a2.a1	1.6e-05	2	2174.99	2174.98	0.0092	4.22993
a2	a2.a2	pepa2a2b10	04_T1_2b_HCDOT	14165	37.13	VLDEHVPDSNDAASFDATR	V1:+36.0756 - T18:+79.96633	18	9 14 18	1	a2.a2.a1	2.6e-07	3	2174.99	2174.98	0.0074	3.40233
a2	a2.a2	pepa2a2b10	30_T3_2b_HCDOT	11921	37.15	VLDEHVPDSNDAASFDATR	V1:+36.0756 - T18:+79.96633	18	9 14 18	1	a2.a2.a1	2.5e-05	3	2174.98	2174.98	0.005	2.29887
a2	a2.a2	pepa2a2b10	27_T3_1a_HCDOT	14512	36.23	VLDEHVPDSNDAASFDATR	V1:+36.0756 - S14:+79.96633	14	9 14 18	1	a2.a2.a1	2.1e-07	3	2174.98	2174.98	0.0037	1.70117
a2	a2.a2	pepa2a2b10	28_T3_1b_HCDOT	15018	37.1	VLDEHVPDSNDAASFDATR	V1:+36.0756 - T18:+79.96633	18	9 14 18	1	a2.a2.a1	1.7e-10	2	2174.98	2174.98	0.0033	1.51726
a2	a2.a2	pepa2a2b10	02_T1_1b_HCDOT	17408	37.1	VLDEHVPDSNDAASFDATR	V1:+36.0756 - T18:+79.96633	18	9 14 18	1	a2.a2.a1	8.9e-07	3	2174.98	2174.98	0.005	2.29887
a2	a2.a2	pepa2a2b10	27_T3_1a_HCDOT	14959	36.95	VLDEHVPDSNDAASFDATR	V1:+36.0756 - T18:+79.96633	18	9 14 18	1	a2.a2.a1	2.5e-14	2	2174.98	2174.98	0.0033	1.51726
a2	a2.a2	pepa2a2b10	03_T1_2a_HCDOT	14750	37.15	VLDEHVPDSNDAASFDATR	V1:+36.0756 - T18:+79.96633	18	9 14 18	1	a2.a2.a1	1.5e-08	3	2174.99	2174.98	0.0068	3.12647
a2	a2.a2	pepa2a2b10	27_T3_1a_HCDOT	14958	36.95	VLDEHVPDSNDAASFDATR	V1:+36.0756 - T18:+79.96633	18	9 14 18	1	a2.a2.a1	2e-07	3	2174.98	2174.98	0.0023	1.05748
a2	a2.a2	pepa2a2b10	29_T3_2a_HCDOT	12060	37.11	VLDEHVPDSNDAASFDATR	V1:+36.0756 - T18:+79.96633	18	9 14 18	1	a2.a2.a1	9.7e-07	3	2174.98	2174.98	0.0036	1.65519
a2	a2.a2	pepa2a2b10	28_T3_1b_HCDOT	14928	36.95	VLDEHVPDSNDAASFDATR	V1:+36.0756 - T18:+79.96633	18	9 14 18	1	a2.a2.a1	4.4e-08	3	2174.98	2174.98	0.003	1.37932
a2	a2.a2	pepa2a2b10	03_T1_2a_HCDOT	14753	37.15	VLDEHVPDSNDAASFDATR	V1:+36.0756 - S14:+79.96633	14	9 14 18	1	a2.a2.a1	2e-06	2	2174.98	2174.98	0.0048	2.20692
a2	a2.a2	pepa2a2b10	01_T1_1a_HCDOT	15651	36.2	VLDEHVPDSNDAASFDATR	V1:+36.0756 - S14:+79.96633	14	9 14 18	1	a2.a2.a1	1.8e-09	2	2174.98	2174.98	0.0023	1.05748
a2	a2.a2	pepa2a2b10	01_T1_1a_HCDOT	15647	36.2	VLDEHVPDSNDAASFDATR	V1:+36.0756 - S14:+79.96633	14	9 14 18	1	a2.a2.a1	3.1e-09	3	2174.98	2174.98	0.0032	1.47128
a2	a2.a2	pepa2a2b10	02_T1_1b_HCDOT	16928	36.38	VLDEHVPDSNDAASFDATR	V1:+36.0756 - S14:+79.96633	14	9 14 18	1	a2.a2.a1	4.2e-08	3	2174.99	2174.98	0.011	5.05752
a2	a2.a2	pepa2a2b10	28_T3_1b_HCDOT	14497	36.25	VLDEHVPDSNDAASFDATR	V1:+36.0756 - S14:+79.96633	14	9 14 18	1	a2.a2.a1	8.4e-07	3	2174.98	2174.98	0.0054	2.48278
a2	a2.a2	pepa2a2b10	02_T1_1b_HCDOT	16967	36.43	VLDEHVPDSNDAASFDATR	V1:+36.0756 - S9:+79.96633	9	9 14 18	1	a2.a2.a1	0.00076	2	2174.98	2174.98	0.0033	1.51726
a2	a2.a2	pepa2a2a8	41_T4_1b_HCDOT	15201	37.25	VLDEHVPDSNDAASFDATR	V1:+28.0313 - T18:+79.96633	18	9 14 18	1	a2.a2.a1	0.00041	2	2166.94	2166.93	0.0042	1.93822
a2	a2.a2	pepa2a2a8	27_T3_1a_HCDOT	15084	37.15	VLDEHVPDSNDAASFDATR	V1:+28.0313 - S14:+79.96633	14	9 14 18	1	a2.a2.a1	1.2e-05	3	2166.94	2166.93	0.0038	1.75363
a2	a2.a2	pepa2a2a8	04_T1_2b_HCDOT	14166	37.15	VLDEHVPDSNDAASFDATR	V1:+28.0313 - T18:+79.96633	18	9 14 18	1	a2.a2.a1	7.7e-07	3	2166.94	2166.93	0.0077	3.55341
a2	a2.a2	pepa2a2a8	27_T3_1a_HCDOT	14999	37.01	VLDEHVPDSNDAASFDATR	V1:+28.0313 - S9:+79.96633	9	9 14 18	1	a2.a2.a1	4.8e-06	2	2166.94	2166.93	0.0032	1.47674
a2	a2.a2	pepa2a2a8	01_T1_1a_HCDOT	16029	36.75	VLDEHVPDSNDAASFDATR	V1:+28.0313 - T18:+79.96633	18	9 14 18	1	a2.a2.a1	9.4e-11	2	2166.94	2166.93	0.0027	1.246
a2	a2.a2	pepa2a2a8	28_T3_1b_HCDOT	14929	36.95	VLDEHVPDSNDAASFDATR	V1:+28.0313 - S14:+79.96633	14	9 14 18	1	a2.a2.a1	1.3e-06	3	2166.94	2166.93	0.0059	2.72274
a2	a2.a2	pepa2a2a8	14_T2_1a_HCDOT	15347	36.13	VLDEHVPDSNDAASFDATR	V1:+28.0313 - S14:+79.96633	14	9 14 18	1	a2.a2.a1	6.2e-05	2	2166.93	2166.93	-0.0019	-0.876815
a2	a2.a2	pepa2a2a8	27_T3_1a_HCDOT	14553	36.3	VLDEHVPDSNDAASFDATR	V1:+28.0313 - S9:+79.96633	9	9 14 18	1	a2.a2.a1	0.00029	2	2166.94	2166.93	0.0029	1.3383
a2	a2.a2	pepa2a2a8	40_T4_1a_HCDOT	14871	37	VLDEHVPDSNDAASFDATR	V1:+28.0313 - T18:+79.96633	18	9 14 18	1	a2.a2.a1	4.3e-06	2	2166.94	2166.93	0.0051	2.35356
a2	a2.a2	pepa2a2a8	01_T1_1a_HCDOT	15706	36.28	VLDEHVPDSNDAASFDATR	V1:+28.0313 - S14:+79.96633	14	9 14 18	1	a2.a2.a1	4.6e-09	3	2166.94	2166.93	0.0059	2.72274
a2	a2.a2	pepa2a2a8	02_T1_1b_HCDOT	16966	36.43	VLDEHVPDSNDAASFDATR	V1:+28.0313 - S14:+79.96633	14	9 14 18	1	a2.a2.a1	2e-08	3	2166.94	2166.93	0.0037	1.70748
a2	a2.a2	pepa2a2a8	28_T3_1b_HCDOT	14976	37.01	VLDEHVPDSNDAASFDATR	V1:+28.0313 - T18:+79.96633	18	9 14 18	1	a2.a2.a1	4.6e-06	2	2166.94	2166.93	0.0037	1.70748
a2	a2.a2	pepa2a2a8	41_T4_1b_HCDOT	15312	37.43	VLDEHVPDSNDAASFDATR	V1:+28.0313 - T18:+79.96633	18	9 14 18	1	a2.a2.a1	6.5e-05	2	2166.94	2166.93	0.0078	3.59956
a2	a2.a2	pepa2a2a8	28_T3_1b_HCDOT	14540	36.31	VLDEHVPDSNDAASFDATR	V1:+28.0313 - S14:+79.96633	14	9 14 18	1	a2.a2.a1	0.00085	2	2166.94	2166.93	0.0027	1.246
a2	a2.a2	pepa2a2a8	02_T1_1b_HCDOT	17446	37.15	VLDEHVPDSNDAASFDATR	V1:+28.0313 - S14:+79.96633	14	9 14 18	1	a2.a2.a1	4.5e-06	3	2166.94	2166.93	0.0055	2.53815
a2	a2.a2	pepa2a2b11	02_T1_1b_HCDOT	23254	45.9	VLDEHVPDSNDAASFDATRQFTPDEMAELQR	V1:+28.0313 - S14:+79.96633	14	9 14 18	1	a2.a2.a1	7.5e-05	3	3612.61	3612.59	0.012	3.32171
a2	a2.a2	pepa2a2b11	14_T2_1a_HCDOT	21309	45.2	VLDEHVPDSNDAASFDATRQFTPDEMAELQR	V1:+28.0313 - T18:+79.96633	18	9 14 18	1	a2.a2.a1	1.7e-07	3	3612.6	3612.6	0.0049	1.35637
a2	a2.a2	pepa2a2b11	01_T1_1a_HCDOT	21905	45.48	VLDEHVPDSNDAASFDATRQFTPDEMAELQR	V1:+28.0313 - T18:+79.96633	18	9 14 18	1	a2.a2.a1	8e-10	3	3612.61	3612.59	0.011	3.0449
a2	a2.a2	pepa2a2b15	02_T1_1b_HCDOT	20720	42.1	VLDEHVPDSNDAASFDATRQFTPDEMAELQR	V1:+36.0756 - M26:+15.99491 - T18:+79.96633	18	9 14 18	1	a2.a2.a1	3.2e-05	3	3636.64	3636.63	0.0053	1.45739
a2	a2.a2	pepa2a2b13	03_T1_2a_HCDOT	19738	45.78	VLDEHVPDSNDAASFDATRQFTPDEMAELQR	V1:+36.0756 - T22:+79.96633	22	14 18 22	1	a2.a2.a1	8.1e-05	3	3620.65	3620.64	0.0085	2.34765
a2	a2.a2	pepa2a2b13	28_T3_1b_HCDOT	22233	48.45	VLDEHVPDSNDAASFDATRQFTPDEMAELQR	V1:+36.0756 - T18:+79.96633	18	14 18 22	1	a2.a2.a1	0.00021	3	3620.64	3620.64	0.0052	1.43621
a2	a2.a2	pepa2a2a9	14_T2_1a_HCDOT	15247	35.98	VLDEHVPDSNDAASFDATR	V1:+32.0564 - S14:+79.96633	14	14 18	1	a2.a2.a1	7.6e-06	3	2170.96	2170.96	0.0016	0.737001
a2	a2.a2	pepa2a2a9	15_T2_1b_HCDOT	16390	36.85	VLDEHVPDSNDAASFDATR	V1:+32.0564 - T18:+79.96633	18	14 18	1	a2.a2.a1	9.8e-11	2	2170.96	2170.96	0.0027	1.24369
a2	a2.a2	pepa2a2a9	15_T2_1b_HCDOT	16385	36.83	VLDEHVPDSNDAASFDATR	V1:+32.0564 - T18:+79.96633	18	14 18	1	a2.a2.a1	3.9e-08	3	2170.96	2170.96	0.0014	0.644876
a2	a2.a2	pepa2a2a9	14_T2_1a_HCDOT	15300	36.05	VLDEHVPDSNDAASFDATR	V1:+32.0564 - S14:+79.96633	14	14 18	1	a2.a2.a1	1.2e-08	2	2170.96	2170.96	0.001	0.460626
a2	a2.a2	pepa2a2a9	40_T4_1a_HCDOT	14366	36.2	VLDEHVPDSNDAASFDATR	V1:+32.0564 - S14:+79.96633	14	14 18	1	a2.a2.a1	7e-06	2	2170.96	2170.96	0.0018	0.829126
a2	a2.a2	pepa2a2a9	14_T2_1a_HCDOT	15780	36.78	VLDEHVPDSNDAASFDATR	V1:+32.0564 - T18:+79.96633	18	14 18	1	a2.a2.a1	9.9e-09	2	2170.96	2170.96	0.0032	1.474
a2	a2.a2	pepa2a2a9	14_T2_1a_HCDOT	15717	36.68	VLDEHVPDSNDAASFDATR	V1:+32.0564 - T18:+79.96633	18	14 18	1	a2.a2.a1	1.9e-06	3	2170.96	2170.96	0.0008	0.368501
a2	a2.a2	pepa2a2a9	41_T4_1b_HCDOT	15257	37.33	VLDEHVPDSNDAASFDATR	V1:+32.0564 - S14:+79.96633	14	14 18	1	a2.a2.a1	7.7e-05	3	2170.96	2170.96	0.0003	0.138188
a2	a2.a2	pepa2a2a9	41_T4_1b_HCDOT	14727	36.5	VLDEHVPDSNDAASFDATR	V1:+32.0564 - S14:+79.96633	14	14 18	1	a2.a2.a1	1e-08	2	2170.96	2170.96	0.0035	1.61219
a2	a2.a2	pepa2a2a9	41_T4_1b_HCDOT	15166	37.18	VLDEHVPDSNDAASFDATR	V1:+32.0564 - T18:+79.96633	18	14 18	1	a2.a2.a1	1.5e-09	2	2170.96	2170.96	0.0047	2.16494
a2	a2.a2	pepa2a2a9	41_T4_1b_HCDOT	14816	36.63	VLDEHVPDSNDAASFDATR	V1:+32.0564 - S14:+79.96633	14	14 18	1	a2.a2.a1	5.4e-09	3	2170.96	2170.96	0.004	1.8425
a2	a2.a2	pepa2a2a9	15_T2_1b_HCDOT	15924	36.11	VLDEHVPDSNDAASFDATR	V1:+32.0564 - S14:+79.96633	14	14 18	1	a2.a2.a1	2.4e-08	3	2170.96	2170.96	0.0007	0.322438
a2	a2.a2	pepa2a2b14	40_T4_1a_HCDOT	18200	42.26	VLDEHVPDSNDAASFDATRQFTPDEMAELQR	V1:+32.0564 - M26:+15.99491 - S9:+79.96633	9	9	1	a2.a2.a1	2.1e-07	3	3632.62	3632.62	0.0093	2.56014
a2	a2.a2	pepa2a2a7	43_T4_2b_HCDOT	15834	44.31	QFTPDEMAELQR	Q1:+32.0564 - T3:+79.96633	3	3	1	a2.a2.a1	0.00062	2	1576.71	1576.7	0.005	3.17118
a2	a2.a2	pepa2a2a7	41_T4_1b_HCDOT	19660	44.26	QFTPDEMAELQR	Q1:+32.0564 - T3:+79.96633	3	3	1	a2.a2.a1	0.00065	2	1576.71	1576.7	0.0042	2.66379
a2	a2.a2	pepa2a2b12	42_T4_2a_HCDOT	17301	46.61	VLDEHVPDSNDAASFDATRQFTPDEMAELQR	V1:+32.0564 - S9:+79.96633	9	9 14 18	1	a2.a2.a1	0.0001	3	3616.63	3616.62	0.0081	2.23966
a3	a3.a1	pepa3a1b18	27_T3_1a_HCDOT	13358	34.43	KTQNSYEESQELDFQDAK	K1:+36.0756 - K18:+36.0756 - K1:+36.0756 - S9:+79.96633	9	9	1	a3.a1.a1	1.1e-07	3	2348.17	2348.17	0.0004	0.170346
a3	a3.a1	pepa3a1b18	02_T1_1b_HCDOT	15769	34.65	KTQNSYEESQELDFQDAK	K1:+36.0756 - K18:+36.0756 - K1:+36.0756 - S9:+79.96633	9	9	1	a3.a1.a1	3.4e-09	3	2348.17	2348.17	0.0075	3.19398
a3	a3.a1	pepa3a1b18	28_T3_1b_HCDOT	13440	34.53	KTQNSYEESQELDFQDAK	K1:+36.0756 - K18:+36.0756 - K1:+36.0756 - S9:+79.96633	9	9	1	a3.a1.a1	1.7e-09	3	2348.17	2348.17	0.0018	0.766556
a3	a3.a1	pepa3a1b18	01_T1_1a_HCDOT	14497	34.51	KTQNSYEESQELDFQDAK	K1:+36.0756 - K18:+36.0756 - K1:+36.0756 - S9:+79.96633	9	9	1	a3.a1.a1	5.7e-06	2	2348.17	2348.17	0.0027	1.14983
a3	a3.a1	pepa3a1b18	02_T1_1b_HCDOT	15831	34.73	KTQNSYEESQELDFQDAK	K1:+36.0756 - K18:+36.0756 - K1:+36.0756 - S9:+79.96633	9	9	1	a3.a1.a1	0.0007	2	2348.17	2348.17	0.0073	3.10881
a3	a3.a1	pepa3a1b16	41_T4_1b_HCDOT	13776	34.95	KTQNSYEESQELDFQDAK	K1:+28.0313 - K18:+28.0313 - K1:+28.0313 - S9:+79.96633	9	9	1	a3.a1.a1	1.7e-06	3	2324.04	2324.03	0.0031	1.33389
a3	a3.a1	pepa3a1b16	01_T1_1a_HCDOT	14540	34.58	KTQNSYEESQELDFQDAK	K1:+28.0313 - K18:+28.0313 - K1:+28.0313 - S9:+79.96633	9	9	1	a3.a1.a1	1.6e-08	3	2324.04	2324.03	0.0045	1.93629
a3	a3.a1	pepa3a1b16	28_T3_1b_HCDOT	13527	34.68	KTQNSYEESQELDFQDAK	K1:+28.0313 - K18:+28.0313 - K1:+28.0313 - S9:+79.96633	9	9	1	a3.a1.a1	2.2e-06	3	2324.03	2324.03	0.0014	0.602401
a3	a3.a1	pepa3a1b16	15_T2_1b_HCDOT	14875	34.46	KTQNSYEESQELDFQDAK	K1:+28.0313 - K18:+28.0313 - K1:+28.0313 - S9:+79.96633	9	9	1	a3.a1.a1	2.6e-07	3	2324.03	2324.03	0.0007	0.3012
a3	a3.a1	pepa3a1b16	27_T3_1a_HCDOT	13399	34.5	KTQNSYEESQELDFQDAK	K1:+28.0313 - K18:+28.0313 - K1:+28.0313 - S9:+79.96633	9	9	1	a3.a1.a1	2.8e-07	3	2324.04	2324.03	0.0034	1.46297
a3	a3.a1	pepa3a1b16	02_T1_1b_HCDOT	15888	34.81	KTQNSYEESQELDFQDAK	K1:+28.0313 - K18:+28.0313 - K1:+28.0313 - S9:+79.96633	9	9	1	a3.a1.a1	5.3e-08	3	2324.04	2324.03	0.0022	0.94663
a3	a3.a1	pepa3a1a9	02_T1_1b_HCDOT	16904	36.35	EDKTQNSYEESQELDFQDAK	K3:+36.0756 - K20:+36.0756 - E1:+36.0756 - S11:+79.96633	11	11	1	a3.a1.a1	1.7e-08	3	2592.24	2592.24	0.0027	1.04157
a3	a3.a1	pepa3a1a9	28_T3_1b_HCDOT	14493	36.25	EDKTQNSYEESQELDFQDAK	K3:+36.0756 - K20:+36.0756 - E1:+36.0756 - S11:+79.96633	11	11	1	a3.a1.a1	1.3e-05	3	2592.24	2592.24	0.0014	0.540074
a3	a3.a1	pepa3a1a9	01_T1_1a_HCDOT	15709	36.28	EDKTQNSYEESQELDFQDAK	K3:+36.0756 - K20:+36.0756 - E1:+36.0756 - S11:+79.96633	11	11	1	a3.a1.a1	6.1e-08	3	2592.24	2592.24	0.0062	2.39176
a3	a3.a1	pepa3a1b27	27_T3_1a_HCDOT	16834	39.85	TQNSYEESQELDFQDAK	K17:+36.0756 - T1:+36.0756 - S8:+79.96633	8	8	1	a3.a1.a1	1e-14	2	2184	2184	0.0031	1.41942
a3	a3.a1	pepa3a1b27	28_T3_1b_HCDOT	16764	39.83	TQNSYEESQELDFQDAK	K17:+36.0756 - T1:+36.0756 - S8:+79.96633	8	8	1	a3.a1.a1	1.3e-12	3	2184	2184	0.002	0.915753
a3	a3.a1	pepa3a1b27	02_T1_1b_HCDOT	19348	39.98	TQNSYEESQELDFQDAK	K17:+36.0756 - T1:+36.0756 - S8:+79.96633	8	8	1	a3.a1.a1	4.7e-14	2	2184	2184	0.0046	2.10623
a3	a3.a1	pepa3a1b27	27_T3_1a_HCDOT	16822	39.83	TQNSYEESQELDFQDAK	K17:+36.0756 - T1:+36.0756 - S8:+79.96633	8	8	1	a3.a1.a1	8.9e-11	3	2184	2184	0.0068	3.11356
a3	a3.a1	pepa3a1b27	02_T1_1b_HCDOT	19330	39.95	TQNSYEESQELDFQDAK	K17:+36.0756 - T1:+36.0756 - S8:+79.96633	8	8	1	a3.a1.a1	1e-10	3	2184	2184	0.0053	2.42674
a3	a3.a1	pepa3a1b27	01_T1_1a_HCDOT	18126	39.83	TQNSYEESQELDFQDAK	K17:+36.0756 - T1:+36.0756 - S8:+79.96633	8	8	1	a3.a1.a1	1.7e-09	3	2184	2184	0.004	1.83151
a3	a3.a1	pepa3a1b27	01_T1_1a_HCDOT	18140	39.85	TQNSYEESQELDFQDAK	K17:+36.0756 - T1:+36.0756 - S8:+79.96633	8	8	1	a3.a1.a1	1.1e-12	2	2184	2184	0.0058	2.65568
a3	a3.a1	pepa3a1b27	28_T3_1b_HCDOT	16783	39.85	TQNSYEESQELDFQDAK	K17:+36.0756 - T1:+36.0756 - S8:+79.96633	8	8	1	a3.a1.a1	1.6e-12	2	2184	2184	0.0033	1.51099
a3	a3.a1	pepa3a1b27	03_T1_2a_HCDOT	16451	40.11	TQNSYEESQELDFQDAK	K17:+36.0756 - T1:+36.0756 - S8:+79.96633	8	8	1	a3.a1.a1	5.4e-07	2	2184.01	2184	0.01	4.57876
a3	a3.a1	pepa3a1b28	02_T1_1b_HCDOT	20041	41.06	YEESQELDFQDAK	K13:+28.0313 - Y1:+28.0313 - S4:+79.96633	4	4	1	a3.a1.a1	9.1e-07	2	1737.73	1737.73	0.0057	3.28015
a3	a3.a1	pepa3a1b28	14_T2_1a_HCDOT	18349	40.7	YEESQELDFQDAK	K13:+28.0313 - Y1:+28.0313 - S4:+79.96633	4	4	1	a3.a1.a1	1.2e-05	2	1737.73	1737.73	0.0034	1.95658
a3	a3.a1	pepa3a1b28	15_T2_1b_HCDOT	18879	40.73	YEESQELDFQDAK	K13:+28.0313 - Y1:+28.0313 - S4:+79.96633	4	4	1	a3.a1.a1	8e-07	2	1737.73	1737.73	0.0053	3.04996
a3	a3.a1	pepa3a1b28	41_T4_1b_HCDOT	17575	41.01	YEESQELDFQDAK	K13:+28.0313 - Y1:+28.0313 - S4:+79.96633	4	4	1	a3.a1.a1	1.3e-06	2	1737.73	1737.73	0.0037	2.12922
a3	a3.a1	pepa3a1b28	28_T3_1b_HCDOT	17372	40.85	YEESQELDFQDAK	K13:+28.0313 - Y1:+28.0313 - S4:+79.96633	4	4	1	a3.a1.a1	2e-05	2	1737.73	1737.73	0.0035	2.01413
a3	a3.a1	pepa3a1b28	27_T3_1a_HCDOT	17448	40.85	YEESQELDFQDAK	K13:+28.0313 - Y1:+28.0313 - S4:+79.96633	4	4	1	a3.a1.a1	1.3e-05	2	1737.73	1737.73	0.002	1.15093
a3	a3.a1	pepa3a1b28	01_T1_1a_HCDOT	18805	40.88	YEESQELDFQDAK	K13:+28.0313 - Y1:+28.0313 - S4:+79.96633	4	4	1	a3.a1.a1	2e-06	2	1737.72	1737.73	-0.0025	-1.43866
a3	a3.a1	pepa3a1b28	40_T4_1a_HCDOT	17322	40.88	YEESQELDFQDAK	K13:+28.0313 - Y1:+28.0313 - S4:+79.96633	4	4	1	a3.a1.a1	5.8e-08	2	1737.73	1737.73	0.0057	3.28015
a3	a3.a1	pepa3a1b24	02_T1_1b_HCDOT	16623	35.93	SEDKTQNSYEESQELDFQDAK	K4:+36.0756 - K21:+36.0756 - S1:+36.0756 - S12:+79.96633	12	12	1	a3.a1.a1	4.4e-10	3	2679.27	2679.27	0.0038	1.4183
a3	a3.a1	pepa3a1a2	02_T1_1b_HCDOT	17753	37.6	DKTQNSYEESQELDFQDAK	K2:+28.0313 - K19:+28.0313 - D1:+28.0313 - S10:+79.96633	10	10	1	a3.a1.a1	0.00011	3	2439.06	2439.06	0.0041	1.68098
a3	a3.a1	pepa3a1b10	02_T1_1b_HCDOT	18337	38.46	EESQELDFQDAK	K12:+36.0756 - E1:+36.0756 - S3:+79.96633	3	3	1	a3.a1.a1	0.00023	2	1590.75	1590.75	0.0034	2.13735
a3	a3.a1	pepa3a1b10	28_T3_1b_HCDOT	15752	38.25	EESQELDFQDAK	K12:+36.0756 - E1:+36.0756 - S3:+79.96633	3	3	1	a3.a1.a1	1.5e-08	2	1590.75	1590.75	0.0026	1.63445
a3	a3.a1	pepa3a1b25	28_T3_1b_HCDOT	16765	39.83	TQNSYEESQELDFQDAK	K17:+28.0313 - T1:+28.0313 - S8:+79.96633	8	8	1	a3.a1.a1	1.7e-06	3	2167.91	2167.91	0.001	0.461274
a3	a3.a1	pepa3a1b25	15_T2_1b_HCDOT	18258	39.75	TQNSYEESQELDFQDAK	K17:+28.0313 - T1:+28.0313 - S8:+79.96633	8	8	1	a3.a1.a1	3.1e-07	3	2167.91	2167.91	0.0017	0.784166
a3	a3.a1	pepa3a1b25	28_T3_1b_HCDOT	16749	39.8	TQNSYEESQELDFQDAK	K17:+28.0313 - T1:+28.0313 - S8:+79.96633	8	8	1	a3.a1.a1	1.2e-05	2	2167.91	2167.91	0.0033	1.52221
a3	a3.a1	pepa3a1b25	41_T4_1b_HCDOT	16987	40.03	TQNSYEESQELDFQDAK	K17:+28.0313 - T1:+28.0313 - S8:+79.96633	8	8	1	a3.a1.a1	5.5e-09	3	2167.91	2167.91	0.0026	1.19931
a3	a3.a1	pepa3a1b25	15_T2_1b_HCDOT	18272	39.76	TQNSYEESQELDFQDAK	K17:+28.0313 - T1:+28.0313 - S8:+79.96633	8	8	1	a3.a1.a1	2.6e-09	2	2167.91	2167.91	0.0031	1.42995
a3	a3.a1	pepa3a1b25	27_T3_1a_HCDOT	16802	39.8	TQNSYEESQELDFQDAK	K17:+28.0313 - T1:+28.0313 - S8:+79.96633	8	8	1	a3.a1.a1	3.5e-08	2	2167.91	2167.91	0.006	2.76765
a3	a3.a1	pepa3a1b25	02_T1_1b_HCDOT	19374	40.01	TQNSYEESQELDFQDAK	K17:+28.0313 - T1:+28.0313 - S8:+79.96633	8	8	1	a3.a1.a1	2.3e-06	2	2167.91	2167.91	0.0057	2.62926
a3	a3.a1	pepa3a1b25	40_T4_1a_HCDOT	16647	39.78	TQNSYEESQELDFQDAK	K17:+28.0313 - T1:+28.0313 - S8:+79.96633	8	8	1	a3.a1.a1	2e-10	2	2167.91	2167.91	0.0067	3.09054
a3	a3.a1	pepa3a1b25	40_T4_1a_HCDOT	16617	39.73	TQNSYEESQELDFQDAK	K17:+28.0313 - T1:+28.0313 - S8:+79.96633	8	8	1	a3.a1.a1	6.3e-08	3	2167.91	2167.91	0.0024	1.10706
a3	a3.a1	pepa3a1b25	41_T4_1b_HCDOT	16990	40.03	TQNSYEESQELDFQDAK	K17:+28.0313 - T1:+28.0313 - S8:+79.96633	8	8	1	a3.a1.a1	2e-11	2	2167.91	2167.91	0.0065	2.99828
a3	a3.a1	pepa3a1b25	14_T2_1a_HCDOT	17734	39.73	TQNSYEESQELDFQDAK	K17:+28.0313 - T1:+28.0313 - S8:+79.96633	8	8	1	a3.a1.a1	8.7e-09	3	2167.91	2167.91	0.0041	1.89123
a3	a3.a1	pepa3a1b25	27_T3_1a_HCDOT	16801	39.8	TQNSYEESQELDFQDAK	K17:+28.0313 - T1:+28.0313 - S8:+79.96633	8	8	1	a3.a1.a1	3.1e-09	3	2167.91	2167.91	0.0041	1.89123
a3	a3.a1	pepa3a1b25	40_T4_1a_HCDOT	16652	39.78	TQNSYEESQELDFQDAK	K17:+28.0313 - T1:+28.0313 - S8:+79.96633	8	8	1	a3.a1.a1	2.6e-07	3	2167.91	2167.91	0.0057	2.62926
a3	a3.a1	pepa3a1b19	02_T1_1b_HCDOT	19570	40.31	QNSYEESQELDFQDAK	K16:+36.0756 - Q1:+36.0756 - S3:+79.96633	3	3 4 7	1	a3.a1.a1	9.8e-07	2	2082.95	2082.95	0.0041	1.96836
a3	a3.a1	pepa3a1b17	14_T2_1a_HCDOT	14097	34.23	KTQNSYEESQELDFQDAK	K1:+32.0564 - K18:+32.0564 - K1:+32.0564 - S9:+79.96633	9	6 9	1	a3.a1.a1	1.7e-09	3	2336.11	2336.11	-0.0005	-0.214031
a3	a3.a1	pepa3a1b17	14_T2_1a_HCDOT	14135	34.3	KTQNSYEESQELDFQDAK	K1:+32.0564 - K18:+32.0564 - K1:+32.0564 - S9:+79.96633	9	6 9	1	a3.a1.a1	0.00021	2	2336.11	2336.11	0.0032	1.3698
a3	a3.a1	pepa3a1b17	15_T2_1b_HCDOT	15119	34.85	KTQNSYEESQELDFQDAK	K1:+32.0564 - K18:+32.0564 - K1:+32.0564 - S9:+79.96633	9	6 9	1	a3.a1.a1	0.0001	3	2336.11	2336.11	-0.0003	-0.128419
a3	a3.a1	pepa3a1a7	14_T2_1a_HCDOT	15327	36.1	EDKTQNSYEESQELDFQDAK	K3:+28.0313 - K20:+28.0313 - E1:+28.0313 - S11:+79.96633	11	11	1	a3.a1.a1	8.2e-06	3	2568.11	2568.1	0.0052	2.02484
a3	a3.a1	pepa3a1a7	28_T3_1b_HCDOT	14499	36.25	EDKTQNSYEESQELDFQDAK	K3:+28.0313 - K20:+28.0313 - E1:+28.0313 - S11:+79.96633	11	11	1	a3.a1.a1	0.00012	3	2568.11	2568.1	0.0056	2.1806
a3	a3.a1	pepa3a1b26	41_T4_1b_HCDOT	16988	40.03	TQNSYEESQELDFQDAK	K17:+32.0564 - T1:+32.0564 - S8:+79.96633	8	8	1	a3.a1.a1	9.4e-07	2	2175.96	2175.96	0.0063	2.89528
a3	a3.a1	pepa3a1b26	41_T4_1b_HCDOT	16968	40	TQNSYEESQELDFQDAK	K17:+32.0564 - T1:+32.0564 - S8:+79.96633	8	8	1	a3.a1.a1	7.2e-07	2	2175.96	2175.96	0.0012	0.551481
a3	a3.a1	pepa3a1b26	40_T4_1a_HCDOT	16632	39.76	TQNSYEESQELDFQDAK	K17:+32.0564 - T1:+32.0564 - S8:+79.96633	8	8	1	a3.a1.a1	4.6e-14	2	2175.96	2175.96	0.0061	2.80336
a3	a3.a1	pepa3a1b26	15_T2_1b_HCDOT	18216	39.68	TQNSYEESQELDFQDAK	K17:+32.0564 - T1:+32.0564 - S8:+79.96633	8	8	1	a3.a1.a1	2.6e-06	2	2175.96	2175.96	0.0041	1.88423
a3	a3.a1	pepa3a1b26	40_T4_1a_HCDOT	16634	39.76	TQNSYEESQELDFQDAK	K17:+32.0564 - T1:+32.0564 - S8:+79.96633	8	8	1	a3.a1.a1	2.2e-09	3	2175.96	2175.96	0.0061	2.80336
a3	a3.a1	pepa3a1b26	14_T2_1a_HCDOT	17664	39.63	TQNSYEESQELDFQDAK	K17:+32.0564 - T1:+32.0564 - S8:+79.96633	8	8	1	a3.a1.a1	2.6e-07	3	2175.96	2175.96	0.0027	1.24083
a3	a3.a1	pepa3a1b26	41_T4_1b_HCDOT	16986	40.03	TQNSYEESQELDFQDAK	K17:+32.0564 - T1:+32.0564 - S8:+79.96633	8	8	1	a3.a1.a1	1.1e-11	3	2175.96	2175.96	0.0063	2.89528
a3	a3.a1	pepa3a1b26	40_T4_1a_HCDOT	16620	39.73	TQNSYEESQELDFQDAK	K17:+32.0564 - T1:+32.0564 - S8:+79.96633	8	8	1	a3.a1.a1	2.7e-08	2	2175.97	2175.96	0.0083	3.81441
a3	a3.a1	pepa3a1b29	14_T2_1a_HCDOT	18299	40.63	YEESQELDFQDAK	K13:+32.0564 - Y1:+32.0564 - S4:+79.96633	4	4	1	a3.a1.a1	9.2e-05	2	1745.78	1745.78	0.0035	2.00484
a3	a3.a1	pepa3a1b29	15_T2_1b_HCDOT	18848	40.7	YEESQELDFQDAK	K13:+32.0564 - Y1:+32.0564 - S4:+79.96633	4	4	1	a3.a1.a1	6.9e-08	2	1745.78	1745.78	0.0046	2.63493
a3	a3.a1	pepa3a1a8	41_T4_1b_HCDOT	14791	36.6	EDKTQNSYEESQELDFQDAK	K3:+32.0564 - K20:+32.0564 - E1:+32.0564 - S11:+79.96633	11	11	1	a3.a1.a1	3.4e-06	3	2580.18	2580.18	0.0039	1.51152
a3	a3.a1	pepa3a1a8	15_T2_1b_HCDOT	15893	36.06	EDKTQNSYEESQELDFQDAK	K3:+32.0564 - K20:+32.0564 - E1:+32.0564 - S11:+79.96633	11	11	1	a3.a1.a1	1.4e-11	3	2580.18	2580.18	0.0015	0.581355
a3	a3.a1	pepa3a1a3	15_T2_1b_HCDOT	16696	37.33	DKTQNSYEESQELDFQDAK	K2:+32.0564 - K19:+32.0564 - D1:+32.0564 - S10:+79.96633	10	10	1	a3.a1.a1	7.8e-08	3	2451.14	2451.14	0.0037	1.5095
a3	a3.a1	pepa3a1b23	41_T4_1b_HCDOT	14406	35.98	SEDKTQNSYEESQELDFQDAK	K4:+32.0564 - K21:+32.0564 - S1:+32.0564 - S12:+79.96633	12	12	1	a3.a1.a1	3e-09	3	2667.22	2667.21	0.0078	2.9244
a3	a3.a1	pepa3a1b23	40_T4_1a_HCDOT	14020	35.65	SEDKTQNSYEESQELDFQDAK	K4:+32.0564 - K21:+32.0564 - S1:+32.0564 - S12:+79.96633	12	12	1	a3.a1.a1	7.8e-14	3	2667.22	2667.21	0.0054	2.02459
a3	a3.a2	pepa3a2b15	01_T1_1a_HCDOT	24346	49.11	KIEADGDTSPLDAFIQK	K1:+36.0756 - K17:+36.0756 - K1:+36.0756 - T8:+79.96633	8	8 9	1	a3.a2.a1	1.6e-10	2	2036.14	2036.13	0.0054	2.65209
a3	a3.a2	pepa3a2b15	27_T3_1a_HCDOT	22911	49.26	KIEADGDTSPLDAFIQK	K1:+36.0756 - K17:+36.0756 - K1:+36.0756 - T8:+79.96633	8	8 9	1	a3.a2.a1	3.1e-07	2	2036.14	2036.13	0.0032	1.57161
a3	a3.a2	pepa3a2b15	28_T3_1b_HCDOT	22807	49.33	KIEADGDTSPLDAFIQK	K1:+36.0756 - K17:+36.0756 - K1:+36.0756 - T8:+79.96633	8	8 9	1	a3.a2.a1	1.9e-09	2	2036.13	2036.13	0.0006	0.294676
a3	a3.a2	pepa3a2b15	03_T1_2a_HCDOT	22090	49.68	KIEADGDTSPLDAFIQK	K1:+36.0756 - K17:+36.0756 - K1:+36.0756 - T8:+79.96633	8	8 9	1	a3.a2.a1	6e-07	2	2036.14	2036.13	0.0068	3.33967
a3	a3.a2	pepa3a2b15	27_T3_1a_HCDOT	22808	49.11	KIEADGDTSPLDAFIQK	K1:+36.0756 - K17:+36.0756 - K1:+36.0756 - S9:+79.96633	9	8 9	1	a3.a2.a1	1.9e-06	3	2036.13	2036.13	0.0027	1.32604
a3	a3.a2	pepa3a2b15	27_T3_1a_HCDOT	23269	49.81	KIEADGDTSPLDAFIQK	K1:+36.0756 - K17:+36.0756 - K1:+36.0756 - S9:+79.96633	9	8 9	1	a3.a2.a1	5.6e-08	3	2036.14	2036.13	0.0047	2.3083
a3	a3.a2	pepa3a2b15	01_T1_1a_HCDOT	24293	49.05	KIEADGDTSPLDAFIQK	K1:+36.0756 - K17:+36.0756 - K1:+36.0756 - S9:+79.96633	9	8 9	1	a3.a2.a1	9.8e-07	3	2036.14	2036.13	0.0031	1.52249
a3	a3.a2	pepa3a2b15	28_T3_1b_HCDOT	22779	49.3	KIEADGDTSPLDAFIQK	K1:+36.0756 - K17:+36.0756 - K1:+36.0756 - S9:+79.96633	9	8 9	1	a3.a2.a1	2e-07	3	2036.13	2036.13	0.0018	0.884029
a3	a3.a2	pepa3a2b15	03_T1_2a_HCDOT	22076	49.65	KIEADGDTSPLDAFIQK	K1:+36.0756 - K17:+36.0756 - K1:+36.0756 - S9:+79.96633	9	8 9	1	a3.a2.a1	2.5e-06	3	2036.13	2036.13	0.0023	1.12959
a3	a3.a2	pepa3a2b15	04_T1_2b_HCDOT	21380	49.65	KIEADGDTSPLDAFIQK	K1:+36.0756 - K17:+36.0756 - K1:+36.0756 - S9:+79.96633	9	8 9	1	a3.a2.a1	1.2e-05	3	2036.14	2036.13	0.0038	1.86628
a3	a3.a2	pepa3a2b15	02_T1_1b_HCDOT	25785	49.66	KIEADGDTSPLDAFIQK	K1:+36.0756 - K17:+36.0756 - K1:+36.0756 - S9:+79.96633	9	8 9	1	a3.a2.a1	2.6e-07	3	2036.14	2036.13	0.0036	1.76806
a3	a3.a2	pepa3a2b13	28_T3_1b_HCDOT	22850	49.4	KIEADGDTSPLDAFIQK	K1:+28.0313 - K17:+28.0313 - K1:+28.0313 - T8:+79.96633	8	8 9	1	a3.a2.a1	6.3e-09	2	2012	2012	0.0043	2.13718
a3	a3.a2	pepa3a2b13	40_T4_1a_HCDOT	22836	49.36	KIEADGDTSPLDAFIQK	K1:+28.0313 - K17:+28.0313 - K1:+28.0313 - T8:+79.96633	8	8 9	1	a3.a2.a1	5.2e-13	2	2012	2012	0.0043	2.13718
a3	a3.a2	pepa3a2b13	27_T3_1a_HCDOT	22871	49.2	KIEADGDTSPLDAFIQK	K1:+28.0313 - K17:+28.0313 - K1:+28.0313 - T8:+79.96633	8	8 9	1	a3.a2.a1	3.7e-09	3	2012	2012	0.0032	1.59046
a3	a3.a2	pepa3a2b13	28_T3_1b_HCDOT	23751	50.8	KIEADGDTSPLDAFIQK	K1:+28.0313 - K17:+28.0313 - K1:+28.0313 - T8:+79.96633	8	8 9	1	a3.a2.a1	0.00039	2	2012.01	2012	0.0079	3.92644
a3	a3.a2	pepa3a2b13	14_T2_1a_HCDOT	23750	48.86	KIEADGDTSPLDAFIQK	K1:+28.0313 - K17:+28.0313 - K1:+28.0313 - T8:+79.96633	8	8 9	1	a3.a2.a1	7e-10	2	2012	2012	0.0013	0.646124
a3	a3.a2	pepa3a2b13	27_T3_1a_HCDOT	23362	49.95	KIEADGDTSPLDAFIQK	K1:+28.0313 - K17:+28.0313 - K1:+28.0313 - T8:+79.96633	8	8 9	1	a3.a2.a1	0.00016	2	2012.01	2012	0.0076	3.77734
a3	a3.a2	pepa3a2b13	15_T2_1b_HCDOT	24445	49.28	KIEADGDTSPLDAFIQK	K1:+28.0313 - K17:+28.0313 - K1:+28.0313 - T8:+79.96633	8	8 9	1	a3.a2.a1	1.6e-14	2	2012	2012	0.0044	2.18688
a3	a3.a2	pepa3a2b13	02_T1_1b_HCDOT	25747	49.61	KIEADGDTSPLDAFIQK	K1:+28.0313 - K17:+28.0313 - K1:+28.0313 - T8:+79.96633	8	8 9	1	a3.a2.a1	7.8e-11	2	2012	2012	0.0043	2.13718
a3	a3.a2	pepa3a2b13	27_T3_1a_HCDOT	22858	49.18	KIEADGDTSPLDAFIQK	K1:+28.0313 - K17:+28.0313 - K1:+28.0313 - T8:+79.96633	8	8 9	1	a3.a2.a1	1.3e-10	2	2012	2012	0.0057	2.833
a3	a3.a2	pepa3a2b13	40_T4_1a_HCDOT	22857	49.4	KIEADGDTSPLDAFIQK	K1:+28.0313 - K17:+28.0313 - K1:+28.0313 - T8:+79.96633	8	8 9	1	a3.a2.a1	2.4e-07	3	2012	2012	0.0012	0.596422
a3	a3.a2	pepa3a2b13	01_T1_1a_HCDOT	24324	49.08	KIEADGDTSPLDAFIQK	K1:+28.0313 - K17:+28.0313 - K1:+28.0313 - T8:+79.96633	8	8 9	1	a3.a2.a1	3.3e-08	3	2012	2012	0.0021	1.04374
a3	a3.a2	pepa3a2b13	41_T4_1b_HCDOT	23289	49.83	KIEADGDTSPLDAFIQK	K1:+28.0313 - K17:+28.0313 - K1:+28.0313 - T8:+79.96633	8	8 9	1	a3.a2.a1	4.6e-09	2	2012.01	2012	0.01	4.97018
a3	a3.a2	pepa3a2b13	14_T2_1a_HCDOT	23731	48.83	KIEADGDTSPLDAFIQK	K1:+28.0313 - K17:+28.0313 - K1:+28.0313 - T8:+79.96633	8	8 9	1	a3.a2.a1	2e-08	3	2012	2012	-0.001	-0.497018
a3	a3.a2	pepa3a2b13	42_T4_2a_HCDOT	19345	50.15	KIEADGDTSPLDAFIQK	K1:+28.0313 - K17:+28.0313 - K1:+28.0313 - T8:+79.96633	8	8 9	1	a3.a2.a1	3.9e-05	2	2012	2012	0.0017	0.844931
a3	a3.a2	pepa3a2b13	41_T4_1b_HCDOT	23901	50.76	KIEADGDTSPLDAFIQK	K1:+28.0313 - K17:+28.0313 - K1:+28.0313 - S9:+79.96633	9	8 9	1	a3.a2.a1	7.3e-06	3	2012	2012	0.0018	0.894633
a3	a3.a2	pepa3a2b13	02_T1_1b_HCDOT	25746	49.61	KIEADGDTSPLDAFIQK	K1:+28.0313 - K17:+28.0313 - K1:+28.0313 - S9:+79.96633	9	8 9	1	a3.a2.a1	4e-06	3	2012	2012	0.004	1.98807
a3	a3.a2	pepa3a2b13	28_T3_1b_HCDOT	23298	50.1	KIEADGDTSPLDAFIQK	K1:+28.0313 - K17:+28.0313 - K1:+28.0313 - S9:+79.96633	9	8 9	1	a3.a2.a1	4.6e-07	3	2012	2012	0.0018	0.894633
a3	a3.a2	pepa3a2b13	15_T2_1b_HCDOT	24446	49.28	KIEADGDTSPLDAFIQK	K1:+28.0313 - K17:+28.0313 - K1:+28.0313 - S9:+79.96633	9	8 9	1	a3.a2.a1	1.9e-07	3	2012	2012	0.0018	0.894633
a3	a3.a2	pepa3a2b13	04_T1_2b_HCDOT	21466	49.78	KIEADGDTSPLDAFIQK	K1:+28.0313 - K17:+28.0313 - K1:+28.0313 - S9:+79.96633	9	8 9	1	a3.a2.a1	9.8e-07	3	2012	2012	0.0029	1.44135
a3	a3.a2	pepa3a2b13	03_T1_2a_HCDOT	22124	49.73	KIEADGDTSPLDAFIQK	K1:+28.0313 - K17:+28.0313 - K1:+28.0313 - S9:+79.96633	9	8 9	1	a3.a2.a1	4e-07	3	2012.01	2012	0.0062	3.08151
a3	a3.a2	pepa3a2b13	17_T2_2b_HCDOT	20517	49.36	KIEADGDTSPLDAFIQK	K1:+28.0313 - K17:+28.0313 - K1:+28.0313 - S9:+79.96633	9	8 9	1	a3.a2.a1	0.00028	3	2012	2012	-0.0004	-0.198807
a3	a3.a2	pepa3a2b13	28_T3_1b_HCDOT	22852	49.4	KIEADGDTSPLDAFIQK	K1:+28.0313 - K17:+28.0313 - K1:+28.0313 - S9:+79.96633	9	8 9	1	a3.a2.a1	3.7e-07	3	2012	2012	0.0032	1.59046
a3	a3.a2	pepa3a2b13	41_T4_1b_HCDOT	23274	49.8	KIEADGDTSPLDAFIQK	K1:+28.0313 - K17:+28.0313 - K1:+28.0313 - S9:+79.96633	9	8 9	1	a3.a2.a1	1.7e-06	3	2012.01	2012	0.0063	3.13121
a3	a3.a2	pepa3a2b13	15_T2_1b_HCDOT	25121	50.3	KIEADGDTSPLDAFIQK	K1:+28.0313 - K17:+28.0313 - K1:+28.0313 - S9:+79.96633	9	8 9	1	a3.a2.a1	3.4e-05	3	2012	2012	0.003	1.49105
a3	a3.a2	pepa3a2b12	28_T3_1b_HCDOT	27841	57.06	IEADGDTSPLDAFIQK	K16:+36.0756 - I1:+36.0756 - T7:+79.96633	7	7	1	a3.a2.a1	1.5e-08	2	1871.96	1871.96	0.0012	0.641039
a3	a3.a2	pepa3a2b12	01_T1_1a_HCDOT	29719	57.16	IEADGDTSPLDAFIQK	K16:+36.0756 - I1:+36.0756 - T7:+79.96633	7	7	1	a3.a2.a1	1.2e-06	2	1871.96	1871.96	0.002	1.0684
a3	a3.a2	pepa3a2b12	02_T1_1b_HCDOT	30835	57.25	IEADGDTSPLDAFIQK	K16:+36.0756 - I1:+36.0756 - T7:+79.96633	7	7	1	a3.a2.a1	2.1e-06	2	1871.97	1871.96	0.006	3.20519
a3	a3.a2	pepa3a2b14	15_T2_1b_HCDOT	24418	49.23	KIEADGDTSPLDAFIQK	K1:+32.0564 - K17:+32.0564 - K1:+32.0564 - T8:+79.96633	8	8 9	1	a3.a2.a1	3.7e-09	3	2024.08	2024.07	0.0043	2.12443
a3	a3.a2	pepa3a2b14	14_T2_1a_HCDOT	23749	48.85	KIEADGDTSPLDAFIQK	K1:+32.0564 - K17:+32.0564 - K1:+32.0564 - T8:+79.96633	8	8 9	1	a3.a2.a1	4.4e-08	2	2024.08	2024.07	0.0012	0.592864
a3	a3.a2	pepa3a2b14	40_T4_1a_HCDOT	22856	49.38	KIEADGDTSPLDAFIQK	K1:+32.0564 - K17:+32.0564 - K1:+32.0564 - T8:+79.96633	8	8 9	1	a3.a2.a1	1.4e-08	2	2024.08	2024.07	0.0044	2.17383
a3	a3.a2	pepa3a2b14	14_T2_1a_HCDOT	23684	48.76	KIEADGDTSPLDAFIQK	K1:+32.0564 - K17:+32.0564 - K1:+32.0564 - T8:+79.96633	8	8 9	1	a3.a2.a1	1.7e-07	3	2024.07	2024.07	0.0004	0.197621
a3	a3.a2	pepa3a2b14	15_T2_1b_HCDOT	24472	49.31	KIEADGDTSPLDAFIQK	K1:+32.0564 - K17:+32.0564 - K1:+32.0564 - T8:+79.96633	8	8 9	1	a3.a2.a1	4.4e-09	2	2024.08	2024.07	0.0053	2.61848
a3	a3.a2	pepa3a2b14	41_T4_1b_HCDOT	23304	49.85	KIEADGDTSPLDAFIQK	K1:+32.0564 - K17:+32.0564 - K1:+32.0564 - T8:+79.96633	8	8 9	1	a3.a2.a1	4.1e-07	2	2024.08	2024.07	0.0039	1.92681
a3	a3.a2	pepa3a2b14	41_T4_1b_HCDOT	23251	49.76	KIEADGDTSPLDAFIQK	K1:+32.0564 - K17:+32.0564 - K1:+32.0564 - S9:+79.96633	9	8 9	1	a3.a2.a1	1.7e-06	3	2024.08	2024.07	0.0032	1.58097
a3	a3.a2	pepa3a2b14	17_T2_2b_HCDOT	20469	49.28	KIEADGDTSPLDAFIQK	K1:+32.0564 - K17:+32.0564 - K1:+32.0564 - S9:+79.96633	9	8 9	1	a3.a2.a1	1.6e-05	3	2024.08	2024.07	0.0046	2.27264
a3	a3.a2	pepa3a2b14	40_T4_1a_HCDOT	23277	50.03	KIEADGDTSPLDAFIQK	K1:+32.0564 - K17:+32.0564 - K1:+32.0564 - S9:+79.96633	9	8 9	1	a3.a2.a1	3.1e-07	3	2024.08	2024.07	0.0037	1.828
a3	a3.a2	pepa3a2b14	40_T4_1a_HCDOT	22815	49.33	KIEADGDTSPLDAFIQK	K1:+32.0564 - K17:+32.0564 - K1:+32.0564 - S9:+79.96633	9	8 9	1	a3.a2.a1	8.8e-09	3	2024.08	2024.07	0.0021	1.03751
a3	a3.a2	pepa3a2b14	40_T4_1a_HCDOT	23313	50.08	KIEADGDTSPLDAFIQK	K1:+32.0564 - K17:+32.0564 - K1:+32.0564 - S9:+79.96633	9	8 9	1	a3.a2.a1	2.6e-06	3	2024.08	2024.07	0.0056	2.7667
a3	a3.a2	pepa3a2b14	14_T2_1a_HCDOT	24156	49.46	KIEADGDTSPLDAFIQK	K1:+32.0564 - K17:+32.0564 - K1:+32.0564 - S9:+79.96633	9	8 9	1	a3.a2.a1	2.4e-05	3	2024.08	2024.07	0.0008	0.395242
a3	a3.a2	pepa3a2b14	15_T2_1b_HCDOT	24893	49.96	KIEADGDTSPLDAFIQK	K1:+32.0564 - K17:+32.0564 - K1:+32.0564 - S9:+79.96633	9	8 9	1	a3.a2.a1	1.8e-06	3	2024.08	2024.07	0.0026	1.28454
a3	a3.a2	pepa3a2b14	16_T2_2a_HCDOT	20783	49.4	KIEADGDTSPLDAFIQK	K1:+32.0564 - K17:+32.0564 - K1:+32.0564 - S9:+79.96633	9	8 9	1	a3.a2.a1	3e-07	3	2024.08	2024.07	0.0017	0.83989
a3	a3.a2	pepa3a2b11	14_T2_1a_HCDOT	29202	56.98	IEADGDTSPLDAFIQK	K16:+32.0564 - I1:+32.0564 - S8:+79.96633	8	8	1	a3.a2.a1	7.1e-05	3	1863.92	1863.92	0.0008	0.429202
a3	a3.a3	pepa3a3a4	03_T1_2a_HCDOT	20331	46.78	EAEINAGVTETDSILDK	K17:+28.0313 - E1:+28.0313 - T9:+79.96633	9	9 11	1	a3.a3.a1	7.6e-05	2	1940.92	1940.91	0.0075	3.86417
a3	a3.a3	pepa3a3a4	28_T3_1b_HCDOT	20979	46.51	EAEINAGVTETDSILDK	K17:+28.0313 - E1:+28.0313 - T9:+79.96633	9	9 11	1	a3.a3.a1	4.4e-05	2	1940.92	1940.91	0.0061	3.14285
a3	a3.a3	pepa3a3a5	16_T2_2a_HCDOT	19051	46.38	EAEINAGVTETDSILDK	K17:+32.0564 - E1:+32.0564 - T9:+79.96633	9	9 11	1	a3.a3.a1	9.3e-06	2	1948.96	1948.96	0.0024	1.23143
a3	a3.a3	pepa3a3a5	14_T2_1a_HCDOT	22113	46.4	EAEINAGVTETDSILDK	K17:+32.0564 - E1:+32.0564 - T9:+79.96633	9	9 11	1	a3.a3.a1	1.3e-07	2	1948.96	1948.96	0.0013	0.667022
a3	a3.a3	pepa3a3a5	17_T2_2b_HCDOT	18820	46.4	EAEINAGVTETDSILDK	K17:+32.0564 - E1:+32.0564 - T11:+79.96633	11	9 11	1	a3.a3.a1	0.00025	2	1948.97	1948.96	0.0055	2.82202
a3	a3.a3	pepa3a3a6	27_T3_1a_HCDOT	21098	46.51	EAEINAGVTETDSILDK	K17:+36.0756 - E1:+36.0756 - T9:+79.96633	9	9	1	a3.a3.a1	3.4e-07	2	1957	1957	0.0016	0.817578
a3	a3.a4	pepa3a4b22	27_T3_1a_HCDOT	23334	49.91	QRQEFADSGLIGQTLANESTNSTTADETVTPITSGFGTTETK	K42:+36.0756 - Q1:+36.0756 - S19:+79.96633	19	8 19 20 22 23 24	1	a3.a4.a1	3.1e-09	3	4556.24	4556.21	0.028	6.14545
a3	a3.a4	pepa3a4b22	02_T1_1b_HCDOT	27411	52.08	QRQEFADSGLIGQTLANESTNSTTADETVTPITSGFGTTETK	K42:+36.0756 - Q1:+36.0756 - S8:+79.96633	8	8 19 20 22 23 24	1	a3.a4.a1	1e-15	3	4556.24	4556.21	0.023	5.04805
a3	a3.a4	pepa3a4b21	40_T4_1a_HCDOT	23348	50.15	QRQEFADSGLIGQTLANESTNSTTADETVTPITSGFGTTETK	K42:+32.0564 - Q1:+32.0564 - S22:+79.96633	22	14 19 20 22 23 24 28 33	1	a3.a4.a1	8.7e-06	3	4548.21	4548.18	0.032	7.03579
a3	a3.a4	pepa3a4b21	14_T2_1a_HCDOT	24764	50.36	QRQEFADSGLIGQTLANESTNSTTADETVTPITSGFGTTETK	K42:+32.0564 - Q1:+32.0564 - T33:+79.96633	33	14 19 20 22 23 24 28 33	1	a3.a4.a1	2.5e-10	3	4548.2	4548.18	0.021	4.61724
a3	a3.a4	pepa3a4b21	14_T2_1a_HCDOT	24345	49.75	QRQEFADSGLIGQTLANESTNSTTADETVTPITSGFGTTETK	K42:+32.0564 - Q1:+32.0564 - T14:+79.96633	14	14 19 20 22 23 24 28 33	1	a3.a4.a1	2.9e-10	3	4548.18	4548.18	0.0048	1.05537
a3	a3.a4	pepa3a4b20	15_T2_1b_HCDOT	26101	51.76	QRQEFADSGLIGQTLANESTNSTTADETVTPITSGFGTTETK	K42:+28.0313 - Q1:+28.0313 - S8:+79.96633	8	8	1	a3.a4.a1	1.1e-08	3	4540.16	4540.12	0.034	7.48878
a3	a3.a5	pepa3a5a1	03_T1_2a_HCDOT	28199	59.5	ASEPQASKPLLEDVEVSETIDSEAIATTVAGVTGVK	K8:+36.0756 - K36:+36.0756 - A1:+36.0756 - S17:+79.96633	17	17 19	1	a3.a5.a1	1e-15	3	3830.07	3830.06	0.017	4.43858
a4	a4.a1	pepa4a1a9	41_T4_1b_HCDOT	12339	32.63	APAAPATDPGMMGY	A1:+36.0756 - M11:+15.99491 - M12:+15.99491 - Y14:+79.96633	14	14	1	a4.a1.a1	0.00013	2	1497.62	1497.62	0.0016	1.06836
a4	a4.a1	pepa4a1a9	04_T1_2b_HCDOT	11581	32.51	APAAPATDPGMMGY	A1:+36.0756 - M11:+15.99491 - M12:+15.99491 - Y14:+79.96633	14	14	1	a4.a1.a1	5.3e-07	2	1497.62	1497.62	0.0024	1.60254
a4	a4.a1	pepa4a1a9	28_T3_1b_HCDOT	12110	32.38	APAAPATDPGMMGY	A1:+36.0756 - M11:+15.99491 - M12:+15.99491 - Y14:+79.96633	14	14	1	a4.a1.a1	0.00012	2	1497.62	1497.62	0.0011	0.734499
a4	a4.a1	pepa4a1a9	27_T3_1a_HCDOT	12123	32.51	APAAPATDPGMMGY	A1:+36.0756 - M11:+15.99491 - M12:+15.99491 - Y14:+79.96633	14	14	1	a4.a1.a1	1.7e-10	2	1497.62	1497.62	0.0009	0.600954
a4	a4.a1	pepa4a1a9	02_T1_1b_HCDOT	14430	32.65	APAAPATDPGMMGY	A1:+36.0756 - M11:+15.99491 - M12:+15.99491 - Y14:+79.96633	14	14	1	a4.a1.a1	9.8e-10	2	1497.62	1497.62	0.0031	2.06995
a4	a4.a1	pepa4a1a9	40_T4_1a_HCDOT	12064	32.56	APAAPATDPGMMGY	A1:+36.0756 - M11:+15.99491 - M12:+15.99491 - Y14:+79.96633	14	14	1	a4.a1.a1	9.8e-09	2	1497.62	1497.62	0.0029	1.93641
a4	a4.a1	pepa4a1a9	28_T3_1b_HCDOT	12164	32.46	APAAPATDPGMMGY	A1:+36.0756 - M11:+15.99491 - M12:+15.99491 - Y14:+79.96633	14	14	1	a4.a1.a1	5.2e-09	2	1497.62	1497.62	0.0033	2.2035
a4	a4.a1	pepa4a1a9	01_T1_1a_HCDOT	13179	32.58	APAAPATDPGMMGY	A1:+36.0756 - M11:+15.99491 - M12:+15.99491 - Y14:+79.96633	14	14	1	a4.a1.a1	4.8e-09	2	1497.62	1497.62	0.0039	2.60413
a4	a4.a1	pepa4a1a9	03_T1_2a_HCDOT	12178	32.56	APAAPATDPGMMGY	A1:+36.0756 - M11:+15.99491 - M12:+15.99491 - Y14:+79.96633	14	14	1	a4.a1.a1	5.1e-08	2	1497.62	1497.62	0.0028	1.86963
a4	a4.a1	pepa4a1a6	04_T1_2b_HCDOT	14396	37.55	APAAPATDPGMMGY	A1:+36.0756 - M12:+15.99491 - Y14:+79.96633	14	14	1	a4.a1.a1	0.00036	2	1481.63	1481.62	0.0029	1.95731
a4	a4.a1	pepa4a1a6	01_T1_1a_HCDOT	16741	37.8	APAAPATDPGMMGY	A1:+36.0756 - M12:+15.99491 - Y14:+79.96633	14	14	1	a4.a1.a1	9.8e-08	2	1481.63	1481.62	0.0038	2.56475
a4	a4.a1	pepa4a1a6	01_T1_1a_HCDOT	17337	38.66	APAAPATDPGMMGY	A1:+36.0756 - M11:+15.99491 - Y14:+79.96633	14	14	1	a4.a1.a1	5.2e-07	2	1481.63	1481.62	0.0031	2.0923
a4	a4.a1	pepa4a1a6	02_T1_1b_HCDOT	17764	37.61	APAAPATDPGMMGY	A1:+36.0756 - M12:+15.99491 - Y14:+79.96633	14	14	1	a4.a1.a1	1.1e-05	2	1481.63	1481.62	0.0043	2.90222
a4	a4.a1	pepa4a1a6	27_T3_1a_HCDOT	15337	37.53	APAAPATDPGMMGY	A1:+36.0756 - M12:+15.99491 - Y14:+79.96633	14	14	1	a4.a1.a1	3.8e-06	2	1481.63	1481.62	0.0031	2.0923
a4	a4.a1	pepa4a1a6	15_T2_1b_HCDOT	16748	37.41	APAAPATDPGMMGY	A1:+36.0756 - M12:+15.99491 - Y14:+79.96633	14	14	1	a4.a1.a1	1.1e-08	2	1481.63	1481.62	0.0034	2.29478
a4	a4.a1	pepa4a1a6	03_T1_2a_HCDOT	15577	38.58	APAAPATDPGMMGY	A1:+36.0756 - M11:+15.99491 - Y14:+79.96633	14	14	1	a4.a1.a1	3.9e-07	2	1481.63	1481.62	0.005	3.37468
a4	a4.a1	pepa4a1a6	28_T3_1b_HCDOT	15893	38.46	APAAPATDPGMMGY	A1:+36.0756 - M11:+15.99491 - Y14:+79.96633	14	14	1	a4.a1.a1	4.1e-06	2	1481.63	1481.62	0.0015	1.0124
a4	a4.a1	pepa4a1a6	03_T1_2a_HCDOT	15023	37.61	APAAPATDPGMMGY	A1:+36.0756 - M12:+15.99491 - Y14:+79.96633	14	14	1	a4.a1.a1	8e-06	2	1481.63	1481.62	0.0038	2.56475
a4	a4.a1	pepa4a1a6	04_T1_2b_HCDOT	14959	38.55	APAAPATDPGMMGY	A1:+36.0756 - M11:+15.99491 - Y14:+79.96633	14	14	1	a4.a1.a1	5.5e-08	2	1481.63	1481.62	0.0033	2.22729
a4	a4.a1	pepa4a1a6	30_T3_2b_HCDOT	12674	38.56	APAAPATDPGMMGY	A1:+36.0756 - M11:+15.99491 - Y14:+79.96633	14	14	1	a4.a1.a1	0.00027	2	1481.63	1481.62	0.0027	1.82233
a4	a4.a1	pepa4a1a6	30_T3_2b_HCDOT	12203	37.68	APAAPATDPGMMGY	A1:+36.0756 - M12:+15.99491 - Y14:+79.96633	14	14	1	a4.a1.a1	1.1e-07	2	1481.63	1481.62	0.0033	2.22729
a4	a4.a1	pepa4a1a6	28_T3_1b_HCDOT	15245	37.45	APAAPATDPGMMGY	A1:+36.0756 - M12:+15.99491 - Y14:+79.96633	14	14	1	a4.a1.a1	1.3e-06	2	1481.62	1481.62	0.001	0.674935
a4	a4.a1	pepa4a1a6	43_T4_2b_HCDOT	12205	37.66	APAAPATDPGMMGY	A1:+36.0756 - M12:+15.99491 - Y14:+79.96633	14	14	1	a4.a1.a1	0.00064	2	1481.63	1481.62	0.0024	1.61984
a4	a4.a1	pepa4a1a6	29_T3_2a_HCDOT	12751	38.46	APAAPATDPGMMGY	A1:+36.0756 - M11:+15.99491 - Y14:+79.96633	14	14	1	a4.a1.a1	1e-05	2	1481.63	1481.62	0.0027	1.82233
a4	a4.a1	pepa4a1a3	03_T1_2a_HCDOT	19201	44.85	APAAPATDPGMMGY	A1:+36.0756 - Y14:+79.96633	14	7 14	1	a4.a1.a1	6.5e-06	2	1465.63	1465.63	0.0047	3.20681
a4	a4.a1	pepa4a1a3	32_T3_3b_HCDOT	15177	44.1	APAAPATDPGMMGY	A1:+36.0756 - Y14:+79.96633	14	7 14	1	a4.a1.a1	0.00024	2	1465.63	1465.63	0.0022	1.50106
a4	a4.a1	pepa4a1a3	27_T3_1a_HCDOT	19548	44.11	APAAPATDPGMMGY	A1:+36.0756 - Y14:+79.96633	14	7 14	1	a4.a1.a1	1.8e-08	2	1465.63	1465.63	0.0009	0.614071
a4	a4.a1	pepa4a1a3	31_T3_3a_HCDOT	15528	44.2	APAAPATDPGMMGY	A1:+36.0756 - Y14:+79.96633	14	7 14	1	a4.a1.a1	4.8e-05	2	1465.63	1465.63	0.0027	1.84221
a4	a4.a1	pepa4a1a3	03_T1_2a_HCDOT	21863	49.31	APAAPATDPGMMGY	A1:+36.0756 - T7:+79.96633	7	7 14	1	a4.a1.a1	2e-05	2	1465.63	1465.63	0.0061	4.16204
a4	a4.a1	pepa4a1a3	29_T3_2a_HCDOT	15690	44.06	APAAPATDPGMMGY	A1:+36.0756 - Y14:+79.96633	14	7 14	1	a4.a1.a1	1.6e-07	2	1465.63	1465.63	0.0019	1.29637
a4	a4.a1	pepa4a1a3	45_T4_3b_HCDOT	15331	44.5	APAAPATDPGMMGY	A1:+36.0756 - Y14:+79.96633	14	7 14	1	a4.a1.a1	0.00014	2	1465.63	1465.63	0.0047	3.20681
a4	a4.a1	pepa4a1a3	03_T1_2a_HCDOT	18797	44.16	APAAPATDPGMMGY	A1:+36.0756 - Y14:+79.96633	14	7 14	1	a4.a1.a1	5e-08	2	1465.63	1465.63	0.0022	1.50106
a4	a4.a1	pepa4a1a3	14_T2_1a_HCDOT	20844	44.51	APAAPATDPGMMGY	A1:+36.0756 - Y14:+79.96633	14	7 14	1	a4.a1.a1	2.7e-05	2	1465.63	1465.63	-0.0008	-0.545841
a4	a4.a1	pepa4a1a3	30_T3_2b_HCDOT	15629	44.15	APAAPATDPGMMGY	A1:+36.0756 - Y14:+79.96633	14	7 14	1	a4.a1.a1	8.7e-08	2	1465.63	1465.63	0.003	2.0469
a4	a4.a1	pepa4a1a3	07_T1_4a_HCDOT	16598	44.43	APAAPATDPGMMGY	A1:+36.0756 - Y14:+79.96633	14	7 14	1	a4.a1.a1	0.00012	2	1465.63	1465.63	0.0048	3.27505
a4	a4.a1	pepa4a1a3	15_T2_1b_HCDOT	20960	44.01	APAAPATDPGMMGY	A1:+36.0756 - Y14:+79.96633	14	7 14	1	a4.a1.a1	2.2e-07	2	1465.63	1465.63	0.0031	2.11513
a4	a4.a1	pepa4a1a3	28_T3_1b_HCDOT	19381	44.01	APAAPATDPGMMGY	A1:+36.0756 - Y14:+79.96633	14	7 14	1	a4.a1.a1	1.3e-10	2	1465.63	1465.63	0.0019	1.29637
a4	a4.a1	pepa4a1a3	04_T1_2b_HCDOT	18552	44.86	APAAPATDPGMMGY	A1:+36.0756 - Y14:+79.96633	14	7 14	1	a4.a1.a1	8.4e-05	2	1465.63	1465.63	0.0041	2.79743
a4	a4.a1	pepa4a1a3	46_T4_4a_HCDOT	14898	44.28	APAAPATDPGMMGY	A1:+36.0756 - Y14:+79.96633	14	7 14	1	a4.a1.a1	4.9e-07	2	1465.63	1465.63	0.0037	2.52451
a4	a4.a1	pepa4a1a3	01_T1_1a_HCDOT	21059	44.25	APAAPATDPGMMGY	A1:+36.0756 - Y14:+79.96633	14	7 14	1	a4.a1.a1	3.2e-07	2	1465.63	1465.63	0.0036	2.45628
a4	a4.a1	pepa4a1a3	17_T2_2b_HCDOT	17685	44.36	APAAPATDPGMMGY	A1:+36.0756 - Y14:+79.96633	14	7 14	1	a4.a1.a1	0.00017	2	1465.63	1465.63	0.0019	1.29637
a4	a4.a1	pepa4a1a3	02_T1_1b_HCDOT	22141	44.25	APAAPATDPGMMGY	A1:+36.0756 - Y14:+79.96633	14	7 14	1	a4.a1.a1	5.1e-11	2	1465.63	1465.63	0.0027	1.84221
a4	a4.a1	pepa4a1a3	41_T4_1b_HCDOT	19616	44.2	APAAPATDPGMMGY	A1:+36.0756 - Y14:+79.96633	14	7 14	1	a4.a1.a1	1.3e-08	2	1465.63	1465.63	0.006	4.09381
a4	a4.a1	pepa4a1a3	28_T3_1b_HCDOT	19933	44.9	APAAPATDPGMMGY	A1:+36.0756 - Y14:+79.96633	14	7 14	1	a4.a1.a1	0.00059	2	1465.63	1465.63	0.0003	0.20469
a4	a4.a1	pepa4a1a3	27_T3_1a_HCDOT	19999	44.83	APAAPATDPGMMGY	A1:+36.0756 - Y14:+79.96633	14	7 14	1	a4.a1.a1	0.00024	2	1465.63	1465.63	0.0005	0.341151
a4	a4.a1	pepa4a1a3	29_T3_2a_HCDOT	16077	44.8	APAAPATDPGMMGY	A1:+36.0756 - Y14:+79.96633	14	7 14	1	a4.a1.a1	6.5e-12	2	1465.63	1465.63	0.0018	1.22814
a4	a4.a1	pepa4a1a3	04_T1_2b_HCDOT	18158	44.16	APAAPATDPGMMGY	A1:+36.0756 - Y14:+79.96633	14	7 14	1	a4.a1.a1	8.2e-08	2	1465.63	1465.63	0.0033	2.25159
a4	a4.a1	pepa4a1a3	43_T4_2b_HCDOT	15753	44.16	APAAPATDPGMMGY	A1:+36.0756 - Y14:+79.96633	14	7 14	1	a4.a1.a1	5.9e-06	2	1465.63	1465.63	0.0039	2.66097
a4	a4.a1	pepa4a1a3	40_T4_1a_HCDOT	19432	44.18	APAAPATDPGMMGY	A1:+36.0756 - Y14:+79.96633	14	7 14	1	a4.a1.a1	2.9e-08	2	1465.63	1465.63	0.0003	0.20469
a4	a4.a1	pepa4a1a1	04_T1_2b_HCDOT	18189	44.23	APAAPATDPGMMGY	A1:+28.0313 - Y14:+79.96633	14	14	1	a4.a1.a1	2e-09	2	1457.59	1457.58	0.0053	3.63615
a4	a4.a1	pepa4a1a1	44_T4_3a_HCDOT	15832	44.2	APAAPATDPGMMGY	A1:+28.0313 - Y14:+79.96633	14	14	1	a4.a1.a1	8.3e-07	2	1457.59	1457.58	0.0031	2.12681
a4	a4.a1	pepa4a1a1	47_T4_4b_HCDOT	15293	44.33	APAAPATDPGMMGY	A1:+28.0313 - Y14:+79.96633	14	14	1	a4.a1.a1	4.3e-05	2	1457.59	1457.58	0.002	1.37213
a4	a4.a1	pepa4a1a1	01_T1_1a_HCDOT	21365	44.7	APAAPATDPGMMGY	A1:+28.0313 - Y14:+79.96633	14	14	1	a4.a1.a1	6.3e-06	2	1457.59	1457.58	0.0033	2.26402
a4	a4.a1	pepa4a1a1	03_T1_2a_HCDOT	19098	44.68	APAAPATDPGMMGY	A1:+28.0313 - Y14:+79.96633	14	14	1	a4.a1.a1	2.7e-05	2	1457.59	1457.58	0.0037	2.53845
a4	a4.a1	pepa4a1a1	30_T3_2b_HCDOT	15646	44.16	APAAPATDPGMMGY	A1:+28.0313 - Y14:+79.96633	14	14	1	a4.a1.a1	4.8e-05	2	1457.59	1457.58	0.0027	1.85238
a4	a4.a1	pepa4a1a1	41_T4_1b_HCDOT	19657	44.26	APAAPATDPGMMGY	A1:+28.0313 - Y14:+79.96633	14	14	1	a4.a1.a1	1.4e-08	2	1457.59	1457.58	0.0045	3.0873
a4	a4.a1	pepa4a1a1	27_T3_1a_HCDOT	19569	44.15	APAAPATDPGMMGY	A1:+28.0313 - Y14:+79.96633	14	14	1	a4.a1.a1	3.9e-10	2	1457.59	1457.58	0.0016	1.09771
a4	a4.a1	pepa4a1a1	32_T3_3b_HCDOT	15260	44.26	APAAPATDPGMMGY	A1:+28.0313 - Y14:+79.96633	14	14	1	a4.a1.a1	4.6e-12	2	1457.59	1457.58	0.0037	2.53845
a4	a4.a1	pepa4a1a1	40_T4_1a_HCDOT	19448	44.21	APAAPATDPGMMGY	A1:+28.0313 - Y14:+79.96633	14	14	1	a4.a1.a1	1.2e-09	2	1457.59	1457.58	0.005	3.43033
a4	a4.a1	pepa4a1a1	28_T3_1b_HCDOT	19412	44.06	APAAPATDPGMMGY	A1:+28.0313 - Y14:+79.96633	14	14	1	a4.a1.a1	8.5e-09	2	1457.59	1457.58	0.001	0.686067
a4	a4.a1	pepa4a1a1	31_T3_3a_HCDOT	15541	44.21	APAAPATDPGMMGY	A1:+28.0313 - Y14:+79.96633	14	14	1	a4.a1.a1	8.5e-06	2	1457.59	1457.58	0.0045	3.0873
a4	a4.a1	pepa4a1a1	29_T3_2a_HCDOT	15694	44.06	APAAPATDPGMMGY	A1:+28.0313 - Y14:+79.96633	14	14	1	a4.a1.a1	2.3e-06	2	1457.59	1457.58	0.003	2.0582
a4	a4.a1	pepa4a1a1	42_T4_2a_HCDOT	15926	44.16	APAAPATDPGMMGY	A1:+28.0313 - Y14:+79.96633	14	14	1	a4.a1.a1	6.6e-07	2	1457.59	1457.58	0.0044	3.01869
a4	a4.a1	pepa4a1a1	03_T1_2a_HCDOT	18847	44.25	APAAPATDPGMMGY	A1:+28.0313 - Y14:+79.96633	14	14	1	a4.a1.a1	6.4e-12	2	1457.59	1457.58	0.0039	2.67566
a4	a4.a1	pepa4a1a1	43_T4_2b_HCDOT	15778	44.21	APAAPATDPGMMGY	A1:+28.0313 - Y14:+79.96633	14	14	1	a4.a1.a1	4.4e-10	2	1457.59	1457.58	0.0043	2.95009
a4	a4.a1	pepa4a1a1	02_T1_1b_HCDOT	22213	44.35	APAAPATDPGMMGY	A1:+28.0313 - Y14:+79.96633	14	14	1	a4.a1.a1	6.7e-09	2	1457.59	1457.58	0.003	2.0582
a4	a4.a1	pepa4a1a7	04_T1_2b_HCDOT	11619	32.58	APAAPATDPGMMGY	A1:+28.0313 - M11:+15.99491 - M12:+15.99491 - Y14:+79.96633	14	14	1	a4.a1.a1	1.1e-07	2	1489.58	1489.57	0.0036	2.4168
a4	a4.a1	pepa4a1a7	41_T4_1b_HCDOT	12318	32.6	APAAPATDPGMMGY	A1:+28.0313 - M11:+15.99491 - M12:+15.99491 - Y14:+79.96633	14	14	1	a4.a1.a1	7.1e-06	2	1489.58	1489.57	0.0051	3.4238
a4	a4.a1	pepa4a1a7	27_T3_1a_HCDOT	12163	32.58	APAAPATDPGMMGY	A1:+28.0313 - M11:+15.99491 - M12:+15.99491 - Y14:+79.96633	14	14	1	a4.a1.a1	8.2e-07	2	1489.58	1489.57	0.0026	1.74547
a4	a4.a1	pepa4a1a7	40_T4_1a_HCDOT	12062	32.56	APAAPATDPGMMGY	A1:+28.0313 - M11:+15.99491 - M12:+15.99491 - Y14:+79.96633	14	14	1	a4.a1.a1	2.2e-07	2	1489.58	1489.57	0.0018	1.2084
a4	a4.a1	pepa4a1a7	02_T1_1b_HCDOT	14473	32.71	APAAPATDPGMMGY	A1:+28.0313 - M11:+15.99491 - M12:+15.99491 - Y14:+79.96633	14	14	1	a4.a1.a1	8.3e-05	2	1489.58	1489.57	0.003	2.014
a4	a4.a1	pepa4a1a8	15_T2_1b_HCDOT	13563	32.43	APAAPATDPGMMGY	A1:+32.0564 - M11:+15.99491 - M12:+15.99491 - Y14:+79.96633	14	14	1	a4.a1.a1	8.8e-08	2	1493.6	1493.6	0.0023	1.5399
a4	a4.a1	pepa4a1a8	17_T2_2b_HCDOT	11061	32.43	APAAPATDPGMMGY	A1:+32.0564 - M11:+15.99491 - M12:+15.99491 - Y14:+79.96633	14	14	1	a4.a1.a1	4.9e-06	2	1493.6	1493.6	0.0015	1.00429
a4	a4.a1	pepa4a1a8	16_T2_2a_HCDOT	11319	32.3	APAAPATDPGMMGY	A1:+32.0564 - M11:+15.99491 - M12:+15.99491 - Y14:+79.96633	14	14	1	a4.a1.a1	6.1e-05	2	1493.6	1493.6	0.0015	1.00429
a4	a4.a1	pepa4a1a8	14_T2_1a_HCDOT	12964	32.55	APAAPATDPGMMGY	A1:+32.0564 - M11:+15.99491 - M12:+15.99491 - Y14:+79.96633	14	14	1	a4.a1.a1	1.2e-06	2	1493.6	1493.6	0.0029	1.94162
a4	a4.a1	pepa4a1a5	14_T2_1a_HCDOT	16992	38.6	APAAPATDPGMMGY	A1:+32.0564 - M11:+15.99491 - Y14:+79.96633	14	14	1	a4.a1.a1	8.3e-05	2	1477.61	1477.6	0.0038	2.57173
a4	a4.a1	pepa4a1a5	14_T2_1a_HCDOT	16271	37.51	APAAPATDPGMMGY	A1:+32.0564 - M12:+15.99491 - Y14:+79.96633	14	14	1	a4.a1.a1	2e-05	2	1477.61	1477.6	0.0028	1.89496
a4	a4.a1	pepa4a1a5	41_T4_1b_HCDOT	15454	37.65	APAAPATDPGMMGY	A1:+32.0564 - M12:+15.99491 - Y14:+79.96633	14	14	1	a4.a1.a1	0.00041	2	1477.61	1477.6	0.0025	1.69193
a4	a4.a1	pepa4a1a2	17_T2_2b_HCDOT	17457	43.95	APAAPATDPGMMGY	A1:+32.0564 - Y14:+79.96633	14	14	1	a4.a1.a1	1.3e-07	2	1461.61	1461.61	0.0034	2.3262
a4	a4.a1	pepa4a1a2	16_T2_2a_HCDOT	17668	43.9	APAAPATDPGMMGY	A1:+32.0564 - Y14:+79.96633	14	14	1	a4.a1.a1	1e-05	2	1461.61	1461.61	0.0017	1.1631
a4	a4.a1	pepa4a1a2	19_T2_3b_HCDOT	15792	43.98	APAAPATDPGMMGY	A1:+32.0564 - Y14:+79.96633	14	14	1	a4.a1.a1	0.00034	2	1461.61	1461.61	0.0029	1.98411
a4	a4.a1	pepa4a1a2	15_T2_1b_HCDOT	20936	43.96	APAAPATDPGMMGY	A1:+32.0564 - Y14:+79.96633	14	14	1	a4.a1.a1	3.7e-07	2	1461.61	1461.61	0.0034	2.3262
a4	a4.a1	pepa4a1a2	43_T4_2b_HCDOT	15975	44.56	APAAPATDPGMMGY	A1:+32.0564 - Y14:+79.96633	14	14	1	a4.a1.a1	1.3e-07	2	1461.61	1461.61	0.0051	3.4893
a4	a4.a1	pepa4a1a2	41_T4_1b_HCDOT	19629	44.21	APAAPATDPGMMGY	A1:+32.0564 - Y14:+79.96633	14	14	1	a4.a1.a1	3.5e-06	2	1461.62	1461.61	0.0056	3.83139
a4	a4.a1	pepa4a1a2	18_T2_3a_HCDOT	16470	43.98	APAAPATDPGMMGY	A1:+32.0564 - Y14:+79.96633	14	14	1	a4.a1.a1	0.00056	2	1461.61	1461.61	0.0045	3.0788
a4	a4.a1	pepa4a1a2	14_T2_1a_HCDOT	20569	44.1	APAAPATDPGMMGY	A1:+32.0564 - Y14:+79.96633	14	14	1	a4.a1.a1	1e-05	2	1461.61	1461.61	0.0013	0.88943
a4	a4.a1	pepa4a1a4	27_T3_1a_HCDOT	15415	37.65	APAAPATDPGMMGY	A1:+28.0313 - M12:+15.99491 - Y14:+79.96633	14	14	1	a4.a1.a1	6.2e-05	2	1473.58	1473.58	0.004	2.71448
a4	a4.a1	pepa4a1a4	41_T4_1b_HCDOT	15533	37.76	APAAPATDPGMMGY	A1:+28.0313 - M12:+15.99491 - Y14:+79.96633	14	14	1	a4.a1.a1	2.8e-08	2	1473.58	1473.58	0.0052	3.52882
a4	a4.a2	pepa4a2b20	01_T1_1a_HCDOT	11958	30.75	SQLETTTSEFDREK	K14:+36.0756 - S1:+36.0756 - T6:+79.96633	6	1 6	1	a4.a2.a1	7.9e-06	2	1822.91	1822.9	0.0039	2.13944
a4	a4.a2	pepa4a2b20	02_T1_1b_HCDOT	13893	31.85	SQLETTTSEFDREK	K14:+36.0756 - S1:+36.0756 - S1:+79.96633	1	1 6	1	a4.a2.a1	0.00018	2	1822.91	1822.9	0.0016	0.87772
a4	a4.a2	pepa4a2b20	01_T1_1a_HCDOT	12554	31.63	SQLETTTSEFDREK	K14:+36.0756 - S1:+36.0756 - S1:+79.96633	1	1 6	1	a4.a2.a1	4.5e-06	2	1822.91	1822.9	0.0063	3.45602
a4	a4.a2	pepa4a2b18	14_T2_1a_HCDOT	12707	32.16	SQLETTTSEFDREK	K14:+28.0313 - S1:+28.0313 - S8:+79.96633	8	6 7 8	1	a4.a2.a1	0.00061	2	1806.82	1806.82	0.0028	1.54969
a4	a4.a2	pepa4a2b18	02_T1_1b_HCDOT	14383	32.58	SQLETTTSEFDREK	K14:+28.0313 - S1:+28.0313 - S8:+79.96633	8	6 7 8	1	a4.a2.a1	0.00024	2	1806.82	1806.82	0.0065	3.59749
a4	a4.a2	pepa4a2b18	01_T1_1a_HCDOT	12001	30.81	SQLETTTSEFDREK	K14:+28.0313 - S1:+28.0313 - T6:+79.96633	6	6 7 8	1	a4.a2.a1	0.00085	2	1806.82	1806.82	0.0009	0.498114
a4	a4.a2	pepa4a2b27	01_T1_1a_HCDOT	18928	41.06	VNLIKSQLETTTSEFDREK	K5:+36.0756 - K19:+36.0756 - V1:+36.0756 - S6:+79.96633	6	6	1	a4.a2.a1	0.00068	3	2426.35	2426.35	-0.007	-2.88499
a4	a4.a2	pepa4a2b19	14_T2_1a_HCDOT	11632	30.51	SQLETTTSEFDREK	K14:+32.0564 - S1:+32.0564 - T6:+79.96633	6	6	1	a4.a2.a1	3.1e-06	2	1814.87	1814.87	0.0048	2.64482
a4	a4.a2	pepa4a2b19	02_T1_1b_HCDOT	13306	30.96	SQLETTTSEFDREK	K14:+32.0564 - S1:+32.0564 - T6:+79.96633	6	6	1	a4.a2.a1	5.2e-05	2	1814.87	1814.87	0.0046	2.53462
a4	a4.a3	pepa4a3b24	01_T1_1a_HCDOT	32127	60.78	TSRPLLIIADDVAGEALPTLVLNK	K24:+32.0564 - T1:+32.0564 - T1:+79.96633	1	1 2	1	a4.a3.a1	5e-15	3	2663.52	2663.52	0.0011	0.412987
a4	a4.a3	pepa4a3b24	40_T4_1a_HCDOT	30510	60.91	TSRPLLIIADDVAGEALPTLVLNK	K24:+32.0564 - T1:+32.0564 - S2:+79.96633	2	1 2	1	a4.a3.a1	2.1e-13	3	2663.53	2663.52	0.0017	0.638252
a4	a4.a3	pepa4a3b24	28_T3_1b_HCDOT	30431	61.03	TSRPLLIIADDVAGEALPTLVLNK	K24:+32.0564 - T1:+32.0564 - T1:+79.96633	1	1 2	1	a4.a3.a1	1.7e-07	3	2663.54	2663.52	0.012	4.50531
a4	a4.a3	pepa4a3b24	14_T2_1a_HCDOT	31691	60.71	TSRPLLIIADDVAGEALPTLVLNK	K24:+32.0564 - T1:+32.0564 - T1:+79.96633	1	1 2	1	a4.a3.a1	1e-15	3	2663.52	2663.52	0.0004	0.150177
a4	a4.a3	pepa4a3b25	15_T2_1b_HCDOT	32109	60.81	TSRPLLIIADDVAGEALPTLVLNK	K24:+36.0756 - T1:+36.0756 - S2:+79.96633	2	1 2	1	a4.a3.a1	1.5e-12	3	2671.57	2671.56	0.004	1.49725
a4	a4.a3	pepa4a3b25	27_T3_1a_HCDOT	30494	60.78	TSRPLLIIADDVAGEALPTLVLNK	K24:+36.0756 - T1:+36.0756 - T1:+79.96633	1	1 2	1	a4.a3.a1	1.1e-15	3	2671.57	2671.56	0.0036	1.34753
a4	a4.a3	pepa4a3b25	28_T3_1b_HCDOT	30323	60.88	TSRPLLIIADDVAGEALPTLVLNK	K24:+36.0756 - T1:+36.0756 - S2:+79.96633	2	1 2	1	a4.a3.a1	5.8e-08	3	2671.57	2671.56	0.0082	3.06937
a4	a4.a3	pepa4a3b23	40_T4_1a_HCDOT	30532	60.95	TSRPLLIIADDVAGEALPTLVLNK	K24:+28.0313 - T1:+28.0313 - T1:+79.96633	1	1 2	1	a4.a3.a1	0.00054	3	2655.48	2655.47	0.0031	1.1674
a4	a4.a4	pepa4a4b21	02_T1_1b_HCDOT	28556	53.78	TNDIAGDGTTTATVLTQAIVR	T1:+32.0564 - T9:+79.96633	9	9 10 11	1	a4.a4.a1	1.3e-09	3	2230.13	2230.13	-0.0002	-0.089681
a4	a4.a4	pepa4a4b21	01_T1_1a_HCDOT	27410	53.66	TNDIAGDGTTTATVLTQAIVR	T1:+32.0564 - T9:+79.96633	9	9 10 11	1	a4.a4.a1	1.9e-07	3	2230.13	2230.13	0.0025	1.12101
a4	a4.a4	pepa4a4b22	27_T3_1a_HCDOT	25711	53.5	TNDIAGDGTTTATVLTQAIVR	T1:+36.0756 - T11:+79.96633	11	9 10 11	1	a4.a4.a1	1.4e-06	3	2234.15	2234.15	0.0072	3.22271
a4	a4.a5	pepa4a5b10	01_T1_1a_HCDOT	15102	35.4	DATMESLGQASK	K12:+36.0756 - D1:+36.0756 - S6:+79.96633	6	6 11	1	a4.a5.a1	6.4e-14	2	1389.69	1389.69	-0.0027	-1.94288
a4	a4.a5	pepa4a5b10	02_T1_1b_HCDOT	16804	36.2	DATMESLGQASK	K12:+36.0756 - D1:+36.0756 - S11:+79.96633	11	6 11	1	a4.a5.a1	0.00029	2	1389.7	1389.69	0.0068	4.89317
a4	a4.a6	pepa4a6b13	01_T1_1a_HCDOT	16354	37.23	IRGTFNVVAVK	K11:+36.0756 - I1:+36.0756 - T4:+79.96633	4	4	1	a4.a6.a1	4.8e-05	2	1355.84	1355.84	0.0028	2.06514
a4	a4.a6	pepa4a6b12	14_T2_1a_HCDOT	15952	37.03	IRGTFNVVAVK	K11:+32.0564 - I1:+32.0564 - T4:+79.96633	4	4	1	a4.a6.a1	0.00068	3	1347.8	1347.8	0.0009	0.667755
a4	a4.a7	pepa4a7b14	01_T1_1a_HCDOT	17234	38.51	LSGGVAVIK	K9:+32.0564 - L1:+32.0564 - S2:+79.96633	2	2	1	a4.a7.a1	0.00087	2	987.61	987.609	0.0009	0.911291
a4	a4.a7	pepa4a7b15	14_T2_1a_HCDOT	16758	38.25	LSGGVAVIK	K9:+36.0756 - L1:+36.0756 - S2:+79.96633	2	2	1	a4.a7.a1	5.3e-05	2	995.648	995.648	0.0005	0.502186
a4	a4.a8	pepa4a8b11	27_T3_1a_HCDOT	13398	34.48	EAIAQVAAVSSR	E1:+36.0756 - S10:+79.96633	10	10	1	a4.a8.a1	0.00021	2	1317.7	1317.7	0.0031	2.35259
a4	a4.a9	pepa4a9b26	41_T4_1b_HCDOT	16496	39.25	VGNDGVITIEESR	V1:+32.0564 - T8:+79.96633	8	8 12	1	a4.a9.a1	0.00017	2	1500.73	1500.72	0.0038	2.53211
a4	a4.b10	pepa4b10b28	02_T1_1b_HCDOT	20796	42.21	VTVDKDSTVIVEGAGSAEAIANR	K5:+36.0756 - V1:+36.0756 - S7:+79.96633 - T2:+79.96633	2 7	2 7	1	a4.b10.a1	7.3e-07	3	2534.28	2534.27	0.0047	1.85458
a4	a4.b11	pepa4b11b16	15_T2_1b_HCDOT	21182	44.35	QIAYNAGYEGSVIIDK	K16:+32.0564 - Q1:+32.0564 - S11:+79.96633	11	8 11	1	a4.b11.a1	0.00025	2	1884.96	1884.96	0.0021	1.11408
a4	a4.b12	pepa4b12b17	01_T1_1a_HCDOT	31982	60.56	SALQNAASVASLILTTEAVVADKPEQK	K23:+36.0756 - K27:+36.0756 - S1:+36.0756 - S8:+79.96633	8	8 11	1	a4.b12.a1	1.9e-10	3	2942.69	2942.68	0.0031	1.05346
a5	a5.a1	pepa5a1a2	02_T1_1b_HCDOT	25797	49.68	YASLDDSVIPDAENLK	K16:+28.0313 - Y1:+28.0313 - S7:+79.96633	7	1 3 7	1	a5.a1.a1	7.2e-13	2	1885.89	1885.88	0.0036	1.90892
a5	a5.a1	pepa5a1a2	04_T1_2b_HCDOT	21471	49.8	YASLDDSVIPDAENLK	K16:+28.0313 - Y1:+28.0313 - S7:+79.96633	7	1 3 7	1	a5.a1.a1	6.7e-11	2	1885.89	1885.88	0.0045	2.38615
a5	a5.a1	pepa5a1a2	15_T2_1b_HCDOT	24475	49.31	YASLDDSVIPDAENLK	K16:+28.0313 - Y1:+28.0313 - S7:+79.96633	7	1 3 7	1	a5.a1.a1	4.7e-09	2	1885.89	1885.88	0.0073	3.87086
a5	a5.a1	pepa5a1a2	01_T1_1a_HCDOT	24599	49.5	YASLDDSVIPDAENLK	K16:+28.0313 - Y1:+28.0313 - S7:+79.96633	7	1 3 7	1	a5.a1.a1	1.8e-08	3	1885.89	1885.88	0.0041	2.17405
a5	a5.a1	pepa5a1a2	04_T1_2b_HCDOT	21465	49.78	YASLDDSVIPDAENLK	K16:+28.0313 - Y1:+28.0313 - S7:+79.96633	7	1 3 7	1	a5.a1.a1	0.00013	3	1885.89	1885.88	0.0032	1.69682
a5	a5.a1	pepa5a1a2	28_T3_1b_HCDOT	22848	49.4	YASLDDSVIPDAENLK	K16:+28.0313 - Y1:+28.0313 - S7:+79.96633	7	1 3 7	1	a5.a1.a1	6.9e-08	2	1885.89	1885.88	0.0028	1.48472
a5	a5.a1	pepa5a1a2	40_T4_1a_HCDOT	22936	49.51	YASLDDSVIPDAENLK	K16:+28.0313 - Y1:+28.0313 - S7:+79.96633	7	1 3 7	1	a5.a1.a1	4.7e-11	3	1885.89	1885.88	0.005	2.65128
a5	a5.a1	pepa5a1a2	40_T4_1a_HCDOT	22926	49.5	YASLDDSVIPDAENLK	K16:+28.0313 - Y1:+28.0313 - S7:+79.96633	7	1 3 7	1	a5.a1.a1	2.5e-11	2	1885.89	1885.88	0.0047	2.4922
a5	a5.a1	pepa5a1a2	01_T1_1a_HCDOT	24621	49.53	YASLDDSVIPDAENLK	K16:+28.0313 - Y1:+28.0313 - S7:+79.96633	7	1 3 7	1	a5.a1.a1	2.4e-12	2	1885.89	1885.88	0.0057	3.02246
a5	a5.a1	pepa5a1a2	15_T2_1b_HCDOT	24508	49.36	YASLDDSVIPDAENLK	K16:+28.0313 - Y1:+28.0313 - S7:+79.96633	7	1 3 7	1	a5.a1.a1	5e-10	3	1885.89	1885.88	0.0034	1.80287
a5	a5.a1	pepa5a1a2	14_T2_1a_HCDOT	24016	49.25	YASLDDSVIPDAENLK	K16:+28.0313 - Y1:+28.0313 - S7:+79.96633	7	1 3 7	1	a5.a1.a1	4.9e-11	3	1885.88	1885.88	0.0005	0.265128
a5	a5.a1	pepa5a1a2	02_T1_1b_HCDOT	25798	49.68	YASLDDSVIPDAENLK	K16:+28.0313 - Y1:+28.0313 - S7:+79.96633	7	1 3 7	1	a5.a1.a1	1.6e-12	3	1885.89	1885.88	0.003	1.59077
a5	a5.a1	pepa5a1a2	43_T4_2b_HCDOT	18810	49.65	YASLDDSVIPDAENLK	K16:+28.0313 - Y1:+28.0313 - S7:+79.96633	7	1 3 7	1	a5.a1.a1	5.4e-06	2	1885.89	1885.88	0.0023	1.21959
a5	a5.a1	pepa5a1a2	03_T1_2a_HCDOT	22100	49.7	YASLDDSVIPDAENLK	K16:+28.0313 - Y1:+28.0313 - S7:+79.96633	7	1 3 7	1	a5.a1.a1	2.6e-05	3	1885.88	1885.88	0.0006	0.318153
a5	a5.a1	pepa5a1a2	15_T2_1b_HCDOT	24447	49.28	YASLDDSVIPDAENLK	K16:+28.0313 - Y1:+28.0313 - S7:+79.96633	7	1 3 7	1	a5.a1.a1	3.3e-11	2	1885.89	1885.88	0.0035	1.85589
a5	a5.a1	pepa5a1a2	14_T2_1a_HCDOT	24008	49.23	YASLDDSVIPDAENLK	K16:+28.0313 - Y1:+28.0313 - S7:+79.96633	7	1 3 7	1	a5.a1.a1	7.8e-12	2	1885.89	1885.88	0.005	2.65128
a5	a5.a1	pepa5a1a2	27_T3_1a_HCDOT	22977	49.36	YASLDDSVIPDAENLK	K16:+28.0313 - Y1:+28.0313 - S7:+79.96633	7	1 3 7	1	a5.a1.a1	1.9e-10	2	1885.88	1885.88	0.0013	0.689332
a5	a5.a1	pepa5a1a2	14_T2_1a_HCDOT	24568	50.06	YASLDDSVIPDAENLK	K16:+28.0313 - Y1:+28.0313 - S3:+79.96633	3	1 3 7	1	a5.a1.a1	3.6e-08	2	1885.89	1885.88	0.0025	1.32564
a5	a5.a1	pepa5a1a2	27_T3_1a_HCDOT	22983	49.38	YASLDDSVIPDAENLK	K16:+28.0313 - Y1:+28.0313 - S7:+79.96633	7	1 3 7	1	a5.a1.a1	2.6e-07	3	1885.89	1885.88	0.0048	2.54523
a5	a5.a1	pepa5a1a2	28_T3_1b_HCDOT	23384	50.23	YASLDDSVIPDAENLK	K16:+28.0313 - Y1:+28.0313 - S3:+79.96633	3	1 3 7	1	a5.a1.a1	1.3e-07	2	1885.89	1885.88	0.0018	0.95446
a5	a5.a1	pepa5a1a2	41_T4_1b_HCDOT	23720	50.48	YASLDDSVIPDAENLK	K16:+28.0313 - Y1:+28.0313 - S3:+79.96633	3	1 3 7	1	a5.a1.a1	0.00012	2	1885.89	1885.88	0.0018	0.95446
a5	a5.a1	pepa5a1a2	28_T3_1b_HCDOT	22871	49.43	YASLDDSVIPDAENLK	K16:+28.0313 - Y1:+28.0313 - S7:+79.96633	7	1 3 7	1	a5.a1.a1	7e-08	3	1885.89	1885.88	0.0021	1.11354
a5	a5.a1	pepa5a1a2	41_T4_1b_HCDOT	23132	49.6	YASLDDSVIPDAENLK	K16:+28.0313 - Y1:+28.0313 - S7:+79.96633	7	1 3 7	1	a5.a1.a1	3.1e-13	2	1885.89	1885.88	0.005	2.65128
a5	a5.a1	pepa5a1a2	03_T1_2a_HCDOT	22108	49.7	YASLDDSVIPDAENLK	K16:+28.0313 - Y1:+28.0313 - S7:+79.96633	7	1 3 7	1	a5.a1.a1	2.1e-09	2	1885.89	1885.88	0.006	3.18153
a5	a5.a1	pepa5a1a2	42_T4_2a_HCDOT	19100	49.73	YASLDDSVIPDAENLK	K16:+28.0313 - Y1:+28.0313 - S7:+79.96633	7	1 3 7	1	a5.a1.a1	6.7e-13	2	1885.89	1885.88	0.0023	1.21959
a5	a5.a1	pepa5a1a2	15_T2_1b_HCDOT	25030	50.15	YASLDDSVIPDAENLK	K16:+28.0313 - Y1:+28.0313 - S3:+79.96633	3	1 3 7	1	a5.a1.a1	0.00013	2	1885.89	1885.88	0.0019	1.00749
a5	a5.a1	pepa5a1a2	40_T4_1a_HCDOT	23471	50.33	YASLDDSVIPDAENLK	K16:+28.0313 - Y1:+28.0313 - S3:+79.96633	3	1 3 7	1	a5.a1.a1	1.6e-06	2	1885.89	1885.88	0.0084	4.45415
a5	a5.a1	pepa5a1a2	41_T4_1b_HCDOT	23140	49.6	YASLDDSVIPDAENLK	K16:+28.0313 - Y1:+28.0313 - S7:+79.96633	7	1 3 7	1	a5.a1.a1	2.7e-09	3	1885.89	1885.88	0.0048	2.54523
a5	a5.a1	pepa5a1a4	17_T2_2b_HCDOT	20467	49.28	YASLDDSVIPDAENLK	K16:+36.0756 - Y1:+36.0756 - S7:+79.96633	7	3 7	1	a5.a1.a1	1.2e-07	2	1901.98	1901.97	0.0038	1.99793
a5	a5.a1	pepa5a1a4	42_T4_2a_HCDOT	19070	49.68	YASLDDSVIPDAENLK	K16:+36.0756 - Y1:+36.0756 - S7:+79.96633	7	3 7	1	a5.a1.a1	2.3e-14	2	1901.98	1901.97	0.004	2.10308
a5	a5.a1	pepa5a1a4	14_T2_1a_HCDOT	24032	49.28	YASLDDSVIPDAENLK	K16:+36.0756 - Y1:+36.0756 - S7:+79.96633	7	3 7	1	a5.a1.a1	1.3e-10	2	1901.97	1901.97	0.0018	0.946386
a5	a5.a1	pepa5a1a4	30_T3_2b_HCDOT	18534	49.48	YASLDDSVIPDAENLK	K16:+36.0756 - Y1:+36.0756 - S7:+79.96633	7	3 7	1	a5.a1.a1	3.1e-07	2	1901.97	1901.97	0.0027	1.41958
a5	a5.a1	pepa5a1a4	27_T3_1a_HCDOT	22994	49.4	YASLDDSVIPDAENLK	K16:+36.0756 - Y1:+36.0756 - S7:+79.96633	7	3 7	1	a5.a1.a1	1e-09	2	1901.98	1901.97	0.0032	1.68246
a5	a5.a1	pepa5a1a4	28_T3_1b_HCDOT	22857	49.41	YASLDDSVIPDAENLK	K16:+36.0756 - Y1:+36.0756 - S7:+79.96633	7	3 7	1	a5.a1.a1	1.4e-09	2	1901.97	1901.97	0.002	1.05154
a5	a5.a1	pepa5a1a4	04_T1_2b_HCDOT	21476	49.8	YASLDDSVIPDAENLK	K16:+36.0756 - Y1:+36.0756 - S7:+79.96633	7	3 7	1	a5.a1.a1	3.7e-07	2	1901.98	1901.97	0.0051	2.68143
a5	a5.a1	pepa5a1a4	02_T1_1b_HCDOT	26402	50.6	YASLDDSVIPDAENLK	K16:+36.0756 - Y1:+36.0756 - S3:+79.96633	3	3 7	1	a5.a1.a1	4e-07	2	1901.98	1901.97	0.0051	2.68143
a5	a5.a1	pepa5a1a4	27_T3_1a_HCDOT	23509	50.18	YASLDDSVIPDAENLK	K16:+36.0756 - Y1:+36.0756 - S3:+79.96633	3	3 7	1	a5.a1.a1	1.2e-14	2	1901.97	1901.97	0.0029	1.52473
a5	a5.a1	pepa5a1a4	14_T2_1a_HCDOT	24051	49.3	YASLDDSVIPDAENLK	K16:+36.0756 - Y1:+36.0756 - S7:+79.96633	7	3 7	1	a5.a1.a1	5.6e-07	3	1901.97	1901.97	0	0
a5	a5.a1	pepa5a1a4	01_T1_1a_HCDOT	24619	49.51	YASLDDSVIPDAENLK	K16:+36.0756 - Y1:+36.0756 - S7:+79.96633	7	3 7	1	a5.a1.a1	3.1e-08	3	1901.97	1901.97	0.0015	0.788655
a5	a5.a1	pepa5a1a4	01_T1_1a_HCDOT	25206	50.38	YASLDDSVIPDAENLK	K16:+36.0756 - Y1:+36.0756 - S3:+79.96633	3	3 7	1	a5.a1.a1	1.4e-07	2	1901.97	1901.97	0.0027	1.41958
a5	a5.a1	pepa5a1a4	43_T4_2b_HCDOT	18904	49.81	YASLDDSVIPDAENLK	K16:+36.0756 - Y1:+36.0756 - S7:+79.96633	7	3 7	1	a5.a1.a1	9.4e-06	2	1901.98	1901.97	0.0044	2.31339
a5	a5.a1	pepa5a1a4	01_T1_1a_HCDOT	24665	49.58	YASLDDSVIPDAENLK	K16:+36.0756 - Y1:+36.0756 - S7:+79.96633	7	3 7	1	a5.a1.a1	6.8e-09	2	1901.98	1901.97	0.0052	2.734
a5	a5.a1	pepa5a1a4	16_T2_2a_HCDOT	20731	49.31	YASLDDSVIPDAENLK	K16:+36.0756 - Y1:+36.0756 - S7:+79.96633	7	3 7	1	a5.a1.a1	1.3e-07	2	1901.98	1901.97	0.0044	2.31339
a5	a5.a1	pepa5a1a3	15_T2_1b_HCDOT	24494	49.35	YASLDDSVIPDAENLK	K16:+32.0564 - Y1:+32.0564 - S7:+79.96633	7	1 3 7	1	a5.a1.a1	1.6e-09	2	1893.93	1893.93	0.001	0.528002
a5	a5.a1	pepa5a1a3	41_T4_1b_HCDOT	23136	49.6	YASLDDSVIPDAENLK	K16:+32.0564 - Y1:+32.0564 - S7:+79.96633	7	1 3 7	1	a5.a1.a1	4.9e-08	3	1893.94	1893.93	0.0034	1.79521
a5	a5.a1	pepa5a1a3	02_T1_1b_HCDOT	25858	49.78	YASLDDSVIPDAENLK	K16:+32.0564 - Y1:+32.0564 - S7:+79.96633	7	1 3 7	1	a5.a1.a1	8e-10	2	1893.94	1893.93	0.0028	1.4784
a5	a5.a1	pepa5a1a3	02_T1_1b_HCDOT	25774	49.65	YASLDDSVIPDAENLK	K16:+32.0564 - Y1:+32.0564 - S7:+79.96633	7	1 3 7	1	a5.a1.a1	5e-07	3	1893.94	1893.93	0.0034	1.79521
a5	a5.a1	pepa5a1a3	01_T1_1a_HCDOT	24642	49.55	YASLDDSVIPDAENLK	K16:+32.0564 - Y1:+32.0564 - S7:+79.96633	7	1 3 7	1	a5.a1.a1	1.5e-14	2	1893.94	1893.93	0.0051	2.69281
a5	a5.a1	pepa5a1a3	41_T4_1b_HCDOT	23719	50.48	YASLDDSVIPDAENLK	K16:+32.0564 - Y1:+32.0564 - S3:+79.96633	3	1 3 7	1	a5.a1.a1	1.1e-06	2	1893.94	1893.93	0.0057	3.00961
a5	a5.a1	pepa5a1a3	17_T2_2b_HCDOT	20448	49.25	YASLDDSVIPDAENLK	K16:+32.0564 - Y1:+32.0564 - S7:+79.96633	7	1 3 7	1	a5.a1.a1	3e-05	2	1893.94	1893.93	0.0019	1.0032
a5	a5.a1	pepa5a1a3	27_T3_1a_HCDOT	22996	49.4	YASLDDSVIPDAENLK	K16:+32.0564 - Y1:+32.0564 - S7:+79.96633	7	1 3 7	1	a5.a1.a1	1.5e-05	3	1893.94	1893.93	0.0038	2.00641
a5	a5.a1	pepa5a1a3	16_T2_2a_HCDOT	20704	49.26	YASLDDSVIPDAENLK	K16:+32.0564 - Y1:+32.0564 - S7:+79.96633	7	1 3 7	1	a5.a1.a1	1.3e-06	2	1893.94	1893.93	0.0034	1.79521
a5	a5.a1	pepa5a1a3	03_T1_2a_HCDOT	22112	49.71	YASLDDSVIPDAENLK	K16:+32.0564 - Y1:+32.0564 - S7:+79.96633	7	1 3 7	1	a5.a1.a1	1e-12	2	1893.94	1893.93	0.0042	2.21761
a5	a5.a1	pepa5a1a3	42_T4_2a_HCDOT	19052	49.65	YASLDDSVIPDAENLK	K16:+32.0564 - Y1:+32.0564 - S7:+79.96633	7	1 3 7	1	a5.a1.a1	9.2e-10	2	1893.94	1893.93	0.0018	0.950403
a5	a5.a1	pepa5a1a3	40_T4_1a_HCDOT	22921	49.48	YASLDDSVIPDAENLK	K16:+32.0564 - Y1:+32.0564 - S7:+79.96633	7	1 3 7	1	a5.a1.a1	9.5e-08	3	1893.94	1893.93	0.0038	2.00641
a5	a5.a1	pepa5a1a3	43_T4_2b_HCDOT	18869	49.75	YASLDDSVIPDAENLK	K16:+32.0564 - Y1:+32.0564 - S7:+79.96633	7	1 3 7	1	a5.a1.a1	0.00012	3	1893.94	1893.93	0.0032	1.68961
a5	a5.a1	pepa5a1a3	28_T3_1b_HCDOT	23368	50.21	YASLDDSVIPDAENLK	K16:+32.0564 - Y1:+32.0564 - Y1:+79.96633	1	1 3 7	1	a5.a1.a1	7.4e-08	2	1893.93	1893.93	-0.0003	-0.1584
a5	a5.a1	pepa5a1a3	41_T4_1b_HCDOT	23125	49.58	YASLDDSVIPDAENLK	K16:+32.0564 - Y1:+32.0564 - S7:+79.96633	7	1 3 7	1	a5.a1.a1	2.9e-11	2	1893.94	1893.93	0.0035	1.84801
a5	a5.a1	pepa5a1a3	27_T3_1a_HCDOT	22966	49.35	YASLDDSVIPDAENLK	K16:+32.0564 - Y1:+32.0564 - S7:+79.96633	7	1 3 7	1	a5.a1.a1	8.4e-10	2	1893.94	1893.93	0.0037	1.95361
a5	a5.a1	pepa5a1a3	28_T3_1b_HCDOT	22826	49.36	YASLDDSVIPDAENLK	K16:+32.0564 - Y1:+32.0564 - S7:+79.96633	7	1 3 7	1	a5.a1.a1	3.3e-09	2	1893.94	1893.93	0.0034	1.79521
a5	a5.a1	pepa5a1a3	40_T4_1a_HCDOT	23497	50.38	YASLDDSVIPDAENLK	K16:+32.0564 - Y1:+32.0564 - S3:+79.96633	3	1 3 7	1	a5.a1.a1	6.8e-10	2	1893.94	1893.93	0.0017	0.897603
a5	a5.a1	pepa5a1a3	15_T2_1b_HCDOT	24451	49.28	YASLDDSVIPDAENLK	K16:+32.0564 - Y1:+32.0564 - S7:+79.96633	7	1 3 7	1	a5.a1.a1	8.9e-05	3	1893.94	1893.93	0.0023	1.2144
a5	a5.a1	pepa5a1a3	04_T1_2b_HCDOT	21436	49.75	YASLDDSVIPDAENLK	K16:+32.0564 - Y1:+32.0564 - S7:+79.96633	7	1 3 7	1	a5.a1.a1	1e-15	2	1893.94	1893.93	0.002	1.056
a5	a5.a1	pepa5a1a3	14_T2_1a_HCDOT	24006	49.23	YASLDDSVIPDAENLK	K16:+32.0564 - Y1:+32.0564 - S7:+79.96633	7	1 3 7	1	a5.a1.a1	1e-09	2	1893.94	1893.93	0.0018	0.950403
a5	a5.a1	pepa5a1a3	03_T1_2a_HCDOT	22077	49.65	YASLDDSVIPDAENLK	K16:+32.0564 - Y1:+32.0564 - S7:+79.96633	7	1 3 7	1	a5.a1.a1	0.00013	3	1893.94	1893.93	0.0043	2.27041
a5	a5.a1	pepa5a1a3	14_T2_1a_HCDOT	24013	49.25	YASLDDSVIPDAENLK	K16:+32.0564 - Y1:+32.0564 - S7:+79.96633	7	1 3 7	1	a5.a1.a1	3.5e-07	3	1893.93	1893.93	-0.0006	-0.316801
a5	a5.a1	pepa5a1a3	40_T4_1a_HCDOT	22918	49.48	YASLDDSVIPDAENLK	K16:+32.0564 - Y1:+32.0564 - S7:+79.96633	7	1 3 7	1	a5.a1.a1	1e-15	2	1893.94	1893.93	0.0065	3.43201
a5	a5.a1	pepa5a1a3	43_T4_2b_HCDOT	18782	49.6	YASLDDSVIPDAENLK	K16:+32.0564 - Y1:+32.0564 - S7:+79.96633	7	1 3 7	1	a5.a1.a1	6.6e-05	2	1893.94	1893.93	0.0026	1.3728
a5	a5.a1	pepa5a1a3	04_T1_2b_HCDOT	21425	49.71	YASLDDSVIPDAENLK	K16:+32.0564 - Y1:+32.0564 - S7:+79.96633	7	1 3 7	1	a5.a1.a1	1.8e-05	3	1893.94	1893.93	0.0025	1.32
a5	a5.a1	pepa5a1a5	14_T2_1a_HCDOT	25698	51.75	YASLDDSVIPDAENLKVTLER	K16:+28.0313 - Y1:+28.0313 - S7:+79.96633	7	7	1	a5.a1.a1	8.7e-06	3	2484.23	2484.23	0.0048	1.93219
a5	a5.a1	pepa5a1a7	40_T4_1a_HCDOT	24596	52.01	YASLDDSVIPDAENLKVTLER	K16:+36.0756 - Y1:+36.0756 - S7:+79.96633	7	7	1	a5.a1.a1	4.6e-10	3	2500.32	2500.32	0.006	2.3997
a5	a5.a1	pepa5a1a7	41_T4_1b_HCDOT	24939	52.31	YASLDDSVIPDAENLKVTLER	K16:+36.0756 - Y1:+36.0756 - S7:+79.96633	7	7	1	a5.a1.a1	1.6e-10	3	2500.32	2500.32	0.0077	3.07961
a5	a5.a1	pepa5a1a7	27_T3_1a_HCDOT	24657	51.9	YASLDDSVIPDAENLKVTLER	K16:+36.0756 - Y1:+36.0756 - S7:+79.96633	7	7	1	a5.a1.a1	0.00028	3	2500.32	2500.32	0.0035	1.39982
a5	a5.a1	pepa5a1a6	27_T3_1a_HCDOT	24666	51.91	YASLDDSVIPDAENLKVTLER	K16:+32.0564 - Y1:+32.0564 - S7:+79.96633	7	7	1	a5.a1.a1	8.8e-05	3	2492.28	2492.28	0.0052	2.08644
a5	a5.a2	pepa5a2a1	01_T1_1a_HCDOT	5025	19.98	HYGGLTGK	K8:+36.0756 - H1:+36.0756 - Y2:+79.96633	2	2	1	a5.a2.a1	0.00072	2	984.55	984.549	0.0013	1.3204
a6	a6.a1	pepa6a1b14	15_T2_1b_HCDOT	25899	51.46	TIVFNTNHDILDGTETVISGASCTTNCLAPMAK	C23:+57.02146 - C27:+57.02146 - K33:+32.0564 - T1:+32.0564 - M31:+15.99491 - T24:+79.96633 - T25:+79.96633	24 25	16 19 22 24 25	1	a6.a1.a1	1e-15	3	3791.75	3791.72	0.033	8.70317
a6	a6.a1	pepa6a1b14	14_T2_1a_HCDOT	25301	51.16	TIVFNTNHDILDGTETVISGASCTTNCLAPMAK	C23:+57.02146 - C27:+57.02146 - K33:+32.0564 - T1:+32.0564 - M31:+15.99491 - S19:+79.96633 - S22:+79.96633	19 22	16 19 22 24 25	1	a6.a1.a1	1.6e-11	3	3791.74	3791.72	0.022	5.80211
a6	a6.a1	pepa6a1b14	28_T3_1b_HCDOT	24323	51.66	TIVFNTNHDILDGTETVISGASCTTNCLAPMAK	C23:+57.02146 - C27:+57.02146 - K33:+32.0564 - T1:+32.0564 - M31:+15.99491 - T16:+79.96633 - T25:+79.96633	16 25	16 19 22 24 25	1	a6.a1.a1	3.8e-06	3	3791.75	3791.72	0.025	6.59331
a6	a6.a1	pepa6a1b14	01_T1_1a_HCDOT	25936	51.48	TIVFNTNHDILDGTETVISGASCTTNCLAPMAK	C23:+57.02146 - C27:+57.02146 - K33:+32.0564 - T1:+32.0564 - M31:+15.99491 - T24:+79.96633 - T25:+79.96633	24 25	16 19 22 24 25	1	a6.a1.a1	8.4e-15	3	3791.75	3791.72	0.032	8.43944
a6	a6.a1	pepa6a1b14	40_T4_1a_HCDOT	24429	51.76	TIVFNTNHDILDGTETVISGASCTTNCLAPMAK	C23:+57.02146 - C27:+57.02146 - K33:+32.0564 - T1:+32.0564 - M31:+15.99491 - T24:+79.96633 - T25:+79.96633	24 25	16 19 22 24 25	1	a6.a1.a1	1.1e-09	3	3791.75	3791.72	0.024	6.32958
a6	a6.a1	pepa6a1b14	14_T2_1a_HCDOT	26329	52.68	TIVFNTNHDILDGTETVISGASCTTNCLAPMAK	C23:+57.02146 - C27:+57.02146 - K33:+32.0564 - T1:+32.0564 - M31:+15.99491 - S19:+79.96633 - T24:+79.96633	19 24	16 19 22 24 25	1	a6.a1.a1	2.1e-09	3	3791.75	3791.72	0.033	8.70317
a6	a6.a1	pepa6a1b12	01_T1_1a_HCDOT	26006	51.58	TIVFNTNHDILDGTETVISGASCTTNCLAPMAK	C23:+57.02146 - C27:+57.02146 - K33:+28.0313 - T1:+28.0313 - M31:+15.99491 - S22:+79.96633 - T25:+79.96633	22 25	19 22 24 25	1	a6.a1.a1	6.4e-10	3	3783.7	3783.67	0.028	7.40022
a6	a6.a1	pepa6a1b12	15_T2_1b_HCDOT	25982	51.6	TIVFNTNHDILDGTETVISGASCTTNCLAPMAK	C23:+57.02146 - C27:+57.02146 - K33:+28.0313 - T1:+28.0313 - M31:+15.99491 - T24:+79.96633 - T25:+79.96633	24 25	19 22 24 25	1	a6.a1.a1	2.7e-05	3	3783.7	3783.67	0.032	8.45739
a6	a6.a1	pepa6a1b15	01_T1_1a_HCDOT	26981	53.01	TIVFNTNHDILDGTETVISGASCTTNCLAPMAK	C23:+57.02146 - C27:+57.02146 - K33:+36.0756 - T1:+36.0756 - M31:+15.99491 - S19:+79.96633 - T24:+79.96633	19 24	19 22 24 25	1	a6.a1.a1	3.2e-07	3	3799.78	3799.76	0.016	4.21079
a6	a6.a1	pepa6a1b10	27_T3_1a_HCDOT	24551	51.75	TIVFNTNHDILDGTETVISGASCTTNCLAPMAK	C23:+57.02146 - C27:+57.02146 - K33:+28.0313 - T1:+28.0313 - T24:+79.96633 - T25:+79.96633	24 25	16 19 22 24 25	1	a6.a1.a1	1.9e-09	3	3767.71	3767.68	0.031	8.22788
a6	a6.a1	pepa6a1b10	41_T4_1b_HCDOT	24773	52.08	TIVFNTNHDILDGTETVISGASCTTNCLAPMAK	C23:+57.02146 - C27:+57.02146 - K33:+28.0313 - T1:+28.0313 - S22:+79.96633 - T24:+79.96633	22 24	16 19 22 24 25	1	a6.a1.a1	4.1e-10	3	3767.7	3767.68	0.027	7.16622
a6	a6.a1	pepa6a1b10	15_T2_1b_HCDOT	28346	55.15	TIVFNTNHDILDGTETVISGASCTTNCLAPMAK	C23:+57.02146 - C27:+57.02146 - K33:+28.0313 - T1:+28.0313 - S19:+79.96633 - T25:+79.96633	19 25	16 19 22 24 25	1	a6.a1.a1	3.1e-12	3	3767.68	3767.68	0.0009	0.238874
a6	a6.a1	pepa6a1b10	04_T1_2b_HCDOT	25035	55.6	TIVFNTNHDILDGTETVISGASCTTNCLAPMAK	C23:+57.02146 - C27:+57.02146 - K33:+28.0313 - T1:+28.0313 - S22:+79.96633 - T25:+79.96633	22 25	16 19 22 24 25	1	a6.a1.a1	1.9e-12	3	3767.69	3767.68	0.009	2.38874
a6	a6.a1	pepa6a1b10	40_T4_1a_HCDOT	24499	51.86	TIVFNTNHDILDGTETVISGASCTTNCLAPMAK	C23:+57.02146 - C27:+57.02146 - K33:+28.0313 - T1:+28.0313 - S19:+79.96633 - T24:+79.96633	19 24	16 19 22 24 25	1	a6.a1.a1	1e-15	3	3767.71	3767.68	0.031	8.22788
a6	a6.a1	pepa6a1b10	01_T1_1a_HCDOT	28403	55.18	TIVFNTNHDILDGTETVISGASCTTNCLAPMAK	C23:+57.02146 - C27:+57.02146 - K33:+28.0313 - T1:+28.0313 - T24:+79.96633 - T25:+79.96633	24 25	16 19 22 24 25	1	a6.a1.a1	1.1e-10	3	3767.69	3767.68	0.018	4.77748
a6	a6.a1	pepa6a1b10	40_T4_1a_HCDOT	26762	55.28	TIVFNTNHDILDGTETVISGASCTTNCLAPMAK	C23:+57.02146 - C27:+57.02146 - K33:+28.0313 - T1:+28.0313 - S19:+79.96633 - T25:+79.96633	19 25	16 19 22 24 25	1	a6.a1.a1	2.1e-13	3	3767.68	3767.68	0.0068	1.80483
a6	a6.a1	pepa6a1b10	14_T2_1a_HCDOT	28339	55.68	TIVFNTNHDILDGTETVISGASCTTNCLAPMAK	C23:+57.02146 - C27:+57.02146 - K33:+28.0313 - T1:+28.0313 - S22:+79.96633 - T25:+79.96633	22 25	16 19 22 24 25	1	a6.a1.a1	5.8e-06	3	3767.7	3767.68	0.021	5.57373
a6	a6.a1	pepa6a1b10	02_T1_1b_HCDOT	28697	53.98	TIVFNTNHDILDGTETVISGASCTTNCLAPMAK	C23:+57.02146 - C27:+57.02146 - K33:+28.0313 - T1:+28.0313 - S22:+79.96633 - T16:+79.96633	16 22	16 19 22 24 25	1	a6.a1.a1	7.2e-08	3	3767.7	3767.68	0.023	6.10456
a6	a6.a1	pepa6a1b11	02_T1_1b_HCDOT	27416	52.1	TIVFNTNHDILDGTETVISGASCTTNCLAPMAK	C23:+57.02146 - C27:+57.02146 - K33:+32.0564 - T1:+32.0564 - S19:+79.96633 - S22:+79.96633	19 22	14 16 19 22 24 25	1	a6.a1.a1	1.4e-06	3	3775.76	3775.73	0.03	7.94549
a6	a6.a1	pepa6a1b11	03_T1_2a_HCDOT	25822	55.63	TIVFNTNHDILDGTETVISGASCTTNCLAPMAK	C23:+57.02146 - C27:+57.02146 - K33:+32.0564 - T1:+32.0564 - T14:+79.96633 - T16:+79.96633	14 16	14 16 19 22 24 25	1	a6.a1.a1	0.00024	3	3775.74	3775.73	0.015	3.97274
a6	a6.a1	pepa6a1b11	15_T2_1b_HCDOT	27363	53.66	TIVFNTNHDILDGTETVISGASCTTNCLAPMAK	C23:+57.02146 - C27:+57.02146 - K33:+32.0564 - T1:+32.0564 - S19:+79.96633 - S22:+79.96633	19 22	14 16 19 22 24 25	1	a6.a1.a1	6.2e-11	3	3775.75	3775.73	0.022	5.82669
a6	a6.a1	pepa6a1b11	40_T4_1a_HCDOT	26726	55.21	TIVFNTNHDILDGTETVISGASCTTNCLAPMAK	C23:+57.02146 - C27:+57.02146 - K33:+32.0564 - T1:+32.0564 - S19:+79.96633 - S22:+79.96633	19 22	14 16 19 22 24 25	1	a6.a1.a1	1e-15	3	3775.74	3775.73	0.01	2.6485
a6	a6.a1	pepa6a1b11	40_T4_1a_HCDOT	24957	52.55	TIVFNTNHDILDGTETVISGASCTTNCLAPMAK	C23:+57.02146 - C27:+57.02146 - K33:+32.0564 - T1:+32.0564 - S19:+79.96633 - S22:+79.96633	19 22	14 16 19 22 24 25	1	a6.a1.a1	6.5e-08	3	3775.76	3775.73	0.029	7.68064
a6	a6.a1	pepa6a1b11	41_T4_1b_HCDOT	27880	56.8	TIVFNTNHDILDGTETVISGASCTTNCLAPMAK	C23:+57.02146 - C27:+57.02146 - K33:+32.0564 - T1:+32.0564 - T14:+79.96633 - T24:+79.96633	14 24	14 16 19 22 24 25	1	a6.a1.a1	0.00013	3	3775.75	3775.73	0.023	6.09154
a6	a6.a1	pepa6a1b11	16_T2_2a_HCDOT	24123	55.13	TIVFNTNHDILDGTETVISGASCTTNCLAPMAK	C23:+57.02146 - C27:+57.02146 - K33:+32.0564 - T1:+32.0564 - T14:+79.96633 - T16:+79.96633	14 16	14 16 19 22 24 25	1	a6.a1.a1	0.00074	3	3775.74	3775.73	0.015	3.97274
a6	a6.a1	pepa6a1b11	27_T3_1a_HCDOT	27215	55.8	TIVFNTNHDILDGTETVISGASCTTNCLAPMAK	C23:+57.02146 - C27:+57.02146 - K33:+32.0564 - T1:+32.0564 - S19:+79.96633 - T24:+79.96633	19 24	14 16 19 22 24 25	1	a6.a1.a1	1e-11	3	3775.73	3775.73	-0.0011	-0.291335
a6	a6.a1	pepa6a1b11	14_T2_1a_HCDOT	27868	54.98	TIVFNTNHDILDGTETVISGASCTTNCLAPMAK	C23:+57.02146 - C27:+57.02146 - K33:+32.0564 - T1:+32.0564 - T24:+79.96633 - T25:+79.96633	24 25	14 16 19 22 24 25	1	a6.a1.a1	1e-15	3	3775.73	3775.73	0.0059	1.56261
a6	a6.a1	pepa6a1b11	28_T3_1b_HCDOT	26630	55.2	TIVFNTNHDILDGTETVISGASCTTNCLAPMAK	C23:+57.02146 - C27:+57.02146 - K33:+32.0564 - T1:+32.0564 - S19:+79.96633 - T25:+79.96633	19 25	14 16 19 22 24 25	1	a6.a1.a1	4.2e-15	3	3775.75	3775.73	0.027	7.15094
a6	a6.a1	pepa6a1b11	41_T4_1b_HCDOT	25249	52.78	TIVFNTNHDILDGTETVISGASCTTNCLAPMAK	C23:+57.02146 - C27:+57.02146 - K33:+32.0564 - T1:+32.0564 - T24:+79.96633 - T25:+79.96633	24 25	14 16 19 22 24 25	1	a6.a1.a1	2.5e-09	3	3775.75	3775.73	0.021	5.56184
a6	a6.a1	pepa6a1b11	14_T2_1a_HCDOT	28356	55.7	TIVFNTNHDILDGTETVISGASCTTNCLAPMAK	C23:+57.02146 - C27:+57.02146 - K33:+32.0564 - T1:+32.0564 - S22:+79.96633 - T25:+79.96633	22 25	14 16 19 22 24 25	1	a6.a1.a1	7.7e-13	3	3775.74	3775.73	0.015	3.97274
a6	a6.a1	pepa6a1b11	28_T3_1b_HCDOT	25693	53.75	TIVFNTNHDILDGTETVISGASCTTNCLAPMAK	C23:+57.02146 - C27:+57.02146 - K33:+32.0564 - T1:+32.0564 - S22:+79.96633 - T25:+79.96633	22 25	14 16 19 22 24 25	1	a6.a1.a1	3.7e-08	3	3775.74	3775.73	0.013	3.44305
a6	a6.a1	pepa6a1b11	41_T4_1b_HCDOT	26053	54	TIVFNTNHDILDGTETVISGASCTTNCLAPMAK	C23:+57.02146 - C27:+57.02146 - K33:+32.0564 - T1:+32.0564 - S19:+79.96633 - T25:+79.96633	19 25	14 16 19 22 24 25	1	a6.a1.a1	1.1e-11	3	3775.76	3775.73	0.03	7.94549
a6	a6.a1	pepa6a1b11	27_T3_1a_HCDOT	26733	55.06	TIVFNTNHDILDGTETVISGASCTTNCLAPMAK	C23:+57.02146 - C27:+57.02146 - K33:+32.0564 - T1:+32.0564 - S19:+79.96633 - T25:+79.96633	19 25	14 16 19 22 24 25	1	a6.a1.a1	1e-15	3	3775.74	3775.73	0.0081	2.14528
a6	a6.a1	pepa6a1b13	15_T2_1b_HCDOT	26632	52.58	TIVFNTNHDILDGTETVISGASCTTNCLAPMAK	C23:+57.02146 - C27:+57.02146 - K33:+36.0756 - T1:+36.0756 - S19:+79.96633 - T24:+79.96633	19 24	14 16 19 22 24 25	1	a6.a1.a1	1.4e-06	3	3783.79	3783.77	0.021	5.55003
a6	a6.a1	pepa6a1b13	14_T2_1a_HCDOT	25640	51.66	TIVFNTNHDILDGTETVISGASCTTNCLAPMAK	C23:+57.02146 - C27:+57.02146 - K33:+36.0756 - T1:+36.0756 - S22:+79.96633 - T25:+79.96633	22 25	14 16 19 22 24 25	1	a6.a1.a1	1.3e-07	3	3783.79	3783.77	0.021	5.55003
a6	a6.a1	pepa6a1b13	15_T2_1b_HCDOT	30218	57.96	TIVFNTNHDILDGTETVISGASCTTNCLAPMAK	C23:+57.02146 - C27:+57.02146 - K33:+36.0756 - T1:+36.0756 - S19:+79.96633 - T24:+79.96633	19 24	14 16 19 22 24 25	1	a6.a1.a1	2.6e-06	3	3783.79	3783.77	0.027	7.13575
a6	a6.a1	pepa6a1a7	42_T4_2a_HCDOT	24326	58.58	TIVFNTNHDILDGTETVISGASCTTNCLAPMAK	C23:+57.02146 - C27:+57.02146 - K33:+28.0313 - T1:+28.0313 - M31:+15.99491 - T24:+79.96633	24	19 22 24 25	1	a6.a1.a1	5e-05	3	3703.7	3703.71	-0.0065	-1.755
a6	a6.a1	pepa6a1a7	15_T2_1b_HCDOT	30265	58.03	TIVFNTNHDILDGTETVISGASCTTNCLAPMAK	C23:+57.02146 - C27:+57.02146 - K33:+28.0313 - T1:+28.0313 - M31:+15.99491 - S22:+79.96633	22	19 22 24 25	1	a6.a1.a1	1.8e-12	3	3703.69	3703.71	-0.012	-3.24
a6	a6.a1	pepa6a1a9	27_T3_1a_HCDOT	28597	57.88	TIVFNTNHDILDGTETVISGASCTTNCLAPMAK	C23:+57.02146 - C27:+57.02146 - K33:+32.0564 - T1:+32.0564 - M31:+15.99491 - T25:+79.96633	25	19 22 24 25	1	a6.a1.a1	6.1e-14	3	3711.75	3711.76	-0.01	-2.69414
a6	a6.a1	pepa6a1a9	41_T4_1b_HCDOT	29034	58.53	TIVFNTNHDILDGTETVISGASCTTNCLAPMAK	C23:+57.02146 - C27:+57.02146 - K33:+32.0564 - T1:+32.0564 - M31:+15.99491 - S19:+79.96633	19	19 22 24 25	1	a6.a1.a1	9.6e-13	3	3711.75	3711.76	-0.0041	-1.1046
a6	a6.a1	pepa6a1a9	28_T3_1b_HCDOT	28524	58.1	TIVFNTNHDILDGTETVISGASCTTNCLAPMAK	C23:+57.02146 - C27:+57.02146 - K33:+32.0564 - T1:+32.0564 - M31:+15.99491 - S22:+79.96633	22	19 22 24 25	1	a6.a1.a1	2.2e-08	3	3711.74	3711.76	-0.014	-3.7718
a6	a6.a1	pepa6a1a8	40_T4_1a_HCDOT	26561	54.96	TIVFNTNHDILDGTETVISGASCTTNCLAPMAK	C23:+57.02146 - C27:+57.02146 - K33:+36.0756 - T1:+36.0756 - T24:+79.96633	24	22 24 25	1	a6.a1.a1	6.7e-09	3	3703.82	3703.8	0.017	4.58988
a6	a6.a2	pepa6a2a6	14_T2_1a_HCDOT	12097	31.23	AGAANIVPNSTGAAK	K15:+36.0756 - A1:+36.0756 - S10:+79.96633	10	10	1	a6.a2.a1	3.6e-10	2	1493.83	1493.83	0.0037	2.47685
a6	a6.a2	pepa6a2a6	01_T1_1a_HCDOT	12396	31.4	AGAANIVPNSTGAAK	K15:+36.0756 - A1:+36.0756 - S10:+79.96633	10	10	1	a6.a2.a1	1e-08	2	1493.83	1493.83	0.0007	0.468594
a6	a6.a2	pepa6a2a6	40_T4_1a_HCDOT	11338	31.36	AGAANIVPNSTGAAK	K15:+36.0756 - A1:+36.0756 - S10:+79.96633	10	10	1	a6.a2.a1	3.5e-08	2	1493.83	1493.83	0.0025	1.67355
a6	a6.a2	pepa6a2a6	15_T2_1b_HCDOT	12852	31.26	AGAANIVPNSTGAAK	K15:+36.0756 - A1:+36.0756 - S10:+79.96633	10	10	1	a6.a2.a1	1.4e-07	2	1493.83	1493.83	0.0013	0.870246
a6	a6.a2	pepa6a2a6	27_T3_1a_HCDOT	11486	31.5	AGAANIVPNSTGAAK	K15:+36.0756 - A1:+36.0756 - S10:+79.96633	10	10	1	a6.a2.a1	3.2e-07	2	1493.83	1493.83	0.0017	1.13801
a6	a6.a2	pepa6a2a6	02_T1_1b_HCDOT	13679	31.53	AGAANIVPNSTGAAK	K15:+36.0756 - A1:+36.0756 - S10:+79.96633	10	10	1	a6.a2.a1	4.5e-06	2	1493.83	1493.83	0.004	2.67768
a6	a6.a2	pepa6a2a6	28_T3_1b_HCDOT	11579	31.48	AGAANIVPNSTGAAK	K15:+36.0756 - A1:+36.0756 - S10:+79.96633	10	10	1	a6.a2.a1	8.3e-07	2	1493.83	1493.83	0.001	0.66942
a6	a6.a2	pepa6a2a5	40_T4_1a_HCDOT	11337	31.36	AGAANIVPNSTGAAK	K15:+32.0564 - A1:+32.0564 - S10:+79.96633	10	10	1	a6.a2.a1	5.4e-09	2	1485.79	1485.79	0.0026	1.74991
a6	a6.a2	pepa6a2a5	02_T1_1b_HCDOT	13728	31.6	AGAANIVPNSTGAAK	K15:+32.0564 - A1:+32.0564 - S10:+79.96633	10	10	1	a6.a2.a1	1.1e-12	2	1485.79	1485.79	0.0028	1.88452
a6	a6.a2	pepa6a2a5	27_T3_1a_HCDOT	11538	31.58	AGAANIVPNSTGAAK	K15:+32.0564 - A1:+32.0564 - S10:+79.96633	10	10	1	a6.a2.a1	6.2e-10	2	1485.79	1485.79	0.0017	1.14417
a6	a6.a2	pepa6a2a5	15_T2_1b_HCDOT	12927	31.4	AGAANIVPNSTGAAK	K15:+32.0564 - A1:+32.0564 - S10:+79.96633	10	10	1	a6.a2.a1	2.8e-09	2	1485.79	1485.79	0.0011	0.740346
a6	a6.a2	pepa6a2a5	01_T1_1a_HCDOT	12437	31.46	AGAANIVPNSTGAAK	K15:+32.0564 - A1:+32.0564 - S10:+79.96633	10	10	1	a6.a2.a1	2.5e-07	2	1485.8	1485.79	0.0037	2.49025
a6	a6.a2	pepa6a2a5	14_T2_1a_HCDOT	12134	31.28	AGAANIVPNSTGAAK	K15:+32.0564 - A1:+32.0564 - S10:+79.96633	10	10	1	a6.a2.a1	2.1e-10	2	1485.79	1485.79	0.0012	0.80765
a6	a6.a2	pepa6a2a5	41_T4_1b_HCDOT	11777	31.66	AGAANIVPNSTGAAK	K15:+32.0564 - A1:+32.0564 - S10:+79.96633	10	10	1	a6.a2.a1	2.9e-09	2	1485.79	1485.79	0.0026	1.74991
a6	a6.a2	pepa6a2a4	14_T2_1a_HCDOT	12164	31.33	AGAANIVPNSTGAAK	K15:+28.0313 - A1:+28.0313 - S10:+79.96633	10	10	1	a6.a2.a1	2.7e-12	2	1477.74	1477.74	0.0005	0.338354
a6	a6.a2	pepa6a2a4	02_T1_1b_HCDOT	13734	31.61	AGAANIVPNSTGAAK	K15:+28.0313 - A1:+28.0313 - S10:+79.96633	10	10	1	a6.a2.a1	3.9e-07	2	1477.74	1477.74	0.0035	2.36848
a6	a6.a2	pepa6a2a4	15_T2_1b_HCDOT	12994	31.51	AGAANIVPNSTGAAK	K15:+28.0313 - A1:+28.0313 - S10:+79.96633	10	10	1	a6.a2.a1	2.5e-07	2	1477.74	1477.74	0.0009	0.609038
a6	a6.a2	pepa6a2a4	27_T3_1a_HCDOT	11586	31.66	AGAANIVPNSTGAAK	K15:+28.0313 - A1:+28.0313 - S10:+79.96633	10	10	1	a6.a2.a1	3.1e-08	2	1477.74	1477.74	0.0018	1.21808
a6	a6.a2	pepa6a2a4	01_T1_1a_HCDOT	12456	31.48	AGAANIVPNSTGAAK	K15:+28.0313 - A1:+28.0313 - S10:+79.96633	10	10	1	a6.a2.a1	2.3e-09	2	1477.74	1477.74	0.003	2.03013
a6	a6.a3	pepa6a3a2	28_T3_1b_HCDOT	30630	61.33	AATNESYGYTEDPIVSSDIVGMSYGSLFDATQTK	K34:+36.0756 - A1:+36.0756 - S6:+79.96633	6	3 6 7 9 16 17 23	1	a6.a3.a1	7.1e-05	3	3769.75	3769.77	-0.011	-2.91795
a6	a6.a3	pepa6a3a2	01_T1_1a_HCDOT	31986	60.58	AATNESYGYTEDPIVSSDIVGMSYGSLFDATQTK	K34:+36.0756 - A1:+36.0756 - S16:+79.96633	16	3 6 7 9 16 17 23	1	a6.a3.a1	1e-15	3	3769.78	3769.77	0.016	4.2443
a6	a6.a3	pepa6a3a2	01_T1_1a_HCDOT	32076	60.7	AATNESYGYTEDPIVSSDIVGMSYGSLFDATQTK	K34:+36.0756 - A1:+36.0756 - S16:+79.96633	16	3 6 7 9 16 17 23	1	a6.a3.a1	1e-15	3	3769.74	3769.77	-0.029	-7.69278
a6	a6.a3	pepa6a3a2	27_T3_1a_HCDOT	30884	61.35	AATNESYGYTEDPIVSSDIVGMSYGSLFDATQTK	K34:+36.0756 - A1:+36.0756 - S6:+79.96633	6	3 6 7 9 16 17 23	1	a6.a3.a1	1.7e-06	3	3769.77	3769.77	0.0076	2.01604
a6	a6.a3	pepa6a3a3	02_T1_1b_HCDOT	33137	60.75	AATNESYGYTEDPIVSSDIVGMSYGSLFDATQTK	K34:+36.0756 - A1:+36.0756 - M22:+15.99491 - Y24:+79.96633	24	16 17 23 24	1	a6.a3.a1	0.00036	3	3785.77	3785.76	0.012	3.16977
a6	a6.a3	pepa6a3a1	41_T4_1b_HCDOT	31057	61.56	AATNESYGYTEDPIVSSDIVGMSYGSLFDATQTK	K34:+32.0564 - A1:+32.0564 - Y9:+79.96633	9	3 6 7 9 16 17 23 24	1	a6.a3.a1	0.00066	3	3761.74	3761.73	0.011	2.92419
a6	a6.a3	pepa6a3a1	15_T2_1b_HCDOT	32510	61.41	AATNESYGYTEDPIVSSDIVGMSYGSLFDATQTK	K34:+32.0564 - A1:+32.0564 - T3:+79.96633	3	3 6 7 9 16 17 23 24	1	a6.a3.a1	2.6e-15	3	3761.73	3761.73	0.0007	0.186085
a6	a6.a3	pepa6a3a1	15_T2_1b_HCDOT	32086	60.78	AATNESYGYTEDPIVSSDIVGMSYGSLFDATQTK	K34:+32.0564 - A1:+32.0564 - S16:+79.96633	16	3 6 7 9 16 17 23 24	1	a6.a3.a1	3.8e-10	3	3761.76	3761.73	0.033	8.77257
a6	a6.a3	pepa6a3a1	15_T2_1b_HCDOT	31941	60.56	AATNESYGYTEDPIVSSDIVGMSYGSLFDATQTK	K34:+32.0564 - A1:+32.0564 - S17:+79.96633	17	3 6 7 9 16 17 23 24	1	a6.a3.a1	1e-15	3	3761.74	3761.73	0.014	3.72169
a7	a7.a1	pepa7a1a1	01_T1_1a_HCDOT	11836	30.56	VDSVSSVGPEK	K11:+36.0756 - V1:+36.0756 - S5:+79.96633	5	5	1	a7.a1.a1	5.1e-06	2	1255.68	1255.68	0.0014	1.11494
a7	a7.a1	pepa7a1b10	02_T1_1b_HCDOT	16420	35.6	VVFDDMTDTKTLPK	K10:+36.0756 - K14:+36.0756 - V1:+36.0756 - M6:+15.99491 - T9:+79.96633	9	7 9	1	a7.a1.a1	0.00022	3	1814.01	1814	0.0036	1.98456
a7	a7.a1	pepa7a1b10	02_T1_1b_HCDOT	16430	35.61	VVFDDMTDTKTLPK	K10:+36.0756 - K14:+36.0756 - V1:+36.0756 - M6:+15.99491 - T9:+79.96633	9	7 9	1	a7.a1.a1	8.6e-08	2	1814.01	1814	0.0051	2.81146
a7	a7.a1	pepa7a1b10	01_T1_1a_HCDOT	15123	35.43	VVFDDMTDTKTLPK	K10:+36.0756 - K14:+36.0756 - V1:+36.0756 - M6:+15.99491 - T9:+79.96633	9	7 9	1	a7.a1.a1	4.9e-06	2	1814.01	1814	0.0035	1.92943
a7	a7.a1	pepa7a1b10	28_T3_1b_HCDOT	14054	35.53	VVFDDMTDTKTLPK	K10:+36.0756 - K14:+36.0756 - V1:+36.0756 - M6:+15.99491 - T9:+79.96633	9	7 9	1	a7.a1.a1	0.00086	2	1814.01	1814	0.0024	1.32304
a7	a7.a1	pepa7a1b10	01_T1_1a_HCDOT	15109	35.4	VVFDDMTDTKTLPK	K10:+36.0756 - K14:+36.0756 - V1:+36.0756 - M6:+15.99491 - T9:+79.96633	9	7 9	1	a7.a1.a1	0.0001	3	1814	1814	0.0012	0.661521
a7	a7.a1	pepa7a1a8	01_T1_1a_HCDOT	18264	40.03	VVFDDMTDTKTLPK	K10:+36.0756 - K14:+36.0756 - V1:+36.0756 - T9:+79.96633	9	9	1	a7.a1.a1	1e-06	2	1798.01	1798.01	0.0041	2.2803
a7	a7.a1	pepa7a1a8	02_T1_1b_HCDOT	19573	40.31	VVFDDMTDTKTLPK	K10:+36.0756 - K14:+36.0756 - V1:+36.0756 - T9:+79.96633	9	9	1	a7.a1.a1	5.2e-07	2	1798.01	1798.01	0.0019	1.05673
a7	a7.a1	pepa7a1a8	03_T1_2a_HCDOT	16717	40.56	VVFDDMTDTKTLPK	K10:+36.0756 - K14:+36.0756 - V1:+36.0756 - T9:+79.96633	9	9	1	a7.a1.a1	6e-06	2	1798.01	1798.01	0.0044	2.44715
a7	a7.a1	pepa7a1a8	01_T1_1a_HCDOT	18252	40.01	VVFDDMTDTKTLPK	K10:+36.0756 - K14:+36.0756 - V1:+36.0756 - T9:+79.96633	9	9	1	a7.a1.a1	9e-08	2	1798.01	1798.01	0.0051	2.83647
a7	a7.a1	pepa7a1a8	04_T1_2b_HCDOT	16030	40.43	VVFDDMTDTKTLPK	K10:+36.0756 - K14:+36.0756 - V1:+36.0756 - T9:+79.96633	9	9	1	a7.a1.a1	9.4e-05	2	1798.01	1798.01	0.0034	1.89098
a7	a7.a1	pepa7a1a8	27_T3_1a_HCDOT	16965	40.05	VVFDDMTDTKTLPK	K10:+36.0756 - K14:+36.0756 - V1:+36.0756 - T9:+79.96633	9	9	1	a7.a1.a1	1.3e-08	2	1798.01	1798.01	0.0017	0.945491
a7	a7.a1	pepa7a1a8	28_T3_1b_HCDOT	16926	40.08	VVFDDMTDTKTLPK	K10:+36.0756 - K14:+36.0756 - V1:+36.0756 - T9:+79.96633	9	9	1	a7.a1.a1	4e-08	2	1798.01	1798.01	0.0026	1.44604
a7	a7.a1	pepa7a1a8	02_T1_1b_HCDOT	19563	40.3	VVFDDMTDTKTLPK	K10:+36.0756 - K14:+36.0756 - V1:+36.0756 - T9:+79.96633	9	9	1	a7.a1.a1	0.0003	3	1798.01	1798.01	0.0043	2.39154
a7	a7.a1	pepa7a1a5	01_T1_1a_HCDOT	18287	40.06	VVFDDMTDTKTLPK	K10:+28.0313 - K14:+28.0313 - V1:+28.0313 - T7:+79.96633	7	7 9	1	a7.a1.a1	0.00021	3	1773.88	1773.87	0.0042	2.3677
a7	a7.a1	pepa7a1a5	02_T1_1b_HCDOT	19605	40.36	VVFDDMTDTKTLPK	K10:+28.0313 - K14:+28.0313 - V1:+28.0313 - T9:+79.96633	9	7 9	1	a7.a1.a1	0.00081	3	1773.88	1773.87	0.0035	1.97308
a7	a7.a1	pepa7a1a5	40_T4_1a_HCDOT	16800	40.03	VVFDDMTDTKTLPK	K10:+28.0313 - K14:+28.0313 - V1:+28.0313 - T9:+79.96633	9	7 9	1	a7.a1.a1	0.00019	3	1773.88	1773.87	0.0061	3.4388
a7	a7.a1	pepa7a1a5	14_T2_1a_HCDOT	17803	39.85	VVFDDMTDTKTLPK	K10:+28.0313 - K14:+28.0313 - V1:+28.0313 - T9:+79.96633	9	7 9	1	a7.a1.a1	2.7e-05	3	1773.88	1773.87	0.002	1.12748
a7	a7.a1	pepa7a1a5	14_T2_1a_HCDOT	17823	39.86	VVFDDMTDTKTLPK	K10:+28.0313 - K14:+28.0313 - V1:+28.0313 - T9:+79.96633	9	7 9	1	a7.a1.a1	2e-08	2	1773.88	1773.87	0.0013	0.732859
a7	a7.a1	pepa7a1a5	01_T1_1a_HCDOT	18339	40.15	VVFDDMTDTKTLPK	K10:+28.0313 - K14:+28.0313 - V1:+28.0313 - T9:+79.96633	9	7 9	1	a7.a1.a1	4.8e-08	2	1773.88	1773.87	0.0033	1.86033
a7	a7.a1	pepa7a1a7	02_T1_1b_HCDOT	16467	35.68	VVFDDMTDTKTLPK	K10:+28.0313 - K14:+28.0313 - V1:+28.0313 - M6:+15.99491 - T7:+79.96633	7	7 9	1	a7.a1.a1	7.8e-05	2	1789.87	1789.87	0.0009	0.50283
a7	a7.a1	pepa7a1a7	14_T2_1a_HCDOT	14823	35.33	VVFDDMTDTKTLPK	K10:+28.0313 - K14:+28.0313 - V1:+28.0313 - M6:+15.99491 - T9:+79.96633	9	7 9	1	a7.a1.a1	0.00012	2	1789.87	1789.87	0.0015	0.83805
a7	a7.a1	pepa7a1b12	27_T3_1a_HCDOT	18420	42.38	VVFDDMTDTKTLPKVDSVSSVGPEK	K10:+36.0756 - K14:+36.0756 - K25:+36.0756 - V1:+36.0756 - T11:+79.96633	11	7 9 11	1	a7.a1.a1	0.00047	3	2918.63	2918.62	0.0018	0.616729
a7	a7.a1	pepa7a1b12	02_T1_1b_HCDOT	21145	42.75	VVFDDMTDTKTLPKVDSVSSVGPEK	K10:+36.0756 - K14:+36.0756 - K25:+36.0756 - V1:+36.0756 - T9:+79.96633	9	7 9 11	1	a7.a1.a1	3.2e-08	3	2918.63	2918.62	0.0041	1.40477
a7	a7.a1	pepa7a1a9	15_T2_1b_HCDOT	15451	35.36	VVFDDMTDTKTLPK	K10:+32.0564 - K14:+32.0564 - V1:+32.0564 - M6:+15.99491 - T9:+79.96633	9	9	1	a7.a1.a1	1.2e-05	2	1801.95	1801.95	0.003	1.66487
a7	a7.a1	pepa7a1a9	14_T2_1a_HCDOT	14736	35.18	VVFDDMTDTKTLPK	K10:+32.0564 - K14:+32.0564 - V1:+32.0564 - M6:+15.99491 - T9:+79.96633	9	9	1	a7.a1.a1	4.6e-07	2	1801.95	1801.95	0.0014	0.776938
a7	a7.a1	pepa7a1a9	40_T4_1a_HCDOT	13848	35.36	VVFDDMTDTKTLPK	K10:+32.0564 - K14:+32.0564 - V1:+32.0564 - M6:+15.99491 - T9:+79.96633	9	9	1	a7.a1.a1	0.00041	3	1801.95	1801.95	0.0035	1.94235
a7	a7.a1	pepa7a1a9	40_T4_1a_HCDOT	13845	35.35	VVFDDMTDTKTLPK	K10:+32.0564 - K14:+32.0564 - V1:+32.0564 - M6:+15.99491 - T9:+79.96633	9	9	1	a7.a1.a1	7e-07	2	1801.95	1801.95	0.0049	2.71928
a7	a7.a1	pepa7a1a6	42_T4_2a_HCDOT	13932	40.61	VVFDDMTDTKTLPK	K10:+32.0564 - K14:+32.0564 - V1:+32.0564 - T9:+79.96633	9	7 9	1	a7.a1.a1	0.00017	3	1785.95	1785.95	0.002	1.11985
a7	a7.a1	pepa7a1a6	40_T4_1a_HCDOT	16772	39.98	VVFDDMTDTKTLPK	K10:+32.0564 - K14:+32.0564 - V1:+32.0564 - T7:+79.96633	7	7 9	1	a7.a1.a1	0.0003	2	1785.96	1785.95	0.0064	3.58353
a7	a7.a1	pepa7a1a6	14_T2_1a_HCDOT	17763	39.78	VVFDDMTDTKTLPK	K10:+32.0564 - K14:+32.0564 - V1:+32.0564 - T9:+79.96633	9	7 9	1	a7.a1.a1	2.6e-14	2	1785.95	1785.95	0.0028	1.56779
a7	a7.a1	pepa7a1a6	41_T4_1b_HCDOT	17633	41.1	VVFDDMTDTKTLPK	K10:+32.0564 - K14:+32.0564 - V1:+32.0564 - T9:+79.96633	9	7 9	1	a7.a1.a1	3.9e-05	3	1785.95	1785.95	0.0038	2.12772
a7	a7.a1	pepa7a1a6	14_T2_1a_HCDOT	17764	39.78	VVFDDMTDTKTLPK	K10:+32.0564 - K14:+32.0564 - V1:+32.0564 - T9:+79.96633	9	7 9	1	a7.a1.a1	2.1e-05	3	1785.95	1785.95	0.0022	1.23184
a7	a7.a1	pepa7a1a6	41_T4_1b_HCDOT	17661	41.15	VVFDDMTDTKTLPK	K10:+32.0564 - K14:+32.0564 - V1:+32.0564 - T9:+79.96633	9	7 9	1	a7.a1.a1	1.5e-07	2	1785.95	1785.95	0.0046	2.57566
a7	a7.a1	pepa7a1a6	41_T4_1b_HCDOT	17243	40.43	VVFDDMTDTKTLPK	K10:+32.0564 - K14:+32.0564 - V1:+32.0564 - T9:+79.96633	9	7 9	1	a7.a1.a1	4.4e-09	2	1785.95	1785.95	0.0024	1.34382
a7	a7.a1	pepa7a1a6	15_T2_1b_HCDOT	18473	40.08	VVFDDMTDTKTLPK	K10:+32.0564 - K14:+32.0564 - V1:+32.0564 - T9:+79.96633	9	7 9	1	a7.a1.a1	2.2e-09	2	1785.95	1785.95	0.0018	1.00787
a7	a7.a1	pepa7a1a6	15_T2_1b_HCDOT	18459	40.06	VVFDDMTDTKTLPK	K10:+32.0564 - K14:+32.0564 - V1:+32.0564 - T9:+79.96633	9	7 9	1	a7.a1.a1	0.00024	3	1785.95	1785.95	0.0014	0.783896
a7	a7.a1	pepa7a1b11	14_T2_1a_HCDOT	19252	42.1	VVFDDMTDTKTLPKVDSVSSVGPEK	K10:+32.0564 - K14:+32.0564 - K25:+32.0564 - V1:+32.0564 - T7:+79.96633	7	7 9	1	a7.a1.a1	9.1e-10	3	2902.54	2902.55	-0.0018	-0.620145
a7	a7.a1	pepa7a1b11	15_T2_1b_HCDOT	19901	42.36	VVFDDMTDTKTLPKVDSVSSVGPEK	K10:+32.0564 - K14:+32.0564 - K25:+32.0564 - V1:+32.0564 - T7:+79.96633	7	7 9	1	a7.a1.a1	4.2e-07	3	2902.55	2902.55	0.0048	1.65372
a7	a7.a1	pepa7a1a4	15_T2_1b_HCDOT	14772	34.31	VVFDDMTDTK	K10:+32.0564 - V1:+32.0564 - M6:+15.99491 - T9:+79.96633	9	9	1	a7.a1.a1	0.00029	2	1330.61	1330.61	0.0019	1.42792
a7	a7.a1	pepa7a1a3	17_T2_2b_HCDOT	15495	40.48	VVFDDMTDTK	K10:+32.0564 - V1:+32.0564 - T9:+79.96633	9	9	1	a7.a1.a1	0.00086	2	1314.62	1314.61	0.0019	1.44529
a7	a7.a1	pepa7a1a3	16_T2_2a_HCDOT	15766	40.5	VVFDDMTDTK	K10:+32.0564 - V1:+32.0564 - T9:+79.96633	9	9	1	a7.a1.a1	0.00037	2	1314.62	1314.61	0.0015	1.14102
a7	a7.a2	pepa7a2a2	05_T1_3a_HCDOT	25447	60.8	VTDFGIAVAFAETSLTQTNSMLGSVHYLSPEQAR	V1:+36.0756 - S14:+79.96633	14	14 16 18 20 24	1	a7.a2.a1	8.7e-13	3	3756.85	3756.84	0.01	2.66181
a8	a8.a1	pepa8a1a3	15_T2_1b_HCDOT	16765	37.45	TENASAGVMISASHNPALDNGIK	K23:+28.0313 - T1:+28.0313 - M9:+15.99491 - S13:+79.96633	13	11 13	1	a8.a1.a1	7.9e-07	3	2449.14	2449.14	-0.0028	-1.14326
a8	a8.a1	pepa8a1a3	14_T2_1a_HCDOT	16159	37.35	TENASAGVMISASHNPALDNGIK	K23:+28.0313 - T1:+28.0313 - M9:+15.99491 - S13:+79.96633	13	11 13	1	a8.a1.a1	3.2e-05	2	2449.15	2449.14	0.0079	3.22562
a8	a8.a1	pepa8a1a3	41_T4_1b_HCDOT	15566	37.83	TENASAGVMISASHNPALDNGIK	K23:+28.0313 - T1:+28.0313 - M9:+15.99491 - S11:+79.96633	11	11 13	1	a8.a1.a1	2.5e-07	3	2449.15	2449.14	0.0046	1.87821
a8	a8.a1	pepa8a1a3	01_T1_1a_HCDOT	16509	37.45	TENASAGVMISASHNPALDNGIK	K23:+28.0313 - T1:+28.0313 - M9:+15.99491 - S13:+79.96633	13	11 13	1	a8.a1.a1	2.2e-12	3	2449.15	2449.14	0.0036	1.4699
a8	a8.a1	pepa8a1a6	14_T2_1a_HCDOT	16266	37.51	TENASAGVMISASHNPALDNGIK	K23:+36.0756 - T1:+36.0756 - M9:+15.99491 - S13:+79.96633	13	11 13	1	a8.a1.a1	0.00039	3	2465.23	2465.23	-0.0015	-0.608462
a8	a8.a1	pepa8a1a6	02_T1_1b_HCDOT	17877	37.8	TENASAGVMISASHNPALDNGIK	K23:+36.0756 - T1:+36.0756 - M9:+15.99491 - S13:+79.96633	13	11 13	1	a8.a1.a1	2.4e-09	2	2465.24	2465.23	0.0059	2.39328
a8	a8.a1	pepa8a1a6	01_T1_1a_HCDOT	16574	37.55	TENASAGVMISASHNPALDNGIK	K23:+36.0756 - T1:+36.0756 - M9:+15.99491 - S13:+79.96633	13	11 13	1	a8.a1.a1	3.8e-10	2	2465.23	2465.23	0.0018	0.730154
a8	a8.a1	pepa8a1a6	01_T1_1a_HCDOT	16517	37.46	TENASAGVMISASHNPALDNGIK	K23:+36.0756 - T1:+36.0756 - M9:+15.99491 - S11:+79.96633	11	11 13	1	a8.a1.a1	7.1e-08	3	2465.23	2465.23	0.0025	1.0141
a8	a8.a1	pepa8a1a5	15_T2_1b_HCDOT	16742	37.41	TENASAGVMISASHNPALDNGIK	K23:+32.0564 - T1:+32.0564 - M9:+15.99491 - S13:+79.96633	13	11 13	1	a8.a1.a1	1.6e-10	3	2457.19	2457.19	0.0002	0.0813937
a8	a8.a1	pepa8a1a5	01_T1_1a_HCDOT	16534	37.48	TENASAGVMISASHNPALDNGIK	K23:+32.0564 - T1:+32.0564 - M9:+15.99491 - S13:+79.96633	13	11 13	1	a8.a1.a1	1.3e-08	3	2457.2	2457.19	0.0061	2.48251
a8	a8.a1	pepa8a1a5	41_T4_1b_HCDOT	15556	37.8	TENASAGVMISASHNPALDNGIK	K23:+32.0564 - T1:+32.0564 - M9:+15.99491 - S11:+79.96633	11	11 13	1	a8.a1.a1	3e-07	3	2457.2	2457.19	0.0018	0.732543
a8	a8.a1	pepa8a1a5	28_T3_1b_HCDOT	15318	37.56	TENASAGVMISASHNPALDNGIK	K23:+32.0564 - T1:+32.0564 - M9:+15.99491 - S13:+79.96633	13	11 13	1	a8.a1.a1	1.6e-06	3	2457.2	2457.19	0.0053	2.15693
a8	a8.a1	pepa8a1a5	14_T2_1a_HCDOT	16185	37.38	TENASAGVMISASHNPALDNGIK	K23:+32.0564 - T1:+32.0564 - M9:+15.99491 - S13:+79.96633	13	11 13	1	a8.a1.a1	1.4e-07	2	2457.19	2457.19	-0.0001	-0.0406968
a8	a8.a1	pepa8a1a1	40_T4_1a_HCDOT	16883	40.16	TENASAGVMISASHNPALDNGIK	K23:+28.0313 - T1:+28.0313 - S11:+79.96633	11	11 13	1	a8.a1.a1	2.2e-10	2	2433.16	2433.15	0.0077	3.16462
a8	a8.a1	pepa8a1a1	02_T1_1b_HCDOT	19679	40.48	TENASAGVMISASHNPALDNGIK	K23:+28.0313 - T1:+28.0313 - S13:+79.96633	13	11 13	1	a8.a1.a1	5.2e-13	2	2433.15	2433.15	0.0045	1.84946
a8	a8.a1	pepa8a1a1	02_T1_1b_HCDOT	19623	40.4	TENASAGVMISASHNPALDNGIK	K23:+28.0313 - T1:+28.0313 - S13:+79.96633	13	11 13	1	a8.a1.a1	4.2e-09	3	2433.15	2433.15	0.0056	2.30154
a8	a8.a1	pepa8a1a1	40_T4_1a_HCDOT	16833	40.08	TENASAGVMISASHNPALDNGIK	K23:+28.0313 - T1:+28.0313 - S13:+79.96633	13	11 13	1	a8.a1.a1	1.6e-08	3	2433.16	2433.15	0.0069	2.83583
a8	a8.a1	pepa8a1a1	14_T2_1a_HCDOT	17804	39.85	TENASAGVMISASHNPALDNGIK	K23:+28.0313 - T1:+28.0313 - S11:+79.96633	11	11 13	1	a8.a1.a1	5.9e-09	3	2433.15	2433.15	0.0021	0.863079
a8	a8.a1	pepa8a1a1	41_T4_1b_HCDOT	17680	41.18	TENASAGVMISASHNPALDNGIK	K23:+28.0313 - T1:+28.0313 - S11:+79.96633	11	11 13	1	a8.a1.a1	1.9e-06	3	2433.15	2433.15	0.0003	0.123297
a8	a8.a1	pepa8a1a1	41_T4_1b_HCDOT	17380	40.7	TENASAGVMISASHNPALDNGIK	K23:+28.0313 - T1:+28.0313 - S13:+79.96633	13	11 13	1	a8.a1.a1	1e-15	2	2433.16	2433.15	0.01	4.1099
a8	a8.a1	pepa8a1a1	41_T4_1b_HCDOT	17343	40.61	TENASAGVMISASHNPALDNGIK	K23:+28.0313 - T1:+28.0313 - S13:+79.96633	13	11 13	1	a8.a1.a1	6.6e-07	3	2433.15	2433.15	0.0039	1.60286
a8	a8.a1	pepa8a1a1	15_T2_1b_HCDOT	18569	40.25	TENASAGVMISASHNPALDNGIK	K23:+28.0313 - T1:+28.0313 - S13:+79.96633	13	11 13	1	a8.a1.a1	1.3e-07	2	2433.16	2433.15	0.0086	3.53452
a8	a8.a1	pepa8a1a1	14_T2_1a_HCDOT	17945	40.05	TENASAGVMISASHNPALDNGIK	K23:+28.0313 - T1:+28.0313 - S13:+79.96633	13	11 13	1	a8.a1.a1	1.8e-10	2	2433.16	2433.15	0.0099	4.0688
a8	a8.a1	pepa8a1a1	01_T1_1a_HCDOT	18271	40.03	TENASAGVMISASHNPALDNGIK	K23:+28.0313 - T1:+28.0313 - S11:+79.96633	11	11 13	1	a8.a1.a1	5.8e-09	2	2433.16	2433.15	0.0084	3.45232
a8	a8.a1	pepa8a1a4	15_T2_1b_HCDOT	18531	40.18	TENASAGVMISASHNPALDNGIK	K23:+36.0756 - T1:+36.0756 - S11:+79.96633	11	11 13	1	a8.a1.a1	6.5e-13	2	2449.24	2449.24	0.0072	2.93969
a8	a8.a1	pepa8a1a4	01_T1_1a_HCDOT	18276	40.05	TENASAGVMISASHNPALDNGIK	K23:+36.0756 - T1:+36.0756 - S11:+79.96633	11	11 13	1	a8.a1.a1	5.4e-09	3	2449.24	2449.24	0.0044	1.79648
a8	a8.a1	pepa8a1a4	27_T3_1a_HCDOT	16987	40.08	TENASAGVMISASHNPALDNGIK	K23:+36.0756 - T1:+36.0756 - S11:+79.96633	11	11 13	1	a8.a1.a1	4.1e-13	3	2449.24	2449.24	0.003	1.22487
a8	a8.a1	pepa8a1a4	02_T1_1b_HCDOT	19600	40.36	TENASAGVMISASHNPALDNGIK	K23:+36.0756 - T1:+36.0756 - S13:+79.96633	13	11 13	1	a8.a1.a1	3.4e-09	3	2449.24	2449.24	0.0054	2.20477
a8	a8.a1	pepa8a1a4	01_T1_1a_HCDOT	18320	40.11	TENASAGVMISASHNPALDNGIK	K23:+36.0756 - T1:+36.0756 - S11:+79.96633	11	11 13	1	a8.a1.a1	3.2e-12	2	2449.24	2449.24	0.005	2.04145
a8	a8.a1	pepa8a1a4	40_T4_1a_HCDOT	16864	40.13	TENASAGVMISASHNPALDNGIK	K23:+36.0756 - T1:+36.0756 - S11:+79.96633	11	11 13	1	a8.a1.a1	2.5e-07	2	2449.24	2449.24	0.0079	3.22549
a8	a8.a1	pepa8a1a4	27_T3_1a_HCDOT	17019	40.13	TENASAGVMISASHNPALDNGIK	K23:+36.0756 - T1:+36.0756 - S13:+79.96633	13	11 13	1	a8.a1.a1	4.1e-09	2	2449.25	2449.24	0.0082	3.34798
a8	a8.a1	pepa8a1a4	15_T2_1b_HCDOT	18510	40.15	TENASAGVMISASHNPALDNGIK	K23:+36.0756 - T1:+36.0756 - S11:+79.96633	11	11 13	1	a8.a1.a1	2.1e-10	3	2449.24	2449.24	0.0041	1.67399
a8	a8.a1	pepa8a1a4	28_T3_1b_HCDOT	16936	40.1	TENASAGVMISASHNPALDNGIK	K23:+36.0756 - T1:+36.0756 - S13:+79.96633	13	11 13	1	a8.a1.a1	5.3e-07	3	2449.24	2449.24	0.0035	1.42902
a8	a8.a1	pepa8a1a4	14_T2_1a_HCDOT	17810	39.85	TENASAGVMISASHNPALDNGIK	K23:+36.0756 - T1:+36.0756 - S13:+79.96633	13	11 13	1	a8.a1.a1	2.9e-11	2	2449.24	2449.24	0.0011	0.449119
a8	a8.a1	pepa8a1a4	40_T4_1a_HCDOT	16900	40.18	TENASAGVMISASHNPALDNGIK	K23:+36.0756 - T1:+36.0756 - S13:+79.96633	13	11 13	1	a8.a1.a1	4.3e-12	3	2449.24	2449.24	0.0061	2.49057
a8	a8.a1	pepa8a1a2	15_T2_1b_HCDOT	18477	40.1	TENASAGVMISASHNPALDNGIK	K23:+32.0564 - T1:+32.0564 - S13:+79.96633	13	11 13	1	a8.a1.a1	5.6e-11	3	2441.2	2441.2	0.0045	1.84336
a8	a8.a1	pepa8a1a2	15_T2_1b_HCDOT	18519	40.16	TENASAGVMISASHNPALDNGIK	K23:+32.0564 - T1:+32.0564 - S11:+79.96633	11	11 13	1	a8.a1.a1	5.8e-13	2	2441.2	2441.2	0.0058	2.37588
a8	a8.a1	pepa8a1a2	41_T4_1b_HCDOT	17265	40.48	TENASAGVMISASHNPALDNGIK	K23:+32.0564 - T1:+32.0564 - S11:+79.96633	11	11 13	1	a8.a1.a1	1.6e-12	3	2441.2	2441.2	0.0062	2.53974
a8	a8.a1	pepa8a1a2	02_T1_1b_HCDOT	19624	40.4	TENASAGVMISASHNPALDNGIK	K23:+32.0564 - T1:+32.0564 - S11:+79.96633	11	11 13	1	a8.a1.a1	9.4e-11	3	2441.21	2441.2	0.0089	3.64575
a8	a8.a1	pepa8a1a2	41_T4_1b_HCDOT	17398	40.73	TENASAGVMISASHNPALDNGIK	K23:+32.0564 - T1:+32.0564 - S13:+79.96633	13	11 13	1	a8.a1.a1	1e-15	2	2441.21	2441.2	0.009	3.68671
a8	a8.a1	pepa8a1a2	40_T4_1a_HCDOT	16802	40.03	TENASAGVMISASHNPALDNGIK	K23:+32.0564 - T1:+32.0564 - S11:+79.96633	11	11 13	1	a8.a1.a1	9.2e-10	3	2441.21	2441.2	0.011	4.50598
a8	a8.a1	pepa8a1a2	28_T3_1b_HCDOT	16946	40.11	TENASAGVMISASHNPALDNGIK	K23:+32.0564 - T1:+32.0564 - S11:+79.96633	11	11 13	1	a8.a1.a1	3.3e-10	3	2441.2	2441.2	0.0056	2.29396
a8	a8.a1	pepa8a1a2	27_T3_1a_HCDOT	17061	40.2	TENASAGVMISASHNPALDNGIK	K23:+32.0564 - T1:+32.0564 - S11:+79.96633	11	11 13	1	a8.a1.a1	3.8e-13	2	2441.2	2441.2	0.0036	1.47469
a9	a9.a1	pepa9a1a3	03_T1_2a_HCDOT	27685	58.7	ARDNGYAVGGFNTNNLEWTQAILR	A1:+28.0313 - Y6:+79.96633	6	6	1	a9.a1.a1	1.7e-12	3	2788.32	2788.32	0.0013	0.46623
a9	a9.a1	pepa9a1a3	14_T2_1a_HCDOT	29923	58.05	ARDNGYAVGGFNTNNLEWTQAILR	A1:+28.0313 - Y6:+79.96633	6	6	1	a9.a1.a1	1.7e-10	3	2788.32	2788.32	-0.0035	-1.25524
a9	a9.a1	pepa9a1a3	15_T2_1b_HCDOT	30469	58.35	ARDNGYAVGGFNTNNLEWTQAILR	A1:+28.0313 - Y6:+79.96633	6	6	1	a9.a1.a1	4.5e-07	3	2788.32	2788.32	-0.0027	-0.968325
a9	a9.a1	pepa9a1a3	17_T2_2b_HCDOT	25554	58.18	ARDNGYAVGGFNTNNLEWTQAILR	A1:+28.0313 - Y6:+79.96633	6	6	1	a9.a1.a1	7e-10	3	2788.32	2788.32	-0.0009	-0.322775
a9	a9.a1	pepa9a1a5	43_T4_2b_HCDOT	23895	58.55	ARDNGYAVGGFNTNNLEWTQAILR	A1:+36.0756 - Y6:+79.96633	6	6 13	1	a9.a1.a1	0.00032	3	2796.36	2796.36	-0.0028	-1.0013
a9	a9.a1	pepa9a1a5	04_T1_2b_HCDOT	26824	58.6	ARDNGYAVGGFNTNNLEWTQAILR	A1:+36.0756 - Y6:+79.96633	6	6 13	1	a9.a1.a1	2.1e-07	3	2796.37	2796.36	0.0008	0.286086
a9	a9.a1	pepa9a1a5	10_T1_5b_HCDOT	24291	58.06	ARDNGYAVGGFNTNNLEWTQAILR	A1:+36.0756 - Y6:+79.96633	6	6 13	1	a9.a1.a1	0.00025	3	2796.36	2796.36	-0.0003	-0.107282
a9	a9.a1	pepa9a1a5	14_T2_1a_HCDOT	29902	58.03	ARDNGYAVGGFNTNNLEWTQAILR	A1:+36.0756 - Y6:+79.96633	6	6 13	1	a9.a1.a1	7.4e-09	3	2796.36	2796.36	-0.0032	-1.14434
a9	a9.a1	pepa9a1a5	30_T3_2b_HCDOT	23563	58.45	ARDNGYAVGGFNTNNLEWTQAILR	A1:+36.0756 - T13:+79.96633	13	6 13	1	a9.a1.a1	0.00025	3	2796.36	2796.36	-0.0001	-0.0357607
a9	a9.a1	pepa9a1a5	17_T2_2b_HCDOT	25492	58.06	ARDNGYAVGGFNTNNLEWTQAILR	A1:+36.0756 - T13:+79.96633	13	6 13	1	a9.a1.a1	0.00024	3	2796.36	2796.36	-0.0001	-0.0357607
a9	a9.a1	pepa9a1b10	16_T2_2a_HCDOT	27388	60.71	NGYAVGGFNTNNLEWTQAILR	N1:+36.0756 - Y3:+79.96633 - N1:+42.01056	3	3 10	1	a9.a1.a1	1.5e-06	3	2496.2	2496.21	-0.013	-5.2079
a9	a9.a1	pepa9a1b10	30_T3_2b_HCDOT	23119	57.65	NGYAVGGFNTNNLEWTQAILR	N1:+36.0756 - T10:+79.96633 - N1:+42.01056	10	3 10	1	a9.a1.a1	0.00073	3	2496.2	2496.21	-0.0075	-3.00455
a9	a9.a1	pepa9a1b10	30_T3_2b_HCDOT	24868	60.76	NGYAVGGFNTNNLEWTQAILR	N1:+36.0756 - Y3:+79.96633 - N1:+42.01056	3	3 10	1	a9.a1.a1	5.2e-06	3	2496.2	2496.21	-0.011	-4.40668
a9	a9.a1	pepa9a1b10	17_T2_2b_HCDOT	27020	60.73	NGYAVGGFNTNNLEWTQAILR	N1:+36.0756 - Y3:+79.96633 - N1:+42.01056	3	3 10	1	a9.a1.a1	8.9e-10	3	2496.2	2496.21	-0.014	-5.6085
a9	a9.a1	pepa9a1b10	04_T1_2b_HCDOT	28298	60.9	NGYAVGGFNTNNLEWTQAILR	N1:+36.0756 - Y3:+79.96633 - N1:+42.01056	3	3 10	1	a9.a1.a1	1e-15	3	2496.19	2496.21	-0.016	-6.40972
a9	a9.a1	pepa9a1b11	15_T2_1b_HCDOT	31271	59.56	SAEKFVQAARDNGYAVGGFNTNNLEWTQAILR	K4:+36.0756 - S1:+36.0756 - S1:+79.96633 - S1:+42.01056	1	1 14	1	a9.a1.a1	2.2e-15	3	3734.91	3734.89	0.019	5.08716
a9	a9.a1	pepa9a1b11	28_T3_1b_HCDOT	29716	59.96	SAEKFVQAARDNGYAVGGFNTNNLEWTQAILR	K4:+36.0756 - S1:+36.0756 - S1:+79.96633 - S1:+42.01056	1	1 14	1	a9.a1.a1	2e-11	3	3734.9	3734.89	0.0096	2.57036
a9	a9.a1	pepa9a1b11	40_T4_1a_HCDOT	31147	61.85	SAEKFVQAARDNGYAVGGFNTNNLEWTQAILR	K4:+36.0756 - S1:+36.0756 - S1:+79.96633 - S1:+42.01056	1	1 14	1	a9.a1.a1	1.2e-11	3	3734.91	3734.89	0.015	4.01618
a9	a9.a1	pepa9a1b11	14_T2_1a_HCDOT	29794	57.86	SAEKFVQAARDNGYAVGGFNTNNLEWTQAILR	K4:+36.0756 - S1:+36.0756 - Y14:+79.96633 - S1:+42.01056	14	1 14	1	a9.a1.a1	1e-15	3	3734.89	3734.89	-0.0006	-0.160647
a9	a9.a1	pepa9a1b11	43_T4_2b_HCDOT	25172	60.68	SAEKFVQAARDNGYAVGGFNTNNLEWTQAILR	K4:+36.0756 - S1:+36.0756 - Y14:+79.96633 - S1:+42.01056	14	1 14	1	a9.a1.a1	5.1e-06	3	3734.89	3734.89	0.0016	0.428393
a9	a9.a1	pepa9a1a1	14_T2_1a_HCDOT	31592	60.58	AEKFVQAARDNGYAVGGFNTNNLEWTQAILR	K3:+32.0564 - A1:+32.0564 - T20:+79.96633 - Y13:+79.96633 - A1:+42.01056	13 20	13 20	1	a9.a1.a1	4.5e-07	3	3719.8	3719.79	0.017	4.57016
a9	a9.a1	pepa9a1a8	43_T4_2b_HCDOT	25441	61.11	NGYAVGGFNTNNLEWTQAILR	N1:+36.0756 - Y3:+79.96633	3	3 10	1	a9.a1.a1	0.00094	3	2454.19	2454.2	-0.0065	-2.64852
a9	a9.a1	pepa9a1a8	43_T4_2b_HCDOT	25430	61.1	NGYAVGGFNTNNLEWTQAILR	N1:+36.0756 - Y3:+79.96633	3	3 10	1	a9.a1.a1	3e-06	3	2454.19	2454.2	-0.005	-2.03732
a9	a9.a1	pepa9a1a8	16_T2_2a_HCDOT	27531	60.93	NGYAVGGFNTNNLEWTQAILR	N1:+36.0756 - T10:+79.96633	10	3 10	1	a9.a1.a1	1.1e-05	2	2454.19	2454.2	-0.012	-4.88958
a9	a9.a1	pepa9a1a4	42_T4_2a_HCDOT	24297	58.53	ARDNGYAVGGFNTNNLEWTQAILR	A1:+32.0564 - T13:+79.96633	13	6 13	1	a9.a1.a1	6.5e-06	3	2792.34	2792.35	-0.0063	-2.25617
a9	a9.a1	pepa9a1a4	27_T3_1a_HCDOT	28769	58.15	ARDNGYAVGGFNTNNLEWTQAILR	A1:+32.0564 - T13:+79.96633	13	6 13	1	a9.a1.a1	0.00019	3	2792.33	2792.35	-0.016	-5.72995
a9	a9.a1	pepa9a1a2	27_T3_1a_HCDOT	32481	63.86	AEKFVQAARDNGYAVGGFNTNNLEWTQAILR	K3:+36.0756 - A1:+36.0756 - T20:+79.96633 - Y13:+79.96633 - A1:+42.01056	13 20	13 20	1	a9.a1.a1	0.00027	3	3727.79	3727.82	-0.036	-9.65711
a9	a9.a1	pepa9a1a6	40_T4_1a_HCDOT	30626	61.08	EKFVQAARDNGYAVGGFNTNNLEWTQAILR	K2:+36.0756 - E1:+36.0756 - T19:+79.96633 - Y12:+79.96633 - E1:+42.01056	12 19	12 19	1	a9.a1.a1	0.00061	3	3656.76	3656.79	-0.031	-8.47738
a9	a9.a1	pepa9a1a9	41_T4_1b_HCDOT	29942	59.91	NGYAVGGFNTNNLEWTQAILR	N1:+28.0313 - Y3:+79.96633 - N1:+42.01056	3	3	1	a9.a1.a1	5.5e-07	2	2488.19	2488.17	0.025	10.0476
a9	a9.a2	pepa9a2b12	01_T1_1a_HCDOT	20870	43.96	VNVNTECQIAFANATR	C7:+57.02146 - V1:+28.0313 - T5:+79.96633	5	5	1	a9.a2.a1	3.5e-09	2	1915.87	1915.87	0.0007	0.365369
a9	a9.a2	pepa9a2b12	27_T3_1a_HCDOT	19393	43.88	VNVNTECQIAFANATR	C7:+57.02146 - V1:+28.0313 - T5:+79.96633	5	5	1	a9.a2.a1	2.3e-06	2	1915.87	1915.87	0.0006	0.313173
a9	a9.a2	pepa9a2b14	01_T1_1a_HCDOT	20871	43.96	VNVNTECQIAFANATR	C7:+57.02146 - V1:+36.0756 - T5:+79.96633	5	5	1	a9.a2.a1	4.4e-06	3	1923.92	1923.92	0.0031	1.6113
a9	a9.a2	pepa9a2b14	02_T1_1b_HCDOT	22106	44.18	VNVNTECQIAFANATR	C7:+57.02146 - V1:+36.0756 - T5:+79.96633	5	5	1	a9.a2.a1	1.3e-07	2	1923.92	1923.92	0.0022	1.1435
a9	a9.a2	pepa9a2b14	41_T4_1b_HCDOT	19570	44.13	VNVNTECQIAFANATR	C7:+57.02146 - V1:+36.0756 - T5:+79.96633	5	5	1	a9.a2.a1	6.1e-07	2	1923.92	1923.92	0.0039	2.02711
a9	a9.a2	pepa9a2b13	41_T4_1b_HCDOT	19569	44.13	VNVNTECQIAFANATR	C7:+57.02146 - V1:+32.0564 - T5:+79.96633	5	5	1	a9.a2.a1	4.5e-07	2	1919.9	1919.9	0.0045	2.34387
a9	a9.a2	pepa9a2b13	14_T2_1a_HCDOT	20287	43.66	VNVNTECQIAFANATR	C7:+57.02146 - V1:+32.0564 - T5:+79.96633	5	5	1	a9.a2.a1	5e-07	2	1919.9	1919.9	0.0022	1.14589
a9	a9.a2	pepa9a2b13	40_T4_1a_HCDOT	19258	43.91	VNVNTECQIAFANATR	C7:+57.02146 - V1:+32.0564 - T5:+79.96633	5	5	1	a9.a2.a1	1.3e-07	2	1919.9	1919.9	0.0055	2.86473
a9	a9.a2	pepa9a2b13	15_T2_1b_HCDOT	20843	43.83	VNVNTECQIAFANATR	C7:+57.02146 - V1:+32.0564 - T5:+79.96633	5	5	1	a9.a2.a1	2.6e-09	2	1919.9	1919.9	0.0022	1.14589
a9	a9.a3	pepa9a3a7	28_T3_1b_HCDOT	26911	55.63	LTEAVPGFPIVLHGGSGIPDDQIQEAIK	K28:+36.0756 - L1:+36.0756 - S16:+79.96633	16	16	1	a9.a3.a1	4.3e-08	3	3053.65	3053.65	0.0005	0.163738
a9	a9.a3	pepa9a3a7	41_T4_1b_HCDOT	27247	55.83	LTEAVPGFPIVLHGGSGIPDDQIQEAIK	K28:+36.0756 - L1:+36.0756 - S16:+79.96633	16	16	1	a9.a3.a1	3.9e-05	3	3053.66	3053.65	0.0082	2.68531
a9	a9.a3	pepa9a3a7	27_T3_1a_HCDOT	26979	55.43	LTEAVPGFPIVLHGGSGIPDDQIQEAIK	K28:+36.0756 - L1:+36.0756 - S16:+79.96633	16	16	1	a9.a3.a1	8.1e-10	3	3053.65	3053.65	-0.0026	-0.851439
a9	a9.a3	pepa9a3a7	14_T2_1a_HCDOT	28026	55.21	LTEAVPGFPIVLHGGSGIPDDQIQEAIK	K28:+36.0756 - L1:+36.0756 - S16:+79.96633	16	16	1	a9.a3.a1	1.3e-09	3	3053.66	3053.65	0.0032	1.04793
b10	b10.a1	pepb10a1a6	01_T1_1a_HCDOT	28163	54.81	VQGAFFNSGQYQMIFGTGTVNK	K22:+36.0756 - V1:+36.0756 - M13:+15.99491 - S8:+79.96633	8	8 11	1	b10.a1.a1	1.3e-05	3	2562.27	2562.27	0.0029	1.13181
b10	b10.a1	pepb10a1a6	02_T1_1b_HCDOT	29445	55.13	VQGAFFNSGQYQMIFGTGTVNK	K22:+36.0756 - V1:+36.0756 - M13:+15.99491 - S8:+79.96633	8	8 11	1	b10.a1.a1	3.1e-07	3	2562.27	2562.27	0.0063	2.45876
b10	b10.a1	pepb10a1a4	01_T1_1a_HCDOT	28242	54.93	VQGAFFNSGQYQMIFGTGTVNK	K22:+28.0313 - V1:+28.0313 - M13:+15.99491 - S8:+79.96633	8	8	1	b10.a1.a1	9.1e-09	3	2546.18	2546.18	0.0051	2.003
b10	b10.a1	pepb10a1a2	28_T3_1b_HCDOT	27366	56.33	VQGAFFNSGQYQMIFGTGTVNK	K22:+28.0313 - V1:+28.0313 - T17:+79.96633	17	8 11 17	1	b10.a1.a1	1.7e-09	3	2530.19	2530.18	0.0026	1.02759
b10	b10.a1	pepb10a1a2	01_T1_1a_HCDOT	30446	58.25	VQGAFFNSGQYQMIFGTGTVNK	K22:+28.0313 - V1:+28.0313 - S8:+79.96633	8	8 11 17	1	b10.a1.a1	9.9e-10	3	2530.19	2530.18	0.0059	2.33185
b10	b10.a1	pepb10a1a2	28_T3_1b_HCDOT	28544	58.13	VQGAFFNSGQYQMIFGTGTVNK	K22:+28.0313 - V1:+28.0313 - S8:+79.96633	8	8 11 17	1	b10.a1.a1	3.4e-10	3	2530.19	2530.18	0.0012	0.474274
b10	b10.a1	pepb10a1a2	15_T2_1b_HCDOT	29147	56.35	VQGAFFNSGQYQMIFGTGTVNK	K22:+28.0313 - V1:+28.0313 - T17:+79.96633	17	8 11 17	1	b10.a1.a1	3.5e-10	3	2530.19	2530.18	0.0024	0.948548
b10	b10.a1	pepb10a1a2	42_T4_2a_HCDOT	24250	58.46	VQGAFFNSGQYQMIFGTGTVNK	K22:+28.0313 - V1:+28.0313 - S8:+79.96633	8	8 11 17	1	b10.a1.a1	1.4e-05	3	2530.19	2530.18	0.0041	1.62044
b10	b10.a1	pepb10a1a2	14_T2_1a_HCDOT	29892	58.01	VQGAFFNSGQYQMIFGTGTVNK	K22:+28.0313 - V1:+28.0313 - S8:+79.96633	8	8 11 17	1	b10.a1.a1	3e-12	2	2530.19	2530.18	0.0025	0.98807
b10	b10.a1	pepb10a1a2	40_T4_1a_HCDOT	28722	58.23	VQGAFFNSGQYQMIFGTGTVNK	K22:+28.0313 - V1:+28.0313 - Y11:+79.96633	11	8 11 17	1	b10.a1.a1	2e-08	2	2530.2	2530.18	0.011	4.34751
b10	b10.a1	pepb10a1a2	01_T1_1a_HCDOT	30538	58.4	VQGAFFNSGQYQMIFGTGTVNK	K22:+28.0313 - V1:+28.0313 - S8:+79.96633	8	8 11 17	1	b10.a1.a1	0.00066	2	2530.19	2530.18	0.0079	3.1223
b10	b10.a1	pepb10a1a2	41_T4_1b_HCDOT	29016	58.51	VQGAFFNSGQYQMIFGTGTVNK	K22:+28.0313 - V1:+28.0313 - S8:+79.96633	8	8 11 17	1	b10.a1.a1	6.7e-09	3	2530.19	2530.18	0.007	2.7666
b10	b10.a1	pepb10a1a2	40_T4_1a_HCDOT	27531	56.43	VQGAFFNSGQYQMIFGTGTVNK	K22:+28.0313 - V1:+28.0313 - T17:+79.96633	17	8 11 17	1	b10.a1.a1	1.3e-10	3	2530.19	2530.18	0.0067	2.64803
b10	b10.a1	pepb10a1a2	01_T1_1a_HCDOT	29282	56.5	VQGAFFNSGQYQMIFGTGTVNK	K22:+28.0313 - V1:+28.0313 - T17:+79.96633	17	8 11 17	1	b10.a1.a1	1.4e-09	3	2530.19	2530.18	0.0079	3.1223
b10	b10.a1	pepb10a1a2	27_T3_1a_HCDOT	28743	58.11	VQGAFFNSGQYQMIFGTGTVNK	K22:+28.0313 - V1:+28.0313 - S8:+79.96633	8	8 11 17	1	b10.a1.a1	0.0002	2	2530.2	2530.18	0.015	5.92842
b10	b10.a1	pepb10a1a2	15_T2_1b_HCDOT	30323	58.13	VQGAFFNSGQYQMIFGTGTVNK	K22:+28.0313 - V1:+28.0313 - S8:+79.96633	8	8 11 17	1	b10.a1.a1	2.8e-10	3	2530.19	2530.18	0.0034	1.34378
b10	b10.a1	pepb10a1a2	27_T3_1a_HCDOT	28683	58.01	VQGAFFNSGQYQMIFGTGTVNK	K22:+28.0313 - V1:+28.0313 - S8:+79.96633	8	8 11 17	1	b10.a1.a1	3.1e-08	3	2530.19	2530.18	0.0024	0.948548
b10	b10.a1	pepb10a1a2	41_T4_1b_HCDOT	27779	56.65	VQGAFFNSGQYQMIFGTGTVNK	K22:+28.0313 - V1:+28.0313 - T17:+79.96633	17	8 11 17	1	b10.a1.a1	8.9e-12	3	2530.19	2530.18	0.0076	3.00373
b10	b10.a1	pepb10a1a5	16_T2_2a_HCDOT	25799	58.06	VQGAFFNSGQYQMIFGTGTVNK	K22:+36.0756 - V1:+36.0756 - S8:+79.96633	8	8 11 17	1	b10.a1.a1	6.9e-05	3	2546.28	2546.27	0.0068	2.67057
b10	b10.a1	pepb10a1a5	28_T3_1b_HCDOT	27435	56.45	VQGAFFNSGQYQMIFGTGTVNK	K22:+36.0756 - V1:+36.0756 - T17:+79.96633	17	8 11 17	1	b10.a1.a1	3.8e-05	3	2546.27	2546.27	-0.0044	-1.72802
b10	b10.a1	pepb10a1a5	15_T2_1b_HCDOT	30337	58.15	VQGAFFNSGQYQMIFGTGTVNK	K22:+36.0756 - V1:+36.0756 - S8:+79.96633	8	8 11 17	1	b10.a1.a1	1e-15	3	2546.28	2546.27	0.0039	1.53165
b10	b10.a1	pepb10a1a5	14_T2_1a_HCDOT	28624	56.1	VQGAFFNSGQYQMIFGTGTVNK	K22:+36.0756 - V1:+36.0756 - T17:+79.96633	17	8 11 17	1	b10.a1.a1	6.3e-08	3	2546.27	2546.27	-0.002	-0.785462
b10	b10.a1	pepb10a1a5	15_T2_1b_HCDOT	29129	56.33	VQGAFFNSGQYQMIFGTGTVNK	K22:+36.0756 - V1:+36.0756 - T17:+79.96633	17	8 11 17	1	b10.a1.a1	3.3e-09	3	2546.27	2546.27	-0.0013	-0.51055
b10	b10.a1	pepb10a1a5	40_T4_1a_HCDOT	27491	56.38	VQGAFFNSGQYQMIFGTGTVNK	K22:+36.0756 - V1:+36.0756 - T17:+79.96633	17	8 11 17	1	b10.a1.a1	0.00029	3	2546.28	2546.27	0.0059	2.31711
b10	b10.a1	pepb10a1a5	42_T4_2a_HCDOT	24241	58.45	VQGAFFNSGQYQMIFGTGTVNK	K22:+36.0756 - V1:+36.0756 - S8:+79.96633	8	8 11 17	1	b10.a1.a1	2.4e-11	3	2546.28	2546.27	0.0026	1.0211
b10	b10.a1	pepb10a1a5	03_T1_2a_HCDOT	27592	58.55	VQGAFFNSGQYQMIFGTGTVNK	K22:+36.0756 - V1:+36.0756 - S8:+79.96633	8	8 11 17	1	b10.a1.a1	2.2e-06	3	2546.27	2546.27	0	0
b10	b10.a1	pepb10a1a5	41_T4_1b_HCDOT	28986	58.46	VQGAFFNSGQYQMIFGTGTVNK	K22:+36.0756 - V1:+36.0756 - S8:+79.96633	8	8 11 17	1	b10.a1.a1	3.3e-08	3	2546.28	2546.27	0.0066	2.59202
b10	b10.a1	pepb10a1a5	02_T1_1b_HCDOT	30447	56.66	VQGAFFNSGQYQMIFGTGTVNK	K22:+36.0756 - V1:+36.0756 - T17:+79.96633	17	8 11 17	1	b10.a1.a1	3.1e-09	3	2546.28	2546.27	0.0042	1.64947
b10	b10.a1	pepb10a1a5	03_T1_2a_HCDOT	27570	58.51	VQGAFFNSGQYQMIFGTGTVNK	K22:+36.0756 - V1:+36.0756 - Y11:+79.96633	11	8 11 17	1	b10.a1.a1	5.3e-07	3	2546.28	2546.27	0.0059	2.31711
b10	b10.a1	pepb10a1a5	14_T2_1a_HCDOT	30041	58.23	VQGAFFNSGQYQMIFGTGTVNK	K22:+36.0756 - V1:+36.0756 - S8:+79.96633	8	8 11 17	1	b10.a1.a1	2.8e-11	3	2546.27	2546.27	-0.0003	-0.117819
b10	b10.a1	pepb10a1a5	27_T3_1a_HCDOT	28670	58	VQGAFFNSGQYQMIFGTGTVNK	K22:+36.0756 - V1:+36.0756 - S8:+79.96633	8	8 11 17	1	b10.a1.a1	1e-15	3	2546.28	2546.27	0.0046	1.80656
b10	b10.a1	pepb10a1a5	01_T1_1a_HCDOT	29296	56.51	VQGAFFNSGQYQMIFGTGTVNK	K22:+36.0756 - V1:+36.0756 - T17:+79.96633	17	8 11 17	1	b10.a1.a1	2.9e-06	3	2546.28	2546.27	0.0053	2.08147
b10	b10.a1	pepb10a1a3	14_T2_1a_HCDOT	28664	56.16	VQGAFFNSGQYQMIFGTGTVNK	K22:+32.0564 - V1:+32.0564 - T17:+79.96633	17	8 17	1	b10.a1.a1	6.2e-15	3	2538.23	2538.23	-0.0004	-0.15759
b10	b10.a1	pepb10a1a3	01_T1_1a_HCDOT	30614	58.51	VQGAFFNSGQYQMIFGTGTVNK	K22:+32.0564 - V1:+32.0564 - S8:+79.96633	8	8 17	1	b10.a1.a1	2.8e-07	3	2538.24	2538.23	0.0008	0.31518
b10	b10.a1	pepb10a1a3	15_T2_1b_HCDOT	29156	56.36	VQGAFFNSGQYQMIFGTGTVNK	K22:+32.0564 - V1:+32.0564 - T17:+79.96633	17	8 17	1	b10.a1.a1	2.4e-11	3	2538.24	2538.23	0.001	0.393975
b10	b10.a1	pepb10a1a3	27_T3_1a_HCDOT	28713	58.06	VQGAFFNSGQYQMIFGTGTVNK	K22:+32.0564 - V1:+32.0564 - S8:+79.96633	8	8 17	1	b10.a1.a1	5.8e-12	3	2538.23	2538.23	0.0005	0.196987
b10	b10.a1	pepb10a1a3	28_T3_1b_HCDOT	28566	58.18	VQGAFFNSGQYQMIFGTGTVNK	K22:+32.0564 - V1:+32.0564 - S8:+79.96633	8	8 17	1	b10.a1.a1	1.7e-10	3	2538.23	2538.23	0.0005	0.196987
b10	b10.a1	pepb10a1a3	27_T3_1a_HCDOT	28737	58.1	VQGAFFNSGQYQMIFGTGTVNK	K22:+32.0564 - V1:+32.0564 - S8:+79.96633	8	8 17	1	b10.a1.a1	4.2e-10	2	2538.24	2538.23	0.0048	1.89108
b10	b10.a1	pepb10a1a3	28_T3_1b_HCDOT	28571	58.18	VQGAFFNSGQYQMIFGTGTVNK	K22:+32.0564 - V1:+32.0564 - S8:+79.96633	8	8 17	1	b10.a1.a1	7e-05	2	2538.21	2538.23	-0.021	-8.27347
b10	b10.a1	pepb10a1a3	15_T2_1b_HCDOT	30322	58.13	VQGAFFNSGQYQMIFGTGTVNK	K22:+32.0564 - V1:+32.0564 - S8:+79.96633	8	8 17	1	b10.a1.a1	3.9e-11	3	2538.24	2538.23	0.0058	2.28505
b10	b10.a2	pepb10a2a1	14_T2_1a_HCDOT	15266	36	PLNAIITAAMTAQAGATLAVGVK	K23:+28.0313 - P1:+28.0313 - M10:+15.99491 - T17:+79.96633	17	17	1	b10.a2.a1	0.00066	3	2334.27	2334.25	0.017	7.28285
b11	b11.a1	pepb11a1a4	02_T1_1b_HCDOT	15692	34.53	TASGFVLAGASHETTK	K16:+36.0756 - T1:+36.0756 - S11:+79.96633	11	3 11	1	b11.a1.a1	2.4e-11	2	1728.92	1728.91	0.0042	2.42927
b11	b11.a1	pepb11a1a4	27_T3_1a_HCDOT	13299	34.35	TASGFVLAGASHETTK	K16:+36.0756 - T1:+36.0756 - S11:+79.96633	11	3 11	1	b11.a1.a1	0.00038	3	1728.91	1728.91	-0.0007	-0.404878
b11	b11.a1	pepb11a1a4	02_T1_1b_HCDOT	16200	35.28	TASGFVLAGASHETTK	K16:+36.0756 - T1:+36.0756 - S3:+79.96633	3	3 11	1	b11.a1.a1	2e-06	2	1728.92	1728.91	0.0061	3.52823
b11	b11.a1	pepb11a1a4	14_T2_1a_HCDOT	14021	34.13	TASGFVLAGASHETTK	K16:+36.0756 - T1:+36.0756 - S11:+79.96633	11	3 11	1	b11.a1.a1	1.9e-08	2	1728.92	1728.91	0.0009	0.520558
b11	b11.a1	pepb11a1a4	01_T1_1a_HCDOT	14318	34.26	TASGFVLAGASHETTK	K16:+36.0756 - T1:+36.0756 - S11:+79.96633	11	3 11	1	b11.a1.a1	0.00015	3	1728.92	1728.91	0.0013	0.751917
b11	b11.a1	pepb11a1a4	14_T2_1a_HCDOT	13972	34.06	TASGFVLAGASHETTK	K16:+36.0756 - T1:+36.0756 - S11:+79.96633	11	3 11	1	b11.a1.a1	1.8e-05	3	1728.91	1728.91	-0.0027	-1.56167
b11	b11.a1	pepb11a1a4	01_T1_1a_HCDOT	14361	34.33	TASGFVLAGASHETTK	K16:+36.0756 - T1:+36.0756 - S11:+79.96633	11	3 11	1	b11.a1.a1	1.2e-09	2	1728.91	1728.91	-0.0009	-0.520558
b11	b11.a1	pepb11a1a3	41_T4_1b_HCDOT	13557	34.6	TASGFVLAGASHETTK	K16:+32.0564 - T1:+32.0564 - S11:+79.96633	11	3 11 14 15	1	b11.a1.a1	2.9e-11	3	1720.88	1720.88	0.0051	2.96361
b11	b11.a1	pepb11a1a3	27_T3_1a_HCDOT	13284	34.31	TASGFVLAGASHETTK	K16:+32.0564 - T1:+32.0564 - S11:+79.96633	11	3 11 14 15	1	b11.a1.a1	0.00021	3	1720.88	1720.88	0.0025	1.45275
b11	b11.a1	pepb11a1a3	40_T4_1a_HCDOT	13130	34.23	TASGFVLAGASHETTK	K16:+32.0564 - T1:+32.0564 - S11:+79.96633	11	3 11 14 15	1	b11.a1.a1	0.00058	3	1720.88	1720.88	0.0047	2.73117
b11	b11.a1	pepb11a1a3	27_T3_1a_HCDOT	13724	35	TASGFVLAGASHETTK	K16:+32.0564 - T1:+32.0564 - S3:+79.96633	3	3 11 14 15	1	b11.a1.a1	4.3e-12	2	1720.88	1720.88	0.0034	1.97574
b11	b11.a1	pepb11a1a3	14_T2_1a_HCDOT	13997	34.1	TASGFVLAGASHETTK	K16:+32.0564 - T1:+32.0564 - S11:+79.96633	11	3 11 14 15	1	b11.a1.a1	5e-12	2	1720.88	1720.88	0.0008	0.464879
b11	b11.a1	pepb11a1a3	14_T2_1a_HCDOT	14488	34.81	TASGFVLAGASHETTK	K16:+32.0564 - T1:+32.0564 - S3:+79.96633	3	3 11 14 15	1	b11.a1.a1	3.5e-13	2	1720.88	1720.88	0.0047	2.73117
b11	b11.a1	pepb11a1a3	01_T1_1a_HCDOT	14344	34.3	TASGFVLAGASHETTK	K16:+32.0564 - T1:+32.0564 - S11:+79.96633	11	3 11 14 15	1	b11.a1.a1	4.7e-09	3	1720.88	1720.88	0.0001	0.0581099
b11	b11.a1	pepb11a1a3	41_T4_1b_HCDOT	14015	35.33	TASGFVLAGASHETTK	K16:+32.0564 - T1:+32.0564 - S3:+79.96633	3	3 11 14 15	1	b11.a1.a1	1.2e-12	2	1720.88	1720.88	0.0043	2.49873
b11	b11.a1	pepb11a1a3	28_T3_1b_HCDOT	13367	34.43	TASGFVLAGASHETTK	K16:+32.0564 - T1:+32.0564 - S11:+79.96633	11	3 11 14 15	1	b11.a1.a1	0.00049	3	1720.87	1720.88	-0.0013	-0.755429
b11	b11.a1	pepb11a1a3	15_T2_1b_HCDOT	14796	34.35	TASGFVLAGASHETTK	K16:+32.0564 - T1:+32.0564 - T14:+79.96633	14	3 11 14 15	1	b11.a1.a1	1.9e-05	2	1720.88	1720.88	-0.0002	-0.11622
b11	b11.a1	pepb11a1a3	01_T1_1a_HCDOT	14360	34.31	TASGFVLAGASHETTK	K16:+32.0564 - T1:+32.0564 - S11:+79.96633	11	3 11 14 15	1	b11.a1.a1	7.7e-07	2	1720.88	1720.88	0.0003	0.17433
b11	b11.a1	pepb11a1a3	15_T2_1b_HCDOT	15247	35.05	TASGFVLAGASHETTK	K16:+32.0564 - T1:+32.0564 - S3:+79.96633	3	3 11 14 15	1	b11.a1.a1	1.4e-11	2	1720.88	1720.88	0.0041	2.38251
b11	b11.a1	pepb11a1a3	02_T1_1b_HCDOT	16203	35.28	TASGFVLAGASHETTK	K16:+32.0564 - T1:+32.0564 - S3:+79.96633	3	3 11 14 15	1	b11.a1.a1	1e-15	2	1720.88	1720.88	0.0008	0.464879
b11	b11.a1	pepb11a1a3	14_T2_1a_HCDOT	13966	34.05	TASGFVLAGASHETTK	K16:+32.0564 - T1:+32.0564 - S11:+79.96633	11	3 11 14 15	1	b11.a1.a1	5.1e-08	3	1720.88	1720.88	0.0012	0.697319
b11	b11.a1	pepb11a1a3	40_T4_1a_HCDOT	13533	34.86	TASGFVLAGASHETTK	K16:+32.0564 - T1:+32.0564 - S3:+79.96633	3	3 11 14 15	1	b11.a1.a1	1.4e-14	2	1720.88	1720.88	0.0078	4.53257
b11	b11.a1	pepb11a1a3	02_T1_1b_HCDOT	15704	34.55	TASGFVLAGASHETTK	K16:+32.0564 - T1:+32.0564 - S11:+79.96633	11	3 11 14 15	1	b11.a1.a1	8.4e-06	3	1720.88	1720.88	0.0029	1.68519
b11	b11.a1	pepb11a1a3	40_T4_1a_HCDOT	13066	34.13	TASGFVLAGASHETTK	K16:+32.0564 - T1:+32.0564 - S11:+79.96633	11	3 11 14 15	1	b11.a1.a1	1.1e-05	3	1720.88	1720.88	0.0031	1.80141
b11	b11.a1	pepb11a1a3	15_T2_1b_HCDOT	14792	34.35	TASGFVLAGASHETTK	K16:+32.0564 - T1:+32.0564 - S11:+79.96633	11	3 11 14 15	1	b11.a1.a1	2.5e-05	3	1720.88	1720.88	0.0007	0.40677
b11	b11.a1	pepb11a1a3	01_T1_1a_HCDOT	14858	35.05	TASGFVLAGASHETTK	K16:+32.0564 - T1:+32.0564 - S3:+79.96633	3	3 11 14 15	1	b11.a1.a1	6.4e-14	2	1720.88	1720.88	0.0039	2.26629
b11	b11.a1	pepb11a1a2	27_T3_1a_HCDOT	13826	35.16	TASGFVLAGASHETTK	K16:+28.0313 - T1:+28.0313 - S3:+79.96633	3	3	1	b11.a1.a1	3.1e-10	2	1712.83	1712.83	0.0032	1.86826
b11	b11.a1	pepb11a1a2	40_T4_1a_HCDOT	13496	34.8	TASGFVLAGASHETTK	K16:+28.0313 - T1:+28.0313 - S3:+79.96633	3	3	1	b11.a1.a1	3.9e-09	2	1712.83	1712.83	0.0046	2.68562
b11	b11.a1	pepb11a1a2	28_T3_1b_HCDOT	13798	35.11	TASGFVLAGASHETTK	K16:+28.0313 - T1:+28.0313 - S3:+79.96633	3	3	1	b11.a1.a1	3.7e-07	2	1712.83	1712.83	0.0025	1.45958
b11	b11.a1	pepb11a1a2	01_T1_1a_HCDOT	14861	35.05	TASGFVLAGASHETTK	K16:+28.0313 - T1:+28.0313 - S3:+79.96633	3	3	1	b11.a1.a1	6.4e-10	2	1712.83	1712.83	0.0019	1.10928
b11	b11.a1	pepb11a1a2	41_T4_1b_HCDOT	13976	35.28	TASGFVLAGASHETTK	K16:+28.0313 - T1:+28.0313 - S3:+79.96633	3	3	1	b11.a1.a1	1.7e-08	2	1712.83	1712.83	0.0062	3.61975
b11	b11.a1	pepb11a1a2	15_T2_1b_HCDOT	15197	34.96	TASGFVLAGASHETTK	K16:+28.0313 - T1:+28.0313 - S3:+79.96633	3	3	1	b11.a1.a1	1.2e-07	2	1712.83	1712.83	0.003	1.75149
b11	b11.a1	pepb11a1a2	02_T1_1b_HCDOT	16186	35.26	TASGFVLAGASHETTK	K16:+28.0313 - T1:+28.0313 - S3:+79.96633	3	3	1	b11.a1.a1	3.6e-07	2	1712.83	1712.83	0.004	2.33532
b11	b11.a1	pepb11a1a1	14_T2_1a_HCDOT	16164	37.36	GASHETTKTAEVLAVGEGTR	K8:+28.0313 - G1:+28.0313 - T6:+79.96633	6	3 6 7 9	1	b11.a1.a1	8.2e-06	3	2150.03	2150.05	-0.02	-9.30211
b11	b11.a2	pepb11a2a5	01_T1_1a_HCDOT	23696	48.11	TLTGELIAPSVAVGDK	K16:+32.0564 - T1:+32.0564 - S10:+79.96633	10	10	1	b11.a2.a1	8.5e-08	2	1714.95	1714.95	0.0025	1.45777
b11	b11.a2	pepb11a2a6	14_T2_1a_HCDOT	23097	47.86	TLTGELIAPSVAVGDK	K16:+36.0756 - T1:+36.0756 - S10:+79.96633	10	10	1	b11.a2.a1	2e-07	2	1722.99	1722.99	0.0039	2.26351
b12	b12.a1	pepb12a1a7	03_T1_2a_HCDOT	15003	37.58	DYASIDAAPEER	D1:+36.0756 - S4:+79.96633	4	4	1	b12.a1.a1	5e-10	2	1452.65	1452.64	0.0031	2.13404
b12	b12.a1	pepb12a1a7	01_T1_1a_HCDOT	16507	37.45	DYASIDAAPEER	D1:+36.0756 - S4:+79.96633	4	4	1	b12.a1.a1	5.8e-11	2	1452.65	1452.64	0.0024	1.65216
b12	b12.a1	pepb12a1a7	15_T2_1b_HCDOT	16598	37.18	DYASIDAAPEER	D1:+36.0756 - S4:+79.96633	4	4	1	b12.a1.a1	1.8e-07	2	1452.64	1452.64	-0.0018	-1.23912
b12	b12.a1	pepb12a1a7	14_T2_1a_HCDOT	16082	37.23	DYASIDAAPEER	D1:+36.0756 - S4:+79.96633	4	4	1	b12.a1.a1	1.3e-09	2	1452.64	1452.64	0.0002	0.13768
b12	b12.a1	pepb12a1a6	17_T2_2b_HCDOT	13760	37.36	DYASIDAAPEER	D1:+32.0564 - S4:+79.96633	4	2 4	1	b12.a1.a1	2.7e-07	2	1448.63	1448.62	0.0014	0.966434
b12	b12.a1	pepb12a1a6	01_T1_1a_HCDOT	16531	37.48	DYASIDAAPEER	D1:+32.0564 - S4:+79.96633	4	2 4	1	b12.a1.a1	5.3e-12	2	1448.63	1448.62	0.0023	1.58771
b12	b12.a1	pepb12a1a6	04_T1_2b_HCDOT	14422	37.6	DYASIDAAPEER	D1:+32.0564 - S4:+79.96633	4	2 4	1	b12.a1.a1	1.5e-06	2	1448.63	1448.62	0.0038	2.62318
b12	b12.a1	pepb12a1a6	41_T4_1b_HCDOT	13469	34.46	DYASIDAAPEER	D1:+32.0564 - Y2:+79.96633	2	2 4	1	b12.a1.a1	1.5e-11	2	1448.63	1448.62	0.0014	0.966434
b12	b12.a1	pepb12a1a6	03_T1_2a_HCDOT	15021	37.61	DYASIDAAPEER	D1:+32.0564 - S4:+79.96633	4	2 4	1	b12.a1.a1	6.1e-08	2	1448.63	1448.62	0.0033	2.27802
b12	b12.a1	pepb12a1a6	42_T4_2a_HCDOT	12274	37.61	DYASIDAAPEER	D1:+32.0564 - S4:+79.96633	4	2 4	1	b12.a1.a1	3.6e-07	2	1448.63	1448.62	0.0027	1.86384
b12	b12.a1	pepb12a1a5	03_T1_2a_HCDOT	15063	37.68	DYASIDAAPEER	D1:+28.0313 - S4:+79.96633	4	4	1	b12.a1.a1	6.1e-05	2	1444.6	1444.6	0.0024	1.66136
b12	b12.a1	pepb12a1a5	04_T1_2b_HCDOT	14441	37.63	DYASIDAAPEER	D1:+28.0313 - S4:+79.96633	4	4	1	b12.a1.a1	0.00067	2	1444.6	1444.6	0.0026	1.79981
b12	b12.a1	pepb12a1a5	17_T2_2b_HCDOT	13776	37.38	DYASIDAAPEER	D1:+28.0313 - S4:+79.96633	4	4	1	b12.a1.a1	0.00015	2	1444.6	1444.6	0.0021	1.45369
b12	b12.a1	pepb12a1a5	30_T3_2b_HCDOT	12147	37.56	DYASIDAAPEER	D1:+28.0313 - S4:+79.96633	4	4	1	b12.a1.a1	2.6e-05	2	1444.6	1444.6	0.0013	0.899903
b12	b12.a1	pepb12a1b10	07_T1_4a_HCDOT	17652	46.41	VNTPKDYASIDAAPEER	K5:+36.0756 - V1:+36.0756 - T3:+79.96633 - Y7:+79.96633	3 7	3 7	1	b12.a1.a1	0.00014	3	2107.99	2107.99	-0.0057	-2.70399
b12	b12.a2	pepb12a2a2	27_T3_1a_HCDOT	31719	62.6	DLLSEYDFPGDDIPVIQGSALK	K22:+32.0564 - D1:+32.0564 - Y6:+79.96633	6	4 6 19	1	b12.a2.a1	9.8e-06	3	2536.27	2536.27	0.0034	1.34055
b12	b12.a2	pepb12a2a2	40_T4_1a_HCDOT	31677	62.63	DLLSEYDFPGDDIPVIQGSALK	K22:+32.0564 - D1:+32.0564 - Y6:+79.96633	6	4 6 19	1	b12.a2.a1	1.7e-06	3	2536.27	2536.27	-0.0053	-2.08968
b12	b12.a2	pepb12a2a2	28_T3_1b_HCDOT	31455	62.6	DLLSEYDFPGDDIPVIQGSALK	K22:+32.0564 - D1:+32.0564 - Y6:+79.96633	6	4 6 19	1	b12.a2.a1	0.00014	3	2536.27	2536.27	0.0023	0.906843
b12	b12.a2	pepb12a2a2	28_T3_1b_HCDOT	31451	62.6	DLLSEYDFPGDDIPVIQGSALK	K22:+32.0564 - D1:+32.0564 - Y6:+79.96633	6	4 6 19	1	b12.a2.a1	6.3e-10	2	2536.27	2536.27	0.0021	0.827987
b12	b12.a2	pepb12a2a2	14_T2_1a_HCDOT	32992	62.65	DLLSEYDFPGDDIPVIQGSALK	K22:+32.0564 - D1:+32.0564 - S19:+79.96633	19	4 6 19	1	b12.a2.a1	1.5e-05	3	2536.28	2536.27	0.0043	1.6954
b12	b12.a2	pepb12a2a2	40_T4_1a_HCDOT	31676	62.63	DLLSEYDFPGDDIPVIQGSALK	K22:+32.0564 - D1:+32.0564 - Y6:+79.96633	6	4 6 19	1	b12.a2.a1	5.8e-09	2	2536.28	2536.27	0.0043	1.6954
b12	b12.a2	pepb12a2a2	02_T1_1b_HCDOT	34424	62.66	DLLSEYDFPGDDIPVIQGSALK	K22:+32.0564 - D1:+32.0564 - Y6:+79.96633	6	4 6 19	1	b12.a2.a1	1.8e-11	3	2536.28	2536.27	0.0077	3.03595
b12	b12.a2	pepb12a2a2	27_T3_1a_HCDOT	31701	62.58	DLLSEYDFPGDDIPVIQGSALK	K22:+32.0564 - D1:+32.0564 - Y6:+79.96633	6	4 6 19	1	b12.a2.a1	2.6e-06	3	2536.28	2536.27	0.0043	1.6954
b12	b12.a2	pepb12a2a2	41_T4_1b_HCDOT	31753	62.6	DLLSEYDFPGDDIPVIQGSALK	K22:+32.0564 - D1:+32.0564 - Y6:+79.96633	6	4 6 19	1	b12.a2.a1	1.2e-11	2	2536.28	2536.27	0.0043	1.6954
b12	b12.a2	pepb12a2a2	01_T1_1a_HCDOT	33448	62.73	DLLSEYDFPGDDIPVIQGSALK	K22:+32.0564 - D1:+32.0564 - Y6:+79.96633	6	4 6 19	1	b12.a2.a1	2.7e-06	3	2536.27	2536.27	0.0032	1.26169
b12	b12.a2	pepb12a2a3	02_T1_1b_HCDOT	34443	62.68	DLLSEYDFPGDDIPVIQGSALK	K22:+36.0756 - D1:+36.0756 - Y6:+79.96633	6	6	1	b12.a2.a1	9e-07	3	2544.32	2544.31	0.0058	2.2796
b12	b12.a2	pepb12a2a3	15_T2_1b_HCDOT	33290	62.6	DLLSEYDFPGDDIPVIQGSALK	K22:+36.0756 - D1:+36.0756 - Y6:+79.96633	6	6	1	b12.a2.a1	2.4e-13	3	2544.31	2544.31	0.0027	1.06119
b12	b12.a2	pepb12a2a1	28_T3_1b_HCDOT	31477	62.63	DLLSEYDFPGDDIPVIQGSALK	K22:+28.0313 - D1:+28.0313 - S19:+79.96633	19	6 19	1	b12.a2.a1	0.00012	2	2528.22	2528.22	-0.0051	-2.01723
b12	b12.a2	pepb12a2a1	14_T2_1a_HCDOT	32993	62.65	DLLSEYDFPGDDIPVIQGSALK	K22:+28.0313 - D1:+28.0313 - Y6:+79.96633	6	6 19	1	b12.a2.a1	1.3e-07	2	2528.23	2528.22	0.0096	3.79714
b12	b12.a3	pepb12a3a4	01_T1_1a_HCDOT	31983	60.56	DTDKPLLLPVEDVFSITGR	K4:+36.0756 - D1:+36.0756 - T17:+79.96633	17	15 17	1	b12.a3.a1	2.6e-09	3	2267.26	2267.25	0.0041	1.80836
b12	b12.a3	pepb12a3a4	02_T1_1b_HCDOT	33075	60.66	DTDKPLLLPVEDVFSITGR	K4:+36.0756 - D1:+36.0756 - S15:+79.96633	15	15 17	1	b12.a3.a1	4.2e-09	3	2267.25	2267.25	0.0023	1.01444
b12	b12.a4	pepb12a4a8	01_T1_1a_HCDOT	16111	36.86	GITINTAHVEYETEK	K15:+32.0564 - G1:+32.0564 - T3:+79.96633	3	3	1	b12.a4.a1	1.9e-05	2	1848.93	1848.92	0.0021	1.1358
b12	b12.a5	pepb12a5a9	41_T4_1b_HCDOT	24902	52.26	VDHGKTTLTAAITTVLAR	K5:+28.0313 - V1:+28.0313 - T6:+79.96633 - V1:+42.01056	6	6	1	b12.a5.a1	6.7e-05	3	2046.08	2046.1	-0.016	-7.81976
b13	b13.a1	pepb13a1a4	14_T2_1a_HCDOT	27689	54.71	SKITTSLLQEMVQAAATR	K2:+28.0313 - S1:+28.0313 - T4:+79.96633	4	1 4 5 6	1	b13.a1.a1	7.4e-10	3	2084.09	2084.08	0.0026	1.24755
b13	b13.a1	pepb13a1a4	28_T3_1b_HCDOT	26634	55.2	SKITTSLLQEMVQAAATR	K2:+28.0313 - S1:+28.0313 - T5:+79.96633	5	1 4 5 6	1	b13.a1.a1	1.2e-07	3	2084.08	2084.08	0.0012	0.575793
b13	b13.a1	pepb13a1a4	02_T1_1b_HCDOT	29667	55.48	SKITTSLLQEMVQAAATR	K2:+28.0313 - S1:+28.0313 - S6:+79.96633	6	1 4 5 6	1	b13.a1.a1	1.7e-08	3	2084.09	2084.08	0.0046	2.20721
b13	b13.a1	pepb13a1a4	40_T4_1a_HCDOT	26676	55.15	SKITTSLLQEMVQAAATR	K2:+28.0313 - S1:+28.0313 - S1:+79.96633	1	1 4 5 6	1	b13.a1.a1	6.1e-09	3	2084.09	2084.08	0.0032	1.53545
b13	b13.a1	pepb13a1a4	27_T3_1a_HCDOT	26654	54.95	SKITTSLLQEMVQAAATR	K2:+28.0313 - S1:+28.0313 - S1:+79.96633	1	1 4 5 6	1	b13.a1.a1	1.5e-07	3	2084.09	2084.08	0.0052	2.4951
b13	b13.a1	pepb13a1a4	01_T1_1a_HCDOT	28262	54.96	SKITTSLLQEMVQAAATR	K2:+28.0313 - S1:+28.0313 - S1:+79.96633	1	1 4 5 6	1	b13.a1.a1	1.7e-07	3	2084.09	2084.08	0.0028	1.34352
b13	b13.a1	pepb13a1a4	15_T2_1b_HCDOT	28331	55.13	SKITTSLLQEMVQAAATR	K2:+28.0313 - S1:+28.0313 - T5:+79.96633	5	1 4 5 6	1	b13.a1.a1	1.9e-08	3	2084.08	2084.08	-0.0001	-0.0479827
b13	b13.a1	pepb13a1a3	28_T3_1b_HCDOT	30168	60.65	ITTSLLQEMVQAAATR	I1:+36.0756 - S4:+79.96633	4	2 3 4	1	b13.a1.a1	2e-09	2	1848.97	1848.97	0.0009	0.486758
b13	b13.a1	pepb13a1a3	02_T1_1b_HCDOT	33207	60.85	ITTSLLQEMVQAAATR	I1:+36.0756 - T3:+79.96633	3	2 3 4	1	b13.a1.a1	4.9e-08	2	1848.97	1848.97	0.0029	1.56844
b13	b13.a1	pepb13a1a3	27_T3_1a_HCDOT	30402	60.65	ITTSLLQEMVQAAATR	I1:+36.0756 - S4:+79.96633	4	2 3 4	1	b13.a1.a1	1.2e-10	2	1848.97	1848.97	0.0024	1.29802
b13	b13.a1	pepb13a1a3	01_T1_1a_HCDOT	32092	60.73	ITTSLLQEMVQAAATR	I1:+36.0756 - S4:+79.96633	4	2 3 4	1	b13.a1.a1	1.3e-08	3	1848.97	1848.97	0.0024	1.29802
b13	b13.a1	pepb13a1a3	14_T2_1a_HCDOT	31622	60.61	ITTSLLQEMVQAAATR	I1:+36.0756 - S4:+79.96633	4	2 3 4	1	b13.a1.a1	1.7e-10	2	1848.97	1848.97	0.0026	1.40619
b13	b13.a1	pepb13a1a3	02_T1_1b_HCDOT	33174	60.8	ITTSLLQEMVQAAATR	I1:+36.0756 - T2:+79.96633	2	2 3 4	1	b13.a1.a1	1.2e-09	3	1848.97	1848.97	0.0032	1.73069
b13	b13.a1	pepb13a1a2	02_T1_1b_HCDOT	33239	60.9	ITTSLLQEMVQAAATR	I1:+32.0564 - T3:+79.96633	3	2 3 4	1	b13.a1.a1	0.00035	2	1844.95	1844.95	0.0055	2.98111
b13	b13.a1	pepb13a1a2	15_T2_1b_HCDOT	32028	60.7	ITTSLLQEMVQAAATR	I1:+32.0564 - S4:+79.96633	4	2 3 4	1	b13.a1.a1	7.3e-11	2	1844.95	1844.95	0.0044	2.38489
b13	b13.a1	pepb13a1a2	40_T4_1a_HCDOT	30377	60.71	ITTSLLQEMVQAAATR	I1:+32.0564 - T3:+79.96633	3	2 3 4	1	b13.a1.a1	1.9e-10	2	1844.95	1844.95	0.0052	2.81851
b13	b13.a1	pepb13a1a2	01_T1_1a_HCDOT	32125	60.78	ITTSLLQEMVQAAATR	I1:+32.0564 - T3:+79.96633	3	2 3 4	1	b13.a1.a1	1.6e-08	3	1844.95	1844.95	0.0008	0.433616
b13	b13.a1	pepb13a1a2	41_T4_1b_HCDOT	30551	60.81	ITTSLLQEMVQAAATR	I1:+32.0564 - S4:+79.96633	4	2 3 4	1	b13.a1.a1	4.1e-12	2	1844.95	1844.95	0.0055	2.98111
b13	b13.a1	pepb13a1a2	14_T2_1a_HCDOT	31670	60.68	ITTSLLQEMVQAAATR	I1:+32.0564 - S4:+79.96633	4	2 3 4	1	b13.a1.a1	1.6e-08	2	1844.95	1844.95	0.0031	1.68026
b13	b13.a1	pepb13a1a6	28_T3_1b_HCDOT	26656	55.23	SKITTSLLQEMVQAAATR	K2:+36.0756 - S1:+36.0756 - T5:+79.96633	5	1 4 5 6	1	b13.a1.a1	1.7e-09	3	2100.17	2100.17	-0.0003	-0.142846
b13	b13.a1	pepb13a1a6	41_T4_1b_HCDOT	27149	55.68	SKITTSLLQEMVQAAATR	K2:+36.0756 - S1:+36.0756 - S6:+79.96633	6	1 4 5 6	1	b13.a1.a1	5.2e-07	3	2100.18	2100.17	0.0075	3.57114
b13	b13.a1	pepb13a1a6	15_T2_1b_HCDOT	28318	55.11	SKITTSLLQEMVQAAATR	K2:+36.0756 - S1:+36.0756 - S6:+79.96633	6	1 4 5 6	1	b13.a1.a1	3.5e-08	2	2100.17	2100.17	-0.0014	-0.666612
b13	b13.a1	pepb13a1a1	41_T4_1b_HCDOT	30567	60.83	ITTSLLQEMVQAAATR	I1:+28.0313 - S4:+79.96633	4	3 4	1	b13.a1.a1	1e-09	2	1840.93	1840.92	0.0044	2.3901
b13	b13.a1	pepb13a1a1	28_T3_1b_HCDOT	30189	60.68	ITTSLLQEMVQAAATR	I1:+28.0313 - S4:+79.96633	4	3 4	1	b13.a1.a1	4.6e-11	2	1840.93	1840.92	0.004	2.17282
b13	b13.a1	pepb13a1a1	15_T2_1b_HCDOT	32079	60.76	ITTSLLQEMVQAAATR	I1:+28.0313 - T3:+79.96633	3	3 4	1	b13.a1.a1	7.4e-06	2	1840.93	1840.92	0.0024	1.30369
b13	b13.a1	pepb13a1a1	27_T3_1a_HCDOT	30430	60.68	ITTSLLQEMVQAAATR	I1:+28.0313 - S4:+79.96633	4	3 4	1	b13.a1.a1	8.5e-11	2	1840.93	1840.92	0.0012	0.651846
b13	b13.a1	pepb13a1a1	40_T4_1a_HCDOT	30398	60.75	ITTSLLQEMVQAAATR	I1:+28.0313 - S4:+79.96633	4	3 4	1	b13.a1.a1	4.7e-12	2	1840.93	1840.92	0.0048	2.60739
b13	b13.a1	pepb13a1a5	40_T4_1a_HCDOT	26683	55.15	SKITTSLLQEMVQAAATR	K2:+32.0564 - S1:+32.0564 - T4:+79.96633	4	1 4	1	b13.a1.a1	5.9e-07	3	2092.14	2092.13	0.0096	4.58862
b13	b13.a1	pepb13a1a5	40_T4_1a_HCDOT	26666	55.13	SKITTSLLQEMVQAAATR	K2:+32.0564 - S1:+32.0564 - S1:+79.96633	1	1 4	1	b13.a1.a1	3.7e-09	3	2092.14	2092.13	0.006	2.86789
b13	b13.a1	pepb13a1a5	27_T3_1a_HCDOT	26610	54.86	SKITTSLLQEMVQAAATR	K2:+32.0564 - S1:+32.0564 - S1:+79.96633	1	1 4	1	b13.a1.a1	3.8e-07	3	2092.14	2092.13	0.0034	1.62514
b14	b14.a1	pepb14a1a8	15_T2_1b_HCDOT	25490	50.85	SGETEDSTIADIAVATNAGQIK	K22:+36.0756 - S1:+36.0756 - T8:+79.96633	8	1 4 7 8	1	b14.a1.a1	6.3e-05	3	2343.19	2343.19	0.0011	0.469445
b14	b14.a1	pepb14a1a8	41_T4_1b_HCDOT	24305	51.38	SGETEDSTIADIAVATNAGQIK	K22:+36.0756 - S1:+36.0756 - S1:+79.96633	1	1 4 7 8	1	b14.a1.a1	0.00055	2	2343.17	2343.19	-0.021	-8.96214
b14	b14.a1	pepb14a1a8	02_T1_1b_HCDOT	26802	51.18	SGETEDSTIADIAVATNAGQIK	K22:+36.0756 - S1:+36.0756 - T8:+79.96633	8	1 4 7 8	1	b14.a1.a1	3.8e-06	3	2343.2	2343.19	0.006	2.56061
b14	b14.a1	pepb14a1a6	40_T4_1a_HCDOT	23950	51.05	SGETEDSTIADIAVATNAGQIK	K22:+28.0313 - S1:+28.0313 - T8:+79.96633	8	1 4 7 8	1	b14.a1.a1	6.9e-08	3	2327.11	2327.1	0.0064	2.7502
b14	b14.a1	pepb14a1a6	40_T4_1a_HCDOT	23978	51.1	SGETEDSTIADIAVATNAGQIK	K22:+28.0313 - S1:+28.0313 - S7:+79.96633	7	1 4 7 8	1	b14.a1.a1	1e-15	2	2327.1	2327.1	0.0032	1.3751
b14	b14.a1	pepb14a1a6	41_T4_1b_HCDOT	24147	51.13	SGETEDSTIADIAVATNAGQIK	K22:+28.0313 - S1:+28.0313 - T8:+79.96633	8	1 4 7 8	1	b14.a1.a1	1.7e-06	3	2327.11	2327.1	0.0064	2.7502
b14	b14.a1	pepb14a1a6	15_T2_1b_HCDOT	25543	50.93	SGETEDSTIADIAVATNAGQIK	K22:+28.0313 - S1:+28.0313 - T8:+79.96633	8	1 4 7 8	1	b14.a1.a1	4.4e-09	3	2327.11	2327.1	0.0041	1.76185
b14	b14.a1	pepb14a1a6	02_T1_1b_HCDOT	26899	51.33	SGETEDSTIADIAVATNAGQIK	K22:+28.0313 - S1:+28.0313 - S7:+79.96633	7	1 4 7 8	1	b14.a1.a1	1.9e-06	2	2327.11	2327.1	0.011	4.72691
b14	b14.a1	pepb14a1a6	28_T3_1b_HCDOT	23883	51	SGETEDSTIADIAVATNAGQIK	K22:+28.0313 - S1:+28.0313 - T8:+79.96633	8	1 4 7 8	1	b14.a1.a1	1e-15	2	2327.1	2327.1	-0.0005	-0.21486
b14	b14.a1	pepb14a1a6	15_T2_1b_HCDOT	25523	50.9	SGETEDSTIADIAVATNAGQIK	K22:+28.0313 - S1:+28.0313 - S1:+79.96633	1	1 4 7 8	1	b14.a1.a1	1e-15	2	2327.1	2327.1	-0.0007	-0.300803
b14	b14.a1	pepb14a1a6	27_T3_1a_HCDOT	24006	50.93	SGETEDSTIADIAVATNAGQIK	K22:+28.0313 - S1:+28.0313 - S7:+79.96633	7	1 4 7 8	1	b14.a1.a1	1.7e-14	2	2327.11	2327.1	0.012	5.15663
b14	b14.a1	pepb14a1a6	02_T1_1b_HCDOT	26818	51.21	SGETEDSTIADIAVATNAGQIK	K22:+28.0313 - S1:+28.0313 - T4:+79.96633	4	1 4 7 8	1	b14.a1.a1	1.3e-10	3	2327.1	2327.1	-0.0003	-0.128916
b14	b14.a1	pepb14a1a7	40_T4_1a_HCDOT	24232	51.48	SGETEDSTIADIAVATNAGQIK	K22:+32.0564 - S1:+32.0564 - T4:+79.96633	4	1 4 7 8	1	b14.a1.a1	1e-15	2	2335.16	2335.15	0.0084	3.5972
b14	b14.a1	pepb14a1a7	27_T3_1a_HCDOT	24012	50.95	SGETEDSTIADIAVATNAGQIK	K22:+32.0564 - S1:+32.0564 - T4:+79.96633	4	1 4 7 8	1	b14.a1.a1	1.8e-10	3	2335.16	2335.15	0.0085	3.64002
b14	b14.a1	pepb14a1a7	27_T3_1a_HCDOT	23997	50.91	SGETEDSTIADIAVATNAGQIK	K22:+32.0564 - S1:+32.0564 - S1:+79.96633	1	1 4 7 8	1	b14.a1.a1	1.5e-08	2	2335.15	2335.15	-0.0018	-0.770828
b14	b14.a1	pepb14a1a7	41_T4_1b_HCDOT	24194	51.2	SGETEDSTIADIAVATNAGQIK	K22:+32.0564 - S1:+32.0564 - S1:+79.96633	1	1 4 7 8	1	b14.a1.a1	8.1e-11	2	2335.16	2335.15	0.0048	2.05554
b14	b14.a1	pepb14a1a7	40_T4_1a_HCDOT	23922	51.01	SGETEDSTIADIAVATNAGQIK	K22:+32.0564 - S1:+32.0564 - T8:+79.96633	8	1 4 7 8	1	b14.a1.a1	2.9e-11	3	2335.15	2335.15	0.0021	0.899299
b14	b14.a1	pepb14a1a1	41_T4_1b_HCDOT	24386	51.5	EAGYTAVVSHRSGETEDSTIADIAVATNAGQIK	K33:+36.0756 - E1:+36.0756 - S12:+79.96633	12	9 12	1	b14.a1.a1	8.6e-05	3	3513.77	3513.77	0.003	0.853784
b14	b14.a2	pepb14a2a5	01_T1_1a_HCDOT	20149	42.88	MSIITDVYAR	M1:+36.0756 - M1:+15.99491 - S2:+79.96633	2	2	1	b14.a2.a1	3.4e-05	2	1300.64	1300.64	0.0039	2.99852
b14	b14.a2	pepb14a2a5	02_T1_1b_HCDOT	21391	43.11	MSIITDVYAR	M1:+36.0756 - M1:+15.99491 - S2:+79.96633	2	2	1	b14.a2.a1	2.4e-05	2	1300.64	1300.64	0.0031	2.38344
b14	b14.a2	pepb14a2a5	03_T1_2a_HCDOT	18277	43.28	MSIITDVYAR	M1:+36.0756 - M1:+15.99491 - S2:+79.96633	2	2	1	b14.a2.a1	1.5e-05	2	1300.65	1300.64	0.0052	3.99803
b14	b14.a2	pepb14a2a5	27_T3_1a_HCDOT	18781	42.95	MSIITDVYAR	M1:+36.0756 - M1:+15.99491 - S2:+79.96633	2	2	1	b14.a2.a1	1.5e-07	2	1300.64	1300.64	0.0033	2.53721
b14	b14.a2	pepb14a2a5	04_T1_2b_HCDOT	17612	43.23	MSIITDVYAR	M1:+36.0756 - M1:+15.99491 - S2:+79.96633	2	2	1	b14.a2.a1	8.9e-07	2	1300.64	1300.64	0.0042	3.22918
b14	b14.a2	pepb14a2a5	14_T2_1a_HCDOT	19670	42.73	MSIITDVYAR	M1:+36.0756 - M1:+15.99491 - S2:+79.96633	2	2	1	b14.a2.a1	7.5e-09	2	1300.64	1300.64	0.0041	3.15229
b14	b14.a3	pepb14a3a4	01_T1_1a_HCDOT	15435	35.88	GMVPSGASTGEHEAVELR	G1:+36.0756 - S5:+79.96633	5	5 8 9	1	b14.a3.a1	4.8e-05	2	1942.92	1942.91	0.0031	1.59554
b14	b14.a3	pepb14a3a4	14_T2_1a_HCDOT	15051	35.66	GMVPSGASTGEHEAVELR	G1:+36.0756 - S5:+79.96633	5	5 8 9	1	b14.a3.a1	4.5e-08	2	1942.91	1942.91	0.0021	1.08085
b14	b14.a3	pepb14a3a2	01_T1_1a_HCDOT	15469	35.93	GMVPSGASTGEHEAVELR	G1:+28.0313 - T9:+79.96633	9	5 8 9	1	b14.a3.a1	0.00083	3	1934.87	1934.87	0.0021	1.08535
b14	b14.a3	pepb14a3a3	01_T1_1a_HCDOT	15473	35.93	GMVPSGASTGEHEAVELR	G1:+32.0564 - S8:+79.96633	8	5 8	1	b14.a3.a1	3.7e-06	2	1938.9	1938.89	0.007	3.61031
b14	b14.a3	pepb14a3a3	28_T3_1b_HCDOT	14349	36.01	GMVPSGASTGEHEAVELR	G1:+32.0564 - S5:+79.96633	5	5 8	1	b14.a3.a1	6.7e-05	2	1938.89	1938.89	0.0015	0.773637
b15	b15.a1	pepb15a1a7	27_T3_1a_HCDOT	13116	34.06	YATSVDLDGK	K10:+36.0756 - Y1:+36.0756 - T3:+79.96633	3	1 3	1	b15.a1.a1	9.5e-07	2	1220.64	1220.64	0.0019	1.55656
b15	b15.a1	pepb15a1a7	29_T3_2a_HCDOT	10624	34.28	YATSVDLDGK	K10:+36.0756 - Y1:+36.0756 - T3:+79.96633	3	1 3	1	b15.a1.a1	1.2e-06	2	1220.64	1220.64	0.001	0.819243
b15	b15.a1	pepb15a1a7	04_T1_2b_HCDOT	12603	34.36	YATSVDLDGK	K10:+36.0756 - Y1:+36.0756 - Y1:+79.96633	1	1 3	1	b15.a1.a1	4.7e-07	2	1220.64	1220.64	0.0016	1.31079
b15	b15.a1	pepb15a1a7	30_T3_2b_HCDOT	10387	34.31	YATSVDLDGK	K10:+36.0756 - Y1:+36.0756 - T3:+79.96633	3	1 3	1	b15.a1.a1	4.6e-05	2	1220.64	1220.64	0.0017	1.39271
b15	b15.a1	pepb15a1a7	01_T1_1a_HCDOT	14185	34.06	YATSVDLDGK	K10:+36.0756 - Y1:+36.0756 - T3:+79.96633	3	1 3	1	b15.a1.a1	3.5e-06	2	1220.64	1220.64	0.0013	1.06502
b15	b15.a1	pepb15a1a7	28_T3_1b_HCDOT	13163	34.1	YATSVDLDGK	K10:+36.0756 - Y1:+36.0756 - T3:+79.96633	3	1 3	1	b15.a1.a1	4.1e-05	2	1220.64	1220.64	0.0006	0.491546
b15	b15.a1	pepb15a1a7	03_T1_2a_HCDOT	13190	34.41	YATSVDLDGK	K10:+36.0756 - Y1:+36.0756 - Y1:+79.96633	1	1 3	1	b15.a1.a1	8.7e-06	2	1220.64	1220.64	0.0018	1.47464
b15	b15.a1	pepb15a1a7	02_T1_1b_HCDOT	15465	34.2	YATSVDLDGK	K10:+36.0756 - Y1:+36.0756 - T3:+79.96633	3	1 3	1	b15.a1.a1	9.7e-06	2	1220.64	1220.64	0.0013	1.06502
b15	b15.a1	pepb15a1a5	14_T2_1a_HCDOT	13942	34.01	YATSVDLDGK	K10:+28.0313 - Y1:+28.0313 - T3:+79.96633	3	3	1	b15.a1.a1	0.0006	2	1204.55	1204.55	0.0009	0.747167
b15	b15.a1	pepb15a1a5	03_T1_2a_HCDOT	13226	34.48	YATSVDLDGK	K10:+28.0313 - Y1:+28.0313 - T3:+79.96633	3	3	1	b15.a1.a1	0.00012	2	1204.55	1204.55	0.0037	3.07169
b15	b15.a1	pepb15a1a5	16_T2_2a_HCDOT	12311	34.21	YATSVDLDGK	K10:+28.0313 - Y1:+28.0313 - T3:+79.96633	3	3	1	b15.a1.a1	0.00046	2	1204.55	1204.55	0.0019	1.57735
b15	b15.a1	pepb15a1a5	04_T1_2b_HCDOT	12619	34.4	YATSVDLDGK	K10:+28.0313 - Y1:+28.0313 - T3:+79.96633	3	3	1	b15.a1.a1	0.00018	2	1204.55	1204.55	0.0037	3.07169
b15	b15.a1	pepb15a1a5	27_T3_1a_HCDOT	13187	34.18	YATSVDLDGK	K10:+28.0313 - Y1:+28.0313 - T3:+79.96633	3	3	1	b15.a1.a1	0.00078	2	1204.55	1204.55	0.0022	1.82641
b15	b15.a1	pepb15a1a5	17_T2_2b_HCDOT	12040	34.26	YATSVDLDGK	K10:+28.0313 - Y1:+28.0313 - T3:+79.96633	3	3	1	b15.a1.a1	0.00029	2	1204.55	1204.55	0.0018	1.49433
b15	b15.a1	pepb15a1a5	40_T4_1a_HCDOT	13065	34.13	YATSVDLDGK	K10:+28.0313 - Y1:+28.0313 - T3:+79.96633	3	3	1	b15.a1.a1	0.00014	2	1204.55	1204.55	0.0026	2.15848
b15	b15.a1	pepb15a1a5	28_T3_1b_HCDOT	13219	34.2	YATSVDLDGK	K10:+28.0313 - Y1:+28.0313 - T3:+79.96633	3	3	1	b15.a1.a1	0.00013	2	1204.55	1204.55	0.0012	0.996223
b15	b15.a1	pepb15a1a5	01_T1_1a_HCDOT	14248	34.16	YATSVDLDGK	K10:+28.0313 - Y1:+28.0313 - T3:+79.96633	3	3	1	b15.a1.a1	9.3e-07	2	1204.55	1204.55	0.002	1.66037
b15	b15.a1	pepb15a1a1	02_T1_1b_HCDOT	24805	48.18	DIQQEALEKYATSVDLDGK	K9:+28.0313 - K19:+28.0313 - D1:+28.0313 - Y10:+79.96633	10	10 12	1	b15.a1.a1	0.00013	3	2287.11	2287.11	0.004	1.74893
b15	b15.a1	pepb15a1a6	43_T4_2b_HCDOT	10393	34.33	YATSVDLDGK	K10:+32.0564 - Y1:+32.0564 - T3:+79.96633	3	3	1	b15.a1.a1	7.9e-07	2	1212.6	1212.6	0.002	1.64935
b15	b15.a1	pepb15a1a6	17_T2_2b_HCDOT	12065	34.3	YATSVDLDGK	K10:+32.0564 - Y1:+32.0564 - T3:+79.96633	3	3	1	b15.a1.a1	0.00019	2	1212.6	1212.6	0.002	1.64935
b15	b15.a1	pepb15a1a6	14_T2_1a_HCDOT	13939	34.01	YATSVDLDGK	K10:+32.0564 - Y1:+32.0564 - T3:+79.96633	3	3	1	b15.a1.a1	1.7e-05	2	1212.6	1212.6	0.0007	0.577272
b15	b15.a1	pepb15a1a6	16_T2_2a_HCDOT	12338	34.26	YATSVDLDGK	K10:+32.0564 - Y1:+32.0564 - T3:+79.96633	3	3	1	b15.a1.a1	0.00023	2	1212.6	1212.6	0.0018	1.48441
b15	b15.a1	pepb15a1a2	27_T3_1a_HCDOT	21950	47.8	DIQQEALEKYATSVDLDGK	K9:+36.0756 - K19:+36.0756 - D1:+36.0756 - T12:+79.96633	12	12	1	b15.a1.a1	7.4e-07	3	2311.25	2311.24	0.0049	2.12007
b15	b15.a2	pepb15a2a4	01_T1_1a_HCDOT	13216	32.63	KEDILDTKVPMSR	K1:+36.0756 - K8:+36.0756 - K1:+36.0756 - T7:+79.96633	7	7	1	b15.a2.a1	0.00064	2	1720.01	1720.01	0.0008	0.465114
b15	b15.a2	pepb15a2a4	02_T1_1b_HCDOT	14635	32.96	KEDILDTKVPMSR	K1:+36.0756 - K8:+36.0756 - K1:+36.0756 - T7:+79.96633	7	7	1	b15.a2.a1	0.00053	2	1720.01	1720.01	0.0016	0.930228
b15	b15.a2	pepb15a2a3	14_T2_1a_HCDOT	12893	32.45	KEDILDTKVPMSR	K1:+32.0564 - K8:+32.0564 - K1:+32.0564 - T7:+79.96633	7	7	1	b15.a2.a1	2.4e-05	2	1707.95	1707.95	0.0013	0.761146
b16	b16.a1	pepb16a1a4	29_T3_2a_HCDOT	8753	30.31	GFTDETVR	G1:+36.0756 - T6:+79.96633	6	6	1	b16.a1.a1	0.00031	2	1040.48	1040.48	0.0005	0.480545
b16	b16.a1	pepb16a1a4	27_T3_1a_HCDOT	10614	30.11	GFTDETVR	G1:+36.0756 - T6:+79.96633	6	6	1	b16.a1.a1	0.00031	2	1040.49	1040.48	0.0009	0.864982
b16	b16.a1	pepb16a1a4	03_T1_2a_HCDOT	10969	30.36	GFTDETVR	G1:+36.0756 - T6:+79.96633	6	6	1	b16.a1.a1	0.00092	2	1040.49	1040.48	0.0015	1.44164
b16	b16.a1	pepb16a1a4	30_T3_2b_HCDOT	8376	30.3	GFTDETVR	G1:+36.0756 - T6:+79.96633	6	6	1	b16.a1.a1	0.00017	2	1040.49	1040.48	0.001	0.961091
b16	b16.a1	pepb16a1a4	04_T1_2b_HCDOT	10399	30.36	GFTDETVR	G1:+36.0756 - T6:+79.96633	6	6	1	b16.a1.a1	0.00022	2	1040.49	1040.48	0.0019	1.82607
b16	b16.a1	pepb16a1a4	01_T1_1a_HCDOT	11486	30.05	GFTDETVR	G1:+36.0756 - T6:+79.96633	6	6	1	b16.a1.a1	0.00038	2	1040.49	1040.48	0.0007	0.672763
b16	b16.a1	pepb16a1a2	04_T1_2b_HCDOT	10407	30.38	GFTDETVR	G1:+28.0313 - T6:+79.96633	6	6	1	b16.a1.a1	5.5e-07	2	1032.44	1032.44	0.0017	1.64658
b16	b16.a1	pepb16a1a2	01_T1_1a_HCDOT	11509	30.08	GFTDETVR	G1:+28.0313 - T6:+79.96633	6	6	1	b16.a1.a1	2.9e-05	2	1032.44	1032.44	0.001	0.968579
b16	b16.a1	pepb16a1a2	03_T1_2a_HCDOT	10979	30.38	GFTDETVR	G1:+28.0313 - T6:+79.96633	6	6	1	b16.a1.a1	0.0009	2	1032.44	1032.44	0.0019	1.8403
b16	b16.a1	pepb16a1a6	01_T1_1a_HCDOT	18977	41.15	GFTDETVRFNLNDGDK	K16:+36.0756 - G1:+36.0756 - T6:+79.96633	6	6	1	b16.a1.a1	4.5e-05	3	1979.97	1979.97	0.0047	2.37377
b16	b16.a1	pepb16a1a6	02_T1_1b_HCDOT	20288	41.45	GFTDETVRFNLNDGDK	K16:+36.0756 - G1:+36.0756 - T6:+79.96633	6	6	1	b16.a1.a1	2.8e-06	3	1979.97	1979.97	0.0018	0.909105
b16	b16.a1	pepb16a1a1	41_T4_1b_HCDOT	28291	57.43	FTDETVRFNLNDGDKNEISNTLTNVYR	K15:+36.0756 - F1:+36.0756 - T2:+79.96633 - T5:+79.96633	2 5	2 5	1	b16.a1.a1	2.9e-06	3	3407.62	3407.61	0.0021	0.616267
b16	b16.a1	pepb16a1a1	01_T1_1a_HCDOT	29652	57.05	FTDETVRFNLNDGDKNEISNTLTNVYR	K15:+36.0756 - F1:+36.0756 - T2:+79.96633 - T5:+79.96633	2 5	2 5	1	b16.a1.a1	8.9e-14	3	3407.61	3407.61	-0.0019	-0.557575
b16	b16.a1	pepb16a1a1	02_T1_1b_HCDOT	31061	57.6	FTDETVRFNLNDGDKNEISNTLTNVYR	K15:+36.0756 - F1:+36.0756 - T2:+79.96633 - T5:+79.96633	2 5	2 5	1	b16.a1.a1	0.0009	3	3407.61	3407.61	0.0003	0.0880382
b16	b16.a1	pepb16a1a7	02_T1_1b_HCDOT	25018	48.5	GFTDETVRFNLNDGDKNEISNTLTNVYR	K16:+36.0756 - G1:+36.0756 - T6:+79.96633	6	3 6	1	b16.a1.a1	3e-06	3	3384.68	3384.67	0.0093	2.74768
b16	b16.a1	pepb16a1a7	27_T3_1a_HCDOT	22087	48.01	GFTDETVRFNLNDGDKNEISNTLTNVYR	K16:+36.0756 - G1:+36.0756 - T3:+79.96633	3	3 6	1	b16.a1.a1	5.8e-06	3	3384.67	3384.67	0.002	0.5909
b16	b16.a1	pepb16a1a7	28_T3_1b_HCDOT	23019	49.66	GFTDETVRFNLNDGDKNEISNTLTNVYR	K16:+36.0756 - G1:+36.0756 - T6:+79.96633	6	3 6	1	b16.a1.a1	0.00011	3	3384.67	3384.67	0.0039	1.15225
b16	b16.a1	pepb16a1a3	14_T2_1a_HCDOT	11205	29.86	GFTDETVR	G1:+32.0564 - T6:+79.96633	6	6	1	b16.a1.a1	0.00064	2	1036.47	1036.47	0.0009	0.868336
b16	b16.a1	pepb16a1a3	16_T2_2a_HCDOT	10261	30.23	GFTDETVR	G1:+32.0564 - T6:+79.96633	6	6	1	b16.a1.a1	9.2e-05	2	1036.47	1036.47	0.0009	0.868336
b16	b16.a1	pepb16a1a5	14_T2_1a_HCDOT	18549	41.01	GFTDETVRFNLNDGDK	K16:+32.0564 - G1:+32.0564 - T6:+79.96633	6	6	1	b16.a1.a1	0.0004	3	1971.93	1971.93	0.0015	0.760676
b16	b16.a1	pepb16a1a5	15_T2_1b_HCDOT	19150	41.16	GFTDETVRFNLNDGDK	K16:+32.0564 - G1:+32.0564 - T6:+79.96633	6	6	1	b16.a1.a1	5.4e-06	3	1971.93	1971.93	0.0024	1.21708
b16	b16.a1	pepb16a1a5	14_T2_1a_HCDOT	18488	40.91	GFTDETVRFNLNDGDK	K16:+32.0564 - G1:+32.0564 - T6:+79.96633	6	6	1	b16.a1.a1	4.6e-11	2	1971.93	1971.93	-0.0002	-0.101423
b16	b16.a1	pepb16a1a8	15_T2_1b_HCDOT	29526	56.93	GFTDETVRFNLNDGDKNEISNTLTNVYR	K16:+32.0564 - G1:+32.0564 - T6:+79.96633 - G1:+42.01057	6	3 6	1	b16.a1.a1	2.9e-08	3	3418.67	3418.64	0.029	8.4829
b17	b17.a1	pepb17a1a5	15_T2_1b_HCDOT	16432	36.91	DFHIVAETGIHAR	D1:+36.0756 - T8:+79.96633	8	8	1	b17.a1.a1	5.8e-05	2	1581.8	1581.8	0.0004	0.252877
b17	b17.a1	pepb17a1a5	28_T3_1b_HCDOT	15005	37.06	DFHIVAETGIHAR	D1:+36.0756 - T8:+79.96633	8	8	1	b17.a1.a1	0.00073	3	1581.8	1581.8	0.0026	1.6437
b17	b17.a1	pepb17a1a5	01_T1_1a_HCDOT	15977	36.66	DFHIVAETGIHAR	D1:+36.0756 - T8:+79.96633	8	8	1	b17.a1.a1	0.0007	3	1581.8	1581.8	0.0019	1.20117
b17	b17.a1	pepb17a1a5	01_T1_1a_HCDOT	15982	36.68	DFHIVAETGIHAR	D1:+36.0756 - T8:+79.96633	8	8	1	b17.a1.a1	0.00069	2	1581.8	1581.8	0.001	0.632192
b17	b17.a1	pepb17a1a5	41_T4_1b_HCDOT	15843	38.25	DFHIVAETGIHAR	D1:+36.0756 - T8:+79.96633	8	8	1	b17.a1.a1	0.00099	3	1581.8	1581.8	0.0022	1.39082
b17	b17.a1	pepb17a1a5	27_T3_1a_HCDOT	14927	36.9	DFHIVAETGIHAR	D1:+36.0756 - T8:+79.96633	8	8	1	b17.a1.a1	2e-05	2	1581.8	1581.8	0.0035	2.21267
b17	b17.a1	pepb17a1a5	27_T3_1a_HCDOT	14892	36.85	DFHIVAETGIHAR	D1:+36.0756 - T8:+79.96633	8	8	1	b17.a1.a1	0.00024	3	1581.8	1581.8	0.0039	2.46555
b17	b17.a1	pepb17a1a5	14_T2_1a_HCDOT	15584	36.48	DFHIVAETGIHAR	D1:+36.0756 - T8:+79.96633	8	8	1	b17.a1.a1	4.4e-05	3	1581.8	1581.8	0.0008	0.505754
b17	b17.a1	pepb17a1a5	14_T2_1a_HCDOT	15597	36.5	DFHIVAETGIHAR	D1:+36.0756 - T8:+79.96633	8	8	1	b17.a1.a1	0.00049	2	1581.8	1581.8	0.0027	1.70692
b17	b17.a1	pepb17a1a5	02_T1_1b_HCDOT	17417	37.11	DFHIVAETGIHAR	D1:+36.0756 - T8:+79.96633	8	8	1	b17.a1.a1	4.5e-05	2	1581.8	1581.8	0.0026	1.6437
b17	b17.a1	pepb17a1a5	28_T3_1b_HCDOT	15070	37.18	DFHIVAETGIHAR	D1:+36.0756 - T8:+79.96633	8	8	1	b17.a1.a1	8.6e-05	2	1581.8	1581.8	0.0007	0.442535
b17	b17.a1	pepb17a1a5	27_T3_1a_HCDOT	15356	37.56	DFHIVAETGIHAR	D1:+36.0756 - T8:+79.96633	8	8	1	b17.a1.a1	0.00028	3	1581.8	1581.8	0.0042	2.65521
b17	b17.a1	pepb17a1a4	02_T1_1b_HCDOT	17495	37.23	DFHIVAETGIHAR	D1:+32.0564 - T8:+79.96633	8	8	1	b17.a1.a1	0.00044	3	1577.78	1577.78	0.0028	1.77465
b17	b17.a1	pepb17a1a4	02_T1_1b_HCDOT	17496	37.23	DFHIVAETGIHAR	D1:+32.0564 - T8:+79.96633	8	8	1	b17.a1.a1	2.9e-05	2	1577.78	1577.78	0.0022	1.39437
b17	b17.a1	pepb17a1a4	01_T1_1a_HCDOT	16070	36.81	DFHIVAETGIHAR	D1:+32.0564 - T8:+79.96633	8	8	1	b17.a1.a1	1.5e-05	2	1577.78	1577.78	0.0025	1.58451
b17	b17.a1	pepb17a1a4	15_T2_1b_HCDOT	16532	37.08	DFHIVAETGIHAR	D1:+32.0564 - T8:+79.96633	8	8	1	b17.a1.a1	0.0003	3	1577.78	1577.78	0.0012	0.760563
b17	b17.a1	pepb17a1a4	15_T2_1b_HCDOT	16444	36.93	DFHIVAETGIHAR	D1:+32.0564 - T8:+79.96633	8	8	1	b17.a1.a1	4.7e-07	2	1577.78	1577.78	0.0013	0.823944
b17	b17.a1	pepb17a1a4	01_T1_1a_HCDOT	16069	36.81	DFHIVAETGIHAR	D1:+32.0564 - T8:+79.96633	8	8	1	b17.a1.a1	9.8e-05	3	1577.78	1577.78	0.003	1.90141
b17	b17.a1	pepb17a1a3	28_T3_1b_HCDOT	15201	37.38	DFHIVAETGIHAR	D1:+28.0313 - T8:+79.96633	8	8	1	b17.a1.a1	0.00019	3	1573.75	1573.75	0.002	1.27085
b17	b17.a2	pepb17a2a7	02_T1_1b_HCDOT	34852	63.3	SIMGVMSLGVGQGADVTISAEGPDADDAIAAIAETMTK	K38:+36.0756 - S1:+36.0756 - T17:+79.96633	17	17 19	1	b17.a2.a1	2.5e-05	3	3844.91	3844.89	0.018	4.68154
b17	b17.a2	pepb17a2a1	14_T2_1a_HCDOT	29203	56.98	AVNLKSIMGVM	K5:+28.0313 - A1:+28.0313 - S6:+79.96633	6	6	1	b17.a2.a1	0.00032	2	1298.66	1298.66	0.0007	0.539016
b17	b17.a2	pepb17a2a2	17_T2_2b_HCDOT	28309	62.91	AVNLKSIMGVMSLGVGQGADVTISAEGPDADDAIAAIAETMTK	K5:+28.0313 - K43:+28.0313 - A1:+28.0313 - S6:+79.96633	6	6	1	b17.a2.a1	1.2e-06	3	4382.17	4382.16	0.012	2.73838
b17	b17.a3	pepb17a3a6	41_T4_1b_HCDOT	22458	48.55	FASDITLEYK	K10:+32.0564 - F1:+32.0564 - S3:+79.96633	3	3	1	b17.a3.a1	0.00021	2	1330.69	1330.68	0.0068	5.11017
b18	b18.a1	pepb18a1a6	01_T1_1a_HCDOT	28444	55.23	EASILELNDLVK	K12:+36.0756 - E1:+36.0756 - S3:+79.96633	3	3	1	b18.a1.a1	2.5e-08	2	1495.86	1495.86	0.0038	2.54035
b18	b18.a1	pepb18a1a6	15_T2_1b_HCDOT	28276	55.05	EASILELNDLVK	K12:+36.0756 - E1:+36.0756 - S3:+79.96633	3	3	1	b18.a1.a1	4.3e-10	2	1495.86	1495.86	0.0024	1.60443
b18	b18.a1	pepb18a1a5	01_T1_1a_HCDOT	28449	55.25	EASILELNDLVK	K12:+32.0564 - E1:+32.0564 - S3:+79.96633	3	3	1	b18.a1.a1	9.8e-07	2	1487.82	1487.82	0.0022	1.47867
b18	b18.a1	pepb18a1a5	14_T2_1a_HCDOT	27867	54.98	EASILELNDLVK	K12:+32.0564 - E1:+32.0564 - S3:+79.96633	3	3	1	b18.a1.a1	1.8e-05	2	1487.82	1487.82	0.0001	0.0672124
b18	b18.a1	pepb18a1a5	41_T4_1b_HCDOT	26949	55.38	EASILELNDLVK	K12:+32.0564 - E1:+32.0564 - S3:+79.96633	3	3	1	b18.a1.a1	2e-09	2	1487.82	1487.82	-0.0011	-0.739336
b18	b18.a1	pepb18a1a5	40_T4_1a_HCDOT	26737	55.23	EASILELNDLVK	K12:+32.0564 - E1:+32.0564 - S3:+79.96633	3	3	1	b18.a1.a1	2e-11	2	1487.83	1487.82	0.0046	3.09177
b18	b18.a1	pepb18a1a5	28_T3_1b_HCDOT	26596	55.13	EASILELNDLVK	K12:+32.0564 - E1:+32.0564 - S3:+79.96633	3	3	1	b18.a1.a1	4.5e-06	2	1487.82	1487.82	0.0016	1.0754
b18	b18.a1	pepb18a1a5	27_T3_1a_HCDOT	26726	55.05	EASILELNDLVK	K12:+32.0564 - E1:+32.0564 - S3:+79.96633	3	3	1	b18.a1.a1	2.7e-08	2	1487.82	1487.82	0.0021	1.41146
b18	b18.a1	pepb18a1a5	02_T1_1b_HCDOT	29609	55.38	EASILELNDLVK	K12:+32.0564 - E1:+32.0564 - S3:+79.96633	3	3	1	b18.a1.a1	3.4e-06	2	1487.82	1487.82	0.0029	1.94916
b18	b18.a1	pepb18a1a5	43_T4_2b_HCDOT	22099	55.36	EASILELNDLVK	K12:+32.0564 - E1:+32.0564 - S3:+79.96633	3	3	1	b18.a1.a1	1.6e-07	2	1487.83	1487.82	0.004	2.6885
b18	b18.a2	pepb18a2a8	01_T1_1a_HCDOT	15463	35.93	EGVSAAEAEEIK	K12:+36.0756 - E1:+36.0756 - S4:+79.96633	4	4	1	b18.a2.a1	6e-09	2	1384.72	1384.72	0.0021	1.51655
b18	b18.a2	pepb18a2a8	14_T2_1a_HCDOT	15083	35.71	EGVSAAEAEEIK	K12:+36.0756 - E1:+36.0756 - S4:+79.96633	4	4	1	b18.a2.a1	4.3e-07	2	1384.72	1384.72	-0.0001	-0.0722168
b18	b18.a2	pepb18a2a8	15_T2_1b_HCDOT	15753	35.85	EGVSAAEAEEIK	K12:+36.0756 - E1:+36.0756 - S4:+79.96633	4	4	1	b18.a2.a1	0.0003	2	1384.72	1384.72	0	0
b18	b18.a2	pepb18a2a8	02_T1_1b_HCDOT	16676	36	EGVSAAEAEEIK	K12:+36.0756 - E1:+36.0756 - S4:+79.96633	4	4	1	b18.a2.a1	1.8e-07	2	1384.72	1384.72	0.003	2.16651
b18	b18.a2	pepb18a2a1	01_T1_1a_HCDOT	18804	40.88	AIVDGAPSVIK	K11:+32.0564 - A1:+32.0564 - S8:+79.96633	8	8	1	b18.a2.a1	1.9e-06	2	1213.71	1213.7	0.0017	1.40067
b18	b18.a2	pepb18a2a2	14_T2_1a_HCDOT	23475	48.45	AIVDGAPSVIKEGVSAAEAEEIK	K11:+28.0313 - K23:+28.0313 - A1:+28.0313 - S8:+79.96633	8	8 15	1	b18.a2.a1	0.0001	3	2447.27	2447.27	0.0007	0.286033
b18	b18.a2	pepb18a2a7	40_T4_1a_HCDOT	14149	35.85	EGVSAAEAEEIK	K12:+32.0564 - E1:+32.0564 - S4:+79.96633	4	4	1	b18.a2.a1	9.3e-10	2	1376.68	1376.68	0.0038	2.76026
b18	b18.a3	pepb18a3a4	01_T1_1a_HCDOT	22014	45.65	DSFDVELTSAGDK	K13:+36.0756 - D1:+36.0756 - T8:+79.96633	8	8 9	1	b18.a3.a1	0.00027	2	1535.74	1535.75	-0.0007	-0.455805
b18	b18.a3	pepb18a3a4	14_T2_1a_HCDOT	21518	45.51	DSFDVELTSAGDK	K13:+36.0756 - D1:+36.0756 - T8:+79.96633	8	8 9	1	b18.a3.a1	0.00028	2	1535.74	1535.75	-0.0008	-0.52092
b18	b18.a3	pepb18a3a3	01_T1_1a_HCDOT	22054	45.71	DSFDVELTSAGDK	K13:+32.0564 - D1:+32.0564 - S9:+79.96633	9	2 9	1	b18.a3.a1	7.7e-08	2	1527.71	1527.71	0.0023	1.50552
b18	b18.a3	pepb18a3a3	02_T1_1b_HCDOT	23477	46.23	DSFDVELTSAGDK	K13:+32.0564 - D1:+32.0564 - S2:+79.96633	2	2 9	1	b18.a3.a1	7.4e-10	2	1527.71	1527.71	0.0016	1.04732
b19	b19.a1	pepb19a1a4	14_T2_1a_HCDOT	15390	36.18	VTPQPNRIPVENTVEVPQPVDGENHEQK	K28:+28.0313 - V1:+28.0313 - T13:+79.96633	13	13	1	b19.a1.a1	3.2e-05	3	3286.62	3286.61	0.0067	2.03857
b19	b19.a1	pepb19a1a4	40_T4_1a_HCDOT	14436	36.3	VTPQPNRIPVENTVEVPQPVDGENHEQK	K28:+28.0313 - V1:+28.0313 - T13:+79.96633	13	13	1	b19.a1.a1	1.3e-07	3	3286.62	3286.61	0.0071	2.16028
b19	b19.a1	pepb19a1a4	01_T1_1a_HCDOT	15649	36.2	VTPQPNRIPVENTVEVPQPVDGENHEQK	K28:+28.0313 - V1:+28.0313 - T13:+79.96633	13	13	1	b19.a1.a1	1.7e-08	3	3286.61	3286.61	-0.0006	-0.182559
b19	b19.a1	pepb19a1a3	01_T1_1a_HCDOT	15679	36.23	IPVENTVEVPQPVDGENHEQK	K21:+36.0756 - I1:+36.0756 - T6:+79.96633	6	6	1	b19.a1.a1	9.7e-13	3	2510.28	2510.28	0.0047	1.8723
b19	b19.a1	pepb19a1a3	27_T3_1a_HCDOT	14519	36.25	IPVENTVEVPQPVDGENHEQK	K21:+36.0756 - I1:+36.0756 - T6:+79.96633	6	6	1	b19.a1.a1	2.1e-10	3	2510.28	2510.28	0.0067	2.66903
b19	b19.a1	pepb19a1a3	02_T1_1b_HCDOT	16969	36.43	IPVENTVEVPQPVDGENHEQK	K21:+36.0756 - I1:+36.0756 - T6:+79.96633	6	6	1	b19.a1.a1	5.3e-10	3	2510.28	2510.28	0.0058	2.3105
b19	b19.a1	pepb19a1a1	01_T1_1a_HCDOT	15765	36.36	IPVENTVEVPQPVDGENHEQK	K21:+28.0313 - I1:+28.0313 - T6:+79.96633	6	6	1	b19.a1.a1	1e-15	3	2494.19	2494.19	0.0075	3.00699
b19	b19.a1	pepb19a1a1	27_T3_1a_HCDOT	14568	36.33	IPVENTVEVPQPVDGENHEQK	K21:+28.0313 - I1:+28.0313 - T6:+79.96633	6	6	1	b19.a1.a1	1.1e-10	3	2494.19	2494.19	0.002	0.801865
b19	b19.a1	pepb19a1a1	14_T2_1a_HCDOT	15369	36.16	IPVENTVEVPQPVDGENHEQK	K21:+28.0313 - I1:+28.0313 - T6:+79.96633	6	6	1	b19.a1.a1	8.8e-10	3	2494.19	2494.19	0.0012	0.481119
b19	b19.a1	pepb19a1a1	41_T4_1b_HCDOT	14753	36.53	IPVENTVEVPQPVDGENHEQK	K21:+28.0313 - I1:+28.0313 - T6:+79.96633	6	6	1	b19.a1.a1	3.7e-07	3	2494.19	2494.19	-0.0006	-0.240559
b19	b19.a1	pepb19a1a1	40_T4_1a_HCDOT	14569	36.51	IPVENTVEVPQPVDGENHEQK	K21:+28.0313 - I1:+28.0313 - T6:+79.96633	6	6	1	b19.a1.a1	1e-07	3	2494.19	2494.19	0.006	2.40559
b19	b19.a1	pepb19a1a1	15_T2_1b_HCDOT	15988	36.21	IPVENTVEVPQPVDGENHEQK	K21:+28.0313 - I1:+28.0313 - T6:+79.96633	6	6	1	b19.a1.a1	1e-15	3	2494.19	2494.19	-0.0015	-0.601398
b19	b19.a1	pepb19a1a5	40_T4_1a_HCDOT	14490	36.4	VTPQPNRIPVENTVEVPQPVDGENHEQK	K28:+32.0564 - V1:+32.0564 - T13:+79.96633	13	13	1	b19.a1.a1	0.00048	3	3294.67	3294.66	0.0095	2.88345
b19	b19.a1	pepb19a1a5	15_T2_1b_HCDOT	16137	36.45	VTPQPNRIPVENTVEVPQPVDGENHEQK	K28:+32.0564 - V1:+32.0564 - T13:+79.96633	13	13	1	b19.a1.a1	1.9e-09	3	3294.67	3294.66	0.0088	2.67099
b19	b19.a1	pepb19a1a5	14_T2_1a_HCDOT	15284	36.03	VTPQPNRIPVENTVEVPQPVDGENHEQK	K28:+32.0564 - V1:+32.0564 - T13:+79.96633	13	13	1	b19.a1.a1	1.9e-10	3	3294.66	3294.66	0.0022	0.667747
b19	b19.a1	pepb19a1a2	41_T4_1b_HCDOT	14830	36.66	IPVENTVEVPQPVDGENHEQK	K21:+32.0564 - I1:+32.0564 - T6:+79.96633	6	6	1	b19.a1.a1	9.6e-11	3	2502.24	2502.24	0.0066	2.63764
b19	b19.a1	pepb19a1a2	40_T4_1a_HCDOT	14342	36.15	IPVENTVEVPQPVDGENHEQK	K21:+32.0564 - I1:+32.0564 - T6:+79.96633	6	6	1	b19.a1.a1	2.5e-06	3	2502.23	2502.24	-0.0039	-1.55861
b19	b19.a1	pepb19a1a2	15_T2_1b_HCDOT	15939	36.13	IPVENTVEVPQPVDGENHEQK	K21:+32.0564 - I1:+32.0564 - T6:+79.96633	6	6	1	b19.a1.a1	1.7e-08	3	2502.24	2502.24	0.0009	0.359678
b19	b19.a1	pepb19a1a2	14_T2_1a_HCDOT	15296	36.05	IPVENTVEVPQPVDGENHEQK	K21:+32.0564 - I1:+32.0564 - T6:+79.96633	6	6	1	b19.a1.a1	2.8e-15	3	2502.24	2502.24	0.0002	0.0799285
b19	b19.a1	pepb19a1a6	28_T3_1b_HCDOT	14578	36.38	VTPQPNRIPVENTVEVPQPVDGENHEQK	K28:+36.0756 - V1:+36.0756 - T13:+79.96633	13	13	1	b19.a1.a1	7.8e-07	3	3302.71	3302.7	0.008	2.42226
b20	b20.a1	pepb20a1a2	15_T2_1b_HCDOT	26020	51.65	QLINDYEETHASTIAVMPVSSEEVSAYGVIAPQGK	K35:+32.0564 - Q1:+32.0564 - S20:+79.96633	20	20 21	1	b20.a1.a1	1e-15	3	3877.9	3877.91	-0.0095	-2.44978
b20	b20.a1	pepb20a1a2	40_T4_1a_HCDOT	24415	51.75	QLINDYEETHASTIAVMPVSSEEVSAYGVIAPQGK	K35:+32.0564 - Q1:+32.0564 - S20:+79.96633	20	20 21	1	b20.a1.a1	1e-15	3	3877.91	3877.91	0.007	1.8051
b20	b20.a1	pepb20a1a2	28_T3_1b_HCDOT	24445	51.85	QLINDYEETHASTIAVMPVSSEEVSAYGVIAPQGK	K35:+32.0564 - Q1:+32.0564 - S20:+79.96633	20	20 21	1	b20.a1.a1	1e-15	3	3877.91	3877.91	0.0066	1.70195
b20	b20.a1	pepb20a1a2	01_T1_1a_HCDOT	26577	52.43	QLINDYEETHASTIAVMPVSSEEVSAYGVIAPQGK	K35:+32.0564 - Q1:+32.0564 - S21:+79.96633	21	20 21	1	b20.a1.a1	3.6e-09	3	3877.92	3877.91	0.016	4.12594
b20	b20.a1	pepb20a1a2	02_T1_1b_HCDOT	27349	52	QLINDYEETHASTIAVMPVSSEEVSAYGVIAPQGK	K35:+32.0564 - Q1:+32.0564 - S20:+79.96633	20	20 21	1	b20.a1.a1	1e-15	3	3877.9	3877.91	-0.0015	-0.386807
b20	b20.a1	pepb20a1a2	27_T3_1a_HCDOT	24491	51.66	QLINDYEETHASTIAVMPVSSEEVSAYGVIAPQGK	K35:+32.0564 - Q1:+32.0564 - S21:+79.96633	21	20 21	1	b20.a1.a1	1e-15	3	3877.92	3877.91	0.01	2.57871
b20	b20.a1	pepb20a1a5	02_T1_1b_HCDOT	25508	49.25	QLINDYEETHASTIAVMPVSSEEVSAYGVIAPQGK	K35:+36.0756 - Q1:+36.0756 - M17:+15.99491 - S20:+79.96633	20	6 9 12 13 20 21	1	b20.a1.a1	7.3e-05	3	3901.95	3901.94	0.0081	2.07589
b20	b20.a1	pepb20a1a1	15_T2_1b_HCDOT	26024	51.66	QLINDYEETHASTIAVMPVSSEEVSAYGVIAPQGK	K35:+28.0313 - Q1:+28.0313 - S20:+79.96633	20	20 21	1	b20.a1.a1	1e-15	3	3869.88	3869.86	0.02	5.16815
b20	b20.a1	pepb20a1a1	40_T4_1a_HCDOT	24438	51.78	QLINDYEETHASTIAVMPVSSEEVSAYGVIAPQGK	K35:+28.0313 - Q1:+28.0313 - S21:+79.96633	21	20 21	1	b20.a1.a1	1e-15	3	3869.87	3869.86	0.01	2.58408
b20	b20.a1	pepb20a1a1	28_T3_1b_HCDOT	24939	52.58	QLINDYEETHASTIAVMPVSSEEVSAYGVIAPQGK	K35:+28.0313 - Q1:+28.0313 - S20:+79.96633	20	20 21	1	b20.a1.a1	1.2e-09	3	3869.85	3869.86	-0.0086	-2.22231
b20	b20.a1	pepb20a1a1	02_T1_1b_HCDOT	27404	52.08	QLINDYEETHASTIAVMPVSSEEVSAYGVIAPQGK	K35:+28.0313 - Q1:+28.0313 - S20:+79.96633	20	20 21	1	b20.a1.a1	4.2e-15	3	3869.85	3869.86	-0.0042	-1.08531
b20	b20.a1	pepb20a1a1	15_T2_1b_HCDOT	26559	52.46	QLINDYEETHASTIAVMPVSSEEVSAYGVIAPQGK	K35:+28.0313 - Q1:+28.0313 - S20:+79.96633	20	20 21	1	b20.a1.a1	1.2e-12	3	3869.86	3869.86	0.0009	0.232567
b20	b20.a1	pepb20a1a4	02_T1_1b_HCDOT	27518	52.25	QLINDYEETHASTIAVMPVSSEEVSAYGVIAPQGK	K35:+36.0756 - Q1:+36.0756 - S21:+79.96633	21	20 21	1	b20.a1.a1	1e-15	3	3885.96	3885.95	0.019	4.88942
b20	b20.a1	pepb20a1a4	41_T4_1b_HCDOT	25266	52.81	QLINDYEETHASTIAVMPVSSEEVSAYGVIAPQGK	K35:+36.0756 - Q1:+36.0756 - S20:+79.96633	20	20 21	1	b20.a1.a1	9.5e-10	3	3885.95	3885.94	0.0058	1.49256
b20	b20.a1	pepb20a1a4	40_T4_1a_HCDOT	24931	52.51	QLINDYEETHASTIAVMPVSSEEVSAYGVIAPQGK	K35:+36.0756 - Q1:+36.0756 - S21:+79.96633	21	20 21	1	b20.a1.a1	1e-15	3	3885.96	3885.95	0.015	3.86006
b20	b20.a1	pepb20a1a4	28_T3_1b_HCDOT	24827	52.41	QLINDYEETHASTIAVMPVSSEEVSAYGVIAPQGK	K35:+36.0756 - Q1:+36.0756 - S21:+79.96633	21	20 21	1	b20.a1.a1	3.5e-06	3	3885.95	3885.94	0.0073	1.87857
b20	b20.a1	pepb20a1a4	15_T2_1b_HCDOT	26039	51.68	QLINDYEETHASTIAVMPVSSEEVSAYGVIAPQGK	K35:+36.0756 - Q1:+36.0756 - S21:+79.96633	21	20 21	1	b20.a1.a1	1e-15	3	3885.96	3885.95	0.015	3.86006
b20	b20.a1	pepb20a1a4	27_T3_1a_HCDOT	24461	51.61	QLINDYEETHASTIAVMPVSSEEVSAYGVIAPQGK	K35:+36.0756 - Q1:+36.0756 - S21:+79.96633	21	20 21	1	b20.a1.a1	1e-15	3	3885.95	3885.94	0.004	1.02935
b20	b20.a1	pepb20a1a3	14_T2_1a_HCDOT	25469	51.41	QLINDYEETHASTIAVMPVSSEEVSAYGVIAPQGK	K35:+36.0756 - Q1:+36.0756 - M17:+15.99491 - S20:+79.96633 - Q1:-17.02655	20	20 21	1	b20.a1.a1	3.7e-08	3	3884.95	3884.91	0.034	8.75181
b21	b21.a1	pepb21a1a3	02_T1_1b_HCDOT	15846	34.75	NPQTGETISIAASK	K14:+36.0756 - N1:+36.0756 - S9:+79.96633	9	9	1	b21.a1.a1	3.8e-08	2	1568.85	1568.85	0.0034	2.16719
b21	b21.a1	pepb21a1a3	27_T3_1a_HCDOT	13495	34.63	NPQTGETISIAASK	K14:+36.0756 - N1:+36.0756 - S9:+79.96633	9	9	1	b21.a1.a1	1.6e-07	2	1568.85	1568.85	0.0032	2.03971
b21	b21.a1	pepb21a1a3	01_T1_1a_HCDOT	14616	34.68	NPQTGETISIAASK	K14:+36.0756 - N1:+36.0756 - S9:+79.96633	9	9	1	b21.a1.a1	2.9e-08	2	1568.85	1568.85	0.0022	1.4023
b21	b21.a1	pepb21a1a3	14_T2_1a_HCDOT	14321	34.56	NPQTGETISIAASK	K14:+36.0756 - N1:+36.0756 - S9:+79.96633	9	9	1	b21.a1.a1	0.00044	2	1568.85	1568.85	0.0023	1.46604
b21	b21.a1	pepb21a1a3	40_T4_1a_HCDOT	13295	34.46	NPQTGETISIAASK	K14:+36.0756 - N1:+36.0756 - S9:+79.96633	9	9	1	b21.a1.a1	3.2e-09	2	1568.86	1568.85	0.006	3.82446
b21	b21.a1	pepb21a1a1	27_T3_1a_HCDOT	13576	34.76	NPQTGETISIAASK	K14:+28.0313 - N1:+28.0313 - S9:+79.96633	9	9	1	b21.a1.a1	6.7e-06	2	1552.76	1552.76	0.0012	0.772816
b21	b21.a1	pepb21a1a1	28_T3_1b_HCDOT	13540	34.7	NPQTGETISIAASK	K14:+28.0313 - N1:+28.0313 - S9:+79.96633	9	9	1	b21.a1.a1	4.6e-08	2	1552.76	1552.76	0.0009	0.579612
b21	b21.a1	pepb21a1a1	15_T2_1b_HCDOT	14958	34.58	NPQTGETISIAASK	K14:+28.0313 - N1:+28.0313 - S9:+79.96633	9	9	1	b21.a1.a1	1.9e-08	2	1552.76	1552.76	0.0006	0.386408
b21	b21.a1	pepb21a1a1	01_T1_1a_HCDOT	14634	34.71	NPQTGETISIAASK	K14:+28.0313 - N1:+28.0313 - S9:+79.96633	9	9	1	b21.a1.a1	5.6e-08	2	1552.76	1552.76	0.0023	1.48123
b21	b21.a1	pepb21a1a1	14_T2_1a_HCDOT	14273	34.5	NPQTGETISIAASK	K14:+28.0313 - N1:+28.0313 - S9:+79.96633	9	9	1	b21.a1.a1	4.3e-08	2	1552.76	1552.76	0.0015	0.96602
b21	b21.a1	pepb21a1a2	14_T2_1a_HCDOT	14245	34.45	NPQTGETISIAASK	K14:+32.0564 - N1:+32.0564 - S9:+79.96633	9	9	1	b21.a1.a1	4.6e-08	2	1560.81	1560.81	0.0011	0.704761
b21	b21.a1	pepb21a1a2	27_T3_1a_HCDOT	13496	34.63	NPQTGETISIAASK	K14:+32.0564 - N1:+32.0564 - S9:+79.96633	9	9	1	b21.a1.a1	1e-08	2	1560.81	1560.81	0.0023	1.47359
b21	b21.a1	pepb21a1a2	28_T3_1b_HCDOT	13483	34.61	NPQTGETISIAASK	K14:+32.0564 - N1:+32.0564 - S9:+79.96633	9	9	1	b21.a1.a1	3.1e-07	2	1560.81	1560.81	0.0016	1.02511
b21	b21.a1	pepb21a1a2	40_T4_1a_HCDOT	13291	34.46	NPQTGETISIAASK	K14:+32.0564 - N1:+32.0564 - S9:+79.96633	9	9	1	b21.a1.a1	1e-13	2	1560.82	1560.81	0.0035	2.24242
b21	b21.a1	pepb21a1a2	15_T2_1b_HCDOT	14911	34.51	NPQTGETISIAASK	K14:+32.0564 - N1:+32.0564 - S9:+79.96633	9	9	1	b21.a1.a1	5e-08	2	1560.81	1560.81	0.0022	1.40952
b21	b21.a1	pepb21a1a2	02_T1_1b_HCDOT	15874	34.8	NPQTGETISIAASK	K14:+32.0564 - N1:+32.0564 - S9:+79.96633	9	9	1	b21.a1.a1	5.9e-14	2	1560.82	1560.81	0.0034	2.17835
b21	b21.a1	pepb21a1a2	41_T4_1b_HCDOT	13628	34.71	NPQTGETISIAASK	K14:+32.0564 - N1:+32.0564 - S9:+79.96633	9	9	1	b21.a1.a1	1.1e-09	2	1560.81	1560.81	0.0024	1.53766
b22	b22.a1	pepb22a1a6	01_T1_1a_HCDOT	24348	49.11	NLSIPQETEILK	K12:+36.0756 - N1:+36.0756 - T8:+79.96633	8	8	1	b22.a1.a1	0.00019	2	1536.89	1536.89	0.0023	1.49653
b22	b22.a1	pepb22a1a6	27_T3_1a_HCDOT	22772	49.06	NLSIPQETEILK	K12:+36.0756 - N1:+36.0756 - T8:+79.96633	8	8	1	b22.a1.a1	0.00014	2	1536.89	1536.89	0.0035	2.27733
b22	b22.a1	pepb22a1a4	40_T4_1a_HCDOT	22771	49.26	NLSIPQETEILK	K12:+28.0313 - N1:+28.0313 - T8:+79.96633	8	8	1	b22.a1.a1	0.00013	2	1520.8	1520.8	0.0046	3.02473
b22	b22.a1	pepb22a1a4	02_T1_1b_HCDOT	25635	49.43	NLSIPQETEILK	K12:+28.0313 - N1:+28.0313 - T8:+79.96633	8	8	1	b22.a1.a1	2e-06	2	1520.8	1520.8	0.0028	1.84114
b22	b22.a1	pepb22a1a4	01_T1_1a_HCDOT	24398	49.2	NLSIPQETEILK	K12:+28.0313 - N1:+28.0313 - T8:+79.96633	8	8	1	b22.a1.a1	4.7e-06	2	1520.8	1520.8	0.0033	2.16991
b22	b22.a1	pepb22a1a4	15_T2_1b_HCDOT	24277	49.03	NLSIPQETEILK	K12:+28.0313 - N1:+28.0313 - T8:+79.96633	8	8	1	b22.a1.a1	0.0001	2	1520.8	1520.8	0.0018	1.18359
b22	b22.a1	pepb22a1a4	41_T4_1b_HCDOT	23016	49.41	NLSIPQETEILK	K12:+28.0313 - N1:+28.0313 - T8:+79.96633	8	8	1	b22.a1.a1	0.00027	2	1520.8	1520.8	0.0035	2.30142
b22	b22.a1	pepb22a1a4	27_T3_1a_HCDOT	22758	49.03	NLSIPQETEILK	K12:+28.0313 - N1:+28.0313 - T8:+79.96633	8	8	1	b22.a1.a1	5.5e-05	2	1520.8	1520.8	0.0046	3.02473
b22	b22.a1	pepb22a1a5	41_T4_1b_HCDOT	22990	49.38	NLSIPQETEILK	K12:+32.0564 - N1:+32.0564 - T8:+79.96633	8	8	1	b22.a1.a1	3.8e-06	2	1528.85	1528.85	0.0016	1.04654
b22	b22.a1	pepb22a1a5	40_T4_1a_HCDOT	22757	49.25	NLSIPQETEILK	K12:+32.0564 - N1:+32.0564 - T8:+79.96633	8	8	1	b22.a1.a1	0.00099	2	1528.85	1528.85	0.0035	2.28931
b22	b22.a1	pepb22a1a5	15_T2_1b_HCDOT	24229	48.96	NLSIPQETEILK	K12:+32.0564 - N1:+32.0564 - T8:+79.96633	8	8	1	b22.a1.a1	1.9e-05	2	1528.85	1528.85	0.0027	1.76604
b22	b22.a1	pepb22a1a5	14_T2_1a_HCDOT	23729	48.83	NLSIPQETEILK	K12:+32.0564 - N1:+32.0564 - T8:+79.96633	8	8	1	b22.a1.a1	9.1e-05	2	1528.85	1528.85	0.0018	1.17736
b22	b22.a2	pepb22a2a3	01_T1_1a_HCDOT	13908	33.65	HNEYSESAEDSLSFK	K15:+36.0756 - H1:+36.0756 - S11:+79.96633	11	11	1	b22.a2.a1	4.2e-06	2	1894.88	1894.87	0.0067	3.53587
b22	b22.a2	pepb22a2a3	01_T1_1a_HCDOT	13966	33.73	HNEYSESAEDSLSFK	K15:+36.0756 - H1:+36.0756 - S11:+79.96633	11	11	1	b22.a2.a1	0.00032	3	1894.87	1894.87	0.0019	1.00271
b22	b22.a2	pepb22a2a2	14_T2_1a_HCDOT	13554	33.43	HNEYSESAEDSLSFK	K15:+32.0564 - H1:+32.0564 - S11:+79.96633	11	11	1	b22.a2.a1	4.5e-05	2	1886.83	1886.83	0.0026	1.37797
b22	b22.a3	pepb22a3a1	15_T2_1b_HCDOT	11699	29.45	EAIYTNPK	K8:+32.0564 - E1:+32.0564 - Y4:+79.96633	4	4	1	b22.a3.a1	0.00011	2	1079.56	1079.56	0.0011	1.01893
b22	b22.a3	pepb22a3a1	14_T2_1a_HCDOT	10792	29.23	EAIYTNPK	K8:+32.0564 - E1:+32.0564 - Y4:+79.96633	4	4	1	b22.a3.a1	7.1e-05	2	1079.56	1079.56	0.0006	0.555781
b23	b23.a1	pepb23a1a3	14_T2_1a_HCDOT	31473	60.4	LANDEESIMAFVQAMK	K16:+36.0756 - L1:+36.0756 - S7:+79.96633	7	7	1	b23.a1.a1	1.9e-05	3	1948.98	1948.97	0.0036	1.84713
b23	b23.a1	pepb23a1a3	02_T1_1b_HCDOT	32984	60.53	LANDEESIMAFVQAMK	K16:+36.0756 - L1:+36.0756 - S7:+79.96633	7	7	1	b23.a1.a1	3.4e-06	3	1948.98	1948.97	0.002	1.02618
b23	b23.a1	pepb23a1a3	01_T1_1a_HCDOT	31883	60.43	LANDEESIMAFVQAMK	K16:+36.0756 - L1:+36.0756 - S7:+79.96633	7	7	1	b23.a1.a1	1.4e-05	3	1948.98	1948.97	0.0042	2.15498
b23	b23.a1	pepb23a1a3	27_T3_1a_HCDOT	30190	60.33	LANDEESIMAFVQAMK	K16:+36.0756 - L1:+36.0756 - S7:+79.96633	7	7	1	b23.a1.a1	4.4e-07	3	1948.97	1948.97	0.0007	0.359163
b23	b23.a1	pepb23a1a3	15_T2_1b_HCDOT	31838	60.41	LANDEESIMAFVQAMK	K16:+36.0756 - L1:+36.0756 - S7:+79.96633	7	7	1	b23.a1.a1	2.9e-06	3	1948.98	1948.97	0.0027	1.38534
b23	b23.a1	pepb23a1a1	40_T4_1a_HCDOT	30224	60.5	LANDEESIMAFVQAMK	K16:+28.0313 - L1:+28.0313 - S7:+79.96633	7	7	1	b23.a1.a1	2.4e-06	3	1932.89	1932.89	0.004	2.06945
b23	b23.a1	pepb23a1a1	41_T4_1b_HCDOT	30401	60.6	LANDEESIMAFVQAMK	K16:+28.0313 - L1:+28.0313 - S7:+79.96633	7	7	1	b23.a1.a1	0.00023	3	1932.89	1932.89	0.0097	5.0184
b23	b23.a1	pepb23a1a1	14_T2_1a_HCDOT	31403	60.3	LANDEESIMAFVQAMK	K16:+28.0313 - L1:+28.0313 - S7:+79.96633	7	7	1	b23.a1.a1	7.2e-06	3	1932.89	1932.89	0.0009	0.465625
b23	b23.a1	pepb23a1a1	27_T3_1a_HCDOT	30212	60.36	LANDEESIMAFVQAMK	K16:+28.0313 - L1:+28.0313 - S7:+79.96633	7	7	1	b23.a1.a1	1.7e-09	3	1932.89	1932.89	0.0037	1.91424
b23	b23.a1	pepb23a1a1	02_T1_1b_HCDOT	32994	60.55	LANDEESIMAFVQAMK	K16:+28.0313 - L1:+28.0313 - S7:+79.96633	7	7	1	b23.a1.a1	0.00049	3	1932.89	1932.89	0.0029	1.50035
b23	b23.a1	pepb23a1a1	01_T1_1a_HCDOT	31893	60.43	LANDEESIMAFVQAMK	K16:+28.0313 - L1:+28.0313 - S7:+79.96633	7	7	1	b23.a1.a1	0.00014	3	1932.89	1932.89	0.0031	1.60382
b23	b23.a1	pepb23a1a1	28_T3_1b_HCDOT	29968	60.35	LANDEESIMAFVQAMK	K16:+28.0313 - L1:+28.0313 - S7:+79.96633	7	7	1	b23.a1.a1	3.1e-06	3	1932.89	1932.89	0.0031	1.60382
b23	b23.a1	pepb23a1a2	28_T3_1b_HCDOT	30012	60.41	LANDEESIMAFVQAMK	K16:+32.0564 - L1:+32.0564 - S7:+79.96633	7	7	1	b23.a1.a1	7.4e-07	3	1940.94	1940.94	0.0017	0.875866
b23	b23.a1	pepb23a1a2	15_T2_1b_HCDOT	31809	60.36	LANDEESIMAFVQAMK	K16:+32.0564 - L1:+32.0564 - S7:+79.96633	7	7	1	b23.a1.a1	5.7e-06	3	1940.94	1940.94	0.0044	2.26695
b23	b23.a1	pepb23a1a2	41_T4_1b_HCDOT	30373	60.55	LANDEESIMAFVQAMK	K16:+32.0564 - L1:+32.0564 - S7:+79.96633	7	7	1	b23.a1.a1	4.6e-06	3	1940.94	1940.94	0.005	2.57608
b23	b23.a1	pepb23a1a2	02_T1_1b_HCDOT	33018	60.58	LANDEESIMAFVQAMK	K16:+32.0564 - L1:+32.0564 - S7:+79.96633	7	7	1	b23.a1.a1	1.5e-07	3	1940.94	1940.94	0.0032	1.64869
b23	b23.a1	pepb23a1a2	01_T1_1a_HCDOT	31914	60.46	LANDEESIMAFVQAMK	K16:+32.0564 - L1:+32.0564 - S7:+79.96633	7	7	1	b23.a1.a1	8.3e-09	3	1940.94	1940.94	0.0008	0.412172
b24	b24.a1	pepb24a1a1	01_T1_1a_HCDOT	10221	28.15	KDTSDSSSNQSTVVIK	K1:+36.0756 - K16:+36.0756 - K1:+36.0756 - S4:+79.96633 - T3:+79.96633	3 4	3 4	1	b24.a1.a1	3.9e-10	2	1964.01	1964	0.007	3.56416
b24	b24.a1	pepb24a1a1	42_T4_2a_HCDOT	7358	27.86	KDTSDSSSNQSTVVIK	K1:+36.0756 - K16:+36.0756 - K1:+36.0756 - S4:+79.96633 - T3:+79.96633	3 4	3 4	1	b24.a1.a1	0.00044	2	1964	1964	0.0033	1.68024
b24	b24.a1	pepb24a1a1	28_T3_1b_HCDOT	9637	28.21	KDTSDSSSNQSTVVIK	K1:+36.0756 - K16:+36.0756 - K1:+36.0756 - S4:+79.96633 - T3:+79.96633	3 4	3 4	1	b24.a1.a1	8.6e-09	2	1964.01	1964	0.0082	4.17515
b24	b24.a1	pepb24a1a1	14_T2_1a_HCDOT	9530	27.26	KDTSDSSSNQSTVVIK	K1:+36.0756 - K16:+36.0756 - K1:+36.0756 - S4:+79.96633 - T3:+79.96633	3 4	3 4	1	b24.a1.a1	1.8e-11	2	1964	1964	-0.0022	-1.12016
b24	b24.a1	pepb24a1a1	03_T1_2a_HCDOT	9587	27.83	KDTSDSSSNQSTVVIK	K1:+36.0756 - K16:+36.0756 - K1:+36.0756 - S4:+79.96633 - T3:+79.96633	3 4	3 4	1	b24.a1.a1	3e-11	2	1964	1964	0.0048	2.44399
b24	b24.a1	pepb24a1a1	14_T2_1a_HCDOT	10042	28.06	KDTSDSSSNQSTVVIK	K1:+36.0756 - K16:+36.0756 - K1:+36.0756 - S4:+79.96633 - T3:+79.96633	3 4	3 4	1	b24.a1.a1	4.6e-06	2	1964.01	1964	0.0059	3.00407
b24	b24.a1	pepb24a1a1	27_T3_1a_HCDOT	9415	28.15	KDTSDSSSNQSTVVIK	K1:+36.0756 - K16:+36.0756 - K1:+36.0756 - S4:+79.96633 - T3:+79.96633	3 4	3 4	1	b24.a1.a1	1.2e-10	2	1964.01	1964	0.006	3.05499
b24	b24.a1	pepb24a1a1	28_T3_1b_HCDOT	9226	27.53	KDTSDSSSNQSTVVIK	K1:+36.0756 - K16:+36.0756 - K1:+36.0756 - S4:+79.96633 - T3:+79.96633	3 4	3 4	1	b24.a1.a1	3.4e-11	2	1964	1964	0.0031	1.57841
b24	b24.a1	pepb24a1a1	02_T1_1b_HCDOT	11549	28.35	KDTSDSSSNQSTVVIK	K1:+36.0756 - K16:+36.0756 - K1:+36.0756 - S4:+79.96633 - T3:+79.96633	3 4	3 4	1	b24.a1.a1	2e-09	2	1964.01	1964	0.0057	2.90224
b24	b24.a1	pepb24a1a1	16_T2_2a_HCDOT	8990	27.7	KDTSDSSSNQSTVVIK	K1:+36.0756 - K16:+36.0756 - K1:+36.0756 - S4:+79.96633 - T3:+79.96633	3 4	3 4	1	b24.a1.a1	2e-10	2	1964.01	1964	0.0067	3.41141
b24	b24.a1	pepb24a1a1	17_T2_2b_HCDOT	8622	27.7	KDTSDSSSNQSTVVIK	K1:+36.0756 - K16:+36.0756 - K1:+36.0756 - S4:+79.96633 - T3:+79.96633	3 4	3 4	1	b24.a1.a1	7.7e-06	2	1964.01	1964	0.006	3.05499
b24	b24.a1	pepb24a1a1	02_T1_1b_HCDOT	11110	27.63	KDTSDSSSNQSTVVIK	K1:+36.0756 - K16:+36.0756 - K1:+36.0756 - S4:+79.96633 - T3:+79.96633	3 4	3 4	1	b24.a1.a1	2.2e-10	2	1964.01	1964	0.0065	3.30957
b24	b24.a1	pepb24a1a1	03_T1_2a_HCDOT	9965	28.51	KDTSDSSSNQSTVVIK	K1:+36.0756 - K16:+36.0756 - K1:+36.0756 - S4:+79.96633 - T3:+79.96633	3 4	3 4	1	b24.a1.a1	3.3e-06	2	1964.01	1964	0.0081	4.12424
b24	b24.a1	pepb24a1a1	01_T1_1a_HCDOT	9759	27.45	KDTSDSSSNQSTVVIK	K1:+36.0756 - K16:+36.0756 - K1:+36.0756 - S4:+79.96633 - T3:+79.96633	3 4	3 4	1	b24.a1.a1	4.1e-11	2	1964.01	1964	0.0096	4.88799
b24	b24.a1	pepb24a1a1	15_T2_1b_HCDOT	10486	27.45	KDTSDSSSNQSTVVIK	K1:+36.0756 - K16:+36.0756 - K1:+36.0756 - S4:+79.96633 - T3:+79.96633	3 4	3 4	1	b24.a1.a1	5e-10	2	1964	1964	0.0048	2.44399
b24	b24.a1	pepb24a1a1	04_T1_2b_HCDOT	9041	27.86	KDTSDSSSNQSTVVIK	K1:+36.0756 - K16:+36.0756 - K1:+36.0756 - S4:+79.96633 - T3:+79.96633	3 4	3 4	1	b24.a1.a1	1.5e-09	2	1964.01	1964	0.0061	3.10591
b25	b25.a1	pepb25a1a7	40_T4_1a_HCDOT	7987	25.95	NTTIPTSK	K8:+28.0313 - N1:+28.0313 - T3:+79.96633	3	3	1	b25.a1.a1	8.2e-05	2	997.498	997.497	0.0014	1.40351
b25	b25.a1	pepb25a1a7	02_T1_1b_HCDOT	9993	25.98	NTTIPTSK	K8:+28.0313 - N1:+28.0313 - T3:+79.96633	3	3	1	b25.a1.a1	0.00044	2	997.499	997.497	0.0015	1.50376
b25	b25.a1	pepb25a1a7	01_T1_1a_HCDOT	8770	25.95	NTTIPTSK	K8:+28.0313 - N1:+28.0313 - T3:+79.96633	3	3	1	b25.a1.a1	9.9e-05	2	997.498	997.497	0.0009	0.902258
b25	b25.a1	pepb25a1a7	27_T3_1a_HCDOT	8035	25.95	NTTIPTSK	K8:+28.0313 - N1:+28.0313 - T3:+79.96633	3	3	1	b25.a1.a1	0.00037	2	997.497	997.497	0.0004	0.401004
b25	b25.a1	pepb25a1a7	14_T2_1a_HCDOT	8569	25.76	NTTIPTSK	K8:+28.0313 - N1:+28.0313 - T3:+79.96633	3	3	1	b25.a1.a1	7.2e-05	2	997.497	997.497	0.0004	0.401004
b25	b25.a1	pepb25a1a8	14_T2_1a_HCDOT	8541	25.73	NTTIPTSK	K8:+32.0564 - N1:+32.0564 - T3:+79.96633	3	3	1	b25.a1.a1	0.0003	2	1005.55	1005.55	0.0006	0.59669
b25	b25.a1	pepb25a1a9	41_T4_1b_HCDOT	8260	25.91	NTTIPTSK	K8:+36.0756 - N1:+36.0756 - T3:+79.96633	3	3	1	b25.a1.a1	0.00027	2	1013.59	1013.59	0.0025	2.46649
b25	b25.a2	pepb25a2a5	01_T1_1a_HCDOT	20511	43.43	LYEQAAAAQQAQAGAEGAQATDNSGDDVVDGEFTEK	K36:+32.0564 - L1:+32.0564 - S24:+79.96633	24	21 24	1	b25.a2.a1	3.3e-15	3	3799.71	3799.71	-0.0004	-0.105271
b25	b25.a2	pepb25a2a6	27_T3_1a_HCDOT	19107	43.43	LYEQAAAAQQAQAGAEGAQATDNSGDDVVDGEFTEK	K36:+36.0756 - L1:+36.0756 - S24:+79.96633	24	21 24	1	b25.a2.a1	1.3e-09	3	3807.75	3807.74	0.0072	1.89088
b25	b25.a2	pepb25a2a6	02_T1_1b_HCDOT	21777	43.7	LYEQAAAAQQAQAGAEGAQATDNSGDDVVDGEFTEK	K36:+36.0756 - L1:+36.0756 - S24:+79.96633	24	21 24	1	b25.a2.a1	6.7e-14	3	3807.76	3807.75	0.015	3.93934
b25	b25.a2	pepb25a2a4	27_T3_1a_HCDOT	19095	43.41	LYEQAAAAQQAQAGAEGAQATDNSGDDVVDGEFTEK	K36:+28.0313 - L1:+28.0313 - S24:+79.96633	24	21 24	1	b25.a2.a1	1e-15	3	3791.66	3791.66	-0.001	-0.263737
b25	b25.a3	pepb25a3a3	14_T2_1a_HCDOT	20341	43.75	EQTIVIQSNSGLTDEEIER	E1:+36.0756 - S10:+79.96633	10	8 10	1	b25.a3.a1	6e-12	2	2277.11	2277.1	0.002	0.878309
b25	b25.a3	pepb25a3a2	41_T4_1b_HCDOT	19517	44.05	EQTIVIQSNSGLTDEEIER	E1:+32.0564 - S8:+79.96633	8	8 10	1	b25.a3.a1	7.8e-08	2	2273.09	2273.09	0.0029	1.2758
b25	b25.a3	pepb25a3a1	41_T4_1b_HCDOT	19547	44.1	EQTIVIQSNSGLTDEEIER	E1:+28.0313 - S10:+79.96633	10	8 10	1	b25.a3.a1	9.6e-06	2	2269.06	2269.06	-0.0001	-0.0440711
b25	b25.a4	pepb25a4b11	15_T2_1b_HCDOT	20997	44.06	VTKAVITVPAYFNDAQR	K3:+36.0756 - V1:+36.0756 - T2:+79.96633 - T7:+79.96633	2 7	2 7	1	b25.a4.a1	1.4e-06	3	2125.12	2125.11	0.017	7.9996
b25	b25.a5	pepb25a5b10	01_T1_1a_HCDOT	32772	61.71	QALSDAGLSLSDIDEVILVGGSTR	Q1:+28.0313 - S4:+79.96633	4	4 9 11	1	b25.a5.a1	9.8e-08	3	2524.26	2524.25	0.0064	2.5354
b26	b26.a1	pepb26a1a3	02_T1_1b_HCDOT	14536	32.81	FQAAAGQLDQTAR	F1:+36.0756 - T11:+79.96633	11	11	1	b26.a1.a1	9.8e-05	2	1492.74	1492.73	0.0039	2.61266
b26	b26.a1	pepb26a1a3	01_T1_1a_HCDOT	13275	32.73	FQAAAGQLDQTAR	F1:+36.0756 - T11:+79.96633	11	11	1	b26.a1.a1	2.7e-08	2	1492.74	1492.73	0.0032	2.14372
b26	b26.a1	pepb26a1a3	28_T3_1b_HCDOT	12307	32.7	FQAAAGQLDQTAR	F1:+36.0756 - T11:+79.96633	11	11	1	b26.a1.a1	1.2e-08	2	1492.74	1492.73	0.0011	0.736903
b26	b26.a1	pepb26a1a3	27_T3_1a_HCDOT	12243	32.71	FQAAAGQLDQTAR	F1:+36.0756 - T11:+79.96633	11	11	1	b26.a1.a1	2.2e-07	2	1492.74	1492.73	0.002	1.33982
b26	b26.a1	pepb26a1a1	28_T3_1b_HCDOT	12329	32.73	FQAAAGQLDQTAR	F1:+28.0313 - T11:+79.96633	11	11	1	b26.a1.a1	3.2e-07	2	1484.69	1484.69	0.0016	1.07767
b26	b26.a1	pepb26a1a1	02_T1_1b_HCDOT	14572	32.86	FQAAAGQLDQTAR	F1:+28.0313 - T11:+79.96633	11	11	1	b26.a1.a1	9.4e-08	2	1484.69	1484.69	0.0039	2.62681
b26	b26.a1	pepb26a1a1	01_T1_1a_HCDOT	13307	32.76	FQAAAGQLDQTAR	F1:+28.0313 - T11:+79.96633	11	11	1	b26.a1.a1	8.4e-09	2	1484.69	1484.69	0.0032	2.15533
b26	b26.a1	pepb26a1a1	27_T3_1a_HCDOT	12267	32.75	FQAAAGQLDQTAR	F1:+28.0313 - T11:+79.96633	11	11	1	b26.a1.a1	5.4e-06	2	1484.69	1484.69	0.0024	1.6165
b26	b26.a1	pepb26a1a1	40_T4_1a_HCDOT	12205	32.78	FQAAAGQLDQTAR	F1:+28.0313 - T11:+79.96633	11	11	1	b26.a1.a1	9.6e-05	2	1484.69	1484.69	0.0015	1.01031
b26	b26.a1	pepb26a1a2	41_T4_1b_HCDOT	12446	32.81	FQAAAGQLDQTAR	F1:+32.0564 - T11:+79.96633	11	11	1	b26.a1.a1	4.1e-08	2	1488.72	1488.71	0.0027	1.81364
b26	b26.a1	pepb26a1a2	15_T2_1b_HCDOT	13666	32.6	FQAAAGQLDQTAR	F1:+32.0564 - T11:+79.96633	11	11	1	b26.a1.a1	2.5e-07	2	1488.71	1488.71	0.0002	0.134344
b26	b26.a1	pepb26a1a2	14_T2_1a_HCDOT	12927	32.5	FQAAAGQLDQTAR	F1:+32.0564 - T11:+79.96633	11	11	1	b26.a1.a1	4.9e-08	2	1488.71	1488.71	0.0002	0.134344
b26	b26.a1	pepb26a1a2	40_T4_1a_HCDOT	12073	32.58	FQAAAGQLDQTAR	F1:+32.0564 - T11:+79.96633	11	11	1	b26.a1.a1	3.9e-08	2	1488.72	1488.71	0.0037	2.48537
b26	b26.a2	pepb26a2a4	01_T1_1a_HCDOT	13979	33.76	GLSQEELAK	K9:+32.0564 - G1:+32.0564 - S3:+79.96633	3	3	1	b26.a2.a1	2.2e-05	2	1118.6	1118.59	0.0011	0.983377
b26	b26.a2	pepb26a2a4	40_T4_1a_HCDOT	12710	33.58	GLSQEELAK	K9:+32.0564 - G1:+32.0564 - S3:+79.96633	3	3	1	b26.a2.a1	0.0002	2	1118.6	1118.59	0.0031	2.77133
b27	b27.a1	pepb27a1a4	41_T4_1b_HCDOT	15590	37.86	FSVATSENEVK	K11:+28.0313 - F1:+28.0313 - S2:+79.96633	2	2 5 6	1	b27.a1.a1	0.00072	2	1346.63	1346.62	0.0015	1.1139
b27	b27.a1	pepb27a1a4	15_T2_1b_HCDOT	15717	35.78	FSVATSENEVK	K11:+28.0313 - F1:+28.0313 - S6:+79.96633	6	2 5 6	1	b27.a1.a1	2e-05	2	1346.63	1346.62	0.0018	1.33668
b27	b27.a1	pepb27a1a4	03_T1_2a_HCDOT	15279	38.06	FSVATSENEVK	K11:+28.0313 - F1:+28.0313 - S2:+79.96633	2	2 5 6	1	b27.a1.a1	0.00095	2	1346.63	1346.62	0.0024	1.78223
b27	b27.a1	pepb27a1a4	02_T1_1b_HCDOT	16692	36.03	FSVATSENEVK	K11:+28.0313 - F1:+28.0313 - S6:+79.96633	6	2 5 6	1	b27.a1.a1	0.00026	2	1346.63	1346.62	0.002	1.4852
b27	b27.a1	pepb27a1a4	01_T1_1a_HCDOT	15490	35.96	FSVATSENEVK	K11:+28.0313 - F1:+28.0313 - S2:+79.96633	2	2 5 6	1	b27.a1.a1	0.00035	2	1346.63	1346.62	0.0018	1.33668
b27	b27.a1	pepb27a1a6	02_T1_1b_HCDOT	16742	36.1	FSVATSENEVK	K11:+36.0756 - F1:+36.0756 - T5:+79.96633	5	5 6	1	b27.a1.a1	0.00032	2	1362.71	1362.71	0.002	1.46766
b27	b27.a1	pepb27a1a5	15_T2_1b_HCDOT	16880	37.63	FSVATSENEVK	K11:+32.0564 - F1:+32.0564 - T5:+79.96633	5	5	1	b27.a1.a1	3.6e-05	2	1354.68	1354.67	0.0009	0.664366
b27	b27.a1	pepb27a1a5	14_T2_1a_HCDOT	16218	37.43	FSVATSENEVK	K11:+32.0564 - F1:+32.0564 - T5:+79.96633	5	5	1	b27.a1.a1	2.6e-05	2	1354.68	1354.67	0.001	0.738185
b27	b27.a2	pepb27a2a3	02_T1_1b_HCDOT	30091	56.11	ANVVSLVTPTTGYLVDLSSVNDEHFASGSMGK	K32:+36.0756 - A1:+36.0756 - S18:+79.96633	18	8 10 11 13 18 19	1	b27.a2.a1	1.8e-06	3	3447.74	3447.73	0.0052	1.50824
b27	b27.a2	pepb27a2a3	01_T1_1a_HCDOT	29343	56.58	ANVVSLVTPTTGYLVDLSSVNDEHFASGSMGK	K32:+36.0756 - A1:+36.0756 - T8:+79.96633	8	8 10 11 13 18 19	1	b27.a2.a1	3.3e-05	3	3447.74	3447.73	0.0081	2.34937
b27	b27.a2	pepb27a2a1	15_T2_1b_HCDOT	29811	57.36	ANVVSLVTPTTGYLVDLSSVNDEHFASGSMGK	K32:+28.0313 - A1:+28.0313 - T11:+79.96633	11	8 10 11 13 18 19	1	b27.a2.a1	3.4e-06	3	3431.65	3431.64	0.0073	2.12726
b27	b27.a2	pepb27a2a1	02_T1_1b_HCDOT	30562	56.83	ANVVSLVTPTTGYLVDLSSVNDEHFASGSMGK	K32:+28.0313 - A1:+28.0313 - S18:+79.96633	18	8 10 11 13 18 19	1	b27.a2.a1	0.00064	3	3431.65	3431.64	0.0091	2.65179
b27	b27.a2	pepb27a2a1	40_T4_1a_HCDOT	27100	55.78	ANVVSLVTPTTGYLVDLSSVNDEHFASGSMGK	K32:+28.0313 - A1:+28.0313 - T8:+79.96633	8	8 10 11 13 18 19	1	b27.a2.a1	9.7e-08	3	3431.66	3431.64	0.011	3.20546
b27	b27.a2	pepb27a2a2	15_T2_1b_HCDOT	28730	55.73	ANVVSLVTPTTGYLVDLSSVNDEHFASGSMGK	K32:+32.0564 - A1:+32.0564 - S19:+79.96633	19	10 11 13 18 19	1	b27.a2.a1	5.4e-06	3	3439.71	3439.7	0.019	5.52375
b27	b27.a3	pepb27a3a7	02_T1_1b_HCDOT	25680	49.5	NGLDDTVLVTVTNSEK	K16:+36.0756 - N1:+36.0756 - T6:+79.96633	6	6	1	b27.a3.a1	0.00038	3	1856.98	1856.98	0.0018	0.969314
b28	b28.a1	pepb28a1a3	02_T1_1b_HCDOT	22652	45.01	LDAALAASQDELSVIREK	K18:+36.0756 - L1:+36.0756 - S13:+79.96633	13	8 13	1	b28.a1.a1	5.1e-06	2	2081.15	2081.15	0.0023	1.10516
b28	b28.a1	pepb28a1a3	01_T1_1a_HCDOT	21355	44.7	LDAALAASQDELSVIREK	K18:+36.0756 - L1:+36.0756 - S13:+79.96633	13	8 13	1	b28.a1.a1	6.1e-07	2	2081.15	2081.15	0.0047	2.25837
b28	b28.a1	pepb28a1a1	02_T1_1b_HCDOT	22619	44.96	LDAALAASQDELSVIREK	K18:+28.0313 - L1:+28.0313 - S8:+79.96633	8	8 13	1	b28.a1.a1	1.3e-06	2	2065.06	2065.06	0.0025	1.21062
b28	b28.a1	pepb28a1a1	01_T1_1a_HCDOT	21394	44.75	LDAALAASQDELSVIREK	K18:+28.0313 - L1:+28.0313 - S13:+79.96633	13	8 13	1	b28.a1.a1	8.3e-10	2	2065.06	2065.06	0.0047	2.27596
b28	b28.a1	pepb28a1a1	01_T1_1a_HCDOT	21361	44.7	LDAALAASQDELSVIREK	K18:+28.0313 - L1:+28.0313 - S13:+79.96633	13	8 13	1	b28.a1.a1	3.8e-08	3	2065.06	2065.06	0.0044	2.13069
b28	b28.a1	pepb28a1a1	41_T4_1b_HCDOT	20165	45.08	LDAALAASQDELSVIREK	K18:+28.0313 - L1:+28.0313 - S13:+79.96633	13	8 13	1	b28.a1.a1	3.9e-07	2	2065.07	2065.06	0.0086	4.16453
b28	b28.a1	pepb28a1a1	41_T4_1b_HCDOT	20148	45.05	LDAALAASQDELSVIREK	K18:+28.0313 - L1:+28.0313 - S13:+79.96633	13	8 13	1	b28.a1.a1	0.00065	3	2065.06	2065.06	0.0053	2.56651
b28	b28.a1	pepb28a1a1	40_T4_1a_HCDOT	19773	44.71	LDAALAASQDELSVIREK	K18:+28.0313 - L1:+28.0313 - S13:+79.96633	13	8 13	1	b28.a1.a1	2.9e-12	2	2065.06	2065.06	0.0013	0.629522
b28	b28.a1	pepb28a1a2	02_T1_1b_HCDOT	22651	45.01	LDAALAASQDELSVIREK	K18:+32.0564 - L1:+32.0564 - S8:+79.96633	8	8 13	1	b28.a1.a1	5.7e-05	2	2073.11	2073.11	0.0045	2.17065
b28	b28.a1	pepb28a1a2	41_T4_1b_HCDOT	20142	45.05	LDAALAASQDELSVIREK	K18:+32.0564 - L1:+32.0564 - S13:+79.96633	13	8 13	1	b28.a1.a1	1.7e-11	2	2073.12	2073.11	0.007	3.37657
b28	b28.a1	pepb28a1a2	15_T2_1b_HCDOT	21353	44.63	LDAALAASQDELSVIREK	K18:+32.0564 - L1:+32.0564 - S13:+79.96633	13	8 13	1	b28.a1.a1	9.5e-08	2	2073.11	2073.11	0.0019	0.916498
b28	b28.a1	pepb28a1a2	01_T1_1a_HCDOT	21371	44.71	LDAALAASQDELSVIREK	K18:+32.0564 - L1:+32.0564 - S13:+79.96633	13	8 13	1	b28.a1.a1	3.3e-09	2	2073.11	2073.11	0.0009	0.434131
b28	b28.a1	pepb28a1a2	28_T3_1b_HCDOT	19821	44.71	LDAALAASQDELSVIREK	K18:+32.0564 - L1:+32.0564 - S13:+79.96633	13	8 13	1	b28.a1.a1	0.00013	2	2073.11	2073.11	-0.0016	-0.771788
b28	b28.a1	pepb28a1a2	14_T2_1a_HCDOT	20771	44.4	LDAALAASQDELSVIREK	K18:+32.0564 - L1:+32.0564 - S13:+79.96633	13	8 13	1	b28.a1.a1	5.7e-12	2	2073.11	2073.11	0.0004	0.192947
b29	b29.a1	pepb29a1a1	14_T2_1a_HCDOT	29534	57.48	ASADELQAIIDEAWKNPEFQEASK	K15:+36.0756 - K24:+36.0756 - A1:+36.0756 - S23:+79.96633	23	23	1	b29.a1.a1	3.2e-08	3	2878.5	2878.49	0.0074	2.57079
b29	b29.a1	pepb29a1a1	41_T4_1b_HCDOT	28939	58.4	ASADELQAIIDEAWKNPEFQEASK	K15:+36.0756 - K24:+36.0756 - A1:+36.0756 - S23:+79.96633	23	23	1	b29.a1.a1	2e-05	3	2878.5	2878.49	0.015	5.21107
b29	b29.a1	pepb29a1a1	28_T3_1b_HCDOT	29042	58.91	ASADELQAIIDEAWKNPEFQEASK	K15:+36.0756 - K24:+36.0756 - A1:+36.0756 - S23:+79.96633	23	23	1	b29.a1.a1	2.8e-06	3	2878.5	2878.49	0.0096	3.33508
b29	b29.a1	pepb29a1a1	14_T2_1a_HCDOT	28959	56.6	ASADELQAIIDEAWKNPEFQEASK	K15:+36.0756 - K24:+36.0756 - A1:+36.0756 - S23:+79.96633	23	23	1	b29.a1.a1	8e-08	3	2878.5	2878.49	0.0087	3.02242
b29	b29.a1	pepb29a1a1	40_T4_1a_HCDOT	28812	58.36	ASADELQAIIDEAWKNPEFQEASK	K15:+36.0756 - K24:+36.0756 - A1:+36.0756 - S23:+79.96633	23	23	1	b29.a1.a1	9.5e-09	3	2878.5	2878.49	0.0098	3.40457
b29	b29.a1	pepb29a1a1	27_T3_1a_HCDOT	27403	56.08	ASADELQAIIDEAWKNPEFQEASK	K15:+36.0756 - K24:+36.0756 - A1:+36.0756 - S23:+79.96633	23	23	1	b29.a1.a1	1.2e-09	3	2878.5	2878.49	0.013	4.51626
b29	b29.a1	pepb29a1a1	09_T1_5a_HCDOT	24894	59.86	ASADELQAIIDEAWKNPEFQEASK	K15:+36.0756 - K24:+36.0756 - A1:+36.0756 - S23:+79.96633	23	23	1	b29.a1.a1	1.2e-06	3	2878.48	2878.49	-0.0036	-1.25066
b29	b29.a1	pepb29a1a1	27_T3_1a_HCDOT	28721	58.08	ASADELQAIIDEAWKNPEFQEASK	K15:+36.0756 - K24:+36.0756 - A1:+36.0756 - S23:+79.96633	23	23	1	b29.a1.a1	5.5e-11	3	2878.5	2878.49	0.011	3.82145
b29	b29.a1	pepb29a1a1	15_T2_1b_HCDOT	29654	57.13	ASADELQAIIDEAWKNPEFQEASK	K15:+36.0756 - K24:+36.0756 - A1:+36.0756 - S23:+79.96633	23	23	1	b29.a1.a1	4.6e-07	3	2878.5	2878.49	0.0098	3.40457
b29	b29.a1	pepb29a1a1	14_T2_1a_HCDOT	28466	55.86	ASADELQAIIDEAWKNPEFQEASK	K15:+36.0756 - K24:+36.0756 - A1:+36.0756 - S23:+79.96633	23	23	1	b29.a1.a1	2.5e-08	3	2878.5	2878.49	0.013	4.51626
b29	b29.a1	pepb29a1a1	41_T4_1b_HCDOT	30060	60.1	ASADELQAIIDEAWKNPEFQEASK	K15:+36.0756 - K24:+36.0756 - A1:+36.0756 - S23:+79.96633	23	23	1	b29.a1.a1	3.7e-08	3	2878.49	2878.49	0.0006	0.208443
b29	b29.a1	pepb29a1a1	27_T3_1a_HCDOT	29888	59.88	ASADELQAIIDEAWKNPEFQEASK	K15:+36.0756 - K24:+36.0756 - A1:+36.0756 - S23:+79.96633	23	23	1	b29.a1.a1	1.7e-05	3	2878.49	2878.49	-0.0005	-0.173702
b29	b29.a1	pepb29a1a3	41_T4_1b_HCDOT	29080	58.61	MKASADELQAIIDEAWKNPEFQEASK	K2:+36.0756 - K17:+36.0756 - K26:+36.0756 - M1:+36.0756 - S25:+79.96633	25	25	1	b29.a1.a1	1.2e-06	3	3173.68	3173.7	-0.014	-4.41126
b29	b29.a2	pepb29a2a2	01_T1_1a_HCDOT	27169	53.3	AVGDALDLSHALPFTSPK	K18:+36.0756 - A1:+36.0756 - S9:+79.96633	9	9	1	b29.a2.a1	0.00016	3	1991.08	1991.08	0.0016	0.803583
b30	b30.a1	pepb30a1a2	40_T4_1a_HCDOT	27359	56.18	MTTENIGEIVIAPR	M1:+32.0564 - M1:+15.99491 - T3:+79.96633 - M1:+42.01057	3	2 3	1	b30.a1.a1	4e-11	2	1713.84	1713.84	-0.004	-2.33394
b30	b30.a1	pepb30a1a2	02_T1_1b_HCDOT	30207	56.3	MTTENIGEIVIAPR	M1:+32.0564 - M1:+15.99491 - T2:+79.96633 - M1:+42.01057	2	2 3	1	b30.a1.a1	1.3e-07	2	1713.84	1713.84	0.0001	0.0583484
b30	b30.a1	pepb30a1a2	14_T2_1a_HCDOT	28556	56	MTTENIGEIVIAPR	M1:+32.0564 - M1:+15.99491 - T3:+79.96633 - M1:+42.01057	3	2 3	1	b30.a1.a1	5.6e-10	2	1713.84	1713.84	0.0006	0.35009
b30	b30.a1	pepb30a1a2	28_T3_1b_HCDOT	27192	56.06	MTTENIGEIVIAPR	M1:+32.0564 - M1:+15.99491 - T3:+79.96633 - M1:+42.01057	3	2 3	1	b30.a1.a1	1.7e-09	2	1713.84	1713.84	-0.0041	-2.39228
b30	b30.a1	pepb30a1a2	27_T3_1a_HCDOT	27424	56.11	MTTENIGEIVIAPR	M1:+32.0564 - M1:+15.99491 - T2:+79.96633 - M1:+42.01057	2	2 3	1	b30.a1.a1	5.1e-15	2	1713.85	1713.84	0.0018	1.05027
b30	b30.a1	pepb30a1a2	27_T3_1a_HCDOT	27457	56.16	MTTENIGEIVIAPR	M1:+32.0564 - M1:+15.99491 - T2:+79.96633 - M1:+42.01057	2	2 3	1	b30.a1.a1	1.5e-10	2	1713.84	1713.84	0.0006	0.35009
b30	b30.a1	pepb30a1a2	01_T1_1a_HCDOT	29141	56.28	MTTENIGEIVIAPR	M1:+32.0564 - M1:+15.99491 - T2:+79.96633 - M1:+42.01057	2	2 3	1	b30.a1.a1	2.1e-13	2	1713.84	1713.84	0.0009	0.525135
b30	b30.a1	pepb30a1a1	28_T3_1b_HCDOT	27410	56.4	MTTENIGEIVIAPR	M1:+28.0313 - M1:+15.99491 - T3:+79.96633 - M1:+42.01057	3	2 3	1	b30.a1.a1	1.5e-08	2	1709.82	1709.82	-0.0019	-1.11123
b30	b30.a1	pepb30a1a1	15_T2_1b_HCDOT	29176	56.4	MTTENIGEIVIAPR	M1:+28.0313 - M1:+15.99491 - T2:+79.96633 - M1:+42.01057	2	2 3	1	b30.a1.a1	8.5e-08	2	1709.82	1709.82	0.0014	0.8188
b30	b30.a1	pepb30a1a1	14_T2_1a_HCDOT	28780	56.33	MTTENIGEIVIAPR	M1:+28.0313 - M1:+15.99491 - T2:+79.96633 - M1:+42.01057	2	2 3	1	b30.a1.a1	3.8e-07	2	1709.82	1709.82	0.0031	1.81306
b30	b30.a1	pepb30a1a1	02_T1_1b_HCDOT	30450	56.66	MTTENIGEIVIAPR	M1:+28.0313 - M1:+15.99491 - T2:+79.96633 - M1:+42.01057	2	2 3	1	b30.a1.a1	5.6e-08	2	1709.82	1709.82	0.0015	0.877286
b30	b30.a1	pepb30a1a1	27_T3_1a_HCDOT	27630	56.41	MTTENIGEIVIAPR	M1:+28.0313 - M1:+15.99491 - T2:+79.96633 - M1:+42.01057	2	2 3	1	b30.a1.a1	2.3e-07	2	1709.82	1709.82	0.0023	1.34517
b30	b30.a1	pepb30a1a1	01_T1_1a_HCDOT	29424	56.7	MTTENIGEIVIAPR	M1:+28.0313 - M1:+15.99491 - T2:+79.96633 - M1:+42.01057	2	2 3	1	b30.a1.a1	1.8e-06	2	1709.82	1709.82	0.0009	0.526372
b31	b31.a1	pepb31a1a3	27_T3_1a_HCDOT	7395	24.83	SDVQKTQVLR	K5:+36.0756 - S1:+36.0756 - T6:+79.96633	6	6	1	b31.a1.a1	0.00013	2	1325.78	1325.78	0.0001	0.0754275
b31	b31.a1	pepb31a1a3	28_T3_1b_HCDOT	7654	24.93	SDVQKTQVLR	K5:+36.0756 - S1:+36.0756 - T6:+79.96633	6	6	1	b31.a1.a1	0.00046	2	1325.78	1325.78	-0.0008	-0.60342
b31	b31.a1	pepb31a1a3	02_T1_1b_HCDOT	9250	24.81	SDVQKTQVLR	K5:+36.0756 - S1:+36.0756 - T6:+79.96633	6	6	1	b31.a1.a1	4e-05	2	1325.78	1325.78	-0.0005	-0.377137
b31	b31.a1	pepb31a1a1	28_T3_1b_HCDOT	7693	25	SDVQKTQVLR	K5:+28.0313 - S1:+28.0313 - T6:+79.96633	6	6	1	b31.a1.a1	0.00056	2	1309.69	1309.69	-0.0003	-0.229062
b31	b31.a1	pepb31a1a1	15_T2_1b_HCDOT	8771	24.75	SDVQKTQVLR	K5:+28.0313 - S1:+28.0313 - T6:+79.96633	6	6	1	b31.a1.a1	1.7e-05	2	1309.69	1309.69	-0.0002	-0.152708
b31	b31.a1	pepb31a1a1	02_T1_1b_HCDOT	9301	24.9	SDVQKTQVLR	K5:+28.0313 - S1:+28.0313 - T6:+79.96633	6	6	1	b31.a1.a1	5.4e-07	2	1309.69	1309.69	-0.0016	-1.22166
b31	b31.a1	pepb31a1a1	41_T4_1b_HCDOT	7715	24.93	SDVQKTQVLR	K5:+28.0313 - S1:+28.0313 - T6:+79.96633	6	6	1	b31.a1.a1	3.1e-05	2	1309.69	1309.69	-0.0014	-1.06896
b31	b31.a1	pepb31a1a1	40_T4_1a_HCDOT	7211	24.65	SDVQKTQVLR	K5:+28.0313 - S1:+28.0313 - T6:+79.96633	6	6	1	b31.a1.a1	1.6e-06	2	1309.69	1309.69	0.0002	0.152708
b31	b31.a1	pepb31a1a2	14_T2_1a_HCDOT	7978	24.83	SDVQKTQVLR	K5:+32.0564 - S1:+32.0564 - T6:+79.96633	6	6	1	b31.a1.a1	6.4e-05	2	1317.74	1317.74	-0.0018	-1.36598
b31	b31.a1	pepb31a1a2	40_T4_1a_HCDOT	7367	24.9	SDVQKTQVLR	K5:+32.0564 - S1:+32.0564 - T6:+79.96633	6	6	1	b31.a1.a1	1.7e-06	2	1317.74	1317.74	0.0011	0.834764
b31	b31.a1	pepb31a1a2	15_T2_1b_HCDOT	8741	24.7	SDVQKTQVLR	K5:+32.0564 - S1:+32.0564 - T6:+79.96633	6	6	1	b31.a1.a1	1.1e-06	2	1317.74	1317.74	-0.0011	-0.834764
b31	b31.a1	pepb31a1a2	41_T4_1b_HCDOT	7683	24.88	SDVQKTQVLR	K5:+32.0564 - S1:+32.0564 - T6:+79.96633	6	6	1	b31.a1.a1	0.00031	2	1317.74	1317.74	0.0016	1.2142
b32	b32.a1	pepb32a1a4	41_T4_1b_HCDOT	9513	27.88	MAESIAGQK	K9:+36.0756 - M1:+36.0756 - S4:+79.96633	4	4	1	b32.a1.a1	4.8e-06	2	1086.59	1086.58	0.003	2.76095
b32	b32.a1	pepb32a1a4	27_T3_1a_HCDOT	9252	27.88	MAESIAGQK	K9:+36.0756 - M1:+36.0756 - S4:+79.96633	4	4	1	b32.a1.a1	0.00066	2	1086.59	1086.58	0.0025	2.30079
b32	b32.a1	pepb32a1a4	15_T2_1b_HCDOT	10669	27.78	MAESIAGQK	K9:+36.0756 - M1:+36.0756 - S4:+79.96633	4	4	1	b32.a1.a1	0.00042	2	1086.59	1086.58	0.0023	2.11673
b32	b32.a1	pepb32a1a4	02_T1_1b_HCDOT	11272	27.91	MAESIAGQK	K9:+36.0756 - M1:+36.0756 - S4:+79.96633	4	4	1	b32.a1.a1	5.3e-05	2	1086.58	1086.58	0.0006	0.552189
b32	b32.a1	pepb32a1a4	01_T1_1a_HCDOT	10098	27.96	MAESIAGQK	K9:+36.0756 - M1:+36.0756 - S4:+79.96633	4	4	1	b32.a1.a1	0.00015	2	1086.59	1086.58	0.002	1.84063
b32	b32.a1	pepb32a1a3	41_T4_1b_HCDOT	9501	27.86	MAESIAGQK	K9:+32.0564 - M1:+32.0564 - S4:+79.96633	4	4	1	b32.a1.a1	0.00074	2	1078.55	1078.55	0.003	2.78152
b32	b32.a2	pepb32a2a2	15_T2_1b_HCDOT	20274	42.95	LIVALTESGNTAR	L1:+36.0756 - S8:+79.96633	8	6 8 11	1	b32.a2.a1	0.00013	2	1460.79	1460.79	0.0027	1.84831
b32	b32.a2	pepb32a2a2	14_T2_1a_HCDOT	19643	42.68	LIVALTESGNTAR	L1:+36.0756 - T6:+79.96633	6	6 8 11	1	b32.a2.a1	0.00041	2	1460.79	1460.79	-0.0004	-0.273824
b32	b32.a2	pepb32a2a2	27_T3_1a_HCDOT	18804	42.98	LIVALTESGNTAR	L1:+36.0756 - S8:+79.96633	8	6 8 11	1	b32.a2.a1	0.0002	2	1460.79	1460.79	0.002	1.36912
b32	b32.a2	pepb32a2a1	40_T4_1a_HCDOT	18730	43.1	LIVALTESGNTAR	L1:+32.0564 - S8:+79.96633	8	8	1	b32.a2.a1	1.1e-05	2	1456.78	1456.77	0.0066	4.53057
b32	b32.a3	pepb32a3a6	15_T2_1b_HCDOT	31156	59.4	VALESGLVESGDNIVIVAGIPVGSGNTNTMR	V1:+32.0564 - S10:+79.96633	10	10	1	b32.a3.a1	0.0002	3	3181.61	3181.61	-0.0003	-0.0942918
b32	b32.a3	pepb32a3a5	27_T3_1a_HCDOT	29425	59.18	VALESGLVESGDNIVIVAGIPVGSGNTNTMR	V1:+28.0313 - S10:+79.96633	10	10	1	b32.a3.a1	3.6e-06	3	3177.58	3177.59	-0.0032	-1.00705
b33	b33.a1	pepb33a1a4	15_T2_1b_HCDOT	24505	49.36	SFSFDSASVQGAVIK	K15:+32.0564 - S1:+32.0564 - S6:+79.96633	6	6	1	b33.a1.a1	1e-09	2	1686.86	1686.86	0.0021	1.24492
b33	b33.a1	pepb33a1a4	14_T2_1a_HCDOT	23943	49.15	SFSFDSASVQGAVIK	K15:+32.0564 - S1:+32.0564 - S6:+79.96633	6	6	1	b33.a1.a1	2e-10	2	1686.86	1686.86	0	0
b33	b33.a1	pepb33a1a3	41_T4_1b_HCDOT	23538	50.2	SFSFDSASVQGAVIK	K15:+28.0313 - S1:+28.0313 - S3:+79.96633	3	1 3 6	1	b33.a1.a1	2.5e-15	2	1678.81	1678.81	0.0048	2.85917
b33	b33.a1	pepb33a1a3	40_T4_1a_HCDOT	22909	49.46	SFSFDSASVQGAVIK	K15:+28.0313 - S1:+28.0313 - S6:+79.96633	6	1 3 6	1	b33.a1.a1	4.7e-05	2	1678.81	1678.81	0.0058	3.45483
b33	b33.a1	pepb33a1a3	27_T3_1a_HCDOT	22978	49.36	SFSFDSASVQGAVIK	K15:+28.0313 - S1:+28.0313 - S6:+79.96633	6	1 3 6	1	b33.a1.a1	2e-05	2	1678.81	1678.81	0.0047	2.7996
b33	b33.a1	pepb33a1a3	40_T4_1a_HCDOT	23373	50.18	SFSFDSASVQGAVIK	K15:+28.0313 - S1:+28.0313 - S3:+79.96633	3	1 3 6	1	b33.a1.a1	5.5e-09	2	1678.81	1678.81	-0.0004	-0.238264
b33	b33.a1	pepb33a1a3	27_T3_1a_HCDOT	23726	50.51	SFSFDSASVQGAVIK	K15:+28.0313 - S1:+28.0313 - S3:+79.96633	3	1 3 6	1	b33.a1.a1	4.1e-05	2	1678.81	1678.81	0.0018	1.07219
b33	b33.a1	pepb33a1a3	15_T2_1b_HCDOT	24897	49.96	SFSFDSASVQGAVIK	K15:+28.0313 - S1:+28.0313 - S3:+79.96633	3	1 3 6	1	b33.a1.a1	1.3e-06	2	1678.81	1678.81	0.0049	2.91874
b33	b33.a1	pepb33a1a3	14_T2_1a_HCDOT	24390	49.81	SFSFDSASVQGAVIK	K15:+28.0313 - S1:+28.0313 - S3:+79.96633	3	1 3 6	1	b33.a1.a1	1e-15	2	1678.81	1678.81	0.0015	0.89349
b33	b33.a2	pepb33a2a2	27_T3_1a_HCDOT	8939	27.36	KVTTAPSQSSVPNQQVAQEQQR	K1:+36.0756 - K1:+36.0756 - S7:+79.96633	7	7 9 10	1	b33.a2.a1	6.5e-07	3	2563.34	2563.35	-0.0033	-1.28738
b33	b33.a2	pepb33a2a1	40_T4_1a_HCDOT	8820	27.25	KVTTAPSQSSVPNQQVAQEQQR	K1:+32.0564 - K1:+32.0564 - S9:+79.96633	9	7 9 10	1	b33.a2.a1	5.2e-06	3	2555.31	2555.31	0.0028	1.09576
b33	b33.a2	pepb33a2a1	28_T3_1b_HCDOT	9180	27.46	KVTTAPSQSSVPNQQVAQEQQR	K1:+32.0564 - K1:+32.0564 - S9:+79.96633	9	7 9 10	1	b33.a2.a1	0.00027	3	2555.31	2555.31	-0.0016	-0.626148
b34	b34.a1	pepb34a1a5	02_T1_1b_HCDOT	26278	50.41	RDNIVQAIEEGLSQTQELENQNEK	K24:+36.0756 - R1:+36.0756 - S13:+79.96633	13	13 15	1	b34.a1.a1	4.7e-14	3	2937.47	2937.48	-0.0042	-1.4298
b34	b34.a1	pepb34a1a5	27_T3_1a_HCDOT	23376	49.98	RDNIVQAIEEGLSQTQELENQNEK	K24:+36.0756 - R1:+36.0756 - T15:+79.96633	15	13 15	1	b34.a1.a1	3.2e-12	3	2937.48	2937.48	0.0041	1.39576
b34	b34.a1	pepb34a1a4	41_T4_1b_HCDOT	24055	51	RDNIVQAIEEGLSQTQELENQNEK	K24:+32.0564 - R1:+32.0564 - T15:+79.96633	15	15	1	b34.a1.a1	4.2e-14	3	2929.45	2929.44	0.0076	2.59435
b34	b34.a1	pepb34a1a4	14_T2_1a_HCDOT	24231	49.56	RDNIVQAIEEGLSQTQELENQNEK	K24:+32.0564 - R1:+32.0564 - T15:+79.96633	15	15	1	b34.a1.a1	2e-14	3	2929.43	2929.44	-0.0046	-1.57027
b34	b34.a1	pepb34a1a4	40_T4_1a_HCDOT	23483	50.35	RDNIVQAIEEGLSQTQELENQNEK	K24:+32.0564 - R1:+32.0564 - T15:+79.96633	15	15	1	b34.a1.a1	1e-15	3	2929.44	2929.44	0.0021	0.716861
b34	b34.a1	pepb34a1a1	16_T2_2a_HCDOT	26952	60	DNIVQAIEEGLSQTQELENQNEK	K23:+28.0313 - D1:+28.0313 - T14:+79.96633	14	12 14	1	b34.a1.a1	9.9e-11	3	2765.3	2765.29	0.0085	3.07382
b34	b34.a1	pepb34a1a1	28_T3_1b_HCDOT	29704	59.95	DNIVQAIEEGLSQTQELENQNEK	K23:+28.0313 - D1:+28.0313 - T14:+79.96633	14	12 14	1	b34.a1.a1	1e-12	3	2765.29	2765.29	0.0042	1.51883
b34	b34.a1	pepb34a1a1	14_T2_1a_HCDOT	31165	59.93	DNIVQAIEEGLSQTQELENQNEK	K23:+28.0313 - D1:+28.0313 - S12:+79.96633	12	12 14	1	b34.a1.a1	1.1e-11	3	2765.3	2765.29	0.0084	3.03766
b34	b34.a1	pepb34a1a1	40_T4_1a_HCDOT	29920	60.05	DNIVQAIEEGLSQTQELENQNEK	K23:+28.0313 - D1:+28.0313 - S12:+79.96633	12	12 14	1	b34.a1.a1	5.5e-12	3	2765.3	2765.29	0.0073	2.63987
b34	b34.a1	pepb34a1a1	15_T2_1b_HCDOT	31530	59.96	DNIVQAIEEGLSQTQELENQNEK	K23:+28.0313 - D1:+28.0313 - S12:+79.96633	12	12 14	1	b34.a1.a1	1.1e-12	3	2765.29	2765.29	0.0054	1.95278
b34	b34.a1	pepb34a1a3	27_T3_1a_HCDOT	29923	59.93	DNIVQAIEEGLSQTQELENQNEK	K23:+36.0756 - D1:+36.0756 - T14:+79.96633	14	12 14	1	b34.a1.a1	9.5e-15	3	2781.38	2781.38	0.0059	2.12125
b34	b34.a1	pepb34a1a2	41_T4_1b_HCDOT	30007	60.01	DNIVQAIEEGLSQTQELENQNEK	K23:+32.0564 - D1:+32.0564 - S12:+79.96633	12	12 14	1	b34.a1.a1	1.5e-12	3	2773.34	2773.34	0.0053	1.91105
b35	b35.a1	pepb35a1a2	14_T2_1a_HCDOT	21039	44.8	GYAQNNPIVEYQSESFK	K17:+32.0564 - G1:+32.0564 - Y2:+79.96633	2	2	1	b35.a1.a1	6.5e-09	2	2118.01	2118	0.008	3.77714
b35	b35.a1	pepb35a1a2	41_T4_1b_HCDOT	20339	45.35	GYAQNNPIVEYQSESFK	K17:+32.0564 - G1:+32.0564 - Y2:+79.96633	2	2	1	b35.a1.a1	1e-15	2	2118.01	2118	0.0022	1.03871
b35	b35.a1	pepb35a1a2	40_T4_1a_HCDOT	20036	45.13	GYAQNNPIVEYQSESFK	K17:+32.0564 - G1:+32.0564 - Y2:+79.96633	2	2	1	b35.a1.a1	1e-15	2	2118.01	2118	0.0041	1.93579
b35	b35.a1	pepb35a1a2	01_T1_1a_HCDOT	21668	45.15	GYAQNNPIVEYQSESFK	K17:+32.0564 - G1:+32.0564 - Y2:+79.96633	2	2	1	b35.a1.a1	3.3e-07	2	2118.01	2118	0.0078	3.68271
b35	b35.a1	pepb35a1a1	40_T4_1a_HCDOT	20034	45.13	GYAQNNPIVEYQSESFK	K17:+28.0313 - G1:+28.0313 - Y2:+79.96633	2	2	1	b35.a1.a1	0.00019	2	2109.96	2109.95	0.0023	1.09007
b35	b35.a1	pepb35a1a1	01_T1_1a_HCDOT	21674	45.15	GYAQNNPIVEYQSESFK	K17:+28.0313 - G1:+28.0313 - Y2:+79.96633	2	2	1	b35.a1.a1	1e-15	2	2109.96	2109.95	0.0023	1.09007
b35	b35.a1	pepb35a1a3	02_T1_1b_HCDOT	22908	45.4	GYAQNNPIVEYQSESFK	K17:+36.0756 - G1:+36.0756 - Y2:+79.96633	2	2	1	b35.a1.a1	0.00025	3	2126.05	2126.04	0.0052	2.44586
b35	b35.a2	pepb35a2a5	01_T1_1a_HCDOT	15601	36.13	VSTTATGNIQAHQADANGQEIDFSK	K25:+36.0756 - V1:+36.0756 - T4:+79.96633	4	4 6	1	b35.a2.a1	2.9e-15	3	2755.36	2755.35	0.0052	1.88724
b35	b35.a2	pepb35a2a5	28_T3_1b_HCDOT	14184	35.75	VSTTATGNIQAHQADANGQEIDFSK	K25:+36.0756 - V1:+36.0756 - T6:+79.96633	6	4 6	1	b35.a2.a1	1.3e-15	3	2755.36	2755.35	0.0049	1.77836
b35	b35.a2	pepb35a2a4	14_T2_1a_HCDOT	14907	35.45	VSTTATGNIQAHQADANGQEIDFSK	K25:+32.0564 - V1:+32.0564 - T6:+79.96633	6	3 4 6	1	b35.a2.a1	3.7e-15	3	2747.32	2747.31	0.0033	1.20117
b35	b35.a2	pepb35a2a4	15_T2_1b_HCDOT	15574	35.55	VSTTATGNIQAHQADANGQEIDFSK	K25:+32.0564 - V1:+32.0564 - T6:+79.96633	6	3 4 6	1	b35.a2.a1	1.4e-14	3	2747.31	2747.31	-0.0004	-0.145597
b36	b36.a1	pepb36a1a1	27_T3_1a_HCDOT	6193	22.86	KPVEETSVPVGHK	K1:+28.0313 - K13:+28.0313 - K1:+28.0313 - T6:+79.96633	6	6 7	1	b36.a1.a1	0.00021	3	1570.83	1570.82	0.002	1.27322
b36	b36.a1	pepb36a1a1	01_T1_1a_HCDOT	6705	22.73	KPVEETSVPVGHK	K1:+28.0313 - K13:+28.0313 - K1:+28.0313 - T6:+79.96633	6	6 7	1	b36.a1.a1	0.00013	3	1570.83	1570.82	0.002	1.27322
b36	b36.a1	pepb36a1a1	15_T2_1b_HCDOT	7505	22.73	KPVEETSVPVGHK	K1:+28.0313 - K13:+28.0313 - K1:+28.0313 - T6:+79.96633	6	6 7	1	b36.a1.a1	0.00035	3	1570.82	1570.82	-0.0006	-0.381965
b36	b36.a1	pepb36a1a1	02_T1_1b_HCDOT	7974	22.83	KPVEETSVPVGHK	K1:+28.0313 - K13:+28.0313 - K1:+28.0313 - S7:+79.96633	7	6 7	1	b36.a1.a1	0.00081	3	1570.83	1570.82	0.0018	1.1459
b36	b36.a1	pepb36a1a1	40_T4_1a_HCDOT	6102	22.85	KPVEETSVPVGHK	K1:+28.0313 - K13:+28.0313 - K1:+28.0313 - S7:+79.96633	7	6 7	1	b36.a1.a1	0.00022	3	1570.83	1570.82	0.0033	2.10081
b36	b36.a1	pepb36a1a1	14_T2_1a_HCDOT	6509	22.5	KPVEETSVPVGHK	K1:+28.0313 - K13:+28.0313 - K1:+28.0313 - S7:+79.96633	7	6 7	1	b36.a1.a1	0.00093	3	1570.83	1570.82	0.0009	0.572948
b36	b36.a1	pepb36a1a2	41_T4_1b_HCDOT	6563	23.05	KPVEETSVPVGHK	K1:+32.0564 - K13:+32.0564 - K1:+32.0564 - S7:+79.96633	7	6 7	1	b36.a1.a1	1.6e-05	3	1582.9	1582.9	0.001	0.631752
b36	b36.a1	pepb36a1a2	14_T2_1a_HCDOT	6495	22.46	KPVEETSVPVGHK	K1:+32.0564 - K13:+32.0564 - K1:+32.0564 - T6:+79.96633	6	6 7	1	b36.a1.a1	5.4e-05	3	1582.9	1582.9	0.0005	0.315876
b36	b36.a1	pepb36a1a2	15_T2_1b_HCDOT	7474	22.68	KPVEETSVPVGHK	K1:+32.0564 - K13:+32.0564 - K1:+32.0564 - T6:+79.96633	6	6 7	1	b36.a1.a1	2.2e-05	3	1582.9	1582.9	-0.0003	-0.189526
b36	b36.a1	pepb36a1a3	28_T3_1b_HCDOT	6532	23.03	KPVEETSVPVGHK	K1:+36.0756 - K13:+36.0756 - K1:+36.0756 - T6:+79.96633	6	6 7	1	b36.a1.a1	0.0007	3	1594.96	1594.96	0.0028	1.75553
b37	b37.a1	pepb37a1a3	14_T2_1a_HCDOT	23237	48.06	SFIDKGELVPDEVTNGIVK	K5:+36.0756 - K19:+36.0756 - S1:+36.0756 - S1:+79.96633	1	1	1	b37.a1.a1	1.1e-05	3	2248.29	2248.28	0.001	0.444784
b37	b37.a1	pepb37a1a3	02_T1_1b_HCDOT	25166	48.73	SFIDKGELVPDEVTNGIVK	K5:+36.0756 - K19:+36.0756 - S1:+36.0756 - S1:+79.96633	1	1	1	b37.a1.a1	2e-07	3	2248.29	2248.28	0.0094	4.18097
b37	b37.a1	pepb37a1a3	02_T1_1b_HCDOT	25112	48.65	SFIDKGELVPDEVTNGIVK	K5:+36.0756 - K19:+36.0756 - S1:+36.0756 - S1:+79.96633	1	1	1	b37.a1.a1	9.1e-07	3	2248.29	2248.28	0.0023	1.023
b37	b37.a1	pepb37a1a3	15_T2_1b_HCDOT	23840	48.36	SFIDKGELVPDEVTNGIVK	K5:+36.0756 - K19:+36.0756 - S1:+36.0756 - S1:+79.96633	1	1	1	b37.a1.a1	7.3e-07	3	2248.29	2248.28	0.0017	0.756132
b37	b37.a1	pepb37a1a3	15_T2_1b_HCDOT	23800	48.3	SFIDKGELVPDEVTNGIVK	K5:+36.0756 - K19:+36.0756 - S1:+36.0756 - S1:+79.96633	1	1	1	b37.a1.a1	7.2e-08	3	2248.29	2248.28	0.0045	2.00153
b37	b37.a1	pepb37a1a3	01_T1_1a_HCDOT	23794	48.28	SFIDKGELVPDEVTNGIVK	K5:+36.0756 - K19:+36.0756 - S1:+36.0756 - S1:+79.96633	1	1	1	b37.a1.a1	7e-07	3	2248.29	2248.28	0.0039	1.73466
b37	b37.a1	pepb37a1a2	14_T2_1a_HCDOT	23209	48.03	SFIDKGELVPDEVTNGIVK	K5:+32.0564 - K19:+32.0564 - S1:+32.0564 - S1:+79.96633	1	1	1	b37.a1.a1	1.2e-07	3	2236.23	2236.23	0.0004	0.178873
b37	b37.a1	pepb37a1a2	15_T2_1b_HCDOT	23851	48.38	SFIDKGELVPDEVTNGIVK	K5:+32.0564 - K19:+32.0564 - S1:+32.0564 - S1:+79.96633	1	1	1	b37.a1.a1	9.3e-07	3	2236.23	2236.23	0.0015	0.670773
b37	b37.a1	pepb37a1a2	01_T1_1a_HCDOT	23863	48.38	SFIDKGELVPDEVTNGIVK	K5:+32.0564 - K19:+32.0564 - S1:+32.0564 - S1:+79.96633	1	1	1	b37.a1.a1	1.3e-10	3	2236.23	2236.23	0.0013	0.581336
b37	b37.a1	pepb37a1a1	02_T1_1b_HCDOT	25196	48.76	SFIDKGELVPDEVTNGIVK	K5:+28.0313 - K19:+28.0313 - S1:+28.0313 - S1:+79.96633	1	1	1	b37.a1.a1	6.3e-05	3	2224.15	2224.15	0.0013	0.584493
b38	b38.a1	pepb38a1a3	27_T3_1a_HCDOT	16451	39.23	IGETHEGASQMDWMEQEQER	I1:+36.0756 - T4:+79.96633	4	4	1	b38.a1.a1	3.2e-12	3	2507.04	2507.04	0.0015	0.598315
b38	b38.a1	pepb38a1a3	28_T3_1b_HCDOT	16461	39.33	IGETHEGASQMDWMEQEQER	I1:+36.0756 - T4:+79.96633	4	4	1	b38.a1.a1	7.3e-10	3	2507.04	2507.04	0.004	1.59551
b38	b38.a1	pepb38a1a3	02_T1_1b_HCDOT	19054	39.53	IGETHEGASQMDWMEQEQER	I1:+36.0756 - T4:+79.96633	4	4	1	b38.a1.a1	2.1e-09	3	2507.04	2507.04	0.0038	1.51573
b38	b38.a1	pepb38a1a3	01_T1_1a_HCDOT	17711	39.21	IGETHEGASQMDWMEQEQER	I1:+36.0756 - T4:+79.96633	4	4	1	b38.a1.a1	9.2e-12	3	2507.04	2507.04	-0.0007	-0.279214
b38	b38.a1	pepb38a1a2	14_T2_1a_HCDOT	17234	38.96	IGETHEGASQMDWMEQEQER	I1:+32.0564 - T4:+79.96633	4	4 9	1	b38.a1.a1	1e-08	3	2503.02	2503.02	0.0019	0.759083
b38	b38.a1	pepb38a1a2	40_T4_1a_HCDOT	16288	39.2	IGETHEGASQMDWMEQEQER	I1:+32.0564 - T4:+79.96633	4	4 9	1	b38.a1.a1	3e-07	3	2503.03	2503.02	0.005	1.99759
b38	b38.a1	pepb38a1a2	27_T3_1a_HCDOT	16676	39.6	IGETHEGASQMDWMEQEQER	I1:+32.0564 - S9:+79.96633	9	4 9	1	b38.a1.a1	9.2e-07	3	2503.02	2503.02	-0.0033	-1.31841
b38	b38.a1	pepb38a1a1	28_T3_1b_HCDOT	16482	39.36	IGETHEGASQMDWMEQEQER	I1:+28.0313 - S9:+79.96633	9	4 9	1	b38.a1.a1	2.3e-06	3	2499	2499	0.0021	0.840338
b38	b38.a1	pepb38a1a1	27_T3_1a_HCDOT	16477	39.28	IGETHEGASQMDWMEQEQER	I1:+28.0313 - S9:+79.96633	9	4 9	1	b38.a1.a1	1.4e-07	3	2499	2499	0.0049	1.96079
b39	b39.a1	pepb39a1a3	28_T3_1b_HCDOT	26849	55.53	EIVHLGLEDNNFDSDINPLETTGAYLSPK	K29:+36.0756 - E1:+36.0756 - T21:+79.96633	21	21 22	1	b39.a1.a1	1e-15	3	3353.67	3353.68	-0.0033	-0.983995
b39	b39.a1	pepb39a1a3	01_T1_1a_HCDOT	28779	55.73	EIVHLGLEDNNFDSDINPLETTGAYLSPK	K29:+36.0756 - E1:+36.0756 - T21:+79.96633	21	21 22	1	b39.a1.a1	2.4e-10	3	3353.69	3353.68	0.018	5.36724
b39	b39.a1	pepb39a1a3	27_T3_1a_HCDOT	26955	55.4	EIVHLGLEDNNFDSDINPLETTGAYLSPK	K29:+36.0756 - E1:+36.0756 - T21:+79.96633	21	21 22	1	b39.a1.a1	8.6e-13	3	3353.67	3353.68	-0.0018	-0.536724
b39	b39.a1	pepb39a1a1	28_T3_1b_HCDOT	26852	55.55	EIVHLGLEDNNFDSDINPLETTGAYLSPK	K29:+28.0313 - E1:+28.0313 - T22:+79.96633	22	21 22	1	b39.a1.a1	1.4e-13	3	3337.59	3337.59	0.0021	0.629197
b39	b39.a1	pepb39a1a1	40_T4_1a_HCDOT	27047	55.7	EIVHLGLEDNNFDSDINPLETTGAYLSPK	K29:+28.0313 - E1:+28.0313 - T21:+79.96633	21	21 22	1	b39.a1.a1	3.4e-05	3	3337.59	3337.59	0.0039	1.16851
b39	b39.a1	pepb39a1a1	15_T2_1b_HCDOT	28551	55.46	EIVHLGLEDNNFDSDINPLETTGAYLSPK	K29:+28.0313 - E1:+28.0313 - T21:+79.96633	21	21 22	1	b39.a1.a1	4.4e-10	3	3337.59	3337.59	0.0002	0.0599235
b39	b39.a1	pepb39a1a1	02_T1_1b_HCDOT	29911	55.85	EIVHLGLEDNNFDSDINPLETTGAYLSPK	K29:+28.0313 - E1:+28.0313 - T22:+79.96633	22	21 22	1	b39.a1.a1	1.2e-11	3	3337.59	3337.59	0.0002	0.0599235
b39	b39.a1	pepb39a1a2	40_T4_1a_HCDOT	26962	55.58	EIVHLGLEDNNFDSDINPLETTGAYLSPK	K29:+32.0564 - E1:+32.0564 - T22:+79.96633	22	21 22	1	b39.a1.a1	2.7e-15	3	3345.65	3345.64	0.014	4.18455
b39	b39.a1	pepb39a1a2	14_T2_1a_HCDOT	28048	55.25	EIVHLGLEDNNFDSDINPLETTGAYLSPK	K29:+32.0564 - E1:+32.0564 - T21:+79.96633	21	21 22	1	b39.a1.a1	1e-15	3	3345.64	3345.64	0.0027	0.807021
b40	b40.a1	pepb40a1a1	27_T3_1a_HCDOT	21019	46.4	FDSILTDNGATVVESK	K16:+28.0313 - F1:+28.0313 - S3:+79.96633	3	3	1	b40.a1.a1	6.1e-07	2	1831.87	1831.87	0.0009	0.4913
b40	b40.a1	pepb40a1a1	01_T1_1a_HCDOT	22623	46.55	FDSILTDNGATVVESK	K16:+28.0313 - F1:+28.0313 - S3:+79.96633	3	3	1	b40.a1.a1	1e-15	2	1831.87	1831.87	0.0018	0.982601
b40	b40.a1	pepb40a1a2	40_T4_1a_HCDOT	20907	46.45	FDSILTDNGATVVESK	K16:+32.0564 - F1:+32.0564 - S3:+79.96633	3	3	1	b40.a1.a1	5.2e-11	2	1839.93	1839.92	0.0059	3.20666
b40	b40.a1	pepb40a1a2	15_T2_1b_HCDOT	22502	46.35	FDSILTDNGATVVESK	K16:+32.0564 - F1:+32.0564 - S3:+79.96633	3	3	1	b40.a1.a1	0.00059	2	1839.93	1839.92	0.0045	2.44575
b40	b40.a1	pepb40a1a2	28_T3_1b_HCDOT	20916	46.41	FDSILTDNGATVVESK	K16:+32.0564 - F1:+32.0564 - S3:+79.96633	3	3	1	b40.a1.a1	0.00071	2	1839.92	1839.92	0.0017	0.923952
b40	b40.a1	pepb40a1a2	41_T4_1b_HCDOT	21136	46.55	FDSILTDNGATVVESK	K16:+32.0564 - F1:+32.0564 - S3:+79.96633	3	3	1	b40.a1.a1	4.7e-11	2	1839.92	1839.92	-0.0004	-0.2174
b40	b40.a1	pepb40a1a2	02_T1_1b_HCDOT	23788	46.68	FDSILTDNGATVVESK	K16:+32.0564 - F1:+32.0564 - S3:+79.96633	3	3	1	b40.a1.a1	1.6e-05	2	1839.93	1839.92	0.0059	3.20666
b40	b40.a1	pepb40a1a2	27_T3_1a_HCDOT	20995	46.36	FDSILTDNGATVVESK	K16:+32.0564 - F1:+32.0564 - S3:+79.96633	3	3	1	b40.a1.a1	4.8e-06	2	1839.93	1839.92	0.0026	1.4131
b41	b41.a1	pepb41a1a3	03_T1_2a_HCDOT	13099	34.25	TGTVTMDVAK	K10:+36.0756 - T1:+36.0756 - T5:+79.96633	5	5	1	b41.a1.a1	0.00012	2	1174.64	1174.64	0.0022	1.87292
b41	b41.a1	pepb41a1a3	01_T1_1a_HCDOT	14086	33.91	TGTVTMDVAK	K10:+36.0756 - T1:+36.0756 - T5:+79.96633	5	5	1	b41.a1.a1	0.0009	2	1174.64	1174.64	0.0021	1.78779
b41	b41.a1	pepb41a1a3	04_T1_2b_HCDOT	12508	34.2	TGTVTMDVAK	K10:+36.0756 - T1:+36.0756 - T5:+79.96633	5	5	1	b41.a1.a1	0.00021	2	1174.64	1174.64	0.0023	1.95805
b41	b41.a1	pepb41a1a3	02_T1_1b_HCDOT	15344	34.01	TGTVTMDVAK	K10:+36.0756 - T1:+36.0756 - T5:+79.96633	5	5	1	b41.a1.a1	0.00015	2	1174.64	1174.64	0.0018	1.53239
b41	b41.a1	pepb41a1a2	01_T1_1a_HCDOT	14089	33.91	TGTVTMDVAK	K10:+32.0564 - T1:+32.0564 - T5:+79.96633	5	5	1	b41.a1.a1	0.00034	2	1166.6	1166.6	0.0024	2.05726
b41	b41.a1	pepb41a1a1	01_T1_1a_HCDOT	14137	34	TGTVTMDVAK	K10:+28.0313 - T1:+28.0313 - T5:+79.96633	5	5	1	b41.a1.a1	0.00072	2	1158.55	1158.55	0.0024	2.07156
b42	b42.a1	pepb42a1a1	01_T1_1a_HCDOT	21092	44.3	HSNETVEFEGETYPLIR	H1:+28.0313 - T5:+79.96633	5	5	1	b42.a1.a1	1.2e-08	2	2128.96	2128.96	0.0028	1.3152
b42	b42.a1	pepb42a1a1	01_T1_1a_HCDOT	21098	44.31	HSNETVEFEGETYPLIR	H1:+28.0313 - T5:+79.96633	5	5	1	b42.a1.a1	2e-06	3	2128.96	2128.96	0.0025	1.17428
b42	b42.a1	pepb42a1a3	02_T1_1b_HCDOT	22537	44.85	HSNETVEFEGETYPLIR	H1:+36.0756 - T5:+79.96633	5	5	1	b42.a1.a1	9.3e-08	3	2137.01	2137	0.0033	1.54422
b42	b42.a1	pepb42a1a2	14_T2_1a_HCDOT	20524	44.03	HSNETVEFEGETYPLIR	H1:+32.0564 - S2:+79.96633	2	2 5	1	b42.a1.a1	4.8e-07	3	2132.99	2132.98	0.0017	0.797005
b42	b42.a2	pepb42a2a4	01_T1_1a_HCDOT	15668	36.21	VEISSDSHPFYTGR	V1:+32.0564 - S4:+79.96633	4	4	1	b42.a2.a1	4.8e-11	2	1706.77	1706.77	0.0017	0.996032
b42	b42.a2	pepb42a2a4	14_T2_1a_HCDOT	15233	35.95	VEISSDSHPFYTGR	V1:+32.0564 - S4:+79.96633	4	4	1	b42.a2.a1	1.7e-06	2	1706.77	1706.77	0.0012	0.703081
b43	b43.a1	pepb43a1a1	14_T2_1a_HCDOT	29591	57.56	MNTDETITIYDVAR	M1:+28.0313 - M1:+15.99491 - T3:+79.96633 - M1:+42.01057	3	3	1	b43.a1.a1	1.1e-10	2	1807.78	1807.78	-0.0001	-0.0553164
b43	b43.a1	pepb43a1a1	01_T1_1a_HCDOT	30095	57.73	MNTDETITIYDVAR	M1:+28.0313 - M1:+15.99491 - T3:+79.96633 - M1:+42.01057	3	3	1	b43.a1.a1	7.7e-13	2	1807.79	1807.78	0.0046	2.54455
b43	b43.a1	pepb43a1a1	40_T4_1a_HCDOT	28312	57.61	MNTDETITIYDVAR	M1:+28.0313 - M1:+15.99491 - T3:+79.96633 - M1:+42.01057	3	3	1	b43.a1.a1	4.5e-11	2	1807.79	1807.78	0.0042	2.32329
b43	b43.a1	pepb43a1a1	28_T3_1b_HCDOT	28077	57.43	MNTDETITIYDVAR	M1:+28.0313 - M1:+15.99491 - T3:+79.96633 - M1:+42.01057	3	3	1	b43.a1.a1	3.2e-08	2	1807.78	1807.78	0.0026	1.43823
b43	b43.a1	pepb43a1a2	02_T1_1b_HCDOT	30902	57.35	MNTDETITIYDVAR	M1:+32.0564 - M1:+15.99491 - T3:+79.96633 - M1:+42.01057	3	3	1	b43.a1.a1	3.8e-11	2	1811.81	1811.81	0.0021	1.15906
b43	b43.a1	pepb43a1a2	14_T2_1a_HCDOT	29305	57.15	MNTDETITIYDVAR	M1:+32.0564 - M1:+15.99491 - T3:+79.96633 - M1:+42.01057	3	3	1	b43.a1.a1	7.5e-09	2	1811.81	1811.81	-0.0019	-1.04868
b44	b44.a1	pepb44a1a2	28_T3_1b_HCDOT	9827	28.55	TGKLPGNQGEAVNPTQQHGPK	K3:+32.0564 - K21:+32.0564 - T1:+32.0564 - T1:+79.96633	1	1	1	b44.a1.a1	0.00013	3	2334.25	2334.24	0.012	5.14087
b44	b44.a1	pepb44a1a2	27_T3_1a_HCDOT	9190	27.78	TGKLPGNQGEAVNPTQQHGPK	K3:+32.0564 - K21:+32.0564 - T1:+32.0564 - T1:+79.96633	1	1	1	b44.a1.a1	3.3e-05	3	2334.25	2334.24	0.011	4.71246
b44	b44.a1	pepb44a1a2	28_T3_1b_HCDOT	9426	27.85	TGKLPGNQGEAVNPTQQHGPK	K3:+32.0564 - K21:+32.0564 - T1:+32.0564 - T1:+79.96633	1	1	1	b44.a1.a1	9.5e-08	3	2334.25	2334.24	0.015	6.42609
b44	b44.a2	pepb44a2a1	40_T4_1a_HCDOT	20198	45.36	LIGTTAGYVGYDDNSNTLTER	L1:+32.0564 - T4:+79.96633	4	4 5 11 15	1	b44.a2.a1	2.1e-05	2	2372.1	2372.1	0.0042	1.77059
b44	b44.a2	pepb44a2a1	41_T4_1b_HCDOT	20183	45.11	LIGTTAGYVGYDDNSNTLTER	L1:+32.0564 - S15:+79.96633	15	4 5 11 15	1	b44.a2.a1	0.00022	2	2372.1	2372.1	0.0088	3.7098
b45	b45.a1	pepb45a1a2	01_T1_1a_HCDOT	19559	42.01	SQLDFDTNTITEK	K13:+36.0756 - S1:+36.0756 - T9:+79.96633	9	7 9	1	b45.a1.a1	7.1e-06	2	1663.84	1663.84	0.0004	0.240408
b45	b45.a1	pepb45a1a2	27_T3_1a_HCDOT	18181	42	SQLDFDTNTITEK	K13:+36.0756 - S1:+36.0756 - T9:+79.96633	9	7 9	1	b45.a1.a1	3.1e-05	2	1663.84	1663.84	0.0033	1.98336
b45	b45.a1	pepb45a1a1	14_T2_1a_HCDOT	19067	41.8	SQLDFDTNTITEK	K13:+32.0564 - S1:+32.0564 - T9:+79.96633	9	7 9	1	b45.a1.a1	1.1e-08	2	1655.8	1655.8	-0.0011	-0.664331
b45	b45.a1	pepb45a1a1	15_T2_1b_HCDOT	19602	41.88	SQLDFDTNTITEK	K13:+32.0564 - S1:+32.0564 - T9:+79.96633	9	7 9	1	b45.a1.a1	1.8e-06	2	1655.8	1655.8	-0.0036	-2.17417
b45	b45.a2	pepb45a2a3	02_T1_1b_HCDOT	7308	21.8	YMNEKPVAK	K5:+36.0756 - K9:+36.0756 - Y1:+36.0756 - Y1:+79.96633	1	1	1	b45.a2.a1	3.8e-05	2	1267.75	1267.75	0.0024	1.89312
b46	b46.a1	pepb46a1a4	04_T1_2b_HCDOT	16226	40.81	SGTTTEPAIAFR	S1:+36.0756 - T4:+79.96633	4	4	1	b46.a1.a1	4.4e-05	2	1366.68	1366.68	0.0018	1.31706
b46	b46.a1	pepb46a1a4	28_T3_1b_HCDOT	17185	40.55	SGTTTEPAIAFR	S1:+36.0756 - T4:+79.96633	4	4	1	b46.a1.a1	5.7e-05	2	1366.68	1366.68	0.0004	0.29268
b46	b46.a1	pepb46a1a2	14_T2_1a_HCDOT	18061	40.25	SGTTTEPAIAFR	S1:+28.0313 - T4:+79.96633	4	4	1	b46.a1.a1	0.00028	2	1358.64	1358.64	-0.0002	-0.147207
b46	b46.a1	pepb46a1a3	27_T3_1a_HCDOT	17254	40.55	SGTTTEPAIAFR	S1:+32.0564 - T4:+79.96633	4	4	1	b46.a1.a1	0.00021	2	1362.66	1362.66	0.001	0.733858
b46	b46.a2	pepb46a2a1	41_T4_1b_HCDOT	26900	55.3	QLAGESEGKDQRGIYPTSANFSTDLHSLGQFIQEGTR	K9:+28.0313 - Q1:+28.0313 - T17:+79.96633 - Q1:-17.02655	17	17 18 22 23	1	b46.a2.a1	1e-09	3	4156.99	4156.96	0.031	7.45737
b47	b47.a1	pepb47a1a1	01_T1_1a_HCDOT	18003	39.65	ATETTEEVVEETKETSELEEAQAR	K13:+32.0564 - A1:+32.0564 - T4:+79.96633 - A1:+42.01056	4	2 4 5 12	1	b47.a1.a1	0.00047	3	2895.37	2895.35	0.025	8.63454
b47	b47.a1	pepb47a1a1	14_T2_1a_HCDOT	17565	39.48	ATETTEEVVEETKETSELEEAQAR	K13:+32.0564 - A1:+32.0564 - T2:+79.96633 - A1:+42.01056	2	2 4 5 12	1	b47.a1.a1	1.7e-05	3	2895.37	2895.35	0.02	6.90763
b47	b47.a1	pepb47a1a1	03_T1_2a_HCDOT	16518	40.21	ATETTEEVVEETKETSELEEAQAR	K13:+32.0564 - A1:+32.0564 - T2:+79.96633 - A1:+42.01056	2	2 4 5 12	1	b47.a1.a1	0.00025	3	2895.37	2895.35	0.025	8.63454
b47	b47.a2	pepb47a2a2	41_T4_1b_HCDOT	23662	50.4	MTEDIKEEEVKEEEATETTEEVVEETK	K6:+28.0313 - K11:+28.0313 - K27:+28.0313 - M1:+28.0313 - M1:+15.99491 - T2:+79.96633 - M1:+42.01057	2	2	1	b47.a2.a1	0.0007	3	3434.54	3434.54	-0.0042	-1.22287
b47	b47.a2	pepb47a2a2	02_T1_1b_HCDOT	26332	50.48	MTEDIKEEEVKEEEATETTEEVVEETK	K6:+28.0313 - K11:+28.0313 - K27:+28.0313 - M1:+28.0313 - M1:+15.99491 - T2:+79.96633 - M1:+42.01057	2	2	1	b47.a2.a1	6.8e-06	3	3434.55	3434.54	0.0082	2.38751
b48	b48.a1	pepb48a1a2	04_T1_2b_HCDOT	21747	50.25	YFESLEEFSEGEMK	K14:+36.0756 - Y1:+36.0756 - S9:+79.96633	9	9	1	b48.a1.a1	5.9e-05	2	1876.86	1876.85	0.0035	1.86482
b48	b48.a1	pepb48a1a2	02_T1_1b_HCDOT	26152	50.21	YFESLEEFSEGEMK	K14:+36.0756 - Y1:+36.0756 - S9:+79.96633	9	9	1	b48.a1.a1	1.4e-06	2	1876.86	1876.85	0.0052	2.77059
b48	b48.a1	pepb48a1a2	28_T3_1b_HCDOT	23212	49.95	YFESLEEFSEGEMK	K14:+36.0756 - Y1:+36.0756 - S9:+79.96633	9	9	1	b48.a1.a1	0.00013	2	1876.86	1876.85	0.0033	1.75826
b48	b48.a1	pepb48a1a1	14_T2_1a_HCDOT	24339	49.73	YFESLEEFSEGEMK	K14:+32.0564 - Y1:+32.0564 - S9:+79.96633	9	9	1	b48.a1.a1	3.7e-05	2	1868.82	1868.82	0.0032	1.71231
b48	b48.a1	pepb48a1a1	15_T2_1b_HCDOT	24843	49.88	YFESLEEFSEGEMK	K14:+32.0564 - Y1:+32.0564 - S9:+79.96633	9	9	1	b48.a1.a1	5.9e-05	2	1868.82	1868.82	0.0014	0.749138
b49	b49.a1	pepb49a1a1	01_T1_1a_HCDOT	29047	56.15	ANGALELVIKPYDTYQIFDSNGEPISSEQK	K10:+28.0313 - K30:+28.0313 - A1:+28.0313 - S26:+79.96633	26	26 27	1	b49.a1.a1	7.2e-08	3	3490.7	3490.7	0.0006	0.171885
b49	b49.a1	pepb49a1a1	14_T2_1a_HCDOT	28414	55.8	ANGALELVIKPYDTYQIFDSNGEPISSEQK	K10:+28.0313 - K30:+28.0313 - A1:+28.0313 - S26:+79.96633	26	26 27	1	b49.a1.a1	1.1e-07	3	3490.7	3490.7	-0.0071	-2.03397
b49	b49.a1	pepb49a1a2	15_T2_1b_HCDOT	28901	56	ANGALELVIKPYDTYQIFDSNGEPISSEQK	K10:+32.0564 - K30:+32.0564 - A1:+32.0564 - S26:+79.96633	26	26 27	1	b49.a1.a1	3.3e-09	3	3502.78	3502.78	0.0004	0.114195
b49	b49.a1	pepb49a1a2	14_T2_1a_HCDOT	28318	55.65	ANGALELVIKPYDTYQIFDSNGEPISSEQK	K10:+32.0564 - K30:+32.0564 - A1:+32.0564 - S27:+79.96633	27	26 27	1	b49.a1.a1	1e-15	3	3502.79	3502.78	0.012	3.42585
b49	b49.a1	pepb49a1a3	14_T2_1a_HCDOT	28381	55.75	ANGALELVIKPYDTYQIFDSNGEPISSEQK	K10:+36.0756 - K30:+36.0756 - A1:+36.0756 - S26:+79.96633	26	26 27	1	b49.a1.a1	5.3e-06	3	3514.85	3514.84	0.017	4.83664
b50	b50.a1	pepb50a1a1	40_T4_1a_HCDOT	15675	38.25	VTSASASRPAYASATSEPSHATGNIASASNYDILK	K35:+28.0313 - V1:+28.0313 - T22:+79.96633	22	15 16 22	1	b50.a1.a1	0.00012	3	3631.74	3631.73	0.0071	1.95499
b50	b50.a1	pepb50a1a1	01_T1_1a_HCDOT	16910	38.05	VTSASASRPAYASATSEPSHATGNIASASNYDILK	K35:+28.0313 - V1:+28.0313 - T22:+79.96633	22	15 16 22	1	b50.a1.a1	1e-15	3	3631.73	3631.73	0.0049	1.34922
b50	b50.a1	pepb50a1a1	41_T4_1b_HCDOT	16790	39.71	VTSASASRPAYASATSEPSHATGNIASASNYDILK	K35:+28.0313 - V1:+28.0313 - S16:+79.96633	16	15 16 22	1	b50.a1.a1	0.00028	3	3631.74	3631.73	0.011	3.02886
b50	b50.a1	pepb50a1a2	01_T1_1a_HCDOT	17515	38.93	VTSASASRPAYASATSEPSHATGNIASASNYDILK	K35:+36.0756 - V1:+36.0756 - S13:+79.96633	13	11 13 15 16	1	b50.a1.a1	6.8e-06	3	3647.83	3647.82	0.011	3.0155
b51	b51.a1	pepb51a1a2	14_T2_1a_HCDOT	21973	46.2	VAEIGVSYAGTPVLAHELASK	K21:+32.0564 - V1:+32.0564 - S20:+79.96633	20	11 20	1	b51.a1.a1	7.5e-06	3	2256.22	2256.21	0.0022	0.975085
b51	b51.a1	pepb51a1a2	01_T1_1a_HCDOT	22553	46.43	VAEIGVSYAGTPVLAHELASK	K21:+32.0564 - V1:+32.0564 - T11:+79.96633	11	11 20	1	b51.a1.a1	1.3e-05	3	2256.22	2256.21	0.006	2.65932
b51	b51.a1	pepb51a1a2	15_T2_1b_HCDOT	22639	46.56	VAEIGVSYAGTPVLAHELASK	K21:+32.0564 - V1:+32.0564 - T11:+79.96633	11	11 20	1	b51.a1.a1	0.00049	3	2256.22	2256.21	0.0028	1.24102
b51	b51.a2	pepb51a2a1	01_T1_1a_HCDOT	10929	29.21	TIEPELVEK	K9:+36.0756 - T1:+36.0756 - T1:+79.96633 - T1:+42.01056	1	1	1	b51.a2.a1	0.00097	2	1251.7	1251.71	-0.0063	-5.03313
b52	b52.a1	pepb52a1a2	15_T2_1b_HCDOT	26670	52.63	DGGVDIVTSSLPSDIKDAVVK	K16:+32.0564 - K21:+32.0564 - D1:+32.0564 - T8:+79.96633	8	8	1	b52.a1.a1	4.3e-06	3	2291.26	2291.25	0.003	1.30933
b52	b52.a1	pepb52a1a3	28_T3_1b_HCDOT	25016	52.7	DGGVDIVTSSLPSDIKDAVVK	K16:+36.0756 - K21:+36.0756 - D1:+36.0756 - T8:+79.96633	8	8	1	b52.a1.a1	0.00013	3	2303.31	2303.31	-0.0002	-0.0868315
b52	b52.a1	pepb52a1a3	27_T3_1a_HCDOT	25098	52.56	DGGVDIVTSSLPSDIKDAVVK	K16:+36.0756 - K21:+36.0756 - D1:+36.0756 - T8:+79.96633	8	8	1	b52.a1.a1	1.3e-08	3	2303.31	2303.31	0.0029	1.25906
b52	b52.a1	pepb52a1a1	40_T4_1a_HCDOT	25111	52.78	DGGVDIVTSSLPSDIKDAVVK	K16:+28.0313 - K21:+28.0313 - D1:+28.0313 - T8:+79.96633	8	8 9	1	b52.a1.a1	0.00034	3	2279.18	2279.18	0.0038	1.66727
b53	b53.a1	pepb53a1a2	02_T1_1b_HCDOT	28919	54.33	GATVTGSGKPATLETGLVVNVPDFIEAGQK	K9:+36.0756 - K30:+36.0756 - G1:+36.0756 - T5:+79.96633	5	3 5 7	1	b53.a1.a1	1.7e-10	3	3144.76	3144.76	0.0066	2.09873
b53	b53.a1	pepb53a1a2	28_T3_1b_HCDOT	25888	54.03	GATVTGSGKPATLETGLVVNVPDFIEAGQK	K9:+36.0756 - K30:+36.0756 - G1:+36.0756 - T3:+79.96633	3	3 5 7	1	b53.a1.a1	2.5e-12	3	3144.76	3144.76	0.0066	2.09873
b53	b53.a1	pepb53a1a2	01_T1_1a_HCDOT	27654	54.03	GATVTGSGKPATLETGLVVNVPDFIEAGQK	K9:+36.0756 - K30:+36.0756 - G1:+36.0756 - S7:+79.96633	7	3 5 7	1	b53.a1.a1	6.1e-06	3	3144.76	3144.76	0.007	2.22593
b53	b53.a1	pepb53a1a1	41_T4_1b_HCDOT	26403	54.53	GATVTGSGKPATLETGLVVNVPDFIEAGQK	K9:+32.0564 - K30:+32.0564 - G1:+32.0564 - T5:+79.96633	5	3 5 7	1	b53.a1.a1	5.3e-09	3	3132.7	3132.7	0.0042	1.3407
[truncated: 85 more rows]

## Sheet: phosho stats
total number of sample/scan	1665
total number of phosphorylations per residue
[truncated: 3 more rows]
