# Supplementary material for: Identification of Hanks-Type Kinase PknB-Specific Targets in the Streptococcus thermophilus Phosphoproteome
Source: Front Microbiol. 2019 Jun 19;10:1329. doi: 10.3389/fmicb.2019.01329 (PMC6593474; doi:10.3389/fmicb.2019.01329)
Supplement: TABLE S3 — Spectral counting of phosphopeptides: present/absent in WT/Mutant by sample and genotype. [file Table_3.XLSX]

## Sheet: compare.phosphopeptides.initial
		Supporting information Table S3. Spectral counting of phosphopeptides present in the all samples (light/inter/heavy)
		Filter list proteins: proteins filtered from original list of X!TandemPipeline. Here we conserved only phosphopeptides with a maximum peptide Evalue = O.001
		338 phosphopeptides
Informations Table
Num pep	number of the peptide
sequence	phosphopeptide sequence
liste.modifs	localization of phosphosite
Sub-group ID	name of the sub group
Top phosphoisland protein	name of the protein phosphorylated
numpep	sequence	liste.modifs	Sub-group ID	Top PhosphoIsland protein	01_T1_1a_HCDOT - heavy	01_T1_1a_HCDOT - inter	01_T1_1a_HCDOT - light	02_T1_1b_HCDOT - heavy	02_T1_1b_HCDOT - inter	02_T1_1b_HCDOT - light	03_T1_2a_HCDOT - heavy	03_T1_2a_HCDOT - inter	03_T1_2a_HCDOT - light	04_T1_2b_HCDOT - heavy	04_T1_2b_HCDOT - inter	04_T1_2b_HCDOT - light	05_T1_3a_HCDOT - heavy	07_T1_4a_HCDOT - heavy	08_T1_4b_HCDOT - heavy	09_T1_5a_HCDOT - heavy	09_T1_5a_HCDOT - light	10_T1_5b_HCDOT - heavy	14_T2_1a_HCDOT - heavy	14_T2_1a_HCDOT - inter	14_T2_1a_HCDOT - light	15_T2_1b_HCDOT - heavy	15_T2_1b_HCDOT - inter	15_T2_1b_HCDOT - light	16_T2_2a_HCDOT - heavy	16_T2_2a_HCDOT - inter	16_T2_2a_HCDOT - light	17_T2_2b_HCDOT - heavy	17_T2_2b_HCDOT - inter	17_T2_2b_HCDOT - light	18_T2_3a_HCDOT - inter	19_T2_3b_HCDOT - inter	27_T3_1a_HCDOT - heavy	27_T3_1a_HCDOT - inter	27_T3_1a_HCDOT - light	28_T3_1b_HCDOT - heavy	28_T3_1b_HCDOT - inter	28_T3_1b_HCDOT - light	29_T3_2a_HCDOT - heavy	29_T3_2a_HCDOT - inter	29_T3_2a_HCDOT - light	30_T3_2b_HCDOT - heavy	30_T3_2b_HCDOT - light	31_T3_3a_HCDOT - heavy	31_T3_3a_HCDOT - light
1	YGSYGSYGSYGEYGKK	Y7:+79.96633	a1.a1	gi|116627844|ref|YP_820463.1|STER_1068|Tyrosine-protein kinase (capsular polysaccharide biosynthesis) [Streptococcus thermophilus LMD-9]_hit-name:epsD _hit-score:422_hit-evalue:1e-120_identity-percent:90.2439024390244	0	0	1	0	1	1	0	0	0	0	0	0	0	0	0	0	0	0	0	1	1	1	0	0	0	0	0	0	0	0	0	0	0	0	0	0	0	1	0	0	0	0	0	0	0
2	YGSYGSYGSYGEYGKK	Y13:+79.96633	a1.a1	gi|116627844|ref|YP_820463.1|STER_1068|Tyrosine-protein kinase (capsular polysaccharide biosynthesis) [Streptococcus thermophilus LMD-9]_hit-name:epsD _hit-score:422_hit-evalue:1e-120_identity-percent:90.2439024390244	0	0	1	2	1	1	0	1	1	0	1	1	0	0	0	0	0	0	1	1	1	1	2	2	0	0	0	0	0	0	0	0	2	3	2	2	4	3	0	0	0	0	0	0	0
3	YGSYGSYGSYGEYGKK	S9:+79.96633	a1.a1	gi|116627844|ref|YP_820463.1|STER_1068|Tyrosine-protein kinase (capsular polysaccharide biosynthesis) [Streptococcus thermophilus LMD-9]_hit-name:epsD _hit-score:422_hit-evalue:1e-120_identity-percent:90.2439024390244	1	0	1	1	0	0	0	0	0	0	0	0	0	0	0	0	0	0	0	0	0	1	0	1	0	0	0	0	0	0	0	0	0	0	0	0	0	1	0	0	0	0	0	0	0
4	YGSYGSYGSYGEYGKK	Y10:+79.96633	a1.a1	gi|116627844|ref|YP_820463.1|STER_1068|Tyrosine-protein kinase (capsular polysaccharide biosynthesis) [Streptococcus thermophilus LMD-9]_hit-name:epsD _hit-score:422_hit-evalue:1e-120_identity-percent:90.2439024390244	0	1	0	1	0	1	0	0	0	0	0	0	0	0	0	0	0	0	1	1	1	0	0	0	0	0	0	0	0	0	0	0	2	0	1	2	2	0	0	0	0	0	0	0	0
5	YGSYGSYGSYGEYGKK	S6:+79.96633	a1.a1	gi|116627844|ref|YP_820463.1|STER_1068|Tyrosine-protein kinase (capsular polysaccharide biosynthesis) [Streptococcus thermophilus LMD-9]_hit-name:epsD _hit-score:422_hit-evalue:1e-120_identity-percent:90.2439024390244	0	1	0	0	0	0	0	0	0	0	0	0	0	0	0	0	0	0	0	0	0	0	0	0	0	0	0	0	0	0	0	0	0	0	0	0	0	0	0	0	0	0	0	0	0
6	YGSYGSYGSYGEYGKK	Y7:+79.96633 - Y10:+79.96633	a1.a1	gi|116627844|ref|YP_820463.1|STER_1068|Tyrosine-protein kinase (capsular polysaccharide biosynthesis) [Streptococcus thermophilus LMD-9]_hit-name:epsD _hit-score:422_hit-evalue:1e-120_identity-percent:90.2439024390244	0	0	0	0	0	0	0	0	0	0	0	0	0	0	0	0	0	0	0	0	0	0	0	0	0	0	0	0	0	0	0	0	0	0	0	0	0	0	0	0	0	0	0	0	0
7	YGSYGSYGSYGEYGKK	Y4:+79.96633 - Y13:+79.96633	a1.a1	gi|116627844|ref|YP_820463.1|STER_1068|Tyrosine-protein kinase (capsular polysaccharide biosynthesis) [Streptococcus thermophilus LMD-9]_hit-name:epsD _hit-score:422_hit-evalue:1e-120_identity-percent:90.2439024390244	0	0	1	0	0	0	0	0	0	0	0	0	0	0	0	0	0	0	0	0	0	0	0	0	0	0	0	0	0	0	0	0	0	0	1	1	1	1	0	0	0	0	0	0	0
8	YGSYGSYGSYGEYGKK	Y7:+79.96633 - Y13:+79.96633	a1.a1	gi|116627844|ref|YP_820463.1|STER_1068|Tyrosine-protein kinase (capsular polysaccharide biosynthesis) [Streptococcus thermophilus LMD-9]_hit-name:epsD _hit-score:422_hit-evalue:1e-120_identity-percent:90.2439024390244	0	0	1	0	1	2	0	0	0	0	0	0	0	0	0	0	0	0	1	2	1	1	1	0	0	0	0	0	0	0	0	0	0	1	0	0	1	0	0	0	0	0	0	0	0
9	YGSYGSYGSYGEYGKK	S6:+79.96633 - Y10:+79.96633	a1.a1	gi|116627844|ref|YP_820463.1|STER_1068|Tyrosine-protein kinase (capsular polysaccharide biosynthesis) [Streptococcus thermophilus LMD-9]_hit-name:epsD _hit-score:422_hit-evalue:1e-120_identity-percent:90.2439024390244	0	0	1	0	0	0	0	0	0	0	0	0	0	0	0	0	0	0	0	0	0	0	0	0	0	0	0	0	0	0	0	0	0	0	0	0	0	1	0	0	0	0	0	0	0
10	YGSYGSYGSYGEYGKK	S6:+79.96633 - Y13:+79.96633	a1.a1	gi|116627844|ref|YP_820463.1|STER_1068|Tyrosine-protein kinase (capsular polysaccharide biosynthesis) [Streptococcus thermophilus LMD-9]_hit-name:epsD _hit-score:422_hit-evalue:1e-120_identity-percent:90.2439024390244	0	0	0	0	0	0	0	0	0	0	0	0	0	0	0	0	0	0	0	0	1	0	0	0	0	0	0	0	0	0	0	0	0	0	0	0	0	0	0	0	0	0	0	0	0
11	YGSYGSYGSYGEYGKK	S9:+79.96633 - Y7:+79.96633	a1.a1	gi|116627844|ref|YP_820463.1|STER_1068|Tyrosine-protein kinase (capsular polysaccharide biosynthesis) [Streptococcus thermophilus LMD-9]_hit-name:epsD _hit-score:422_hit-evalue:1e-120_identity-percent:90.2439024390244	0	0	0	0	0	0	0	0	0	0	0	0	0	0	0	0	0	0	0	0	0	0	0	0	0	0	0	0	0	0	0	0	1	0	0	1	0	0	0	0	0	0	0	0	0
12	YGSYGSYGSYGEYGKK	S9:+79.96633 - Y13:+79.96633	a1.a1	gi|116627844|ref|YP_820463.1|STER_1068|Tyrosine-protein kinase (capsular polysaccharide biosynthesis) [Streptococcus thermophilus LMD-9]_hit-name:epsD _hit-score:422_hit-evalue:1e-120_identity-percent:90.2439024390244	1	1	0	0	0	0	0	0	0	0	0	0	0	0	0	0	0	0	0	0	0	0	0	0	0	0	0	0	0	0	0	0	0	0	0	0	0	0	0	0	0	0	0	0	0
13	YGSYGSYGSYGEYGKK	Y4:+79.96633 - Y10:+79.96633	a1.a1	gi|116627844|ref|YP_820463.1|STER_1068|Tyrosine-protein kinase (capsular polysaccharide biosynthesis) [Streptococcus thermophilus LMD-9]_hit-name:epsD _hit-score:422_hit-evalue:1e-120_identity-percent:90.2439024390244	0	0	0	0	0	0	0	0	0	0	0	0	0	0	0	0	0	0	0	1	0	0	0	0	0	0	0	0	0	0	0	0	0	0	0	0	0	0	0	0	0	0	0	0	0
14	YGSYGSYGSYGEYGKK	Y10:+79.96633 - Y13:+79.96633	a1.a1	gi|116627844|ref|YP_820463.1|STER_1068|Tyrosine-protein kinase (capsular polysaccharide biosynthesis) [Streptococcus thermophilus LMD-9]_hit-name:epsD _hit-score:422_hit-evalue:1e-120_identity-percent:90.2439024390244	1	0	0	0	0	0	0	0	0	0	0	0	0	0	0	0	0	0	0	0	0	0	0	0	0	0	0	0	0	0	0	0	0	0	0	0	0	0	0	0	0	0	0	0	0
15	YGSYGSYGSYGEYGK	Y13:+79.96633	a1.a1	gi|116627844|ref|YP_820463.1|STER_1068|Tyrosine-protein kinase (capsular polysaccharide biosynthesis) [Streptococcus thermophilus LMD-9]_hit-name:epsD _hit-score:422_hit-evalue:1e-120_identity-percent:90.2439024390244	1	1	0	1	1	1	0	0	1	1	0	0	0	0	0	0	0	0	1	1	1	1	0	0	0	0	1	1	0	0	0	0	0	1	0	1	1	0	0	1	0	1	0	0	0
16	YGSYGSYGSYGEYGK	Y10:+79.96633	a1.a1	gi|116627844|ref|YP_820463.1|STER_1068|Tyrosine-protein kinase (capsular polysaccharide biosynthesis) [Streptococcus thermophilus LMD-9]_hit-name:epsD _hit-score:422_hit-evalue:1e-120_identity-percent:90.2439024390244	1	1	0	1	1	0	0	1	1	1	1	0	0	0	0	0	0	0	1	0	0	0	1	1	0	0	0	1	0	0	0	0	0	0	1	1	1	2	0	0	0	1	0	0	0
17	YGSYGSYGSYGEYGK	S9:+79.96633	a1.a1	gi|116627844|ref|YP_820463.1|STER_1068|Tyrosine-protein kinase (capsular polysaccharide biosynthesis) [Streptococcus thermophilus LMD-9]_hit-name:epsD _hit-score:422_hit-evalue:1e-120_identity-percent:90.2439024390244	0	0	0	0	0	0	0	0	0	0	0	2	0	0	0	0	0	0	0	0	0	0	0	0	0	0	0	0	1	0	0	0	0	0	0	0	0	0	0	0	1	0	0	0	0
18	YGSYGSYGSYGEYGK	Y1:+79.96633	a1.a1	gi|116627844|ref|YP_820463.1|STER_1068|Tyrosine-protein kinase (capsular polysaccharide biosynthesis) [Streptococcus thermophilus LMD-9]_hit-name:epsD _hit-score:422_hit-evalue:1e-120_identity-percent:90.2439024390244	0	0	0	1	0	0	0	0	0	0	0	0	0	0	0	0	0	0	1	0	0	0	0	0	0	0	0	0	0	0	0	0	0	0	0	1	0	0	0	0	0	0	0	0	0
19	YGSYGSYGSYGEYGK	Y7:+79.96633	a1.a1	gi|116627844|ref|YP_820463.1|STER_1068|Tyrosine-protein kinase (capsular polysaccharide biosynthesis) [Streptococcus thermophilus LMD-9]_hit-name:epsD _hit-score:422_hit-evalue:1e-120_identity-percent:90.2439024390244	0	0	1	0	0	0	0	0	0	0	0	0	0	0	0	0	0	0	0	0	0	1	0	0	0	0	0	0	0	0	0	0	0	0	0	0	0	0	0	0	0	0	0	0	0
20	YGSYGSYGSYGEYGK	S6:+79.96633	a1.a1	gi|116627844|ref|YP_820463.1|STER_1068|Tyrosine-protein kinase (capsular polysaccharide biosynthesis) [Streptococcus thermophilus LMD-9]_hit-name:epsD _hit-score:422_hit-evalue:1e-120_identity-percent:90.2439024390244	0	0	0	0	0	0	0	1	0	0	1	0	0	0	0	0	0	0	0	0	0	0	0	0	0	0	0	0	0	0	0	0	0	0	1	0	0	0	0	0	0	0	0	0	0
21	YGSYGSYGSYGEYGK	Y4:+79.96633	a1.a1	gi|116627844|ref|YP_820463.1|STER_1068|Tyrosine-protein kinase (capsular polysaccharide biosynthesis) [Streptococcus thermophilus LMD-9]_hit-name:epsD _hit-score:422_hit-evalue:1e-120_identity-percent:90.2439024390244	0	0	0	0	0	0	0	0	0	0	0	0	0	0	0	0	0	0	0	0	0	0	1	0	0	1	0	0	0	0	0	0	0	0	0	0	0	0	0	0	0	0	0	0	0
22	VDMTVDKYGSYGSYGSYGEYGKK	S13:+79.96633	a1.a1	gi|116627844|ref|YP_820463.1|STER_1068|Tyrosine-protein kinase (capsular polysaccharide biosynthesis) [Streptococcus thermophilus LMD-9]_hit-name:epsD _hit-score:422_hit-evalue:1e-120_identity-percent:90.2439024390244	0	1	0	0	0	0	0	0	0	0	0	0	0	0	0	0	0	0	0	0	0	0	0	0	0	0	0	0	0	0	0	0	0	0	0	0	0	0	0	0	0	0	0	0	0
23	VDMTVDKYGSYGSYGSYGEYGKK	S16:+79.96633	a1.a1	gi|116627844|ref|YP_820463.1|STER_1068|Tyrosine-protein kinase (capsular polysaccharide biosynthesis) [Streptococcus thermophilus LMD-9]_hit-name:epsD _hit-score:422_hit-evalue:1e-120_identity-percent:90.2439024390244	0	0	0	0	0	0	0	0	0	0	0	0	0	0	0	0	0	0	0	0	0	0	0	0	0	0	0	0	0	0	0	0	0	1	0	0	1	0	0	0	0	0	0	0	0
24	VDMTVDKYGSYGSYGSYGEYGKK	Y20:+79.96633	a1.a1	gi|116627844|ref|YP_820463.1|STER_1068|Tyrosine-protein kinase (capsular polysaccharide biosynthesis) [Streptococcus thermophilus LMD-9]_hit-name:epsD _hit-score:422_hit-evalue:1e-120_identity-percent:90.2439024390244	0	0	0	0	1	1	0	0	0	0	0	0	0	0	0	0	0	0	0	0	0	0	0	0	0	0	0	0	0	0	0	0	1	0	0	1	1	0	0	0	0	0	0	0	0
25	VDMTVDKYGSYGSYGSYGEYGKK	Y14:+79.96633	a1.a1	gi|116627844|ref|YP_820463.1|STER_1068|Tyrosine-protein kinase (capsular polysaccharide biosynthesis) [Streptococcus thermophilus LMD-9]_hit-name:epsD _hit-score:422_hit-evalue:1e-120_identity-percent:90.2439024390244	0	0	0	0	0	0	0	0	0	0	0	0	0	0	0	0	0	0	0	0	1	0	0	0	0	0	0	0	0	0	0	0	0	0	0	0	0	0	0	0	0	0	0	0	0
26	VDMTVDKYGSYGSYGSYGEYGKK	S10:+79.96633 - Y17:+79.96633	a1.a1	gi|116627844|ref|YP_820463.1|STER_1068|Tyrosine-protein kinase (capsular polysaccharide biosynthesis) [Streptococcus thermophilus LMD-9]_hit-name:epsD _hit-score:422_hit-evalue:1e-120_identity-percent:90.2439024390244	0	0	0	0	0	0	0	0	0	0	0	0	0	0	0	0	0	0	0	0	1	0	0	0	0	0	0	0	0	0	0	0	0	0	0	0	0	0	0	0	0	0	0	0	0
27	VDMTVDKYGSYGSYGSYGEYGKK	Y8:+79.96633 - Y17:+79.96633	a1.a1	gi|116627844|ref|YP_820463.1|STER_1068|Tyrosine-protein kinase (capsular polysaccharide biosynthesis) [Streptococcus thermophilus LMD-9]_hit-name:epsD _hit-score:422_hit-evalue:1e-120_identity-percent:90.2439024390244	0	0	0	0	0	0	0	0	0	0	0	0	0	0	0	0	0	0	0	0	0	0	0	1	0	0	0	0	0	0	0	0	0	0	0	0	0	0	0	0	0	0	0	0	0
28	VDMTVDKYGSYGSYGSYGEYGKK	S10:+79.96633 - Y20:+79.96633	a1.a1	gi|116627844|ref|YP_820463.1|STER_1068|Tyrosine-protein kinase (capsular polysaccharide biosynthesis) [Streptococcus thermophilus LMD-9]_hit-name:epsD _hit-score:422_hit-evalue:1e-120_identity-percent:90.2439024390244	0	0	0	0	0	0	0	0	0	0	0	0	0	0	0	0	0	0	0	0	0	0	0	0	0	0	0	0	0	0	0	0	0	0	0	0	0	1	0	0	0	0	0	0	0
29	VDMTVDKYGSYGSYGSYGEYGKK	S13:+79.96633 - Y20:+79.96633	a1.a1	gi|116627844|ref|YP_820463.1|STER_1068|Tyrosine-protein kinase (capsular polysaccharide biosynthesis) [Streptococcus thermophilus LMD-9]_hit-name:epsD _hit-score:422_hit-evalue:1e-120_identity-percent:90.2439024390244	0	0	1	0	0	0	0	0	0	0	0	0	0	0	0	0	0	0	0	0	0	0	0	0	0	0	0	0	0	0	0	0	0	0	1	0	0	0	0	0	0	0	0	0	0
30	VDMTVDKYGSYGSYGSYGEYGKK	S16:+79.96633 - Y11:+79.96633	a1.a1	gi|116627844|ref|YP_820463.1|STER_1068|Tyrosine-protein kinase (capsular polysaccharide biosynthesis) [Streptococcus thermophilus LMD-9]_hit-name:epsD _hit-score:422_hit-evalue:1e-120_identity-percent:90.2439024390244	0	0	0	0	0	0	0	0	0	0	0	0	0	0	0	0	0	0	0	0	0	0	0	0	0	0	0	0	0	0	0	0	0	0	0	0	0	0	0	0	0	0	0	0	0
31	VDMTVDKYGSYGSYGSYGEYGKK	Y11:+79.96633 - Y20:+79.96633	a1.a1	gi|116627844|ref|YP_820463.1|STER_1068|Tyrosine-protein kinase (capsular polysaccharide biosynthesis) [Streptococcus thermophilus LMD-9]_hit-name:epsD _hit-score:422_hit-evalue:1e-120_identity-percent:90.2439024390244	0	0	0	0	0	0	0	0	0	0	0	0	0	0	0	0	0	0	0	0	0	0	0	2	0	0	0	0	0	0	0	0	0	0	0	0	0	0	0	0	0	0	0	0	0
32	VDMTVDKYGSYGSYGSYGEYGKK	Y14:+79.96633 - Y20:+79.96633	a1.a1	gi|116627844|ref|YP_820463.1|STER_1068|Tyrosine-protein kinase (capsular polysaccharide biosynthesis) [Streptococcus thermophilus LMD-9]_hit-name:epsD _hit-score:422_hit-evalue:1e-120_identity-percent:90.2439024390244	0	0	0	0	0	0	0	0	0	0	0	0	0	0	0	0	0	0	0	0	0	0	0	0	0	0	0	0	0	0	0	0	0	0	0	0	0	0	0	0	0	0	0	0	0
33	VDMTVDKYGSYGSYGSYGEYGKK	Y8:+79.96633 - Y20:+79.96633	a1.a1	gi|116627844|ref|YP_820463.1|STER_1068|Tyrosine-protein kinase (capsular polysaccharide biosynthesis) [Streptococcus thermophilus LMD-9]_hit-name:epsD _hit-score:422_hit-evalue:1e-120_identity-percent:90.2439024390244	0	0	0	1	1	0	0	0	0	0	0	0	0	0	0	0	0	0	0	0	0	0	0	0	0	0	0	0	0	0	0	0	0	0	0	0	0	0	0	0	0	0	0	0	0
34	VDMTVDKYGSYGSYGSYGEYGKK	Y11:+79.96633 - Y17:+79.96633	a1.a1	gi|116627844|ref|YP_820463.1|STER_1068|Tyrosine-protein kinase (capsular polysaccharide biosynthesis) [Streptococcus thermophilus LMD-9]_hit-name:epsD _hit-score:422_hit-evalue:1e-120_identity-percent:90.2439024390244	0	0	0	0	0	1	0	0	0	0	0	0	0	0	0	0	0	0	0	0	0	0	0	0	0	0	0	0	0	0	0	0	0	0	1	0	0	0	0	0	0	0	0	0	0
35	YGSYGSYGSYGEYGK	Y4:+79.96633 - Y13:+79.96633	a1.a1	gi|116627844|ref|YP_820463.1|STER_1068|Tyrosine-protein kinase (capsular polysaccharide biosynthesis) [Streptococcus thermophilus LMD-9]_hit-name:epsD _hit-score:422_hit-evalue:1e-120_identity-percent:90.2439024390244	0	0	0	1	0	0	0	0	0	0	0	0	0	0	0	0	0	0	0	0	0	1	1	0	0	0	0	0	0	0	0	0	0	0	0	0	0	0	0	0	0	0	0	0	0
36	YGSYGSYGSYGEYGK	S6:+79.96633 - Y10:+79.96633	a1.a1	gi|116627844|ref|YP_820463.1|STER_1068|Tyrosine-protein kinase (capsular polysaccharide biosynthesis) [Streptococcus thermophilus LMD-9]_hit-name:epsD _hit-score:422_hit-evalue:1e-120_identity-percent:90.2439024390244	1	0	0	1	0	0	0	0	0	0	0	0	0	0	0	0	0	0	1	0	0	0	0	0	0	0	0	0	0	0	0	0	0	0	0	0	0	0	0	0	0	0	0	0	0
37	YGSYGSYGSYGEYGK	Y7:+79.96633 - Y10:+79.96633	a1.a1	gi|116627844|ref|YP_820463.1|STER_1068|Tyrosine-protein kinase (capsular polysaccharide biosynthesis) [Streptococcus thermophilus LMD-9]_hit-name:epsD _hit-score:422_hit-evalue:1e-120_identity-percent:90.2439024390244	0	0	0	0	0	0	0	0	0	0	0	0	0	0	0	0	0	0	0	0	0	1	1	1	0	0	0	0	0	0	0	0	0	0	0	1	0	1	0	0	0	0	0	0	0
38	YGSYGSYGSYGEYGK	Y1:+79.96633 - Y13:+79.96633	a1.a1	gi|116627844|ref|YP_820463.1|STER_1068|Tyrosine-protein kinase (capsular polysaccharide biosynthesis) [Streptococcus thermophilus LMD-9]_hit-name:epsD _hit-score:422_hit-evalue:1e-120_identity-percent:90.2439024390244	0	0	0	0	0	0	0	0	0	0	0	0	0	0	0	0	0	0	0	0	0	0	0	0	0	0	0	0	0	0	0	0	0	0	0	0	0	1	0	0	0	0	0	0	0
39	YGSYGSYGSYGEYGK	S6:+79.96633 - Y13:+79.96633	a1.a1	gi|116627844|ref|YP_820463.1|STER_1068|Tyrosine-protein kinase (capsular polysaccharide biosynthesis) [Streptococcus thermophilus LMD-9]_hit-name:epsD _hit-score:422_hit-evalue:1e-120_identity-percent:90.2439024390244	0	0	1	0	0	0	0	0	0	0	0	0	0	0	0	0	0	0	0	0	0	0	0	0	0	0	0	0	0	0	0	0	0	1	0	0	0	0	0	0	0	0	0	0	0
40	YGSYGSYGSYGEYGK	Y7:+79.96633 - Y13:+79.96633	a1.a1	gi|116627844|ref|YP_820463.1|STER_1068|Tyrosine-protein kinase (capsular polysaccharide biosynthesis) [Streptococcus thermophilus LMD-9]_hit-name:epsD _hit-score:422_hit-evalue:1e-120_identity-percent:90.2439024390244	0	0	0	0	0	1	0	0	0	0	0	0	0	0	0	0	0	0	0	0	0	0	0	0	0	0	0	0	0	0	0	0	0	0	0	0	1	0	0	0	0	0	0	0	0
41	VDMTVDKYGSYGSYGSYGEYGKK	Y8:+79.96633 - Y11:+79.96633 - Y20:+79.96633	a1.a1	gi|116627844|ref|YP_820463.1|STER_1068|Tyrosine-protein kinase (capsular polysaccharide biosynthesis) [Streptococcus thermophilus LMD-9]_hit-name:epsD _hit-score:422_hit-evalue:1e-120_identity-percent:90.2439024390244	0	0	0	0	0	0	0	0	0	0	0	0	0	0	0	0	0	0	0	0	1	0	0	0	0	0	0	0	0	0	0	0	0	1	0	0	0	0	0	0	0	0	0	0	0
42	VDMTVDKYGSYGSYGSYGEYGKK	S13:+79.96633 - Y17:+79.96633 - Y20:+79.96633	a1.a1	gi|116627844|ref|YP_820463.1|STER_1068|Tyrosine-protein kinase (capsular polysaccharide biosynthesis) [Streptococcus thermophilus LMD-9]_hit-name:epsD _hit-score:422_hit-evalue:1e-120_identity-percent:90.2439024390244	0	0	0	0	1	0	0	0	0	0	0	0	0	0	0	0	0	0	0	0	0	0	0	0	0	0	0	0	0	0	0	0	0	0	0	0	0	0	0	0	0	0	0	0	0
43	VDMTVDKYGSYGSYGSYGEYGKK	S10:+79.96633 - Y11:+79.96633 - Y20:+79.96633	a1.a1	gi|116627844|ref|YP_820463.1|STER_1068|Tyrosine-protein kinase (capsular polysaccharide biosynthesis) [Streptococcus thermophilus LMD-9]_hit-name:epsD _hit-score:422_hit-evalue:1e-120_identity-percent:90.2439024390244	0	0	0	0	0	0	0	0	0	0	0	0	0	0	0	0	0	0	0	0	0	0	0	0	0	0	0	0	0	0	0	0	0	0	0	0	1	0	0	0	0	0	0	0	0
44	VDMTVDKYGSYGSYGSYGEYGKK	T4:+79.96633 - Y14:+79.96633 - Y20:+79.96633	a1.a1	gi|116627844|ref|YP_820463.1|STER_1068|Tyrosine-protein kinase (capsular polysaccharide biosynthesis) [Streptococcus thermophilus LMD-9]_hit-name:epsD _hit-score:422_hit-evalue:1e-120_identity-percent:90.2439024390244	0	1	0	0	0	0	0	0	0	0	0	0	0	0	0	0	0	0	0	0	0	0	0	0	0	0	0	0	0	0	0	0	0	0	0	0	0	0	0	0	0	0	0	0	0
45	VDMTVDKYGSYGSYGSYGEYGKK	S16:+79.96633 - Y14:+79.96633 - Y20:+79.96633	a1.a1	gi|116627844|ref|YP_820463.1|STER_1068|Tyrosine-protein kinase (capsular polysaccharide biosynthesis) [Streptococcus thermophilus LMD-9]_hit-name:epsD _hit-score:422_hit-evalue:1e-120_identity-percent:90.2439024390244	0	0	0	0	0	0	0	0	0	0	0	0	0	0	0	0	0	0	0	0	0	0	0	0	0	0	0	0	0	0	0	0	0	0	0	0	0	0	0	0	0	0	0	0	0
46	VDMTVDKYGSYGSYGSYGEYGKK	S10:+79.96633 - Y8:+79.96633 - Y20:+79.96633	a1.a1	gi|116627844|ref|YP_820463.1|STER_1068|Tyrosine-protein kinase (capsular polysaccharide biosynthesis) [Streptococcus thermophilus LMD-9]_hit-name:epsD _hit-score:422_hit-evalue:1e-120_identity-percent:90.2439024390244	0	0	0	0	0	0	0	0	0	0	0	0	0	0	0	0	0	0	0	0	0	0	0	0	0	0	0	0	0	0	0	0	0	0	0	0	0	0	0	0	0	0	0	0	0
47	VDMTVDKYGSYGSYGSYGEYGKK	Y8:+79.96633 - Y14:+79.96633 - Y20:+79.96633	a1.a1	gi|116627844|ref|YP_820463.1|STER_1068|Tyrosine-protein kinase (capsular polysaccharide biosynthesis) [Streptococcus thermophilus LMD-9]_hit-name:epsD _hit-score:422_hit-evalue:1e-120_identity-percent:90.2439024390244	0	0	1	0	0	0	0	0	0	0	0	0	0	0	0	0	0	0	0	0	0	0	0	0	0	0	0	0	0	0	0	0	0	0	0	0	0	0	0	0	0	0	0	0	0
48	VDMTVDKYGSYGSYGSYGEYGKK	S13:+79.96633 - Y11:+79.96633 - Y20:+79.96633	a1.a1	gi|116627844|ref|YP_820463.1|STER_1068|Tyrosine-protein kinase (capsular polysaccharide biosynthesis) [Streptococcus thermophilus LMD-9]_hit-name:epsD _hit-score:422_hit-evalue:1e-120_identity-percent:90.2439024390244	0	0	0	0	0	0	0	0	0	0	0	0	0	0	0	0	0	0	0	0	0	0	0	0	0	0	0	0	0	0	0	0	0	0	0	0	0	1	0	0	0	0	0	0	0
49	VDMTVDKYGSYGSYGSYGEYGKK	S10:+79.96633 - Y11:+79.96633 - Y17:+79.96633	a1.a1	gi|116627844|ref|YP_820463.1|STER_1068|Tyrosine-protein kinase (capsular polysaccharide biosynthesis) [Streptococcus thermophilus LMD-9]_hit-name:epsD _hit-score:422_hit-evalue:1e-120_identity-percent:90.2439024390244	0	0	0	0	0	1	0	0	0	0	0	0	0	0	0	0	0	0	0	0	0	0	0	0	0	0	0	0	0	0	0	0	0	0	0	0	0	0	0	0	0	0	0	0	0
50	VDMTVDKYGSYGSYGSYGEYGK	Y14:+79.96633	a1.a1	gi|116627844|ref|YP_820463.1|STER_1068|Tyrosine-protein kinase (capsular polysaccharide biosynthesis) [Streptococcus thermophilus LMD-9]_hit-name:epsD _hit-score:422_hit-evalue:1e-120_identity-percent:90.2439024390244	0	1	1	0	0	0	0	0	0	0	0	0	0	0	0	0	0	0	1	0	0	0	1	1	0	0	0	0	0	0	0	0	0	0	0	0	0	0	0	0	0	0	0	0	0
51	VDMTVDKYGSYGSYGSYGEYGK	S16:+79.96633	a1.a1	gi|116627844|ref|YP_820463.1|STER_1068|Tyrosine-protein kinase (capsular polysaccharide biosynthesis) [Streptococcus thermophilus LMD-9]_hit-name:epsD _hit-score:422_hit-evalue:1e-120_identity-percent:90.2439024390244	0	0	0	0	0	1	0	0	0	0	0	0	0	0	0	0	0	0	0	0	1	0	0	0	0	0	0	0	0	0	0	0	0	1	1	1	1	0	0	0	0	0	0	0	0
52	VDMTVDKYGSYGSYGSYGEYGK	S13:+79.96633	a1.a1	gi|116627844|ref|YP_820463.1|STER_1068|Tyrosine-protein kinase (capsular polysaccharide biosynthesis) [Streptococcus thermophilus LMD-9]_hit-name:epsD _hit-score:422_hit-evalue:1e-120_identity-percent:90.2439024390244	0	0	1	0	0	0	0	0	0	0	0	0	0	0	0	0	0	0	0	0	0	0	0	0	0	0	0	0	0	0	0	0	0	0	0	0	0	0	0	0	0	0	0	0	0
53	VDMTVDKYGSYGSYGSYGEYGK	S10:+79.96633	a1.a1	gi|116627844|ref|YP_820463.1|STER_1068|Tyrosine-protein kinase (capsular polysaccharide biosynthesis) [Streptococcus thermophilus LMD-9]_hit-name:epsD _hit-score:422_hit-evalue:1e-120_identity-percent:90.2439024390244	0	0	0	0	0	0	0	0	0	0	0	0	0	0	0	0	0	0	0	0	0	0	0	0	0	0	0	0	0	0	0	0	0	0	0	0	0	0	0	0	0	0	0	0	0
54	VDMTVDKYGSYGSYGSYGEYGK	Y20:+79.96633	a1.a1	gi|116627844|ref|YP_820463.1|STER_1068|Tyrosine-protein kinase (capsular polysaccharide biosynthesis) [Streptococcus thermophilus LMD-9]_hit-name:epsD _hit-score:422_hit-evalue:1e-120_identity-percent:90.2439024390244	0	0	0	0	0	0	0	0	0	0	0	0	0	0	0	0	0	0	0	0	0	0	0	0	0	0	0	0	0	0	0	0	0	1	0	0	0	0	0	0	0	0	0	0	0
55	VDMTVDKYGSYGSYGSYGEYGK	Y17:+79.96633	a1.a1	gi|116627844|ref|YP_820463.1|STER_1068|Tyrosine-protein kinase (capsular polysaccharide biosynthesis) [Streptococcus thermophilus LMD-9]_hit-name:epsD _hit-score:422_hit-evalue:1e-120_identity-percent:90.2439024390244	0	0	0	0	0	0	0	0	0	0	0	0	0	0	0	0	0	0	0	0	0	0	0	0	0	0	0	0	0	0	0	0	0	0	0	0	0	0	0	0	0	0	0	0	0
56	VDMTVDKYGSYGSYGSYGEYGK	Y11:+79.96633	a1.a1	gi|116627844|ref|YP_820463.1|STER_1068|Tyrosine-protein kinase (capsular polysaccharide biosynthesis) [Streptococcus thermophilus LMD-9]_hit-name:epsD _hit-score:422_hit-evalue:1e-120_identity-percent:90.2439024390244	1	0	0	0	0	0	0	0	0	0	0	0	0	0	0	0	0	0	0	0	0	0	0	0	0	0	0	0	0	0	0	0	0	0	0	0	0	0	0	0	0	0	0	0	0
57	VDMTVDKYGSYGSYGSYGEYGK	Y8:+79.96633 - Y14:+79.96633	a1.a1	gi|116627844|ref|YP_820463.1|STER_1068|Tyrosine-protein kinase (capsular polysaccharide biosynthesis) [Streptococcus thermophilus LMD-9]_hit-name:epsD _hit-score:422_hit-evalue:1e-120_identity-percent:90.2439024390244	0	0	0	0	0	0	0	0	0	0	0	0	0	0	0	0	0	0	0	0	1	0	0	0	0	0	0	0	0	0	0	0	0	0	0	0	0	0	0	0	0	0	0	0	0
58	VDMTVDKYGSYGSYGSYGEYGK	S10:+79.96633 - Y17:+79.96633	a1.a1	gi|116627844|ref|YP_820463.1|STER_1068|Tyrosine-protein kinase (capsular polysaccharide biosynthesis) [Streptococcus thermophilus LMD-9]_hit-name:epsD _hit-score:422_hit-evalue:1e-120_identity-percent:90.2439024390244	0	0	1	0	0	0	0	0	0	0	0	0	0	0	0	0	0	0	0	0	0	0	0	1	0	0	0	0	0	0	0	0	0	0	0	0	0	0	0	0	0	0	0	0	0
59	VDMTVDKYGSYGSYGSYGEYGK	Y8:+79.96633 - Y20:+79.96633	a1.a1	gi|116627844|ref|YP_820463.1|STER_1068|Tyrosine-protein kinase (capsular polysaccharide biosynthesis) [Streptococcus thermophilus LMD-9]_hit-name:epsD _hit-score:422_hit-evalue:1e-120_identity-percent:90.2439024390244	0	0	0	0	0	0	0	0	0	0	0	0	0	0	0	0	0	0	0	0	0	0	0	0	0	0	0	0	0	0	0	0	0	0	0	0	0	0	0	0	0	0	0	0	0
60	VDMTVDKYGSYGSYGSYGEYGK	Y11:+79.96633 - Y17:+79.96633	a1.a1	gi|116627844|ref|YP_820463.1|STER_1068|Tyrosine-protein kinase (capsular polysaccharide biosynthesis) [Streptococcus thermophilus LMD-9]_hit-name:epsD _hit-score:422_hit-evalue:1e-120_identity-percent:90.2439024390244	0	0	0	0	0	0	0	0	0	0	0	0	0	0	0	0	0	0	0	0	0	0	0	0	0	0	0	0	0	0	0	0	0	0	1	0	0	0	0	0	0	0	0	0	0
61	VDMTVDKYGSYGSYGSYGEYGK	Y14:+79.96633 - Y20:+79.96633	a1.a1	gi|116627844|ref|YP_820463.1|STER_1068|Tyrosine-protein kinase (capsular polysaccharide biosynthesis) [Streptococcus thermophilus LMD-9]_hit-name:epsD _hit-score:422_hit-evalue:1e-120_identity-percent:90.2439024390244	0	0	0	0	0	0	0	0	0	0	0	0	0	0	0	0	0	0	0	0	0	0	0	0	0	0	0	0	0	0	0	0	0	0	1	0	0	0	0	0	0	0	0	0	0
62	VDMTVDKYGSYGSYGSYGEYGK	Y8:+79.96633 - Y17:+79.96633	a1.a1	gi|116627844|ref|YP_820463.1|STER_1068|Tyrosine-protein kinase (capsular polysaccharide biosynthesis) [Streptococcus thermophilus LMD-9]_hit-name:epsD _hit-score:422_hit-evalue:1e-120_identity-percent:90.2439024390244	0	0	0	0	0	1	0	0	0	0	0	0	0	0	0	0	0	0	0	0	0	0	0	0	0	0	0	0	0	0	0	0	0	0	0	0	0	0	0	0	0	0	0	0	0
63	VDMTVDKYGSYGSYGSYGEYGK	S13:+79.96633 - Y8:+79.96633	a1.a1	gi|116627844|ref|YP_820463.1|STER_1068|Tyrosine-protein kinase (capsular polysaccharide biosynthesis) [Streptococcus thermophilus LMD-9]_hit-name:epsD _hit-score:422_hit-evalue:1e-120_identity-percent:90.2439024390244	0	0	0	0	0	0	0	0	0	0	0	0	0	0	0	0	0	0	0	0	0	0	0	0	0	0	0	0	0	0	0	0	0	0	0	0	1	0	0	0	0	0	0	0	0
64	VDMTVDKYGSYGSYGSYGEYGK	S10:+79.96633 - S16:+79.96633	a1.a1	gi|116627844|ref|YP_820463.1|STER_1068|Tyrosine-protein kinase (capsular polysaccharide biosynthesis) [Streptococcus thermophilus LMD-9]_hit-name:epsD _hit-score:422_hit-evalue:1e-120_identity-percent:90.2439024390244	0	1	0	0	0	0	0	0	0	0	0	0	0	0	0	0	0	0	0	0	0	0	0	0	0	0	0	0	0	0	0	0	0	0	0	0	0	0	0	0	0	0	0	0	0
65	VDMTVDKYGSYGSYGSYGEYGK	S13:+79.96633 - Y17:+79.96633	a1.a1	gi|116627844|ref|YP_820463.1|STER_1068|Tyrosine-protein kinase (capsular polysaccharide biosynthesis) [Streptococcus thermophilus LMD-9]_hit-name:epsD _hit-score:422_hit-evalue:1e-120_identity-percent:90.2439024390244	0	1	0	0	0	0	0	0	0	0	0	0	0	0	0	0	0	0	0	0	0	0	0	0	0	0	0	0	0	0	0	0	0	0	0	0	0	0	0	0	0	0	0	0	0
66	VDMTVDKYGSYGSYGSYGEYGK	M3:+15.99491 - Y11:+79.96633	a1.a1	gi|116627844|ref|YP_820463.1|STER_1068|Tyrosine-protein kinase (capsular polysaccharide biosynthesis) [Streptococcus thermophilus LMD-9]_hit-name:epsD _hit-score:422_hit-evalue:1e-120_identity-percent:90.2439024390244	0	0	0	0	0	1	0	0	0	0	0	0	0	0	0	0	0	0	0	0	0	0	0	0	0	0	0	0	0	0	0	0	0	0	0	0	0	0	0	0	0	0	0	0	0
67	VDMTVDKYGSYGSYGSYGEYGKK	Y17:+79.96633	a1.a1	gi|116627844|ref|YP_820463.1|STER_1068|Tyrosine-protein kinase (capsular polysaccharide biosynthesis) [Streptococcus thermophilus LMD-9]_hit-name:epsD _hit-score:422_hit-evalue:1e-120_identity-percent:90.2439024390244	0	0	0	0	0	0	0	0	0	0	0	0	0	0	0	0	0	0	1	0	0	0	0	0	0	0	0	0	0	0	0	0	1	0	0	1	0	0	0	0	0	0	0	0	0
68	VDMTVDKYGSYGSYGSYGEYGKK	S10:+79.96633	a1.a1	gi|116627844|ref|YP_820463.1|STER_1068|Tyrosine-protein kinase (capsular polysaccharide biosynthesis) [Streptococcus thermophilus LMD-9]_hit-name:epsD _hit-score:422_hit-evalue:1e-120_identity-percent:90.2439024390244	0	0	0	1	0	0	0	0	0	0	0	0	0	0	0	0	0	0	0	0	0	0	0	0	0	0	0	0	0	0	0	0	0	0	0	0	0	0	0	0	0	0	0	0	0
69	VDMTVDKYGSYGSYGSYGEYGKK	Y8:+79.96633	a1.a1	gi|116627844|ref|YP_820463.1|STER_1068|Tyrosine-protein kinase (capsular polysaccharide biosynthesis) [Streptococcus thermophilus LMD-9]_hit-name:epsD _hit-score:422_hit-evalue:1e-120_identity-percent:90.2439024390244	0	0	0	0	0	0	0	0	0	0	0	0	0	0	0	0	0	0	0	0	0	1	0	0	0	0	0	0	0	0	0	0	0	0	0	0	0	0	0	0	0	0	0	0	0
70	VDMTVDKYGSYGSYGSYGEYGKK	S16:+79.96633 - Y20:+79.96633	a1.a1	gi|116627844|ref|YP_820463.1|STER_1068|Tyrosine-protein kinase (capsular polysaccharide biosynthesis) [Streptococcus thermophilus LMD-9]_hit-name:epsD _hit-score:422_hit-evalue:1e-120_identity-percent:90.2439024390244	0	0	0	0	0	0	0	0	0	0	0	0	0	0	0	0	0	0	0	0	0	0	0	0	0	0	0	0	0	0	0	0	0	1	0	0	1	0	0	0	0	0	0	0	0
71	VDMTVDKYGSYGSYGSYGEYGKK	M3:+15.99491 - Y20:+79.96633	a1.a1	gi|116627844|ref|YP_820463.1|STER_1068|Tyrosine-protein kinase (capsular polysaccharide biosynthesis) [Streptococcus thermophilus LMD-9]_hit-name:epsD _hit-score:422_hit-evalue:1e-120_identity-percent:90.2439024390244	0	0	0	0	0	0	0	0	0	0	0	0	0	0	0	0	0	0	0	0	0	0	0	1	0	0	0	0	0	0	0	0	0	0	0	0	0	0	0	0	0	0	0	0	0
72	VDMTVDKYGSYGSYGSYGEYGK	S16:+79.96633 - Y8:+79.96633	a1.a1	gi|116627844|ref|YP_820463.1|STER_1068|Tyrosine-protein kinase (capsular polysaccharide biosynthesis) [Streptococcus thermophilus LMD-9]_hit-name:epsD _hit-score:422_hit-evalue:1e-120_identity-percent:90.2439024390244	0	0	0	0	0	0	0	0	0	0	0	0	0	0	0	0	0	0	0	0	0	0	0	0	0	0	0	0	0	0	0	0	1	0	0	0	0	0	0	0	0	0	0	0	0
73	VDMTVDKYGSYGSYGSYGEYGK	T4:+79.96633 - Y14:+79.96633	a1.a1	gi|116627844|ref|YP_820463.1|STER_1068|Tyrosine-protein kinase (capsular polysaccharide biosynthesis) [Streptococcus thermophilus LMD-9]_hit-name:epsD _hit-score:422_hit-evalue:1e-120_identity-percent:90.2439024390244	0	0	0	0	0	0	0	0	0	0	0	0	0	0	0	0	0	0	0	0	0	1	0	0	0	0	0	0	0	0	0	0	0	0	0	0	0	0	0	0	0	0	0	0	0
74	VDMTVDKYGSYGSYGSYGEYGK	S10:+79.96633 - Y14:+79.96633	a1.a1	gi|116627844|ref|YP_820463.1|STER_1068|Tyrosine-protein kinase (capsular polysaccharide biosynthesis) [Streptococcus thermophilus LMD-9]_hit-name:epsD _hit-score:422_hit-evalue:1e-120_identity-percent:90.2439024390244	0	0	0	0	0	0	0	0	0	0	0	0	0	0	0	0	0	0	0	0	0	0	0	0	0	0	0	0	0	0	0	0	0	0	0	1	0	0	0	0	0	0	0	0	0
75	YGSYGSYGSYGEYGKKSDQK	S9:+79.96633 - Y13:+79.96633	a1.a1	gi|116627844|ref|YP_820463.1|STER_1068|Tyrosine-protein kinase (capsular polysaccharide biosynthesis) [Streptococcus thermophilus LMD-9]_hit-name:epsD _hit-score:422_hit-evalue:1e-120_identity-percent:90.2439024390244	0	0	0	0	0	0	0	0	0	0	0	0	0	0	0	0	0	0	0	0	0	0	0	0	0	0	0	0	0	0	0	0	0	0	0	1	0	0	0	0	0	0	0	0	0
76	VDMTVDKYGSYGSYGSYGEYGK	M3:+15.99491 - Y8:+79.96633 - Y20:+79.96633	a1.a1	gi|116627844|ref|YP_820463.1|STER_1068|Tyrosine-protein kinase (capsular polysaccharide biosynthesis) [Streptococcus thermophilus LMD-9]_hit-name:epsD _hit-score:422_hit-evalue:1e-120_identity-percent:90.2439024390244	0	0	0	0	0	0	0	0	0	0	0	0	0	0	0	0	0	0	0	0	0	0	0	0	0	0	0	0	0	0	0	0	0	0	0	0	1	0	0	0	0	0	0	0	0
77	NLNETQTFK	T5:+79.96633	a2.a1	gi|116627610|ref|YP_820229.1|STER_0782|Cell division initiation protein [Streptococcus thermophilus LMD-9]_hit-name:divIVA _hit-score:550_hit-evalue:1e-158_identity-percent:98.2817869415807	2	0	0	1	0	2	0	0	0	0	0	0	0	0	1	0	0	0	0	3	1	0	2	1	0	1	0	0	1	1	0	0	3	0	3	1	0	1	0	0	0	1	0	0	1
78	NLNETQTFKLNISE	T5:+79.96633	a2.a1	gi|116627610|ref|YP_820229.1|STER_0782|Cell division initiation protein [Streptococcus thermophilus LMD-9]_hit-name:divIVA _hit-score:550_hit-evalue:1e-158_identity-percent:98.2817869415807	2	0	1	1	0	2	0	0	0	0	0	1	0	0	0	0	0	0	0	2	1	0	2	2	0	0	0	0	1	0	0	0	2	0	3	4	0	4	0	0	0	0	0	0	0
81	VLDEHVPDSNDAASFDATR	S9:+79.96633	a2.a2	gi|116627610|ref|YP_820229.1|STER_0782|Cell division initiation protein [Streptococcus thermophilus LMD-9]_hit-name:divIVA _hit-score:550_hit-evalue:1e-158_identity-percent:98.2817869415807	0	0	0	1	0	0	0	0	0	0	0	0	0	0	0	0	0	0	0	0	0	0	0	0	0	0	0	0	0	0	0	0	0	0	2	0	0	0	0	0	0	0	0	0	0
82	VLDEHVPDSNDAASFDATRQFTPDEMAELQR	S14:+79.96633	a2.a2	gi|116627610|ref|YP_820229.1|STER_0782|Cell division initiation protein [Streptococcus thermophilus LMD-9]_hit-name:divIVA _hit-score:550_hit-evalue:1e-158_identity-percent:98.2817869415807	0	0	0	0	0	1	0	0	0	0	0	0	0	0	0	0	0	0	0	0	0	0	0	0	0	0	0	0	0	0	0	0	0	0	0	0	0	0	0	0	0	0	0	0	0
79	VLDEHVPDSNDAASFDATR	T18:+79.96633	a2.a2	gi|116627610|ref|YP_820229.1|STER_0782|Cell division initiation protein [Streptococcus thermophilus LMD-9]_hit-name:divIVA _hit-score:550_hit-evalue:1e-158_identity-percent:98.2817869415807	0	0	1	2	0	0	1	0	0	1	0	1	0	0	0	0	0	0	0	2	0	0	2	0	0	0	0	0	0	0	0	0	2	0	0	2	0	1	1	0	0	1	0	0	0
80	VLDEHVPDSNDAASFDATR	S14:+79.96633	a2.a2	gi|116627610|ref|YP_820229.1|STER_0782|Cell division initiation protein [Streptococcus thermophilus LMD-9]_hit-name:divIVA _hit-score:550_hit-evalue:1e-158_identity-percent:98.2817869415807	2	0	1	1	0	2	1	0	0	1	0	0	0	0	0	0	0	0	0	2	1	0	1	0	0	0	0	0	0	0	0	0	1	0	1	1	0	2	0	0	0	0	0	0	0
85	VLDEHVPDSNDAASFDATRQFTPDEMAELQR	T22:+79.96633	a2.a2	gi|116627610|ref|YP_820229.1|STER_0782|Cell division initiation protein [Streptococcus thermophilus LMD-9]_hit-name:divIVA _hit-score:550_hit-evalue:1e-158_identity-percent:98.2817869415807	0	0	0	0	0	0	1	0	0	0	0	0	0	0	0	0	0	0	0	0	0	0	0	0	0	0	0	0	0	0	0	0	0	0	0	0	0	0	0	0	0	0	0	0	0
86	VLDEHVPDSNDAASFDATRQFTPDEMAELQR	M26:+15.99491 - S9:+79.96633	a2.a2	gi|116627610|ref|YP_820229.1|STER_0782|Cell division initiation protein [Streptococcus thermophilus LMD-9]_hit-name:divIVA _hit-score:550_hit-evalue:1e-158_identity-percent:98.2817869415807	0	0	0	0	0	0	0	0	0	0	0	0	0	0	0	0	0	0	0	0	0	0	0	0	0	0	0	0	0	0	0	0	0	0	0	0	0	0	0	0	0	0	0	0	0
83	VLDEHVPDSNDAASFDATRQFTPDEMAELQR	T18:+79.96633	a2.a2	gi|116627610|ref|YP_820229.1|STER_0782|Cell division initiation protein [Streptococcus thermophilus LMD-9]_hit-name:divIVA _hit-score:550_hit-evalue:1e-158_identity-percent:98.2817869415807	0	0	1	0	0	0	0	0	0	0	0	0	0	0	0	0	0	0	0	0	1	0	0	0	0	0	0	0	0	0	0	0	0	0	0	1	0	0	0	0	0	0	0	0	0
84	VLDEHVPDSNDAASFDATRQFTPDEMAELQR	M26:+15.99491 - T18:+79.96633	a2.a2	gi|116627610|ref|YP_820229.1|STER_0782|Cell division initiation protein [Streptococcus thermophilus LMD-9]_hit-name:divIVA _hit-score:550_hit-evalue:1e-158_identity-percent:98.2817869415807	0	0	0	1	0	0	0	0	0	0	0	0	0	0	0	0	0	0	0	0	0	0	0	0	0	0	0	0	0	0	0	0	0	0	0	0	0	0	0	0	0	0	0	0	0
87	QFTPDEMAELQR	T3:+79.96633	a2.a2	gi|116627610|ref|YP_820229.1|STER_0782|Cell division initiation protein [Streptococcus thermophilus LMD-9]_hit-name:divIVA _hit-score:550_hit-evalue:1e-158_identity-percent:98.2817869415807	0	0	0	0	0	0	0	0	0	0	0	0	0	0	0	0	0	0	0	0	0	0	0	0	0	0	0	0	0	0	0	0	0	0	0	0	0	0	0	0	0	0	0	0	0
88	VLDEHVPDSNDAASFDATRQFTPDEMAELQR	S9:+79.96633	a2.a2	gi|116627610|ref|YP_820229.1|STER_0782|Cell division initiation protein [Streptococcus thermophilus LMD-9]_hit-name:divIVA _hit-score:550_hit-evalue:1e-158_identity-percent:98.2817869415807	0	0	0	0	0	0	0	0	0	0	0	0	0	0	0	0	0	0	0	0	0	0	0	0	0	0	0	0	0	0	0	0	0	0	0	0	0	0	0	0	0	0	0	0	0
90	EDKTQNSYEESQELDFQDAK	S11:+79.96633	a3.a1	gi|116627170|ref|YP_819789.1|STER_0283|hypothetical protein STER_0283 [Streptococcus thermophilus LMD-9]_hit-name:pcsB _hit-score:34_hit-evalue:0.006_identity-percent:21.6981132075472	1	0	0	1	0	0	0	0	0	0	0	0	0	0	0	0	0	0	0	0	1	0	1	0	0	0	0	0	0	0	0	0	0	0	0	1	0	1	0	0	0	0	0	0	0
92	YEESQELDFQDAK	S4:+79.96633	a3.a1	gi|116627170|ref|YP_819789.1|STER_0283|hypothetical protein STER_0283 [Streptococcus thermophilus LMD-9]_hit-name:pcsB _hit-score:34_hit-evalue:0.006_identity-percent:21.6981132075472	0	0	1	0	0	1	0	0	0	0	0	0	0	0	0	0	0	0	0	1	1	0	1	1	0	0	0	0	0	0	0	0	0	0	1	0	0	1	0	0	0	0	0	0	0
94	DKTQNSYEESQELDFQDAK	S10:+79.96633	a3.a1	gi|116627170|ref|YP_819789.1|STER_0283|hypothetical protein STER_0283 [Streptococcus thermophilus LMD-9]_hit-name:pcsB _hit-score:34_hit-evalue:0.006_identity-percent:21.6981132075472	0	0	0	0	0	1	0	0	0	0	0	0	0	0	0	0	0	0	0	0	0	0	1	0	0	0	0	0	0	0	0	0	0	0	0	0	0	0	0	0	0	0	0	0	0
91	TQNSYEESQELDFQDAK	S8:+79.96633	a3.a1	gi|116627170|ref|YP_819789.1|STER_0283|hypothetical protein STER_0283 [Streptococcus thermophilus LMD-9]_hit-name:pcsB _hit-score:34_hit-evalue:0.006_identity-percent:21.6981132075472	2	0	0	2	0	1	1	0	0	0	0	0	0	0	0	0	0	0	0	1	1	0	1	2	0	0	0	0	0	0	0	0	2	0	2	2	0	2	0	0	0	0	0	0	0
96	QNSYEESQELDFQDAK	S3:+79.96633	a3.a1	gi|116627170|ref|YP_819789.1|STER_0283|hypothetical protein STER_0283 [Streptococcus thermophilus LMD-9]_hit-name:pcsB _hit-score:34_hit-evalue:0.006_identity-percent:21.6981132075472	0	0	0	1	0	0	0	0	0	0	0	0	0	0	0	0	0	0	0	0	0	0	0	0	0	0	0	0	0	0	0	0	0	0	0	0	0	0	0	0	0	0	0	0	0
93	SEDKTQNSYEESQELDFQDAK	S12:+79.96633	a3.a1	gi|116627170|ref|YP_819789.1|STER_0283|hypothetical protein STER_0283 [Streptococcus thermophilus LMD-9]_hit-name:pcsB _hit-score:34_hit-evalue:0.006_identity-percent:21.6981132075472	0	0	0	1	0	0	0	0	0	0	0	0	0	0	0	0	0	0	0	0	0	0	0	0	0	0	0	0	0	0	0	0	0	0	0	0	0	0	0	0	0	0	0	0	0
89	KTQNSYEESQELDFQDAK	S9:+79.96633	a3.a1	gi|116627170|ref|YP_819789.1|STER_0283|hypothetical protein STER_0283 [Streptococcus thermophilus LMD-9]_hit-name:pcsB _hit-score:34_hit-evalue:0.006_identity-percent:21.6981132075472	1	0	1	2	0	1	0	0	0	0	0	0	0	0	0	0	0	0	0	2	0	0	1	1	0	0	0	0	0	0	0	0	1	0	1	1	0	1	0	0	0	0	0	0	0
95	EESQELDFQDAK	S3:+79.96633	a3.a1	gi|116627170|ref|YP_819789.1|STER_0283|hypothetical protein STER_0283 [Streptococcus thermophilus LMD-9]_hit-name:pcsB _hit-score:34_hit-evalue:0.006_identity-percent:21.6981132075472	0	0	0	1	0	0	0	0	0	0	0	0	0	0	0	0	0	0	0	0	0	0	0	0	0	0	0	0	0	0	0	0	0	0	0	1	0	0	0	0	0	0	0	0	0
97	KIEADGDTSPLDAFIQK	T8:+79.96633	a3.a2	gi|116627170|ref|YP_819789.1|STER_0283|hypothetical protein STER_0283 [Streptococcus thermophilus LMD-9]_hit-name:pcsB _hit-score:34_hit-evalue:0.006_identity-percent:21.6981132075472	1	0	1	0	0	1	1	0	0	0	0	0	0	0	0	0	0	0	0	2	2	0	2	1	0	0	0	0	0	0	0	0	1	0	3	1	0	2	0	0	0	0	0	0	0
98	KIEADGDTSPLDAFIQK	S9:+79.96633	a3.a2	gi|116627170|ref|YP_819789.1|STER_0283|hypothetical protein STER_0283 [Streptococcus thermophilus LMD-9]_hit-name:pcsB _hit-score:34_hit-evalue:0.006_identity-percent:21.6981132075472	1	0	0	1	0	1	1	0	1	1	0	1	0	0	0	0	0	0	0	1	0	0	1	2	0	1	0	0	1	1	0	0	2	0	0	1	0	2	0	0	0	0	0	0	0
99	IEADGDTSPLDAFIQK	T7:+79.96633	a3.a2	gi|116627170|ref|YP_819789.1|STER_0283|hypothetical protein STER_0283 [Streptococcus thermophilus LMD-9]_hit-name:pcsB _hit-score:34_hit-evalue:0.006_identity-percent:21.6981132075472	1	0	0	1	0	0	0	0	0	0	0	0	0	0	0	0	0	0	0	0	0	0	0	0	0	0	0	0	0	0	0	0	0	0	0	1	0	0	0	0	0	0	0	0	0
100	IEADGDTSPLDAFIQK	S8:+79.96633	a3.a2	gi|116627170|ref|YP_819789.1|STER_0283|hypothetical protein STER_0283 [Streptococcus thermophilus LMD-9]_hit-name:pcsB _hit-score:34_hit-evalue:0.006_identity-percent:21.6981132075472	0	0	0	0	0	0	0	0	0	0	0	0	0	0	0	0	0	0	0	1	0	0	0	0	0	0	0	0	0	0	0	0	0	0	0	0	0	0	0	0	0	0	0	0	0
102	EAEINAGVTETDSILDK	T11:+79.96633	a3.a3	gi|116627170|ref|YP_819789.1|STER_0283|hypothetical protein STER_0283 [Streptococcus thermophilus LMD-9]_hit-name:pcsB _hit-score:34_hit-evalue:0.006_identity-percent:21.6981132075472	0	0	0	0	0	0	0	0	0	0	0	0	0	0	0	0	0	0	0	0	0	0	0	0	0	0	0	0	1	0	0	0	0	0	0	0	0	0	0	0	0	0	0	0	0
101	EAEINAGVTETDSILDK	T9:+79.96633	a3.a3	gi|116627170|ref|YP_819789.1|STER_0283|hypothetical protein STER_0283 [Streptococcus thermophilus LMD-9]_hit-name:pcsB _hit-score:34_hit-evalue:0.006_identity-percent:21.6981132075472	0	0	0	0	0	0	0	0	1	0	0	0	0	0	0	0	0	0	0	1	0	0	0	0	0	1	0	0	0	0	0	0	1	0	0	0	0	1	0	0	0	0	0	0	0
103	QRQEFADSGLIGQTLANESTNSTTADETVTPITSGFGTTETK	S19:+79.96633	a3.a4	gi|116627170|ref|YP_819789.1|STER_0283|hypothetical protein STER_0283 [Streptococcus thermophilus LMD-9]_hit-name:pcsB _hit-score:34_hit-evalue:0.006_identity-percent:21.6981132075472	0	0	0	0	0	0	0	0	0	0	0	0	0	0	0	0	0	0	0	0	0	0	0	0	0	0	0	0	0	0	0	0	1	0	0	0	0	0	0	0	0	0	0	0	0
105	QRQEFADSGLIGQTLANESTNSTTADETVTPITSGFGTTETK	S22:+79.96633	a3.a4	gi|116627170|ref|YP_819789.1|STER_0283|hypothetical protein STER_0283 [Streptococcus thermophilus LMD-9]_hit-name:pcsB _hit-score:34_hit-evalue:0.006_identity-percent:21.6981132075472	0	0	0	0	0	0	0	0	0	0	0	0	0	0	0	0	0	0	0	0	0	0	0	0	0	0	0	0	0	0	0	0	0	0	0	0	0	0	0	0	0	0	0	0	0
106	QRQEFADSGLIGQTLANESTNSTTADETVTPITSGFGTTETK	T33:+79.96633	a3.a4	gi|116627170|ref|YP_819789.1|STER_0283|hypothetical protein STER_0283 [Streptococcus thermophilus LMD-9]_hit-name:pcsB _hit-score:34_hit-evalue:0.006_identity-percent:21.6981132075472	0	0	0	0	0	0	0	0	0	0	0	0	0	0	0	0	0	0	0	1	0	0	0	0	0	0	0	0	0	0	0	0	0	0	0	0	0	0	0	0	0	0	0	0	0
107	QRQEFADSGLIGQTLANESTNSTTADETVTPITSGFGTTETK	T14:+79.96633	a3.a4	gi|116627170|ref|YP_819789.1|STER_0283|hypothetical protein STER_0283 [Streptococcus thermophilus LMD-9]_hit-name:pcsB _hit-score:34_hit-evalue:0.006_identity-percent:21.6981132075472	0	0	0	0	0	0	0	0	0	0	0	0	0	0	0	0	0	0	0	1	0	0	0	0	0	0	0	0	0	0	0	0	0	0	0	0	0	0	0	0	0	0	0	0	0
104	QRQEFADSGLIGQTLANESTNSTTADETVTPITSGFGTTETK	S8:+79.96633	a3.a4	gi|116627170|ref|YP_819789.1|STER_0283|hypothetical protein STER_0283 [Streptococcus thermophilus LMD-9]_hit-name:pcsB _hit-score:34_hit-evalue:0.006_identity-percent:21.6981132075472	0	0	0	1	0	0	0	0	0	0	0	0	0	0	0	0	0	0	0	0	0	0	0	1	0	0	0	0	0	0	0	0	0	0	0	0	0	0	0	0	0	0	0	0	0
108	ASEPQASKPLLEDVEVSETIDSEAIATTVAGVTGVK	S17:+79.96633	a3.a5	gi|116627170|ref|YP_819789.1|STER_0283|hypothetical protein STER_0283 [Streptococcus thermophilus LMD-9]_hit-name:pcsB _hit-score:34_hit-evalue:0.006_identity-percent:21.6981132075472	0	0	0	0	0	0	1	0	0	0	0	0	0	0	0	0	0	0	0	0	0	0	0	0	0	0	0	0	0	0	0	0	0	0	0	0	0	0	0	0	0	0	0	0	0
113	APAAPATDPGMMGY	T7:+79.96633	a4.a1	gi|116627146|ref|YP_819765.1|STER_0253|groEL|Chaperonin GroEL (HSP60 family) [Streptococcus thermophilus LMD-9]_hit-name:groEL _hit-score:962_hit-evalue:0.0_identity-percent:95.5473098330241	0	0	0	0	0	0	1	0	0	0	0	0	0	0	0	0	0	0	0	0	0	0	0	0	0	0	0	0	0	0	0	0	0	0	0	0	0	0	0	0	0	0	0	0	0
110	APAAPATDPGMMGY	M12:+15.99491 - Y14:+79.96633	a4.a1	gi|116627146|ref|YP_819765.1|STER_0253|groEL|Chaperonin GroEL (HSP60 family) [Streptococcus thermophilus LMD-9]_hit-name:groEL _hit-score:962_hit-evalue:0.0_identity-percent:95.5473098330241	1	0	0	1	0	0	1	0	0	1	0	0	0	0	0	0	0	0	0	1	0	1	0	0	0	0	0	0	0	0	0	0	1	0	1	1	0	0	0	0	0	1	0	0	0
111	APAAPATDPGMMGY	M11:+15.99491 - Y14:+79.96633	a4.a1	gi|116627146|ref|YP_819765.1|STER_0253|groEL|Chaperonin GroEL (HSP60 family) [Streptococcus thermophilus LMD-9]_hit-name:groEL _hit-score:962_hit-evalue:0.0_identity-percent:95.5473098330241	1	0	0	0	0	0	1	0	0	1	0	0	0	0	0	0	0	0	0	1	0	0	0	0	0	0	0	0	0	0	0	0	0	0	0	1	0	0	1	0	0	1	0	0	0
112	APAAPATDPGMMGY	Y14:+79.96633	a4.a1	gi|116627146|ref|YP_819765.1|STER_0253|groEL|Chaperonin GroEL (HSP60 family) [Streptococcus thermophilus LMD-9]_hit-name:groEL _hit-score:962_hit-evalue:0.0_identity-percent:95.5473098330241	1	0	1	1	0	1	2	0	2	2	0	1	0	1	0	0	0	0	1	1	0	1	1	0	0	1	0	1	1	0	1	1	2	0	1	2	0	1	2	0	1	1	1	1	1
109	APAAPATDPGMMGY	M11:+15.99491 - M12:+15.99491 - Y14:+79.96633	a4.a1	gi|116627146|ref|YP_819765.1|STER_0253|groEL|Chaperonin GroEL (HSP60 family) [Streptococcus thermophilus LMD-9]_hit-name:groEL _hit-score:962_hit-evalue:0.0_identity-percent:95.5473098330241	1	0	0	1	0	1	1	0	0	1	0	1	0	0	0	0	0	0	0	1	0	0	1	0	0	1	0	0	1	0	0	0	1	0	1	2	0	0	0	0	0	0	0	0	0
115	SQLETTTSEFDREK	S1:+79.96633	a4.a2	gi|116627146|ref|YP_819765.1|STER_0253|groEL|Chaperonin GroEL (HSP60 family) [Streptococcus thermophilus LMD-9]_hit-name:groEL _hit-score:962_hit-evalue:0.0_identity-percent:95.5473098330241	1	0	0	1	0	0	0	0	0	0	0	0	0	0	0	0	0	0	0	0	0	0	0	0	0	0	0	0	0	0	0	0	0	0	0	0	0	0	0	0	0	0	0	0	0
116	SQLETTTSEFDREK	S8:+79.96633	a4.a2	gi|116627146|ref|YP_819765.1|STER_0253|groEL|Chaperonin GroEL (HSP60 family) [Streptococcus thermophilus LMD-9]_hit-name:groEL _hit-score:962_hit-evalue:0.0_identity-percent:95.5473098330241	0	0	0	0	0	1	0	0	0	0	0	0	0	0	0	0	0	0	0	0	1	0	0	0	0	0	0	0	0	0	0	0	0	0	0	0	0	0	0	0	0	0	0	0	0
114	SQLETTTSEFDREK	T6:+79.96633	a4.a2	gi|116627146|ref|YP_819765.1|STER_0253|groEL|Chaperonin GroEL (HSP60 family) [Streptococcus thermophilus LMD-9]_hit-name:groEL _hit-score:962_hit-evalue:0.0_identity-percent:95.5473098330241	1	0	1	0	1	0	0	0	0	0	0	0	0	0	0	0	0	0	0	1	0	0	0	0	0	0	0	0	0	0	0	0	0	0	0	0	0	0	0	0	0	0	0	0	0
117	VNLIKSQLETTTSEFDREK	S6:+79.96633	a4.a2	gi|116627146|ref|YP_819765.1|STER_0253|groEL|Chaperonin GroEL (HSP60 family) [Streptococcus thermophilus LMD-9]_hit-name:groEL _hit-score:962_hit-evalue:0.0_identity-percent:95.5473098330241	1	0	0	0	0	0	0	0	0	0	0	0	0	0	0	0	0	0	0	0	0	0	0	0	0	0	0	0	0	0	0	0	0	0	0	0	0	0	0	0	0	0	0	0	0
118	TSRPLLIIADDVAGEALPTLVLNK	T1:+79.96633	a4.a3	gi|116627146|ref|YP_819765.1|STER_0253|groEL|Chaperonin GroEL (HSP60 family) [Streptococcus thermophilus LMD-9]_hit-name:groEL _hit-score:962_hit-evalue:0.0_identity-percent:95.5473098330241	0	1	0	0	0	0	0	0	0	0	0	0	0	0	0	0	0	0	0	1	0	0	0	0	0	0	0	0	0	0	0	0	1	0	0	0	1	0	0	0	0	0	0	0	0
119	TSRPLLIIADDVAGEALPTLVLNK	S2:+79.96633	a4.a3	gi|116627146|ref|YP_819765.1|STER_0253|groEL|Chaperonin GroEL (HSP60 family) [Streptococcus thermophilus LMD-9]_hit-name:groEL _hit-score:962_hit-evalue:0.0_identity-percent:95.5473098330241	0	0	0	0	0	0	0	0	0	0	0	0	0	0	0	0	0	0	0	0	0	1	0	0	0	0	0	0	0	0	0	0	0	0	0	1	0	0	0	0	0	0	0	0	0
120	TNDIAGDGTTTATVLTQAIVR	T9:+79.96633	a4.a4	gi|116627146|ref|YP_819765.1|STER_0253|groEL|Chaperonin GroEL (HSP60 family) [Streptococcus thermophilus LMD-9]_hit-name:groEL _hit-score:962_hit-evalue:0.0_identity-percent:95.5473098330241	0	1	0	0	1	0	0	0	0	0	0	0	0	0	0	0	0	0	0	0	0	0	0	0	0	0	0	0	0	0	0	0	0	0	0	0	0	0	0	0	0	0	0	0	0
121	TNDIAGDGTTTATVLTQAIVR	T11:+79.96633	a4.a4	gi|116627146|ref|YP_819765.1|STER_0253|groEL|Chaperonin GroEL (HSP60 family) [Streptococcus thermophilus LMD-9]_hit-name:groEL _hit-score:962_hit-evalue:0.0_identity-percent:95.5473098330241	0	0	0	0	0	0	0	0	0	0	0	0	0	0	0	0	0	0	0	0	0	0	0	0	0	0	0	0	0	0	0	0	1	0	0	0	0	0	0	0	0	0	0	0	0
122	DATMESLGQASK	S6:+79.96633	a4.a5	gi|116627146|ref|YP_819765.1|STER_0253|groEL|Chaperonin GroEL (HSP60 family) [Streptococcus thermophilus LMD-9]_hit-name:groEL _hit-score:962_hit-evalue:0.0_identity-percent:95.5473098330241	1	0	0	0	0	0	0	0	0	0	0	0	0	0	0	0	0	0	0	0	0	0	0	0	0	0	0	0	0	0	0	0	0	0	0	0	0	0	0	0	0	0	0	0	0
123	DATMESLGQASK	S11:+79.96633	a4.a5	gi|116627146|ref|YP_819765.1|STER_0253|groEL|Chaperonin GroEL (HSP60 family) [Streptococcus thermophilus LMD-9]_hit-name:groEL _hit-score:962_hit-evalue:0.0_identity-percent:95.5473098330241	0	0	0	1	0	0	0	0	0	0	0	0	0	0	0	0	0	0	0	0	0	0	0	0	0	0	0	0	0	0	0	0	0	0	0	0	0	0	0	0	0	0	0	0	0
124	IRGTFNVVAVK	T4:+79.96633	a4.a6	gi|116627146|ref|YP_819765.1|STER_0253|groEL|Chaperonin GroEL (HSP60 family) [Streptococcus thermophilus LMD-9]_hit-name:groEL _hit-score:962_hit-evalue:0.0_identity-percent:95.5473098330241	1	0	0	0	0	0	0	0	0	0	0	0	0	0	0	0	0	0	0	1	0	0	0	0	0	0	0	0	0	0	0	0	0	0	0	0	0	0	0	0	0	0	0	0	0
125	LSGGVAVIK	S2:+79.96633	a4.a7	gi|116627146|ref|YP_819765.1|STER_0253|groEL|Chaperonin GroEL (HSP60 family) [Streptococcus thermophilus LMD-9]_hit-name:groEL _hit-score:962_hit-evalue:0.0_identity-percent:95.5473098330241	0	1	0	0	0	0	0	0	0	0	0	0	0	0	0	0	0	0	1	0	0	0	0	0	0	0	0	0	0	0	0	0	0	0	0	0	0	0	0	0	0	0	0	0	0
126	EAIAQVAAVSSR	S10:+79.96633	a4.a8	gi|116627146|ref|YP_819765.1|STER_0253|groEL|Chaperonin GroEL (HSP60 family) [Streptococcus thermophilus LMD-9]_hit-name:groEL _hit-score:962_hit-evalue:0.0_identity-percent:95.5473098330241	0	0	0	0	0	0	0	0	0	0	0	0	0	0	0	0	0	0	0	0	0	0	0	0	0	0	0	0	0	0	0	0	1	0	0	0	0	0	0	0	0	0	0	0	0
127	VGNDGVITIEESR	T8:+79.96633	a4.a9	gi|116627146|ref|YP_819765.1|STER_0253|groEL|Chaperonin GroEL (HSP60 family) [Streptococcus thermophilus LMD-9]_hit-name:groEL _hit-score:962_hit-evalue:0.0_identity-percent:95.5473098330241	0	0	0	0	0	0	0	0	0	0	0	0	0	0	0	0	0	0	0	0	0	0	0	0	0	0	0	0	0	0	0	0	0	0	0	0	0	0	0	0	0	0	0	0	0
128	VTVDKDSTVIVEGAGSAEAIANR	S7:+79.96633 - T2:+79.96633	a4.b10	gi|116627146|ref|YP_819765.1|STER_0253|groEL|Chaperonin GroEL (HSP60 family) [Streptococcus thermophilus LMD-9]_hit-name:groEL _hit-score:962_hit-evalue:0.0_identity-percent:95.5473098330241	0	0	0	1	0	0	0	0	0	0	0	0	0	0	0	0	0	0	0	0	0	0	0	0	0	0	0	0	0	0	0	0	0	0	0	0	0	0	0	0	0	0	0	0	0
129	QIAYNAGYEGSVIIDK	S11:+79.96633	a4.b11	gi|116627146|ref|YP_819765.1|STER_0253|groEL|Chaperonin GroEL (HSP60 family) [Streptococcus thermophilus LMD-9]_hit-name:groEL _hit-score:962_hit-evalue:0.0_identity-percent:95.5473098330241	0	0	0	0	0	0	0	0	0	0	0	0	0	0	0	0	0	0	0	0	0	0	1	0	0	0	0	0	0	0	0	0	0	0	0	0	0	0	0	0	0	0	0	0	0
130	SALQNAASVASLILTTEAVVADKPEQK	S8:+79.96633	a4.b12	gi|116627146|ref|YP_819765.1|STER_0253|groEL|Chaperonin GroEL (HSP60 family) [Streptococcus thermophilus LMD-9]_hit-name:groEL _hit-score:962_hit-evalue:0.0_identity-percent:95.5473098330241	1	0	0	0	0	0	0	0	0	0	0	0	0	0	0	0	0	0	0	0	0	0	0	0	0	0	0	0	0	0	0	0	0	0	0	0	0	0	0	0	0	0	0	0	0
131	YASLDDSVIPDAENLK	S7:+79.96633	a5.a1	gi|116627940|ref|YP_820559.1|STER_1172|Phosphoglycerate mutase 1 [Streptococcus thermophilus LMD-9]_hit-name:gpmA _hit-score:469_hit-evalue:1e-134_identity-percent:100	2	1	2	0	2	2	0	2	2	1	2	2	0	0	0	0	0	0	2	2	2	0	2	3	1	1	0	1	1	0	0	0	1	2	2	1	1	2	0	0	0	1	0	0	0
132	YASLDDSVIPDAENLK	S3:+79.96633	a5.a1	gi|116627940|ref|YP_820559.1|STER_1172|Phosphoglycerate mutase 1 [Streptococcus thermophilus LMD-9]_hit-name:gpmA _hit-score:469_hit-evalue:1e-134_identity-percent:100	1	0	0	1	0	0	0	0	0	0	0	0	0	0	0	0	0	0	0	0	1	0	0	1	0	0	0	0	0	0	0	0	1	0	0	0	0	1	0	0	0	0	0	0	0
133	YASLDDSVIPDAENLK	Y1:+79.96633	a5.a1	gi|116627940|ref|YP_820559.1|STER_1172|Phosphoglycerate mutase 1 [Streptococcus thermophilus LMD-9]_hit-name:gpmA _hit-score:469_hit-evalue:1e-134_identity-percent:100	0	0	0	0	0	0	0	0	0	0	0	0	0	0	0	0	0	0	0	0	0	0	0	0	0	0	0	0	0	0	0	0	0	0	0	0	1	0	0	0	0	0	0	0	0
134	YASLDDSVIPDAENLKVTLER	S7:+79.96633	a5.a1	gi|116627940|ref|YP_820559.1|STER_1172|Phosphoglycerate mutase 1 [Streptococcus thermophilus LMD-9]_hit-name:gpmA _hit-score:469_hit-evalue:1e-134_identity-percent:100	0	0	0	0	0	0	0	0	0	0	0	0	0	0	0	0	0	0	0	0	1	0	0	0	0	0	0	0	0	0	0	0	1	1	0	0	0	0	0	0	0	0	0	0	0
135	HYGGLTGK	Y2:+79.96633	a5.a2	gi|116627940|ref|YP_820559.1|STER_1172|Phosphoglycerate mutase 1 [Streptococcus thermophilus LMD-9]_hit-name:gpmA _hit-score:469_hit-evalue:1e-134_identity-percent:100	1	0	0	0	0	0	0	0	0	0	0	0	0	0	0	0	0	0	0	0	0	0	0	0	0	0	0	0	0	0	0	0	0	0	0	0	0	0	0	0	0	0	0	0	0
137	TIVFNTNHDILDGTETVISGASCTTNCLAPMAK	C23:+57.02146 - C27:+57.02146 - M31:+15.99491 - S19:+79.96633 - S22:+79.96633	a6.a1	gi|116628477|ref|YP_821096.1|STER_1761|Glyceraldehyde-3-phosphate dehydrogenase [Streptococcus thermophilus LMD-9]_hit-name:gapA1 _hit-score:633_hit-evalue:0.0_identity-percent:94.6428571428571	0	0	0	0	0	0	0	0	0	0	0	0	0	0	0	0	0	0	0	1	0	0	0	0	0	0	0	0	0	0	0	0	0	0	0	0	0	0	0	0	0	0	0	0	0
136	TIVFNTNHDILDGTETVISGASCTTNCLAPMAK	C23:+57.02146 - C27:+57.02146 - M31:+15.99491 - T24:+79.96633 - T25:+79.96633	a6.a1	gi|116628477|ref|YP_821096.1|STER_1761|Glyceraldehyde-3-phosphate dehydrogenase [Streptococcus thermophilus LMD-9]_hit-name:gapA1 _hit-score:633_hit-evalue:0.0_identity-percent:94.6428571428571	0	1	0	0	0	0	0	0	0	0	0	0	0	0	0	0	0	0	0	0	0	0	1	1	0	0	0	0	0	0	0	0	0	0	0	0	0	0	0	0	0	0	0	0	0
141	TIVFNTNHDILDGTETVISGASCTTNCLAPMAK	C23:+57.02146 - C27:+57.02146 - T24:+79.96633 - T25:+79.96633	a6.a1	gi|116628477|ref|YP_821096.1|STER_1761|Glyceraldehyde-3-phosphate dehydrogenase [Streptococcus thermophilus LMD-9]_hit-name:gapA1 _hit-score:633_hit-evalue:0.0_identity-percent:94.6428571428571	0	0	1	0	0	0	0	0	0	0	0	0	0	0	0	0	0	0	0	1	0	0	0	0	0	0	0	0	0	0	0	0	0	0	1	0	0	0	0	0	0	0	0	0	0
138	TIVFNTNHDILDGTETVISGASCTTNCLAPMAK	C23:+57.02146 - C27:+57.02146 - M31:+15.99491 - T16:+79.96633 - T25:+79.96633	a6.a1	gi|116628477|ref|YP_821096.1|STER_1761|Glyceraldehyde-3-phosphate dehydrogenase [Streptococcus thermophilus LMD-9]_hit-name:gapA1 _hit-score:633_hit-evalue:0.0_identity-percent:94.6428571428571	0	0	0	0	0	0	0	0	0	0	0	0	0	0	0	0	0	0	0	0	0	0	0	0	0	0	0	0	0	0	0	0	0	0	0	0	1	0	0	0	0	0	0	0	0
139	TIVFNTNHDILDGTETVISGASCTTNCLAPMAK	C23:+57.02146 - C27:+57.02146 - M31:+15.99491 - S19:+79.96633 - T24:+79.96633	a6.a1	gi|116628477|ref|YP_821096.1|STER_1761|Glyceraldehyde-3-phosphate dehydrogenase [Streptococcus thermophilus LMD-9]_hit-name:gapA1 _hit-score:633_hit-evalue:0.0_identity-percent:94.6428571428571	1	0	0	0	0	0	0	0	0	0	0	0	0	0	0	0	0	0	0	1	0	0	0	0	0	0	0	0	0	0	0	0	0	0	0	0	0	0	0	0	0	0	0	0	0
140	TIVFNTNHDILDGTETVISGASCTTNCLAPMAK	C23:+57.02146 - C27:+57.02146 - M31:+15.99491 - S22:+79.96633 - T25:+79.96633	a6.a1	gi|116628477|ref|YP_821096.1|STER_1761|Glyceraldehyde-3-phosphate dehydrogenase [Streptococcus thermophilus LMD-9]_hit-name:gapA1 _hit-score:633_hit-evalue:0.0_identity-percent:94.6428571428571	0	0	1	0	0	0	0	0	0	0	0	0	0	0	0	0	0	0	0	0	0	0	0	0	0	0	0	0	0	0	0	0	0	0	0	0	0	0	0	0	0	0	0	0	0
149	TIVFNTNHDILDGTETVISGASCTTNCLAPMAK	C23:+57.02146 - C27:+57.02146 - T14:+79.96633 - T24:+79.96633	a6.a1	gi|116628477|ref|YP_821096.1|STER_1761|Glyceraldehyde-3-phosphate dehydrogenase [Streptococcus thermophilus LMD-9]_hit-name:gapA1 _hit-score:633_hit-evalue:0.0_identity-percent:94.6428571428571	0	0	0	0	0	0	0	0	0	0	0	0	0	0	0	0	0	0	0	0	0	0	0	0	0	0	0	0	0	0	0	0	0	0	0	0	0	0	0	0	0	0	0	0	0
150	TIVFNTNHDILDGTETVISGASCTTNCLAPMAK	C23:+57.02146 - C27:+57.02146 - M31:+15.99491 - T24:+79.96633	a6.a1	gi|116628477|ref|YP_821096.1|STER_1761|Glyceraldehyde-3-phosphate dehydrogenase [Streptococcus thermophilus LMD-9]_hit-name:gapA1 _hit-score:633_hit-evalue:0.0_identity-percent:94.6428571428571	0	0	0	0	0	0	0	0	0	0	0	0	0	0	0	0	0	0	0	0	0	0	0	0	0	0	0	0	0	0	0	0	0	0	0	0	0	0	0	0	0	0	0	0	0
151	TIVFNTNHDILDGTETVISGASCTTNCLAPMAK	C23:+57.02146 - C27:+57.02146 - M31:+15.99491 - S22:+79.96633	a6.a1	gi|116628477|ref|YP_821096.1|STER_1761|Glyceraldehyde-3-phosphate dehydrogenase [Streptococcus thermophilus LMD-9]_hit-name:gapA1 _hit-score:633_hit-evalue:0.0_identity-percent:94.6428571428571	0	0	0	0	0	0	0	0	0	0	0	0	0	0	0	0	0	0	0	0	0	0	0	1	0	0	0	0	0	0	0	0	0	0	0	0	1	0	0	0	0	0	0	0	0
152	TIVFNTNHDILDGTETVISGASCTTNCLAPMAK	C23:+57.02146 - C27:+57.02146 - M31:+15.99491 - T25:+79.96633	a6.a1	gi|116628477|ref|YP_821096.1|STER_1761|Glyceraldehyde-3-phosphate dehydrogenase [Streptococcus thermophilus LMD-9]_hit-name:gapA1 _hit-score:633_hit-evalue:0.0_identity-percent:94.6428571428571	0	0	0	0	0	0	0	0	0	0	0	0	0	0	0	0	0	0	0	0	0	0	0	0	0	0	0	0	0	0	0	0	0	1	0	0	0	0	0	0	0	0	0	0	0
153	TIVFNTNHDILDGTETVISGASCTTNCLAPMAK	C23:+57.02146 - C27:+57.02146 - M31:+15.99491 - S19:+79.96633	a6.a1	gi|116628477|ref|YP_821096.1|STER_1761|Glyceraldehyde-3-phosphate dehydrogenase [Streptococcus thermophilus LMD-9]_hit-name:gapA1 _hit-score:633_hit-evalue:0.0_identity-percent:94.6428571428571	0	0	0	0	0	0	0	0	0	0	0	0	0	0	0	0	0	0	0	0	0	0	0	0	0	0	0	0	0	0	0	0	0	0	0	0	0	0	0	0	0	0	0	0	0
154	TIVFNTNHDILDGTETVISGASCTTNCLAPMAK	C23:+57.02146 - C27:+57.02146 - T24:+79.96633	a6.a1	gi|116628477|ref|YP_821096.1|STER_1761|Glyceraldehyde-3-phosphate dehydrogenase [Streptococcus thermophilus LMD-9]_hit-name:gapA1 _hit-score:633_hit-evalue:0.0_identity-percent:94.6428571428571	0	0	0	0	0	0	0	0	0	0	0	0	0	0	0	0	0	0	0	0	0	0	0	0	0	0	0	0	0	0	0	0	0	0	0	0	0	0	0	0	0	0	0	0	0
142	TIVFNTNHDILDGTETVISGASCTTNCLAPMAK	C23:+57.02146 - C27:+57.02146 - S22:+79.96633 - T24:+79.96633	a6.a1	gi|116628477|ref|YP_821096.1|STER_1761|Glyceraldehyde-3-phosphate dehydrogenase [Streptococcus thermophilus LMD-9]_hit-name:gapA1 _hit-score:633_hit-evalue:0.0_identity-percent:94.6428571428571	0	0	0	0	0	0	0	0	0	0	0	0	0	0	0	0	0	0	0	0	0	0	0	0	0	0	0	0	0	0	0	0	0	0	0	0	0	0	0	0	0	0	0	0	0
143	TIVFNTNHDILDGTETVISGASCTTNCLAPMAK	C23:+57.02146 - C27:+57.02146 - S19:+79.96633 - T25:+79.96633	a6.a1	gi|116628477|ref|YP_821096.1|STER_1761|Glyceraldehyde-3-phosphate dehydrogenase [Streptococcus thermophilus LMD-9]_hit-name:gapA1 _hit-score:633_hit-evalue:0.0_identity-percent:94.6428571428571	0	0	0	0	0	0	0	0	0	0	0	0	0	0	0	0	0	0	0	0	0	0	0	1	0	0	0	0	0	0	0	0	0	1	0	0	1	0	0	0	0	0	0	0	0
144	TIVFNTNHDILDGTETVISGASCTTNCLAPMAK	C23:+57.02146 - C27:+57.02146 - S22:+79.96633 - T25:+79.96633	a6.a1	gi|116628477|ref|YP_821096.1|STER_1761|Glyceraldehyde-3-phosphate dehydrogenase [Streptococcus thermophilus LMD-9]_hit-name:gapA1 _hit-score:633_hit-evalue:0.0_identity-percent:94.6428571428571	0	0	0	0	0	0	0	0	0	0	0	1	0	0	0	0	0	0	1	1	1	0	0	0	0	0	0	0	0	0	0	0	0	0	0	0	1	0	0	0	0	0	0	0	0
145	TIVFNTNHDILDGTETVISGASCTTNCLAPMAK	C23:+57.02146 - C27:+57.02146 - S19:+79.96633 - T24:+79.96633	a6.a1	gi|116628477|ref|YP_821096.1|STER_1761|Glyceraldehyde-3-phosphate dehydrogenase [Streptococcus thermophilus LMD-9]_hit-name:gapA1 _hit-score:633_hit-evalue:0.0_identity-percent:94.6428571428571	0	0	0	0	0	0	0	0	0	0	0	0	0	0	0	0	0	0	0	0	0	2	0	0	0	0	0	0	0	0	0	0	0	1	0	0	0	0	0	0	0	0	0	0	0
146	TIVFNTNHDILDGTETVISGASCTTNCLAPMAK	C23:+57.02146 - C27:+57.02146 - S22:+79.96633 - T16:+79.96633	a6.a1	gi|116628477|ref|YP_821096.1|STER_1761|Glyceraldehyde-3-phosphate dehydrogenase [Streptococcus thermophilus LMD-9]_hit-name:gapA1 _hit-score:633_hit-evalue:0.0_identity-percent:94.6428571428571	0	0	0	0	0	1	0	0	0	0	0	0	0	0	0	0	0	0	0	0	0	0	0	0	0	0	0	0	0	0	0	0	0	0	0	0	0	0	0	0	0	0	0	0	0
147	TIVFNTNHDILDGTETVISGASCTTNCLAPMAK	C23:+57.02146 - C27:+57.02146 - S19:+79.96633 - S22:+79.96633	a6.a1	gi|116628477|ref|YP_821096.1|STER_1761|Glyceraldehyde-3-phosphate dehydrogenase [Streptococcus thermophilus LMD-9]_hit-name:gapA1 _hit-score:633_hit-evalue:0.0_identity-percent:94.6428571428571	0	0	0	0	1	0	0	0	0	0	0	0	0	0	0	0	0	0	0	0	0	0	1	0	0	0	0	0	0	0	0	0	0	0	0	0	0	0	0	0	0	0	0	0	0
148	TIVFNTNHDILDGTETVISGASCTTNCLAPMAK	C23:+57.02146 - C27:+57.02146 - T14:+79.96633 - T16:+79.96633	a6.a1	gi|116628477|ref|YP_821096.1|STER_1761|Glyceraldehyde-3-phosphate dehydrogenase [Streptococcus thermophilus LMD-9]_hit-name:gapA1 _hit-score:633_hit-evalue:0.0_identity-percent:94.6428571428571	0	0	0	0	0	0	0	1	0	0	0	0	0	0	0	0	0	0	0	0	0	0	0	0	0	1	0	0	0	0	0	0	0	0	0	0	0	0	0	0	0	0	0	0	0
155	AGAANIVPNSTGAAK	S10:+79.96633	a6.a2	gi|116628477|ref|YP_821096.1|STER_1761|Glyceraldehyde-3-phosphate dehydrogenase [Streptococcus thermophilus LMD-9]_hit-name:gapA1 _hit-score:633_hit-evalue:0.0_identity-percent:94.6428571428571	1	1	1	1	1	1	0	0	0	0	0	0	0	0	0	0	0	0	1	1	1	1	1	1	0	0	0	0	0	0	0	0	1	1	1	1	0	0	0	0	0	0	0	0	0
157	AATNESYGYTEDPIVSSDIVGMSYGSLFDATQTK	S16:+79.96633	a6.a3	gi|116628477|ref|YP_821096.1|STER_1761|Glyceraldehyde-3-phosphate dehydrogenase [Streptococcus thermophilus LMD-9]_hit-name:gapA1 _hit-score:633_hit-evalue:0.0_identity-percent:94.6428571428571	2	0	0	0	0	0	0	0	0	0	0	0	0	0	0	0	0	0	0	0	0	0	1	0	0	0	0	0	0	0	0	0	0	0	0	0	0	0	0	0	0	0	0	0	0
158	AATNESYGYTEDPIVSSDIVGMSYGSLFDATQTK	M22:+15.99491 - Y24:+79.96633	a6.a3	gi|116628477|ref|YP_821096.1|STER_1761|Glyceraldehyde-3-phosphate dehydrogenase [Streptococcus thermophilus LMD-9]_hit-name:gapA1 _hit-score:633_hit-evalue:0.0_identity-percent:94.6428571428571	0	0	0	1	0	0	0	0	0	0	0	0	0	0	0	0	0	0	0	0	0	0	0	0	0	0	0	0	0	0	0	0	0	0	0	0	0	0	0	0	0	0	0	0	0
156	AATNESYGYTEDPIVSSDIVGMSYGSLFDATQTK	S6:+79.96633	a6.a3	gi|116628477|ref|YP_821096.1|STER_1761|Glyceraldehyde-3-phosphate dehydrogenase [Streptococcus thermophilus LMD-9]_hit-name:gapA1 _hit-score:633_hit-evalue:0.0_identity-percent:94.6428571428571	0	0	0	0	0	0	0	0	0	0	0	0	0	0	0	0	0	0	0	0	0	0	0	0	0	0	0	0	0	0	0	0	1	0	0	1	0	0	0	0	0	0	0	0	0
161	AATNESYGYTEDPIVSSDIVGMSYGSLFDATQTK	S17:+79.96633	a6.a3	gi|116628477|ref|YP_821096.1|STER_1761|Glyceraldehyde-3-phosphate dehydrogenase [Streptococcus thermophilus LMD-9]_hit-name:gapA1 _hit-score:633_hit-evalue:0.0_identity-percent:94.6428571428571	0	0	0	0	0	0	0	0	0	0	0	0	0	0	0	0	0	0	0	0	0	0	1	0	0	0	0	0	0	0	0	0	0	0	0	0	0	0	0	0	0	0	0	0	0
159	AATNESYGYTEDPIVSSDIVGMSYGSLFDATQTK	Y9:+79.96633	a6.a3	gi|116628477|ref|YP_821096.1|STER_1761|Glyceraldehyde-3-phosphate dehydrogenase [Streptococcus thermophilus LMD-9]_hit-name:gapA1 _hit-score:633_hit-evalue:0.0_identity-percent:94.6428571428571	0	0	0	0	0	0	0	0	0	0	0	0	0	0	0	0	0	0	0	0	0	0	0	0	0	0	0	0	0	0	0	0	0	0	0	0	0	0	0	0	0	0	0	0	0
160	AATNESYGYTEDPIVSSDIVGMSYGSLFDATQTK	T3:+79.96633	a6.a3	gi|116628477|ref|YP_821096.1|STER_1761|Glyceraldehyde-3-phosphate dehydrogenase [Streptococcus thermophilus LMD-9]_hit-name:gapA1 _hit-score:633_hit-evalue:0.0_identity-percent:94.6428571428571	0	0	0	0	0	0	0	0	0	0	0	0	0	0	0	0	0	0	0	0	0	0	1	0	0	0	0	0	0	0	0	0	0	0	0	0	0	0	0	0	0	0	0	0	0
162	VDSVSSVGPEK	S5:+79.96633	a7.a1	gi|116628133|ref|YP_820752.1|STER_1392|serine/threonine protein kinase, fused to several beta-lactam (PASTA) domains [Streptococcus thermophilus LMD-9]_hit-name:pknB _hit-score:1052_hit-evalue:0.0_identity-percent:94.4922547332186	1	0	0	0	0	0	0	0	0	0	0	0	0	0	0	0	0	0	0	0	0	0	0	0	0	0	0	0	0	0	0	0	0	0	0	0	0	0	0	0	0	0	0	0	0
163	VVFDDMTDTKTLPK	M6:+15.99491 - T9:+79.96633	a7.a1	gi|116628133|ref|YP_820752.1|STER_1392|serine/threonine protein kinase, fused to several beta-lactam (PASTA) domains [Streptococcus thermophilus LMD-9]_hit-name:pknB _hit-score:1052_hit-evalue:0.0_identity-percent:94.4922547332186	2	0	0	2	0	0	0	0	0	0	0	0	0	0	0	0	0	0	0	1	1	0	1	0	0	0	0	0	0	0	0	0	0	0	0	1	0	0	0	0	0	0	0	0	0
165	VVFDDMTDTKTLPK	T7:+79.96633	a7.a1	gi|116628133|ref|YP_820752.1|STER_1392|serine/threonine protein kinase, fused to several beta-lactam (PASTA) domains [Streptococcus thermophilus LMD-9]_hit-name:pknB _hit-score:1052_hit-evalue:0.0_identity-percent:94.4922547332186	0	0	1	0	0	0	0	0	0	0	0	0	0	0	0	0	0	0	0	0	0	0	0	0	0	0	0	0	0	0	0	0	0	0	0	0	0	0	0	0	0	0	0	0	0
166	VVFDDMTDTKTLPK	M6:+15.99491 - T7:+79.96633	a7.a1	gi|116628133|ref|YP_820752.1|STER_1392|serine/threonine protein kinase, fused to several beta-lactam (PASTA) domains [Streptococcus thermophilus LMD-9]_hit-name:pknB _hit-score:1052_hit-evalue:0.0_identity-percent:94.4922547332186	0	0	0	0	0	1	0	0	0	0	0	0	0	0	0	0	0	0	0	0	0	0	0	0	0	0	0	0	0	0	0	0	0	0	0	0	0	0	0	0	0	0	0	0	0
167	VVFDDMTDTKTLPKVDSVSSVGPEK	T11:+79.96633	a7.a1	gi|116628133|ref|YP_820752.1|STER_1392|serine/threonine protein kinase, fused to several beta-lactam (PASTA) domains [Streptococcus thermophilus LMD-9]_hit-name:pknB _hit-score:1052_hit-evalue:0.0_identity-percent:94.4922547332186	0	0	0	0	0	0	0	0	0	0	0	0	0	0	0	0	0	0	0	0	0	0	0	0	0	0	0	0	0	0	0	0	1	0	0	0	0	0	0	0	0	0	0	0	0
164	VVFDDMTDTKTLPK	T9:+79.96633	a7.a1	gi|116628133|ref|YP_820752.1|STER_1392|serine/threonine protein kinase, fused to several beta-lactam (PASTA) domains [Streptococcus thermophilus LMD-9]_hit-name:pknB _hit-score:1052_hit-evalue:0.0_identity-percent:94.4922547332186	2	0	1	2	0	1	1	0	0	1	0	0	0	0	0	0	0	0	0	2	2	0	2	0	0	0	0	0	0	0	0	0	1	0	0	1	0	0	0	0	0	0	0	0	0
169	VVFDDMTDTKTLPKVDSVSSVGPEK	T7:+79.96633	a7.a1	gi|116628133|ref|YP_820752.1|STER_1392|serine/threonine protein kinase, fused to several beta-lactam (PASTA) domains [Streptococcus thermophilus LMD-9]_hit-name:pknB _hit-score:1052_hit-evalue:0.0_identity-percent:94.4922547332186	0	0	0	0	0	0	0	0	0	0	0	0	0	0	0	0	0	0	0	1	0	0	1	0	0	0	0	0	0	0	0	0	0	0	0	0	0	0	0	0	0	0	0	0	0
170	VVFDDMTDTK	M6:+15.99491 - T9:+79.96633	a7.a1	gi|116628133|ref|YP_820752.1|STER_1392|serine/threonine protein kinase, fused to several beta-lactam (PASTA) domains [Streptococcus thermophilus LMD-9]_hit-name:pknB _hit-score:1052_hit-evalue:0.0_identity-percent:94.4922547332186	0	0	0	0	0	0	0	0	0	0	0	0	0	0	0	0	0	0	0	0	0	0	1	0	0	0	0	0	0	0	0	0	0	0	0	0	0	0	0	0	0	0	0	0	0
171	VVFDDMTDTK	T9:+79.96633	a7.a1	gi|116628133|ref|YP_820752.1|STER_1392|serine/threonine protein kinase, fused to several beta-lactam (PASTA) domains [Streptococcus thermophilus LMD-9]_hit-name:pknB _hit-score:1052_hit-evalue:0.0_identity-percent:94.4922547332186	0	0	0	0	0	0	0	0	0	0	0	0	0	0	0	0	0	0	0	0	0	0	0	0	0	1	0	0	1	0	0	0	0	0	0	0	0	0	0	0	0	0	0	0	0
168	VVFDDMTDTKTLPKVDSVSSVGPEK	T9:+79.96633	a7.a1	gi|116628133|ref|YP_820752.1|STER_1392|serine/threonine protein kinase, fused to several beta-lactam (PASTA) domains [Streptococcus thermophilus LMD-9]_hit-name:pknB _hit-score:1052_hit-evalue:0.0_identity-percent:94.4922547332186	0	0	0	1	0	0	0	0	0	0	0	0	0	0	0	0	0	0	0	0	0	0	0	0	0	0	0	0	0	0	0	0	0	0	0	0	0	0	0	0	0	0	0	0	0
172	VTDFGIAVAFAETSLTQTNSMLGSVHYLSPEQAR	S14:+79.96633	a7.a2	gi|116628133|ref|YP_820752.1|STER_1392|serine/threonine protein kinase, fused to several beta-lactam (PASTA) domains [Streptococcus thermophilus LMD-9]_hit-name:pknB _hit-score:1052_hit-evalue:0.0_identity-percent:94.4922547332186	0	0	0	0	0	0	0	0	0	0	0	0	1	0	0	0	0	0	0	0	0	0	0	0	0	0	0	0	0	0	0	0	0	0	0	0	0	0	0	0	0	0	0	0	0
173	TENASAGVMISASHNPALDNGIK	M9:+15.99491 - S13:+79.96633	a8.a1	gi|116627995|ref|YP_820614.1|STER_1230|Phosphomannomutase [Streptococcus thermophilus LMD-9]_hit-name:pgmA _hit-score:49_hit-evalue:2e-07_identity-percent:37.0967741935484	1	1	1	1	0	0	0	0	0	0	0	0	0	0	0	0	0	0	1	1	1	0	1	1	0	0	0	0	0	0	0	0	0	0	0	0	1	0	0	0	0	0	0	0	0
174	TENASAGVMISASHNPALDNGIK	M9:+15.99491 - S11:+79.96633	a8.a1	gi|116627995|ref|YP_820614.1|STER_1230|Phosphomannomutase [Streptococcus thermophilus LMD-9]_hit-name:pgmA _hit-score:49_hit-evalue:2e-07_identity-percent:37.0967741935484	1	0	0	0	0	0	0	0	0	0	0	0	0	0	0	0	0	0	0	0	0	0	0	0	0	0	0	0	0	0	0	0	0	0	0	0	0	0	0	0	0	0	0	0	0
175	TENASAGVMISASHNPALDNGIK	S11:+79.96633	a8.a1	gi|116627995|ref|YP_820614.1|STER_1230|Phosphomannomutase [Streptococcus thermophilus LMD-9]_hit-name:pgmA _hit-score:49_hit-evalue:2e-07_identity-percent:37.0967741935484	2	0	1	0	1	0	0	0	0	0	0	0	0	0	0	0	0	0	0	0	1	2	1	0	0	0	0	0	0	0	0	0	1	1	0	0	1	0	0	0	0	0	0	0	0
176	TENASAGVMISASHNPALDNGIK	S13:+79.96633	a8.a1	gi|116627995|ref|YP_820614.1|STER_1230|Phosphomannomutase [Streptococcus thermophilus LMD-9]_hit-name:pgmA _hit-score:49_hit-evalue:2e-07_identity-percent:37.0967741935484	0	0	0	1	0	2	0	0	0	0	0	0	0	0	0	0	0	0	1	0	1	0	1	1	0	0	0	0	0	0	0	0	1	0	0	1	0	0	0	0	0	0	0	0	0
177	ARDNGYAVGGFNTNNLEWTQAILR	Y6:+79.96633	a9.a1	gi|116628570|ref|YP_821189.1|STER_1876|Fructose/tagatose bisphosphate aldolase [Streptococcus thermophilus LMD-9]_hit-name:tnp1191 _hit-score:_hit-evalue:1.2_identity-percent:29.1666666666667	0	0	0	0	0	0	0	0	1	1	0	0	0	0	0	0	0	1	1	0	1	0	0	1	0	0	0	0	0	1	0	0	0	0	0	0	0	0	0	0	0	0	0	0	0
178	ARDNGYAVGGFNTNNLEWTQAILR	T13:+79.96633	a9.a1	gi|116628570|ref|YP_821189.1|STER_1876|Fructose/tagatose bisphosphate aldolase [Streptococcus thermophilus LMD-9]_hit-name:tnp1191 _hit-score:_hit-evalue:1.2_identity-percent:29.1666666666667	0	0	0	0	0	0	0	0	0	0	0	0	0	0	0	0	0	0	0	0	0	0	0	0	0	0	0	1	0	0	0	0	0	1	0	0	0	0	0	0	0	1	0	0	0
179	NGYAVGGFNTNNLEWTQAILR	Y3:+79.96633 - N1:+42.01056	a9.a1	gi|116628570|ref|YP_821189.1|STER_1876|Fructose/tagatose bisphosphate aldolase [Streptococcus thermophilus LMD-9]_hit-name:tnp1191 _hit-score:_hit-evalue:1.2_identity-percent:29.1666666666667	0	0	0	0	0	0	0	0	0	1	0	0	0	0	0	0	0	0	0	0	0	0	0	0	1	0	0	1	0	0	0	0	0	0	0	0	0	0	0	0	0	1	0	0	0
180	NGYAVGGFNTNNLEWTQAILR	T10:+79.96633 - N1:+42.01056	a9.a1	gi|116628570|ref|YP_821189.1|STER_1876|Fructose/tagatose bisphosphate aldolase [Streptococcus thermophilus LMD-9]_hit-name:tnp1191 _hit-score:_hit-evalue:1.2_identity-percent:29.1666666666667	0	0	0	0	0	0	0	0	0	0	0	0	0	0	0	0	0	0	0	0	0	0	0	0	0	0	0	0	0	0	0	0	0	0	0	0	0	0	0	0	0	1	0	0	0
181	SAEKFVQAARDNGYAVGGFNTNNLEWTQAILR	S1:+79.96633 - S1:+42.01056	a9.a1	gi|116628570|ref|YP_821189.1|STER_1876|Fructose/tagatose bisphosphate aldolase [Streptococcus thermophilus LMD-9]_hit-name:tnp1191 _hit-score:_hit-evalue:1.2_identity-percent:29.1666666666667	0	0	0	0	0	0	0	0	0	0	0	0	0	0	0	0	0	0	0	0	0	1	0	0	0	0	0	0	0	0	0	0	0	0	0	1	0	0	0	0	0	0	0	0	0
182	SAEKFVQAARDNGYAVGGFNTNNLEWTQAILR	Y14:+79.96633 - S1:+42.01056	a9.a1	gi|116628570|ref|YP_821189.1|STER_1876|Fructose/tagatose bisphosphate aldolase [Streptococcus thermophilus LMD-9]_hit-name:tnp1191 _hit-score:_hit-evalue:1.2_identity-percent:29.1666666666667	0	0	0	0	0	0	0	0	0	0	0	0	0	0	0	0	0	0	1	0	0	0	0	0	0	0	0	0	0	0	0	0	0	0	0	0	0	0	0	0	0	0	0	0	0
183	AEKFVQAARDNGYAVGGFNTNNLEWTQAILR	T20:+79.96633 - Y13:+79.96633 - A1:+42.01056	a9.a1	gi|116628570|ref|YP_821189.1|STER_1876|Fructose/tagatose bisphosphate aldolase [Streptococcus thermophilus LMD-9]_hit-name:tnp1191 _hit-score:_hit-evalue:1.2_identity-percent:29.1666666666667	0	0	0	0	0	0	0	0	0	0	0	0	0	0	0	0	0	0	0	1	0	0	0	0	0	0	0	0	0	0	0	0	1	0	0	0	0	0	0	0	0	0	0	0	0
184	NGYAVGGFNTNNLEWTQAILR	Y3:+79.96633	a9.a1	gi|116628570|ref|YP_821189.1|STER_1876|Fructose/tagatose bisphosphate aldolase [Streptococcus thermophilus LMD-9]_hit-name:tnp1191 _hit-score:_hit-evalue:1.2_identity-percent:29.1666666666667	0	0	0	0	0	0	0	0	0	0	0	0	0	0	0	0	0	0	0	0	0	0	0	0	0	0	0	0	0	0	0	0	0	0	0	0	0	0	0	0	0	0	0	0	0
185	NGYAVGGFNTNNLEWTQAILR	T10:+79.96633	a9.a1	gi|116628570|ref|YP_821189.1|STER_1876|Fructose/tagatose bisphosphate aldolase [Streptococcus thermophilus LMD-9]_hit-name:tnp1191 _hit-score:_hit-evalue:1.2_identity-percent:29.1666666666667	0	0	0	0	0	0	0	0	0	0	0	0	0	0	0	0	0	0	0	0	0	0	0	0	1	0	0	0	0	0	0	0	0	0	0	0	0	0	0	0	0	0	0	0	0
186	EKFVQAARDNGYAVGGFNTNNLEWTQAILR	T19:+79.96633 - Y12:+79.96633 - E1:+42.01056	a9.a1	gi|116628570|ref|YP_821189.1|STER_1876|Fructose/tagatose bisphosphate aldolase [Streptococcus thermophilus LMD-9]_hit-name:tnp1191 _hit-score:_hit-evalue:1.2_identity-percent:29.1666666666667	0	0	0	0	0	0	0	0	0	0	0	0	0	0	0	0	0	0	0	0	0	0	0	0	0	0	0	0	0	0	0	0	0	0	0	0	0	0	0	0	0	0	0	0	0
187	VNVNTECQIAFANATR	C7:+57.02146 - T5:+79.96633	a9.a2	gi|116628570|ref|YP_821189.1|STER_1876|Fructose/tagatose bisphosphate aldolase [Streptococcus thermophilus LMD-9]_hit-name:tnp1191 _hit-score:_hit-evalue:1.2_identity-percent:29.1666666666667	1	0	1	1	0	0	0	0	0	0	0	0	0	0	0	0	0	0	0	1	0	0	1	0	0	0	0	0	0	0	0	0	0	0	1	0	0	0	0	0	0	0	0	0	0
188	LTEAVPGFPIVLHGGSGIPDDQIQEAIK	S16:+79.96633	a9.a3	gi|116628570|ref|YP_821189.1|STER_1876|Fructose/tagatose bisphosphate aldolase [Streptococcus thermophilus LMD-9]_hit-name:tnp1191 _hit-score:_hit-evalue:1.2_identity-percent:29.1666666666667	0	0	0	0	0	0	0	0	0	0	0	0	0	0	0	0	0	0	1	0	0	0	0	0	0	0	0	0	0	0	0	0	1	0	0	1	0	0	0	0	0	0	0	0	0
190	VQGAFFNSGQYQMIFGTGTVNK	T17:+79.96633	b10.a1	gi|116628430|ref|YP_821049.1|STER_1710|sucrose PTS, EIIBCA [Streptococcus thermophilus LMD-9]_hit-name:scrA _hit-score:1031_hit-evalue:0.0_identity-percent:85.4660347551343	1	0	1	1	0	0	0	0	0	0	0	0	0	0	0	0	0	0	1	1	0	1	1	1	0	0	0	0	0	0	0	0	0	0	0	1	0	1	0	0	0	0	0	0	0
191	VQGAFFNSGQYQMIFGTGTVNK	S8:+79.96633	b10.a1	gi|116628430|ref|YP_821049.1|STER_1710|sucrose PTS, EIIBCA [Streptococcus thermophilus LMD-9]_hit-name:scrA _hit-score:1031_hit-evalue:0.0_identity-percent:85.4660347551343	0	1	2	0	0	0	1	0	0	0	0	0	0	0	0	0	0	0	1	0	1	1	1	1	1	0	0	0	0	0	0	0	1	2	2	0	2	1	0	0	0	0	0	0	0
192	VQGAFFNSGQYQMIFGTGTVNK	Y11:+79.96633	b10.a1	gi|116628430|ref|YP_821049.1|STER_1710|sucrose PTS, EIIBCA [Streptococcus thermophilus LMD-9]_hit-name:scrA _hit-score:1031_hit-evalue:0.0_identity-percent:85.4660347551343	0	0	0	0	0	0	1	0	0	0	0	0	0	0	0	0	0	0	0	0	0	0	0	0	0	0	0	0	0	0	0	0	0	0	0	0	0	0	0	0	0	0	0	0	0
189	VQGAFFNSGQYQMIFGTGTVNK	M13:+15.99491 - S8:+79.96633	b10.a1	gi|116628430|ref|YP_821049.1|STER_1710|sucrose PTS, EIIBCA [Streptococcus thermophilus LMD-9]_hit-name:scrA _hit-score:1031_hit-evalue:0.0_identity-percent:85.4660347551343	1	0	1	1	0	0	0	0	0	0	0	0	0	0	0	0	0	0	0	0	0	0	0	0	0	0	0	0	0	0	0	0	0	0	0	0	0	0	0	0	0	0	0	0	0
193	PLNAIITAAMTAQAGATLAVGVK	M10:+15.99491 - T17:+79.96633	b10.a2	gi|116628430|ref|YP_821049.1|STER_1710|sucrose PTS, EIIBCA [Streptococcus thermophilus LMD-9]_hit-name:scrA _hit-score:1031_hit-evalue:0.0_identity-percent:85.4660347551343	0	0	0	0	0	0	0	0	0	0	0	0	0	0	0	0	0	0	0	0	1	0	0	0	0	0	0	0	0	0	0	0	0	0	0	0	0	0	0	0	0	0	0	0	0
194	TASGFVLAGASHETTK	S11:+79.96633	b11.a1	gi|116627145|ref|YP_819764.1|STER_0252|groES|Co-chaperonin GroES (HSP10) [Streptococcus thermophilus LMD-9]_hit-name:groES _hit-score:181_hit-evalue:2e-48_identity-percent:100	2	2	0	1	1	0	0	0	0	0	0	0	0	0	0	0	0	0	2	2	0	0	1	0	0	0	0	0	0	0	0	0	1	1	0	0	1	0	0	0	0	0	0	0	0
195	TASGFVLAGASHETTK	S3:+79.96633	b11.a1	gi|116627145|ref|YP_819764.1|STER_0252|groES|Co-chaperonin GroES (HSP10) [Streptococcus thermophilus LMD-9]_hit-name:groES _hit-score:181_hit-evalue:2e-48_identity-percent:100	0	1	1	1	1	1	0	0	0	0	0	0	0	0	0	0	0	0	0	1	0	0	1	1	0	0	0	0	0	0	0	0	0	1	1	0	0	1	0	0	0	0	0	0	0
196	TASGFVLAGASHETTK	T14:+79.96633	b11.a1	gi|116627145|ref|YP_819764.1|STER_0252|groES|Co-chaperonin GroES (HSP10) [Streptococcus thermophilus LMD-9]_hit-name:groES _hit-score:181_hit-evalue:2e-48_identity-percent:100	0	0	0	0	0	0	0	0	0	0	0	0	0	0	0	0	0	0	0	0	0	0	1	0	0	0	0	0	0	0	0	0	0	0	0	0	0	0	0	0	0	0	0	0	0
197	GASHETTKTAEVLAVGEGTR	T6:+79.96633	b11.a1	gi|116627145|ref|YP_819764.1|STER_0252|groES|Co-chaperonin GroES (HSP10) [Streptococcus thermophilus LMD-9]_hit-name:groES _hit-score:181_hit-evalue:2e-48_identity-percent:100	0	0	0	0	0	0	0	0	0	0	0	0	0	0	0	0	0	0	0	0	1	0	0	0	0	0	0	0	0	0	0	0	0	0	0	0	0	0	0	0	0	0	0	0	0
198	TLTGELIAPSVAVGDK	S10:+79.96633	b11.a2	gi|116627145|ref|YP_819764.1|STER_0252|groES|Co-chaperonin GroES (HSP10) [Streptococcus thermophilus LMD-9]_hit-name:groES _hit-score:181_hit-evalue:2e-48_identity-percent:100	0	1	0	0	0	0	0	0	0	0	0	0	0	0	0	0	0	0	1	0	0	0	0	0	0	0	0	0	0	0	0	0	0	0	0	0	0	0	0	0	0	0	0	0	0
199	DYASIDAAPEER	S4:+79.96633	b12.a1	gi|116627379|ref|YP_819998.1|STER_0524|GTPase - translation elongation factor [Streptococcus thermophilus LMD-9]_hit-name:tuf _hit-score:726_hit-evalue:0.0_identity-percent:92.713567839196	1	1	0	0	0	0	1	1	1	0	1	1	0	0	0	0	0	0	1	0	0	1	0	0	0	0	0	0	1	1	0	0	0	0	0	0	0	0	0	0	0	0	1	0	0
200	DYASIDAAPEER	Y2:+79.96633	b12.a1	gi|116627379|ref|YP_819998.1|STER_0524|GTPase - translation elongation factor [Streptococcus thermophilus LMD-9]_hit-name:tuf _hit-score:726_hit-evalue:0.0_identity-percent:92.713567839196	0	0	0	0	0	0	0	0	0	0	0	0	0	0	0	0	0	0	0	0	0	0	0	0	0	0	0	0	0	0	0	0	0	0	0	0	0	0	0	0	0	0	0	0	0
201	VNTPKDYASIDAAPEER	T3:+79.96633 - Y7:+79.96633	b12.a1	gi|116627379|ref|YP_819998.1|STER_0524|GTPase - translation elongation factor [Streptococcus thermophilus LMD-9]_hit-name:tuf _hit-score:726_hit-evalue:0.0_identity-percent:92.713567839196	0	0	0	0	0	0	0	0	0	0	0	0	0	1	0	0	0	0	0	0	0	0	0	0	0	0	0	0	0	0	0	0	0	0	0	0	0	0	0	0	0	0	0	0	0
203	DLLSEYDFPGDDIPVIQGSALK	S19:+79.96633	b12.a2	gi|116627379|ref|YP_819998.1|STER_0524|GTPase - translation elongation factor [Streptococcus thermophilus LMD-9]_hit-name:tuf _hit-score:726_hit-evalue:0.0_identity-percent:92.713567839196	0	0	0	0	0	0	0	0	0	0	0	0	0	0	0	0	0	0	0	1	0	0	0	0	0	0	0	0	0	0	0	0	0	0	0	0	0	1	0	0	0	0	0	0	0
202	DLLSEYDFPGDDIPVIQGSALK	Y6:+79.96633	b12.a2	gi|116627379|ref|YP_819998.1|STER_0524|GTPase - translation elongation factor [Streptococcus thermophilus LMD-9]_hit-name:tuf _hit-score:726_hit-evalue:0.0_identity-percent:92.713567839196	0	1	0	1	1	0	0	0	0	0	0	0	0	0	0	0	0	0	0	0	1	1	0	0	0	0	0	0	0	0	0	0	0	2	0	0	2	0	0	0	0	0	0	0	0
204	DTDKPLLLPVEDVFSITGR	T17:+79.96633	b12.a3	gi|116627379|ref|YP_819998.1|STER_0524|GTPase - translation elongation factor [Streptococcus thermophilus LMD-9]_hit-name:tuf _hit-score:726_hit-evalue:0.0_identity-percent:92.713567839196	1	0	0	0	0	0	0	0	0	0	0	0	0	0	0	0	0	0	0	0	0	0	0	0	0	0	0	0	0	0	0	0	0	0	0	0	0	0	0	0	0	0	0	0	0
205	DTDKPLLLPVEDVFSITGR	S15:+79.96633	b12.a3	gi|116627379|ref|YP_819998.1|STER_0524|GTPase - translation elongation factor [Streptococcus thermophilus LMD-9]_hit-name:tuf _hit-score:726_hit-evalue:0.0_identity-percent:92.713567839196	0	0	0	1	0	0	0	0	0	0	0	0	0	0	0	0	0	0	0	0	0	0	0	0	0	0	0	0	0	0	0	0	0	0	0	0	0	0	0	0	0	0	0	0	0
206	GITINTAHVEYETEK	T3:+79.96633	b12.a4	gi|116627379|ref|YP_819998.1|STER_0524|GTPase - translation elongation factor [Streptococcus thermophilus LMD-9]_hit-name:tuf _hit-score:726_hit-evalue:0.0_identity-percent:92.713567839196	0	1	0	0	0	0	0	0	0	0	0	0	0	0	0	0	0	0	0	0	0	0	0	0	0	0	0	0	0	0	0	0	0	0	0	0	0	0	0	0	0	0	0	0	0
207	VDHGKTTLTAAITTVLAR	T6:+79.96633 - V1:+42.01056	b12.a5	gi|116627379|ref|YP_819998.1|STER_0524|GTPase - translation elongation factor [Streptococcus thermophilus LMD-9]_hit-name:tuf _hit-score:726_hit-evalue:0.0_identity-percent:92.713567839196	0	0	0	0	0	0	0	0	0	0	0	0	0	0	0	0	0	0	0	0	0	0	0	0	0	0	0	0	0	0	0	0	0	0	0	0	0	0	0	0	0	0	0	0	0
208	SKITTSLLQEMVQAAATR	T4:+79.96633	b13.a1	gi|116628556|ref|YP_821175.1|STER_1854|Predicted kinase related to dihydroxyacetone kinase [Streptococcus thermophilus LMD-9]_hit-name:rpoC _hit-score:30_hit-evalue:0.10_identity-percent:19.8412698412698	0	0	0	0	0	0	0	0	0	0	0	0	0	0	0	0	0	0	0	0	1	0	0	0	0	0	0	0	0	0	0	0	0	0	0	0	0	0	0	0	0	0	0	0	0
209	SKITTSLLQEMVQAAATR	T5:+79.96633	b13.a1	gi|116628556|ref|YP_821175.1|STER_1854|Predicted kinase related to dihydroxyacetone kinase [Streptococcus thermophilus LMD-9]_hit-name:rpoC _hit-score:30_hit-evalue:0.10_identity-percent:19.8412698412698	0	0	0	0	0	0	0	0	0	0	0	0	0	0	0	0	0	0	0	0	0	0	0	1	0	0	0	0	0	0	0	0	0	0	0	1	0	1	0	0	0	0	0	0	0
210	SKITTSLLQEMVQAAATR	S6:+79.96633	b13.a1	gi|116628556|ref|YP_821175.1|STER_1854|Predicted kinase related to dihydroxyacetone kinase [Streptococcus thermophilus LMD-9]_hit-name:rpoC _hit-score:30_hit-evalue:0.10_identity-percent:19.8412698412698	0	0	0	0	0	1	0	0	0	0	0	0	0	0	0	0	0	0	0	0	0	1	0	0	0	0	0	0	0	0	0	0	0	0	0	0	0	0	0	0	0	0	0	0	0
211	SKITTSLLQEMVQAAATR	S1:+79.96633	b13.a1	gi|116628556|ref|YP_821175.1|STER_1854|Predicted kinase related to dihydroxyacetone kinase [Streptococcus thermophilus LMD-9]_hit-name:rpoC _hit-score:30_hit-evalue:0.10_identity-percent:19.8412698412698	0	0	1	0	0	0	0	0	0	0	0	0	0	0	0	0	0	0	0	0	0	0	0	0	0	0	0	0	0	0	0	0	0	1	1	0	0	0	0	0	0	0	0	0	0
212	ITTSLLQEMVQAAATR	S4:+79.96633	b13.a1	gi|116628556|ref|YP_821175.1|STER_1854|Predicted kinase related to dihydroxyacetone kinase [Streptococcus thermophilus LMD-9]_hit-name:rpoC _hit-score:30_hit-evalue:0.10_identity-percent:19.8412698412698	1	0	0	0	0	0	0	0	0	0	0	0	0	0	0	0	0	0	1	1	0	0	1	0	0	0	0	0	0	0	0	0	1	0	1	1	0	1	0	0	0	0	0	0	0
213	ITTSLLQEMVQAAATR	T3:+79.96633	b13.a1	gi|116628556|ref|YP_821175.1|STER_1854|Predicted kinase related to dihydroxyacetone kinase [Streptococcus thermophilus LMD-9]_hit-name:rpoC _hit-score:30_hit-evalue:0.10_identity-percent:19.8412698412698	0	1	0	1	1	0	0	0	0	0	0	0	0	0	0	0	0	0	0	0	0	0	0	1	0	0	0	0	0	0	0	0	0	0	0	0	0	0	0	0	0	0	0	0	0
214	ITTSLLQEMVQAAATR	T2:+79.96633	b13.a1	gi|116628556|ref|YP_821175.1|STER_1854|Predicted kinase related to dihydroxyacetone kinase [Streptococcus thermophilus LMD-9]_hit-name:rpoC _hit-score:30_hit-evalue:0.10_identity-percent:19.8412698412698	0	0	0	1	0	0	0	0	0	0	0	0	0	0	0	0	0	0	0	0	0	0	0	0	0	0	0	0	0	0	0	0	0	0	0	0	0	0	0	0	0	0	0	0	0
215	SGETEDSTIADIAVATNAGQIK	T8:+79.96633	b14.a1	gi|116627519|ref|YP_820138.1|STER_0684|eno|Enolase [Streptococcus thermophilus LMD-9]_hit-name:eno _hit-score:853_hit-evalue:0.0_identity-percent:99.5391705069124	0	0	0	1	0	0	0	0	0	0	0	0	0	0	0	0	0	0	0	0	0	1	0	1	0	0	0	0	0	0	0	0	0	0	0	0	0	1	0	0	0	0	0	0	0
216	SGETEDSTIADIAVATNAGQIK	S1:+79.96633	b14.a1	gi|116627519|ref|YP_820138.1|STER_0684|eno|Enolase [Streptococcus thermophilus LMD-9]_hit-name:eno _hit-score:853_hit-evalue:0.0_identity-percent:99.5391705069124	0	0	0	0	0	0	0	0	0	0	0	0	0	0	0	0	0	0	0	0	0	0	0	1	0	0	0	0	0	0	0	0	0	1	0	0	0	0	0	0	0	0	0	0	0
217	SGETEDSTIADIAVATNAGQIK	S7:+79.96633	b14.a1	gi|116627519|ref|YP_820138.1|STER_0684|eno|Enolase [Streptococcus thermophilus LMD-9]_hit-name:eno _hit-score:853_hit-evalue:0.0_identity-percent:99.5391705069124	0	0	0	0	0	1	0	0	0	0	0	0	0	0	0	0	0	0	0	0	0	0	0	0	0	0	0	0	0	0	0	0	0	0	1	0	0	0	0	0	0	0	0	0	0
218	SGETEDSTIADIAVATNAGQIK	T4:+79.96633	b14.a1	gi|116627519|ref|YP_820138.1|STER_0684|eno|Enolase [Streptococcus thermophilus LMD-9]_hit-name:eno _hit-score:853_hit-evalue:0.0_identity-percent:99.5391705069124	0	0	0	0	0	1	0	0	0	0	0	0	0	0	0	0	0	0	0	0	0	0	0	0	0	0	0	0	0	0	0	0	0	1	0	0	0	0	0	0	0	0	0	0	0
219	EAGYTAVVSHRSGETEDSTIADIAVATNAGQIK	S12:+79.96633	b14.a1	gi|116627519|ref|YP_820138.1|STER_0684|eno|Enolase [Streptococcus thermophilus LMD-9]_hit-name:eno _hit-score:853_hit-evalue:0.0_identity-percent:99.5391705069124	0	0	0	0	0	0	0	0	0	0	0	0	0	0	0	0	0	0	0	0	0	0	0	0	0	0	0	0	0	0	0	0	0	0	0	0	0	0	0	0	0	0	0	0	0
220	MSIITDVYAR	M1:+15.99491 - S2:+79.96633	b14.a2	gi|116627519|ref|YP_820138.1|STER_0684|eno|Enolase [Streptococcus thermophilus LMD-9]_hit-name:eno _hit-score:853_hit-evalue:0.0_identity-percent:99.5391705069124	1	0	0	1	0	0	1	0	0	1	0	0	0	0	0	0	0	0	1	0	0	0	0	0	0	0	0	0	0	0	0	0	1	0	0	0	0	0	0	0	0	0	0	0	0
221	GMVPSGASTGEHEAVELR	S5:+79.96633	b14.a3	gi|116627519|ref|YP_820138.1|STER_0684|eno|Enolase [Streptococcus thermophilus LMD-9]_hit-name:eno _hit-score:853_hit-evalue:0.0_identity-percent:99.5391705069124	1	0	0	0	0	0	0	0	0	0	0	0	0	0	0	0	0	0	1	0	0	0	0	0	0	0	0	0	0	0	0	0	0	0	0	0	1	0	0	0	0	0	0	0	0
222	GMVPSGASTGEHEAVELR	T9:+79.96633	b14.a3	gi|116627519|ref|YP_820138.1|STER_0684|eno|Enolase [Streptococcus thermophilus LMD-9]_hit-name:eno _hit-score:853_hit-evalue:0.0_identity-percent:99.5391705069124	0	0	1	0	0	0	0	0	0	0	0	0	0	0	0	0	0	0	0	0	0	0	0	0	0	0	0	0	0	0	0	0	0	0	0	0	0	0	0	0	0	0	0	0	0
223	GMVPSGASTGEHEAVELR	S8:+79.96633	b14.a3	gi|116627519|ref|YP_820138.1|STER_0684|eno|Enolase [Streptococcus thermophilus LMD-9]_hit-name:eno _hit-score:853_hit-evalue:0.0_identity-percent:99.5391705069124	0	1	0	0	0	0	0	0	0	0	0	0	0	0	0	0	0	0	0	0	0	0	0	0	0	0	0	0	0	0	0	0	0	0	0	0	0	0	0	0	0	0	0	0	0
224	YATSVDLDGK	T3:+79.96633	b15.a1	gi|116628669|ref|YP_821288.1|STER_1987|Uncharacterized conserved protein containing XRE-family DNA-binding domain [Streptococcus thermophilus LMD-9]_hit-name:purH _hit-score:25_hit-evalue:1.1_identity-percent:38.8888888888889	1	0	1	1	0	0	0	0	1	0	0	1	0	0	0	0	0	0	0	1	1	0	0	0	0	1	1	0	1	1	0	0	1	0	1	1	0	1	1	0	0	1	0	0	0
225	YATSVDLDGK	Y1:+79.96633	b15.a1	gi|116628669|ref|YP_821288.1|STER_1987|Uncharacterized conserved protein containing XRE-family DNA-binding domain [Streptococcus thermophilus LMD-9]_hit-name:purH _hit-score:25_hit-evalue:1.1_identity-percent:38.8888888888889	0	0	0	0	0	0	1	0	0	1	0	0	0	0	0	0	0	0	0	0	0	0	0	0	0	0	0	0	0	0	0	0	0	0	0	0	0	0	0	0	0	0	0	0	0
226	DIQQEALEKYATSVDLDGK	Y10:+79.96633	b15.a1	gi|116628669|ref|YP_821288.1|STER_1987|Uncharacterized conserved protein containing XRE-family DNA-binding domain [Streptococcus thermophilus LMD-9]_hit-name:purH _hit-score:25_hit-evalue:1.1_identity-percent:38.8888888888889	0	0	0	0	0	1	0	0	0	0	0	0	0	0	0	0	0	0	0	0	0	0	0	0	0	0	0	0	0	0	0	0	0	0	0	0	0	0	0	0	0	0	0	0	0
227	DIQQEALEKYATSVDLDGK	T12:+79.96633	b15.a1	gi|116628669|ref|YP_821288.1|STER_1987|Uncharacterized conserved protein containing XRE-family DNA-binding domain [Streptococcus thermophilus LMD-9]_hit-name:purH _hit-score:25_hit-evalue:1.1_identity-percent:38.8888888888889	0	0	0	0	0	0	0	0	0	0	0	0	0	0	0	0	0	0	0	0	0	0	0	0	0	0	0	0	0	0	0	0	1	0	0	0	0	0	0	0	0	0	0	0	0
228	KEDILDTKVPMSR	T7:+79.96633	b15.a2	gi|116628669|ref|YP_821288.1|STER_1987|Uncharacterized conserved protein containing XRE-family DNA-binding domain [Streptococcus thermophilus LMD-9]_hit-name:purH _hit-score:25_hit-evalue:1.1_identity-percent:38.8888888888889	1	0	0	1	0	0	0	0	0	0	0	0	0	0	0	0	0	0	0	1	0	0	0	0	0	0	0	0	0	0	0	0	0	0	0	0	0	0	0	0	0	0	0	0	0
229	GFTDETVR	T6:+79.96633	b16.a1	gi|116628624|ref|YP_821243.1|STER_1937|hypothetical protein STER_1937 [Streptococcus thermophilus LMD-9]_hit-name:citB _hit-score:27_hit-evalue:0.044_identity-percent:29.6296296296296	1	0	1	0	0	0	1	0	1	1	0	1	0	0	0	0	0	0	0	1	0	0	0	0	0	1	0	0	0	0	0	0	1	0	0	0	0	0	1	0	0	1	0	0	0
230	GFTDETVRFNLNDGDK	T6:+79.96633	b16.a1	gi|116628624|ref|YP_821243.1|STER_1937|hypothetical protein STER_1937 [Streptococcus thermophilus LMD-9]_hit-name:citB _hit-score:27_hit-evalue:0.044_identity-percent:29.6296296296296	1	0	0	1	0	0	0	0	0	0	0	0	0	0	0	0	0	0	0	2	0	0	1	0	0	0	0	0	0	0	0	0	0	0	0	0	0	0	0	0	0	0	0	0	0
231	FTDETVRFNLNDGDKNEISNTLTNVYR	T2:+79.96633 - T5:+79.96633	b16.a1	gi|116628624|ref|YP_821243.1|STER_1937|hypothetical protein STER_1937 [Streptococcus thermophilus LMD-9]_hit-name:citB _hit-score:27_hit-evalue:0.044_identity-percent:29.6296296296296	1	0	0	1	0	0	0	0	0	0	0	0	0	0	0	0	0	0	0	0	0	0	0	0	0	0	0	0	0	0	0	0	0	0	0	0	0	0	0	0	0	0	0	0	0
232	GFTDETVRFNLNDGDKNEISNTLTNVYR	T6:+79.96633	b16.a1	gi|116628624|ref|YP_821243.1|STER_1937|hypothetical protein STER_1937 [Streptococcus thermophilus LMD-9]_hit-name:citB _hit-score:27_hit-evalue:0.044_identity-percent:29.6296296296296	0	0	0	1	0	0	0	0	0	0	0	0	0	0	0	0	0	0	0	0	0	0	0	0	0	0	0	0	0	0	0	0	0	0	0	1	0	0	0	0	0	0	0	0	0
233	GFTDETVRFNLNDGDKNEISNTLTNVYR	T3:+79.96633	b16.a1	gi|116628624|ref|YP_821243.1|STER_1937|hypothetical protein STER_1937 [Streptococcus thermophilus LMD-9]_hit-name:citB _hit-score:27_hit-evalue:0.044_identity-percent:29.6296296296296	0	0	0	0	0	0	0	0	0	0	0	0	0	0	0	0	0	0	0	0	0	0	0	0	0	0	0	0	0	0	0	0	1	0	0	0	0	0	0	0	0	0	0	0	0
234	GFTDETVRFNLNDGDKNEISNTLTNVYR	T6:+79.96633 - G1:+42.01057	b16.a1	gi|116628624|ref|YP_821243.1|STER_1937|hypothetical protein STER_1937 [Streptococcus thermophilus LMD-9]_hit-name:citB _hit-score:27_hit-evalue:0.044_identity-percent:29.6296296296296	0	0	0	0	0	0	0	0	0	0	0	0	0	0	0	0	0	0	0	0	0	0	1	0	0	0	0	0	0	0	0	0	0	0	0	0	0	0	0	0	0	0	0	0	0
235	DFHIVAETGIHAR	T8:+79.96633	b17.a1	gi|116628008|ref|YP_820627.1|STER_1243|Phosphotransferase system, HPr-related protein [Streptococcus thermophilus LMD-9]_hit-name:ptsH _hit-score:146_hit-evalue:7e-38_identity-percent:88.5057471264368	2	2	0	1	2	0	0	0	0	0	0	0	0	0	0	0	0	0	2	0	0	1	2	0	0	0	0	0	0	0	0	0	3	0	0	2	0	1	0	0	0	0	0	0	0
236	SIMGVMSLGVGQGADVTISAEGPDADDAIAAIAETMTK	T17:+79.96633	b17.a2	gi|116628008|ref|YP_820627.1|STER_1243|Phosphotransferase system, HPr-related protein [Streptococcus thermophilus LMD-9]_hit-name:ptsH _hit-score:146_hit-evalue:7e-38_identity-percent:88.5057471264368	0	0	0	1	0	0	0	0	0	0	0	0	0	0	0	0	0	0	0	0	0	0	0	0	0	0	0	0	0	0	0	0	0	0	0	0	0	0	0	0	0	0	0	0	0
237	AVNLKSIMGVM	S6:+79.96633	b17.a2	gi|116628008|ref|YP_820627.1|STER_1243|Phosphotransferase system, HPr-related protein [Streptococcus thermophilus LMD-9]_hit-name:ptsH _hit-score:146_hit-evalue:7e-38_identity-percent:88.5057471264368	0	0	0	0	0	0	0	0	0	0	0	0	0	0	0	0	0	0	0	0	1	0	0	0	0	0	0	0	0	0	0	0	0	0	0	0	0	0	0	0	0	0	0	0	0
238	AVNLKSIMGVMSLGVGQGADVTISAEGPDADDAIAAIAETMTK	S6:+79.96633	b17.a2	gi|116628008|ref|YP_820627.1|STER_1243|Phosphotransferase system, HPr-related protein [Streptococcus thermophilus LMD-9]_hit-name:ptsH _hit-score:146_hit-evalue:7e-38_identity-percent:88.5057471264368	0	0	0	0	0	0	0	0	0	0	0	0	0	0	0	0	0	0	0	0	0	0	0	0	0	0	0	0	0	1	0	0	0	0	0	0	0	0	0	0	0	0	0	0	0
239	FASDITLEYK	S3:+79.96633	b17.a3	gi|116628008|ref|YP_820627.1|STER_1243|Phosphotransferase system, HPr-related protein [Streptococcus thermophilus LMD-9]_hit-name:ptsH _hit-score:146_hit-evalue:7e-38_identity-percent:88.5057471264368	0	0	0	0	0	0	0	0	0	0	0	0	0	0	0	0	0	0	0	0	0	0	0	0	0	0	0	0	0	0	0	0	0	0	0	0	0	0	0	0	0	0	0	0	0
240	EASILELNDLVK	S3:+79.96633	b18.a1	gi|116627418|ref|YP_820037.1|STER_0568|rplL|Ribosomal protein L7/L12 [Streptococcus thermophilus LMD-9]_hit-name:rplL _hit-score:125_hit-evalue:2e-31_identity-percent:68.5714285714286	1	1	0	0	1	0	0	0	0	0	0	0	0	0	0	0	0	0	0	1	0	1	0	0	0	0	0	0	0	0	0	0	0	1	0	0	1	0	0	0	0	0	0	0	0
243	AIVDGAPSVIKEGVSAAEAEEIK	S8:+79.96633	b18.a2	gi|116627418|ref|YP_820037.1|STER_0568|rplL|Ribosomal protein L7/L12 [Streptococcus thermophilus LMD-9]_hit-name:rplL _hit-score:125_hit-evalue:2e-31_identity-percent:68.5714285714286	0	0	0	0	0	0	0	0	0	0	0	0	0	0	0	0	0	0	0	0	1	0	0	0	0	0	0	0	0	0	0	0	0	0	0	0	0	0	0	0	0	0	0	0	0
241	EGVSAAEAEEIK	S4:+79.96633	b18.a2	gi|116627418|ref|YP_820037.1|STER_0568|rplL|Ribosomal protein L7/L12 [Streptococcus thermophilus LMD-9]_hit-name:rplL _hit-score:125_hit-evalue:2e-31_identity-percent:68.5714285714286	1	0	0	1	0	0	0	0	0	0	0	0	0	0	0	0	0	0	1	0	0	1	0	0	0	0	0	0	0	0	0	0	0	0	0	0	0	0	0	0	0	0	0	0	0
242	AIVDGAPSVIK	S8:+79.96633	b18.a2	gi|116627418|ref|YP_820037.1|STER_0568|rplL|Ribosomal protein L7/L12 [Streptococcus thermophilus LMD-9]_hit-name:rplL _hit-score:125_hit-evalue:2e-31_identity-percent:68.5714285714286	0	1	0	0	0	0	0	0	0	0	0	0	0	0	0	0	0	0	0	0	0	0	0	0	0	0	0	0	0	0	0	0	0	0	0	0	0	0	0	0	0	0	0	0	0
244	DSFDVELTSAGDK	T8:+79.96633	b18.a3	gi|116627418|ref|YP_820037.1|STER_0568|rplL|Ribosomal protein L7/L12 [Streptococcus thermophilus LMD-9]_hit-name:rplL _hit-score:125_hit-evalue:2e-31_identity-percent:68.5714285714286	1	0	0	0	0	0	0	0	0	0	0	0	0	0	0	0	0	0	1	0	0	0	0	0	0	0	0	0	0	0	0	0	0	0	0	0	0	0	0	0	0	0	0	0	0
245	DSFDVELTSAGDK	S9:+79.96633	b18.a3	gi|116627418|ref|YP_820037.1|STER_0568|rplL|Ribosomal protein L7/L12 [Streptococcus thermophilus LMD-9]_hit-name:rplL _hit-score:125_hit-evalue:2e-31_identity-percent:68.5714285714286	0	1	0	0	0	0	0	0	0	0	0	0	0	0	0	0	0	0	0	0	0	0	0	0	0	0	0	0	0	0	0	0	0	0	0	0	0	0	0	0	0	0	0	0	0
246	DSFDVELTSAGDK	S2:+79.96633	b18.a3	gi|116627418|ref|YP_820037.1|STER_0568|rplL|Ribosomal protein L7/L12 [Streptococcus thermophilus LMD-9]_hit-name:rplL _hit-score:125_hit-evalue:2e-31_identity-percent:68.5714285714286	0	0	0	0	1	0	0	0	0	0	0	0	0	0	0	0	0	0	0	0	0	0	0	0	0	0	0	0	0	0	0	0	0	0	0	0	0	0	0	0	0	0	0	0	0
247	VTPQPNRIPVENTVEVPQPVDGENHEQK	T13:+79.96633	b19.a1	gi|116627604|ref|YP_820223.1|STER_0776|Actin-like ATPase involved in cell division [Streptococcus thermophilus LMD-9]_hit-name:ftsA _hit-score:850_hit-evalue:0.0_identity-percent:96.5065502183406	0	0	1	0	0	0	0	0	0	0	0	0	0	0	0	0	0	0	0	1	1	0	1	0	0	0	0	0	0	0	0	0	0	0	0	1	0	0	0	0	0	0	0	0	0
248	IPVENTVEVPQPVDGENHEQK	T6:+79.96633	b19.a1	gi|116627604|ref|YP_820223.1|STER_0776|Actin-like ATPase involved in cell division [Streptococcus thermophilus LMD-9]_hit-name:ftsA _hit-score:850_hit-evalue:0.0_identity-percent:96.5065502183406	1	0	1	1	0	0	0	0	0	0	0	0	0	0	0	0	0	0	0	1	1	0	1	1	0	0	0	0	0	0	0	0	1	0	1	0	0	0	0	0	0	0	0	0	0
249	QLINDYEETHASTIAVMPVSSEEVSAYGVIAPQGK	S20:+79.96633	b20.a1	gi|116628515|ref|YP_821134.1|STER_1810|UDP-glucose pyrophosphorylase [Streptococcus thermophilus LMD-9]_hit-name:galU _hit-score:595_hit-evalue:1e-172_identity-percent:98.3552631578947	0	0	0	0	1	1	0	0	0	0	0	0	0	0	0	0	0	0	0	0	0	0	1	2	0	0	0	0	0	0	0	0	0	0	0	0	1	1	0	0	0	0	0	0	0
250	QLINDYEETHASTIAVMPVSSEEVSAYGVIAPQGK	S21:+79.96633	b20.a1	gi|116628515|ref|YP_821134.1|STER_1810|UDP-glucose pyrophosphorylase [Streptococcus thermophilus LMD-9]_hit-name:galU _hit-score:595_hit-evalue:1e-172_identity-percent:98.3552631578947	0	1	0	1	0	0	0	0	0	0	0	0	0	0	0	0	0	0	0	0	0	1	0	0	0	0	0	0	0	0	0	0	1	1	0	1	0	0	0	0	0	0	0	0	0
251	QLINDYEETHASTIAVMPVSSEEVSAYGVIAPQGK	M17:+15.99491 - S20:+79.96633	b20.a1	gi|116628515|ref|YP_821134.1|STER_1810|UDP-glucose pyrophosphorylase [Streptococcus thermophilus LMD-9]_hit-name:galU _hit-score:595_hit-evalue:1e-172_identity-percent:98.3552631578947	0	0	0	1	0	0	0	0	0	0	0	0	0	0	0	0	0	0	0	0	0	0	0	0	0	0	0	0	0	0	0	0	0	0	0	0	0	0	0	0	0	0	0	0	0
252	QLINDYEETHASTIAVMPVSSEEVSAYGVIAPQGK	M17:+15.99491 - S20:+79.96633 - Q1:-17.02655	b20.a1	gi|116628515|ref|YP_821134.1|STER_1810|UDP-glucose pyrophosphorylase [Streptococcus thermophilus LMD-9]_hit-name:galU _hit-score:595_hit-evalue:1e-172_identity-percent:98.3552631578947	0	0	0	0	0	0	0	0	0	0	0	0	0	0	0	0	0	0	1	0	0	0	0	0	0	0	0	0	0	0	0	0	0	0	0	0	0	0	0	0	0	0	0	0	0
253	NPQTGETISIAASK	S9:+79.96633	b21.a1	gi|116627943|ref|YP_820562.1|STER_1175|nucleoid DNA-binding protein [Streptococcus thermophilus LMD-9]_hit-name:hstH _hit-score:142_hit-evalue:7e-37_identity-percent:84.6153846153846	1	0	1	1	1	0	0	0	0	0	0	0	0	0	0	0	0	0	1	1	1	0	1	1	0	0	0	0	0	0	0	0	1	1	1	0	1	1	0	0	0	0	0	0	0
254	NLSIPQETEILK	T8:+79.96633	b22.a1	gi|116627174|ref|YP_819793.1|STER_0288|Predicted periplasmic solute-binding protein [Streptococcus thermophilus LMD-9]_hit-name:pabC _hit-score:1149_hit-evalue:0.0_identity-percent:91.1854103343465	1	0	1	0	0	1	0	0	0	0	0	0	0	0	0	0	0	0	0	1	0	0	1	1	0	0	0	0	0	0	0	0	1	0	1	0	0	0	0	0	0	0	0	0	0
255	HNEYSESAEDSLSFK	S11:+79.96633	b22.a2	gi|116627174|ref|YP_819793.1|STER_0288|Predicted periplasmic solute-binding protein [Streptococcus thermophilus LMD-9]_hit-name:pabC _hit-score:1149_hit-evalue:0.0_identity-percent:91.1854103343465	2	0	0	0	0	0	0	0	0	0	0	0	0	0	0	0	0	0	0	1	0	0	0	0	0	0	0	0	0	0	0	0	0	0	0	0	0	0	0	0	0	0	0	0	0
256	EAIYTNPK	Y4:+79.96633	b22.a3	gi|116627174|ref|YP_819793.1|STER_0288|Predicted periplasmic solute-binding protein [Streptococcus thermophilus LMD-9]_hit-name:pabC _hit-score:1149_hit-evalue:0.0_identity-percent:91.1854103343465	0	0	0	0	0	0	0	0	0	0	0	0	0	0	0	0	0	0	0	1	0	0	1	0	0	0	0	0	0	0	0	0	0	0	0	0	0	0	0	0	0	0	0	0	0
257	LANDEESIMAFVQAMK	S7:+79.96633	b23.a1	gi|116627321|ref|YP_819940.1|STER_0461|tRNA nucleotidyltransferase/poly(A) polymerase [Streptococcus thermophilus LMD-9]_hit-name:papL _hit-score:787_hit-evalue:0.0_identity-percent:99.2537313432836	1	1	1	1	1	1	0	0	0	0	0	0	0	0	0	0	0	0	1	0	1	1	1	0	0	0	0	0	0	0	0	0	1	0	1	0	1	1	0	0	0	0	0	0	0
258	KDTSDSSSNQSTVVIK	S4:+79.96633 - T3:+79.96633	b24.a1	gi|116627311|ref|YP_819930.1|STER_0449|hypothetical protein STER_0449 [Streptococcus thermophilus LMD-9]_hit-name:cbpD3 _hit-score:25_hit-evalue:0.60_identity-percent:42.8571428571429	2	0	0	2	0	0	2	0	0	1	0	0	0	0	0	0	0	0	2	0	0	1	0	0	1	0	0	1	0	0	0	0	1	0	0	2	0	0	0	0	0	0	0	0	0
259	NTTIPTSK	T3:+79.96633	b25.a1	gi|116627083|ref|YP_819702.1|STER_0163|Molecular chaperone [Streptococcus thermophilus LMD-9]_hit-name:dnaK _hit-score:1061_hit-evalue:0.0_identity-percent:92.5864909390445	0	0	1	0	0	1	0	0	0	0	0	0	0	0	0	0	0	0	0	1	1	0	0	0	0	0	0	0	0	0	0	0	0	0	1	0	0	0	0	0	0	0	0	0	0
260	LYEQAAAAQQAQAGAEGAQATDNSGDDVVDGEFTEK	S24:+79.96633	b25.a2	gi|116627083|ref|YP_819702.1|STER_0163|Molecular chaperone [Streptococcus thermophilus LMD-9]_hit-name:dnaK _hit-score:1061_hit-evalue:0.0_identity-percent:92.5864909390445	0	1	0	1	0	0	0	0	0	0	0	0	0	0	0	0	0	0	0	0	0	0	0	0	0	0	0	0	0	0	0	0	1	0	1	0	0	0	0	0	0	0	0	0	0
261	EQTIVIQSNSGLTDEEIER	S10:+79.96633	b25.a3	gi|116627083|ref|YP_819702.1|STER_0163|Molecular chaperone [Streptococcus thermophilus LMD-9]_hit-name:dnaK _hit-score:1061_hit-evalue:0.0_identity-percent:92.5864909390445	0	0	0	0	0	0	0	0	0	0	0	0	0	0	0	0	0	0	1	0	0	0	0	0	0	0	0	0	0	0	0	0	0	0	0	0	0	0	0	0	0	0	0	0	0
262	EQTIVIQSNSGLTDEEIER	S8:+79.96633	b25.a3	gi|116627083|ref|YP_819702.1|STER_0163|Molecular chaperone [Streptococcus thermophilus LMD-9]_hit-name:dnaK _hit-score:1061_hit-evalue:0.0_identity-percent:92.5864909390445	0	0	0	0	0	0	0	0	0	0	0	0	0	0	0	0	0	0	0	0	0	0	0	0	0	0	0	0	0	0	0	0	0	0	0	0	0	0	0	0	0	0	0	0	0
263	VTKAVITVPAYFNDAQR	T2:+79.96633 - T7:+79.96633	b25.a4	gi|116627083|ref|YP_819702.1|STER_0163|Molecular chaperone [Streptococcus thermophilus LMD-9]_hit-name:dnaK _hit-score:1061_hit-evalue:0.0_identity-percent:92.5864909390445	0	0	0	0	0	0	0	0	0	0	0	0	0	0	0	0	0	0	0	0	0	1	0	0	0	0	0	0	0	0	0	0	0	0	0	0	0	0	0	0	0	0	0	0	0
264	QALSDAGLSLSDIDEVILVGGSTR	S4:+79.96633	b25.a5	gi|116627083|ref|YP_819702.1|STER_0163|Molecular chaperone [Streptococcus thermophilus LMD-9]_hit-name:dnaK _hit-score:1061_hit-evalue:0.0_identity-percent:92.5864909390445	0	0	1	0	0	0	0	0	0	0	0	0	0	0	0	0	0	0	0	0	0	0	0	0	0	0	0	0	0	0	0	0	0	0	0	0	0	0	0	0	0	0	0	0	0
265	FQAAAGQLDQTAR	T11:+79.96633	b26.a1	gi|116628590|ref|YP_821209.1|STER_1899|Ribosomal protein L29 [Streptococcus thermophilus LMD-9]_hit-name:rpmC _hit-score:98_hit-evalue:2e-23_identity-percent:79.4117647058823	1	0	1	1	0	1	0	0	0	0	0	0	0	0	0	0	0	0	0	1	0	0	1	0	0	0	0	0	0	0	0	0	1	0	1	1	0	1	0	0	0	0	0	0	0
266	GLSQEELAK	S3:+79.96633	b26.a2	gi|116628590|ref|YP_821209.1|STER_1899|Ribosomal protein L29 [Streptococcus thermophilus LMD-9]_hit-name:rpmC _hit-score:98_hit-evalue:2e-23_identity-percent:79.4117647058823	0	1	0	0	0	0	0	0	0	0	0	0	0	0	0	0	0	0	0	0	0	0	0	0	0	0	0	0	0	0	0	0	0	0	0	0	0	0	0	0	0	0	0	0	0
267	FSVATSENEVK	S2:+79.96633	b27.a1	gi|116628117|ref|YP_820736.1|STER_1367|Na+/xyloside symporter or related transporter [Streptococcus thermophilus LMD-9]_hit-name:lacS _hit-score:1133_hit-evalue:0.0_identity-percent:91.1671924290221	0	0	1	0	0	0	0	0	1	0	0	0	0	0	0	0	0	0	0	0	0	0	0	0	0	0	0	0	0	0	0	0	0	0	0	0	0	0	0	0	0	0	0	0	0
268	FSVATSENEVK	S6:+79.96633	b27.a1	gi|116628117|ref|YP_820736.1|STER_1367|Na+/xyloside symporter or related transporter [Streptococcus thermophilus LMD-9]_hit-name:lacS _hit-score:1133_hit-evalue:0.0_identity-percent:91.1671924290221	0	0	0	0	0	1	0	0	0	0	0	0	0	0	0	0	0	0	0	0	0	0	0	1	0	0	0	0	0	0	0	0	0	0	0	0	0	0	0	0	0	0	0	0	0
269	FSVATSENEVK	T5:+79.96633	b27.a1	gi|116628117|ref|YP_820736.1|STER_1367|Na+/xyloside symporter or related transporter [Streptococcus thermophilus LMD-9]_hit-name:lacS _hit-score:1133_hit-evalue:0.0_identity-percent:91.1671924290221	0	0	0	1	0	0	0	0	0	0	0	0	0	0	0	0	0	0	0	1	0	0	1	0	0	0	0	0	0	0	0	0	0	0	0	0	0	0	0	0	0	0	0	0	0
271	ANVVSLVTPTTGYLVDLSSVNDEHFASGSMGK	T8:+79.96633	b27.a2	gi|116628117|ref|YP_820736.1|STER_1367|Na+/xyloside symporter or related transporter [Streptococcus thermophilus LMD-9]_hit-name:lacS _hit-score:1133_hit-evalue:0.0_identity-percent:91.1671924290221	1	0	0	0	0	0	0	0	0	0	0	0	0	0	0	0	0	0	0	0	0	0	0	0	0	0	0	0	0	0	0	0	0	0	0	0	0	0	0	0	0	0	0	0	0
272	ANVVSLVTPTTGYLVDLSSVNDEHFASGSMGK	T11:+79.96633	b27.a2	gi|116628117|ref|YP_820736.1|STER_1367|Na+/xyloside symporter or related transporter [Streptococcus thermophilus LMD-9]_hit-name:lacS _hit-score:1133_hit-evalue:0.0_identity-percent:91.1671924290221	0	0	0	0	0	0	0	0	0	0	0	0	0	0	0	0	0	0	0	0	0	0	0	1	0	0	0	0	0	0	0	0	0	0	0	0	0	0	0	0	0	0	0	0	0
273	ANVVSLVTPTTGYLVDLSSVNDEHFASGSMGK	S19:+79.96633	b27.a2	gi|116628117|ref|YP_820736.1|STER_1367|Na+/xyloside symporter or related transporter [Streptococcus thermophilus LMD-9]_hit-name:lacS _hit-score:1133_hit-evalue:0.0_identity-percent:91.1671924290221	0	0	0	0	0	0	0	0	0	0	0	0	0	0	0	0	0	0	0	0	0	0	1	0	0	0	0	0	0	0	0	0	0	0	0	0	0	0	0	0	0	0	0	0	0
270	ANVVSLVTPTTGYLVDLSSVNDEHFASGSMGK	S18:+79.96633	b27.a2	gi|116628117|ref|YP_820736.1|STER_1367|Na+/xyloside symporter or related transporter [Streptococcus thermophilus LMD-9]_hit-name:lacS _hit-score:1133_hit-evalue:0.0_identity-percent:91.1671924290221	0	0	0	1	0	1	0	0	0	0	0	0	0	0	0	0	0	0	0	0	0	0	0	0	0	0	0	0	0	0	0	0	0	0	0	0	0	0	0	0	0	0	0	0	0
274	NGLDDTVLVTVTNSEK	T6:+79.96633	b27.a3	gi|116628117|ref|YP_820736.1|STER_1367|Na+/xyloside symporter or related transporter [Streptococcus thermophilus LMD-9]_hit-name:lacS _hit-score:1133_hit-evalue:0.0_identity-percent:91.1671924290221	0	0	0	1	0	0	0	0	0	0	0	0	0	0	0	0	0	0	0	0	0	0	0	0	0	0	0	0	0	0	0	0	0	0	0	0	0	0	0	0	0	0	0	0	0
275	LDAALAASQDELSVIREK	S13:+79.96633	b28.a1	gi|116628007|ref|YP_820626.1|STER_1242|Phosphoenolpyruvate-protein kinase (PTS system EI component in bacteria) [Streptococcus thermophilus LMD-9]_hit-name:ptsI _hit-score:1082_hit-evalue:0.0_identity-percent:97.5736568457539	1	1	2	1	0	0	0	0	0	0	0	0	0	0	0	0	0	0	0	1	0	0	1	0	0	0	0	0	0	0	0	0	0	0	0	0	1	0	0	0	0	0	0	0	0
276	LDAALAASQDELSVIREK	S8:+79.96633	b28.a1	gi|116628007|ref|YP_820626.1|STER_1242|Phosphoenolpyruvate-protein kinase (PTS system EI component in bacteria) [Streptococcus thermophilus LMD-9]_hit-name:ptsI _hit-score:1082_hit-evalue:0.0_identity-percent:97.5736568457539	0	0	0	0	1	1	0	0	0	0	0	0	0	0	0	0	0	0	0	0	0	0	0	0	0	0	0	0	0	0	0	0	0	0	0	0	0	0	0	0	0	0	0	0	0
277	ASADELQAIIDEAWKNPEFQEASK	S23:+79.96633	b29.a1	gi|116628019|ref|YP_820638.1|STER_1257|ldh|L-lactate dehydrogenase [Streptococcus thermophilus LMD-9]_hit-name:ldh _hit-score:642_hit-evalue:0.0_identity-percent:100	0	0	0	0	0	0	0	0	0	0	0	0	0	0	0	1	0	0	3	0	0	1	0	0	0	0	0	0	0	0	0	0	3	0	0	1	0	0	0	0	0	0	0	0	0
278	MKASADELQAIIDEAWKNPEFQEASK	S25:+79.96633	b29.a1	gi|116628019|ref|YP_820638.1|STER_1257|ldh|L-lactate dehydrogenase [Streptococcus thermophilus LMD-9]_hit-name:ldh _hit-score:642_hit-evalue:0.0_identity-percent:100	0	0	0	0	0	0	0	0	0	0	0	0	0	0	0	0	0	0	0	0	0	0	0	0	0	0	0	0	0	0	0	0	0	0	0	0	0	0	0	0	0	0	0	0	0
279	AVGDALDLSHALPFTSPK	S9:+79.96633	b29.a2	gi|116628019|ref|YP_820638.1|STER_1257|ldh|L-lactate dehydrogenase [Streptococcus thermophilus LMD-9]_hit-name:ldh _hit-score:642_hit-evalue:0.0_identity-percent:100	1	0	0	0	0	0	0	0	0	0	0	0	0	0	0	0	0	0	0	0	0	0	0	0	0	0	0	0	0	0	0	0	0	0	0	0	0	0	0	0	0	0	0	0	0
280	MTTENIGEIVIAPR	M1:+15.99491 - T3:+79.96633 - M1:+42.01057	b30.a1	gi|116628434|ref|YP_821053.1|STER_1714|hypothetical protein STER_1714 [Streptococcus thermophilus LMD-9]_hit-name:asp _hit-score:52_hit-evalue:3e-09_identity-percent:28.9719626168224	0	0	0	0	0	0	0	0	0	0	0	0	0	0	0	0	0	0	0	1	0	0	0	0	0	0	0	0	0	0	0	0	0	0	0	0	1	1	0	0	0	0	0	0	0
281	MTTENIGEIVIAPR	M1:+15.99491 - T2:+79.96633 - M1:+42.01057	b30.a1	gi|116628434|ref|YP_821053.1|STER_1714|hypothetical protein STER_1714 [Streptococcus thermophilus LMD-9]_hit-name:asp _hit-score:52_hit-evalue:3e-09_identity-percent:28.9719626168224	0	1	1	0	1	1	0	0	0	0	0	0	0	0	0	0	0	0	0	0	1	0	0	1	0	0	0	0	0	0	0	0	0	2	1	0	0	0	0	0	0	0	0	0	0
282	SDVQKTQVLR	T6:+79.96633	b31.a1	gi|116627607|ref|YP_820226.1|STER_0779|Cell division protein [Streptococcus thermophilus LMD-9]_hit-name:int _hit-score:27_hit-evalue:0.22_identity-percent:29.5454545454545	0	0	0	1	0	1	0	0	0	0	0	0	0	0	0	0	0	0	0	1	0	0	1	1	0	0	0	0	0	0	0	0	1	0	0	1	0	1	0	0	0	0	0	0	0
283	MAESIAGQK	S4:+79.96633	b32.a1	gi|116627931|ref|YP_820550.1|STER_1163|Pyruvate kinase [Streptococcus thermophilus LMD-9]_hit-name:pyk _hit-score:909_hit-evalue:0.0_identity-percent:94.2	1	0	0	1	0	0	0	0	0	0	0	0	0	0	0	0	0	0	0	0	0	1	0	0	0	0	0	0	0	0	0	0	1	0	0	0	0	0	0	0	0	0	0	0	0
284	LIVALTESGNTAR	S8:+79.96633	b32.a2	gi|116627931|ref|YP_820550.1|STER_1163|Pyruvate kinase [Streptococcus thermophilus LMD-9]_hit-name:pyk _hit-score:909_hit-evalue:0.0_identity-percent:94.2	0	0	0	0	0	0	0	0	0	0	0	0	0	0	0	0	0	0	0	0	0	1	0	0	0	0	0	0	0	0	0	0	1	0	0	0	0	0	0	0	0	0	0	0	0
285	LIVALTESGNTAR	T6:+79.96633	b32.a2	gi|116627931|ref|YP_820550.1|STER_1163|Pyruvate kinase [Streptococcus thermophilus LMD-9]_hit-name:pyk _hit-score:909_hit-evalue:0.0_identity-percent:94.2	0	0	0	0	0	0	0	0	0	0	0	0	0	0	0	0	0	0	1	0	0	0	0	0	0	0	0	0	0	0	0	0	0	0	0	0	0	0	0	0	0	0	0	0	0
286	VALESGLVESGDNIVIVAGIPVGSGNTNTMR	S10:+79.96633	b32.a3	gi|116627931|ref|YP_820550.1|STER_1163|Pyruvate kinase [Streptococcus thermophilus LMD-9]_hit-name:pyk _hit-score:909_hit-evalue:0.0_identity-percent:94.2	0	0	0	0	0	0	0	0	0	0	0	0	0	0	0	0	0	0	0	0	0	0	1	0	0	0	0	0	0	0	0	0	0	0	1	0	0	0	0	0	0	0	0	0	0
287	SFSFDSASVQGAVIK	S6:+79.96633	b33.a1	gi|116627605|ref|YP_820224.1|STER_0777|Cell division GTPase [Streptococcus thermophilus LMD-9]_hit-name:ftsZ _hit-score:718_hit-evalue:0.0_identity-percent:87.0454545454545	0	0	0	0	0	0	0	0	0	0	0	0	0	0	0	0	0	0	0	1	0	0	1	0	0	0	0	0	0	0	0	0	0	0	1	0	0	0	0	0	0	0	0	0	0
288	SFSFDSASVQGAVIK	S3:+79.96633	b33.a1	gi|116627605|ref|YP_820224.1|STER_0777|Cell division GTPase [Streptococcus thermophilus LMD-9]_hit-name:ftsZ _hit-score:718_hit-evalue:0.0_identity-percent:87.0454545454545	0	0	0	0	0	0	0	0	0	0	0	0	0	0	0	0	0	0	0	0	1	0	0	1	0	0	0	0	0	0	0	0	0	0	1	0	0	0	0	0	0	0	0	0	0
289	KVTTAPSQSSVPNQQVAQEQQR	S7:+79.96633	b33.a2	gi|116627605|ref|YP_820224.1|STER_0777|Cell division GTPase [Streptococcus thermophilus LMD-9]_hit-name:ftsZ _hit-score:718_hit-evalue:0.0_identity-percent:87.0454545454545	0	0	0	0	0	0	0	0	0	0	0	0	0	0	0	0	0	0	0	0	0	0	0	0	0	0	0	0	0	0	0	0	1	0	0	0	0	0	0	0	0	0	0	0	0
290	KVTTAPSQSSVPNQQVAQEQQR	S9:+79.96633	b33.a2	gi|116627605|ref|YP_820224.1|STER_0777|Cell division GTPase [Streptococcus thermophilus LMD-9]_hit-name:ftsZ _hit-score:718_hit-evalue:0.0_identity-percent:87.0454545454545	0	0	0	0	0	0	0	0	0	0	0	0	0	0	0	0	0	0	0	0	0	0	0	0	0	0	0	0	0	0	0	0	0	0	0	0	1	0	0	0	0	0	0	0	0
291	RDNIVQAIEEGLSQTQELENQNEK	S13:+79.96633	b34.a1	gi|116627378|ref|YP_819997.1|STER_0523|cell division membrane protein [Streptococcus thermophilus LMD-9]_hit-name:ftsW _hit-score:744_hit-evalue:0.0_identity-percent:90.3755868544601	0	0	0	1	0	0	0	0	0	0	0	0	0	0	0	0	0	0	0	0	0	0	0	0	0	0	0	0	0	0	0	0	0	0	0	0	0	0	0	0	0	0	0	0	0
292	RDNIVQAIEEGLSQTQELENQNEK	T15:+79.96633	b34.a1	gi|116627378|ref|YP_819997.1|STER_0523|cell division membrane protein [Streptococcus thermophilus LMD-9]_hit-name:ftsW _hit-score:744_hit-evalue:0.0_identity-percent:90.3755868544601	0	0	0	0	0	0	0	0	0	0	0	0	0	0	0	0	0	0	0	1	0	0	0	0	0	0	0	0	0	0	0	0	1	0	0	0	0	0	0	0	0	0	0	0	0
293	DNIVQAIEEGLSQTQELENQNEK	T14:+79.96633	b34.a1	gi|116627378|ref|YP_819997.1|STER_0523|cell division membrane protein [Streptococcus thermophilus LMD-9]_hit-name:ftsW _hit-score:744_hit-evalue:0.0_identity-percent:90.3755868544601	0	0	0	0	0	0	0	0	0	0	0	0	0	0	0	0	0	0	0	0	0	0	0	0	0	0	1	0	0	0	0	0	1	0	0	0	0	1	0	0	0	0	0	0	0
294	DNIVQAIEEGLSQTQELENQNEK	S12:+79.96633	b34.a1	gi|116627378|ref|YP_819997.1|STER_0523|cell division membrane protein [Streptococcus thermophilus LMD-9]_hit-name:ftsW _hit-score:744_hit-evalue:0.0_identity-percent:90.3755868544601	0	0	0	0	0	0	0	0	0	0	0	0	0	0	0	0	0	0	0	0	1	0	0	1	0	0	0	0	0	0	0	0	0	0	0	0	0	0	0	0	0	0	0	0	0
295	GYAQNNPIVEYQSESFK	Y2:+79.96633	b35.a1	gi|116628425|ref|YP_821044.1|STER_1705|secA|Preprotein translocase subunit SecA (ATPase, RNA helicase) [Streptococcus thermophilus LMD-9]_hit-name:secA _hit-score:1643_hit-evalue:0.0_identity-percent:98.5865724381625	0	1	1	1	0	0	0	0	0	0	0	0	0	0	0	0	0	0	0	1	0	0	0	0	0	0	0	0	0	0	0	0	0	0	0	0	0	0	0	0	0	0	0	0	0
296	VSTTATGNIQAHQADANGQEIDFSK	T4:+79.96633	b35.a2	gi|116628425|ref|YP_821044.1|STER_1705|secA|Preprotein translocase subunit SecA (ATPase, RNA helicase) [Streptococcus thermophilus LMD-9]_hit-name:secA _hit-score:1643_hit-evalue:0.0_identity-percent:98.5865724381625	1	0	0	0	0	0	0	0	0	0	0	0	0	0	0	0	0	0	0	0	0	0	0	0	0	0	0	0	0	0	0	0	0	0	0	0	0	0	0	0	0	0	0	0	0
297	VSTTATGNIQAHQADANGQEIDFSK	T6:+79.96633	b35.a2	gi|116628425|ref|YP_821044.1|STER_1705|secA|Preprotein translocase subunit SecA (ATPase, RNA helicase) [Streptococcus thermophilus LMD-9]_hit-name:secA _hit-score:1643_hit-evalue:0.0_identity-percent:98.5865724381625	0	0	0	0	0	0	0	0	0	0	0	0	0	0	0	0	0	0	0	1	0	0	1	0	0	0	0	0	0	0	0	0	0	0	0	1	0	0	0	0	0	0	0	0	0
298	KPVEETSVPVGHK	T6:+79.96633	b36.a1	gi|116627594|ref|YP_820213.1|STER_0765|hypothetical protein STER_0765 [Streptococcus thermophilus LMD-9]_hit-name:tnpSth1 _hit-score:30_hit-evalue:0.062_identity-percent:20.4081632653061	0	0	1	0	0	0	0	0	0	0	0	0	0	0	0	0	0	0	0	1	0	0	1	1	0	0	0	0	0	0	0	0	0	0	1	1	0	0	0	0	0	0	0	0	0
299	KPVEETSVPVGHK	S7:+79.96633	b36.a1	gi|116627594|ref|YP_820213.1|STER_0765|hypothetical protein STER_0765 [Streptococcus thermophilus LMD-9]_hit-name:tnpSth1 _hit-score:30_hit-evalue:0.062_identity-percent:20.4081632653061	0	0	0	0	0	1	0	0	0	0	0	0	0	0	0	0	0	0	0	0	1	0	0	0	0	0	0	0	0	0	0	0	0	0	0	0	0	0	0	0	0	0	0	0	0
300	SFIDKGELVPDEVTNGIVK	S1:+79.96633	b37.a1	gi|116628577|ref|YP_821196.1|STER_1886|Adenylate kinase [Streptococcus thermophilus LMD-9]_hit-name:adk _hit-score:433_hit-evalue:1e-123_identity-percent:99.5412844036697	1	1	0	2	0	1	0	0	0	0	0	0	0	0	0	0	0	0	1	1	0	2	1	0	0	0	0	0	0	0	0	0	0	0	0	0	0	0	0	0	0	0	0	0	0
301	IGETHEGASQMDWMEQEQER	T4:+79.96633	b38.a1	gi|116628478|ref|YP_821097.1|STER_1762|Translation elongation factor (GTPase) [Streptococcus thermophilus LMD-9]_hit-name:fus _hit-score:1366_hit-evalue:0.0_identity-percent:100	1	0	0	1	0	0	0	0	0	0	0	0	0	0	0	0	0	0	0	1	0	0	0	0	0	0	0	0	0	0	0	0	1	0	0	1	0	0	0	0	0	0	0	0	0
302	IGETHEGASQMDWMEQEQER	S9:+79.96633	b38.a1	gi|116628478|ref|YP_821097.1|STER_1762|Translation elongation factor (GTPase) [Streptococcus thermophilus LMD-9]_hit-name:fus _hit-score:1366_hit-evalue:0.0_identity-percent:100	0	0	0	0	0	0	0	0	0	0	0	0	0	0	0	0	0	0	0	0	0	0	0	0	0	0	0	0	0	0	0	0	0	1	1	0	0	1	0	0	0	0	0	0	0
303	EIVHLGLEDNNFDSDINPLETTGAYLSPK	T21:+79.96633	b39.a1	gi|116627434|ref|YP_820053.1|STER_0588|Predicted sulfurtransferase [Streptococcus thermophilus LMD-9]_hit-name:rheB _hit-score:28_hit-evalue:0.27_identity-percent:44.7368421052632	1	0	0	0	0	0	0	0	0	0	0	0	0	0	0	0	0	0	0	1	0	0	0	1	0	0	0	0	0	0	0	0	1	0	0	1	0	0	0	0	0	0	0	0	0
304	EIVHLGLEDNNFDSDINPLETTGAYLSPK	T22:+79.96633	b39.a1	gi|116627434|ref|YP_820053.1|STER_0588|Predicted sulfurtransferase [Streptococcus thermophilus LMD-9]_hit-name:rheB _hit-score:28_hit-evalue:0.27_identity-percent:44.7368421052632	0	0	0	0	0	1	0	0	0	0	0	0	0	0	0	0	0	0	0	0	0	0	0	0	0	0	0	0	0	0	0	0	0	0	0	0	0	1	0	0	0	0	0	0	0
305	FDSILTDNGATVVESK	S3:+79.96633	b40.a1	gi|116628446|ref|YP_821065.1|STER_1728|rpsF|Ribosomal protein S6 [Streptococcus thermophilus LMD-9]_hit-name:rpsF _hit-score:190_hit-evalue:4e-51_identity-percent:98.9583333333333	0	0	1	0	1	0	0	0	0	0	0	0	0	0	0	0	0	0	0	0	0	0	1	0	0	0	0	0	0	0	0	0	0	1	1	0	1	0	0	0	0	0	0	0	0
306	TGTVTMDVAK	T5:+79.96633	b41.a1	gi|116628505|ref|YP_821124.1|STER_1797|rplA|Ribosomal protein L1 [Streptococcus thermophilus LMD-9]_hit-name:rplA _hit-score:417_hit-evalue:1e-119_identity-percent:94.7598253275109	1	1	1	1	0	0	1	0	0	1	0	0	0	0	0	0	0	0	0	0	0	0	0	0	0	0	0	0	0	0	0	0	0	0	0	0	0	0	0	0	0	0	0	0	0
307	HSNETVEFEGETYPLIR	T5:+79.96633	b42.a1	gi|116627614|ref|YP_820233.1|STER_0787|rpmE2|Ribosomal protein L31 [Streptococcus thermophilus LMD-9]_hit-name:rpmE _hit-score:169_hit-evalue:5e-45_identity-percent:100	0	0	2	1	0	0	0	0	0	0	0	0	0	0	0	0	0	0	0	0	0	0	0	0	0	0	0	0	0	0	0	0	0	0	0	0	0	0	0	0	0	0	0	0	0
308	HSNETVEFEGETYPLIR	S2:+79.96633	b42.a1	gi|116627614|ref|YP_820233.1|STER_0787|rpmE2|Ribosomal protein L31 [Streptococcus thermophilus LMD-9]_hit-name:rpmE _hit-score:169_hit-evalue:5e-45_identity-percent:100	0	0	0	0	0	0	0	0	0	0	0	0	0	0	0	0	0	0	0	1	0	0	0	0	0	0	0	0	0	0	0	0	0	0	0	0	0	0	0	0	0	0	0	0	0
309	VEISSDSHPFYTGR	S4:+79.96633	b42.a2	gi|116627614|ref|YP_820233.1|STER_0787|rpmE2|Ribosomal protein L31 [Streptococcus thermophilus LMD-9]_hit-name:rpmE _hit-score:169_hit-evalue:5e-45_identity-percent:100	0	1	0	0	0	0	0	0	0	0	0	0	0	0	0	0	0	0	0	1	0	0	0	0	0	0	0	0	0	0	0	0	0	0	0	0	0	0	0	0	0	0	0	0	0
310	MNTDETITIYDVAR	M1:+15.99491 - T3:+79.96633 - M1:+42.01057	b43.a1	gi|116627515|ref|YP_820134.1|STER_0679|catabolite control protein A [Streptococcus thermophilus LMD-9]_hit-name:tnp1191 _hit-score:_hit-evalue:0.042_identity-percent:34.1463414634146	0	0	1	0	1	0	0	0	0	0	0	0	0	0	0	0	0	0	0	1	1	0	0	0	0	0	0	0	0	0	0	0	0	0	0	0	0	1	0	0	0	0	0	0	0
311	TGKLPGNQGEAVNPTQQHGPK	T1:+79.96633	b44.a1	gi|116628305|ref|YP_820924.1|STER_1578|ATP-binding subunit of Clp protease and DnaK/DnaJ chaperones [Streptococcus thermophilus LMD-9]_hit-name:clpL _hit-score:1241_hit-evalue:0.0_identity-percent:93.7134502923977	0	0	0	0	0	0	0	0	0	0	0	0	0	0	0	0	0	0	0	0	0	0	0	0	0	0	0	0	0	0	0	0	0	1	0	0	2	0	0	0	0	0	0	0	0
312	LIGTTAGYVGYDDNSNTLTER	T4:+79.96633	b44.a2	gi|116628305|ref|YP_820924.1|STER_1578|ATP-binding subunit of Clp protease and DnaK/DnaJ chaperones [Streptococcus thermophilus LMD-9]_hit-name:clpL _hit-score:1241_hit-evalue:0.0_identity-percent:93.7134502923977	0	0	0	0	0	0	0	0	0	0	0	0	0	0	0	0	0	0	0	0	0	0	0	0	0	0	0	0	0	0	0	0	0	0	0	0	0	0	0	0	0	0	0	0	0
313	LIGTTAGYVGYDDNSNTLTER	S15:+79.96633	b44.a2	gi|116628305|ref|YP_820924.1|STER_1578|ATP-binding subunit of Clp protease and DnaK/DnaJ chaperones [Streptococcus thermophilus LMD-9]_hit-name:clpL _hit-score:1241_hit-evalue:0.0_identity-percent:93.7134502923977	0	0	0	0	0	0	0	0	0	0	0	0	0	0	0	0	0	0	0	0	0	0	0	0	0	0	0	0	0	0	0	0	0	0	0	0	0	0	0	0	0	0	0	0	0
314	SQLDFDTNTITEK	T9:+79.96633	b45.a1	gi|116627632|ref|YP_820251.1|STER_0808|Cation transport ATPase [Streptococcus thermophilus LMD-9]_hit-name:pacL1 _hit-score:1602_hit-evalue:0.0_identity-percent:95.6719817767654	1	0	0	0	0	0	0	0	0	0	0	0	0	0	0	0	0	0	0	1	0	0	1	0	0	0	0	0	0	0	0	0	1	0	0	0	0	0	0	0	0	0	0	0	0
315	YMNEKPVAK	Y1:+79.96633	b45.a2	gi|116627632|ref|YP_820251.1|STER_0808|Cation transport ATPase [Streptococcus thermophilus LMD-9]_hit-name:pacL1 _hit-score:1602_hit-evalue:0.0_identity-percent:95.6719817767654	0	0	0	1	0	0	0	0	0	0	0	0	0	0	0	0	0	0	0	0	0	0	0	0	0	0	0	0	0	0	0	0	0	0	0	0	0	0	0	0	0	0	0	0	0
316	SGTTTEPAIAFR	T4:+79.96633	b46.a1	gi|116627134|ref|YP_819753.1|STER_0241|p gi|Glucose-6-phosphate isomerase [Streptococcus thermophilus LMD-9]_hit-name:pgi _hit-score:890_hit-evalue:0.0_identity-percent:100	0	0	0	0	0	0	0	0	0	1	0	0	0	0	0	0	0	0	0	0	1	0	0	0	0	0	0	0	0	0	0	0	0	1	0	1	0	0	0	0	0	0	0	0	0
317	QLAGESEGKDQRGIYPTSANFSTDLHSLGQFIQEGTR	T17:+79.96633 - Q1:-17.02655	b46.a2	gi|116627134|ref|YP_819753.1|STER_0241|p gi|Glucose-6-phosphate isomerase [Streptococcus thermophilus LMD-9]_hit-name:pgi _hit-score:890_hit-evalue:0.0_identity-percent:100	0	0	0	0	0	0	0	0	0	0	0	0	0	0	0	0	0	0	0	0	0	0	0	0	0	0	0	0	0	0	0	0	0	0	0	0	0	0	0	0	0	0	0	0	0
318	ATETTEEVVEETKETSELEEAQAR	T4:+79.96633 - A1:+42.01056	b47.a1	gi|116627082|ref|YP_819701.1|STER_0162|Molecular chaperone GrpE (heat shock protein) [Streptococcus thermophilus LMD-9]_hit-name:grpE _hit-score:252_hit-evalue:3e-69_identity-percent:91.4893617021277	0	1	0	0	0	0	0	0	0	0	0	0	0	0	0	0	0	0	0	0	0	0	0	0	0	0	0	0	0	0	0	0	0	0	0	0	0	0	0	0	0	0	0	0	0
319	ATETTEEVVEETKETSELEEAQAR	T2:+79.96633 - A1:+42.01056	b47.a1	gi|116627082|ref|YP_819701.1|STER_0162|Molecular chaperone GrpE (heat shock protein) [Streptococcus thermophilus LMD-9]_hit-name:grpE _hit-score:252_hit-evalue:3e-69_identity-percent:91.4893617021277	0	0	0	0	0	0	0	1	0	0	0	0	0	0	0	0	0	0	0	1	0	0	0	0	0	0	0	0	0	0	0	0	0	0	0	0	0	0	0	0	0	0	0	0	0
320	MTEDIKEEEVKEEEATETTEEVVEETK	M1:+15.99491 - T2:+79.96633 - M1:+42.01057	b47.a2	gi|116627082|ref|YP_819701.1|STER_0162|Molecular chaperone GrpE (heat shock protein) [Streptococcus thermophilus LMD-9]_hit-name:grpE _hit-score:252_hit-evalue:3e-69_identity-percent:91.4893617021277	0	0	0	0	0	1	0	0	0	0	0	0	0	0	0	0	0	0	0	0	0	0	0	0	0	0	0	0	0	0	0	0	0	0	0	0	0	0	0	0	0	0	0	0	0
321	YFESLEEFSEGEMK	S9:+79.96633	b48.a1	gi|116628116|ref|YP_820735.1|STER_1366|Beta-galactosidase [Streptococcus thermophilus LMD-9]_hit-name:lacZ _hit-score:2081_hit-evalue:0.0_identity-percent:98.5380116959064	0	0	0	1	0	0	0	0	0	1	0	0	0	0	0	0	0	0	0	1	0	0	1	0	0	0	0	0	0	0	0	0	0	0	0	1	0	0	0	0	0	0	0	0	0
322	ANGALELVIKPYDTYQIFDSNGEPISSEQK	S26:+79.96633	b49.a1	gi|116627484|ref|YP_820103.1|STER_0644|Peptidoglycan interpeptide bridge formation enzyme [Streptococcus thermophilus LMD-9]_hit-name:murN _hit-score:815_hit-evalue:0.0_identity-percent:99.0267639902676	0	0	1	0	0	0	0	0	0	0	0	0	0	0	0	0	0	0	1	0	1	0	1	0	0	0	0	0	0	0	0	0	0	0	0	0	0	0	0	0	0	0	0	0	0
323	ANGALELVIKPYDTYQIFDSNGEPISSEQK	S27:+79.96633	b49.a1	gi|116627484|ref|YP_820103.1|STER_0644|Peptidoglycan interpeptide bridge formation enzyme [Streptococcus thermophilus LMD-9]_hit-name:murN _hit-score:815_hit-evalue:0.0_identity-percent:99.0267639902676	0	0	0	0	0	0	0	0	0	0	0	0	0	0	0	0	0	0	0	1	0	0	0	0	0	0	0	0	0	0	0	0	0	0	0	0	0	0	0	0	0	0	0	0	0
324	VTSASASRPAYASATSEPSHATGNIASASNYDILK	T22:+79.96633	b50.a1	gi|116627168|ref|YP_819787.1|STER_0280|Cell division initiation protein [Streptococcus thermophilus LMD-9]_hit-name:divIVA _hit-score:44_hit-evalue:9e-07_identity-percent:40	0	0	1	0	0	0	0	0	0	0	0	0	0	0	0	0	0	0	0	0	0	0	0	0	0	0	0	0	0	0	0	0	0	0	0	0	0	0	0	0	0	0	0	0	0
325	VTSASASRPAYASATSEPSHATGNIASASNYDILK	S16:+79.96633	b50.a1	gi|116627168|ref|YP_819787.1|STER_0280|Cell division initiation protein [Streptococcus thermophilus LMD-9]_hit-name:divIVA _hit-score:44_hit-evalue:9e-07_identity-percent:40	0	0	0	0	0	0	0	0	0	0	0	0	0	0	0	0	0	0	0	0	0	0	0	0	0	0	0	0	0	0	0	0	0	0	0	0	0	0	0	0	0	0	0	0	0
326	VTSASASRPAYASATSEPSHATGNIASASNYDILK	S13:+79.96633	b50.a1	gi|116627168|ref|YP_819787.1|STER_0280|Cell division initiation protein [Streptococcus thermophilus LMD-9]_hit-name:divIVA _hit-score:44_hit-evalue:9e-07_identity-percent:40	1	0	0	0	0	0	0	0	0	0	0	0	0	0	0	0	0	0	0	0	0	0	0	0	0	0	0	0	0	0	0	0	0	0	0	0	0	0	0	0	0	0	0	0	0
327	VAEIGVSYAGTPVLAHELASK	S20:+79.96633	b51.a1	gi|116627945|ref|YP_820564.1|STER_1178|hypothetical protein STER_1178 [Streptococcus thermophilus LMD-9]_hit-name:obg _hit-score:27_hit-evalue:0.29_identity-percent:26.4367816091954	0	0	0	0	0	0	0	0	0	0	0	0	0	0	0	0	0	0	0	1	0	0	0	0	0	0	0	0	0	0	0	0	0	0	0	0	0	0	0	0	0	0	0	0	0
328	VAEIGVSYAGTPVLAHELASK	T11:+79.96633	b51.a1	gi|116627945|ref|YP_820564.1|STER_1178|hypothetical protein STER_1178 [Streptococcus thermophilus LMD-9]_hit-name:obg _hit-score:27_hit-evalue:0.29_identity-percent:26.4367816091954	0	1	0	0	0	0	0	0	0	0	0	0	0	0	0	0	0	0	0	0	0	0	1	0	0	0	0	0	0	0	0	0	0	0	0	0	0	0	0	0	0	0	0	0	0
329	TIEPELVEK	T1:+79.96633 - T1:+42.01056	b51.a2	gi|116627945|ref|YP_820564.1|STER_1178|hypothetical protein STER_1178 [Streptococcus thermophilus LMD-9]_hit-name:obg _hit-score:27_hit-evalue:0.29_identity-percent:26.4367816091954	1	0	0	0	0	0	0	0	0	0	0	0	0	0	0	0	0	0	0	0	0	0	0	0	0	0	0	0	0	0	0	0	0	0	0	0	0	0	0	0	0	0	0	0	0
330	DGGVDIVTSSLPSDIKDAVVK	T8:+79.96633	b52.a1	gi|116627672|ref|YP_820291.1|STER_0856|Uncharacterized ABC-type transport system, periplasmic component/surface lipoprotein [Streptococcus thermophilus LMD-9]_hit-name:ileS _hit-score:26_hit-evalue:1.1_identity-percent:21.6216216216216	0	0	0	0	0	0	0	0	0	0	0	0	0	0	0	0	0	0	0	0	0	0	1	0	0	0	0	0	0	0	0	0	1	0	0	1	0	0	0	0	0	0	0	0	0
331	GATVTGSGKPATLETGLVVNVPDFIEAGQK	T5:+79.96633	b53.a1	gi|116628435|ref|YP_821054.1|STER_1715|Translation elongation factor P (EF-P)/translation initiation factor 5A (eIF-5A) [Streptococcus thermophilus LMD-9]_hit-name:efp _hit-score:328_hit-evalue:3e-92_identity-percent:90.8602150537634	0	0	0	1	0	0	0	0	0	0	0	0	0	0	0	0	0	0	0	0	0	0	0	0	0	0	0	0	0	0	0	0	0	0	0	0	0	0	0	0	0	0	0	0	0
332	GATVTGSGKPATLETGLVVNVPDFIEAGQK	T3:+79.96633	b53.a1	gi|116628435|ref|YP_821054.1|STER_1715|Translation elongation factor P (EF-P)/translation initiation factor 5A (eIF-5A) [Streptococcus thermophilus LMD-9]_hit-name:efp _hit-score:328_hit-evalue:3e-92_identity-percent:90.8602150537634	0	0	0	0	0	0	0	0	0	0	0	0	0	0	0	0	0	0	0	0	0	0	0	0	0	0	0	0	0	0	0	0	0	0	0	1	0	0	0	0	0	0	0	0	0
333	GATVTGSGKPATLETGLVVNVPDFIEAGQK	S7:+79.96633	b53.a1	gi|116628435|ref|YP_821054.1|STER_1715|Translation elongation factor P (EF-P)/translation initiation factor 5A (eIF-5A) [Streptococcus thermophilus LMD-9]_hit-name:efp _hit-score:328_hit-evalue:3e-92_identity-percent:90.8602150537634	1	0	0	0	0	0	0	0	0	0	0	0	0	0	0	0	0	0	0	0	0	0	0	0	0	0	0	0	0	0	0	0	0	0	0	0	0	0	0	0	0	0	0	0	0
334	LMMETIMKWSDQAYGIK	S10:+79.96633 - T5:+79.96633 - Y14:+79.96633	b54.a1	gi|116628119|ref|YP_820738.1|STER_1369|UDP-glucose 4-epimerase [Streptococcus thermophilus LMD-9]_hit-name:galE1 _hit-score:674_hit-evalue:0.0_identity-percent:99.3993993993994	0	0	0	1	0	0	0	0	0	0	0	0	0	0	0	0	0	0	0	0	0	1	0	0	0	0	0	0	0	0	0	0	0	0	0	0	0	0	0	0	0	0	0	0	0
335	SNTATFNTSQNLK	T8:+79.96633	b55.a1	gi|116627463|ref|YP_820082.1|STER_0618|Predicted membrane protein, hemolysin III homolog [Streptococcus thermophilus LMD-9]_hit-name:hlyIII _hit-score:428_hit-evalue:1e-122_identity-percent:94.6666666666667	0	0	0	0	0	1	0	0	0	0	0	0	0	0	0	0	0	0	0	0	0	0	0	1	0	0	0	0	0	0	0	0	0	0	0	0	0	0	0	0	0	0	0	0	0
336	FEIERRQTTNYQDDQGLNSNSIK	T8:+79.96633 - T9:+79.96633 - Y11:+79.96633 - F1:+42.01056	b56.a1	gi|116627556|ref|YP_820175.1|STER_0723|hypothetical protein STER_0723 [Streptococcus thermophilus LMD-9]_hit-name:sthII _hit-score:20_hit-evalue:6.6_identity-percent:25.7142857142857	0	0	0	0	0	0	0	0	0	0	0	0	0	0	0	0	0	0	0	0	1	0	0	0	0	0	0	0	0	0	0	0	0	0	0	0	0	0	0	0	0	0	0	0	0
337	TTNYQDDQGLNSNSIK	T2:+79.96633	b56.a1	gi|116627556|ref|YP_820175.1|STER_0723|hypothetical protein STER_0723 [Streptococcus thermophilus LMD-9]_hit-name:sthII _hit-score:20_hit-evalue:6.6_identity-percent:25.7142857142857	0	0	0	0	0	0	0	0	0	0	0	0	0	0	0	0	0	0	0	1	0	0	0	0	0	0	0	0	0	0	0	0	0	0	0	0	0	0	0	0	0	0	0	0	0
338	QTTNYQDDQGLNSNSIK	Y5:+79.96633	b56.a1	gi|116627556|ref|YP_820175.1|STER_0723|hypothetical protein STER_0723 [Streptococcus thermophilus LMD-9]_hit-name:sthII _hit-score:20_hit-evalue:6.6_identity-percent:25.7142857142857	0	0	0	0	0	0	0	0	0	0	0	0	0	0	0	0	0	0	0	0	0	0	0	0	0	0	0	0	0	0	0	0	0	0	0	0	0	0	0	0	0	0	0	0	0
339	EHWGDLSKDYELSK	S7:+79.96633 - E1:+42.01056	b57.a1	gi|116628347|ref|YP_820966.1|STER_1623|Carbonic anhydrase [Streptococcus thermophilus LMD-9]_hit-name:cah _hit-score:498_hit-evalue:1e-143_identity-percent:93.0769230769231	1	0	0	1	0	0	0	0	0	0	0	0	0	0	0	0	0	0	0	0	0	0	0	0	0	0	0	0	0	0	0	0	0	0	0	0	0	0	0	0	0	0	0	0	0
340	KSQEVQWGYTGITGPEHWGDLSK	S2:+79.96633 - Y9:+79.96633	b57.a1	gi|116628347|ref|YP_820966.1|STER_1623|Carbonic anhydrase [Streptococcus thermophilus LMD-9]_hit-name:cah _hit-score:498_hit-evalue:1e-143_identity-percent:93.0769230769231	0	0	0	1	0	0	0	0	0	0	0	0	0	0	0	0	0	0	0	0	0	0	0	0	0	0	0	0	0	0	0	0	0	0	0	0	0	0	0	0	0	0	0	0	0
341	AKENENLESTEETVEEVVADKDTEQEQLNR	T10:+79.96633	b58.a1	gi|116627350|ref|YP_819969.1|STER_0492|Parvulin-like peptidyl-prolyl isomerase [Streptococcus thermophilus LMD-9]_hit-name:prtM _hit-score:506_hit-evalue:1e-145_identity-percent:89.0728476821192	0	0	0	1	0	0	0	0	0	0	0	0	0	0	0	0	0	0	0	1	0	0	0	0	0	0	0	0	0	0	0	0	0	0	0	0	0	0	0	0	0	0	0	0	0
342	AKENENLESTEETVEEVVADKDTEQEQLNR	S9:+79.96633	b58.a1	gi|116627350|ref|YP_819969.1|STER_0492|Parvulin-like peptidyl-prolyl isomerase [Streptococcus thermophilus LMD-9]_hit-name:prtM _hit-score:506_hit-evalue:1e-145_identity-percent:89.0728476821192	1	0	0	0	0	0	0	0	0	0	0	0	0	0	0	0	0	0	0	0	0	0	0	0	0	0	0	0	0	0	0	0	0	0	0	0	0	0	0	0	0	0	0	0	0
343	VTVEMSPYDLTR	Y8:+79.96633	b59.a1	gi|116628576|ref|YP_821195.1|STER_1885|infA|Translation initiation factor 1 [Streptococcus thermophilus LMD-9]_hit-name:tnp1239 _hit-score:26_hit-evalue:0.096_identity-percent:35.7142857142857	0	0	0	0	0	0	0	0	0	1	0	0	0	0	0	0	0	0	0	0	0	1	0	0	0	0	0	0	0	0	0	0	0	0	0	0	0	0	0	0	0	0	0	0	0
344	LTAPSVQFDETTGDYSR	T2:+79.96633	b60.a1	gi|116628639|ref|YP_821258.1|STER_1953|rpmF|Ribosomal protein L32 [Streptococcus thermophilus LMD-9]_hit-name:rpmF _hit-score:123_hit-evalue:6e-31_identity-percent:100	1	0	0	0	0	0	0	0	0	0	0	0	0	0	0	0	0	0	0	0	0	0	0	0	0	0	0	0	0	0	0	0	0	0	0	0	0	0	0	0	0	0	0	0	0
345	LTAPSVQFDETTGDYSR	T12:+79.96633	b60.a1	gi|116628639|ref|YP_821258.1|STER_1953|rpmF|Ribosomal protein L32 [Streptococcus thermophilus LMD-9]_hit-name:rpmF _hit-score:123_hit-evalue:6e-31_identity-percent:100	0	0	0	1	0	0	0	0	0	0	0	0	0	0	0	0	0	0	0	0	0	0	0	0	0	0	0	0	0	0	0	0	0	0	0	0	0	0	0	0	0	0	0	0	0
346	LTAPSVQFDETTGDYSR	S5:+79.96633	b60.a1	gi|116628639|ref|YP_821258.1|STER_1953|rpmF|Ribosomal protein L32 [Streptococcus thermophilus LMD-9]_hit-name:rpmF _hit-score:123_hit-evalue:6e-31_identity-percent:100	0	0	0	0	0	0	0	0	0	0	0	0	0	0	0	0	0	0	0	0	0	0	0	0	0	0	0	0	0	0	0	0	0	0	0	0	0	0	0	0	0	0	0	0	0
347	DYDSQIAATNNAISNLASQQEAAQAQVATIQSQVSTLR	S14:+79.96633 - D1:+42.01056	b61.a1	gi|116626992|ref|YP_819611.1|STER_0042|Surface antigen [Streptococcus thermophilus LMD-9]_hit-name:pcsB _hit-score:192_hit-evalue:7e-51_identity-percent:80.8695652173913	1	0	0	0	0	0	1	0	0	0	0	0	0	0	0	0	0	0	0	0	0	0	0	0	0	0	0	0	0	0	0	0	0	0	0	0	0	0	0	0	0	0	0	0	0
348	DYDSQIAATNNAISNLASQQEAAQAQVATIQSQVSTLR	S18:+79.96633 - D1:+42.01056	b61.a1	gi|116626992|ref|YP_819611.1|STER_0042|Surface antigen [Streptococcus thermophilus LMD-9]_hit-name:pcsB _hit-score:192_hit-evalue:7e-51_identity-percent:80.8695652173913	0	0	0	0	0	0	0	0	0	0	0	0	0	0	0	0	0	0	0	0	0	0	0	0	0	0	0	0	0	0	0	0	0	0	0	1	0	0	0	0	0	0	0	0	0
349	MTLASQIASDLLDIK	M1:+15.99491 - T2:+79.96633	b62.a1	gi|116627774|ref|YP_820393.1|STER_0981|pyrE|Orotate phosphoribosyltransferase [Streptococcus thermophilus LMD-9]_hit-name:pyrE _hit-score:408_hit-evalue:1e-116_identity-percent:99.5215311004785	0	0	0	0	0	0	0	0	0	0	0	0	0	0	0	0	0	0	0	0	0	0	0	0	0	0	0	0	0	0	0	0	0	1	0	0	1	0	0	0	0	0	0	0	0
350	DPENPLNQFNQAGGSNFFDDFFSDLNNFR	S15:+79.96633	b63.a1	gi|116627487|ref|YP_820106.1|STER_0648|ATP-binding subunit of Clp protease and DnaK/DnaJ chaperones [Streptococcus thermophilus LMD-9]_hit-name:clpE _hit-score:1377_hit-evalue:0.0_identity-percent:94.1489361702128	0	0	0	0	0	0	0	0	0	0	0	0	0	0	0	0	0	0	1	0	0	0	0	0	0	0	0	0	0	0	0	0	0	0	0	1	0	0	0	0	0	0	0	0	0
351	MFTFTNYVESK	M1:+15.99491 - T3:+79.96633 - M1:+42.01057	b64.a1	gi|116627803|ref|YP_820422.1|STER_1016|Glucan phosphorylase [Streptococcus thermophilus LMD-9]_hit-name:glgP _hit-score:1439_hit-evalue:0.0_identity-percent:95.8885941644562	0	0	0	0	0	0	0	0	0	0	0	0	0	0	0	0	0	0	0	0	1	0	0	1	0	0	0	0	0	0	0	0	0	0	1	0	0	0	0	0	0	0	0	0	0
352	GLPAQYGGFETFVDQLVSNR	Y6:+79.96633	b65.a1	gi|116628176|ref|YP_820795.1|STER_1437|Glycosyltransferase [Streptococcus thermophilus LMD-9]_hit-name:rgpA _hit-score:666_hit-evalue:0.0_identity-percent:81.9371727748691	1	0	0	0	0	1	0	0	0	0	0	0	0	0	0	0	0	0	0	0	0	0	0	0	0	0	0	0	0	0	0	0	1	0	0	0	0	0	0	0	0	0	0	0	0
353	INTQRQENGEAEFANPR	T3:+79.96633	b66.a1	gi|116628243|ref|YP_820862.1|STER_1513|ligA|NAD-dependent DNA ligase [Streptococcus thermophilus LMD-9]_hit-name:ligA _hit-score:1229_hit-evalue:0.0_identity-percent:97.5308641975309	0	0	0	0	0	0	0	0	0	0	0	0	0	0	0	0	0	0	1	0	0	0	0	0	0	0	0	0	0	0	0	0	0	0	0	0	0	0	0	0	0	0	0	0	0
354	YVPGQHGPNNR	Y1:+79.96633 - Y1:+42.01056	b67.a1	gi|116628655|ref|YP_821274.1|STER_1973|rpsD|Ribosomal protein S4 [Streptococcus thermophilus LMD-9]_hit-name:rpsD _hit-score:401_hit-evalue:1e-114_identity-percent:100	0	0	0	1	0	0	0	0	0	0	0	0	0	0	0	0	0	0	0	0	0	0	0	0	0	0	0	0	0	0	0	0	0	0	0	0	0	0	0	0	0	0	0	0	0
355	FLSNIINHHSDKVSVDA	S10:+79.96633	b68.a1	gi|116627887|ref|YP_820506.1|STER_1117|ABC-type polar amino acid transport system, ATPase component [Streptococcus thermophilus LMD-9]_hit-name:gnlQ _hit-score:266_hit-evalue:2e-73_identity-percent:54.9586776859504	0	0	0	0	0	0	0	0	0	0	0	0	0	0	0	0	0	0	0	0	0	0	0	1	0	0	0	0	0	0	0	0	0	0	0	0	0	0	0	0	0	0	0	0	0
356	SKPLLTDDVIEQAK	T6:+79.96633	b69.a1	gi|116627450|ref|YP_820069.1|STER_0605|hypothetical protein STER_0605 [Streptococcus thermophilus LMD-9]_NOHIT	0	0	0	0	0	0	0	0	0	0	0	0	0	0	0	0	0	0	0	1	0	0	1	0	0	0	0	0	0	0	0	0	0	0	0	0	0	0	0	0	0	0	0	0	0
357	SGNEDCTPLAVTISNDAANNK	C6:+57.02146 - T7:+79.96633	b70.a1	gi|116628232|ref|YP_820851.1|STER_1500|neopullulanase [Streptococcus thermophilus LMD-9]_hit-name:amyL _hit-score:1028_hit-evalue:0.0_identity-percent:100	0	0	0	0	0	0	0	0	0	0	0	0	0	0	0	0	0	0	0	0	0	0	1	0	0	0	0	0	0	0	0	0	0	1	0	0	0	0	0	0	0	0	0	0	0
358	SNYYQEPDYEDVNQLTEEGLPVYR	T16:+79.96633	b71.a1	gi|116627533|ref|YP_820152.1|STER_0698|Transcriptional regulator [Streptococcus thermophilus LMD-9]_hit-name:epsA _hit-score:57_hit-evalue:6e-10_identity-percent:27.6018099547511	0	0	0	1	0	0	0	0	0	0	0	0	0	0	0	0	0	0	0	0	0	0	0	0	0	0	0	0	0	0	0	0	0	0	0	0	0	0	0	0	0	0	0	0	0
359	INVNNYNDDAIQVLEGLDAVR	Y6:+79.96633 - I1:+42.01056	b72.a1	gi|116627477|ref|YP_820096.1|STER_0633|DNA topoisomerase IV subunit B [Streptococcus thermophilus LMD-9]_hit-name:parE _hit-score:1157_hit-evalue:0.0_identity-percent:90.9090909090909	0	0	0	0	0	0	0	0	0	0	0	0	0	0	0	0	0	0	0	0	0	0	0	0	1	0	0	0	0	0	0	0	0	0	0	1	0	0	0	0	0	0	0	0	0
360	VDAINQSNSGHPGVVMGAAPMGYTLFTRQ	M16:+15.99491 - M21:+15.99491 - Y23:+79.96633 - V1:+42.01056	b73.a1	gi|116627229|ref|YP_819848.1|STER_0349|Transketolase [Streptococcus thermophilus LMD-9]_hit-name:tkt _hit-score:1313_hit-evalue:0.0_identity-percent:99.6960486322188	0	0	0	0	0	0	0	0	0	0	0	0	0	0	0	0	0	0	0	0	0	0	0	0	0	0	0	0	0	0	0	0	0	0	1	0	0	0	0	0	0	0	0	0	0
361	VDAINQSNSGHPGVVMGAAPMGYTLFTRQ	M16:+15.99491 - M21:+15.99491 - T24:+79.96633 - V1:+42.01056	b73.a1	gi|116627229|ref|YP_819848.1|STER_0349|Transketolase [Streptococcus thermophilus LMD-9]_hit-name:tkt _hit-score:1313_hit-evalue:0.0_identity-percent:99.6960486322188	0	0	0	0	0	1	0	0	0	0	0	0	0	0	0	0	0	0	0	0	0	0	0	0	0	0	0	0	0	0	0	0	0	0	0	0	0	0	0	0	0	0	0	0	0
362	PYDGDESFLAGPTERSLK	S16:+79.96633 - P1:+42.01056	b74.a1	gi|116628346|ref|YP_820965.1|STER_1622|Pyruvate-formate lyase [Streptococcus thermophilus LMD-9]_hit-name:pfl _hit-score:1562_hit-evalue:0.0_identity-percent:100	0	0	0	0	0	0	0	0	0	0	0	0	0	0	0	0	0	0	0	0	0	0	0	0	0	0	0	0	0	0	0	0	1	0	0	0	0	0	0	0	0	0	0	0	0
363	ADGVNYIK	Y6:+79.96633	b75.a1	gi|116627675|ref|YP_820294.1|STER_0859|Uncharacterized ABC-type transport system, permease component [Streptococcus thermophilus LMD-9]_hit-name:livH _hit-score:45_hit-evalue:2e-06_identity-percent:26.8181818181818	1	0	0	0	0	0	0	0	0	0	0	0	0	0	0	0	0	0	0	0	0	0	0	0	0	0	0	0	0	0	0	0	0	0	0	0	0	0	0	0	0	0	0	0	0
364	VITPAPSTETAETVK	T8:+79.96633	b76.a1	gi|116627136|ref|YP_819755.1|STER_0243|Preprotein translocase subunit YajC [Streptococcus thermophilus LMD-9]_hit-name:yajC _hit-score:185_hit-evalue:2e-49_identity-percent:89.2857142857143	0	0	0	0	0	0	0	0	0	0	0	0	0	0	0	0	0	0	0	1	0	0	0	0	0	0	0	0	0	0	0	0	0	0	0	0	0	0	0	0	0	0	0	0	0
365	NEIASESYDEATDKYTSTTALQK	Y8:+79.96633	b77.a1	gi|116628571|ref|YP_821190.1|STER_1880|rplQ|Ribosomal protein L17 [Streptococcus thermophilus LMD-9]_hit-name:rplQ _hit-score:246_hit-evalue:7e-68_identity-percent:100	0	0	0	0	0	0	0	0	0	0	0	0	0	0	0	0	0	0	0	0	0	0	0	0	0	0	0	0	0	0	0	0	0	0	0	0	0	0	0	0	0	0	0	0	0
366	LRQTISQIMPSLHQGK	S6:+79.96633	b78.a1	gi|116627964|ref|YP_820583.1|STER_1197|cell division membrane protein [Streptococcus thermophilus LMD-9]_hit-name:rodA _hit-score:777_hit-evalue:0.0_identity-percent:86.1052631578947	0	0	0	0	0	0	0	0	0	0	0	0	0	0	0	0	0	0	0	1	0	0	0	0	0	0	0	0	0	0	0	0	0	0	0	0	0	0	0	0	0	0	0	0	0
367	MSTYAIIK	M1:+15.99491 - S2:+79.96633	b79.a1	gi|116627316|ref|YP_819935.1|STER_0455|rplU|Ribosomal protein L21 [Streptococcus thermophilus LMD-9]_hit-name:rplU _hit-score:172_hit-evalue:1e-45_identity-percent:86.5384615384615	0	0	0	1	0	0	0	0	0	0	0	0	0	0	0	0	0	0	0	0	0	0	0	0	0	0	0	0	0	0	0	0	0	0	0	0	0	0	0	0	0	0	0	0	0
368	LINTDNVASGVNVEVGKK	S9:+79.96633	b80.a1	gi|116628646|ref|YP_821265.1|STER_1962|hypothetical protein STER_1962 [Streptococcus thermophilus LMD-9]_hit-name:grpE _hit-score:24_hit-evalue:1.4_identity-percent:36.3636363636364	0	0	0	1	0	0	0	0	0	0	0	0	0	0	0	0	0	0	0	0	0	0	0	0	0	0	0	0	0	0	0	0	0	0	0	0	0	0	0	0	0	0	0	0	0
369	VLTPEEESGQISLSGK	S8:+79.96633	b81.a1	gi|116627233|ref|YP_819852.1|STER_0353|Predicted metal-binding, possibly nucleic acid-binding protein [Streptococcus thermophilus LMD-9]_hit-name:alaS _hit-score:26_hit-evalue:0.45_identity-percent:38.8888888888889	0	0	0	0	0	0	0	0	0	0	0	0	0	0	0	0	0	0	0	1	0	0	0	0	0	0	0	0	0	0	0	0	0	0	0	0	0	0	0	0	0	0	0	0	0
370	DLSQDQVQAVFDR	S3:+79.96633	b82.a1	gi|116628281|ref|YP_820900.1|STER_1552|trpD|Anthranilate phosphoribosyltransferase [Streptococcus thermophilus LMD-9]_hit-name:trpD _hit-score:640_hit-evalue:0.0_identity-percent:99.4011976047904	0	0	0	0	0	0	0	0	0	0	0	0	0	0	0	0	0	0	0	0	0	0	0	0	0	0	0	0	0	0	0	0	0	0	0	0	0	0	0	0	0	0	0	0	0
371	AWVRSFGVKATISNCSNNYGPYQHIEK	C15:+57.02146 - S5:+79.96633	b83.a1	gi|116627988|ref|YP_820607.1|STER_1222|dTDP-D-glucose 4,6-dehydratase [Streptococcus thermophilus LMD-9]_hit-name:rmlB _hit-score:720_hit-evalue:0.0_identity-percent:100	0	0	0	0	0	0	0	0	0	0	0	0	0	0	0	0	0	0	0	0	0	1	0	0	0	0	0	0	0	0	0	0	0	0	0	0	0	0	0	0	0	0	0	0	0
372	AINESDLGINPANDGSVIR	S16:+79.96633	b84.a1	gi|116627334|ref|YP_819953.1|STER_0475|frr|Ribosome recycling factor [Streptococcus thermophilus LMD-9]_hit-name:frr _hit-score:351_hit-evalue:5e-99_identity-percent:99.4594594594595	0	0	0	0	0	0	0	0	0	0	0	0	0	0	0	0	0	0	0	0	0	0	0	0	0	0	0	0	0	0	0	0	0	0	1	0	0	0	0	0	0	0	0	0	0
373	ATIGTVGNEQQSLINLGK	S12:+79.96633	b85.a1	gi|116628595|ref|YP_821214.1|STER_1904|rplB|Ribosomal protein L2 [Streptococcus thermophilus LMD-9]_hit-name:rplB _hit-score:557_hit-evalue:1e-161_identity-percent:100	0	0	0	0	0	0	0	0	0	0	0	0	0	0	0	0	0	0	0	0	0	0	0	0	0	0	0	0	0	0	0	0	0	0	0	0	0	0	0	0	0	0	0	0	0
374	SIGKGQDWTLTAEVVTKPEVK	S1:+79.96633	b86.a1	gi|116627090|ref|YP_819709.1|STER_0191|tig|FKBP-type peptidyl-prolyl cis-trans isomerase (trigger factor) [Streptococcus thermophilus LMD-9]_hit-name:tig _hit-score:737_hit-evalue:0.0_identity-percent:90.632318501171	0	0	0	1	0	0	0	0	0	0	0	0	0	0	0	0	0	0	0	0	0	0	0	0	0	0	0	0	0	0	0	0	0	0	0	0	0	0	0	0	0	0	0	0	0
375	DVLSVGQDVTVK	S4:+79.96633	b87.a1	gi|116627481|ref|YP_820100.1|STER_0639|rpsA|Ribosomal protein S1 [Streptococcus thermophilus LMD-9]_hit-name:rpsA _hit-score:694_hit-evalue:0.0_identity-percent:92	0	0	0	0	0	0	0	0	0	0	0	0	0	0	0	0	0	0	0	0	0	0	0	0	0	0	0	0	0	0	0	0	0	0	0	0	0	0	0	0	0	0	0	0	0
376	LVIGPCSSDNEKAVLDYAHR	C6:+57.02146 - S7:+79.96633 - S8:+79.96633	b88.a1	gi|116628423|ref|YP_821042.1|STER_1703|3-deoxy-D-arabino-heptulosonate 7-phosphate (DAHP) synthase [Streptococcus thermophilus LMD-9]_hit-name:aroG1 _hit-score:687_hit-evalue:0.0_identity-percent:99.7084548104956	0	0	0	0	0	0	0	0	0	0	0	0	0	0	0	0	0	0	0	0	0	0	0	0	0	0	0	0	0	0	0	0	0	0	0	0	0	0	0	0	0	0	0	0	0
377	GISEVVFDR	S3:+79.96633	b89.a1	gi|116628582|ref|YP_821201.1|STER_1891|rplR|Ribosomal protein L18 [Streptococcus thermophilus LMD-9]_hit-name:rplR _hit-score:227_hit-evalue:4e-62_identity-percent:98.3050847457627	0	0	0	0	0	0	0	0	0	0	0	0	0	0	0	0	0	0	0	0	0	0	0	0	0	0	0	0	0	0	0	0	0	1	0	0	0	0	0	0	0	0	0	0	0
378	TLNSAIANAENNFGLEK	S4:+79.96633	b90.a1	gi|116628593|ref|YP_821212.1|STER_1902|rplV|Ribosomal protein L22 [Streptococcus thermophilus LMD-9]_hit-name:rplV _hit-score:218_hit-evalue:3e-59_identity-percent:100	0	0	0	0	0	0	0	0	0	0	0	0	0	0	0	0	0	0	0	0	0	0	0	0	0	0	0	0	0	0	0	0	0	0	0	0	0	0	0	0	0	0	0	0	0
379	FNYSSVMAVPK	Y3:+79.96633	b91.a1	gi|116628586|ref|YP_821205.1|STER_1895|rplE|Ribosomal protein L5 [Streptococcus thermophilus LMD-9]_hit-name:rplE _hit-score:320_hit-evalue:9e-90_identity-percent:91.6666666666667	0	0	0	0	1	0	0	0	0	0	0	0	0	0	0	0	0	0	0	0	0	0	0	0	0	0	0	0	0	0	0	0	0	0	0	0	0	0	0	0	0	0	0	0	0
380	ALAAGGNAVMLGSMFAGTDEAPGETEIFQGR	S13:+79.96633 - T18:+79.96633	b92.a1	gi|116628674|ref|YP_821293.1|STER_1992|IMP dehydrogenase/GMP reductase [Streptococcus thermophilus LMD-9]_hit-name:guaB _hit-score:923_hit-evalue:0.0_identity-percent:96.551724137931	0	0	0	0	0	0	0	0	0	0	0	0	0	0	0	0	0	0	0	0	0	0	1	0	0	0	0	0	0	0	0	0	0	0	0	0	0	0	0	0	0	0	0	0	0
381	VFVQGKTGMGEYVVPFTARMK	M20:+15.99491 - T7:+79.96633 - Y12:+79.96633	b93.a1	gi|116628546|ref|YP_821165.1|STER_1844|DNA-directed RNA polymerase, beta' subunit/160 kD subunit [Streptococcus thermophilus LMD-9]_hit-name:rpoC _hit-score:2248_hit-evalue:0.0_identity-percent:96.1312026913373	0	0	0	0	0	0	0	0	0	0	0	0	0	0	0	0	1	0	0	0	0	0	0	0	0	0	0	0	0	0	0	0	0	0	0	0	0	0	0	0	0	0	0	0	0
382	EAGIIDLPSTLR	S9:+79.96633	b94.a1	gi|116628468|ref|YP_821087.1|STER_1751|Glutamine synthetase [Streptococcus thermophilus LMD-9]_hit-name:tnp1239 _hit-score:_hit-evalue:9.6_identity-percent:35.1351351351351	0	0	0	0	0	0	0	0	0	0	0	0	0	0	0	0	0	0	0	0	0	1	0	0	0	0	0	0	0	0	0	0	0	0	0	0	0	0	0	0	0	0	0	0	0
383	VQIDTPEEYQGSIIQALSER	S18:+79.96633	b95.a1	gi|116627599|ref|YP_820218.1|STER_0771|Predicted membrane GTPase involved in stress response [Streptococcus thermophilus LMD-9]_hit-name:typA _hit-score:1145_hit-evalue:0.0_identity-percent:95.7723577235772	1	0	0	0	0	0	0	0	0	0	0	0	0	0	0	0	0	0	0	0	0	0	0	0	0	0	0	0	0	0	0	0	0	0	0	0	0	0	0	0	0	0	0	0	0
384	VISIGGDGMLLSAFHMYEKELARVRFVGIHTGHLGF	M9:+15.99491 - S12:+79.96633 - Y17:+79.96633 - V1:+42.01056	b96.a1	gi|116628161|ref|YP_820780.1|STER_1422|ppnK|NAD kinase [Streptococcus thermophilus LMD-9]_hit-name:ppnK _hit-score:521_hit-evalue:1e-150_identity-percent:97.7611940298508	0	0	0	0	0	0	0	0	0	0	0	0	0	0	0	0	0	0	0	0	0	0	0	0	1	0	0	0	0	0	0	0	0	0	0	0	0	0	0	0	0	0	0	0	0
385	KNLTLLGSKETPYIFEYSPQVLESFDNR	S8:+79.96633 - T11:+79.96633	b97.a1	gi|116627686|ref|YP_820305.1|STER_0872|Enzyme related to GTP cyclohydrolase I [Streptococcus thermophilus LMD-9]_hit-name:punA _hit-score:24_hit-evalue:1.5_identity-percent:29.7872340425532	0	0	0	0	0	0	0	0	0	0	0	0	0	0	0	0	0	0	0	0	0	0	0	0	0	0	0	0	0	0	0	0	0	0	0	0	0	0	0	0	0	0	0	0	0
386	LTEATKLNDLGVDSIELMEFIINLEDEFSLE	T2:+79.96633	b98.a1	gi|116626997|ref|YP_819616.1|STER_0048|Acyl carrier protein [Streptococcus thermophilus LMD-9]_hit-name:acpP1 _hit-score:154_hit-evalue:2e-40_identity-percent:98.7654320987654	0	0	0	0	0	1	0	0	0	0	0	0	0	0	0	0	0	0	0	0	0	0	0	0	0	0	0	0	0	0	0	0	0	0	0	0	0	0	0	0	0	0	0	0	0
387	NQTSSVTTSPVAPTVEVVASSPQVPVAPVAAPAAV	S20:+79.96633 - S21:+79.96633 - T14:+79.96633	b99.a1	gi|116627300|ref|YP_819919.1|STER_0435|Biotin carboxyl carrier protein [Streptococcus thermophilus LMD-9]_hit-name:accB _hit-score:211_hit-evalue:4e-57_identity-percent:72.8395061728395	0	0	0	0	0	0	0	0	0	0	0	0	0	0	0	0	0	0	0	0	0	0	0	0	0	0	0	0	0	0	0	0	0	0	0	0	0	0	0	0	0	0	0	0	0
388	DTAYQVIERIAYSYANGDAMLPSIDR	M20:+15.99491 - S13:+79.96633	c100.a1	gi|116627957|ref|YP_820576.1|STER_1190|Adenine/guanine|reversed phosphoribosyltransferase or related PRPP-binding protein [Streptococcus thermophilus LMD-9]_hit-name:apt _hit-score:346_hit-evalue:1e-97_identity-percent:100	0	0	0	0	0	0	0	0	0	0	0	0	0	0	0	0	0	0	1	0	0	0	0	0	0	0	0	0	0	0	0	0	0	0	0	0	0	0	0	0	0	0	0	0	0
389	SHQDEVEAPEGITFEVPSATSIVVSGINK	T20:+79.96633	c101.a1	gi|116628583|ref|YP_821202.1|STER_1892|rplF|Ribosomal protein L6P/L9E [Streptococcus thermophilus LMD-9]_hit-name:rplF _hit-score:353_hit-evalue:1e-99_identity-percent:100	0	0	0	1	0	0	0	0	0	0	0	0	0	0	0	0	0	0	0	0	0	0	0	0	0	0	0	0	0	0	0	0	0	0	0	0	0	0	0	0	0	0	0	0	0
390	VISTLTTGATLQEFLVPTETGALK	T7:+79.96633	c102.a1	gi|116628118|ref|YP_820737.1|STER_1368|aldose 1-epimerase [Streptococcus thermophilus LMD-9]_hit-name:galM _hit-score:707_hit-evalue:0.0_identity-percent:100	0	0	0	0	0	0	0	0	0	0	0	0	0	0	0	0	0	0	0	0	0	0	0	0	0	0	0	0	0	0	0	0	1	0	0	0	0	0	0	0	0	0	0	0	0
391	TKNFGGLTAVGDVSMELNEGELVGLIGPNGAGK	T1:+79.96633 - T1:+42.01056	c103.a1	gi|116627277|ref|YP_819896.1|STER_0401|ABC-type branched-chain amino acid transport system, ATPase component [Streptococcus thermophilus LMD-9]_hit-name:livG _hit-score:488_hit-evalue:1e-140_identity-percent:99.2125984251969	0	0	0	0	0	0	0	0	0	0	0	0	0	0	0	0	0	0	1	0	0	0	0	0	0	0	0	0	0	0	0	0	0	0	0	0	0	0	0	0	0	0	0	0	0
392	AVTCSDSSGFVYDPDGIDVDLLK	C4:+57.02146 - S8:+79.96633	c104.a1	gi|116627327|ref|YP_819946.1|STER_0467|Glutamate dehydrogenase/leucine dehydrogenase [Streptococcus thermophilus LMD-9]_hit-name:gdhA _hit-score:893_hit-evalue:0.0_identity-percent:100	1	0	0	0	0	0	0	0	0	0	0	0	0	0	0	0	0	0	0	0	0	0	0	0	0	0	0	0	0	0	0	0	0	0	0	0	0	0	0	0	0	0	0	0	0
393	MNIYDQLQAVEDRYEELGELLSDPEVVSDTK	Y14:+79.96633	c105.a1	gi|116627620|ref|YP_820239.1|STER_0793|prfA|Protein chain release factor A [Streptococcus thermophilus LMD-9]_hit-name:prfA _hit-score:653_hit-evalue:0.0_identity-percent:94.4289693593315	0	0	0	0	0	0	0	0	0	0	0	0	0	0	0	0	0	0	1	0	0	0	0	0	0	0	0	0	0	0	0	0	0	0	0	0	0	0	0	0	0	0	0	0	0
394	VQTIDPLFVAVADLSESVSDLNTR	S15:+79.96633	c106.a1	gi|116627554|ref|YP_820173.1|STER_0721|Uncharacterized protein containing a divergent version of the methyl-accepting chemotaxis-like domain [Streptococcus thermophilus LMD-9]_hit-name:pepB _hit-score:22_hit-evalue:4.0_identity-percent:28.5714285714286	1	0	0	0	0	0	0	0	0	0	0	0	0	0	0	0	0	0	0	0	0	0	0	0	0	0	0	0	0	0	0	0	0	0	0	0	0	0	0	0	0	0	0	0	0
[truncated: 19 more columns]

## Sheet: compare.phosphopeptides.by.sample
	Supporting information Table S3.Spectral counting of phosphopeptides present each of the 8 samples
	Filter list proteins: proteins filtered from original list of X!TandemPipeline. Here we conserved only phosphopeptides with a maximum peptide Evalue = O.001
	338 phosphopeptides
Informations Table
Num pep	number of the peptide
sequence	phosphopeptide sequence
liste.modifs	localization of phosphosite
Sub-group ID	name of the sub group
Top phosphoisland protein	name of the protein phosphorylated
numpep	sequence	liste.modifs	Sub-group ID	Top PhosphoIsland protein	Mut.T1.inter	Mut.T2.heavy	Mut.T3.inter	Mut.T4.heavy	WT.T1.heavy	WT.T2.inter	WT.T3.heavy	WT.T4.inter
1	YGSYGSYGSYGEYGKK	Y7:+79.96633	a1.a1	gi|116627844|ref|YP_820463.1|STER_1068|Tyrosine-protein kinase (capsular polysaccharide biosynthesis) [Streptococcus thermophilus LMD-9]_hit-name:epsD _hit-score:422_hit-evalue:1e-120_identity-percent:90.2439024390244	1	1	0	0	0	1	0	0
2	YGSYGSYGSYGEYGKK	Y13:+79.96633	a1.a1	gi|116627844|ref|YP_820463.1|STER_1068|Tyrosine-protein kinase (capsular polysaccharide biosynthesis) [Streptococcus thermophilus LMD-9]_hit-name:epsD _hit-score:422_hit-evalue:1e-120_identity-percent:90.2439024390244	3	2	7	4	2	3	4	7
3	YGSYGSYGSYGEYGKK	S9:+79.96633	a1.a1	gi|116627844|ref|YP_820463.1|STER_1068|Tyrosine-protein kinase (capsular polysaccharide biosynthesis) [Streptococcus thermophilus LMD-9]_hit-name:epsD _hit-score:422_hit-evalue:1e-120_identity-percent:90.2439024390244	0	1	0	1	2	0	0	0
4	YGSYGSYGSYGEYGKK	Y10:+79.96633	a1.a1	gi|116627844|ref|YP_820463.1|STER_1068|Tyrosine-protein kinase (capsular polysaccharide biosynthesis) [Streptococcus thermophilus LMD-9]_hit-name:epsD _hit-score:422_hit-evalue:1e-120_identity-percent:90.2439024390244	1	1	2	3	1	1	4	4
5	YGSYGSYGSYGEYGKK	S6:+79.96633	a1.a1	gi|116627844|ref|YP_820463.1|STER_1068|Tyrosine-protein kinase (capsular polysaccharide biosynthesis) [Streptococcus thermophilus LMD-9]_hit-name:epsD _hit-score:422_hit-evalue:1e-120_identity-percent:90.2439024390244	1	0	0	0	0	0	0	0
6	YGSYGSYGSYGEYGKK	Y4:+79.96633 - Y13:+79.96633	a1.a1	gi|116627844|ref|YP_820463.1|STER_1068|Tyrosine-protein kinase (capsular polysaccharide biosynthesis) [Streptococcus thermophilus LMD-9]_hit-name:epsD _hit-score:422_hit-evalue:1e-120_identity-percent:90.2439024390244	0	0	1	0	0	0	1	0
7	YGSYGSYGSYGEYGKK	Y7:+79.96633 - Y13:+79.96633	a1.a1	gi|116627844|ref|YP_820463.1|STER_1068|Tyrosine-protein kinase (capsular polysaccharide biosynthesis) [Streptococcus thermophilus LMD-9]_hit-name:epsD _hit-score:422_hit-evalue:1e-120_identity-percent:90.2439024390244	1	2	2	0	0	3	0	1
8	YGSYGSYGSYGEYGKK	S9:+79.96633 - Y7:+79.96633	a1.a1	gi|116627844|ref|YP_820463.1|STER_1068|Tyrosine-protein kinase (capsular polysaccharide biosynthesis) [Streptococcus thermophilus LMD-9]_hit-name:epsD _hit-score:422_hit-evalue:1e-120_identity-percent:90.2439024390244	0	0	0	0	0	0	2	0
9	YGSYGSYGSYGEYGKK	S9:+79.96633 - Y13:+79.96633	a1.a1	gi|116627844|ref|YP_820463.1|STER_1068|Tyrosine-protein kinase (capsular polysaccharide biosynthesis) [Streptococcus thermophilus LMD-9]_hit-name:epsD _hit-score:422_hit-evalue:1e-120_identity-percent:90.2439024390244	1	0	0	0	1	0	0	0
10	YGSYGSYGSYGEYGKK	Y4:+79.96633 - Y10:+79.96633	a1.a1	gi|116627844|ref|YP_820463.1|STER_1068|Tyrosine-protein kinase (capsular polysaccharide biosynthesis) [Streptococcus thermophilus LMD-9]_hit-name:epsD _hit-score:422_hit-evalue:1e-120_identity-percent:90.2439024390244	0	0	0	0	0	1	0	0
11	YGSYGSYGSYGEYGKK	Y10:+79.96633 - Y13:+79.96633	a1.a1	gi|116627844|ref|YP_820463.1|STER_1068|Tyrosine-protein kinase (capsular polysaccharide biosynthesis) [Streptococcus thermophilus LMD-9]_hit-name:epsD _hit-score:422_hit-evalue:1e-120_identity-percent:90.2439024390244	0	0	0	0	1	0	0	0
12	YGSYGSYGSYGEYGK	Y13:+79.96633	a1.a1	gi|116627844|ref|YP_820463.1|STER_1068|Tyrosine-protein kinase (capsular polysaccharide biosynthesis) [Streptococcus thermophilus LMD-9]_hit-name:epsD _hit-score:422_hit-evalue:1e-120_identity-percent:90.2439024390244	2	3	3	1	3	1	2	0
13	YGSYGSYGSYGEYGK	Y10:+79.96633	a1.a1	gi|116627844|ref|YP_820463.1|STER_1068|Tyrosine-protein kinase (capsular polysaccharide biosynthesis) [Streptococcus thermophilus LMD-9]_hit-name:epsD _hit-score:422_hit-evalue:1e-120_identity-percent:90.2439024390244	4	2	1	1	3	1	2	4
14	YGSYGSYGSYGEYGK	S9:+79.96633	a1.a1	gi|116627844|ref|YP_820463.1|STER_1068|Tyrosine-protein kinase (capsular polysaccharide biosynthesis) [Streptococcus thermophilus LMD-9]_hit-name:epsD _hit-score:422_hit-evalue:1e-120_identity-percent:90.2439024390244	0	0	0	1	0	1	0	1
15	YGSYGSYGSYGEYGK	Y1:+79.96633	a1.a1	gi|116627844|ref|YP_820463.1|STER_1068|Tyrosine-protein kinase (capsular polysaccharide biosynthesis) [Streptococcus thermophilus LMD-9]_hit-name:epsD _hit-score:422_hit-evalue:1e-120_identity-percent:90.2439024390244	0	1	0	0	1	0	1	0
16	YGSYGSYGSYGEYGK	Y7:+79.96633	a1.a1	gi|116627844|ref|YP_820463.1|STER_1068|Tyrosine-protein kinase (capsular polysaccharide biosynthesis) [Streptococcus thermophilus LMD-9]_hit-name:epsD _hit-score:422_hit-evalue:1e-120_identity-percent:90.2439024390244	0	1	0	0	0	0	0	0
17	YGSYGSYGSYGEYGK	S6:+79.96633	a1.a1	gi|116627844|ref|YP_820463.1|STER_1068|Tyrosine-protein kinase (capsular polysaccharide biosynthesis) [Streptococcus thermophilus LMD-9]_hit-name:epsD _hit-score:422_hit-evalue:1e-120_identity-percent:90.2439024390244	2	0	0	0	0	0	0	0
18	YGSYGSYGSYGEYGK	Y4:+79.96633	a1.a1	gi|116627844|ref|YP_820463.1|STER_1068|Tyrosine-protein kinase (capsular polysaccharide biosynthesis) [Streptococcus thermophilus LMD-9]_hit-name:epsD _hit-score:422_hit-evalue:1e-120_identity-percent:90.2439024390244	0	0	0	0	0	2	0	0
19	VDMTVDKYGSYGSYGSYGEYGKK	S13:+79.96633	a1.a1	gi|116627844|ref|YP_820463.1|STER_1068|Tyrosine-protein kinase (capsular polysaccharide biosynthesis) [Streptococcus thermophilus LMD-9]_hit-name:epsD _hit-score:422_hit-evalue:1e-120_identity-percent:90.2439024390244	1	0	0	0	0	0	0	0
20	VDMTVDKYGSYGSYGSYGEYGKK	S16:+79.96633	a1.a1	gi|116627844|ref|YP_820463.1|STER_1068|Tyrosine-protein kinase (capsular polysaccharide biosynthesis) [Streptococcus thermophilus LMD-9]_hit-name:epsD _hit-score:422_hit-evalue:1e-120_identity-percent:90.2439024390244	0	0	2	1	0	0	0	0
21	VDMTVDKYGSYGSYGSYGEYGKK	Y20:+79.96633	a1.a1	gi|116627844|ref|YP_820463.1|STER_1068|Tyrosine-protein kinase (capsular polysaccharide biosynthesis) [Streptococcus thermophilus LMD-9]_hit-name:epsD _hit-score:422_hit-evalue:1e-120_identity-percent:90.2439024390244	1	0	1	2	0	0	2	0
22	VDMTVDKYGSYGSYGSYGEYGKK	Y14:+79.96633	a1.a1	gi|116627844|ref|YP_820463.1|STER_1068|Tyrosine-protein kinase (capsular polysaccharide biosynthesis) [Streptococcus thermophilus LMD-9]_hit-name:epsD _hit-score:422_hit-evalue:1e-120_identity-percent:90.2439024390244	0	0	0	0	0	0	0	1
23	VDMTVDKYGSYGSYGSYGEYGKK	S10:+79.96633 - Y20:+79.96633	a1.a1	gi|116627844|ref|YP_820463.1|STER_1068|Tyrosine-protein kinase (capsular polysaccharide biosynthesis) [Streptococcus thermophilus LMD-9]_hit-name:epsD _hit-score:422_hit-evalue:1e-120_identity-percent:90.2439024390244	0	0	0	0	0	0	0	1
24	VDMTVDKYGSYGSYGSYGEYGKK	Y8:+79.96633 - Y20:+79.96633	a1.a1	gi|116627844|ref|YP_820463.1|STER_1068|Tyrosine-protein kinase (capsular polysaccharide biosynthesis) [Streptococcus thermophilus LMD-9]_hit-name:epsD _hit-score:422_hit-evalue:1e-120_identity-percent:90.2439024390244	1	0	0	0	1	0	0	0
25	VDMTVDKYGSYGSYGSYGEYGKK	Y11:+79.96633 - Y17:+79.96633	a1.a1	gi|116627844|ref|YP_820463.1|STER_1068|Tyrosine-protein kinase (capsular polysaccharide biosynthesis) [Streptococcus thermophilus LMD-9]_hit-name:epsD _hit-score:422_hit-evalue:1e-120_identity-percent:90.2439024390244	0	0	0	0	0	0	0	1
26	YGSYGSYGSYGEYGK	Y4:+79.96633 - Y13:+79.96633	a1.a1	gi|116627844|ref|YP_820463.1|STER_1068|Tyrosine-protein kinase (capsular polysaccharide biosynthesis) [Streptococcus thermophilus LMD-9]_hit-name:epsD _hit-score:422_hit-evalue:1e-120_identity-percent:90.2439024390244	0	1	0	1	1	1	0	0
27	YGSYGSYGSYGEYGK	S6:+79.96633 - Y10:+79.96633	a1.a1	gi|116627844|ref|YP_820463.1|STER_1068|Tyrosine-protein kinase (capsular polysaccharide biosynthesis) [Streptococcus thermophilus LMD-9]_hit-name:epsD _hit-score:422_hit-evalue:1e-120_identity-percent:90.2439024390244	0	1	0	0	2	0	0	1
28	YGSYGSYGSYGEYGK	Y7:+79.96633 - Y10:+79.96633	a1.a1	gi|116627844|ref|YP_820463.1|STER_1068|Tyrosine-protein kinase (capsular polysaccharide biosynthesis) [Streptococcus thermophilus LMD-9]_hit-name:epsD _hit-score:422_hit-evalue:1e-120_identity-percent:90.2439024390244	0	1	0	0	0	1	1	0
29	YGSYGSYGSYGEYGK	S6:+79.96633 - Y13:+79.96633	a1.a1	gi|116627844|ref|YP_820463.1|STER_1068|Tyrosine-protein kinase (capsular polysaccharide biosynthesis) [Streptococcus thermophilus LMD-9]_hit-name:epsD _hit-score:422_hit-evalue:1e-120_identity-percent:90.2439024390244	0	0	1	0	0	0	0	0
30	YGSYGSYGSYGEYGK	Y7:+79.96633 - Y13:+79.96633	a1.a1	gi|116627844|ref|YP_820463.1|STER_1068|Tyrosine-protein kinase (capsular polysaccharide biosynthesis) [Streptococcus thermophilus LMD-9]_hit-name:epsD _hit-score:422_hit-evalue:1e-120_identity-percent:90.2439024390244	0	0	1	0	0	0	0	1
31	VDMTVDKYGSYGSYGSYGEYGKK	Y8:+79.96633 - Y11:+79.96633 - Y20:+79.96633	a1.a1	gi|116627844|ref|YP_820463.1|STER_1068|Tyrosine-protein kinase (capsular polysaccharide biosynthesis) [Streptococcus thermophilus LMD-9]_hit-name:epsD _hit-score:422_hit-evalue:1e-120_identity-percent:90.2439024390244	0	0	1	0	0	0	0	0
32	VDMTVDKYGSYGSYGSYGEYGKK	S13:+79.96633 - Y17:+79.96633 - Y20:+79.96633	a1.a1	gi|116627844|ref|YP_820463.1|STER_1068|Tyrosine-protein kinase (capsular polysaccharide biosynthesis) [Streptococcus thermophilus LMD-9]_hit-name:epsD _hit-score:422_hit-evalue:1e-120_identity-percent:90.2439024390244	1	0	0	0	0	0	0	0
33	VDMTVDKYGSYGSYGSYGEYGKK	S10:+79.96633 - Y11:+79.96633 - Y20:+79.96633	a1.a1	gi|116627844|ref|YP_820463.1|STER_1068|Tyrosine-protein kinase (capsular polysaccharide biosynthesis) [Streptococcus thermophilus LMD-9]_hit-name:epsD _hit-score:422_hit-evalue:1e-120_identity-percent:90.2439024390244	0	0	1	0	0	0	0	0
34	VDMTVDKYGSYGSYGSYGEYGKK	T4:+79.96633 - Y14:+79.96633 - Y20:+79.96633	a1.a1	gi|116627844|ref|YP_820463.1|STER_1068|Tyrosine-protein kinase (capsular polysaccharide biosynthesis) [Streptococcus thermophilus LMD-9]_hit-name:epsD _hit-score:422_hit-evalue:1e-120_identity-percent:90.2439024390244	1	0	0	0	0	0	0	0
35	VDMTVDKYGSYGSYGSYGEYGKK	S16:+79.96633 - Y14:+79.96633 - Y20:+79.96633	a1.a1	gi|116627844|ref|YP_820463.1|STER_1068|Tyrosine-protein kinase (capsular polysaccharide biosynthesis) [Streptococcus thermophilus LMD-9]_hit-name:epsD _hit-score:422_hit-evalue:1e-120_identity-percent:90.2439024390244	0	0	0	0	0	0	0	1
36	VDMTVDKYGSYGSYGSYGEYGKK	S10:+79.96633 - Y8:+79.96633 - Y20:+79.96633	a1.a1	gi|116627844|ref|YP_820463.1|STER_1068|Tyrosine-protein kinase (capsular polysaccharide biosynthesis) [Streptococcus thermophilus LMD-9]_hit-name:epsD _hit-score:422_hit-evalue:1e-120_identity-percent:90.2439024390244	0	0	0	0	0	0	0	1
37	VDMTVDKYGSYGSYGSYGEYGK	Y14:+79.96633	a1.a1	gi|116627844|ref|YP_820463.1|STER_1068|Tyrosine-protein kinase (capsular polysaccharide biosynthesis) [Streptococcus thermophilus LMD-9]_hit-name:epsD _hit-score:422_hit-evalue:1e-120_identity-percent:90.2439024390244	1	1	0	0	0	1	0	0
38	VDMTVDKYGSYGSYGSYGEYGK	S16:+79.96633	a1.a1	gi|116627844|ref|YP_820463.1|STER_1068|Tyrosine-protein kinase (capsular polysaccharide biosynthesis) [Streptococcus thermophilus LMD-9]_hit-name:epsD _hit-score:422_hit-evalue:1e-120_identity-percent:90.2439024390244	0	0	2	1	0	0	1	1
39	VDMTVDKYGSYGSYGSYGEYGK	S10:+79.96633	a1.a1	gi|116627844|ref|YP_820463.1|STER_1068|Tyrosine-protein kinase (capsular polysaccharide biosynthesis) [Streptococcus thermophilus LMD-9]_hit-name:epsD _hit-score:422_hit-evalue:1e-120_identity-percent:90.2439024390244	0	0	0	0	0	0	0	1
40	VDMTVDKYGSYGSYGSYGEYGK	Y20:+79.96633	a1.a1	gi|116627844|ref|YP_820463.1|STER_1068|Tyrosine-protein kinase (capsular polysaccharide biosynthesis) [Streptococcus thermophilus LMD-9]_hit-name:epsD _hit-score:422_hit-evalue:1e-120_identity-percent:90.2439024390244	0	0	1	0	0	0	0	0
41	VDMTVDKYGSYGSYGSYGEYGK	Y17:+79.96633	a1.a1	gi|116627844|ref|YP_820463.1|STER_1068|Tyrosine-protein kinase (capsular polysaccharide biosynthesis) [Streptococcus thermophilus LMD-9]_hit-name:epsD _hit-score:422_hit-evalue:1e-120_identity-percent:90.2439024390244	0	0	0	0	0	0	0	1
42	VDMTVDKYGSYGSYGSYGEYGK	Y11:+79.96633	a1.a1	gi|116627844|ref|YP_820463.1|STER_1068|Tyrosine-protein kinase (capsular polysaccharide biosynthesis) [Streptococcus thermophilus LMD-9]_hit-name:epsD _hit-score:422_hit-evalue:1e-120_identity-percent:90.2439024390244	0	0	0	0	1	0	0	0
43	VDMTVDKYGSYGSYGSYGEYGK	S13:+79.96633 - Y8:+79.96633	a1.a1	gi|116627844|ref|YP_820463.1|STER_1068|Tyrosine-protein kinase (capsular polysaccharide biosynthesis) [Streptococcus thermophilus LMD-9]_hit-name:epsD _hit-score:422_hit-evalue:1e-120_identity-percent:90.2439024390244	0	0	1	0	0	0	0	0
44	VDMTVDKYGSYGSYGSYGEYGK	S10:+79.96633 - S16:+79.96633	a1.a1	gi|116627844|ref|YP_820463.1|STER_1068|Tyrosine-protein kinase (capsular polysaccharide biosynthesis) [Streptococcus thermophilus LMD-9]_hit-name:epsD _hit-score:422_hit-evalue:1e-120_identity-percent:90.2439024390244	1	0	0	0	0	0	0	0
45	VDMTVDKYGSYGSYGSYGEYGK	S13:+79.96633 - Y17:+79.96633	a1.a1	gi|116627844|ref|YP_820463.1|STER_1068|Tyrosine-protein kinase (capsular polysaccharide biosynthesis) [Streptococcus thermophilus LMD-9]_hit-name:epsD _hit-score:422_hit-evalue:1e-120_identity-percent:90.2439024390244	1	0	0	0	0	0	0	0
46	VDMTVDKYGSYGSYGSYGEYGKK	Y17:+79.96633	a1.a1	gi|116627844|ref|YP_820463.1|STER_1068|Tyrosine-protein kinase (capsular polysaccharide biosynthesis) [Streptococcus thermophilus LMD-9]_hit-name:epsD _hit-score:422_hit-evalue:1e-120_identity-percent:90.2439024390244	0	1	0	0	0	0	2	0
47	VDMTVDKYGSYGSYGSYGEYGKK	S10:+79.96633	a1.a1	gi|116627844|ref|YP_820463.1|STER_1068|Tyrosine-protein kinase (capsular polysaccharide biosynthesis) [Streptococcus thermophilus LMD-9]_hit-name:epsD _hit-score:422_hit-evalue:1e-120_identity-percent:90.2439024390244	0	0	0	0	1	0	0	0
48	VDMTVDKYGSYGSYGSYGEYGKK	Y8:+79.96633	a1.a1	gi|116627844|ref|YP_820463.1|STER_1068|Tyrosine-protein kinase (capsular polysaccharide biosynthesis) [Streptococcus thermophilus LMD-9]_hit-name:epsD _hit-score:422_hit-evalue:1e-120_identity-percent:90.2439024390244	0	1	0	0	0	0	0	0
49	VDMTVDKYGSYGSYGSYGEYGKK	S16:+79.96633 - Y20:+79.96633	a1.a1	gi|116627844|ref|YP_820463.1|STER_1068|Tyrosine-protein kinase (capsular polysaccharide biosynthesis) [Streptococcus thermophilus LMD-9]_hit-name:epsD _hit-score:422_hit-evalue:1e-120_identity-percent:90.2439024390244	0	0	2	0	0	0	0	1
50	VDMTVDKYGSYGSYGSYGEYGK	S16:+79.96633 - Y8:+79.96633	a1.a1	gi|116627844|ref|YP_820463.1|STER_1068|Tyrosine-protein kinase (capsular polysaccharide biosynthesis) [Streptococcus thermophilus LMD-9]_hit-name:epsD _hit-score:422_hit-evalue:1e-120_identity-percent:90.2439024390244	0	0	0	0	0	0	1	0
51	VDMTVDKYGSYGSYGSYGEYGK	T4:+79.96633 - Y14:+79.96633	a1.a1	gi|116627844|ref|YP_820463.1|STER_1068|Tyrosine-protein kinase (capsular polysaccharide biosynthesis) [Streptococcus thermophilus LMD-9]_hit-name:epsD _hit-score:422_hit-evalue:1e-120_identity-percent:90.2439024390244	0	1	0	0	0	0	0	0
52	VDMTVDKYGSYGSYGSYGEYGK	S10:+79.96633 - Y14:+79.96633	a1.a1	gi|116627844|ref|YP_820463.1|STER_1068|Tyrosine-protein kinase (capsular polysaccharide biosynthesis) [Streptococcus thermophilus LMD-9]_hit-name:epsD _hit-score:422_hit-evalue:1e-120_identity-percent:90.2439024390244	0	0	0	0	0	0	1	0
53	YGSYGSYGSYGEYGKKSDQK	S9:+79.96633 - Y13:+79.96633	a1.a1	gi|116627844|ref|YP_820463.1|STER_1068|Tyrosine-protein kinase (capsular polysaccharide biosynthesis) [Streptococcus thermophilus LMD-9]_hit-name:epsD _hit-score:422_hit-evalue:1e-120_identity-percent:90.2439024390244	0	0	0	0	0	0	1	0
54	VDMTVDKYGSYGSYGSYGEYGK	M3:+15.99491 - Y8:+79.96633 - Y20:+79.96633	a1.a1	gi|116627844|ref|YP_820463.1|STER_1068|Tyrosine-protein kinase (capsular polysaccharide biosynthesis) [Streptococcus thermophilus LMD-9]_hit-name:epsD _hit-score:422_hit-evalue:1e-120_identity-percent:90.2439024390244	0	0	1	0	0	0	0	0
55	NLNETQTFK	T5:+79.96633	a2.a1	gi|116627610|ref|YP_820229.1|STER_0782|Cell division initiation protein [Streptococcus thermophilus LMD-9]_hit-name:divIVA _hit-score:550_hit-evalue:1e-158_identity-percent:98.2817869415807	0	0	0	0	4	7	5	11
56	NLNETQTFKLNISE	T5:+79.96633	a2.a1	gi|116627610|ref|YP_820229.1|STER_0782|Cell division initiation protein [Streptococcus thermophilus LMD-9]_hit-name:divIVA _hit-score:550_hit-evalue:1e-158_identity-percent:98.2817869415807	0	0	0	0	3	5	6	9
57	VLDEHVPDSNDAASFDATR	S9:+79.96633	a2.a2	gi|116627610|ref|YP_820229.1|STER_0782|Cell division initiation protein [Streptococcus thermophilus LMD-9]_hit-name:divIVA _hit-score:550_hit-evalue:1e-158_identity-percent:98.2817869415807	0	0	0	0	1	0	0	0
58	VLDEHVPDSNDAASFDATRQFTPDEMAELQR	T18:+79.96633	a2.a2	gi|116627610|ref|YP_820229.1|STER_0782|Cell division initiation protein [Streptococcus thermophilus LMD-9]_hit-name:divIVA _hit-score:550_hit-evalue:1e-158_identity-percent:98.2817869415807	0	0	0	0	0	0	1	0
59	VLDEHVPDSNDAASFDATR	T18:+79.96633	a2.a2	gi|116627610|ref|YP_820229.1|STER_0782|Cell division initiation protein [Streptococcus thermophilus LMD-9]_hit-name:divIVA _hit-score:550_hit-evalue:1e-158_identity-percent:98.2817869415807	0	0	0	0	4	4	6	1
60	VLDEHVPDSNDAASFDATR	S14:+79.96633	a2.a2	gi|116627610|ref|YP_820229.1|STER_0782|Cell division initiation protein [Streptococcus thermophilus LMD-9]_hit-name:divIVA _hit-score:550_hit-evalue:1e-158_identity-percent:98.2817869415807	0	0	0	0	5	3	2	4
61	VLDEHVPDSNDAASFDATRQFTPDEMAELQR	M26:+15.99491 - S9:+79.96633	a2.a2	gi|116627610|ref|YP_820229.1|STER_0782|Cell division initiation protein [Streptococcus thermophilus LMD-9]_hit-name:divIVA _hit-score:550_hit-evalue:1e-158_identity-percent:98.2817869415807	0	0	0	0	0	0	0	1
62	QFTPDEMAELQR	T3:+79.96633	a2.a2	gi|116627610|ref|YP_820229.1|STER_0782|Cell division initiation protein [Streptococcus thermophilus LMD-9]_hit-name:divIVA _hit-score:550_hit-evalue:1e-158_identity-percent:98.2817869415807	0	0	0	0	0	0	0	2
63	VLDEHVPDSNDAASFDATRQFTPDEMAELQR	M26:+15.99491 - T18:+79.96633	a2.a2	gi|116627610|ref|YP_820229.1|STER_0782|Cell division initiation protein [Streptococcus thermophilus LMD-9]_hit-name:divIVA _hit-score:550_hit-evalue:1e-158_identity-percent:98.2817869415807	0	0	0	0	1	0	0	0
64	VLDEHVPDSNDAASFDATRQFTPDEMAELQR	T22:+79.96633	a2.a2	gi|116627610|ref|YP_820229.1|STER_0782|Cell division initiation protein [Streptococcus thermophilus LMD-9]_hit-name:divIVA _hit-score:550_hit-evalue:1e-158_identity-percent:98.2817869415807	0	0	0	0	1	0	0	0
65	VLDEHVPDSNDAASFDATRQFTPDEMAELQR	S9:+79.96633	a2.a2	gi|116627610|ref|YP_820229.1|STER_0782|Cell division initiation protein [Streptococcus thermophilus LMD-9]_hit-name:divIVA _hit-score:550_hit-evalue:1e-158_identity-percent:98.2817869415807	0	0	0	0	0	0	0	1
66	EDKTQNSYEESQELDFQDAK	S11:+79.96633	a3.a1	gi|116627170|ref|YP_819789.1|STER_0283|hypothetical protein STER_0283 [Streptococcus thermophilus LMD-9]_hit-name:pcsB _hit-score:34_hit-evalue:0.006_identity-percent:21.6981132075472	0	0	0	0	2	1	1	1
67	YEESQELDFQDAK	S4:+79.96633	a3.a1	gi|116627170|ref|YP_819789.1|STER_0283|hypothetical protein STER_0283 [Streptococcus thermophilus LMD-9]_hit-name:pcsB _hit-score:34_hit-evalue:0.006_identity-percent:21.6981132075472	0	0	0	0	0	2	0	0
68	DKTQNSYEESQELDFQDAK	S10:+79.96633	a3.a1	gi|116627170|ref|YP_819789.1|STER_0283|hypothetical protein STER_0283 [Streptococcus thermophilus LMD-9]_hit-name:pcsB _hit-score:34_hit-evalue:0.006_identity-percent:21.6981132075472	0	0	0	0	0	1	0	0
69	TQNSYEESQELDFQDAK	S8:+79.96633	a3.a1	gi|116627170|ref|YP_819789.1|STER_0283|hypothetical protein STER_0283 [Streptococcus thermophilus LMD-9]_hit-name:pcsB _hit-score:34_hit-evalue:0.006_identity-percent:21.6981132075472	0	0	0	0	5	2	4	6
70	QNSYEESQELDFQDAK	S3:+79.96633	a3.a1	gi|116627170|ref|YP_819789.1|STER_0283|hypothetical protein STER_0283 [Streptococcus thermophilus LMD-9]_hit-name:pcsB _hit-score:34_hit-evalue:0.006_identity-percent:21.6981132075472	0	0	0	0	1	0	0	0
71	SEDKTQNSYEESQELDFQDAK	S12:+79.96633	a3.a1	gi|116627170|ref|YP_819789.1|STER_0283|hypothetical protein STER_0283 [Streptococcus thermophilus LMD-9]_hit-name:pcsB _hit-score:34_hit-evalue:0.006_identity-percent:21.6981132075472	0	0	0	0	1	0	0	2
72	KTQNSYEESQELDFQDAK	S9:+79.96633	a3.a1	gi|116627170|ref|YP_819789.1|STER_0283|hypothetical protein STER_0283 [Streptococcus thermophilus LMD-9]_hit-name:pcsB _hit-score:34_hit-evalue:0.006_identity-percent:21.6981132075472	0	0	0	0	3	3	2	0
73	EESQELDFQDAK	S3:+79.96633	a3.a1	gi|116627170|ref|YP_819789.1|STER_0283|hypothetical protein STER_0283 [Streptococcus thermophilus LMD-9]_hit-name:pcsB _hit-score:34_hit-evalue:0.006_identity-percent:21.6981132075472	0	0	0	0	1	0	1	0
74	KIEADGDTSPLDAFIQK	T8:+79.96633	a3.a2	gi|116627170|ref|YP_819789.1|STER_0283|hypothetical protein STER_0283 [Streptococcus thermophilus LMD-9]_hit-name:pcsB _hit-score:34_hit-evalue:0.006_identity-percent:21.6981132075472	0	0	0	0	2	4	2	2
75	KIEADGDTSPLDAFIQK	S9:+79.96633	a3.a2	gi|116627170|ref|YP_819789.1|STER_0283|hypothetical protein STER_0283 [Streptococcus thermophilus LMD-9]_hit-name:pcsB _hit-score:34_hit-evalue:0.006_identity-percent:21.6981132075472	0	0	0	0	4	4	3	4
76	IEADGDTSPLDAFIQK	T7:+79.96633	a3.a2	gi|116627170|ref|YP_819789.1|STER_0283|hypothetical protein STER_0283 [Streptococcus thermophilus LMD-9]_hit-name:pcsB _hit-score:34_hit-evalue:0.006_identity-percent:21.6981132075472	0	0	0	0	2	0	1	0
77	IEADGDTSPLDAFIQK	S8:+79.96633	a3.a2	gi|116627170|ref|YP_819789.1|STER_0283|hypothetical protein STER_0283 [Streptococcus thermophilus LMD-9]_hit-name:pcsB _hit-score:34_hit-evalue:0.006_identity-percent:21.6981132075472	0	0	0	0	0	1	0	0
78	EAEINAGVTETDSILDK	T11:+79.96633	a3.a3	gi|116627170|ref|YP_819789.1|STER_0283|hypothetical protein STER_0283 [Streptococcus thermophilus LMD-9]_hit-name:pcsB _hit-score:34_hit-evalue:0.006_identity-percent:21.6981132075472	0	0	0	0	0	1	0	0
79	EAEINAGVTETDSILDK	T9:+79.96633	a3.a3	gi|116627170|ref|YP_819789.1|STER_0283|hypothetical protein STER_0283 [Streptococcus thermophilus LMD-9]_hit-name:pcsB _hit-score:34_hit-evalue:0.006_identity-percent:21.6981132075472	0	0	0	0	0	2	1	0
80	QRQEFADSGLIGQTLANESTNSTTADETVTPITSGFGTTETK	S19:+79.96633	a3.a4	gi|116627170|ref|YP_819789.1|STER_0283|hypothetical protein STER_0283 [Streptococcus thermophilus LMD-9]_hit-name:pcsB _hit-score:34_hit-evalue:0.006_identity-percent:21.6981132075472	0	0	0	0	0	0	1	0
81	QRQEFADSGLIGQTLANESTNSTTADETVTPITSGFGTTETK	S22:+79.96633	a3.a4	gi|116627170|ref|YP_819789.1|STER_0283|hypothetical protein STER_0283 [Streptococcus thermophilus LMD-9]_hit-name:pcsB _hit-score:34_hit-evalue:0.006_identity-percent:21.6981132075472	0	0	0	0	0	0	0	1
82	QRQEFADSGLIGQTLANESTNSTTADETVTPITSGFGTTETK	T33:+79.96633	a3.a4	gi|116627170|ref|YP_819789.1|STER_0283|hypothetical protein STER_0283 [Streptococcus thermophilus LMD-9]_hit-name:pcsB _hit-score:34_hit-evalue:0.006_identity-percent:21.6981132075472	0	0	0	0	0	1	0	0
83	QRQEFADSGLIGQTLANESTNSTTADETVTPITSGFGTTETK	T14:+79.96633	a3.a4	gi|116627170|ref|YP_819789.1|STER_0283|hypothetical protein STER_0283 [Streptococcus thermophilus LMD-9]_hit-name:pcsB _hit-score:34_hit-evalue:0.006_identity-percent:21.6981132075472	0	0	0	0	0	1	0	0
84	QRQEFADSGLIGQTLANESTNSTTADETVTPITSGFGTTETK	S8:+79.96633	a3.a4	gi|116627170|ref|YP_819789.1|STER_0283|hypothetical protein STER_0283 [Streptococcus thermophilus LMD-9]_hit-name:pcsB _hit-score:34_hit-evalue:0.006_identity-percent:21.6981132075472	0	0	0	0	1	0	0	0
85	ASEPQASKPLLEDVEVSETIDSEAIATTVAGVTGVK	S17:+79.96633	a3.a5	gi|116627170|ref|YP_819789.1|STER_0283|hypothetical protein STER_0283 [Streptococcus thermophilus LMD-9]_hit-name:pcsB _hit-score:34_hit-evalue:0.006_identity-percent:21.6981132075472	0	0	0	0	1	0	0	0
86	APAAPATDPGMMGY	Y14:+79.96633	a4.a1	gi|116627146|ref|YP_819765.1|STER_0253|groEL|Chaperonin GroEL (HSP60 family) [Streptococcus thermophilus LMD-9]_hit-name:groEL _hit-score:962_hit-evalue:0.0_identity-percent:95.5473098330241	0	3	0	5	7	6	9	2
87	APAAPATDPGMMGY	M11:+15.99491 - M12:+15.99491 - Y14:+79.96633	a4.a1	gi|116627146|ref|YP_819765.1|STER_0253|groEL|Chaperonin GroEL (HSP60 family) [Streptococcus thermophilus LMD-9]_hit-name:groEL _hit-score:962_hit-evalue:0.0_identity-percent:95.5473098330241	0	0	0	2	4	4	3	0
88	APAAPATDPGMMGY	M12:+15.99491 - Y14:+79.96633	a4.a1	gi|116627146|ref|YP_819765.1|STER_0253|groEL|Chaperonin GroEL (HSP60 family) [Streptococcus thermophilus LMD-9]_hit-name:groEL _hit-score:962_hit-evalue:0.0_identity-percent:95.5473098330241	0	1	0	1	4	1	3	1
89	APAAPATDPGMMGY	M11:+15.99491 - Y14:+79.96633	a4.a1	gi|116627146|ref|YP_819765.1|STER_0253|groEL|Chaperonin GroEL (HSP60 family) [Streptococcus thermophilus LMD-9]_hit-name:groEL _hit-score:962_hit-evalue:0.0_identity-percent:95.5473098330241	0	0	0	0	3	1	3	0
90	APAAPATDPGMMGY	T7:+79.96633	a4.a1	gi|116627146|ref|YP_819765.1|STER_0253|groEL|Chaperonin GroEL (HSP60 family) [Streptococcus thermophilus LMD-9]_hit-name:groEL _hit-score:962_hit-evalue:0.0_identity-percent:95.5473098330241	0	0	0	0	1	0	0	0
91	SQLETTTSEFDREK	T6:+79.96633	a4.a2	gi|116627146|ref|YP_819765.1|STER_0253|groEL|Chaperonin GroEL (HSP60 family) [Streptococcus thermophilus LMD-9]_hit-name:groEL _hit-score:962_hit-evalue:0.0_identity-percent:95.5473098330241	1	0	0	0	1	1	0	0
92	SQLETTTSEFDREK	S1:+79.96633	a4.a2	gi|116627146|ref|YP_819765.1|STER_0253|groEL|Chaperonin GroEL (HSP60 family) [Streptococcus thermophilus LMD-9]_hit-name:groEL _hit-score:962_hit-evalue:0.0_identity-percent:95.5473098330241	0	0	0	0	2	0	0	0
93	VNLIKSQLETTTSEFDREK	S6:+79.96633	a4.a2	gi|116627146|ref|YP_819765.1|STER_0253|groEL|Chaperonin GroEL (HSP60 family) [Streptococcus thermophilus LMD-9]_hit-name:groEL _hit-score:962_hit-evalue:0.0_identity-percent:95.5473098330241	0	0	0	0	1	0	0	0
94	TSRPLLIIADDVAGEALPTLVLNK	T1:+79.96633	a4.a3	gi|116627146|ref|YP_819765.1|STER_0253|groEL|Chaperonin GroEL (HSP60 family) [Streptococcus thermophilus LMD-9]_hit-name:groEL _hit-score:962_hit-evalue:0.0_identity-percent:95.5473098330241	1	0	1	0	0	1	1	0
95	TSRPLLIIADDVAGEALPTLVLNK	S2:+79.96633	a4.a3	gi|116627146|ref|YP_819765.1|STER_0253|groEL|Chaperonin GroEL (HSP60 family) [Streptococcus thermophilus LMD-9]_hit-name:groEL _hit-score:962_hit-evalue:0.0_identity-percent:95.5473098330241	0	1	0	0	0	0	1	1
96	TNDIAGDGTTTATVLTQAIVR	T9:+79.96633	a4.a4	gi|116627146|ref|YP_819765.1|STER_0253|groEL|Chaperonin GroEL (HSP60 family) [Streptococcus thermophilus LMD-9]_hit-name:groEL _hit-score:962_hit-evalue:0.0_identity-percent:95.5473098330241	2	0	0	0	0	0	0	0
97	TNDIAGDGTTTATVLTQAIVR	T11:+79.96633	a4.a4	gi|116627146|ref|YP_819765.1|STER_0253|groEL|Chaperonin GroEL (HSP60 family) [Streptococcus thermophilus LMD-9]_hit-name:groEL _hit-score:962_hit-evalue:0.0_identity-percent:95.5473098330241	0	0	0	0	0	0	1	0
98	DATMESLGQASK	S11:+79.96633	a4.a5	gi|116627146|ref|YP_819765.1|STER_0253|groEL|Chaperonin GroEL (HSP60 family) [Streptococcus thermophilus LMD-9]_hit-name:groEL _hit-score:962_hit-evalue:0.0_identity-percent:95.5473098330241	0	0	0	0	1	0	0	0
99	DATMESLGQASK	S6:+79.96633	a4.a5	gi|116627146|ref|YP_819765.1|STER_0253|groEL|Chaperonin GroEL (HSP60 family) [Streptococcus thermophilus LMD-9]_hit-name:groEL _hit-score:962_hit-evalue:0.0_identity-percent:95.5473098330241	0	0	0	0	1	0	0	0
100	IRGTFNVVAVK	T4:+79.96633	a4.a6	gi|116627146|ref|YP_819765.1|STER_0253|groEL|Chaperonin GroEL (HSP60 family) [Streptococcus thermophilus LMD-9]_hit-name:groEL _hit-score:962_hit-evalue:0.0_identity-percent:95.5473098330241	0	0	0	0	1	1	0	0
101	LSGGVAVIK	S2:+79.96633	a4.a7	gi|116627146|ref|YP_819765.1|STER_0253|groEL|Chaperonin GroEL (HSP60 family) [Streptococcus thermophilus LMD-9]_hit-name:groEL _hit-score:962_hit-evalue:0.0_identity-percent:95.5473098330241	1	1	0	0	0	0	0	0
102	EAIAQVAAVSSR	S10:+79.96633	a4.a8	gi|116627146|ref|YP_819765.1|STER_0253|groEL|Chaperonin GroEL (HSP60 family) [Streptococcus thermophilus LMD-9]_hit-name:groEL _hit-score:962_hit-evalue:0.0_identity-percent:95.5473098330241	0	0	0	0	0	0	1	0
103	VGNDGVITIEESR	T8:+79.96633	a4.a9	gi|116627146|ref|YP_819765.1|STER_0253|groEL|Chaperonin GroEL (HSP60 family) [Streptococcus thermophilus LMD-9]_hit-name:groEL _hit-score:962_hit-evalue:0.0_identity-percent:95.5473098330241	0	0	0	0	0	0	0	1
104	VTVDKDSTVIVEGAGSAEAIANR	S7:+79.96633 - T2:+79.96633	a4.b10	gi|116627146|ref|YP_819765.1|STER_0253|groEL|Chaperonin GroEL (HSP60 family) [Streptococcus thermophilus LMD-9]_hit-name:groEL _hit-score:962_hit-evalue:0.0_identity-percent:95.5473098330241	0	0	0	0	1	0	0	0
105	QIAYNAGYEGSVIIDK	S11:+79.96633	a4.b11	gi|116627146|ref|YP_819765.1|STER_0253|groEL|Chaperonin GroEL (HSP60 family) [Streptococcus thermophilus LMD-9]_hit-name:groEL _hit-score:962_hit-evalue:0.0_identity-percent:95.5473098330241	0	0	0	0	0	1	0	0
106	SALQNAASVASLILTTEAVVADKPEQK	S8:+79.96633	a4.b12	gi|116627146|ref|YP_819765.1|STER_0253|groEL|Chaperonin GroEL (HSP60 family) [Streptococcus thermophilus LMD-9]_hit-name:groEL _hit-score:962_hit-evalue:0.0_identity-percent:95.5473098330241	0	0	0	0	1	0	0	0
107	YASLDDSVIPDAENLK	S7:+79.96633	a5.a1	gi|116627940|ref|YP_820559.1|STER_1172|Phosphoglycerate mutase 1 [Streptococcus thermophilus LMD-9]_hit-name:gpmA _hit-score:469_hit-evalue:1e-134_identity-percent:100	7	4	3	2	3	6	3	7
108	YASLDDSVIPDAENLK	S3:+79.96633	a5.a1	gi|116627940|ref|YP_820559.1|STER_1172|Phosphoglycerate mutase 1 [Streptococcus thermophilus LMD-9]_hit-name:gpmA _hit-score:469_hit-evalue:1e-134_identity-percent:100	0	0	0	0	2	0	1	2
109	YASLDDSVIPDAENLK	Y1:+79.96633	a5.a1	gi|116627940|ref|YP_820559.1|STER_1172|Phosphoglycerate mutase 1 [Streptococcus thermophilus LMD-9]_hit-name:gpmA _hit-score:469_hit-evalue:1e-134_identity-percent:100	0	0	1	0	0	0	0	0
110	YASLDDSVIPDAENLKVTLER	S7:+79.96633	a5.a1	gi|116627940|ref|YP_820559.1|STER_1172|Phosphoglycerate mutase 1 [Streptococcus thermophilus LMD-9]_hit-name:gpmA _hit-score:469_hit-evalue:1e-134_identity-percent:100	0	0	1	2	0	0	1	0
111	HYGGLTGK	Y2:+79.96633	a5.a2	gi|116627940|ref|YP_820559.1|STER_1172|Phosphoglycerate mutase 1 [Streptococcus thermophilus LMD-9]_hit-name:gpmA _hit-score:469_hit-evalue:1e-134_identity-percent:100	0	0	0	0	1	0	0	0
112	TIVFNTNHDILDGTETVISGASCTTNCLAPMAK	C23:+57.02146 - C27:+57.02146 - M31:+15.99491 - S19:+79.96633 - S22:+79.96633	a6.a1	gi|116628477|ref|YP_821096.1|STER_1761|Glyceraldehyde-3-phosphate dehydrogenase [Streptococcus thermophilus LMD-9]_hit-name:gapA1 _hit-score:633_hit-evalue:0.0_identity-percent:94.6428571428571	0	0	0	0	0	1	0	0
113	TIVFNTNHDILDGTETVISGASCTTNCLAPMAK	C23:+57.02146 - C27:+57.02146 - M31:+15.99491 - T24:+79.96633 - T25:+79.96633	a6.a1	gi|116628477|ref|YP_821096.1|STER_1761|Glyceraldehyde-3-phosphate dehydrogenase [Streptococcus thermophilus LMD-9]_hit-name:gapA1 _hit-score:633_hit-evalue:0.0_identity-percent:94.6428571428571	1	0	0	0	0	1	0	1
114	TIVFNTNHDILDGTETVISGASCTTNCLAPMAK	C23:+57.02146 - C27:+57.02146 - T14:+79.96633 - T16:+79.96633	a6.a1	gi|116628477|ref|YP_821096.1|STER_1761|Glyceraldehyde-3-phosphate dehydrogenase [Streptococcus thermophilus LMD-9]_hit-name:gapA1 _hit-score:633_hit-evalue:0.0_identity-percent:94.6428571428571	1	0	0	0	0	1	0	0
115	TIVFNTNHDILDGTETVISGASCTTNCLAPMAK	C23:+57.02146 - C27:+57.02146 - T14:+79.96633 - T24:+79.96633	a6.a1	gi|116628477|ref|YP_821096.1|STER_1761|Glyceraldehyde-3-phosphate dehydrogenase [Streptococcus thermophilus LMD-9]_hit-name:gapA1 _hit-score:633_hit-evalue:0.0_identity-percent:94.6428571428571	0	0	0	0	0	0	0	1
116	TIVFNTNHDILDGTETVISGASCTTNCLAPMAK	C23:+57.02146 - C27:+57.02146 - M31:+15.99491 - S22:+79.96633	a6.a1	gi|116628477|ref|YP_821096.1|STER_1761|Glyceraldehyde-3-phosphate dehydrogenase [Streptococcus thermophilus LMD-9]_hit-name:gapA1 _hit-score:633_hit-evalue:0.0_identity-percent:94.6428571428571	0	0	1	0	0	0	0	0
117	TIVFNTNHDILDGTETVISGASCTTNCLAPMAK	C23:+57.02146 - C27:+57.02146 - M31:+15.99491 - T25:+79.96633	a6.a1	gi|116628477|ref|YP_821096.1|STER_1761|Glyceraldehyde-3-phosphate dehydrogenase [Streptococcus thermophilus LMD-9]_hit-name:gapA1 _hit-score:633_hit-evalue:0.0_identity-percent:94.6428571428571	0	0	1	0	0	0	0	0
118	TIVFNTNHDILDGTETVISGASCTTNCLAPMAK	C23:+57.02146 - C27:+57.02146 - M31:+15.99491 - S19:+79.96633	a6.a1	gi|116628477|ref|YP_821096.1|STER_1761|Glyceraldehyde-3-phosphate dehydrogenase [Streptococcus thermophilus LMD-9]_hit-name:gapA1 _hit-score:633_hit-evalue:0.0_identity-percent:94.6428571428571	0	0	0	0	0	0	0	1
119	TIVFNTNHDILDGTETVISGASCTTNCLAPMAK	C23:+57.02146 - C27:+57.02146 - T24:+79.96633	a6.a1	gi|116628477|ref|YP_821096.1|STER_1761|Glyceraldehyde-3-phosphate dehydrogenase [Streptococcus thermophilus LMD-9]_hit-name:gapA1 _hit-score:633_hit-evalue:0.0_identity-percent:94.6428571428571	0	0	0	1	0	0	0	0
120	TIVFNTNHDILDGTETVISGASCTTNCLAPMAK	C23:+57.02146 - C27:+57.02146 - M31:+15.99491 - T16:+79.96633 - T25:+79.96633	a6.a1	gi|116628477|ref|YP_821096.1|STER_1761|Glyceraldehyde-3-phosphate dehydrogenase [Streptococcus thermophilus LMD-9]_hit-name:gapA1 _hit-score:633_hit-evalue:0.0_identity-percent:94.6428571428571	0	0	1	0	0	0	0	0
121	TIVFNTNHDILDGTETVISGASCTTNCLAPMAK	C23:+57.02146 - C27:+57.02146 - M31:+15.99491 - S19:+79.96633 - T24:+79.96633	a6.a1	gi|116628477|ref|YP_821096.1|STER_1761|Glyceraldehyde-3-phosphate dehydrogenase [Streptococcus thermophilus LMD-9]_hit-name:gapA1 _hit-score:633_hit-evalue:0.0_identity-percent:94.6428571428571	0	0	0	0	1	1	0	0
122	TIVFNTNHDILDGTETVISGASCTTNCLAPMAK	C23:+57.02146 - C27:+57.02146 - T24:+79.96633 - T25:+79.96633	a6.a1	gi|116628477|ref|YP_821096.1|STER_1761|Glyceraldehyde-3-phosphate dehydrogenase [Streptococcus thermophilus LMD-9]_hit-name:gapA1 _hit-score:633_hit-evalue:0.0_identity-percent:94.6428571428571	0	0	0	0	0	1	0	1
123	TIVFNTNHDILDGTETVISGASCTTNCLAPMAK	C23:+57.02146 - C27:+57.02146 - S19:+79.96633 - T25:+79.96633	a6.a1	gi|116628477|ref|YP_821096.1|STER_1761|Glyceraldehyde-3-phosphate dehydrogenase [Streptococcus thermophilus LMD-9]_hit-name:gapA1 _hit-score:633_hit-evalue:0.0_identity-percent:94.6428571428571	0	0	2	0	0	0	0	1
124	TIVFNTNHDILDGTETVISGASCTTNCLAPMAK	C23:+57.02146 - C27:+57.02146 - S22:+79.96633 - T25:+79.96633	a6.a1	gi|116628477|ref|YP_821096.1|STER_1761|Glyceraldehyde-3-phosphate dehydrogenase [Streptococcus thermophilus LMD-9]_hit-name:gapA1 _hit-score:633_hit-evalue:0.0_identity-percent:94.6428571428571	0	1	1	0	0	1	0	0
125	TIVFNTNHDILDGTETVISGASCTTNCLAPMAK	C23:+57.02146 - C27:+57.02146 - S19:+79.96633 - T24:+79.96633	a6.a1	gi|116628477|ref|YP_821096.1|STER_1761|Glyceraldehyde-3-phosphate dehydrogenase [Streptococcus thermophilus LMD-9]_hit-name:gapA1 _hit-score:633_hit-evalue:0.0_identity-percent:94.6428571428571	0	2	1	0	0	0	0	0
126	TIVFNTNHDILDGTETVISGASCTTNCLAPMAK	C23:+57.02146 - C27:+57.02146 - S19:+79.96633 - S22:+79.96633	a6.a1	gi|116628477|ref|YP_821096.1|STER_1761|Glyceraldehyde-3-phosphate dehydrogenase [Streptococcus thermophilus LMD-9]_hit-name:gapA1 _hit-score:633_hit-evalue:0.0_identity-percent:94.6428571428571	1	0	0	0	0	1	0	2
127	AGAANIVPNSTGAAK	S10:+79.96633	a6.a2	gi|116628477|ref|YP_821096.1|STER_1761|Glyceraldehyde-3-phosphate dehydrogenase [Streptococcus thermophilus LMD-9]_hit-name:gapA1 _hit-score:633_hit-evalue:0.0_identity-percent:94.6428571428571	2	2	1	1	2	2	2	2
128	AATNESYGYTEDPIVSSDIVGMSYGSLFDATQTK	S16:+79.96633	a6.a3	gi|116628477|ref|YP_821096.1|STER_1761|Glyceraldehyde-3-phosphate dehydrogenase [Streptococcus thermophilus LMD-9]_hit-name:gapA1 _hit-score:633_hit-evalue:0.0_identity-percent:94.6428571428571	0	0	0	0	2	1	0	0
129	AATNESYGYTEDPIVSSDIVGMSYGSLFDATQTK	M22:+15.99491 - Y24:+79.96633	a6.a3	gi|116628477|ref|YP_821096.1|STER_1761|Glyceraldehyde-3-phosphate dehydrogenase [Streptococcus thermophilus LMD-9]_hit-name:gapA1 _hit-score:633_hit-evalue:0.0_identity-percent:94.6428571428571	0	0	0	0	1	0	0	0
130	AATNESYGYTEDPIVSSDIVGMSYGSLFDATQTK	S6:+79.96633	a6.a3	gi|116628477|ref|YP_821096.1|STER_1761|Glyceraldehyde-3-phosphate dehydrogenase [Streptococcus thermophilus LMD-9]_hit-name:gapA1 _hit-score:633_hit-evalue:0.0_identity-percent:94.6428571428571	0	0	0	0	0	0	2	0
131	AATNESYGYTEDPIVSSDIVGMSYGSLFDATQTK	S17:+79.96633	a6.a3	gi|116628477|ref|YP_821096.1|STER_1761|Glyceraldehyde-3-phosphate dehydrogenase [Streptococcus thermophilus LMD-9]_hit-name:gapA1 _hit-score:633_hit-evalue:0.0_identity-percent:94.6428571428571	0	0	0	0	0	1	0	0
132	AATNESYGYTEDPIVSSDIVGMSYGSLFDATQTK	Y9:+79.96633	a6.a3	gi|116628477|ref|YP_821096.1|STER_1761|Glyceraldehyde-3-phosphate dehydrogenase [Streptococcus thermophilus LMD-9]_hit-name:gapA1 _hit-score:633_hit-evalue:0.0_identity-percent:94.6428571428571	0	0	0	0	0	0	0	1
133	AATNESYGYTEDPIVSSDIVGMSYGSLFDATQTK	T3:+79.96633	a6.a3	gi|116628477|ref|YP_821096.1|STER_1761|Glyceraldehyde-3-phosphate dehydrogenase [Streptococcus thermophilus LMD-9]_hit-name:gapA1 _hit-score:633_hit-evalue:0.0_identity-percent:94.6428571428571	0	0	0	0	0	1	0	0
134	VDSVSSVGPEK	S5:+79.96633	a7.a1	gi|116628133|ref|YP_820752.1|STER_1392|serine/threonine protein kinase, fused to several beta-lactam (PASTA) domains [Streptococcus thermophilus LMD-9]_hit-name:pknB _hit-score:1052_hit-evalue:0.0_identity-percent:94.4922547332186	0	0	0	0	1	0	0	0
135	VVFDDMTDTKTLPK	T9:+79.96633	a7.a1	gi|116628133|ref|YP_820752.1|STER_1392|serine/threonine protein kinase, fused to several beta-lactam (PASTA) domains [Streptococcus thermophilus LMD-9]_hit-name:pknB _hit-score:1052_hit-evalue:0.0_identity-percent:94.4922547332186	0	0	0	0	6	4	2	4
136	VVFDDMTDTKTLPK	T7:+79.96633	a7.a1	gi|116628133|ref|YP_820752.1|STER_1392|serine/threonine protein kinase, fused to several beta-lactam (PASTA) domains [Streptococcus thermophilus LMD-9]_hit-name:pknB _hit-score:1052_hit-evalue:0.0_identity-percent:94.4922547332186	0	0	0	0	0	0	0	1
137	VVFDDMTDTKTLPKVDSVSSVGPEK	T11:+79.96633	a7.a1	gi|116628133|ref|YP_820752.1|STER_1392|serine/threonine protein kinase, fused to several beta-lactam (PASTA) domains [Streptococcus thermophilus LMD-9]_hit-name:pknB _hit-score:1052_hit-evalue:0.0_identity-percent:94.4922547332186	0	0	0	0	0	0	1	0
138	VVFDDMTDTKTLPK	M6:+15.99491 - T9:+79.96633	a7.a1	gi|116628133|ref|YP_820752.1|STER_1392|serine/threonine protein kinase, fused to several beta-lactam (PASTA) domains [Streptococcus thermophilus LMD-9]_hit-name:pknB _hit-score:1052_hit-evalue:0.0_identity-percent:94.4922547332186	0	0	0	0	4	2	1	2
139	VVFDDMTDTKTLPKVDSVSSVGPEK	T7:+79.96633	a7.a1	gi|116628133|ref|YP_820752.1|STER_1392|serine/threonine protein kinase, fused to several beta-lactam (PASTA) domains [Streptococcus thermophilus LMD-9]_hit-name:pknB _hit-score:1052_hit-evalue:0.0_identity-percent:94.4922547332186	0	0	0	0	0	2	0	0
140	VVFDDMTDTK	M6:+15.99491 - T9:+79.96633	a7.a1	gi|116628133|ref|YP_820752.1|STER_1392|serine/threonine protein kinase, fused to several beta-lactam (PASTA) domains [Streptococcus thermophilus LMD-9]_hit-name:pknB _hit-score:1052_hit-evalue:0.0_identity-percent:94.4922547332186	0	0	0	0	0	1	0	0
141	VVFDDMTDTK	T9:+79.96633	a7.a1	gi|116628133|ref|YP_820752.1|STER_1392|serine/threonine protein kinase, fused to several beta-lactam (PASTA) domains [Streptococcus thermophilus LMD-9]_hit-name:pknB _hit-score:1052_hit-evalue:0.0_identity-percent:94.4922547332186	0	0	0	0	0	2	0	0
142	VVFDDMTDTKTLPKVDSVSSVGPEK	T9:+79.96633	a7.a1	gi|116628133|ref|YP_820752.1|STER_1392|serine/threonine protein kinase, fused to several beta-lactam (PASTA) domains [Streptococcus thermophilus LMD-9]_hit-name:pknB _hit-score:1052_hit-evalue:0.0_identity-percent:94.4922547332186	0	0	0	0	1	0	0	0
143	VTDFGIAVAFAETSLTQTNSMLGSVHYLSPEQAR	S14:+79.96633	a7.a2	gi|116628133|ref|YP_820752.1|STER_1392|serine/threonine protein kinase, fused to several beta-lactam (PASTA) domains [Streptococcus thermophilus LMD-9]_hit-name:pknB _hit-score:1052_hit-evalue:0.0_identity-percent:94.4922547332186	0	0	0	0	1	0	0	0
144	TENASAGVMISASHNPALDNGIK	M9:+15.99491 - S13:+79.96633	a8.a1	gi|116627995|ref|YP_820614.1|STER_1230|Phosphomannomutase [Streptococcus thermophilus LMD-9]_hit-name:pgmA _hit-score:49_hit-evalue:2e-07_identity-percent:37.0967741935484	1	1	1	0	2	2	0	0
145	TENASAGVMISASHNPALDNGIK	M9:+15.99491 - S11:+79.96633	a8.a1	gi|116627995|ref|YP_820614.1|STER_1230|Phosphomannomutase [Streptococcus thermophilus LMD-9]_hit-name:pgmA _hit-score:49_hit-evalue:2e-07_identity-percent:37.0967741935484	0	0	0	0	1	0	0	1
146	TENASAGVMISASHNPALDNGIK	S11:+79.96633	a8.a1	gi|116627995|ref|YP_820614.1|STER_1230|Phosphomannomutase [Streptococcus thermophilus LMD-9]_hit-name:pgmA _hit-score:49_hit-evalue:2e-07_identity-percent:37.0967741935484	1	2	2	1	2	1	1	2
147	TENASAGVMISASHNPALDNGIK	S13:+79.96633	a8.a1	gi|116627995|ref|YP_820614.1|STER_1230|Phosphomannomutase [Streptococcus thermophilus LMD-9]_hit-name:pgmA _hit-score:49_hit-evalue:2e-07_identity-percent:37.0967741935484	0	1	0	1	1	1	2	1
148	ARDNGYAVGGFNTNNLEWTQAILR	Y6:+79.96633	a9.a1	gi|116628570|ref|YP_821189.1|STER_1876|Fructose/tagatose bisphosphate aldolase [Streptococcus thermophilus LMD-9]_hit-name:tnp1191 _hit-score:_hit-evalue:1.2_identity-percent:29.1666666666667	0	1	0	1	2	0	0	0
149	ARDNGYAVGGFNTNNLEWTQAILR	T13:+79.96633	a9.a1	gi|116628570|ref|YP_821189.1|STER_1876|Fructose/tagatose bisphosphate aldolase [Streptococcus thermophilus LMD-9]_hit-name:tnp1191 _hit-score:_hit-evalue:1.2_identity-percent:29.1666666666667	0	1	1	0	0	0	1	1
150	NGYAVGGFNTNNLEWTQAILR	Y3:+79.96633 - N1:+42.01056	a9.a1	gi|116628570|ref|YP_821189.1|STER_1876|Fructose/tagatose bisphosphate aldolase [Streptococcus thermophilus LMD-9]_hit-name:tnp1191 _hit-score:_hit-evalue:1.2_identity-percent:29.1666666666667	0	2	0	0	1	0	1	0
151	NGYAVGGFNTNNLEWTQAILR	T10:+79.96633 - N1:+42.01056	a9.a1	gi|116628570|ref|YP_821189.1|STER_1876|Fructose/tagatose bisphosphate aldolase [Streptococcus thermophilus LMD-9]_hit-name:tnp1191 _hit-score:_hit-evalue:1.2_identity-percent:29.1666666666667	0	0	0	0	0	0	1	0
152	SAEKFVQAARDNGYAVGGFNTNNLEWTQAILR	S1:+79.96633 - S1:+42.01056	a9.a1	gi|116628570|ref|YP_821189.1|STER_1876|Fructose/tagatose bisphosphate aldolase [Streptococcus thermophilus LMD-9]_hit-name:tnp1191 _hit-score:_hit-evalue:1.2_identity-percent:29.1666666666667	0	1	0	1	0	0	1	0
153	SAEKFVQAARDNGYAVGGFNTNNLEWTQAILR	Y14:+79.96633 - S1:+42.01056	a9.a1	gi|116628570|ref|YP_821189.1|STER_1876|Fructose/tagatose bisphosphate aldolase [Streptococcus thermophilus LMD-9]_hit-name:tnp1191 _hit-score:_hit-evalue:1.2_identity-percent:29.1666666666667	0	1	0	1	0	0	0	0
154	AEKFVQAARDNGYAVGGFNTNNLEWTQAILR	T20:+79.96633 - Y13:+79.96633 - A1:+42.01056	a9.a1	gi|116628570|ref|YP_821189.1|STER_1876|Fructose/tagatose bisphosphate aldolase [Streptococcus thermophilus LMD-9]_hit-name:tnp1191 _hit-score:_hit-evalue:1.2_identity-percent:29.1666666666667	0	0	0	0	0	1	1	0
155	NGYAVGGFNTNNLEWTQAILR	Y3:+79.96633	a9.a1	gi|116628570|ref|YP_821189.1|STER_1876|Fructose/tagatose bisphosphate aldolase [Streptococcus thermophilus LMD-9]_hit-name:tnp1191 _hit-score:_hit-evalue:1.2_identity-percent:29.1666666666667	0	0	0	2	0	0	0	0
156	NGYAVGGFNTNNLEWTQAILR	T10:+79.96633	a9.a1	gi|116628570|ref|YP_821189.1|STER_1876|Fructose/tagatose bisphosphate aldolase [Streptococcus thermophilus LMD-9]_hit-name:tnp1191 _hit-score:_hit-evalue:1.2_identity-percent:29.1666666666667	0	1	0	0	0	0	0	0
157	EKFVQAARDNGYAVGGFNTNNLEWTQAILR	T19:+79.96633 - Y12:+79.96633 - E1:+42.01056	a9.a1	gi|116628570|ref|YP_821189.1|STER_1876|Fructose/tagatose bisphosphate aldolase [Streptococcus thermophilus LMD-9]_hit-name:tnp1191 _hit-score:_hit-evalue:1.2_identity-percent:29.1666666666667	0	0	0	1	0	0	0	0
158	VNVNTECQIAFANATR	C7:+57.02146 - T5:+79.96633	a9.a2	gi|116628570|ref|YP_821189.1|STER_1876|Fructose/tagatose bisphosphate aldolase [Streptococcus thermophilus LMD-9]_hit-name:tnp1191 _hit-score:_hit-evalue:1.2_identity-percent:29.1666666666667	0	0	0	1	2	2	0	2
159	LTEAVPGFPIVLHGGSGIPDDQIQEAIK	S16:+79.96633	a9.a3	gi|116628570|ref|YP_821189.1|STER_1876|Fructose/tagatose bisphosphate aldolase [Streptococcus thermophilus LMD-9]_hit-name:tnp1191 _hit-score:_hit-evalue:1.2_identity-percent:29.1666666666667	0	1	0	1	0	0	2	0
160	VQGAFFNSGQYQMIFGTGTVNK	M13:+15.99491 - S8:+79.96633	b10.a1	gi|116628430|ref|YP_821049.1|STER_1710|sucrose PTS, EIIBCA [Streptococcus thermophilus LMD-9]_hit-name:scrA _hit-score:1031_hit-evalue:0.0_identity-percent:85.4660347551343	0	0	0	0	2	0	0	0
161	VQGAFFNSGQYQMIFGTGTVNK	T17:+79.96633	b10.a1	gi|116628430|ref|YP_821049.1|STER_1710|sucrose PTS, EIIBCA [Streptococcus thermophilus LMD-9]_hit-name:scrA _hit-score:1031_hit-evalue:0.0_identity-percent:85.4660347551343	0	2	0	1	2	2	1	0
162	VQGAFFNSGQYQMIFGTGTVNK	S8:+79.96633	b10.a1	gi|116628430|ref|YP_821049.1|STER_1710|sucrose PTS, EIIBCA [Streptococcus thermophilus LMD-9]_hit-name:scrA _hit-score:1031_hit-evalue:0.0_identity-percent:85.4660347551343	1	3	4	2	1	1	1	0
163	VQGAFFNSGQYQMIFGTGTVNK	Y11:+79.96633	b10.a1	gi|116628430|ref|YP_821049.1|STER_1710|sucrose PTS, EIIBCA [Streptococcus thermophilus LMD-9]_hit-name:scrA _hit-score:1031_hit-evalue:0.0_identity-percent:85.4660347551343	0	0	0	0	1	0	0	0
164	TASGFVLAGASHETTK	S11:+79.96633	b11.a1	gi|116627145|ref|YP_819764.1|STER_0252|groES|Co-chaperonin GroES (HSP10) [Streptococcus thermophilus LMD-9]_hit-name:groES _hit-score:181_hit-evalue:2e-48_identity-percent:100	3	2	2	0	3	3	1	3
165	TASGFVLAGASHETTK	S3:+79.96633	b11.a1	gi|116627145|ref|YP_819764.1|STER_0252|groES|Co-chaperonin GroES (HSP10) [Streptococcus thermophilus LMD-9]_hit-name:groES _hit-score:181_hit-evalue:2e-48_identity-percent:100	2	0	1	0	1	2	0	2
166	TASGFVLAGASHETTK	T14:+79.96633	b11.a1	gi|116627145|ref|YP_819764.1|STER_0252|groES|Co-chaperonin GroES (HSP10) [Streptococcus thermophilus LMD-9]_hit-name:groES _hit-score:181_hit-evalue:2e-48_identity-percent:100	0	0	0	0	0	1	0	0
167	TLTGELIAPSVAVGDK	S10:+79.96633	b11.a2	gi|116627145|ref|YP_819764.1|STER_0252|groES|Co-chaperonin GroES (HSP10) [Streptococcus thermophilus LMD-9]_hit-name:groES _hit-score:181_hit-evalue:2e-48_identity-percent:100	1	1	0	0	0	0	0	0
168	DYASIDAAPEER	S4:+79.96633	b12.a1	gi|116627379|ref|YP_819998.1|STER_0524|GTPase - translation elongation factor [Streptococcus thermophilus LMD-9]_hit-name:tuf _hit-score:726_hit-evalue:0.0_identity-percent:92.713567839196	3	2	0	0	2	1	0	1
169	DYASIDAAPEER	Y2:+79.96633	b12.a1	gi|116627379|ref|YP_819998.1|STER_0524|GTPase - translation elongation factor [Streptococcus thermophilus LMD-9]_hit-name:tuf _hit-score:726_hit-evalue:0.0_identity-percent:92.713567839196	0	0	0	0	0	0	0	1
170	VNTPKDYASIDAAPEER	T3:+79.96633 - Y7:+79.96633	b12.a1	gi|116627379|ref|YP_819998.1|STER_0524|GTPase - translation elongation factor [Streptococcus thermophilus LMD-9]_hit-name:tuf _hit-score:726_hit-evalue:0.0_identity-percent:92.713567839196	0	0	0	0	1	0	0	0
171	DLLSEYDFPGDDIPVIQGSALK	S19:+79.96633	b12.a2	gi|116627379|ref|YP_819998.1|STER_0524|GTPase - translation elongation factor [Streptococcus thermophilus LMD-9]_hit-name:tuf _hit-score:726_hit-evalue:0.0_identity-percent:92.713567839196	0	0	0	0	0	1	0	0
172	DLLSEYDFPGDDIPVIQGSALK	Y6:+79.96633	b12.a2	gi|116627379|ref|YP_819998.1|STER_0524|GTPase - translation elongation factor [Streptococcus thermophilus LMD-9]_hit-name:tuf _hit-score:726_hit-evalue:0.0_identity-percent:92.713567839196	2	1	4	0	1	0	0	3
173	DTDKPLLLPVEDVFSITGR	T17:+79.96633	b12.a3	gi|116627379|ref|YP_819998.1|STER_0524|GTPase - translation elongation factor [Streptococcus thermophilus LMD-9]_hit-name:tuf _hit-score:726_hit-evalue:0.0_identity-percent:92.713567839196	0	0	0	0	1	0	0	0
174	DTDKPLLLPVEDVFSITGR	S15:+79.96633	b12.a3	gi|116627379|ref|YP_819998.1|STER_0524|GTPase - translation elongation factor [Streptococcus thermophilus LMD-9]_hit-name:tuf _hit-score:726_hit-evalue:0.0_identity-percent:92.713567839196	0	0	0	0	1	0	0	0
175	GITINTAHVEYETEK	T3:+79.96633	b12.a4	gi|116627379|ref|YP_819998.1|STER_0524|GTPase - translation elongation factor [Streptococcus thermophilus LMD-9]_hit-name:tuf _hit-score:726_hit-evalue:0.0_identity-percent:92.713567839196	1	0	0	0	0	0	0	0
176	SKITTSLLQEMVQAAATR	T4:+79.96633	b13.a1	gi|116628556|ref|YP_821175.1|STER_1854|Predicted kinase related to dihydroxyacetone kinase [Streptococcus thermophilus LMD-9]_hit-name:rpoC _hit-score:30_hit-evalue:0.10_identity-percent:19.8412698412698	0	0	0	0	0	0	0	1
177	SKITTSLLQEMVQAAATR	T5:+79.96633	b13.a1	gi|116628556|ref|YP_821175.1|STER_1854|Predicted kinase related to dihydroxyacetone kinase [Streptococcus thermophilus LMD-9]_hit-name:rpoC _hit-score:30_hit-evalue:0.10_identity-percent:19.8412698412698	0	0	0	0	0	0	1	0
178	SKITTSLLQEMVQAAATR	S6:+79.96633	b13.a1	gi|116628556|ref|YP_821175.1|STER_1854|Predicted kinase related to dihydroxyacetone kinase [Streptococcus thermophilus LMD-9]_hit-name:rpoC _hit-score:30_hit-evalue:0.10_identity-percent:19.8412698412698	0	1	0	1	0	0	0	0
179	SKITTSLLQEMVQAAATR	S1:+79.96633	b13.a1	gi|116628556|ref|YP_821175.1|STER_1854|Predicted kinase related to dihydroxyacetone kinase [Streptococcus thermophilus LMD-9]_hit-name:rpoC _hit-score:30_hit-evalue:0.10_identity-percent:19.8412698412698	0	0	1	0	0	0	0	1
180	ITTSLLQEMVQAAATR	S4:+79.96633	b13.a1	gi|116628556|ref|YP_821175.1|STER_1854|Predicted kinase related to dihydroxyacetone kinase [Streptococcus thermophilus LMD-9]_hit-name:rpoC _hit-score:30_hit-evalue:0.10_identity-percent:19.8412698412698	0	1	0	0	1	2	2	1
181	ITTSLLQEMVQAAATR	T3:+79.96633	b13.a1	gi|116628556|ref|YP_821175.1|STER_1854|Predicted kinase related to dihydroxyacetone kinase [Streptococcus thermophilus LMD-9]_hit-name:rpoC _hit-score:30_hit-evalue:0.10_identity-percent:19.8412698412698	2	0	0	0	1	0	0	1
182	ITTSLLQEMVQAAATR	T2:+79.96633	b13.a1	gi|116628556|ref|YP_821175.1|STER_1854|Predicted kinase related to dihydroxyacetone kinase [Streptococcus thermophilus LMD-9]_hit-name:rpoC _hit-score:30_hit-evalue:0.10_identity-percent:19.8412698412698	0	0	0	0	1	0	0	0
183	SGETEDSTIADIAVATNAGQIK	T8:+79.96633	b14.a1	gi|116627519|ref|YP_820138.1|STER_0684|eno|Enolase [Streptococcus thermophilus LMD-9]_hit-name:eno _hit-score:853_hit-evalue:0.0_identity-percent:99.5391705069124	0	1	0	0	1	0	0	1
184	SGETEDSTIADIAVATNAGQIK	S1:+79.96633	b14.a1	gi|116627519|ref|YP_820138.1|STER_0684|eno|Enolase [Streptococcus thermophilus LMD-9]_hit-name:eno _hit-score:853_hit-evalue:0.0_identity-percent:99.5391705069124	0	0	1	1	0	0	0	1
185	SGETEDSTIADIAVATNAGQIK	T4:+79.96633	b14.a1	gi|116627519|ref|YP_820138.1|STER_0684|eno|Enolase [Streptococcus thermophilus LMD-9]_hit-name:eno _hit-score:853_hit-evalue:0.0_identity-percent:99.5391705069124	0	0	1	0	0	0	0	1
186	EAGYTAVVSHRSGETEDSTIADIAVATNAGQIK	S12:+79.96633	b14.a1	gi|116627519|ref|YP_820138.1|STER_0684|eno|Enolase [Streptococcus thermophilus LMD-9]_hit-name:eno _hit-score:853_hit-evalue:0.0_identity-percent:99.5391705069124	0	0	0	1	0	0	0	0
187	MSIITDVYAR	M1:+15.99491 - S2:+79.96633	b14.a2	gi|116627519|ref|YP_820138.1|STER_0684|eno|Enolase [Streptococcus thermophilus LMD-9]_hit-name:eno _hit-score:853_hit-evalue:0.0_identity-percent:99.5391705069124	0	1	0	0	4	0	1	0
188	GMVPSGASTGEHEAVELR	S5:+79.96633	b14.a3	gi|116627519|ref|YP_820138.1|STER_0684|eno|Enolase [Streptococcus thermophilus LMD-9]_hit-name:eno _hit-score:853_hit-evalue:0.0_identity-percent:99.5391705069124	0	1	1	0	1	0	0	0
189	GMVPSGASTGEHEAVELR	S8:+79.96633	b14.a3	gi|116627519|ref|YP_820138.1|STER_0684|eno|Enolase [Streptococcus thermophilus LMD-9]_hit-name:eno _hit-score:853_hit-evalue:0.0_identity-percent:99.5391705069124	1	0	0	0	0	0	0	0
190	YATSVDLDGK	T3:+79.96633	b15.a1	gi|116628669|ref|YP_821288.1|STER_1987|Uncharacterized conserved protein containing XRE-family DNA-binding domain [Streptococcus thermophilus LMD-9]_hit-name:purH _hit-score:25_hit-evalue:1.1_identity-percent:38.8888888888889	0	0	0	0	2	3	4	1
191	YATSVDLDGK	Y1:+79.96633	b15.a1	gi|116628669|ref|YP_821288.1|STER_1987|Uncharacterized conserved protein containing XRE-family DNA-binding domain [Streptococcus thermophilus LMD-9]_hit-name:purH _hit-score:25_hit-evalue:1.1_identity-percent:38.8888888888889	0	0	0	0	2	0	0	0
192	DIQQEALEKYATSVDLDGK	T12:+79.96633	b15.a1	gi|116628669|ref|YP_821288.1|STER_1987|Uncharacterized conserved protein containing XRE-family DNA-binding domain [Streptococcus thermophilus LMD-9]_hit-name:purH _hit-score:25_hit-evalue:1.1_identity-percent:38.8888888888889	0	0	0	0	0	0	1	0
193	KEDILDTKVPMSR	T7:+79.96633	b15.a2	gi|116628669|ref|YP_821288.1|STER_1987|Uncharacterized conserved protein containing XRE-family DNA-binding domain [Streptococcus thermophilus LMD-9]_hit-name:purH _hit-score:25_hit-evalue:1.1_identity-percent:38.8888888888889	0	0	0	0	2	1	0	0
194	GFTDETVR	T6:+79.96633	b16.a1	gi|116628624|ref|YP_821243.1|STER_1937|hypothetical protein STER_1937 [Streptococcus thermophilus LMD-9]_hit-name:citB _hit-score:27_hit-evalue:0.044_identity-percent:29.6296296296296	0	0	0	0	3	2	3	0
195	GFTDETVRFNLNDGDK	T6:+79.96633	b16.a1	gi|116628624|ref|YP_821243.1|STER_1937|hypothetical protein STER_1937 [Streptococcus thermophilus LMD-9]_hit-name:citB _hit-score:27_hit-evalue:0.044_identity-percent:29.6296296296296	0	0	0	0	2	3	0	0
196	FTDETVRFNLNDGDKNEISNTLTNVYR	T2:+79.96633 - T5:+79.96633	b16.a1	gi|116628624|ref|YP_821243.1|STER_1937|hypothetical protein STER_1937 [Streptococcus thermophilus LMD-9]_hit-name:citB _hit-score:27_hit-evalue:0.044_identity-percent:29.6296296296296	0	0	0	1	2	0	0	0
197	GFTDETVRFNLNDGDKNEISNTLTNVYR	T6:+79.96633	b16.a1	gi|116628624|ref|YP_821243.1|STER_1937|hypothetical protein STER_1937 [Streptococcus thermophilus LMD-9]_hit-name:citB _hit-score:27_hit-evalue:0.044_identity-percent:29.6296296296296	0	0	0	0	1	0	1	0
198	GFTDETVRFNLNDGDKNEISNTLTNVYR	T3:+79.96633	b16.a1	gi|116628624|ref|YP_821243.1|STER_1937|hypothetical protein STER_1937 [Streptococcus thermophilus LMD-9]_hit-name:citB _hit-score:27_hit-evalue:0.044_identity-percent:29.6296296296296	0	0	0	0	0	0	1	0
199	GFTDETVRFNLNDGDKNEISNTLTNVYR	T6:+79.96633 - G1:+42.01057	b16.a1	gi|116628624|ref|YP_821243.1|STER_1937|hypothetical protein STER_1937 [Streptococcus thermophilus LMD-9]_hit-name:citB _hit-score:27_hit-evalue:0.044_identity-percent:29.6296296296296	0	0	0	0	0	1	0	0
200	DFHIVAETGIHAR	T8:+79.96633	b17.a1	gi|116628008|ref|YP_820627.1|STER_1243|Phosphotransferase system, HPr-related protein [Streptococcus thermophilus LMD-9]_hit-name:ptsH _hit-score:146_hit-evalue:7e-38_identity-percent:88.5057471264368	4	3	0	1	3	2	5	0
201	SIMGVMSLGVGQGADVTISAEGPDADDAIAAIAETMTK	T17:+79.96633	b17.a2	gi|116628008|ref|YP_820627.1|STER_1243|Phosphotransferase system, HPr-related protein [Streptococcus thermophilus LMD-9]_hit-name:ptsH _hit-score:146_hit-evalue:7e-38_identity-percent:88.5057471264368	0	0	0	0	1	0	0	0
202	FASDITLEYK	S3:+79.96633	b17.a3	gi|116628008|ref|YP_820627.1|STER_1243|Phosphotransferase system, HPr-related protein [Streptococcus thermophilus LMD-9]_hit-name:ptsH _hit-score:146_hit-evalue:7e-38_identity-percent:88.5057471264368	0	0	0	0	0	0	0	1
203	EASILELNDLVK	S3:+79.96633	b18.a1	gi|116627418|ref|YP_820037.1|STER_0568|rplL|Ribosomal protein L7/L12 [Streptococcus thermophilus LMD-9]_hit-name:rplL _hit-score:125_hit-evalue:2e-31_identity-percent:68.5714285714286	2	1	2	0	1	1	0	3
204	AIVDGAPSVIK	S8:+79.96633	b18.a2	gi|116627418|ref|YP_820037.1|STER_0568|rplL|Ribosomal protein L7/L12 [Streptococcus thermophilus LMD-9]_hit-name:rplL _hit-score:125_hit-evalue:2e-31_identity-percent:68.5714285714286	1	0	0	0	0	0	0	0
205	EGVSAAEAEEIK	S4:+79.96633	b18.a2	gi|116627418|ref|YP_820037.1|STER_0568|rplL|Ribosomal protein L7/L12 [Streptococcus thermophilus LMD-9]_hit-name:rplL _hit-score:125_hit-evalue:2e-31_identity-percent:68.5714285714286	0	2	0	0	2	0	0	1
206	DSFDVELTSAGDK	S9:+79.96633	b18.a3	gi|116627418|ref|YP_820037.1|STER_0568|rplL|Ribosomal protein L7/L12 [Streptococcus thermophilus LMD-9]_hit-name:rplL _hit-score:125_hit-evalue:2e-31_identity-percent:68.5714285714286	1	0	0	0	0	0	0	0
207	DSFDVELTSAGDK	S2:+79.96633	b18.a3	gi|116627418|ref|YP_820037.1|STER_0568|rplL|Ribosomal protein L7/L12 [Streptococcus thermophilus LMD-9]_hit-name:rplL _hit-score:125_hit-evalue:2e-31_identity-percent:68.5714285714286	1	0	0	0	0	0	0	0
208	DSFDVELTSAGDK	T8:+79.96633	b18.a3	gi|116627418|ref|YP_820037.1|STER_0568|rplL|Ribosomal protein L7/L12 [Streptococcus thermophilus LMD-9]_hit-name:rplL _hit-score:125_hit-evalue:2e-31_identity-percent:68.5714285714286	0	1	0	0	1	0	0	0
209	VTPQPNRIPVENTVEVPQPVDGENHEQK	T13:+79.96633	b19.a1	gi|116627604|ref|YP_820223.1|STER_0776|Actin-like ATPase involved in cell division [Streptococcus thermophilus LMD-9]_hit-name:ftsA _hit-score:850_hit-evalue:0.0_identity-percent:96.5065502183406	0	0	0	0	0	2	1	1
210	IPVENTVEVPQPVDGENHEQK	T6:+79.96633	b19.a1	gi|116627604|ref|YP_820223.1|STER_0776|Actin-like ATPase involved in cell division [Streptococcus thermophilus LMD-9]_hit-name:ftsA _hit-score:850_hit-evalue:0.0_identity-percent:96.5065502183406	0	0	0	0	2	2	1	2
211	QLINDYEETHASTIAVMPVSSEEVSAYGVIAPQGK	S20:+79.96633	b20.a1	gi|116628515|ref|YP_821134.1|STER_1810|UDP-glucose pyrophosphorylase [Streptococcus thermophilus LMD-9]_hit-name:galU _hit-score:595_hit-evalue:1e-172_identity-percent:98.3552631578947	1	0	1	1	0	1	0	1
212	QLINDYEETHASTIAVMPVSSEEVSAYGVIAPQGK	S21:+79.96633	b20.a1	gi|116628515|ref|YP_821134.1|STER_1810|UDP-glucose pyrophosphorylase [Streptococcus thermophilus LMD-9]_hit-name:galU _hit-score:595_hit-evalue:1e-172_identity-percent:98.3552631578947	1	1	1	1	1	0	2	0
213	QLINDYEETHASTIAVMPVSSEEVSAYGVIAPQGK	M17:+15.99491 - S20:+79.96633	b20.a1	gi|116628515|ref|YP_821134.1|STER_1810|UDP-glucose pyrophosphorylase [Streptococcus thermophilus LMD-9]_hit-name:galU _hit-score:595_hit-evalue:1e-172_identity-percent:98.3552631578947	0	0	0	0	1	0	0	0
214	QLINDYEETHASTIAVMPVSSEEVSAYGVIAPQGK	M17:+15.99491 - S20:+79.96633 - Q1:-17.02655	b20.a1	gi|116628515|ref|YP_821134.1|STER_1810|UDP-glucose pyrophosphorylase [Streptococcus thermophilus LMD-9]_hit-name:galU _hit-score:595_hit-evalue:1e-172_identity-percent:98.3552631578947	0	1	0	0	0	0	0	0
215	NPQTGETISIAASK	S9:+79.96633	b21.a1	gi|116627943|ref|YP_820562.1|STER_1175|nucleoid DNA-binding protein [Streptococcus thermophilus LMD-9]_hit-name:hstH _hit-score:142_hit-evalue:7e-37_identity-percent:84.6153846153846	1	1	2	1	2	2	1	2
216	NLSIPQETEILK	T8:+79.96633	b22.a1	gi|116627174|ref|YP_819793.1|STER_0288|Predicted periplasmic solute-binding protein [Streptococcus thermophilus LMD-9]_hit-name:pabC _hit-score:1149_hit-evalue:0.0_identity-percent:91.1854103343465	0	0	0	0	1	2	1	2
217	HNEYSESAEDSLSFK	S11:+79.96633	b22.a2	gi|116627174|ref|YP_819793.1|STER_0288|Predicted periplasmic solute-binding protein [Streptococcus thermophilus LMD-9]_hit-name:pabC _hit-score:1149_hit-evalue:0.0_identity-percent:91.1854103343465	0	0	0	0	2	1	0	0
218	EAIYTNPK	Y4:+79.96633	b22.a3	gi|116627174|ref|YP_819793.1|STER_0288|Predicted periplasmic solute-binding protein [Streptococcus thermophilus LMD-9]_hit-name:pabC _hit-score:1149_hit-evalue:0.0_identity-percent:91.1854103343465	0	0	0	0	0	2	0	0
219	LANDEESIMAFVQAMK	S7:+79.96633	b23.a1	gi|116627321|ref|YP_819940.1|STER_0461|tRNA nucleotidyltransferase/poly(A) polymerase [Streptococcus thermophilus LMD-9]_hit-name:papL _hit-score:787_hit-evalue:0.0_identity-percent:99.2537313432836	2	2	1	0	2	1	1	1
220	KDTSDSSSNQSTVVIK	S4:+79.96633 - T3:+79.96633	b24.a1	gi|116627311|ref|YP_819930.1|STER_0449|hypothetical protein STER_0449 [Streptococcus thermophilus LMD-9]_hit-name:cbpD3 _hit-score:25_hit-evalue:0.60_identity-percent:42.8571428571429	0	5	0	1	7	0	3	0
221	NTTIPTSK	T3:+79.96633	b25.a1	gi|116627083|ref|YP_819702.1|STER_0163|Molecular chaperone [Streptococcus thermophilus LMD-9]_hit-name:dnaK _hit-score:1061_hit-evalue:0.0_identity-percent:92.5864909390445	0	0	0	1	0	1	0	0
222	LYEQAAAAQQAQAGAEGAQATDNSGDDVVDGEFTEK	S24:+79.96633	b25.a2	gi|116627083|ref|YP_819702.1|STER_0163|Molecular chaperone [Streptococcus thermophilus LMD-9]_hit-name:dnaK _hit-score:1061_hit-evalue:0.0_identity-percent:92.5864909390445	1	0	0	0	1	0	1	0
223	EQTIVIQSNSGLTDEEIER	S10:+79.96633	b25.a3	gi|116627083|ref|YP_819702.1|STER_0163|Molecular chaperone [Streptococcus thermophilus LMD-9]_hit-name:dnaK _hit-score:1061_hit-evalue:0.0_identity-percent:92.5864909390445	0	1	0	0	0	0	0	0
224	EQTIVIQSNSGLTDEEIER	S8:+79.96633	b25.a3	gi|116627083|ref|YP_819702.1|STER_0163|Molecular chaperone [Streptococcus thermophilus LMD-9]_hit-name:dnaK _hit-score:1061_hit-evalue:0.0_identity-percent:92.5864909390445	0	0	0	0	0	0	0	1
225	VTKAVITVPAYFNDAQR	T2:+79.96633 - T7:+79.96633	b25.a4	gi|116627083|ref|YP_819702.1|STER_0163|Molecular chaperone [Streptococcus thermophilus LMD-9]_hit-name:dnaK _hit-score:1061_hit-evalue:0.0_identity-percent:92.5864909390445	0	1	0	0	0	0	0	0
226	FQAAAGQLDQTAR	T11:+79.96633	b26.a1	gi|116628590|ref|YP_821209.1|STER_1899|Ribosomal protein L29 [Streptococcus thermophilus LMD-9]_hit-name:rpmC _hit-score:98_hit-evalue:2e-23_identity-percent:79.4117647058823	0	0	0	0	2	2	2	2
227	GLSQEELAK	S3:+79.96633	b26.a2	gi|116628590|ref|YP_821209.1|STER_1899|Ribosomal protein L29 [Streptococcus thermophilus LMD-9]_hit-name:rpmC _hit-score:98_hit-evalue:2e-23_identity-percent:79.4117647058823	1	0	0	0	0	0	0	1
228	FSVATSENEVK	T5:+79.96633	b27.a1	gi|116628117|ref|YP_820736.1|STER_1367|Na+/xyloside symporter or related transporter [Streptococcus thermophilus LMD-9]_hit-name:lacS _hit-score:1133_hit-evalue:0.0_identity-percent:91.1671924290221	0	0	0	0	1	2	0	0
229	ANVVSLVTPTTGYLVDLSSVNDEHFASGSMGK	S18:+79.96633	b27.a2	gi|116628117|ref|YP_820736.1|STER_1367|Na+/xyloside symporter or related transporter [Streptococcus thermophilus LMD-9]_hit-name:lacS _hit-score:1133_hit-evalue:0.0_identity-percent:91.1671924290221	0	0	0	0	1	0	0	0
230	ANVVSLVTPTTGYLVDLSSVNDEHFASGSMGK	T8:+79.96633	b27.a2	gi|116628117|ref|YP_820736.1|STER_1367|Na+/xyloside symporter or related transporter [Streptococcus thermophilus LMD-9]_hit-name:lacS _hit-score:1133_hit-evalue:0.0_identity-percent:91.1671924290221	0	0	0	0	1	0	0	0
231	ANVVSLVTPTTGYLVDLSSVNDEHFASGSMGK	S19:+79.96633	b27.a2	gi|116628117|ref|YP_820736.1|STER_1367|Na+/xyloside symporter or related transporter [Streptococcus thermophilus LMD-9]_hit-name:lacS _hit-score:1133_hit-evalue:0.0_identity-percent:91.1671924290221	0	0	0	0	0	1	0	0
232	NGLDDTVLVTVTNSEK	T6:+79.96633	b27.a3	gi|116628117|ref|YP_820736.1|STER_1367|Na+/xyloside symporter or related transporter [Streptococcus thermophilus LMD-9]_hit-name:lacS _hit-score:1133_hit-evalue:0.0_identity-percent:91.1671924290221	0	0	0	0	1	0	0	0
233	LDAALAASQDELSVIREK	S13:+79.96633	b28.a1	gi|116628007|ref|YP_820626.1|STER_1242|Phosphoenolpyruvate-protein kinase (PTS system EI component in bacteria) [Streptococcus thermophilus LMD-9]_hit-name:ptsI _hit-score:1082_hit-evalue:0.0_identity-percent:97.5736568457539	1	0	1	0	2	2	0	1
234	LDAALAASQDELSVIREK	S8:+79.96633	b28.a1	gi|116628007|ref|YP_820626.1|STER_1242|Phosphoenolpyruvate-protein kinase (PTS system EI component in bacteria) [Streptococcus thermophilus LMD-9]_hit-name:ptsI _hit-score:1082_hit-evalue:0.0_identity-percent:97.5736568457539	1	0	0	0	0	0	0	0
235	ASADELQAIIDEAWKNPEFQEASK	S23:+79.96633	b29.a1	gi|116628019|ref|YP_820638.1|STER_1257|ldh|L-lactate dehydrogenase [Streptococcus thermophilus LMD-9]_hit-name:ldh _hit-score:642_hit-evalue:0.0_identity-percent:100	0	4	0	3	1	0	4	0
236	MKASADELQAIIDEAWKNPEFQEASK	S25:+79.96633	b29.a1	gi|116628019|ref|YP_820638.1|STER_1257|ldh|L-lactate dehydrogenase [Streptococcus thermophilus LMD-9]_hit-name:ldh _hit-score:642_hit-evalue:0.0_identity-percent:100	0	0	0	1	0	0	0	0
237	AVGDALDLSHALPFTSPK	S9:+79.96633	b29.a2	gi|116628019|ref|YP_820638.1|STER_1257|ldh|L-lactate dehydrogenase [Streptococcus thermophilus LMD-9]_hit-name:ldh _hit-score:642_hit-evalue:0.0_identity-percent:100	0	0	0	0	1	0	0	0
238	MTTENIGEIVIAPR	M1:+15.99491 - T3:+79.96633 - M1:+42.01057	b30.a1	gi|116628434|ref|YP_821053.1|STER_1714|hypothetical protein STER_1714 [Streptococcus thermophilus LMD-9]_hit-name:asp _hit-score:52_hit-evalue:3e-09_identity-percent:28.9719626168224	0	0	1	0	0	1	0	1
239	MTTENIGEIVIAPR	M1:+15.99491 - T2:+79.96633 - M1:+42.01057	b30.a1	gi|116628434|ref|YP_821053.1|STER_1714|hypothetical protein STER_1714 [Streptococcus thermophilus LMD-9]_hit-name:asp _hit-score:52_hit-evalue:3e-09_identity-percent:28.9719626168224	2	0	2	0	0	0	0	0
240	SDVQKTQVLR	T6:+79.96633	b31.a1	gi|116627607|ref|YP_820226.1|STER_0779|Cell division protein [Streptococcus thermophilus LMD-9]_hit-name:int _hit-score:27_hit-evalue:0.22_identity-percent:29.5454545454545	0	0	0	0	1	2	2	2
241	MAESIAGQK	S4:+79.96633	b32.a1	gi|116627931|ref|YP_820550.1|STER_1163|Pyruvate kinase [Streptococcus thermophilus LMD-9]_hit-name:pyk _hit-score:909_hit-evalue:0.0_identity-percent:94.2	0	1	0	1	2	0	1	1
242	LIVALTESGNTAR	S8:+79.96633	b32.a2	gi|116627931|ref|YP_820550.1|STER_1163|Pyruvate kinase [Streptococcus thermophilus LMD-9]_hit-name:pyk _hit-score:909_hit-evalue:0.0_identity-percent:94.2	0	1	0	0	0	0	1	1
243	LIVALTESGNTAR	T6:+79.96633	b32.a2	gi|116627931|ref|YP_820550.1|STER_1163|Pyruvate kinase [Streptococcus thermophilus LMD-9]_hit-name:pyk _hit-score:909_hit-evalue:0.0_identity-percent:94.2	0	1	0	0	0	0	0	0
244	VALESGLVESGDNIVIVAGIPVGSGNTNTMR	S10:+79.96633	b32.a3	gi|116627931|ref|YP_820550.1|STER_1163|Pyruvate kinase [Streptococcus thermophilus LMD-9]_hit-name:pyk _hit-score:909_hit-evalue:0.0_identity-percent:94.2	0	0	0	0	0	1	0	0
245	SFSFDSASVQGAVIK	S6:+79.96633	b33.a1	gi|116627605|ref|YP_820224.1|STER_0777|Cell division GTPase [Streptococcus thermophilus LMD-9]_hit-name:ftsZ _hit-score:718_hit-evalue:0.0_identity-percent:87.0454545454545	0	0	0	0	0	2	0	0
246	KVTTAPSQSSVPNQQVAQEQQR	S7:+79.96633	b33.a2	gi|116627605|ref|YP_820224.1|STER_0777|Cell division GTPase [Streptococcus thermophilus LMD-9]_hit-name:ftsZ _hit-score:718_hit-evalue:0.0_identity-percent:87.0454545454545	0	0	0	0	0	0	1	0
247	KVTTAPSQSSVPNQQVAQEQQR	S9:+79.96633	b33.a2	gi|116627605|ref|YP_820224.1|STER_0777|Cell division GTPase [Streptococcus thermophilus LMD-9]_hit-name:ftsZ _hit-score:718_hit-evalue:0.0_identity-percent:87.0454545454545	0	0	1	0	0	0	0	1
248	RDNIVQAIEEGLSQTQELENQNEK	S13:+79.96633	b34.a1	gi|116627378|ref|YP_819997.1|STER_0523|cell division membrane protein [Streptococcus thermophilus LMD-9]_hit-name:ftsW _hit-score:744_hit-evalue:0.0_identity-percent:90.3755868544601	0	0	0	0	1	0	0	0
249	RDNIVQAIEEGLSQTQELENQNEK	T15:+79.96633	b34.a1	gi|116627378|ref|YP_819997.1|STER_0523|cell division membrane protein [Streptococcus thermophilus LMD-9]_hit-name:ftsW _hit-score:744_hit-evalue:0.0_identity-percent:90.3755868544601	0	0	0	0	0	1	1	2
250	DNIVQAIEEGLSQTQELENQNEK	T14:+79.96633	b34.a1	gi|116627378|ref|YP_819997.1|STER_0523|cell division membrane protein [Streptococcus thermophilus LMD-9]_hit-name:ftsW _hit-score:744_hit-evalue:0.0_identity-percent:90.3755868544601	0	0	0	0	0	0	1	0
251	DNIVQAIEEGLSQTQELENQNEK	S12:+79.96633	b34.a1	gi|116627378|ref|YP_819997.1|STER_0523|cell division membrane protein [Streptococcus thermophilus LMD-9]_hit-name:ftsW _hit-score:744_hit-evalue:0.0_identity-percent:90.3755868544601	0	0	0	0	0	0	0	1
252	GYAQNNPIVEYQSESFK	Y2:+79.96633	b35.a1	gi|116628425|ref|YP_821044.1|STER_1705|secA|Preprotein translocase subunit SecA (ATPase, RNA helicase) [Streptococcus thermophilus LMD-9]_hit-name:secA _hit-score:1643_hit-evalue:0.0_identity-percent:98.5865724381625	1	0	0	0	1	1	0	2
253	VSTTATGNIQAHQADANGQEIDFSK	T4:+79.96633	b35.a2	gi|116628425|ref|YP_821044.1|STER_1705|secA|Preprotein translocase subunit SecA (ATPase, RNA helicase) [Streptococcus thermophilus LMD-9]_hit-name:secA _hit-score:1643_hit-evalue:0.0_identity-percent:98.5865724381625	0	0	0	0	1	0	0	0
254	VSTTATGNIQAHQADANGQEIDFSK	T6:+79.96633	b35.a2	gi|116628425|ref|YP_821044.1|STER_1705|secA|Preprotein translocase subunit SecA (ATPase, RNA helicase) [Streptococcus thermophilus LMD-9]_hit-name:secA _hit-score:1643_hit-evalue:0.0_identity-percent:98.5865724381625	0	0	0	0	0	2	1	0
255	KPVEETSVPVGHK	T6:+79.96633	b36.a1	gi|116627594|ref|YP_820213.1|STER_0765|hypothetical protein STER_0765 [Streptococcus thermophilus LMD-9]_hit-name:tnpSth1 _hit-score:30_hit-evalue:0.062_identity-percent:20.4081632653061	0	0	0	0	0	2	1	0
256	KPVEETSVPVGHK	S7:+79.96633	b36.a1	gi|116627594|ref|YP_820213.1|STER_0765|hypothetical protein STER_0765 [Streptococcus thermophilus LMD-9]_hit-name:tnpSth1 _hit-score:30_hit-evalue:0.062_identity-percent:20.4081632653061	0	0	0	0	0	0	0	1
257	SFIDKGELVPDEVTNGIVK	S1:+79.96633	b37.a1	gi|116628577|ref|YP_821196.1|STER_1886|Adenylate kinase [Streptococcus thermophilus LMD-9]_hit-name:adk _hit-score:433_hit-evalue:1e-123_identity-percent:99.5412844036697	1	3	0	0	3	2	0	0
258	IGETHEGASQMDWMEQEQER	T4:+79.96633	b38.a1	gi|116628478|ref|YP_821097.1|STER_1762|Translation elongation factor (GTPase) [Streptococcus thermophilus LMD-9]_hit-name:fus _hit-score:1366_hit-evalue:0.0_identity-percent:100	0	0	0	0	2	1	2	1
259	IGETHEGASQMDWMEQEQER	S9:+79.96633	b38.a1	gi|116628478|ref|YP_821097.1|STER_1762|Translation elongation factor (GTPase) [Streptococcus thermophilus LMD-9]_hit-name:fus _hit-score:1366_hit-evalue:0.0_identity-percent:100	0	0	1	0	0	0	0	0
260	EIVHLGLEDNNFDSDINPLETTGAYLSPK	T21:+79.96633	b39.a1	gi|116627434|ref|YP_820053.1|STER_0588|Predicted sulfurtransferase [Streptococcus thermophilus LMD-9]_hit-name:rheB _hit-score:28_hit-evalue:0.27_identity-percent:44.7368421052632	0	0	0	0	1	1	2	0
261	EIVHLGLEDNNFDSDINPLETTGAYLSPK	T22:+79.96633	b39.a1	gi|116627434|ref|YP_820053.1|STER_0588|Predicted sulfurtransferase [Streptococcus thermophilus LMD-9]_hit-name:rheB _hit-score:28_hit-evalue:0.27_identity-percent:44.7368421052632	0	0	0	0	0	0	0	1
262	FDSILTDNGATVVESK	S3:+79.96633	b40.a1	gi|116628446|ref|YP_821065.1|STER_1728|rpsF|Ribosomal protein S6 [Streptococcus thermophilus LMD-9]_hit-name:rpsF _hit-score:190_hit-evalue:4e-51_identity-percent:98.9583333333333	1	0	2	0	0	1	0	2
263	TGTVTMDVAK	T5:+79.96633	b41.a1	gi|116628505|ref|YP_821124.1|STER_1797|rplA|Ribosomal protein L1 [Streptococcus thermophilus LMD-9]_hit-name:rplA _hit-score:417_hit-evalue:1e-119_identity-percent:94.7598253275109	1	0	0	0	4	0	0	0
264	HSNETVEFEGETYPLIR	T5:+79.96633	b42.a1	gi|116627614|ref|YP_820233.1|STER_0787|rpmE2|Ribosomal protein L31 [Streptococcus thermophilus LMD-9]_hit-name:rpmE _hit-score:169_hit-evalue:5e-45_identity-percent:100	0	0	0	0	1	0	0	0
265	HSNETVEFEGETYPLIR	S2:+79.96633	b42.a1	gi|116627614|ref|YP_820233.1|STER_0787|rpmE2|Ribosomal protein L31 [Streptococcus thermophilus LMD-9]_hit-name:rpmE _hit-score:169_hit-evalue:5e-45_identity-percent:100	0	0	0	0	0	1	0	0
266	VEISSDSHPFYTGR	S4:+79.96633	b42.a2	gi|116627614|ref|YP_820233.1|STER_0787|rpmE2|Ribosomal protein L31 [Streptococcus thermophilus LMD-9]_hit-name:rpmE _hit-score:169_hit-evalue:5e-45_identity-percent:100	1	0	0	0	0	1	0	0
267	MNTDETITIYDVAR	M1:+15.99491 - T3:+79.96633 - M1:+42.01057	b43.a1	gi|116627515|ref|YP_820134.1|STER_0679|catabolite control protein A [Streptococcus thermophilus LMD-9]_hit-name:tnp1191 _hit-score:_hit-evalue:0.042_identity-percent:34.1463414634146	1	0	0	0	0	1	0	0
268	TGKLPGNQGEAVNPTQQHGPK	T1:+79.96633	b44.a1	gi|116628305|ref|YP_820924.1|STER_1578|ATP-binding subunit of Clp protease and DnaK/DnaJ chaperones [Streptococcus thermophilus LMD-9]_hit-name:clpL _hit-score:1241_hit-evalue:0.0_identity-percent:93.7134502923977	0	0	3	0	0	0	0	0
269	LIGTTAGYVGYDDNSNTLTER	T4:+79.96633	b44.a2	gi|116628305|ref|YP_820924.1|STER_1578|ATP-binding subunit of Clp protease and DnaK/DnaJ chaperones [Streptococcus thermophilus LMD-9]_hit-name:clpL _hit-score:1241_hit-evalue:0.0_identity-percent:93.7134502923977	0	0	0	0	0	0	0	1
270	LIGTTAGYVGYDDNSNTLTER	S15:+79.96633	b44.a2	gi|116628305|ref|YP_820924.1|STER_1578|ATP-binding subunit of Clp protease and DnaK/DnaJ chaperones [Streptococcus thermophilus LMD-9]_hit-name:clpL _hit-score:1241_hit-evalue:0.0_identity-percent:93.7134502923977	0	0	0	0	0	0	0	1
271	SQLDFDTNTITEK	T9:+79.96633	b45.a1	gi|116627632|ref|YP_820251.1|STER_0808|Cation transport ATPase [Streptococcus thermophilus LMD-9]_hit-name:pacL1 _hit-score:1602_hit-evalue:0.0_identity-percent:95.6719817767654	0	0	0	0	1	2	1	0
272	YMNEKPVAK	Y1:+79.96633	b45.a2	gi|116627632|ref|YP_820251.1|STER_0808|Cation transport ATPase [Streptococcus thermophilus LMD-9]_hit-name:pacL1 _hit-score:1602_hit-evalue:0.0_identity-percent:95.6719817767654	0	0	0	0	1	0	0	0
273	SGTTTEPAIAFR	T4:+79.96633	b46.a1	gi|116627134|ref|YP_819753.1|STER_0241|p gi|Glucose-6-phosphate isomerase [Streptococcus thermophilus LMD-9]_hit-name:pgi _hit-score:890_hit-evalue:0.0_identity-percent:100	0	0	1	0	1	0	1	0
274	ATETTEEVVEETKETSELEEAQAR	T4:+79.96633 - A1:+42.01056	b47.a1	gi|116627082|ref|YP_819701.1|STER_0162|Molecular chaperone GrpE (heat shock protein) [Streptococcus thermophilus LMD-9]_hit-name:grpE _hit-score:252_hit-evalue:3e-69_identity-percent:91.4893617021277	1	0	0	0	0	0	0	0
275	ATETTEEVVEETKETSELEEAQAR	T2:+79.96633 - A1:+42.01056	b47.a1	gi|116627082|ref|YP_819701.1|STER_0162|Molecular chaperone GrpE (heat shock protein) [Streptococcus thermophilus LMD-9]_hit-name:grpE _hit-score:252_hit-evalue:3e-69_identity-percent:91.4893617021277	1	0	0	0	0	1	0	0
276	YFESLEEFSEGEMK	S9:+79.96633	b48.a1	gi|116628116|ref|YP_820735.1|STER_1366|Beta-galactosidase [Streptococcus thermophilus LMD-9]_hit-name:lacZ _hit-score:2081_hit-evalue:0.0_identity-percent:98.5380116959064	0	0	0	0	2	2	1	0
277	ANGALELVIKPYDTYQIFDSNGEPISSEQK	S26:+79.96633	b49.a1	gi|116627484|ref|YP_820103.1|STER_0644|Peptidoglycan interpeptide bridge formation enzyme [Streptococcus thermophilus LMD-9]_hit-name:murN _hit-score:815_hit-evalue:0.0_identity-percent:99.0267639902676	0	1	0	0	0	1	0	0
278	ANGALELVIKPYDTYQIFDSNGEPISSEQK	S27:+79.96633	b49.a1	gi|116627484|ref|YP_820103.1|STER_0644|Peptidoglycan interpeptide bridge formation enzyme [Streptococcus thermophilus LMD-9]_hit-name:murN _hit-score:815_hit-evalue:0.0_identity-percent:99.0267639902676	0	0	0	0	0	1	0	0
279	VTSASASRPAYASATSEPSHATGNIASASNYDILK	S13:+79.96633	b50.a1	gi|116627168|ref|YP_819787.1|STER_0280|Cell division initiation protein [Streptococcus thermophilus LMD-9]_hit-name:divIVA _hit-score:44_hit-evalue:9e-07_identity-percent:40	0	0	0	0	1	0	0	0
280	VAEIGVSYAGTPVLAHELASK	S20:+79.96633	b51.a1	gi|116627945|ref|YP_820564.1|STER_1178|hypothetical protein STER_1178 [Streptococcus thermophilus LMD-9]_hit-name:obg _hit-score:27_hit-evalue:0.29_identity-percent:26.4367816091954	0	0	0	0	0	1	0	0
281	VAEIGVSYAGTPVLAHELASK	T11:+79.96633	b51.a1	gi|116627945|ref|YP_820564.1|STER_1178|hypothetical protein STER_1178 [Streptococcus thermophilus LMD-9]_hit-name:obg _hit-score:27_hit-evalue:0.29_identity-percent:26.4367816091954	1	0	0	0	0	1	0	0
282	TIEPELVEK	T1:+79.96633 - T1:+42.01056	b51.a2	gi|116627945|ref|YP_820564.1|STER_1178|hypothetical protein STER_1178 [Streptococcus thermophilus LMD-9]_hit-name:obg _hit-score:27_hit-evalue:0.29_identity-percent:26.4367816091954	0	0	0	0	1	0	0	0
283	DGGVDIVTSSLPSDIKDAVVK	T8:+79.96633	b52.a1	gi|116627672|ref|YP_820291.1|STER_0856|Uncharacterized ABC-type transport system, periplasmic component/surface lipoprotein [Streptococcus thermophilus LMD-9]_hit-name:ileS _hit-score:26_hit-evalue:1.1_identity-percent:21.6216216216216	0	0	0	0	0	1	2	0
284	GATVTGSGKPATLETGLVVNVPDFIEAGQK	T5:+79.96633	b53.a1	gi|116628435|ref|YP_821054.1|STER_1715|Translation elongation factor P (EF-P)/translation initiation factor 5A (eIF-5A) [Streptococcus thermophilus LMD-9]_hit-name:efp _hit-score:328_hit-evalue:3e-92_identity-percent:90.8602150537634	0	0	0	0	1	0	0	1
285	GATVTGSGKPATLETGLVVNVPDFIEAGQK	T3:+79.96633	b53.a1	gi|116628435|ref|YP_821054.1|STER_1715|Translation elongation factor P (EF-P)/translation initiation factor 5A (eIF-5A) [Streptococcus thermophilus LMD-9]_hit-name:efp _hit-score:328_hit-evalue:3e-92_identity-percent:90.8602150537634	0	0	0	0	0	0	1	0
286	GATVTGSGKPATLETGLVVNVPDFIEAGQK	S7:+79.96633	b53.a1	gi|116628435|ref|YP_821054.1|STER_1715|Translation elongation factor P (EF-P)/translation initiation factor 5A (eIF-5A) [Streptococcus thermophilus LMD-9]_hit-name:efp _hit-score:328_hit-evalue:3e-92_identity-percent:90.8602150537634	0	0	0	0	1	0	0	0
287	LMMETIMKWSDQAYGIK	S10:+79.96633 - T5:+79.96633 - Y14:+79.96633	b54.a1	gi|116628119|ref|YP_820738.1|STER_1369|UDP-glucose 4-epimerase [Streptococcus thermophilus LMD-9]_hit-name:galE1 _hit-score:674_hit-evalue:0.0_identity-percent:99.3993993993994	0	1	0	1	1	0	0	0
288	SNTATFNTSQNLK	T8:+79.96633	b55.a1	gi|116627463|ref|YP_820082.1|STER_0618|Predicted membrane protein, hemolysin III homolog [Streptococcus thermophilus LMD-9]_hit-name:hlyIII _hit-score:428_hit-evalue:1e-122_identity-percent:94.6666666666667	0	0	0	0	0	0	0	1
289	TTNYQDDQGLNSNSIK	T2:+79.96633	b56.a1	gi|116627556|ref|YP_820175.1|STER_0723|hypothetical protein STER_0723 [Streptococcus thermophilus LMD-9]_hit-name:sthII _hit-score:20_hit-evalue:6.6_identity-percent:25.7142857142857	0	0	0	0	0	1	0	0
290	EHWGDLSKDYELSK	S7:+79.96633 - E1:+42.01056	b57.a1	gi|116628347|ref|YP_820966.1|STER_1623|Carbonic anhydrase [Streptococcus thermophilus LMD-9]_hit-name:cah _hit-score:498_hit-evalue:1e-143_identity-percent:93.0769230769231	0	0	0	0	2	0	0	0
291	KSQEVQWGYTGITGPEHWGDLSK	S2:+79.96633 - Y9:+79.96633	b57.a1	gi|116628347|ref|YP_820966.1|STER_1623|Carbonic anhydrase [Streptococcus thermophilus LMD-9]_hit-name:cah _hit-score:498_hit-evalue:1e-143_identity-percent:93.0769230769231	0	0	0	0	1	0	0	0
292	AKENENLESTEETVEEVVADKDTEQEQLNR	T10:+79.96633	b58.a1	gi|116627350|ref|YP_819969.1|STER_0492|Parvulin-like peptidyl-prolyl isomerase [Streptococcus thermophilus LMD-9]_hit-name:prtM _hit-score:506_hit-evalue:1e-145_identity-percent:89.0728476821192	0	0	0	0	1	1	0	0
293	AKENENLESTEETVEEVVADKDTEQEQLNR	S9:+79.96633	b58.a1	gi|116627350|ref|YP_819969.1|STER_0492|Parvulin-like peptidyl-prolyl isomerase [Streptococcus thermophilus LMD-9]_hit-name:prtM _hit-score:506_hit-evalue:1e-145_identity-percent:89.0728476821192	0	0	0	0	1	0	0	0
294	VTVEMSPYDLTR	Y8:+79.96633	b59.a1	gi|116628576|ref|YP_821195.1|STER_1885|infA|Translation initiation factor 1 [Streptococcus thermophilus LMD-9]_hit-name:tnp1239 _hit-score:26_hit-evalue:0.096_identity-percent:35.7142857142857	0	1	0	0	1	0	0	1
295	LTAPSVQFDETTGDYSR	T2:+79.96633	b60.a1	gi|116628639|ref|YP_821258.1|STER_1953|rpmF|Ribosomal protein L32 [Streptococcus thermophilus LMD-9]_hit-name:rpmF _hit-score:123_hit-evalue:6e-31_identity-percent:100	0	0	0	0	1	0	0	0
296	LTAPSVQFDETTGDYSR	T12:+79.96633	b60.a1	gi|116628639|ref|YP_821258.1|STER_1953|rpmF|Ribosomal protein L32 [Streptococcus thermophilus LMD-9]_hit-name:rpmF _hit-score:123_hit-evalue:6e-31_identity-percent:100	0	0	0	0	1	0	0	0
297	LTAPSVQFDETTGDYSR	S5:+79.96633	b60.a1	gi|116628639|ref|YP_821258.1|STER_1953|rpmF|Ribosomal protein L32 [Streptococcus thermophilus LMD-9]_hit-name:rpmF _hit-score:123_hit-evalue:6e-31_identity-percent:100	0	0	0	0	0	0	0	1
298	DYDSQIAATNNAISNLASQQEAAQAQVATIQSQVSTLR	S14:+79.96633 - D1:+42.01056	b61.a1	gi|116626992|ref|YP_819611.1|STER_0042|Surface antigen [Streptococcus thermophilus LMD-9]_hit-name:pcsB _hit-score:192_hit-evalue:7e-51_identity-percent:80.8695652173913	0	0	0	0	2	0	0	0
299	DYDSQIAATNNAISNLASQQEAAQAQVATIQSQVSTLR	S18:+79.96633 - D1:+42.01056	b61.a1	gi|116626992|ref|YP_819611.1|STER_0042|Surface antigen [Streptococcus thermophilus LMD-9]_hit-name:pcsB _hit-score:192_hit-evalue:7e-51_identity-percent:80.8695652173913	0	0	0	0	0	0	1	0
300	MTLASQIASDLLDIK	M1:+15.99491 - T2:+79.96633	b62.a1	gi|116627774|ref|YP_820393.1|STER_0981|pyrE|Orotate phosphoribosyltransferase [Streptococcus thermophilus LMD-9]_hit-name:pyrE _hit-score:408_hit-evalue:1e-116_identity-percent:99.5215311004785	0	0	2	0	0	0	0	1
301	DPENPLNQFNQAGGSNFFDDFFSDLNNFR	S15:+79.96633	b63.a1	gi|116627487|ref|YP_820106.1|STER_0648|ATP-binding subunit of Clp protease and DnaK/DnaJ chaperones [Streptococcus thermophilus LMD-9]_hit-name:clpE _hit-score:1377_hit-evalue:0.0_identity-percent:94.1489361702128	0	1	0	1	0	0	1	0
302	GLPAQYGGFETFVDQLVSNR	Y6:+79.96633	b65.a1	gi|116628176|ref|YP_820795.1|STER_1437|Glycosyltransferase [Streptococcus thermophilus LMD-9]_hit-name:rgpA _hit-score:666_hit-evalue:0.0_identity-percent:81.9371727748691	0	0	0	0	1	0	1	0
303	INTQRQENGEAEFANPR	T3:+79.96633	b66.a1	gi|116628243|ref|YP_820862.1|STER_1513|ligA|NAD-dependent DNA ligase [Streptococcus thermophilus LMD-9]_hit-name:ligA _hit-score:1229_hit-evalue:0.0_identity-percent:97.5308641975309	0	1	0	1	0	0	0	0
304	YVPGQHGPNNR	Y1:+79.96633 - Y1:+42.01056	b67.a1	gi|116628655|ref|YP_821274.1|STER_1973|rpsD|Ribosomal protein S4 [Streptococcus thermophilus LMD-9]_hit-name:rpsD _hit-score:401_hit-evalue:1e-114_identity-percent:100	0	0	0	1	1	0	0	0
305	FLSNIINHHSDKVSVDA	S10:+79.96633	b68.a1	gi|116627887|ref|YP_820506.1|STER_1117|ABC-type polar amino acid transport system, ATPase component [Streptococcus thermophilus LMD-9]_hit-name:gnlQ _hit-score:266_hit-evalue:2e-73_identity-percent:54.9586776859504	0	0	0	1	0	0	0	0
306	SKPLLTDDVIEQAK	T6:+79.96633	b69.a1	gi|116627450|ref|YP_820069.1|STER_0605|hypothetical protein STER_0605 [Streptococcus thermophilus LMD-9]_NOHIT	0	0	0	0	0	2	0	0
307	SGNEDCTPLAVTISNDAANNK	C6:+57.02146 - T7:+79.96633	b70.a1	gi|116628232|ref|YP_820851.1|STER_1500|neopullulanase [Streptococcus thermophilus LMD-9]_hit-name:amyL _hit-score:1028_hit-evalue:0.0_identity-percent:100	0	0	1	0	0	1	0	0
308	SNYYQEPDYEDVNQLTEEGLPVYR	T16:+79.96633	b71.a1	gi|116627533|ref|YP_820152.1|STER_0698|Transcriptional regulator [Streptococcus thermophilus LMD-9]_hit-name:epsA _hit-score:57_hit-evalue:6e-10_identity-percent:27.6018099547511	0	0	0	0	1	0	0	1
309	INVNNYNDDAIQVLEGLDAVR	Y6:+79.96633 - I1:+42.01056	b72.a1	gi|116627477|ref|YP_820096.1|STER_0633|DNA topoisomerase IV subunit B [Streptococcus thermophilus LMD-9]_hit-name:parE _hit-score:1157_hit-evalue:0.0_identity-percent:90.9090909090909	0	1	0	0	0	0	1	0
310	PYDGDESFLAGPTERSLK	S16:+79.96633 - P1:+42.01056	b74.a1	gi|116628346|ref|YP_820965.1|STER_1622|Pyruvate-formate lyase [Streptococcus thermophilus LMD-9]_hit-name:pfl _hit-score:1562_hit-evalue:0.0_identity-percent:100	0	0	0	0	0	0	1	0
311	ADGVNYIK	Y6:+79.96633	b75.a1	gi|116627675|ref|YP_820294.1|STER_0859|Uncharacterized ABC-type transport system, permease component [Streptococcus thermophilus LMD-9]_hit-name:livH _hit-score:45_hit-evalue:2e-06_identity-percent:26.8181818181818	0	0	0	0	1	0	0	0
312	VITPAPSTETAETVK	T8:+79.96633	b76.a1	gi|116627136|ref|YP_819755.1|STER_0243|Preprotein translocase subunit YajC [Streptococcus thermophilus LMD-9]_hit-name:yajC _hit-score:185_hit-evalue:2e-49_identity-percent:89.2857142857143	0	0	0	0	0	1	0	0
313	NEIASESYDEATDKYTSTTALQK	Y8:+79.96633	b77.a1	gi|116628571|ref|YP_821190.1|STER_1880|rplQ|Ribosomal protein L17 [Streptococcus thermophilus LMD-9]_hit-name:rplQ _hit-score:246_hit-evalue:7e-68_identity-percent:100	0	0	0	0	0	0	0	1
314	LRQTISQIMPSLHQGK	S6:+79.96633	b78.a1	gi|116627964|ref|YP_820583.1|STER_1197|cell division membrane protein [Streptococcus thermophilus LMD-9]_hit-name:rodA _hit-score:777_hit-evalue:0.0_identity-percent:86.1052631578947	0	0	0	0	0	1	0	0
315	MSTYAIIK	M1:+15.99491 - S2:+79.96633	b79.a1	gi|116627316|ref|YP_819935.1|STER_0455|rplU|Ribosomal protein L21 [Streptococcus thermophilus LMD-9]_hit-name:rplU _hit-score:172_hit-evalue:1e-45_identity-percent:86.5384615384615	0	0	0	0	1	0	0	0
316	LINTDNVASGVNVEVGKK	S9:+79.96633	b80.a1	gi|116628646|ref|YP_821265.1|STER_1962|hypothetical protein STER_1962 [Streptococcus thermophilus LMD-9]_hit-name:grpE _hit-score:24_hit-evalue:1.4_identity-percent:36.3636363636364	0	0	0	0	1	0	0	0
317	VLTPEEESGQISLSGK	S8:+79.96633	b81.a1	gi|116627233|ref|YP_819852.1|STER_0353|Predicted metal-binding, possibly nucleic acid-binding protein [Streptococcus thermophilus LMD-9]_hit-name:alaS _hit-score:26_hit-evalue:0.45_identity-percent:38.8888888888889	0	0	0	0	0	1	0	0
318	DLSQDQVQAVFDR	S3:+79.96633	b82.a1	gi|116628281|ref|YP_820900.1|STER_1552|trpD|Anthranilate phosphoribosyltransferase [Streptococcus thermophilus LMD-9]_hit-name:trpD _hit-score:640_hit-evalue:0.0_identity-percent:99.4011976047904	0	0	0	0	0	0	0	1
319	AWVRSFGVKATISNCSNNYGPYQHIEK	C15:+57.02146 - S5:+79.96633	b83.a1	gi|116627988|ref|YP_820607.1|STER_1222|dTDP-D-glucose 4,6-dehydratase [Streptococcus thermophilus LMD-9]_hit-name:rmlB _hit-score:720_hit-evalue:0.0_identity-percent:100	0	1	0	0	0	0	0	0
320	ATIGTVGNEQQSLINLGK	S12:+79.96633	b85.a1	gi|116628595|ref|YP_821214.1|STER_1904|rplB|Ribosomal protein L2 [Streptococcus thermophilus LMD-9]_hit-name:rplB _hit-score:557_hit-evalue:1e-161_identity-percent:100	0	0	0	0	0	0	0	1
321	SIGKGQDWTLTAEVVTKPEVK	S1:+79.96633	b86.a1	gi|116627090|ref|YP_819709.1|STER_0191|tig|FKBP-type peptidyl-prolyl cis-trans isomerase (trigger factor) [Streptococcus thermophilus LMD-9]_hit-name:tig _hit-score:737_hit-evalue:0.0_identity-percent:90.632318501171	0	0	0	0	1	0	0	0
322	DVLSVGQDVTVK	S4:+79.96633	b87.a1	gi|116627481|ref|YP_820100.1|STER_0639|rpsA|Ribosomal protein S1 [Streptococcus thermophilus LMD-9]_hit-name:rpsA _hit-score:694_hit-evalue:0.0_identity-percent:92	0	0	0	0	0	0	0	1
323	LVIGPCSSDNEKAVLDYAHR	C6:+57.02146 - S7:+79.96633 - S8:+79.96633	b88.a1	gi|116628423|ref|YP_821042.1|STER_1703|3-deoxy-D-arabino-heptulosonate 7-phosphate (DAHP) synthase [Streptococcus thermophilus LMD-9]_hit-name:aroG1 _hit-score:687_hit-evalue:0.0_identity-percent:99.7084548104956	0	0	0	1	0	0	0	0
324	GISEVVFDR	S3:+79.96633	b89.a1	gi|116628582|ref|YP_821201.1|STER_1891|rplR|Ribosomal protein L18 [Streptococcus thermophilus LMD-9]_hit-name:rplR _hit-score:227_hit-evalue:4e-62_identity-percent:98.3050847457627	0	0	1	0	0	0	0	0
325	TLNSAIANAENNFGLEK	S4:+79.96633	b90.a1	gi|116628593|ref|YP_821212.1|STER_1902|rplV|Ribosomal protein L22 [Streptococcus thermophilus LMD-9]_hit-name:rplV _hit-score:218_hit-evalue:3e-59_identity-percent:100	0	0	0	0	0	0	0	1
326	FNYSSVMAVPK	Y3:+79.96633	b91.a1	gi|116628586|ref|YP_821205.1|STER_1895|rplE|Ribosomal protein L5 [Streptococcus thermophilus LMD-9]_hit-name:rplE _hit-score:320_hit-evalue:9e-90_identity-percent:91.6666666666667	1	0	0	0	0	0	0	0
327	ALAAGGNAVMLGSMFAGTDEAPGETEIFQGR	S13:+79.96633 - T18:+79.96633	b92.a1	gi|116628674|ref|YP_821293.1|STER_1992|IMP dehydrogenase/GMP reductase [Streptococcus thermophilus LMD-9]_hit-name:guaB _hit-score:923_hit-evalue:0.0_identity-percent:96.551724137931	0	0	0	0	0	1	0	0
328	EAGIIDLPSTLR	S9:+79.96633	b94.a1	gi|116628468|ref|YP_821087.1|STER_1751|Glutamine synthetase [Streptococcus thermophilus LMD-9]_hit-name:tnp1239 _hit-score:_hit-evalue:9.6_identity-percent:35.1351351351351	0	1	0	0	0	0	0	0
329	VQIDTPEEYQGSIIQALSER	S18:+79.96633	b95.a1	gi|116627599|ref|YP_820218.1|STER_0771|Predicted membrane GTPase involved in stress response [Streptococcus thermophilus LMD-9]_hit-name:typA _hit-score:1145_hit-evalue:0.0_identity-percent:95.7723577235772	0	0	0	0	1	0	0	0
330	VISIGGDGMLLSAFHMYEKELARVRFVGIHTGHLGF	M9:+15.99491 - S12:+79.96633 - Y17:+79.96633 - V1:+42.01056	b96.a1	gi|116628161|ref|YP_820780.1|STER_1422|ppnK|NAD kinase [Streptococcus thermophilus LMD-9]_hit-name:ppnK _hit-score:521_hit-evalue:1e-150_identity-percent:97.7611940298508	0	1	0	0	0	0	0	0
331	KNLTLLGSKETPYIFEYSPQVLESFDNR	S8:+79.96633 - T11:+79.96633	b97.a1	gi|116627686|ref|YP_820305.1|STER_0872|Enzyme related to GTP cyclohydrolase I [Streptococcus thermophilus LMD-9]_hit-name:punA _hit-score:24_hit-evalue:1.5_identity-percent:29.7872340425532	0	0	0	0	0	0	0	1
332	NQTSSVTTSPVAPTVEVVASSPQVPVAPVAAPAAV	S20:+79.96633 - S21:+79.96633 - T14:+79.96633	b99.a1	gi|116627300|ref|YP_819919.1|STER_0435|Biotin carboxyl carrier protein [Streptococcus thermophilus LMD-9]_hit-name:accB _hit-score:211_hit-evalue:4e-57_identity-percent:72.8395061728395	0	0	0	0	0	0	0	1
333	DTAYQVIERIAYSYANGDAMLPSIDR	M20:+15.99491 - S13:+79.96633	c100.a1	gi|116627957|ref|YP_820576.1|STER_1190|Adenine/guanine|reversed phosphoribosyltransferase or related PRPP-binding protein [Streptococcus thermophilus LMD-9]_hit-name:apt _hit-score:346_hit-evalue:1e-97_identity-percent:100	0	1	0	0	0	0	0	0
334	SHQDEVEAPEGITFEVPSATSIVVSGINK	T20:+79.96633	c101.a1	gi|116628583|ref|YP_821202.1|STER_1892|rplF|Ribosomal protein L6P/L9E [Streptococcus thermophilus LMD-9]_hit-name:rplF _hit-score:353_hit-evalue:1e-99_identity-percent:100	0	0	0	0	1	0	0	0
335	VISTLTTGATLQEFLVPTETGALK	T7:+79.96633	c102.a1	gi|116628118|ref|YP_820737.1|STER_1368|aldose 1-epimerase [Streptococcus thermophilus LMD-9]_hit-name:galM _hit-score:707_hit-evalue:0.0_identity-percent:100	0	0	0	0	0	0	1	0
336	TKNFGGLTAVGDVSMELNEGELVGLIGPNGAGK	T1:+79.96633 - T1:+42.01056	c103.a1	gi|116627277|ref|YP_819896.1|STER_0401|ABC-type branched-chain amino acid transport system, ATPase component [Streptococcus thermophilus LMD-9]_hit-name:livG _hit-score:488_hit-evalue:1e-140_identity-percent:99.2125984251969	0	1	0	0	0	0	0	0
337	AVTCSDSSGFVYDPDGIDVDLLK	C4:+57.02146 - S8:+79.96633	c104.a1	gi|116627327|ref|YP_819946.1|STER_0467|Glutamate dehydrogenase/leucine dehydrogenase [Streptococcus thermophilus LMD-9]_hit-name:gdhA _hit-score:893_hit-evalue:0.0_identity-percent:100	0	0	0	0	1	0	0	0
338	MNIYDQLQAVEDRYEELGELLSDPEVVSDTK	Y14:+79.96633	c105.a1	gi|116627620|ref|YP_820239.1|STER_0793|prfA|Protein chain release factor A [Streptococcus thermophilus LMD-9]_hit-name:prfA _hit-score:653_hit-evalue:0.0_identity-percent:94.4289693593315	0	1	0	0	0	0	0	0
339	VQTIDPLFVAVADLSESVSDLNTR	S15:+79.96633	c106.a1	gi|116627554|ref|YP_820173.1|STER_0721|Uncharacterized protein containing a divergent version of the methyl-accepting chemotaxis-like domain [Streptococcus thermophilus LMD-9]_hit-name:pepB _hit-score:22_hit-evalue:4.0_identity-percent:28.5714285714286	0	0	0	0	1	0	0	0

## Sheet: compare.phosphopeptides.by.genotype
	Supporting information Table S3. Spectral counting of phosphopeptides present per genotype (WT/mutant)
	Filter list proteins: proteins filtered from original list of X!TandemPipeline. Here we conserved only phosphopeptides with a maximum peptide Evalue = O.001
	338 phosphopeptides
Informations Table
Num pep	number of the peptide
sequence	phosphopeptide sequence
liste.modifs	localization of phosphosite
Sub-group ID	name of the sub group
Top phosphoisland protein	name of the protein phosphorylated
numpep	sequence	liste.modifs	position.in.peptide	position.in.protein	Sub-group ID	Top PhosphoIsland protein	Mut	WT
1	YGSYGSYGSYGEYGKK	Y7:+79.96633	7	221	a1.a1	gi|116627844|ref|YP_820463.1|STER_1068|Tyrosine-protein kinase (capsular polysaccharide biosynthesis) [Streptococcus thermophilus LMD-9]_hit-name:epsD _hit-score:422_hit-evalue:1e-120_identity-percent:90.2439024390244	2	1
2	YGSYGSYGSYGEYGKK	Y13:+79.96633	13	227	a1.a1	gi|116627844|ref|YP_820463.1|STER_1068|Tyrosine-protein kinase (capsular polysaccharide biosynthesis) [Streptococcus thermophilus LMD-9]_hit-name:epsD _hit-score:422_hit-evalue:1e-120_identity-percent:90.2439024390244	16	16
3	YGSYGSYGSYGEYGKK	S9:+79.96633	9	223	a1.a1	gi|116627844|ref|YP_820463.1|STER_1068|Tyrosine-protein kinase (capsular polysaccharide biosynthesis) [Streptococcus thermophilus LMD-9]_hit-name:epsD _hit-score:422_hit-evalue:1e-120_identity-percent:90.2439024390244	2	2
4	YGSYGSYGSYGEYGKK	Y10:+79.96633	10	224	a1.a1	gi|116627844|ref|YP_820463.1|STER_1068|Tyrosine-protein kinase (capsular polysaccharide biosynthesis) [Streptococcus thermophilus LMD-9]_hit-name:epsD _hit-score:422_hit-evalue:1e-120_identity-percent:90.2439024390244	7	10
5	YGSYGSYGSYGEYGKK	S6:+79.96633	6	220	a1.a1	gi|116627844|ref|YP_820463.1|STER_1068|Tyrosine-protein kinase (capsular polysaccharide biosynthesis) [Streptococcus thermophilus LMD-9]_hit-name:epsD _hit-score:422_hit-evalue:1e-120_identity-percent:90.2439024390244	1	0
6	YGSYGSYGSYGEYGKK	Y4:+79.96633 - Y13:+79.96633	4 and 13	218 and 227	a1.a1	gi|116627844|ref|YP_820463.1|STER_1068|Tyrosine-protein kinase (capsular polysaccharide biosynthesis) [Streptococcus thermophilus LMD-9]_hit-name:epsD _hit-score:422_hit-evalue:1e-120_identity-percent:90.2439024390244	1	1
7	YGSYGSYGSYGEYGKK	Y7:+79.96633 - Y13:+79.96633	7 and 13	221 and 227	a1.a1	gi|116627844|ref|YP_820463.1|STER_1068|Tyrosine-protein kinase (capsular polysaccharide biosynthesis) [Streptococcus thermophilus LMD-9]_hit-name:epsD _hit-score:422_hit-evalue:1e-120_identity-percent:90.2439024390244	5	4
8	YGSYGSYGSYGEYGKK	S9:+79.96633 - Y7:+79.96633	9 and 7	223 and 221	a1.a1	gi|116627844|ref|YP_820463.1|STER_1068|Tyrosine-protein kinase (capsular polysaccharide biosynthesis) [Streptococcus thermophilus LMD-9]_hit-name:epsD _hit-score:422_hit-evalue:1e-120_identity-percent:90.2439024390244	0	2
9	YGSYGSYGSYGEYGKK	S9:+79.96633 - Y13:+79.96633	9 and 13	223 and 227	a1.a1	gi|116627844|ref|YP_820463.1|STER_1068|Tyrosine-protein kinase (capsular polysaccharide biosynthesis) [Streptococcus thermophilus LMD-9]_hit-name:epsD _hit-score:422_hit-evalue:1e-120_identity-percent:90.2439024390244	1	1
10	YGSYGSYGSYGEYGKK	Y4:+79.96633 - Y10:+79.96633	4 and 10	218 and 224	a1.a1	gi|116627844|ref|YP_820463.1|STER_1068|Tyrosine-protein kinase (capsular polysaccharide biosynthesis) [Streptococcus thermophilus LMD-9]_hit-name:epsD _hit-score:422_hit-evalue:1e-120_identity-percent:90.2439024390244	0	1
11	YGSYGSYGSYGEYGKK	Y10:+79.96633 - Y13:+79.96633	10 and 13	224 and 227	a1.a1	gi|116627844|ref|YP_820463.1|STER_1068|Tyrosine-protein kinase (capsular polysaccharide biosynthesis) [Streptococcus thermophilus LMD-9]_hit-name:epsD _hit-score:422_hit-evalue:1e-120_identity-percent:90.2439024390244	0	1
12	YGSYGSYGSYGEYGK	Y13:+79.96633	13	227	a1.a1	gi|116627844|ref|YP_820463.1|STER_1068|Tyrosine-protein kinase (capsular polysaccharide biosynthesis) [Streptococcus thermophilus LMD-9]_hit-name:epsD _hit-score:422_hit-evalue:1e-120_identity-percent:90.2439024390244	9	6
13	YGSYGSYGSYGEYGK	Y10:+79.96633	10	224	a1.a1	gi|116627844|ref|YP_820463.1|STER_1068|Tyrosine-protein kinase (capsular polysaccharide biosynthesis) [Streptococcus thermophilus LMD-9]_hit-name:epsD _hit-score:422_hit-evalue:1e-120_identity-percent:90.2439024390244	8	10
14	YGSYGSYGSYGEYGK	S9:+79.96633	9	223	a1.a1	gi|116627844|ref|YP_820463.1|STER_1068|Tyrosine-protein kinase (capsular polysaccharide biosynthesis) [Streptococcus thermophilus LMD-9]_hit-name:epsD _hit-score:422_hit-evalue:1e-120_identity-percent:90.2439024390244	1	2
15	YGSYGSYGSYGEYGK	Y1:+79.96633	1	215	a1.a1	gi|116627844|ref|YP_820463.1|STER_1068|Tyrosine-protein kinase (capsular polysaccharide biosynthesis) [Streptococcus thermophilus LMD-9]_hit-name:epsD _hit-score:422_hit-evalue:1e-120_identity-percent:90.2439024390244	1	2
16	YGSYGSYGSYGEYGK	Y7:+79.96633	7	221	a1.a1	gi|116627844|ref|YP_820463.1|STER_1068|Tyrosine-protein kinase (capsular polysaccharide biosynthesis) [Streptococcus thermophilus LMD-9]_hit-name:epsD _hit-score:422_hit-evalue:1e-120_identity-percent:90.2439024390244	1	0
17	YGSYGSYGSYGEYGK	S6:+79.96633	6	220	a1.a1	gi|116627844|ref|YP_820463.1|STER_1068|Tyrosine-protein kinase (capsular polysaccharide biosynthesis) [Streptococcus thermophilus LMD-9]_hit-name:epsD _hit-score:422_hit-evalue:1e-120_identity-percent:90.2439024390244	2	0
18	YGSYGSYGSYGEYGK	Y4:+79.96633	4	218	a1.a1	gi|116627844|ref|YP_820463.1|STER_1068|Tyrosine-protein kinase (capsular polysaccharide biosynthesis) [Streptococcus thermophilus LMD-9]_hit-name:epsD _hit-score:422_hit-evalue:1e-120_identity-percent:90.2439024390244	0	2
19	VDMTVDKYGSYGSYGSYGEYGKK	S13:+79.96633	13	220	a1.a1	gi|116627844|ref|YP_820463.1|STER_1068|Tyrosine-protein kinase (capsular polysaccharide biosynthesis) [Streptococcus thermophilus LMD-9]_hit-name:epsD _hit-score:422_hit-evalue:1e-120_identity-percent:90.2439024390244	1	0
20	VDMTVDKYGSYGSYGSYGEYGKK	S16:+79.96633	16	223	a1.a1	gi|116627844|ref|YP_820463.1|STER_1068|Tyrosine-protein kinase (capsular polysaccharide biosynthesis) [Streptococcus thermophilus LMD-9]_hit-name:epsD _hit-score:422_hit-evalue:1e-120_identity-percent:90.2439024390244	3	0
21	VDMTVDKYGSYGSYGSYGEYGKK	Y20:+79.96633	20	227	a1.a1	gi|116627844|ref|YP_820463.1|STER_1068|Tyrosine-protein kinase (capsular polysaccharide biosynthesis) [Streptococcus thermophilus LMD-9]_hit-name:epsD _hit-score:422_hit-evalue:1e-120_identity-percent:90.2439024390244	4	2
22	VDMTVDKYGSYGSYGSYGEYGKK	Y14:+79.96633	14	221	a1.a1	gi|116627844|ref|YP_820463.1|STER_1068|Tyrosine-protein kinase (capsular polysaccharide biosynthesis) [Streptococcus thermophilus LMD-9]_hit-name:epsD _hit-score:422_hit-evalue:1e-120_identity-percent:90.2439024390244	0	1
23	VDMTVDKYGSYGSYGSYGEYGKK	S10:+79.96633 - Y20:+79.96633	10 and 20	215 and 227	a1.a1	gi|116627844|ref|YP_820463.1|STER_1068|Tyrosine-protein kinase (capsular polysaccharide biosynthesis) [Streptococcus thermophilus LMD-9]_hit-name:epsD _hit-score:422_hit-evalue:1e-120_identity-percent:90.2439024390244	0	1
24	VDMTVDKYGSYGSYGSYGEYGKK	Y8:+79.96633 - Y20:+79.96633	8 and 20	215 and 227	a1.a1	gi|116627844|ref|YP_820463.1|STER_1068|Tyrosine-protein kinase (capsular polysaccharide biosynthesis) [Streptococcus thermophilus LMD-9]_hit-name:epsD _hit-score:422_hit-evalue:1e-120_identity-percent:90.2439024390244	1	1
25	VDMTVDKYGSYGSYGSYGEYGKK	Y11:+79.96633 - Y17:+79.96633	11 and 17	218 and 224	a1.a1	gi|116627844|ref|YP_820463.1|STER_1068|Tyrosine-protein kinase (capsular polysaccharide biosynthesis) [Streptococcus thermophilus LMD-9]_hit-name:epsD _hit-score:422_hit-evalue:1e-120_identity-percent:90.2439024390244	0	1
26	YGSYGSYGSYGEYGK	Y4:+79.96633 - Y13:+79.96633	6 and 10	220 and 224	a1.a1	gi|116627844|ref|YP_820463.1|STER_1068|Tyrosine-protein kinase (capsular polysaccharide biosynthesis) [Streptococcus thermophilus LMD-9]_hit-name:epsD _hit-score:422_hit-evalue:1e-120_identity-percent:90.2439024390244	2	2
27	YGSYGSYGSYGEYGK	S6:+79.96633 - Y10:+79.96633	7 and 10	221 and 224	a1.a1	gi|116627844|ref|YP_820463.1|STER_1068|Tyrosine-protein kinase (capsular polysaccharide biosynthesis) [Streptococcus thermophilus LMD-9]_hit-name:epsD _hit-score:422_hit-evalue:1e-120_identity-percent:90.2439024390244	1	3
28	YGSYGSYGSYGEYGK	Y7:+79.96633 - Y10:+79.96633	6 and 13	220 and 227	a1.a1	gi|116627844|ref|YP_820463.1|STER_1068|Tyrosine-protein kinase (capsular polysaccharide biosynthesis) [Streptococcus thermophilus LMD-9]_hit-name:epsD _hit-score:422_hit-evalue:1e-120_identity-percent:90.2439024390244	1	2
29	YGSYGSYGSYGEYGK	S6:+79.96633 - Y13:+79.96633	4 and 13	218 and 227	a1.a1	gi|116627844|ref|YP_820463.1|STER_1068|Tyrosine-protein kinase (capsular polysaccharide biosynthesis) [Streptococcus thermophilus LMD-9]_hit-name:epsD _hit-score:422_hit-evalue:1e-120_identity-percent:90.2439024390244	1	0
30	YGSYGSYGSYGEYGK	Y7:+79.96633 - Y13:+79.96633	7 and 13	221 and 227	a1.a1	gi|116627844|ref|YP_820463.1|STER_1068|Tyrosine-protein kinase (capsular polysaccharide biosynthesis) [Streptococcus thermophilus LMD-9]_hit-name:epsD _hit-score:422_hit-evalue:1e-120_identity-percent:90.2439024390244	1	1
31	VDMTVDKYGSYGSYGSYGEYGKK	Y8:+79.96633 - Y11:+79.96633 - Y20:+79.96633	8 and 11 and 20	215 and 218 and 227	a1.a1	gi|116627844|ref|YP_820463.1|STER_1068|Tyrosine-protein kinase (capsular polysaccharide biosynthesis) [Streptococcus thermophilus LMD-9]_hit-name:epsD _hit-score:422_hit-evalue:1e-120_identity-percent:90.2439024390244	1	0
32	VDMTVDKYGSYGSYGSYGEYGKK	S13:+79.96633 - Y17:+79.96633 - Y20:+79.96633	13 and 17 and 20	220 and 224 and 227	a1.a1	gi|116627844|ref|YP_820463.1|STER_1068|Tyrosine-protein kinase (capsular polysaccharide biosynthesis) [Streptococcus thermophilus LMD-9]_hit-name:epsD _hit-score:422_hit-evalue:1e-120_identity-percent:90.2439024390244	1	0
33	VDMTVDKYGSYGSYGSYGEYGKK	S10:+79.96633 - Y11:+79.96633 - Y20:+79.96633	10 and 11 and 20	217 and 218 and 227	a1.a1	gi|116627844|ref|YP_820463.1|STER_1068|Tyrosine-protein kinase (capsular polysaccharide biosynthesis) [Streptococcus thermophilus LMD-9]_hit-name:epsD _hit-score:422_hit-evalue:1e-120_identity-percent:90.2439024390244	1	0
34	VDMTVDKYGSYGSYGSYGEYGKK	T4:+79.96633 - Y14:+79.96633 - Y20:+79.96633	4 and 14 and 20	211 and 221 and 227	a1.a1	gi|116627844|ref|YP_820463.1|STER_1068|Tyrosine-protein kinase (capsular polysaccharide biosynthesis) [Streptococcus thermophilus LMD-9]_hit-name:epsD _hit-score:422_hit-evalue:1e-120_identity-percent:90.2439024390244	1	0
35	VDMTVDKYGSYGSYGSYGEYGKK	S16:+79.96633 - Y14:+79.96633 - Y20:+79.96633	16 and 14 and 20	223 and 221 and 227	a1.a1	gi|116627844|ref|YP_820463.1|STER_1068|Tyrosine-protein kinase (capsular polysaccharide biosynthesis) [Streptococcus thermophilus LMD-9]_hit-name:epsD _hit-score:422_hit-evalue:1e-120_identity-percent:90.2439024390244	0	1
36	VDMTVDKYGSYGSYGSYGEYGKK	S10:+79.96633 - Y8:+79.96633 - Y20:+79.96633	10 and 8 and 20	217 and 215 and 227	a1.a1	gi|116627844|ref|YP_820463.1|STER_1068|Tyrosine-protein kinase (capsular polysaccharide biosynthesis) [Streptococcus thermophilus LMD-9]_hit-name:epsD _hit-score:422_hit-evalue:1e-120_identity-percent:90.2439024390244	0	1
37	VDMTVDKYGSYGSYGSYGEYGK	Y14:+79.96633	14	221	a1.a1	gi|116627844|ref|YP_820463.1|STER_1068|Tyrosine-protein kinase (capsular polysaccharide biosynthesis) [Streptococcus thermophilus LMD-9]_hit-name:epsD _hit-score:422_hit-evalue:1e-120_identity-percent:90.2439024390244	2	1
38	VDMTVDKYGSYGSYGSYGEYGK	S16:+79.96633	16	223	a1.a1	gi|116627844|ref|YP_820463.1|STER_1068|Tyrosine-protein kinase (capsular polysaccharide biosynthesis) [Streptococcus thermophilus LMD-9]_hit-name:epsD _hit-score:422_hit-evalue:1e-120_identity-percent:90.2439024390244	3	2
39	VDMTVDKYGSYGSYGSYGEYGK	S10:+79.96633	10	217	a1.a1	gi|116627844|ref|YP_820463.1|STER_1068|Tyrosine-protein kinase (capsular polysaccharide biosynthesis) [Streptococcus thermophilus LMD-9]_hit-name:epsD _hit-score:422_hit-evalue:1e-120_identity-percent:90.2439024390244	0	1
40	VDMTVDKYGSYGSYGSYGEYGK	Y20:+79.96633	20	227	a1.a1	gi|116627844|ref|YP_820463.1|STER_1068|Tyrosine-protein kinase (capsular polysaccharide biosynthesis) [Streptococcus thermophilus LMD-9]_hit-name:epsD _hit-score:422_hit-evalue:1e-120_identity-percent:90.2439024390244	1	0
41	VDMTVDKYGSYGSYGSYGEYGK	Y17:+79.96633	17	224	a1.a1	gi|116627844|ref|YP_820463.1|STER_1068|Tyrosine-protein kinase (capsular polysaccharide biosynthesis) [Streptococcus thermophilus LMD-9]_hit-name:epsD _hit-score:422_hit-evalue:1e-120_identity-percent:90.2439024390244	0	1
42	VDMTVDKYGSYGSYGSYGEYGK	Y11:+79.96633	11	218	a1.a1	gi|116627844|ref|YP_820463.1|STER_1068|Tyrosine-protein kinase (capsular polysaccharide biosynthesis) [Streptococcus thermophilus LMD-9]_hit-name:epsD _hit-score:422_hit-evalue:1e-120_identity-percent:90.2439024390244	0	1
43	VDMTVDKYGSYGSYGSYGEYGK	S13:+79.96633 - Y8:+79.96633	13 and 8	220 and 215	a1.a1	gi|116627844|ref|YP_820463.1|STER_1068|Tyrosine-protein kinase (capsular polysaccharide biosynthesis) [Streptococcus thermophilus LMD-9]_hit-name:epsD _hit-score:422_hit-evalue:1e-120_identity-percent:90.2439024390244	1	0
44	VDMTVDKYGSYGSYGSYGEYGK	S10:+79.96633 - S16:+79.96633	10 and 16	217 and 223	a1.a1	gi|116627844|ref|YP_820463.1|STER_1068|Tyrosine-protein kinase (capsular polysaccharide biosynthesis) [Streptococcus thermophilus LMD-9]_hit-name:epsD _hit-score:422_hit-evalue:1e-120_identity-percent:90.2439024390244	1	0
45	VDMTVDKYGSYGSYGSYGEYGK	S13:+79.96633 - Y17:+79.96633	13 and 17	220 and 224	a1.a1	gi|116627844|ref|YP_820463.1|STER_1068|Tyrosine-protein kinase (capsular polysaccharide biosynthesis) [Streptococcus thermophilus LMD-9]_hit-name:epsD _hit-score:422_hit-evalue:1e-120_identity-percent:90.2439024390244	1	0
46	VDMTVDKYGSYGSYGSYGEYGKK	Y17:+79.96633	17	224	a1.a1	gi|116627844|ref|YP_820463.1|STER_1068|Tyrosine-protein kinase (capsular polysaccharide biosynthesis) [Streptococcus thermophilus LMD-9]_hit-name:epsD _hit-score:422_hit-evalue:1e-120_identity-percent:90.2439024390244	1	2
47	VDMTVDKYGSYGSYGSYGEYGKK	S10:+79.96633	10	217	a1.a1	gi|116627844|ref|YP_820463.1|STER_1068|Tyrosine-protein kinase (capsular polysaccharide biosynthesis) [Streptococcus thermophilus LMD-9]_hit-name:epsD _hit-score:422_hit-evalue:1e-120_identity-percent:90.2439024390244	0	1
48	VDMTVDKYGSYGSYGSYGEYGKK	Y8:+79.96633	8	215	a1.a1	gi|116627844|ref|YP_820463.1|STER_1068|Tyrosine-protein kinase (capsular polysaccharide biosynthesis) [Streptococcus thermophilus LMD-9]_hit-name:epsD _hit-score:422_hit-evalue:1e-120_identity-percent:90.2439024390244	1	0
49	VDMTVDKYGSYGSYGSYGEYGKK	S16:+79.96633 - Y20:+79.96633	16 and 20	223 and 227	a1.a1	gi|116627844|ref|YP_820463.1|STER_1068|Tyrosine-protein kinase (capsular polysaccharide biosynthesis) [Streptococcus thermophilus LMD-9]_hit-name:epsD _hit-score:422_hit-evalue:1e-120_identity-percent:90.2439024390244	2	1
50	VDMTVDKYGSYGSYGSYGEYGK	S16:+79.96633 - Y8:+79.96633	16 and 8	223 and 215	a1.a1	gi|116627844|ref|YP_820463.1|STER_1068|Tyrosine-protein kinase (capsular polysaccharide biosynthesis) [Streptococcus thermophilus LMD-9]_hit-name:epsD _hit-score:422_hit-evalue:1e-120_identity-percent:90.2439024390244	0	1
51	VDMTVDKYGSYGSYGSYGEYGK	T4:+79.96633 - Y14:+79.96633	4 and 14	211 and 221	a1.a1	gi|116627844|ref|YP_820463.1|STER_1068|Tyrosine-protein kinase (capsular polysaccharide biosynthesis) [Streptococcus thermophilus LMD-9]_hit-name:epsD _hit-score:422_hit-evalue:1e-120_identity-percent:90.2439024390244	1	0
52	VDMTVDKYGSYGSYGSYGEYGK	S10:+79.96633 - Y14:+79.96633	10 and 14	217 and 221	a1.a1	gi|116627844|ref|YP_820463.1|STER_1068|Tyrosine-protein kinase (capsular polysaccharide biosynthesis) [Streptococcus thermophilus LMD-9]_hit-name:epsD _hit-score:422_hit-evalue:1e-120_identity-percent:90.2439024390244	0	1
53	YGSYGSYGSYGEYGKKSDQK	S9:+79.96633 - Y13:+79.96633	9 and 13	223 and 227	a1.a1	gi|116627844|ref|YP_820463.1|STER_1068|Tyrosine-protein kinase (capsular polysaccharide biosynthesis) [Streptococcus thermophilus LMD-9]_hit-name:epsD _hit-score:422_hit-evalue:1e-120_identity-percent:90.2439024390244	0	1
54	VDMTVDKYGSYGSYGSYGEYGK	M3:+15.99491 - Y8:+79.96633 - Y20:+79.96633	8 and 20	215 and 227	a1.a1	gi|116627844|ref|YP_820463.1|STER_1068|Tyrosine-protein kinase (capsular polysaccharide biosynthesis) [Streptococcus thermophilus LMD-9]_hit-name:epsD _hit-score:422_hit-evalue:1e-120_identity-percent:90.2439024390244	1	0
55	NLNETQTFK	T5:+79.96633	5	282	a2.a1	gi|116627610|ref|YP_820229.1|STER_0782|Cell division initiation protein [Streptococcus thermophilus LMD-9]_hit-name:divIVA _hit-score:550_hit-evalue:1e-158_identity-percent:98.2817869415807	0	27
56	NLNETQTFKLNISE	T5:+79.96633	5	282	a2.a1	gi|116627610|ref|YP_820229.1|STER_0782|Cell division initiation protein [Streptococcus thermophilus LMD-9]_hit-name:divIVA _hit-score:550_hit-evalue:1e-158_identity-percent:98.2817869415807	0	23
57	VLDEHVPDSNDAASFDATR	S9:+79.96633	9	192	a2.a2	gi|116627610|ref|YP_820229.1|STER_0782|Cell division initiation protein [Streptococcus thermophilus LMD-9]_hit-name:divIVA _hit-score:550_hit-evalue:1e-158_identity-percent:98.2817869415807	0	1
58	VLDEHVPDSNDAASFDATRQFTPDEMAELQR	T18:+79.96633	18	201	a2.a2	gi|116627610|ref|YP_820229.1|STER_0782|Cell division initiation protein [Streptococcus thermophilus LMD-9]_hit-name:divIVA _hit-score:550_hit-evalue:1e-158_identity-percent:98.2817869415807	0	1
59	VLDEHVPDSNDAASFDATR	T18:+79.96633	18	201	a2.a2	gi|116627610|ref|YP_820229.1|STER_0782|Cell division initiation protein [Streptococcus thermophilus LMD-9]_hit-name:divIVA _hit-score:550_hit-evalue:1e-158_identity-percent:98.2817869415807	0	15
60	VLDEHVPDSNDAASFDATR	S14:+79.96633	14	197	a2.a2	gi|116627610|ref|YP_820229.1|STER_0782|Cell division initiation protein [Streptococcus thermophilus LMD-9]_hit-name:divIVA _hit-score:550_hit-evalue:1e-158_identity-percent:98.2817869415807	0	14
61	VLDEHVPDSNDAASFDATRQFTPDEMAELQR	M26:+15.99491 - S9:+79.96633	9	192	a2.a2	gi|116627610|ref|YP_820229.1|STER_0782|Cell division initiation protein [Streptococcus thermophilus LMD-9]_hit-name:divIVA _hit-score:550_hit-evalue:1e-158_identity-percent:98.2817869415807	0	1
62	QFTPDEMAELQR	T3:+79.96633	3	205	a2.a2	gi|116627610|ref|YP_820229.1|STER_0782|Cell division initiation protein [Streptococcus thermophilus LMD-9]_hit-name:divIVA _hit-score:550_hit-evalue:1e-158_identity-percent:98.2817869415807	0	2
63	VLDEHVPDSNDAASFDATRQFTPDEMAELQR	M26:+15.99491 - T18:+79.96633	18	201	a2.a2	gi|116627610|ref|YP_820229.1|STER_0782|Cell division initiation protein [Streptococcus thermophilus LMD-9]_hit-name:divIVA _hit-score:550_hit-evalue:1e-158_identity-percent:98.2817869415807	0	1
64	VLDEHVPDSNDAASFDATRQFTPDEMAELQR	T22:+79.96633	22	205	a2.a2	gi|116627610|ref|YP_820229.1|STER_0782|Cell division initiation protein [Streptococcus thermophilus LMD-9]_hit-name:divIVA _hit-score:550_hit-evalue:1e-158_identity-percent:98.2817869415807	0	1
65	VLDEHVPDSNDAASFDATRQFTPDEMAELQR	S9:+79.96633	9	192	a2.a2	gi|116627610|ref|YP_820229.1|STER_0782|Cell division initiation protein [Streptococcus thermophilus LMD-9]_hit-name:divIVA _hit-score:550_hit-evalue:1e-158_identity-percent:98.2817869415807	0	1
66	EDKTQNSYEESQELDFQDAK	S11:+79.96633	11	13	a3.a1	gi|116627170|ref|YP_819789.1|STER_0283|hypothetical protein STER_0283 [Streptococcus thermophilus LMD-9]_hit-name:pcsB _hit-score:34_hit-evalue:0.006_identity-percent:21.6981132075472	0	5
67	YEESQELDFQDAK	S4:+79.96633	4	13	a3.a1	gi|116627170|ref|YP_819789.1|STER_0283|hypothetical protein STER_0283 [Streptococcus thermophilus LMD-9]_hit-name:pcsB _hit-score:34_hit-evalue:0.006_identity-percent:21.6981132075472	0	2
68	DKTQNSYEESQELDFQDAK	S10:+79.96633	10	13	a3.a1	gi|116627170|ref|YP_819789.1|STER_0283|hypothetical protein STER_0283 [Streptococcus thermophilus LMD-9]_hit-name:pcsB _hit-score:34_hit-evalue:0.006_identity-percent:21.6981132075472	0	1
69	TQNSYEESQELDFQDAK	S8:+79.96633	8	13	a3.a1	gi|116627170|ref|YP_819789.1|STER_0283|hypothetical protein STER_0283 [Streptococcus thermophilus LMD-9]_hit-name:pcsB _hit-score:34_hit-evalue:0.006_identity-percent:21.6981132075472	0	17
70	QNSYEESQELDFQDAK	S3:+79.96633	3	9	a3.a1	gi|116627170|ref|YP_819789.1|STER_0283|hypothetical protein STER_0283 [Streptococcus thermophilus LMD-9]_hit-name:pcsB _hit-score:34_hit-evalue:0.006_identity-percent:21.6981132075472	0	1
71	SEDKTQNSYEESQELDFQDAK	S12:+79.96633	12	13	a3.a1	gi|116627170|ref|YP_819789.1|STER_0283|hypothetical protein STER_0283 [Streptococcus thermophilus LMD-9]_hit-name:pcsB _hit-score:34_hit-evalue:0.006_identity-percent:21.6981132075472	0	3
72	KTQNSYEESQELDFQDAK	S9:+79.96633	9	13	a3.a1	gi|116627170|ref|YP_819789.1|STER_0283|hypothetical protein STER_0283 [Streptococcus thermophilus LMD-9]_hit-name:pcsB _hit-score:34_hit-evalue:0.006_identity-percent:21.6981132075472	0	8
73	EESQELDFQDAK	S3:+79.96633	3	13	a3.a1	gi|116627170|ref|YP_819789.1|STER_0283|hypothetical protein STER_0283 [Streptococcus thermophilus LMD-9]_hit-name:pcsB _hit-score:34_hit-evalue:0.006_identity-percent:21.6981132075472	0	2
74	KIEADGDTSPLDAFIQK	T8:+79.96633	8	73	a3.a2	gi|116627170|ref|YP_819789.1|STER_0283|hypothetical protein STER_0283 [Streptococcus thermophilus LMD-9]_hit-name:pcsB _hit-score:34_hit-evalue:0.006_identity-percent:21.6981132075472	0	10
75	KIEADGDTSPLDAFIQK	S9:+79.96633	9	74	a3.a2	gi|116627170|ref|YP_819789.1|STER_0283|hypothetical protein STER_0283 [Streptococcus thermophilus LMD-9]_hit-name:pcsB _hit-score:34_hit-evalue:0.006_identity-percent:21.6981132075472	0	15
76	IEADGDTSPLDAFIQK	T7:+79.96633	7	73	a3.a2	gi|116627170|ref|YP_819789.1|STER_0283|hypothetical protein STER_0283 [Streptococcus thermophilus LMD-9]_hit-name:pcsB _hit-score:34_hit-evalue:0.006_identity-percent:21.6981132075472	0	3
77	IEADGDTSPLDAFIQK	S8:+79.96633	8	74	a3.a2	gi|116627170|ref|YP_819789.1|STER_0283|hypothetical protein STER_0283 [Streptococcus thermophilus LMD-9]_hit-name:pcsB _hit-score:34_hit-evalue:0.006_identity-percent:21.6981132075472	0	1
78	EAEINAGVTETDSILDK	T11:+79.96633	11	43	a3.a3	gi|116627170|ref|YP_819789.1|STER_0283|hypothetical protein STER_0283 [Streptococcus thermophilus LMD-9]_hit-name:pcsB _hit-score:34_hit-evalue:0.006_identity-percent:21.6981132075472	0	1
79	EAEINAGVTETDSILDK	T9:+79.96633	9	41	a3.a3	gi|116627170|ref|YP_819789.1|STER_0283|hypothetical protein STER_0283 [Streptococcus thermophilus LMD-9]_hit-name:pcsB _hit-score:34_hit-evalue:0.006_identity-percent:21.6981132075472	0	3
80	QRQEFADSGLIGQTLANESTNSTTADETVTPITSGFGTTETK	S19:+79.96633	19	101	a3.a4	gi|116627170|ref|YP_819789.1|STER_0283|hypothetical protein STER_0283 [Streptococcus thermophilus LMD-9]_hit-name:pcsB _hit-score:34_hit-evalue:0.006_identity-percent:21.6981132075472	0	1
81	QRQEFADSGLIGQTLANESTNSTTADETVTPITSGFGTTETK	S22:+79.96633	22	104	a3.a4	gi|116627170|ref|YP_819789.1|STER_0283|hypothetical protein STER_0283 [Streptococcus thermophilus LMD-9]_hit-name:pcsB _hit-score:34_hit-evalue:0.006_identity-percent:21.6981132075472	0	1
82	QRQEFADSGLIGQTLANESTNSTTADETVTPITSGFGTTETK	T33:+79.96633	33	115	a3.a4	gi|116627170|ref|YP_819789.1|STER_0283|hypothetical protein STER_0283 [Streptococcus thermophilus LMD-9]_hit-name:pcsB _hit-score:34_hit-evalue:0.006_identity-percent:21.6981132075472	0	1
83	QRQEFADSGLIGQTLANESTNSTTADETVTPITSGFGTTETK	T14:+79.96633	14	96	a3.a4	gi|116627170|ref|YP_819789.1|STER_0283|hypothetical protein STER_0283 [Streptococcus thermophilus LMD-9]_hit-name:pcsB _hit-score:34_hit-evalue:0.006_identity-percent:21.6981132075472	0	1
84	QRQEFADSGLIGQTLANESTNSTTADETVTPITSGFGTTETK	S8:+79.96633	8	90	a3.a4	gi|116627170|ref|YP_819789.1|STER_0283|hypothetical protein STER_0283 [Streptococcus thermophilus LMD-9]_hit-name:pcsB _hit-score:34_hit-evalue:0.006_identity-percent:21.6981132075472	0	1
85	ASEPQASKPLLEDVEVSETIDSEAIATTVAGVTGVK	S17:+79.96633	17	222	a3.a5	gi|116627170|ref|YP_819789.1|STER_0283|hypothetical protein STER_0283 [Streptococcus thermophilus LMD-9]_hit-name:pcsB _hit-score:34_hit-evalue:0.006_identity-percent:21.6981132075472	0	1
86	APAAPATDPGMMGY	Y14:+79.96633	14	539	a4.a1	gi|116627146|ref|YP_819765.1|STER_0253|groEL|Chaperonin GroEL (HSP60 family) [Streptococcus thermophilus LMD-9]_hit-name:groEL _hit-score:962_hit-evalue:0.0_identity-percent:95.5473098330241	8	24
87	APAAPATDPGMMGY	M11:+15.99491 - M12:+15.99491 - Y14:+79.96633	14	539	a4.a1	gi|116627146|ref|YP_819765.1|STER_0253|groEL|Chaperonin GroEL (HSP60 family) [Streptococcus thermophilus LMD-9]_hit-name:groEL _hit-score:962_hit-evalue:0.0_identity-percent:95.5473098330241	2	11
88	APAAPATDPGMMGY	M12:+15.99491 - Y14:+79.96633	14	539	a4.a1	gi|116627146|ref|YP_819765.1|STER_0253|groEL|Chaperonin GroEL (HSP60 family) [Streptococcus thermophilus LMD-9]_hit-name:groEL _hit-score:962_hit-evalue:0.0_identity-percent:95.5473098330241	2	9
89	APAAPATDPGMMGY	M11:+15.99491 - Y14:+79.96633	14	539	a4.a1	gi|116627146|ref|YP_819765.1|STER_0253|groEL|Chaperonin GroEL (HSP60 family) [Streptococcus thermophilus LMD-9]_hit-name:groEL _hit-score:962_hit-evalue:0.0_identity-percent:95.5473098330241	0	7
90	APAAPATDPGMMGY	T7:+79.96633	7	532	a4.a1	gi|116627146|ref|YP_819765.1|STER_0253|groEL|Chaperonin GroEL (HSP60 family) [Streptococcus thermophilus LMD-9]_hit-name:groEL _hit-score:962_hit-evalue:0.0_identity-percent:95.5473098330241	0	1
91	SQLETTTSEFDREK	T6:+79.96633	6	354	a4.a2	gi|116627146|ref|YP_819765.1|STER_0253|groEL|Chaperonin GroEL (HSP60 family) [Streptococcus thermophilus LMD-9]_hit-name:groEL _hit-score:962_hit-evalue:0.0_identity-percent:95.5473098330241	1	2
92	SQLETTTSEFDREK	S1:+79.96633	1	349	a4.a2	gi|116627146|ref|YP_819765.1|STER_0253|groEL|Chaperonin GroEL (HSP60 family) [Streptococcus thermophilus LMD-9]_hit-name:groEL _hit-score:962_hit-evalue:0.0_identity-percent:95.5473098330241	0	2
93	VNLIKSQLETTTSEFDREK	S6:+79.96633	6	349	a4.a2	gi|116627146|ref|YP_819765.1|STER_0253|groEL|Chaperonin GroEL (HSP60 family) [Streptococcus thermophilus LMD-9]_hit-name:groEL _hit-score:962_hit-evalue:0.0_identity-percent:95.5473098330241	0	1
94	TSRPLLIIADDVAGEALPTLVLNK	T1:+79.96633	1	241	a4.a3	gi|116627146|ref|YP_819765.1|STER_0253|groEL|Chaperonin GroEL (HSP60 family) [Streptococcus thermophilus LMD-9]_hit-name:groEL _hit-score:962_hit-evalue:0.0_identity-percent:95.5473098330241	2	2
95	TSRPLLIIADDVAGEALPTLVLNK	S2:+79.96633	2	242	a4.a3	gi|116627146|ref|YP_819765.1|STER_0253|groEL|Chaperonin GroEL (HSP60 family) [Streptococcus thermophilus LMD-9]_hit-name:groEL _hit-score:962_hit-evalue:0.0_identity-percent:95.5473098330241	1	2
96	TNDIAGDGTTTATVLTQAIVR	T9:+79.96633	9	88	a4.a4	gi|116627146|ref|YP_819765.1|STER_0253|groEL|Chaperonin GroEL (HSP60 family) [Streptococcus thermophilus LMD-9]_hit-name:groEL _hit-score:962_hit-evalue:0.0_identity-percent:95.5473098330241	2	0
97	TNDIAGDGTTTATVLTQAIVR	T11:+79.96633	11	90	a4.a4	gi|116627146|ref|YP_819765.1|STER_0253|groEL|Chaperonin GroEL (HSP60 family) [Streptococcus thermophilus LMD-9]_hit-name:groEL _hit-score:962_hit-evalue:0.0_identity-percent:95.5473098330241	0	1
98	DATMESLGQASK	S11:+79.96633	11	319	a4.a5	gi|116627146|ref|YP_819765.1|STER_0253|groEL|Chaperonin GroEL (HSP60 family) [Streptococcus thermophilus LMD-9]_hit-name:groEL _hit-score:962_hit-evalue:0.0_identity-percent:95.5473098330241	0	1
99	DATMESLGQASK	S6:+79.96633	6	314	a4.a5	gi|116627146|ref|YP_819765.1|STER_0253|groEL|Chaperonin GroEL (HSP60 family) [Streptococcus thermophilus LMD-9]_hit-name:groEL _hit-score:962_hit-evalue:0.0_identity-percent:95.5473098330241	0	1
100	IRGTFNVVAVK	T4:+79.96633	4	268	a4.a6	gi|116627146|ref|YP_819765.1|STER_0253|groEL|Chaperonin GroEL (HSP60 family) [Streptococcus thermophilus LMD-9]_hit-name:groEL _hit-score:962_hit-evalue:0.0_identity-percent:95.5473098330241	0	2
101	LSGGVAVIK	S2:+79.96633	2	371	a4.a7	gi|116627146|ref|YP_819765.1|STER_0253|groEL|Chaperonin GroEL (HSP60 family) [Streptococcus thermophilus LMD-9]_hit-name:groEL _hit-score:962_hit-evalue:0.0_identity-percent:95.5473098330241	2	0
102	EAIAQVAAVSSR	S10:+79.96633	10	150	a4.a8	gi|116627146|ref|YP_819765.1|STER_0253|groEL|Chaperonin GroEL (HSP60 family) [Streptococcus thermophilus LMD-9]_hit-name:groEL _hit-score:962_hit-evalue:0.0_identity-percent:95.5473098330241	0	1
103	VGNDGVITIEESR	T8:+79.96633	8	174	a4.a9	gi|116627146|ref|YP_819765.1|STER_0253|groEL|Chaperonin GroEL (HSP60 family) [Streptococcus thermophilus LMD-9]_hit-name:groEL _hit-score:962_hit-evalue:0.0_identity-percent:95.5473098330241	0	1
104	VTVDKDSTVIVEGAGSAEAIANR	S7:+79.96633 - T2:+79.96633	7 and 2	327 and 322	a4.b10	gi|116627146|ref|YP_819765.1|STER_0253|groEL|Chaperonin GroEL (HSP60 family) [Streptococcus thermophilus LMD-9]_hit-name:groEL _hit-score:962_hit-evalue:0.0_identity-percent:95.5473098330241	0	1
105	QIAYNAGYEGSVIIDK	S11:+79.96633	11	460	a4.b11	gi|116627146|ref|YP_819765.1|STER_0253|groEL|Chaperonin GroEL (HSP60 family) [Streptococcus thermophilus LMD-9]_hit-name:groEL _hit-score:962_hit-evalue:0.0_identity-percent:95.5473098330241	0	1
106	SALQNAASVASLILTTEAVVADKPEQK	S8:+79.96633	8	506	a4.b12	gi|116627146|ref|YP_819765.1|STER_0253|groEL|Chaperonin GroEL (HSP60 family) [Streptococcus thermophilus LMD-9]_hit-name:groEL _hit-score:962_hit-evalue:0.0_identity-percent:95.5473098330241	0	1
107	YASLDDSVIPDAENLK	S7:+79.96633	7	144	a5.a1	gi|116627940|ref|YP_820559.1|STER_1172|Phosphoglycerate mutase 1 [Streptococcus thermophilus LMD-9]_hit-name:gpmA _hit-score:469_hit-evalue:1e-134_identity-percent:100	16	19
108	YASLDDSVIPDAENLK	S3:+79.96633	3	140	a5.a1	gi|116627940|ref|YP_820559.1|STER_1172|Phosphoglycerate mutase 1 [Streptococcus thermophilus LMD-9]_hit-name:gpmA _hit-score:469_hit-evalue:1e-134_identity-percent:100	0	5
109	YASLDDSVIPDAENLK	Y1:+79.96633	1	138	a5.a1	gi|116627940|ref|YP_820559.1|STER_1172|Phosphoglycerate mutase 1 [Streptococcus thermophilus LMD-9]_hit-name:gpmA _hit-score:469_hit-evalue:1e-134_identity-percent:100	1	0
110	YASLDDSVIPDAENLKVTLER	S7:+79.96633	7	144	a5.a1	gi|116627940|ref|YP_820559.1|STER_1172|Phosphoglycerate mutase 1 [Streptococcus thermophilus LMD-9]_hit-name:gpmA _hit-score:469_hit-evalue:1e-134_identity-percent:100	3	1
111	HYGGLTGK	Y2:+79.96633	2	90	a5.a2	gi|116627940|ref|YP_820559.1|STER_1172|Phosphoglycerate mutase 1 [Streptococcus thermophilus LMD-9]_hit-name:gpmA _hit-score:469_hit-evalue:1e-134_identity-percent:100	0	1
112	TIVFNTNHDILDGTETVISGASCTTNCLAPMAK	C23:+57.02146 - C27:+57.02146 - M31:+15.99491 - S19:+79.96633 - S22:+79.96633	19 and 22	148 and 151	a6.a1	gi|116628477|ref|YP_821096.1|STER_1761|Glyceraldehyde-3-phosphate dehydrogenase [Streptococcus thermophilus LMD-9]_hit-name:gapA1 _hit-score:633_hit-evalue:0.0_identity-percent:94.6428571428571	0	1
113	TIVFNTNHDILDGTETVISGASCTTNCLAPMAK	C23:+57.02146 - C27:+57.02146 - M31:+15.99491 - T24:+79.96633 - T25:+79.96633	24 and 25	153 and 154	a6.a1	gi|116628477|ref|YP_821096.1|STER_1761|Glyceraldehyde-3-phosphate dehydrogenase [Streptococcus thermophilus LMD-9]_hit-name:gapA1 _hit-score:633_hit-evalue:0.0_identity-percent:94.6428571428571	1	2
114	TIVFNTNHDILDGTETVISGASCTTNCLAPMAK	C23:+57.02146 - C27:+57.02146 - T14:+79.96633 - T16:+79.96633	14 and 16	143 and 145	a6.a1	gi|116628477|ref|YP_821096.1|STER_1761|Glyceraldehyde-3-phosphate dehydrogenase [Streptococcus thermophilus LMD-9]_hit-name:gapA1 _hit-score:633_hit-evalue:0.0_identity-percent:94.6428571428571	1	1
115	TIVFNTNHDILDGTETVISGASCTTNCLAPMAK	C23:+57.02146 - C27:+57.02146 - T14:+79.96633 - T24:+79.96633	14 and 24	143 and 153	a6.a1	gi|116628477|ref|YP_821096.1|STER_1761|Glyceraldehyde-3-phosphate dehydrogenase [Streptococcus thermophilus LMD-9]_hit-name:gapA1 _hit-score:633_hit-evalue:0.0_identity-percent:94.6428571428571	0	1
116	TIVFNTNHDILDGTETVISGASCTTNCLAPMAK	C23:+57.02146 - C27:+57.02146 - M31:+15.99491 - S22:+79.96633	22	151	a6.a1	gi|116628477|ref|YP_821096.1|STER_1761|Glyceraldehyde-3-phosphate dehydrogenase [Streptococcus thermophilus LMD-9]_hit-name:gapA1 _hit-score:633_hit-evalue:0.0_identity-percent:94.6428571428571	1	0
117	TIVFNTNHDILDGTETVISGASCTTNCLAPMAK	C23:+57.02146 - C27:+57.02146 - M31:+15.99491 - T25:+79.96633	25	154	a6.a1	gi|116628477|ref|YP_821096.1|STER_1761|Glyceraldehyde-3-phosphate dehydrogenase [Streptococcus thermophilus LMD-9]_hit-name:gapA1 _hit-score:633_hit-evalue:0.0_identity-percent:94.6428571428571	1	0
118	TIVFNTNHDILDGTETVISGASCTTNCLAPMAK	C23:+57.02146 - C27:+57.02146 - M31:+15.99491 - S19:+79.96633	19	148	a6.a1	gi|116628477|ref|YP_821096.1|STER_1761|Glyceraldehyde-3-phosphate dehydrogenase [Streptococcus thermophilus LMD-9]_hit-name:gapA1 _hit-score:633_hit-evalue:0.0_identity-percent:94.6428571428571	0	1
119	TIVFNTNHDILDGTETVISGASCTTNCLAPMAK	C23:+57.02146 - C27:+57.02146 - T24:+79.96633	24	153	a6.a1	gi|116628477|ref|YP_821096.1|STER_1761|Glyceraldehyde-3-phosphate dehydrogenase [Streptococcus thermophilus LMD-9]_hit-name:gapA1 _hit-score:633_hit-evalue:0.0_identity-percent:94.6428571428571	1	0
120	TIVFNTNHDILDGTETVISGASCTTNCLAPMAK	C23:+57.02146 - C27:+57.02146 - M31:+15.99491 - T16:+79.96633 - T25:+79.96633	16 and 25	145 and 154	a6.a1	gi|116628477|ref|YP_821096.1|STER_1761|Glyceraldehyde-3-phosphate dehydrogenase [Streptococcus thermophilus LMD-9]_hit-name:gapA1 _hit-score:633_hit-evalue:0.0_identity-percent:94.6428571428571	1	0
121	TIVFNTNHDILDGTETVISGASCTTNCLAPMAK	C23:+57.02146 - C27:+57.02146 - M31:+15.99491 - S19:+79.96633 - T24:+79.96633	19 and 24	148 and 153	a6.a1	gi|116628477|ref|YP_821096.1|STER_1761|Glyceraldehyde-3-phosphate dehydrogenase [Streptococcus thermophilus LMD-9]_hit-name:gapA1 _hit-score:633_hit-evalue:0.0_identity-percent:94.6428571428571	0	2
122	TIVFNTNHDILDGTETVISGASCTTNCLAPMAK	C23:+57.02146 - C27:+57.02146 - T24:+79.96633 - T25:+79.96633	24 and 25	153 and 154	a6.a1	gi|116628477|ref|YP_821096.1|STER_1761|Glyceraldehyde-3-phosphate dehydrogenase [Streptococcus thermophilus LMD-9]_hit-name:gapA1 _hit-score:633_hit-evalue:0.0_identity-percent:94.6428571428571	0	2
123	TIVFNTNHDILDGTETVISGASCTTNCLAPMAK	C23:+57.02146 - C27:+57.02146 - S19:+79.96633 - T25:+79.96633	19 and 25	148 and 154	a6.a1	gi|116628477|ref|YP_821096.1|STER_1761|Glyceraldehyde-3-phosphate dehydrogenase [Streptococcus thermophilus LMD-9]_hit-name:gapA1 _hit-score:633_hit-evalue:0.0_identity-percent:94.6428571428571	2	1
124	TIVFNTNHDILDGTETVISGASCTTNCLAPMAK	C23:+57.02146 - C27:+57.02146 - S22:+79.96633 - T25:+79.96633	22 and 25	151 and 154	a6.a1	gi|116628477|ref|YP_821096.1|STER_1761|Glyceraldehyde-3-phosphate dehydrogenase [Streptococcus thermophilus LMD-9]_hit-name:gapA1 _hit-score:633_hit-evalue:0.0_identity-percent:94.6428571428571	2	1
125	TIVFNTNHDILDGTETVISGASCTTNCLAPMAK	C23:+57.02146 - C27:+57.02146 - S19:+79.96633 - T24:+79.96633	19 and 24	148 and 153	a6.a1	gi|116628477|ref|YP_821096.1|STER_1761|Glyceraldehyde-3-phosphate dehydrogenase [Streptococcus thermophilus LMD-9]_hit-name:gapA1 _hit-score:633_hit-evalue:0.0_identity-percent:94.6428571428571	3	0
126	TIVFNTNHDILDGTETVISGASCTTNCLAPMAK	C23:+57.02146 - C27:+57.02146 - S19:+79.96633 - S22:+79.96633	19 and 22	148 and 151	a6.a1	gi|116628477|ref|YP_821096.1|STER_1761|Glyceraldehyde-3-phosphate dehydrogenase [Streptococcus thermophilus LMD-9]_hit-name:gapA1 _hit-score:633_hit-evalue:0.0_identity-percent:94.6428571428571	1	3
127	AGAANIVPNSTGAAK	S10:+79.96633	10	211	a6.a2	gi|116628477|ref|YP_821096.1|STER_1761|Glyceraldehyde-3-phosphate dehydrogenase [Streptococcus thermophilus LMD-9]_hit-name:gapA1 _hit-score:633_hit-evalue:0.0_identity-percent:94.6428571428571	6	8
128	AATNESYGYTEDPIVSSDIVGMSYGSLFDATQTK	S16:+79.96633	16	280	a6.a3	gi|116628477|ref|YP_821096.1|STER_1761|Glyceraldehyde-3-phosphate dehydrogenase [Streptococcus thermophilus LMD-9]_hit-name:gapA1 _hit-score:633_hit-evalue:0.0_identity-percent:94.6428571428571	0	3
129	AATNESYGYTEDPIVSSDIVGMSYGSLFDATQTK	M22:+15.99491 - Y24:+79.96633	24	288	a6.a3	gi|116628477|ref|YP_821096.1|STER_1761|Glyceraldehyde-3-phosphate dehydrogenase [Streptococcus thermophilus LMD-9]_hit-name:gapA1 _hit-score:633_hit-evalue:0.0_identity-percent:94.6428571428571	0	1
130	AATNESYGYTEDPIVSSDIVGMSYGSLFDATQTK	S6:+79.96633	6	270	a6.a3	gi|116628477|ref|YP_821096.1|STER_1761|Glyceraldehyde-3-phosphate dehydrogenase [Streptococcus thermophilus LMD-9]_hit-name:gapA1 _hit-score:633_hit-evalue:0.0_identity-percent:94.6428571428571	0	2
131	AATNESYGYTEDPIVSSDIVGMSYGSLFDATQTK	S17:+79.96633	17	281	a6.a3	gi|116628477|ref|YP_821096.1|STER_1761|Glyceraldehyde-3-phosphate dehydrogenase [Streptococcus thermophilus LMD-9]_hit-name:gapA1 _hit-score:633_hit-evalue:0.0_identity-percent:94.6428571428571	0	1
132	AATNESYGYTEDPIVSSDIVGMSYGSLFDATQTK	Y9:+79.96633	9	273	a6.a3	gi|116628477|ref|YP_821096.1|STER_1761|Glyceraldehyde-3-phosphate dehydrogenase [Streptococcus thermophilus LMD-9]_hit-name:gapA1 _hit-score:633_hit-evalue:0.0_identity-percent:94.6428571428571	0	1
133	AATNESYGYTEDPIVSSDIVGMSYGSLFDATQTK	T3:+79.96633	3	267	a6.a3	gi|116628477|ref|YP_821096.1|STER_1761|Glyceraldehyde-3-phosphate dehydrogenase [Streptococcus thermophilus LMD-9]_hit-name:gapA1 _hit-score:633_hit-evalue:0.0_identity-percent:94.6428571428571	0	1
134	VDSVSSVGPEK	S5:+79.96633	5	301	a7.a1	gi|116628133|ref|YP_820752.1|STER_1392|serine/threonine protein kinase, fused to several beta-lactam (PASTA) domains [Streptococcus thermophilus LMD-9]_hit-name:pknB _hit-score:1052_hit-evalue:0.0_identity-percent:94.4922547332186	0	1
135	VVFDDMTDTKTLPK	T9:+79.96633	9	291	a7.a1	gi|116628133|ref|YP_820752.1|STER_1392|serine/threonine protein kinase, fused to several beta-lactam (PASTA) domains [Streptococcus thermophilus LMD-9]_hit-name:pknB _hit-score:1052_hit-evalue:0.0_identity-percent:94.4922547332186	0	16
136	VVFDDMTDTKTLPK	T7:+79.96633	7	289	a7.a1	gi|116628133|ref|YP_820752.1|STER_1392|serine/threonine protein kinase, fused to several beta-lactam (PASTA) domains [Streptococcus thermophilus LMD-9]_hit-name:pknB _hit-score:1052_hit-evalue:0.0_identity-percent:94.4922547332186	0	1
137	VVFDDMTDTKTLPKVDSVSSVGPEK	T11:+79.96633	11	293	a7.a1	gi|116628133|ref|YP_820752.1|STER_1392|serine/threonine protein kinase, fused to several beta-lactam (PASTA) domains [Streptococcus thermophilus LMD-9]_hit-name:pknB _hit-score:1052_hit-evalue:0.0_identity-percent:94.4922547332186	0	1
138	VVFDDMTDTKTLPK	M6:+15.99491 - T9:+79.96633	9	291	a7.a1	gi|116628133|ref|YP_820752.1|STER_1392|serine/threonine protein kinase, fused to several beta-lactam (PASTA) domains [Streptococcus thermophilus LMD-9]_hit-name:pknB _hit-score:1052_hit-evalue:0.0_identity-percent:94.4922547332186	0	9
139	VVFDDMTDTKTLPKVDSVSSVGPEK	T7:+79.96633	7	289	a7.a1	gi|116628133|ref|YP_820752.1|STER_1392|serine/threonine protein kinase, fused to several beta-lactam (PASTA) domains [Streptococcus thermophilus LMD-9]_hit-name:pknB _hit-score:1052_hit-evalue:0.0_identity-percent:94.4922547332186	0	2
140	VVFDDMTDTK	M6:+15.99491 - T9:+79.96633	9	291	a7.a1	gi|116628133|ref|YP_820752.1|STER_1392|serine/threonine protein kinase, fused to several beta-lactam (PASTA) domains [Streptococcus thermophilus LMD-9]_hit-name:pknB _hit-score:1052_hit-evalue:0.0_identity-percent:94.4922547332186	0	1
141	VVFDDMTDTK	T9:+79.96633	9	291	a7.a1	gi|116628133|ref|YP_820752.1|STER_1392|serine/threonine protein kinase, fused to several beta-lactam (PASTA) domains [Streptococcus thermophilus LMD-9]_hit-name:pknB _hit-score:1052_hit-evalue:0.0_identity-percent:94.4922547332186	0	2
142	VVFDDMTDTKTLPKVDSVSSVGPEK	T9:+79.96633	9	291	a7.a1	gi|116628133|ref|YP_820752.1|STER_1392|serine/threonine protein kinase, fused to several beta-lactam (PASTA) domains [Streptococcus thermophilus LMD-9]_hit-name:pknB _hit-score:1052_hit-evalue:0.0_identity-percent:94.4922547332186	0	1
143	VTDFGIAVAFAETSLTQTNSMLGSVHYLSPEQAR	S14:+79.96633	14	165	a7.a2	gi|116628133|ref|YP_820752.1|STER_1392|serine/threonine protein kinase, fused to several beta-lactam (PASTA) domains [Streptococcus thermophilus LMD-9]_hit-name:pknB _hit-score:1052_hit-evalue:0.0_identity-percent:94.4922547332186	0	1
144	TENASAGVMISASHNPALDNGIK	M9:+15.99491 - S13:+79.96633	13	101	a8.a1	gi|116627995|ref|YP_820614.1|STER_1230|Phosphomannomutase [Streptococcus thermophilus LMD-9]_hit-name:pgmA _hit-score:49_hit-evalue:2e-07_identity-percent:37.0967741935484	3	4
145	TENASAGVMISASHNPALDNGIK	M9:+15.99491 - S11:+79.96633	11	99	a8.a1	gi|116627995|ref|YP_820614.1|STER_1230|Phosphomannomutase [Streptococcus thermophilus LMD-9]_hit-name:pgmA _hit-score:49_hit-evalue:2e-07_identity-percent:37.0967741935484	0	2
146	TENASAGVMISASHNPALDNGIK	S11:+79.96633	11	99	a8.a1	gi|116627995|ref|YP_820614.1|STER_1230|Phosphomannomutase [Streptococcus thermophilus LMD-9]_hit-name:pgmA _hit-score:49_hit-evalue:2e-07_identity-percent:37.0967741935484	6	6
147	TENASAGVMISASHNPALDNGIK	S13:+79.96633	13	101	a8.a1	gi|116627995|ref|YP_820614.1|STER_1230|Phosphomannomutase [Streptococcus thermophilus LMD-9]_hit-name:pgmA _hit-score:49_hit-evalue:2e-07_identity-percent:37.0967741935484	2	5
148	ARDNGYAVGGFNTNNLEWTQAILR	Y6:+79.96633	6	18	a9.a1	gi|116628570|ref|YP_821189.1|STER_1876|Fructose/tagatose bisphosphate aldolase [Streptococcus thermophilus LMD-9]_hit-name:tnp1191 _hit-score:_hit-evalue:1.2_identity-percent:29.1666666666667	2	2
149	ARDNGYAVGGFNTNNLEWTQAILR	T13:+79.96633	13	25	a9.a1	gi|116628570|ref|YP_821189.1|STER_1876|Fructose/tagatose bisphosphate aldolase [Streptococcus thermophilus LMD-9]_hit-name:tnp1191 _hit-score:_hit-evalue:1.2_identity-percent:29.1666666666667	2	2
150	NGYAVGGFNTNNLEWTQAILR	Y3:+79.96633 - N1:+42.01056	3	18	a9.a1	gi|116628570|ref|YP_821189.1|STER_1876|Fructose/tagatose bisphosphate aldolase [Streptococcus thermophilus LMD-9]_hit-name:tnp1191 _hit-score:_hit-evalue:1.2_identity-percent:29.1666666666667	2	2
151	NGYAVGGFNTNNLEWTQAILR	T10:+79.96633 - N1:+42.01056	10	25	a9.a1	gi|116628570|ref|YP_821189.1|STER_1876|Fructose/tagatose bisphosphate aldolase [Streptococcus thermophilus LMD-9]_hit-name:tnp1191 _hit-score:_hit-evalue:1.2_identity-percent:29.1666666666667	0	1
152	SAEKFVQAARDNGYAVGGFNTNNLEWTQAILR	S1:+79.96633 - S1:+42.01056	14	18	a9.a1	gi|116628570|ref|YP_821189.1|STER_1876|Fructose/tagatose bisphosphate aldolase [Streptococcus thermophilus LMD-9]_hit-name:tnp1191 _hit-score:_hit-evalue:1.2_identity-percent:29.1666666666667	2	1
153	SAEKFVQAARDNGYAVGGFNTNNLEWTQAILR	Y14:+79.96633 - S1:+42.01056	1	5	a9.a1	gi|116628570|ref|YP_821189.1|STER_1876|Fructose/tagatose bisphosphate aldolase [Streptococcus thermophilus LMD-9]_hit-name:tnp1191 _hit-score:_hit-evalue:1.2_identity-percent:29.1666666666667	2	0
154	AEKFVQAARDNGYAVGGFNTNNLEWTQAILR	T20:+79.96633 - Y13:+79.96633 - A1:+42.01056	20 and 13	25 and 18	a9.a1	gi|116628570|ref|YP_821189.1|STER_1876|Fructose/tagatose bisphosphate aldolase [Streptococcus thermophilus LMD-9]_hit-name:tnp1191 _hit-score:_hit-evalue:1.2_identity-percent:29.1666666666667	0	2
155	NGYAVGGFNTNNLEWTQAILR	Y3:+79.96633	10	25	a9.a1	gi|116628570|ref|YP_821189.1|STER_1876|Fructose/tagatose bisphosphate aldolase [Streptococcus thermophilus LMD-9]_hit-name:tnp1191 _hit-score:_hit-evalue:1.2_identity-percent:29.1666666666667	2	0
156	NGYAVGGFNTNNLEWTQAILR	T10:+79.96633	3	18	a9.a1	gi|116628570|ref|YP_821189.1|STER_1876|Fructose/tagatose bisphosphate aldolase [Streptococcus thermophilus LMD-9]_hit-name:tnp1191 _hit-score:_hit-evalue:1.2_identity-percent:29.1666666666667	1	0
157	EKFVQAARDNGYAVGGFNTNNLEWTQAILR	T19:+79.96633 - Y12:+79.96633 - E1:+42.01056	19 and 12	25 and 18	a9.a1	gi|116628570|ref|YP_821189.1|STER_1876|Fructose/tagatose bisphosphate aldolase [Streptococcus thermophilus LMD-9]_hit-name:tnp1191 _hit-score:_hit-evalue:1.2_identity-percent:29.1666666666667	1	0
158	VNVNTECQIAFANATR	C7:+57.02146 - T5:+79.96633	5	233	a9.a2	gi|116628570|ref|YP_821189.1|STER_1876|Fructose/tagatose bisphosphate aldolase [Streptococcus thermophilus LMD-9]_hit-name:tnp1191 _hit-score:_hit-evalue:1.2_identity-percent:29.1666666666667	1	6
159	LTEAVPGFPIVLHGGSGIPDDQIQEAIK	S16:+79.96633	16	211	a9.a3	gi|116628570|ref|YP_821189.1|STER_1876|Fructose/tagatose bisphosphate aldolase [Streptococcus thermophilus LMD-9]_hit-name:tnp1191 _hit-score:_hit-evalue:1.2_identity-percent:29.1666666666667	2	2
160	VQGAFFNSGQYQMIFGTGTVNK	M13:+15.99491 - S8:+79.96633	8	58	b10.a1	gi|116628430|ref|YP_821049.1|STER_1710|sucrose PTS, EIIBCA [Streptococcus thermophilus LMD-9]_hit-name:scrA _hit-score:1031_hit-evalue:0.0_identity-percent:85.4660347551343	0	2
161	VQGAFFNSGQYQMIFGTGTVNK	T17:+79.96633	17	67	b10.a1	gi|116628430|ref|YP_821049.1|STER_1710|sucrose PTS, EIIBCA [Streptococcus thermophilus LMD-9]_hit-name:scrA _hit-score:1031_hit-evalue:0.0_identity-percent:85.4660347551343	3	5
162	VQGAFFNSGQYQMIFGTGTVNK	S8:+79.96633	8	58	b10.a1	gi|116628430|ref|YP_821049.1|STER_1710|sucrose PTS, EIIBCA [Streptococcus thermophilus LMD-9]_hit-name:scrA _hit-score:1031_hit-evalue:0.0_identity-percent:85.4660347551343	10	3
163	VQGAFFNSGQYQMIFGTGTVNK	Y11:+79.96633	11	61	b10.a1	gi|116628430|ref|YP_821049.1|STER_1710|sucrose PTS, EIIBCA [Streptococcus thermophilus LMD-9]_hit-name:scrA _hit-score:1031_hit-evalue:0.0_identity-percent:85.4660347551343	0	1
164	TASGFVLAGASHETTK	S11:+79.96633	11	31	b11.a1	gi|116627145|ref|YP_819764.1|STER_0252|groES|Co-chaperonin GroES (HSP10) [Streptococcus thermophilus LMD-9]_hit-name:groES _hit-score:181_hit-evalue:2e-48_identity-percent:100	7	10
165	TASGFVLAGASHETTK	S3:+79.96633	3	23	b11.a1	gi|116627145|ref|YP_819764.1|STER_0252|groES|Co-chaperonin GroES (HSP10) [Streptococcus thermophilus LMD-9]_hit-name:groES _hit-score:181_hit-evalue:2e-48_identity-percent:100	3	5
166	TASGFVLAGASHETTK	T14:+79.96633	14	34	b11.a1	gi|116627145|ref|YP_819764.1|STER_0252|groES|Co-chaperonin GroES (HSP10) [Streptococcus thermophilus LMD-9]_hit-name:groES _hit-score:181_hit-evalue:2e-48_identity-percent:100	0	1
167	TLTGELIAPSVAVGDK	S10:+79.96633	10	58	b11.a2	gi|116627145|ref|YP_819764.1|STER_0252|groES|Co-chaperonin GroES (HSP10) [Streptococcus thermophilus LMD-9]_hit-name:groES _hit-score:181_hit-evalue:2e-48_identity-percent:100	2	0
168	DYASIDAAPEER	S4:+79.96633	4	52	b12.a1	gi|116627379|ref|YP_819998.1|STER_0524|GTPase - translation elongation factor [Streptococcus thermophilus LMD-9]_hit-name:tuf _hit-score:726_hit-evalue:0.0_identity-percent:92.713567839196	5	4
169	DYASIDAAPEER	Y2:+79.96633	2	50	b12.a1	gi|116627379|ref|YP_819998.1|STER_0524|GTPase - translation elongation factor [Streptococcus thermophilus LMD-9]_hit-name:tuf _hit-score:726_hit-evalue:0.0_identity-percent:92.713567839196	0	1
170	VNTPKDYASIDAAPEER	T3:+79.96633 - Y7:+79.96633	3 and 7	46 and 50	b12.a1	gi|116627379|ref|YP_819998.1|STER_0524|GTPase - translation elongation factor [Streptococcus thermophilus LMD-9]_hit-name:tuf _hit-score:726_hit-evalue:0.0_identity-percent:92.713567839196	0	1
171	DLLSEYDFPGDDIPVIQGSALK	S19:+79.96633	19	177	b12.a2	gi|116627379|ref|YP_819998.1|STER_0524|GTPase - translation elongation factor [Streptococcus thermophilus LMD-9]_hit-name:tuf _hit-score:726_hit-evalue:0.0_identity-percent:92.713567839196	0	1
172	DLLSEYDFPGDDIPVIQGSALK	Y6:+79.96633	6	164	b12.a2	gi|116627379|ref|YP_819998.1|STER_0524|GTPase - translation elongation factor [Streptococcus thermophilus LMD-9]_hit-name:tuf _hit-score:726_hit-evalue:0.0_identity-percent:92.713567839196	7	4
173	DTDKPLLLPVEDVFSITGR	T17:+79.96633	17	225	b12.a3	gi|116627379|ref|YP_819998.1|STER_0524|GTPase - translation elongation factor [Streptococcus thermophilus LMD-9]_hit-name:tuf _hit-score:726_hit-evalue:0.0_identity-percent:92.713567839196	0	1
174	DTDKPLLLPVEDVFSITGR	S15:+79.96633	15	223	b12.a3	gi|116627379|ref|YP_819998.1|STER_0524|GTPase - translation elongation factor [Streptococcus thermophilus LMD-9]_hit-name:tuf _hit-score:726_hit-evalue:0.0_identity-percent:92.713567839196	0	1
175	GITINTAHVEYETEK	T3:+79.96633	3	65	b12.a4	gi|116627379|ref|YP_819998.1|STER_0524|GTPase - translation elongation factor [Streptococcus thermophilus LMD-9]_hit-name:tuf _hit-score:726_hit-evalue:0.0_identity-percent:92.713567839196	1	0
176	SKITTSLLQEMVQAAATR	T4:+79.96633	4	5	b13.a1	gi|116628556|ref|YP_821175.1|STER_1854|Predicted kinase related to dihydroxyacetone kinase [Streptococcus thermophilus LMD-9]_hit-name:rpoC _hit-score:30_hit-evalue:0.10_identity-percent:19.8412698412698	0	1
177	SKITTSLLQEMVQAAATR	T5:+79.96633	5	6	b13.a1	gi|116628556|ref|YP_821175.1|STER_1854|Predicted kinase related to dihydroxyacetone kinase [Streptococcus thermophilus LMD-9]_hit-name:rpoC _hit-score:30_hit-evalue:0.10_identity-percent:19.8412698412698	0	1
178	SKITTSLLQEMVQAAATR	S6:+79.96633	6	7	b13.a1	gi|116628556|ref|YP_821175.1|STER_1854|Predicted kinase related to dihydroxyacetone kinase [Streptococcus thermophilus LMD-9]_hit-name:rpoC _hit-score:30_hit-evalue:0.10_identity-percent:19.8412698412698	2	0
179	SKITTSLLQEMVQAAATR	S1:+79.96633	1	2	b13.a1	gi|116628556|ref|YP_821175.1|STER_1854|Predicted kinase related to dihydroxyacetone kinase [Streptococcus thermophilus LMD-9]_hit-name:rpoC _hit-score:30_hit-evalue:0.10_identity-percent:19.8412698412698	1	1
180	ITTSLLQEMVQAAATR	S4:+79.96633	4	7	b13.a1	gi|116628556|ref|YP_821175.1|STER_1854|Predicted kinase related to dihydroxyacetone kinase [Streptococcus thermophilus LMD-9]_hit-name:rpoC _hit-score:30_hit-evalue:0.10_identity-percent:19.8412698412698	1	6
181	ITTSLLQEMVQAAATR	T3:+79.96633	3	6	b13.a1	gi|116628556|ref|YP_821175.1|STER_1854|Predicted kinase related to dihydroxyacetone kinase [Streptococcus thermophilus LMD-9]_hit-name:rpoC _hit-score:30_hit-evalue:0.10_identity-percent:19.8412698412698	2	2
182	ITTSLLQEMVQAAATR	T2:+79.96633	2	5	b13.a1	gi|116628556|ref|YP_821175.1|STER_1854|Predicted kinase related to dihydroxyacetone kinase [Streptococcus thermophilus LMD-9]_hit-name:rpoC _hit-score:30_hit-evalue:0.10_identity-percent:19.8412698412698	0	1
183	SGETEDSTIADIAVATNAGQIK	T8:+79.96633	8	380	b14.a1	gi|116627519|ref|YP_820138.1|STER_0684|eno|Enolase [Streptococcus thermophilus LMD-9]_hit-name:eno _hit-score:853_hit-evalue:0.0_identity-percent:99.5391705069124	1	2
184	SGETEDSTIADIAVATNAGQIK	S1:+79.96633	1	373	b14.a1	gi|116627519|ref|YP_820138.1|STER_0684|eno|Enolase [Streptococcus thermophilus LMD-9]_hit-name:eno _hit-score:853_hit-evalue:0.0_identity-percent:99.5391705069124	2	1
185	SGETEDSTIADIAVATNAGQIK	T4:+79.96633	4	376	b14.a1	gi|116627519|ref|YP_820138.1|STER_0684|eno|Enolase [Streptococcus thermophilus LMD-9]_hit-name:eno _hit-score:853_hit-evalue:0.0_identity-percent:99.5391705069124	1	1
186	EAGYTAVVSHRSGETEDSTIADIAVATNAGQIK	S12:+79.96633	12	373	b14.a1	gi|116627519|ref|YP_820138.1|STER_0684|eno|Enolase [Streptococcus thermophilus LMD-9]_hit-name:eno _hit-score:853_hit-evalue:0.0_identity-percent:99.5391705069124	1	0
187	MSIITDVYAR	M1:+15.99491 - S2:+79.96633	2	2	b14.a2	gi|116627519|ref|YP_820138.1|STER_0684|eno|Enolase [Streptococcus thermophilus LMD-9]_hit-name:eno _hit-score:853_hit-evalue:0.0_identity-percent:99.5391705069124	1	5
188	GMVPSGASTGEHEAVELR	S5:+79.96633	5	39	b14.a3	gi|116627519|ref|YP_820138.1|STER_0684|eno|Enolase [Streptococcus thermophilus LMD-9]_hit-name:eno _hit-score:853_hit-evalue:0.0_identity-percent:99.5391705069124	2	1
189	GMVPSGASTGEHEAVELR	S8:+79.96633	8	42	b14.a3	gi|116627519|ref|YP_820138.1|STER_0684|eno|Enolase [Streptococcus thermophilus LMD-9]_hit-name:eno _hit-score:853_hit-evalue:0.0_identity-percent:99.5391705069124	1	0
190	YATSVDLDGK	T3:+79.96633	3	60	b15.a1	gi|116628669|ref|YP_821288.1|STER_1987|Uncharacterized conserved protein containing XRE-family DNA-binding domain [Streptococcus thermophilus LMD-9]_hit-name:purH _hit-score:25_hit-evalue:1.1_identity-percent:38.8888888888889	0	10
191	YATSVDLDGK	Y1:+79.96633	1	58	b15.a1	gi|116628669|ref|YP_821288.1|STER_1987|Uncharacterized conserved protein containing XRE-family DNA-binding domain [Streptococcus thermophilus LMD-9]_hit-name:purH _hit-score:25_hit-evalue:1.1_identity-percent:38.8888888888889	0	2
192	DIQQEALEKYATSVDLDGK	T12:+79.96633	12	60	b15.a1	gi|116628669|ref|YP_821288.1|STER_1987|Uncharacterized conserved protein containing XRE-family DNA-binding domain [Streptococcus thermophilus LMD-9]_hit-name:purH _hit-score:25_hit-evalue:1.1_identity-percent:38.8888888888889	0	1
193	KEDILDTKVPMSR	T7:+79.96633	7	96	b15.a2	gi|116628669|ref|YP_821288.1|STER_1987|Uncharacterized conserved protein containing XRE-family DNA-binding domain [Streptococcus thermophilus LMD-9]_hit-name:purH _hit-score:25_hit-evalue:1.1_identity-percent:38.8888888888889	0	3
194	GFTDETVR	T6:+79.96633	6	7	b16.a1	gi|116628624|ref|YP_821243.1|STER_1937|hypothetical protein STER_1937 [Streptococcus thermophilus LMD-9]_hit-name:citB _hit-score:27_hit-evalue:0.044_identity-percent:29.6296296296296	0	8
195	GFTDETVRFNLNDGDK	T6:+79.96633	6	7	b16.a1	gi|116628624|ref|YP_821243.1|STER_1937|hypothetical protein STER_1937 [Streptococcus thermophilus LMD-9]_hit-name:citB _hit-score:27_hit-evalue:0.044_identity-percent:29.6296296296296	0	5
196	FTDETVRFNLNDGDKNEISNTLTNVYR	T2:+79.96633 - T5:+79.96633	2 and 5	4 and 7	b16.a1	gi|116628624|ref|YP_821243.1|STER_1937|hypothetical protein STER_1937 [Streptococcus thermophilus LMD-9]_hit-name:citB _hit-score:27_hit-evalue:0.044_identity-percent:29.6296296296296	1	2
197	GFTDETVRFNLNDGDKNEISNTLTNVYR	T6:+79.96633	6	7	b16.a1	gi|116628624|ref|YP_821243.1|STER_1937|hypothetical protein STER_1937 [Streptococcus thermophilus LMD-9]_hit-name:citB _hit-score:27_hit-evalue:0.044_identity-percent:29.6296296296296	0	2
198	GFTDETVRFNLNDGDKNEISNTLTNVYR	T3:+79.96633	3	4	b16.a1	gi|116628624|ref|YP_821243.1|STER_1937|hypothetical protein STER_1937 [Streptococcus thermophilus LMD-9]_hit-name:citB _hit-score:27_hit-evalue:0.044_identity-percent:29.6296296296296	0	1
199	GFTDETVRFNLNDGDKNEISNTLTNVYR	T6:+79.96633 - G1:+42.01057	6	7	b16.a1	gi|116628624|ref|YP_821243.1|STER_1937|hypothetical protein STER_1937 [Streptococcus thermophilus LMD-9]_hit-name:citB _hit-score:27_hit-evalue:0.044_identity-percent:29.6296296296296	0	1
200	DFHIVAETGIHAR	T8:+79.96633	8	12	b17.a1	gi|116628008|ref|YP_820627.1|STER_1243|Phosphotransferase system, HPr-related protein [Streptococcus thermophilus LMD-9]_hit-name:ptsH _hit-score:146_hit-evalue:7e-38_identity-percent:88.5057471264368	8	10
201	SIMGVMSLGVGQGADVTISAEGPDADDAIAAIAETMTK	T17:+79.96633	17	62	b17.a2	gi|116628008|ref|YP_820627.1|STER_1243|Phosphotransferase system, HPr-related protein [Streptococcus thermophilus LMD-9]_hit-name:ptsH _hit-score:146_hit-evalue:7e-38_identity-percent:88.5057471264368	0	1
202	FASDITLEYK	S3:+79.96633	3	31	b17.a3	gi|116628008|ref|YP_820627.1|STER_1243|Phosphotransferase system, HPr-related protein [Streptococcus thermophilus LMD-9]_hit-name:ptsH _hit-score:146_hit-evalue:7e-38_identity-percent:88.5057471264368	0	1
203	EASILELNDLVK	S3:+79.96633	3	16	b18.a1	gi|116627418|ref|YP_820037.1|STER_0568|rplL|Ribosomal protein L7/L12 [Streptococcus thermophilus LMD-9]_hit-name:rplL _hit-score:125_hit-evalue:2e-31_identity-percent:68.5714285714286	5	5
204	AIVDGAPSVIK	S8:+79.96633	8	94	b18.a2	gi|116627418|ref|YP_820037.1|STER_0568|rplL|Ribosomal protein L7/L12 [Streptococcus thermophilus LMD-9]_hit-name:rplL _hit-score:125_hit-evalue:2e-31_identity-percent:68.5714285714286	1	0
205	EGVSAAEAEEIK	S4:+79.96633	4	101	b18.a2	gi|116627418|ref|YP_820037.1|STER_0568|rplL|Ribosomal protein L7/L12 [Streptococcus thermophilus LMD-9]_hit-name:rplL _hit-score:125_hit-evalue:2e-31_identity-percent:68.5714285714286	2	3
206	DSFDVELTSAGDK	S9:+79.96633	9	62	b18.a3	gi|116627418|ref|YP_820037.1|STER_0568|rplL|Ribosomal protein L7/L12 [Streptococcus thermophilus LMD-9]_hit-name:rplL _hit-score:125_hit-evalue:2e-31_identity-percent:68.5714285714286	1	0
207	DSFDVELTSAGDK	S2:+79.96633	2	55	b18.a3	gi|116627418|ref|YP_820037.1|STER_0568|rplL|Ribosomal protein L7/L12 [Streptococcus thermophilus LMD-9]_hit-name:rplL _hit-score:125_hit-evalue:2e-31_identity-percent:68.5714285714286	1	0
208	DSFDVELTSAGDK	T8:+79.96633	8	61	b18.a3	gi|116627418|ref|YP_820037.1|STER_0568|rplL|Ribosomal protein L7/L12 [Streptococcus thermophilus LMD-9]_hit-name:rplL _hit-score:125_hit-evalue:2e-31_identity-percent:68.5714285714286	1	1
209	VTPQPNRIPVENTVEVPQPVDGENHEQK	T13:+79.96633	13	427	b19.a1	gi|116627604|ref|YP_820223.1|STER_0776|Actin-like ATPase involved in cell division [Streptococcus thermophilus LMD-9]_hit-name:ftsA _hit-score:850_hit-evalue:0.0_identity-percent:96.5065502183406	0	4
210	IPVENTVEVPQPVDGENHEQK	T6:+79.96633	6	427	b19.a1	gi|116627604|ref|YP_820223.1|STER_0776|Actin-like ATPase involved in cell division [Streptococcus thermophilus LMD-9]_hit-name:ftsA _hit-score:850_hit-evalue:0.0_identity-percent:96.5065502183406	0	7
211	QLINDYEETHASTIAVMPVSSEEVSAYGVIAPQGK	S20:+79.96633	20	168	b20.a1	gi|116628515|ref|YP_821134.1|STER_1810|UDP-glucose pyrophosphorylase [Streptococcus thermophilus LMD-9]_hit-name:galU _hit-score:595_hit-evalue:1e-172_identity-percent:98.3552631578947	3	2
212	QLINDYEETHASTIAVMPVSSEEVSAYGVIAPQGK	S21:+79.96633	21	169	b20.a1	gi|116628515|ref|YP_821134.1|STER_1810|UDP-glucose pyrophosphorylase [Streptococcus thermophilus LMD-9]_hit-name:galU _hit-score:595_hit-evalue:1e-172_identity-percent:98.3552631578947	4	3
213	QLINDYEETHASTIAVMPVSSEEVSAYGVIAPQGK	M17:+15.99491 - S20:+79.96633	20	168	b20.a1	gi|116628515|ref|YP_821134.1|STER_1810|UDP-glucose pyrophosphorylase [Streptococcus thermophilus LMD-9]_hit-name:galU _hit-score:595_hit-evalue:1e-172_identity-percent:98.3552631578947	0	1
214	QLINDYEETHASTIAVMPVSSEEVSAYGVIAPQGK	M17:+15.99491 - S20:+79.96633 - Q1:-17.02655	20	168	b20.a1	gi|116628515|ref|YP_821134.1|STER_1810|UDP-glucose pyrophosphorylase [Streptococcus thermophilus LMD-9]_hit-name:galU _hit-score:595_hit-evalue:1e-172_identity-percent:98.3552631578947	1	0
215	NPQTGETISIAASK	S9:+79.96633	9	71	b21.a1	gi|116627943|ref|YP_820562.1|STER_1175|nucleoid DNA-binding protein [Streptococcus thermophilus LMD-9]_hit-name:hstH _hit-score:142_hit-evalue:7e-37_identity-percent:84.6153846153846	5	7
216	NLSIPQETEILK	T8:+79.96633	8	139	b22.a1	gi|116627174|ref|YP_819793.1|STER_0288|Predicted periplasmic solute-binding protein [Streptococcus thermophilus LMD-9]_hit-name:pabC _hit-score:1149_hit-evalue:0.0_identity-percent:91.1854103343465	0	6
217	HNEYSESAEDSLSFK	S11:+79.96633	11	15	b22.a2	gi|116627174|ref|YP_819793.1|STER_0288|Predicted periplasmic solute-binding protein [Streptococcus thermophilus LMD-9]_hit-name:pabC _hit-score:1149_hit-evalue:0.0_identity-percent:91.1854103343465	0	3
218	EAIYTNPK	Y4:+79.96633	4	182	b22.a3	gi|116627174|ref|YP_819793.1|STER_0288|Predicted periplasmic solute-binding protein [Streptococcus thermophilus LMD-9]_hit-name:pabC _hit-score:1149_hit-evalue:0.0_identity-percent:91.1854103343465	0	2
219	LANDEESIMAFVQAMK	S7:+79.96633	7	391	b23.a1	gi|116627321|ref|YP_819940.1|STER_0461|tRNA nucleotidyltransferase/poly(A) polymerase [Streptococcus thermophilus LMD-9]_hit-name:papL _hit-score:787_hit-evalue:0.0_identity-percent:99.2537313432836	5	5
220	KDTSDSSSNQSTVVIK	S4:+79.96633 - T3:+79.96633	4 and 3	65 and 64	b24.a1	gi|116627311|ref|YP_819930.1|STER_0449|hypothetical protein STER_0449 [Streptococcus thermophilus LMD-9]_hit-name:cbpD3 _hit-score:25_hit-evalue:0.60_identity-percent:42.8571428571429	6	10
221	NTTIPTSK	T3:+79.96633	3	387	b25.a1	gi|116627083|ref|YP_819702.1|STER_0163|Molecular chaperone [Streptococcus thermophilus LMD-9]_hit-name:dnaK _hit-score:1061_hit-evalue:0.0_identity-percent:92.5864909390445	1	1
222	LYEQAAAAQQAQAGAEGAQATDNSGDDVVDGEFTEK	S24:+79.96633	24	595	b25.a2	gi|116627083|ref|YP_819702.1|STER_0163|Molecular chaperone [Streptococcus thermophilus LMD-9]_hit-name:dnaK _hit-score:1061_hit-evalue:0.0_identity-percent:92.5864909390445	1	2
223	EQTIVIQSNSGLTDEEIER	S10:+79.96633	10	475	b25.a3	gi|116627083|ref|YP_819702.1|STER_0163|Molecular chaperone [Streptococcus thermophilus LMD-9]_hit-name:dnaK _hit-score:1061_hit-evalue:0.0_identity-percent:92.5864909390445	1	0
224	EQTIVIQSNSGLTDEEIER	S8:+79.96633	8	473	b25.a3	gi|116627083|ref|YP_819702.1|STER_0163|Molecular chaperone [Streptococcus thermophilus LMD-9]_hit-name:dnaK _hit-score:1061_hit-evalue:0.0_identity-percent:92.5864909390445	0	1
225	VTKAVITVPAYFNDAQR	T2:+79.96633 - T7:+79.96633	2 and 7	110 and 115	b25.a4	gi|116627083|ref|YP_819702.1|STER_0163|Molecular chaperone [Streptococcus thermophilus LMD-9]_hit-name:dnaK _hit-score:1061_hit-evalue:0.0_identity-percent:92.5864909390445	1	0
226	FQAAAGQLDQTAR	T11:+79.96633	11	47	b26.a1	gi|116628590|ref|YP_821209.1|STER_1899|Ribosomal protein L29 [Streptococcus thermophilus LMD-9]_hit-name:rpmC _hit-score:98_hit-evalue:2e-23_identity-percent:79.4117647058823	0	8
227	GLSQEELAK	S3:+79.96633	3	17	b26.a2	gi|116628590|ref|YP_821209.1|STER_1899|Ribosomal protein L29 [Streptococcus thermophilus LMD-9]_hit-name:rpmC _hit-score:98_hit-evalue:2e-23_identity-percent:79.4117647058823	1	1
228	FSVATSENEVK	T5:+79.96633	5	472	b27.a1	gi|116628117|ref|YP_820736.1|STER_1367|Na+/xyloside symporter or related transporter [Streptococcus thermophilus LMD-9]_hit-name:lacS _hit-score:1133_hit-evalue:0.0_identity-percent:91.1671924290221	0	3
229	ANVVSLVTPTTGYLVDLSSVNDEHFASGSMGK	S18:+79.96633	18	496	b27.a2	gi|116628117|ref|YP_820736.1|STER_1367|Na+/xyloside symporter or related transporter [Streptococcus thermophilus LMD-9]_hit-name:lacS _hit-score:1133_hit-evalue:0.0_identity-percent:91.1671924290221	0	1
230	ANVVSLVTPTTGYLVDLSSVNDEHFASGSMGK	T8:+79.96633	8	486	b27.a2	gi|116628117|ref|YP_820736.1|STER_1367|Na+/xyloside symporter or related transporter [Streptococcus thermophilus LMD-9]_hit-name:lacS _hit-score:1133_hit-evalue:0.0_identity-percent:91.1671924290221	0	1
231	ANVVSLVTPTTGYLVDLSSVNDEHFASGSMGK	S19:+79.96633	19	497	b27.a2	gi|116628117|ref|YP_820736.1|STER_1367|Na+/xyloside symporter or related transporter [Streptococcus thermophilus LMD-9]_hit-name:lacS _hit-score:1133_hit-evalue:0.0_identity-percent:91.1671924290221	0	1
232	NGLDDTVLVTVTNSEK	T6:+79.96633	6	597	b27.a3	gi|116628117|ref|YP_820736.1|STER_1367|Na+/xyloside symporter or related transporter [Streptococcus thermophilus LMD-9]_hit-name:lacS _hit-score:1133_hit-evalue:0.0_identity-percent:91.1671924290221	0	1
233	LDAALAASQDELSVIREK	S13:+79.96633	13	56	b28.a1	gi|116628007|ref|YP_820626.1|STER_1242|Phosphoenolpyruvate-protein kinase (PTS system EI component in bacteria) [Streptococcus thermophilus LMD-9]_hit-name:ptsI _hit-score:1082_hit-evalue:0.0_identity-percent:97.5736568457539	2	5
234	LDAALAASQDELSVIREK	S8:+79.96633	8	51	b28.a1	gi|116628007|ref|YP_820626.1|STER_1242|Phosphoenolpyruvate-protein kinase (PTS system EI component in bacteria) [Streptococcus thermophilus LMD-9]_hit-name:ptsI _hit-score:1082_hit-evalue:0.0_identity-percent:97.5736568457539	1	0
235	ASADELQAIIDEAWKNPEFQEASK	S23:+79.96633	23	326	b29.a1	gi|116628019|ref|YP_820638.1|STER_1257|ldh|L-lactate dehydrogenase [Streptococcus thermophilus LMD-9]_hit-name:ldh _hit-score:642_hit-evalue:0.0_identity-percent:100	7	5
236	MKASADELQAIIDEAWKNPEFQEASK	S25:+79.96633	25	326	b29.a1	gi|116628019|ref|YP_820638.1|STER_1257|ldh|L-lactate dehydrogenase [Streptococcus thermophilus LMD-9]_hit-name:ldh _hit-score:642_hit-evalue:0.0_identity-percent:100	1	0
237	AVGDALDLSHALPFTSPK	S9:+79.96633	9	55	b29.a2	gi|116628019|ref|YP_820638.1|STER_1257|ldh|L-lactate dehydrogenase [Streptococcus thermophilus LMD-9]_hit-name:ldh _hit-score:642_hit-evalue:0.0_identity-percent:100	0	1
238	MTTENIGEIVIAPR	M1:+15.99491 - T3:+79.96633 - M1:+42.01057	3	3	b30.a1	gi|116628434|ref|YP_821053.1|STER_1714|hypothetical protein STER_1714 [Streptococcus thermophilus LMD-9]_hit-name:asp _hit-score:52_hit-evalue:3e-09_identity-percent:28.9719626168224	1	2
239	MTTENIGEIVIAPR	M1:+15.99491 - T2:+79.96633 - M1:+42.01057	2	2	b30.a1	gi|116628434|ref|YP_821053.1|STER_1714|hypothetical protein STER_1714 [Streptococcus thermophilus LMD-9]_hit-name:asp _hit-score:52_hit-evalue:3e-09_identity-percent:28.9719626168224	4	0
240	SDVQKTQVLR	T6:+79.96633	6	68	b31.a1	gi|116627607|ref|YP_820226.1|STER_0779|Cell division protein [Streptococcus thermophilus LMD-9]_hit-name:int _hit-score:27_hit-evalue:0.22_identity-percent:29.5454545454545	0	7
241	MAESIAGQK	S4:+79.96633	4	77	b32.a1	gi|116627931|ref|YP_820550.1|STER_1163|Pyruvate kinase [Streptococcus thermophilus LMD-9]_hit-name:pyk _hit-score:909_hit-evalue:0.0_identity-percent:94.2	2	4
242	LIVALTESGNTAR	S8:+79.96633	8	409	b32.a2	gi|116627931|ref|YP_820550.1|STER_1163|Pyruvate kinase [Streptococcus thermophilus LMD-9]_hit-name:pyk _hit-score:909_hit-evalue:0.0_identity-percent:94.2	1	2
243	LIVALTESGNTAR	T6:+79.96633	6	407	b32.a2	gi|116627931|ref|YP_820550.1|STER_1163|Pyruvate kinase [Streptococcus thermophilus LMD-9]_hit-name:pyk _hit-score:909_hit-evalue:0.0_identity-percent:94.2	1	0
244	VALESGLVESGDNIVIVAGIPVGSGNTNTMR	S10:+79.96633	10	474	b32.a3	gi|116627931|ref|YP_820550.1|STER_1163|Pyruvate kinase [Streptococcus thermophilus LMD-9]_hit-name:pyk _hit-score:909_hit-evalue:0.0_identity-percent:94.2	0	1
245	SFSFDSASVQGAVIK	S6:+79.96633	6	7	b33.a1	gi|116627605|ref|YP_820224.1|STER_0777|Cell division GTPase [Streptococcus thermophilus LMD-9]_hit-name:ftsZ _hit-score:718_hit-evalue:0.0_identity-percent:87.0454545454545	0	2
246	KVTTAPSQSSVPNQQVAQEQQR	S7:+79.96633	7	339	b33.a2	gi|116627605|ref|YP_820224.1|STER_0777|Cell division GTPase [Streptococcus thermophilus LMD-9]_hit-name:ftsZ _hit-score:718_hit-evalue:0.0_identity-percent:87.0454545454545	0	1
247	KVTTAPSQSSVPNQQVAQEQQR	S9:+79.96633	9	341	b33.a2	gi|116627605|ref|YP_820224.1|STER_0777|Cell division GTPase [Streptococcus thermophilus LMD-9]_hit-name:ftsZ _hit-score:718_hit-evalue:0.0_identity-percent:87.0454545454545	1	1
248	RDNIVQAIEEGLSQTQELENQNEK	S13:+79.96633	13	407	b34.a1	gi|116627378|ref|YP_819997.1|STER_0523|cell division membrane protein [Streptococcus thermophilus LMD-9]_hit-name:ftsW _hit-score:744_hit-evalue:0.0_identity-percent:90.3755868544601	0	1
249	RDNIVQAIEEGLSQTQELENQNEK	T15:+79.96633	15	409	b34.a1	gi|116627378|ref|YP_819997.1|STER_0523|cell division membrane protein [Streptococcus thermophilus LMD-9]_hit-name:ftsW _hit-score:744_hit-evalue:0.0_identity-percent:90.3755868544601	0	4
250	DNIVQAIEEGLSQTQELENQNEK	T14:+79.96633	14	409	b34.a1	gi|116627378|ref|YP_819997.1|STER_0523|cell division membrane protein [Streptococcus thermophilus LMD-9]_hit-name:ftsW _hit-score:744_hit-evalue:0.0_identity-percent:90.3755868544601	0	1
251	DNIVQAIEEGLSQTQELENQNEK	S12:+79.96633	12	407	b34.a1	gi|116627378|ref|YP_819997.1|STER_0523|cell division membrane protein [Streptococcus thermophilus LMD-9]_hit-name:ftsW _hit-score:744_hit-evalue:0.0_identity-percent:90.3755868544601	0	1
252	GYAQNNPIVEYQSESFK	Y2:+79.96633	2	752	b35.a1	gi|116628425|ref|YP_821044.1|STER_1705|secA|Preprotein translocase subunit SecA (ATPase, RNA helicase) [Streptococcus thermophilus LMD-9]_hit-name:secA _hit-score:1643_hit-evalue:0.0_identity-percent:98.5865724381625	1	4
253	VSTTATGNIQAHQADANGQEIDFSK	T4:+79.96633	4	804	b35.a2	gi|116628425|ref|YP_821044.1|STER_1705|secA|Preprotein translocase subunit SecA (ATPase, RNA helicase) [Streptococcus thermophilus LMD-9]_hit-name:secA _hit-score:1643_hit-evalue:0.0_identity-percent:98.5865724381625	0	1
254	VSTTATGNIQAHQADANGQEIDFSK	T6:+79.96633	6	806	b35.a2	gi|116628425|ref|YP_821044.1|STER_1705|secA|Preprotein translocase subunit SecA (ATPase, RNA helicase) [Streptococcus thermophilus LMD-9]_hit-name:secA _hit-score:1643_hit-evalue:0.0_identity-percent:98.5865724381625	0	3
255	KPVEETSVPVGHK	T6:+79.96633	6	74	b36.a1	gi|116627594|ref|YP_820213.1|STER_0765|hypothetical protein STER_0765 [Streptococcus thermophilus LMD-9]_hit-name:tnpSth1 _hit-score:30_hit-evalue:0.062_identity-percent:20.4081632653061	0	3
256	KPVEETSVPVGHK	S7:+79.96633	7	75	b36.a1	gi|116627594|ref|YP_820213.1|STER_0765|hypothetical protein STER_0765 [Streptococcus thermophilus LMD-9]_hit-name:tnpSth1 _hit-score:30_hit-evalue:0.062_identity-percent:20.4081632653061	0	1
257	SFIDKGELVPDEVTNGIVK	S1:+79.96633	1	51	b37.a1	gi|116628577|ref|YP_821196.1|STER_1886|Adenylate kinase [Streptococcus thermophilus LMD-9]_hit-name:adk _hit-score:433_hit-evalue:1e-123_identity-percent:99.5412844036697	4	5
258	IGETHEGASQMDWMEQEQER	T4:+79.96633	4	43	b38.a1	gi|116628478|ref|YP_821097.1|STER_1762|Translation elongation factor (GTPase) [Streptococcus thermophilus LMD-9]_hit-name:fus _hit-score:1366_hit-evalue:0.0_identity-percent:100	0	6
259	IGETHEGASQMDWMEQEQER	S9:+79.96633	9	48	b38.a1	gi|116628478|ref|YP_821097.1|STER_1762|Translation elongation factor (GTPase) [Streptococcus thermophilus LMD-9]_hit-name:fus _hit-score:1366_hit-evalue:0.0_identity-percent:100	1	0
260	EIVHLGLEDNNFDSDINPLETTGAYLSPK	T21:+79.96633	21	115	b39.a1	gi|116627434|ref|YP_820053.1|STER_0588|Predicted sulfurtransferase [Streptococcus thermophilus LMD-9]_hit-name:rheB _hit-score:28_hit-evalue:0.27_identity-percent:44.7368421052632	0	4
261	EIVHLGLEDNNFDSDINPLETTGAYLSPK	T22:+79.96633	22	116	b39.a1	gi|116627434|ref|YP_820053.1|STER_0588|Predicted sulfurtransferase [Streptococcus thermophilus LMD-9]_hit-name:rheB _hit-score:28_hit-evalue:0.27_identity-percent:44.7368421052632	0	1
262	FDSILTDNGATVVESK	S3:+79.96633	3	28	b40.a1	gi|116628446|ref|YP_821065.1|STER_1728|rpsF|Ribosomal protein S6 [Streptococcus thermophilus LMD-9]_hit-name:rpsF _hit-score:190_hit-evalue:4e-51_identity-percent:98.9583333333333	3	3
263	TGTVTMDVAK	T5:+79.96633	5	146	b41.a1	gi|116628505|ref|YP_821124.1|STER_1797|rplA|Ribosomal protein L1 [Streptococcus thermophilus LMD-9]_hit-name:rplA _hit-score:417_hit-evalue:1e-119_identity-percent:94.7598253275109	1	4
264	HSNETVEFEGETYPLIR	T5:+79.96633	5	34	b42.a1	gi|116627614|ref|YP_820233.1|STER_0787|rpmE2|Ribosomal protein L31 [Streptococcus thermophilus LMD-9]_hit-name:rpmE _hit-score:169_hit-evalue:5e-45_identity-percent:100	0	1
265	HSNETVEFEGETYPLIR	S2:+79.96633	2	31	b42.a1	gi|116627614|ref|YP_820233.1|STER_0787|rpmE2|Ribosomal protein L31 [Streptococcus thermophilus LMD-9]_hit-name:rpmE _hit-score:169_hit-evalue:5e-45_identity-percent:100	0	1
266	VEISSDSHPFYTGR	S4:+79.96633	4	50	b42.a2	gi|116627614|ref|YP_820233.1|STER_0787|rpmE2|Ribosomal protein L31 [Streptococcus thermophilus LMD-9]_hit-name:rpmE _hit-score:169_hit-evalue:5e-45_identity-percent:100	1	1
267	MNTDETITIYDVAR	M1:+15.99491 - T3:+79.96633 - M1:+42.01057	3	3	b43.a1	gi|116627515|ref|YP_820134.1|STER_0679|catabolite control protein A [Streptococcus thermophilus LMD-9]_hit-name:tnp1191 _hit-score:_hit-evalue:0.042_identity-percent:34.1463414634146	1	1
268	TGKLPGNQGEAVNPTQQHGPK	T1:+79.96633	1	47	b44.a1	gi|116628305|ref|YP_820924.1|STER_1578|ATP-binding subunit of Clp protease and DnaK/DnaJ chaperones [Streptococcus thermophilus LMD-9]_hit-name:clpL _hit-score:1241_hit-evalue:0.0_identity-percent:93.7134502923977	3	0
269	LIGTTAGYVGYDDNSNTLTER	T4:+79.96633	4	492	b44.a2	gi|116628305|ref|YP_820924.1|STER_1578|ATP-binding subunit of Clp protease and DnaK/DnaJ chaperones [Streptococcus thermophilus LMD-9]_hit-name:clpL _hit-score:1241_hit-evalue:0.0_identity-percent:93.7134502923977	0	1
270	LIGTTAGYVGYDDNSNTLTER	S15:+79.96633	15	503	b44.a2	gi|116628305|ref|YP_820924.1|STER_1578|ATP-binding subunit of Clp protease and DnaK/DnaJ chaperones [Streptococcus thermophilus LMD-9]_hit-name:clpL _hit-score:1241_hit-evalue:0.0_identity-percent:93.7134502923977	0	1
271	SQLDFDTNTITEK	T9:+79.96633	9	426	b45.a1	gi|116627632|ref|YP_820251.1|STER_0808|Cation transport ATPase [Streptococcus thermophilus LMD-9]_hit-name:pacL1 _hit-score:1602_hit-evalue:0.0_identity-percent:95.6719817767654	0	4
272	YMNEKPVAK	Y1:+79.96633	1	730	b45.a2	gi|116627632|ref|YP_820251.1|STER_0808|Cation transport ATPase [Streptococcus thermophilus LMD-9]_hit-name:pacL1 _hit-score:1602_hit-evalue:0.0_identity-percent:95.6719817767654	0	1
273	SGTTTEPAIAFR	T4:+79.96633	4	149	b46.a1	gi|116627134|ref|YP_819753.1|STER_0241|p gi|Glucose-6-phosphate isomerase [Streptococcus thermophilus LMD-9]_hit-name:pgi _hit-score:890_hit-evalue:0.0_identity-percent:100	1	2
274	ATETTEEVVEETKETSELEEAQAR	T4:+79.96633 - A1:+42.01056	4	46	b47.a1	gi|116627082|ref|YP_819701.1|STER_0162|Molecular chaperone GrpE (heat shock protein) [Streptococcus thermophilus LMD-9]_hit-name:grpE _hit-score:252_hit-evalue:3e-69_identity-percent:91.4893617021277	1	0
275	ATETTEEVVEETKETSELEEAQAR	T2:+79.96633 - A1:+42.01056	2	44	b47.a1	gi|116627082|ref|YP_819701.1|STER_0162|Molecular chaperone GrpE (heat shock protein) [Streptococcus thermophilus LMD-9]_hit-name:grpE _hit-score:252_hit-evalue:3e-69_identity-percent:91.4893617021277	1	1
276	YFESLEEFSEGEMK	S9:+79.96633	9	38	b48.a1	gi|116628116|ref|YP_820735.1|STER_1366|Beta-galactosidase [Streptococcus thermophilus LMD-9]_hit-name:lacZ _hit-score:2081_hit-evalue:0.0_identity-percent:98.5380116959064	0	5
277	ANGALELVIKPYDTYQIFDSNGEPISSEQK	S26:+79.96633	26	120	b49.a1	gi|116627484|ref|YP_820103.1|STER_0644|Peptidoglycan interpeptide bridge formation enzyme [Streptococcus thermophilus LMD-9]_hit-name:murN _hit-score:815_hit-evalue:0.0_identity-percent:99.0267639902676	1	1
278	ANGALELVIKPYDTYQIFDSNGEPISSEQK	S27:+79.96633	27	121	b49.a1	gi|116627484|ref|YP_820103.1|STER_0644|Peptidoglycan interpeptide bridge formation enzyme [Streptococcus thermophilus LMD-9]_hit-name:murN _hit-score:815_hit-evalue:0.0_identity-percent:99.0267639902676	0	1
279	VTSASASRPAYASATSEPSHATGNIASASNYDILK	S13:+79.96633	13	72	b50.a1	gi|116627168|ref|YP_819787.1|STER_0280|Cell division initiation protein [Streptococcus thermophilus LMD-9]_hit-name:divIVA _hit-score:44_hit-evalue:9e-07_identity-percent:40	0	1
280	VAEIGVSYAGTPVLAHELASK	S20:+79.96633	20	244	b51.a1	gi|116627945|ref|YP_820564.1|STER_1178|hypothetical protein STER_1178 [Streptococcus thermophilus LMD-9]_hit-name:obg _hit-score:27_hit-evalue:0.29_identity-percent:26.4367816091954	0	1
281	VAEIGVSYAGTPVLAHELASK	T11:+79.96633	11	235	b51.a1	gi|116627945|ref|YP_820564.1|STER_1178|hypothetical protein STER_1178 [Streptococcus thermophilus LMD-9]_hit-name:obg _hit-score:27_hit-evalue:0.29_identity-percent:26.4367816091954	1	1
282	TIEPELVEK	T1:+79.96633 - T1:+42.01056	1	13	b51.a2	gi|116627945|ref|YP_820564.1|STER_1178|hypothetical protein STER_1178 [Streptococcus thermophilus LMD-9]_hit-name:obg _hit-score:27_hit-evalue:0.29_identity-percent:26.4367816091954	0	1
283	DGGVDIVTSSLPSDIKDAVVK	T8:+79.96633	8	325	b52.a1	gi|116627672|ref|YP_820291.1|STER_0856|Uncharacterized ABC-type transport system, periplasmic component/surface lipoprotein [Streptococcus thermophilus LMD-9]_hit-name:ileS _hit-score:26_hit-evalue:1.1_identity-percent:21.6216216216216	0	3
284	GATVTGSGKPATLETGLVVNVPDFIEAGQK	T5:+79.96633	5	147	b53.a1	gi|116628435|ref|YP_821054.1|STER_1715|Translation elongation factor P (EF-P)/translation initiation factor 5A (eIF-5A) [Streptococcus thermophilus LMD-9]_hit-name:efp _hit-score:328_hit-evalue:3e-92_identity-percent:90.8602150537634	0	2
285	GATVTGSGKPATLETGLVVNVPDFIEAGQK	T3:+79.96633	3	145	b53.a1	gi|116628435|ref|YP_821054.1|STER_1715|Translation elongation factor P (EF-P)/translation initiation factor 5A (eIF-5A) [Streptococcus thermophilus LMD-9]_hit-name:efp _hit-score:328_hit-evalue:3e-92_identity-percent:90.8602150537634	0	1
286	GATVTGSGKPATLETGLVVNVPDFIEAGQK	S7:+79.96633	7	149	b53.a1	gi|116628435|ref|YP_821054.1|STER_1715|Translation elongation factor P (EF-P)/translation initiation factor 5A (eIF-5A) [Streptococcus thermophilus LMD-9]_hit-name:efp _hit-score:328_hit-evalue:3e-92_identity-percent:90.8602150537634	0	1
287	LMMETIMKWSDQAYGIK	S10:+79.96633 - T5:+79.96633 - Y14:+79.96633	10 and 5 and 14	157 and 152 and 161	b54.a1	gi|116628119|ref|YP_820738.1|STER_1369|UDP-glucose 4-epimerase [Streptococcus thermophilus LMD-9]_hit-name:galE1 _hit-score:674_hit-evalue:0.0_identity-percent:99.3993993993994	2	1
288	SNTATFNTSQNLK	T8:+79.96633	8	9	b55.a1	gi|116627463|ref|YP_820082.1|STER_0618|Predicted membrane protein, hemolysin III homolog [Streptococcus thermophilus LMD-9]_hit-name:hlyIII _hit-score:428_hit-evalue:1e-122_identity-percent:94.6666666666667	0	1
289	TTNYQDDQGLNSNSIK	T2:+79.96633	2	23	b56.a1	gi|116627556|ref|YP_820175.1|STER_0723|hypothetical protein STER_0723 [Streptococcus thermophilus LMD-9]_hit-name:sthII _hit-score:20_hit-evalue:6.6_identity-percent:25.7142857142857	0	1
290	EHWGDLSKDYELSK	S7:+79.96633 - E1:+42.01056	7	55	b57.a1	gi|116628347|ref|YP_820966.1|STER_1623|Carbonic anhydrase [Streptococcus thermophilus LMD-9]_hit-name:cah _hit-score:498_hit-evalue:1e-143_identity-percent:93.0769230769231	0	2
291	KSQEVQWGYTGITGPEHWGDLSK	S2:+79.96633 - Y9:+79.96633	2 and 9	35 and 42	b57.a1	gi|116628347|ref|YP_820966.1|STER_1623|Carbonic anhydrase [Streptococcus thermophilus LMD-9]_hit-name:cah _hit-score:498_hit-evalue:1e-143_identity-percent:93.0769230769231	0	1
292	AKENENLESTEETVEEVVADKDTEQEQLNR	T10:+79.96633	10	11	b58.a1	gi|116627350|ref|YP_819969.1|STER_0492|Parvulin-like peptidyl-prolyl isomerase [Streptococcus thermophilus LMD-9]_hit-name:prtM _hit-score:506_hit-evalue:1e-145_identity-percent:89.0728476821192	0	2
293	AKENENLESTEETVEEVVADKDTEQEQLNR	S9:+79.96633	9	10	b58.a1	gi|116627350|ref|YP_819969.1|STER_0492|Parvulin-like peptidyl-prolyl isomerase [Streptococcus thermophilus LMD-9]_hit-name:prtM _hit-score:506_hit-evalue:1e-145_identity-percent:89.0728476821192	0	1
294	VTVEMSPYDLTR	Y8:+79.96633	8	60	b59.a1	gi|116628576|ref|YP_821195.1|STER_1885|infA|Translation initiation factor 1 [Streptococcus thermophilus LMD-9]_hit-name:tnp1239 _hit-score:26_hit-evalue:0.096_identity-percent:35.7142857142857	1	2
295	LTAPSVQFDETTGDYSR	T2:+79.96633	2	23	b60.a1	gi|116628639|ref|YP_821258.1|STER_1953|rpmF|Ribosomal protein L32 [Streptococcus thermophilus LMD-9]_hit-name:rpmF _hit-score:123_hit-evalue:6e-31_identity-percent:100	0	1
296	LTAPSVQFDETTGDYSR	T12:+79.96633	12	33	b60.a1	gi|116628639|ref|YP_821258.1|STER_1953|rpmF|Ribosomal protein L32 [Streptococcus thermophilus LMD-9]_hit-name:rpmF _hit-score:123_hit-evalue:6e-31_identity-percent:100	0	1
297	LTAPSVQFDETTGDYSR	S5:+79.96633	5	26	b60.a1	gi|116628639|ref|YP_821258.1|STER_1953|rpmF|Ribosomal protein L32 [Streptococcus thermophilus LMD-9]_hit-name:rpmF _hit-score:123_hit-evalue:6e-31_identity-percent:100	0	1
298	DYDSQIAATNNAISNLASQQEAAQAQVATIQSQVSTLR	S14:+79.96633 - D1:+42.01056	14	39	b61.a1	gi|116626992|ref|YP_819611.1|STER_0042|Surface antigen [Streptococcus thermophilus LMD-9]_hit-name:pcsB _hit-score:192_hit-evalue:7e-51_identity-percent:80.8695652173913	0	2
299	DYDSQIAATNNAISNLASQQEAAQAQVATIQSQVSTLR	S18:+79.96633 - D1:+42.01056	18	43	b61.a1	gi|116626992|ref|YP_819611.1|STER_0042|Surface antigen [Streptococcus thermophilus LMD-9]_hit-name:pcsB _hit-score:192_hit-evalue:7e-51_identity-percent:80.8695652173913	0	1
300	MTLASQIASDLLDIK	M1:+15.99491 - T2:+79.96633	2	2	b62.a1	gi|116627774|ref|YP_820393.1|STER_0981|pyrE|Orotate phosphoribosyltransferase [Streptococcus thermophilus LMD-9]_hit-name:pyrE _hit-score:408_hit-evalue:1e-116_identity-percent:99.5215311004785	2	1
301	DPENPLNQFNQAGGSNFFDDFFSDLNNFR	S15:+79.96633	15	53	b63.a1	gi|116627487|ref|YP_820106.1|STER_0648|ATP-binding subunit of Clp protease and DnaK/DnaJ chaperones [Streptococcus thermophilus LMD-9]_hit-name:clpE _hit-score:1377_hit-evalue:0.0_identity-percent:94.1489361702128	2	1
302	GLPAQYGGFETFVDQLVSNR	Y6:+79.96633	6	16	b65.a1	gi|116628176|ref|YP_820795.1|STER_1437|Glycosyltransferase [Streptococcus thermophilus LMD-9]_hit-name:rgpA _hit-score:666_hit-evalue:0.0_identity-percent:81.9371727748691	0	2
303	INTQRQENGEAEFANPR	T3:+79.96633	3	173	b66.a1	gi|116628243|ref|YP_820862.1|STER_1513|ligA|NAD-dependent DNA ligase [Streptococcus thermophilus LMD-9]_hit-name:ligA _hit-score:1229_hit-evalue:0.0_identity-percent:97.5308641975309	2	0
304	YVPGQHGPNNR	Y1:+79.96633 - Y1:+42.01056	1	31	b67.a1	gi|116628655|ref|YP_821274.1|STER_1973|rpsD|Ribosomal protein S4 [Streptococcus thermophilus LMD-9]_hit-name:rpsD _hit-score:401_hit-evalue:1e-114_identity-percent:100	1	1
305	FLSNIINHHSDKVSVDA	S10:+79.96633	10	248	b68.a1	gi|116627887|ref|YP_820506.1|STER_1117|ABC-type polar amino acid transport system, ATPase component [Streptococcus thermophilus LMD-9]_hit-name:gnlQ _hit-score:266_hit-evalue:2e-73_identity-percent:54.9586776859504	1	0
306	SKPLLTDDVIEQAK	T6:+79.96633	6	7	b69.a1	gi|116627450|ref|YP_820069.1|STER_0605|hypothetical protein STER_0605 [Streptococcus thermophilus LMD-9]_NOHIT	0	2
307	SGNEDCTPLAVTISNDAANNK	C6:+57.02146 - T7:+79.96633	7	421	b70.a1	gi|116628232|ref|YP_820851.1|STER_1500|neopullulanase [Streptococcus thermophilus LMD-9]_hit-name:amyL _hit-score:1028_hit-evalue:0.0_identity-percent:100	1	1
308	SNYYQEPDYEDVNQLTEEGLPVYR	T16:+79.96633	16	88	b71.a1	gi|116627533|ref|YP_820152.1|STER_0698|Transcriptional regulator [Streptococcus thermophilus LMD-9]_hit-name:epsA _hit-score:57_hit-evalue:6e-10_identity-percent:27.6018099547511	0	2
309	INVNNYNDDAIQVLEGLDAVR	Y6:+79.96633 - I1:+42.01056	6	11	b72.a1	gi|116627477|ref|YP_820096.1|STER_0633|DNA topoisomerase IV subunit B [Streptococcus thermophilus LMD-9]_hit-name:parE _hit-score:1157_hit-evalue:0.0_identity-percent:90.9090909090909	1	1
310	PYDGDESFLAGPTERSLK	S16:+79.96633 - P1:+42.01056	16	54	b74.a1	gi|116628346|ref|YP_820965.1|STER_1622|Pyruvate-formate lyase [Streptococcus thermophilus LMD-9]_hit-name:pfl _hit-score:1562_hit-evalue:0.0_identity-percent:100	0	1
311	ADGVNYIK	Y6:+79.96633	6	314	b75.a1	gi|116627675|ref|YP_820294.1|STER_0859|Uncharacterized ABC-type transport system, permease component [Streptococcus thermophilus LMD-9]_hit-name:livH _hit-score:45_hit-evalue:2e-06_identity-percent:26.8181818181818	0	1
312	VITPAPSTETAETVK	T8:+79.96633	8	89	b76.a1	gi|116627136|ref|YP_819755.1|STER_0243|Preprotein translocase subunit YajC [Streptococcus thermophilus LMD-9]_hit-name:yajC _hit-score:185_hit-evalue:2e-49_identity-percent:89.2857142857143	0	1
313	NEIASESYDEATDKYTSTTALQK	Y8:+79.96633	8	75	b77.a1	gi|116628571|ref|YP_821190.1|STER_1880|rplQ|Ribosomal protein L17 [Streptococcus thermophilus LMD-9]_hit-name:rplQ _hit-score:246_hit-evalue:7e-68_identity-percent:100	0	1
314	LRQTISQIMPSLHQGK	S6:+79.96633	6	452	b78.a1	gi|116627964|ref|YP_820583.1|STER_1197|cell division membrane protein [Streptococcus thermophilus LMD-9]_hit-name:rodA _hit-score:777_hit-evalue:0.0_identity-percent:86.1052631578947	0	1
315	MSTYAIIK	M1:+15.99491 - S2:+79.96633	2	2	b79.a1	gi|116627316|ref|YP_819935.1|STER_0455|rplU|Ribosomal protein L21 [Streptococcus thermophilus LMD-9]_hit-name:rplU _hit-score:172_hit-evalue:1e-45_identity-percent:86.5384615384615	0	1
316	LINTDNVASGVNVEVGKK	S9:+79.96633	9	59	b80.a1	gi|116628646|ref|YP_821265.1|STER_1962|hypothetical protein STER_1962 [Streptococcus thermophilus LMD-9]_hit-name:grpE _hit-score:24_hit-evalue:1.4_identity-percent:36.3636363636364	0	1
317	VLTPEEESGQISLSGK	S8:+79.96633	8	136	b81.a1	gi|116627233|ref|YP_819852.1|STER_0353|Predicted metal-binding, possibly nucleic acid-binding protein [Streptococcus thermophilus LMD-9]_hit-name:alaS _hit-score:26_hit-evalue:0.45_identity-percent:38.8888888888889	0	1
318	DLSQDQVQAVFDR	S3:+79.96633	3	15	b82.a1	gi|116628281|ref|YP_820900.1|STER_1552|trpD|Anthranilate phosphoribosyltransferase [Streptococcus thermophilus LMD-9]_hit-name:trpD _hit-score:640_hit-evalue:0.0_identity-percent:99.4011976047904	0	1
319	AWVRSFGVKATISNCSNNYGPYQHIEK	C15:+57.02146 - S5:+79.96633	5	178	b83.a1	gi|116627988|ref|YP_820607.1|STER_1222|dTDP-D-glucose 4,6-dehydratase [Streptococcus thermophilus LMD-9]_hit-name:rmlB _hit-score:720_hit-evalue:0.0_identity-percent:100	1	0
320	ATIGTVGNEQQSLINLGK	S12:+79.96633	12	201	b85.a1	gi|116628595|ref|YP_821214.1|STER_1904|rplB|Ribosomal protein L2 [Streptococcus thermophilus LMD-9]_hit-name:rplB _hit-score:557_hit-evalue:1e-161_identity-percent:100	0	1
321	SIGKGQDWTLTAEVVTKPEVK	S1:+79.96633	1	97	b86.a1	gi|116627090|ref|YP_819709.1|STER_0191|tig|FKBP-type peptidyl-prolyl cis-trans isomerase (trigger factor) [Streptococcus thermophilus LMD-9]_hit-name:tig _hit-score:737_hit-evalue:0.0_identity-percent:90.632318501171	0	1
322	DVLSVGQDVTVK	S4:+79.96633	4	324	b87.a1	gi|116627481|ref|YP_820100.1|STER_0639|rpsA|Ribosomal protein S1 [Streptococcus thermophilus LMD-9]_hit-name:rpsA _hit-score:694_hit-evalue:0.0_identity-percent:92	0	1
323	LVIGPCSSDNEKAVLDYAHR	C6:+57.02146 - S7:+79.96633 - S8:+79.96633	7 and 8	55 and 56	b88.a1	gi|116628423|ref|YP_821042.1|STER_1703|3-deoxy-D-arabino-heptulosonate 7-phosphate (DAHP) synthase [Streptococcus thermophilus LMD-9]_hit-name:aroG1 _hit-score:687_hit-evalue:0.0_identity-percent:99.7084548104956	1	0
324	GISEVVFDR	S3:+79.96633	3	89	b89.a1	gi|116628582|ref|YP_821201.1|STER_1891|rplR|Ribosomal protein L18 [Streptococcus thermophilus LMD-9]_hit-name:rplR _hit-score:227_hit-evalue:4e-62_identity-percent:98.3050847457627	1	0
325	TLNSAIANAENNFGLEK	S4:+79.96633	4	57	b90.a1	gi|116628593|ref|YP_821212.1|STER_1902|rplV|Ribosomal protein L22 [Streptococcus thermophilus LMD-9]_hit-name:rplV _hit-score:218_hit-evalue:3e-59_identity-percent:100	0	1
326	FNYSSVMAVPK	Y3:+79.96633	3	23	b91.a1	gi|116628586|ref|YP_821205.1|STER_1895|rplE|Ribosomal protein L5 [Streptococcus thermophilus LMD-9]_hit-name:rplE _hit-score:320_hit-evalue:9e-90_identity-percent:91.6666666666667	1	0
327	ALAAGGNAVMLGSMFAGTDEAPGETEIFQGR	S13:+79.96633 - T18:+79.96633	13 and 18	367 and 372	b92.a1	gi|116628674|ref|YP_821293.1|STER_1992|IMP dehydrogenase/GMP reductase [Streptococcus thermophilus LMD-9]_hit-name:guaB _hit-score:923_hit-evalue:0.0_identity-percent:96.551724137931	0	1
328	EAGIIDLPSTLR	S9:+79.96633	9	393	b94.a1	gi|116628468|ref|YP_821087.1|STER_1751|Glutamine synthetase [Streptococcus thermophilus LMD-9]_hit-name:tnp1239 _hit-score:_hit-evalue:9.6_identity-percent:35.1351351351351	1	0
329	VQIDTPEEYQGSIIQALSER	S18:+79.96633	18	425	b95.a1	gi|116627599|ref|YP_820218.1|STER_0771|Predicted membrane GTPase involved in stress response [Streptococcus thermophilus LMD-9]_hit-name:typA _hit-score:1145_hit-evalue:0.0_identity-percent:95.7723577235772	0	1
330	VISIGGDGMLLSAFHMYEKELARVRFVGIHTGHLGF	M9:+15.99491 - S12:+79.96633 - Y17:+79.96633 - V1:+42.01056	12 and 17	51 and 56	b96.a1	gi|116628161|ref|YP_820780.1|STER_1422|ppnK|NAD kinase [Streptococcus thermophilus LMD-9]_hit-name:ppnK _hit-score:521_hit-evalue:1e-150_identity-percent:97.7611940298508	1	0
331	KNLTLLGSKETPYIFEYSPQVLESFDNR	S8:+79.96633 - T11:+79.96633	8 and 11	15 and 18	b97.a1	gi|116627686|ref|YP_820305.1|STER_0872|Enzyme related to GTP cyclohydrolase I [Streptococcus thermophilus LMD-9]_hit-name:punA _hit-score:24_hit-evalue:1.5_identity-percent:29.7872340425532	0	1
332	NQTSSVTTSPVAPTVEVVASSPQVPVAPVAAPAAV	S20:+79.96633 - S21:+79.96633 - T14:+79.96633	20 and 21 and 14	54 and 55 and 48	b99.a1	gi|116627300|ref|YP_819919.1|STER_0435|Biotin carboxyl carrier protein [Streptococcus thermophilus LMD-9]_hit-name:accB _hit-score:211_hit-evalue:4e-57_identity-percent:72.8395061728395	0	1
333	DTAYQVIERIAYSYANGDAMLPSIDR	M20:+15.99491 - S13:+79.96633	13	139	c100.a1	gi|116627957|ref|YP_820576.1|STER_1190|Adenine/guanine|reversed phosphoribosyltransferase or related PRPP-binding protein [Streptococcus thermophilus LMD-9]_hit-name:apt _hit-score:346_hit-evalue:1e-97_identity-percent:100	1	0
334	SHQDEVEAPEGITFEVPSATSIVVSGINK	T20:+79.96633	20	129	c101.a1	gi|116628583|ref|YP_821202.1|STER_1892|rplF|Ribosomal protein L6P/L9E [Streptococcus thermophilus LMD-9]_hit-name:rplF _hit-score:353_hit-evalue:1e-99_identity-percent:100	0	1
335	VISTLTTGATLQEFLVPTETGALK	T7:+79.96633	7	34	c102.a1	gi|116628118|ref|YP_820737.1|STER_1368|aldose 1-epimerase [Streptococcus thermophilus LMD-9]_hit-name:galM _hit-score:707_hit-evalue:0.0_identity-percent:100	0	1
336	TKNFGGLTAVGDVSMELNEGELVGLIGPNGAGK	T1:+79.96633 - T1:+42.01056	1	10	c103.a1	gi|116627277|ref|YP_819896.1|STER_0401|ABC-type branched-chain amino acid transport system, ATPase component [Streptococcus thermophilus LMD-9]_hit-name:livG _hit-score:488_hit-evalue:1e-140_identity-percent:99.2125984251969	1	0
337	AVTCSDSSGFVYDPDGIDVDLLK	C4:+57.02146 - S8:+79.96633	8	266	c104.a1	gi|116627327|ref|YP_819946.1|STER_0467|Glutamate dehydrogenase/leucine dehydrogenase [Streptococcus thermophilus LMD-9]_hit-name:gdhA _hit-score:893_hit-evalue:0.0_identity-percent:100	0	1
338	MNIYDQLQAVEDRYEELGELLSDPEVVSDTK	Y14:+79.96633	14	14	c105.a1	gi|116627620|ref|YP_820239.1|STER_0793|prfA|Protein chain release factor A [Streptococcus thermophilus LMD-9]_hit-name:prfA _hit-score:653_hit-evalue:0.0_identity-percent:94.4289693593315	1	0
339	VQTIDPLFVAVADLSESVSDLNTR	S15:+79.96633	15	84	c106.a1	gi|116627554|ref|YP_820173.1|STER_0721|Uncharacterized protein containing a divergent version of the methyl-accepting chemotaxis-like domain [Streptococcus thermophilus LMD-9]_hit-name:pepB _hit-score:22_hit-evalue:4.0_identity-percent:28.5714285714286	0	1
